# Supplementary material for: Full-length transcriptome reconstruction reveals genetic differences in hybrids of Oryza sativa and Oryza punctata with different ploidy and genome compositions
Source: BMC Plant Biol. 2022 Mar 21;22:131. doi: 10.1186/s12870-022-03502-2 (PMC8935693; doi:10.1186/s12870-022-03502-2)
Supplement: Supplementary file 2 — Additional file 2: Table S1. Functional annotation of transcripts. [file 12870_2022_3502_MOESM2_ESM.xlsx]

## Sheet: F01
Table S1 Functional annotation of transcripts
group_ID	Final_ID	COG_class	COG_class_annotation	GO_annotation	KEGG_annotation	KEGG_pathway	KOG_class	KOG_class_annotation	Pfam_annotation	Swissprot_annotation	eggNOG_class	eggNOG_class_annotation	nr_annotation
PB.1.1	LOC_Os01g01010.1	[R]	General function prediction only	Molecular Function: Rab GTPase activator activity (GO:0005097);; Biological Process: positive regulation of Rab GTPase activity (GO:0032851);;	--	--	[T]	Signal transduction mechanisms	Rab-GTPase-TBC domain	--	S	Function unknown	putative GTPase-activating protein [Oryza sativa Japonica Group]
PB.2.1	LOC_Os01g01030.1	[Q]	Secondary metabolites biosynthesis, transport and catabolism	Molecular Function: copper ion binding (GO:0005507);; Cellular Component: mitochondrion (GO:0005739);; Cellular Component: plasma membrane (GO:0005886);; Molecular Function: L-ascorbate oxidase activity (GO:0008447);; Cellular Component: plasmodesma (GO:0009506);; Biological Process: oxidation-reduction process (GO:0055114);;	--	--	[Q]	Secondary metabolites biosynthesis, transport and catabolism	Multicopper oxidase;; Multicopper oxidase;; Multicopper oxidase	Monocopper oxidase-like protein SKU5 (Precursor) GN=SKU5 OS=Arabidopsis thaliana (Mouse-ear cress) PE=1 SV=1	Q	Secondary metabolites biosynthesis, transport and catabolism	Os01g0100400 [Oryza sativa Japonica Group]
PB.3.1	LOC_Os01g01040.3	--	--	Cellular Component: mitochondrion (GO:0005739);; Biological Process: fatty acid beta-oxidation (GO:0006635);; Cellular Component: membrane (GO:0016020);; Biological Process: protein import into peroxisome matrix (GO:0016558);;	--	--	--	--	--	--	S	Function unknown	Os01g0100500 [Oryza sativa Japonica Group]
PB.4.1	LOC_Os01g01050.2	--	--	Molecular Function: nucleic acid binding (GO:0003676);;	--	--	--	--	R3H domain;; SUZ domain	--	S	Function unknown	Os01g0100600 [Oryza sativa Japonica Group]
PB.5.1	LOC_Os01g01060.1	[J]	Translation, ribosomal structure and biogenesis	Molecular Function: RNA binding (GO:0003723);; Molecular Function: structural constituent of ribosome (GO:0003735);; Biological Process: translation (GO:0006412);; Cellular Component: small ribosomal subunit (GO:0015935);;	K02989|7.92406e-147|osa:4326457|Os01g0100700; K02989 small subunit ribosomal protein S5e (A)	ko03010:Ribosome	[J]	Translation, ribosomal structure and biogenesis	Ribosomal protein S7p/S5e	40S ribosomal protein S5 (Fragment) GN=RPS5 OS=Cicer arietinum (Chickpea) PE=2 SV=1	J	Translation, ribosomal structure and biogenesis	Os01g0100700 [Oryza sativa Japonica Group]
PB.6.1	LOC_Os01g01070.2	--	--	Cellular Component: cytoplasmic membrane-bounded vesicle (GO:0016023);;	--	--	--	--	Protein of unknown function (DUF1664)	--	S	Function unknown	Os01g0100800 [Oryza sativa Japonica Group]
PB.7.1	LOC_Os01g01080.1	[E]	Amino acid transport and metabolism	Cellular Component: endoplasmic reticulum membrane (GO:0005789);; Biological Process: cellular amino acid metabolic process (GO:0006520);; Biological Process: fatty acid beta-oxidation (GO:0006635);; Biological Process: ER to Golgi vesicle-mediated transport (GO:0006888);; Biological Process: apoptotic process (GO:0006915);; Molecular Function: sphinganine-1-phosphate aldolase activity (GO:000811…	K01634|0|osa:4326459|Os01g0100900; K01634 sphinganine-1-phosphate aldolase [EC:4.1.2.27] (A)	ko00600:Sphingolipid metabolism	[E]	Amino acid transport and metabolism	Pyridoxal-dependent decarboxylase conserved domain;; Aminotransferase class-V	Sphingosine-1-phosphate lyase (Precursor) OS=Oryza sativa subsp. japonica (Rice) PE=2 SV=2	E	Amino acid transport and metabolism	Os01g0100900 [Oryza sativa Japonica Group]
PB.8.1	LOC_Os01g01120.1	[C]	Energy production and conversion	Molecular Function: magnesium ion binding (GO:0000287);; Cellular Component: chloroplast (GO:0009507);; Molecular Function: lyase activity (GO:0016829);; Biological Process: L-methionine biosynthetic process from methylthioadenosine (GO:0019509);; Molecular Function: acireductone synthase activity (GO:0043874);;	K09880|0|osa:4326460|Os01g0101200; K09880 enolase-phosphatase E1 [EC:3.1.3.77] (A)	ko00270:Cysteine and methionine metabolism	[E]	Amino acid transport and metabolism	Haloacid dehalogenase-like hydrolase	Enolase-phosphatase E1 {ECO:0000255|HAMAP-Rule:MF_03118} GN=OsI_36120 OS=Oryza sativa subsp. indica (Rice) PE=2 SV=1	C	Energy production and conversion	P0402A09.8 [Oryza sativa Japonica Group]
PB.9.1	LOC_Os01g01150.1	--	--	Molecular Function: nucleotide binding (GO:0000166);; Biological Process: microtubule cytoskeleton organization (GO:0000226);; Biological Process: cytokinesis by cell plate formation (GO:0000911);; Molecular Function: RNA binding (GO:0003723);; Biological Process: cell adhesion (GO:0007155);; Molecular Function: zinc ion binding (GO:0008270);; Biological Process: organ morphogenesis (GO:0009887);…	--	--	--	--	Filamin/ABP280 repeat;; RNA recognition motif. (a.k.a. RRM, RBD, or RNP domain);; RNA recognition motif (a.k.a. RRM, RBD, or RNP domain);; RNA recognition motif. (a.k.a. RRM, RBD, or RNP domain)	Polyadenylate-binding protein-interacting protein 8 GN=CID8 OS=Arabidopsis thaliana (Mouse-ear cress) PE=1 SV=1	S	Function unknown	Os01g0101600 [Oryza sativa Japonica Group]
PB.10.1	LOC_Os01g01160.1	[O]	Posttranslational modification, protein turnover, chaperones	Cellular Component: nucleus (GO:0005634);; Biological Process: protein folding (GO:0006457);; Cellular Component: plastid (GO:0009536);; Biological Process: chlorophyll catabolic process (GO:0015996);; Molecular Function: heat shock protein binding (GO:0031072);;	--	--	[O]	Posttranslational modification, protein turnover, chaperones	DnaJ domain	Chaperone protein dnaJ 20, chloroplastic (Precursor) GN=F18A5.220 OS=Arabidopsis thaliana (Mouse-ear cress) PE=1 SV=2	O	Posttranslational modification, protein turnover, chaperones	P0402A09.13 [Oryza sativa Japonica Group]
PB.11.1	LOC_Os01g01170.1	--	--	Cellular Component: mitochondrion (GO:0005739);; Biological Process: DNA replication initiation (GO:0006270);; Biological Process: regulation of DNA replication (GO:0006275);; Biological Process: DNA methylation (GO:0006306);; Biological Process: cell proliferation (GO:0008283);; Biological Process: histone H3-K9 methylation (GO:0051567);; Biological Process: regulation of cell cycle (GO:0051726)…	--	--	--	--	--	--	S	Function unknown	Os01g0101800 [Oryza sativa Japonica Group]
PB.12.1	LOC_Os01g01302.1	[E]	Amino acid transport and metabolism	Molecular Function: shikimate kinase activity (GO:0004765);; Molecular Function: ATP binding (GO:0005524);; Biological Process: glycine catabolic process (GO:0006546);; Biological Process: tryptophan catabolic process (GO:0006569);; Biological Process: unsaturated fatty acid biosynthetic process (GO:0006636);; Biological Process: oxidoreduction coenzyme metabolic process (GO:0006733);; Biological…	--	--	--	--	Shikimate kinase	Probable inactive shikimate kinase like 1, chloroplastic (Precursor) GN=SKL1 OS=Arabidopsis thaliana (Mouse-ear cress) PE=2 SV=1	E	Amino acid transport and metabolism	unknown protein [Oryza sativa Japonica Group]
PB.13.1	PB.13.1	--	--	Molecular Function: DNA binding (GO:0003677);; Molecular Function: helicase activity (GO:0004386);; Molecular Function: ATP binding (GO:0005524);; Cellular Component: vacuolar membrane (GO:0005774);; Cellular Component: endoplasmic reticulum (GO:0005783);; Cellular Component: Golgi apparatus (GO:0005794);; Cellular Component: plasma membrane (GO:0005886);; Biological Process: DNA repair (GO:00062…	K13250|1.66736e-94|osa:4326440|Os01g0102700; K13250 translocon-associated protein subunit beta (A)	ko04141:Protein processing in endoplasmic reticulum	[U]	Intracellular trafficking, secretion, and vesicular transport	Translocon-associated protein beta (TRAPB)	--	U	Intracellular trafficking, secretion, and vesicular transport	Os01g0102700 [Oryza sativa Japonica Group]
PB.14.1	PB.14.1	[KL]	--	Molecular Function: DNA binding (GO:0003677);; Molecular Function: helicase activity (GO:0004386);; Molecular Function: ATP binding (GO:0005524);; Cellular Component: endoplasmic reticulum (GO:0005783);; Biological Process: DNA repair (GO:0006281);; Biological Process: response to gamma radiation (GO:0010332);; Cellular Component: integral component of membrane (GO:0016021);; Cellular Component: …	K10841|0|obr:102703621|DNA repair protein rhp26-like; K10841 DNA excision repair protein ERCC-6 (A)	ko03420:Nucleotide excision repair	[KL]	--	SNF2 family N-terminal domain;; Helicase conserved C-terminal domain	Protein CHROMATIN REMODELING 8 {ECO:0000303|PubMed:16547115} OS=Arabidopsis thaliana (Mouse-ear cress) PE=2 SV=1	L	Replication, recombination and repair	PREDICTED: DNA repair protein rhp26-like [Oryza brachyantha]
PB.15.1	LOC_Os01g01360.1	--	--	Molecular Function: transporter activity (GO:0005215);; Biological Process: oligopeptide transport (GO:0006857);; Cellular Component: integral component of membrane (GO:0016021);;	--	--	[E]	Amino acid transport and metabolism	POT family	Protein NRT1/ PTR FAMILY 6.1 GN=NPF6.1 OS=Arabidopsis thaliana (Mouse-ear cress) PE=2 SV=1	E	Amino acid transport and metabolism	Os01g0103100 [Oryza sativa Japonica Group]
PB.15.2	PB.15.2	[E]	Amino acid transport and metabolism	Molecular Function: transporter activity (GO:0005215);; Biological Process: oligopeptide transport (GO:0006857);; Cellular Component: integral component of membrane (GO:0016021);;	--	--	[E]	Amino acid transport and metabolism	POT family	Protein NRT1/ PTR FAMILY 6.1 GN=NPF6.1 OS=Arabidopsis thaliana (Mouse-ear cress) PE=2 SV=1	E	Amino acid transport and metabolism	PREDICTED: probable peptide/nitrate transporter At5g13400-like [Oryza brachyantha]
PB.16.1	LOC_Os01g01390.1	--	--	Cellular Component: mitochondrion (GO:0005739);; Cellular Component: plasma membrane (GO:0005886);;	--	--	--	--	--	Uncharacterized protein At1g76660 GN=At1g76660 OS=Arabidopsis thaliana (Mouse-ear cress) PE=2 SV=1	S	Function unknown	Os01g0103800 [Oryza sativa Japonica Group]
PB.17.1	LOC_Os01g01420.1	--	--	Cellular Component: plasma membrane (GO:0005886);; Molecular Function: zinc ion binding (GO:0008270);; Biological Process: response to cold (GO:0009409);; Biological Process: response to water deprivation (GO:0009414);; Cellular Component: plastid (GO:0009536);; Biological Process: response to salt stress (GO:0009651);; Biological Process: response to abscisic acid (GO:0009737);; Cellular Compone…	--	--	--	--	Tetratricopeptide repeat;; Tetratricopeptide repeat;; Tetratricopeptide repeat;; Tetratricopeptide repeat	--	S	Function unknown	hypothetical protein OsI_00037 [Oryza sativa Indica Group]
PB.18.1	LOC_Os01g01450.2	--	--	--	--	--	--	--	Ricin-type beta-trefoil lectin domain-like	--	S	Function unknown	hypothetical protein OsJ_00036 [Oryza sativa Japonica Group]
PB.18.2	LOC_Os01g01450.2	--	--	--	--	--	--	--	Ricin-type beta-trefoil lectin domain-like	--	S	Function unknown	hypothetical protein OsJ_00036 [Oryza sativa Japonica Group]
PB.19.1	PB.19.1	--	--	Biological Process: cytokinesis by cell plate formation (GO:0000911);; Molecular Function: microtubule motor activity (GO:0003777);; Molecular Function: ATP binding (GO:0005524);; Cellular Component: kinesin complex (GO:0005871);; Cellular Component: microtubule (GO:0005874);; Biological Process: microtubule-based movement (GO:0007018);; Biological Process: male meiosis cytokinesis (GO:0007112);;…	--	--	[Z]	Cytoskeleton	--	Kinesin-like protein NACK1 GN=NACK1 OS=Nicotiana tabacum (Common tobacco) PE=1 SV=1	Z	Cytoskeleton	Os01g0105400 [Oryza sativa Japonica Group]
PB.20.1	LOC_Os01g01640.1	[U]	Intracellular trafficking, secretion, and vesicular transport	Cellular Component: endoplasmic reticulum (GO:0005783);; Cellular Component: Golgi apparatus (GO:0005794);; Biological Process: retrograde vesicle-mediated transport, Golgi to ER (GO:0006890);; Cellular Component: integral component of membrane (GO:0016021);;	--	--	[U]	Intracellular trafficking, secretion, and vesicular transport	Rer1 family	Protein RER1A GN=RER1A OS=Arabidopsis thaliana (Mouse-ear cress) PE=1 SV=1	U	Intracellular trafficking, secretion, and vesicular transport	Os01g0106200 [Oryza sativa Japonica Group]
PB.21.1	PB.21.1	[TDBLU]	--	Biological Process: DNA damage checkpoint (GO:0000077);; Molecular Function: 1-phosphatidylinositol-3-phosphate 5-kinase activity (GO:0000285);; Biological Process: double-strand break repair via homologous recombination (GO:0000724);; Molecular Function: protein serine/threonine kinase activity (GO:0004674);; Molecular Function: ATP binding (GO:0005524);; Biological Process: sister chromatid coh…	K04728|0|osa:4326151|Os01g0106700; K04728 ataxia telangiectasia mutated family protein [EC:2.7.11.1] (A)	--	[TBLD]	--	Phosphatidylinositol 3- and 4-kinase;; FATC domain	Serine/threonine-protein kinase ATM GN=ATM OS=Arabidopsis thaliana (Mouse-ear cress) PE=2 SV=1	S	Function unknown	Os01g0106700 [Oryza sativa Japonica Group]
PB.22.1	LOC_Os01g01700.1	[OD]	--	Molecular Function: zinc ion binding (GO:0008270);; Biological Process: response to auxin (GO:0009733);; Cellular Component: SCF ubiquitin ligase complex (GO:0019005);; Cellular Component: Cul3-RING ubiquitin ligase complex (GO:0031463);;	K03868|3.06811e-66|osa:4326152|Os01g0106800; K03868 RING-box protein 1 (A)	ko03420:Nucleotide excision repair;ko04120:Ubiquitin mediated proteolysis;ko04141:Protein processing in endoplasmic reticulum	[O]	Posttranslational modification, protein turnover, chaperones	RING-H2 zinc finger;; Anaphase-promoting complex subunit 11 RING-H2 finger;; Ring finger domain	RING-box protein 1a GN=F7C8.160 OS=Arabidopsis thaliana (Mouse-ear cress) PE=1 SV=1	O	Posttranslational modification, protein turnover, chaperones	Os01g0106800 [Oryza sativa Japonica Group]
PB.22.2	LOC_Os01g01700.1	[OD]	--	Molecular Function: zinc ion binding (GO:0008270);; Biological Process: response to auxin (GO:0009733);; Cellular Component: SCF ubiquitin ligase complex (GO:0019005);; Cellular Component: Cul3-RING ubiquitin ligase complex (GO:0031463);;	K03868|3.06811e-66|osa:4326152|Os01g0106800; K03868 RING-box protein 1 (A)	ko03420:Nucleotide excision repair;ko04120:Ubiquitin mediated proteolysis;ko04141:Protein processing in endoplasmic reticulum	[O]	Posttranslational modification, protein turnover, chaperones	RING-H2 zinc finger;; Anaphase-promoting complex subunit 11 RING-H2 finger;; Ring finger domain	RING-box protein 1a GN=F7C8.160 OS=Arabidopsis thaliana (Mouse-ear cress) PE=1 SV=1	O	Posttranslational modification, protein turnover, chaperones	Os01g0106800 [Oryza sativa Japonica Group]
PB.23.1	LOC_Os01g01780.1	--	--	Molecular Function: transferase activity (GO:0016740);;	--	--	[GMW]	--	Exostosin family	Probable glycosyltransferase At5g03795 GN=At5g03795 OS=Arabidopsis thaliana (Mouse-ear cress) PE=3 SV=2	S	Function unknown	Os01g0107700 [Oryza sativa Japonica Group]
PB.24.1	PB.24.1	--	--	Cellular Component: plasma membrane (GO:0005886);;	--	--	--	--	--	--	S	Function unknown	Os01g0108000 [Oryza sativa Japonica Group]
PB.25.1	LOC_Os01g01870.1	--	--	Molecular Function: protein dimerization activity (GO:0046983);;	--	--	--	--	Helix-loop-helix DNA-binding domain	--	S	Function unknown	unknown protein [Oryza sativa Japonica Group]
PB.25.2	LOC_Os01g01870.1	--	--	Molecular Function: protein dimerization activity (GO:0046983);;	--	--	--	--	Helix-loop-helix DNA-binding domain	--	S	Function unknown	unknown protein [Oryza sativa Japonica Group]
PB.26.1	LOC_Os01g01920.2	[R]	General function prediction only	Molecular Function: phosphoric diester hydrolase activity (GO:0008081);; Biological Process: metabolic process (GO:0008152);; Molecular Function: metal ion binding (GO:0046872);;	--	--	[S]	Function unknown	HD domain	--	S	Function unknown	hypothetical protein OsI_00082 [Oryza sativa Indica Group]
PB.27.1	LOC_Os01g02000.1	--	--	Cellular Component: plasma membrane (GO:0005886);; Biological Process: phosphate ion transport (GO:0006817);; Cellular Component: integral component of membrane (GO:0016021);; Biological Process: cellular response to phosphate starvation (GO:0016036);; Biological Process: primary metabolic process (GO:0044238);; Biological Process: cellular biosynthetic process (GO:0044249);; Biological Process: …	--	--	[U]	Intracellular trafficking, secretion, and vesicular transport	EXS family;; SPX domain	Phosphate transporter PHO1-1 OS=Oryza sativa subsp. japonica (Rice) PE=2 SV=2	T	Signal transduction mechanisms	RecName: Full=Phosphate transporter PHO1-1; AltName: Full=Protein PHO1-1; Short=OsPHO1;1 [Oryza sativa Japonica Group]
PB.28.1	LOC_Os01g02020.1	[I]	Lipid transport and metabolism	Biological Process: metabolic process (GO:0008152);; Molecular Function: transferase activity, transferring acyl groups other than amino-acyl groups (GO:0016747);;	K00626|0|osa:4326136|Os01g0110400; K00626 acetyl-CoA C-acetyltransferase [EC:2.3.1.9] (A)	ko00071:Fatty acid degradation;ko00072:Synthesis and degradation of ketone bodies;ko00280:Valine, leucine and isoleucine degradation;ko00310:Lysine degradation;ko00380:Tryptophan metabolism;ko00620:Pyruvate metabolism;ko00630:Glyoxylate and dicarboxylate metabolism;ko00640:Propanoate metabolism;ko00650:Butanoate metabolism;ko00900:Terpenoid backbone biosynthesis;ko01200:Carbon metabolism;ko01212:…	[I]	Lipid transport and metabolism	Thiolase, N-terminal domain;; Thiolase, C-terminal domain;; Beta-ketoacyl synthase, N-terminal domain	Probable acetyl-CoA acetyltransferase, cytosolic 2 GN=At5g47720 OS=Arabidopsis thaliana (Mouse-ear cress) PE=2 SV=1	I	Lipid transport and metabolism	Os01g0110400 [Oryza sativa Japonica Group]
PB.29.1	LOC_Os01g02090.1	--	--	Cellular Component: plastid (GO:0009536);;	K18749|0|osa:4326141|Os01g0111200; K18749 protein LSM14 (A)	--	[U]	Intracellular trafficking, secretion, and vesicular transport	Scd6-like Sm domain;; FDF domain;; Ataxin 2 SM domain	Protein decapping 5 GN=DCP5 OS=Arabidopsis thaliana (Mouse-ear cress) PE=1 SV=1	S	Function unknown	Os01g0111200 [Oryza sativa Japonica Group]
PB.30.1	LOC_Os01g02100.1	--	--	Molecular Function: DNA binding (GO:0003677);; Biological Process: response to stress (GO:0006950);; Molecular Function: protein dimerization activity (GO:0046983);;	--	--	[L]	Replication, recombination and repair	hAT family C-terminal dimerisation region;; Domain of unknown function (DUF4413)	Putative AC transposase OS=Zea mays (Maize) PE=2 SV=2	S	Function unknown	Os01g0111400 [Oryza sativa Japonica Group]
PB.31.1	LOC_Os01g02139.1	--	--	Cellular Component: cytoplasmic membrane-bounded vesicle (GO:0016023);;	--	--	--	--	--	--	S	Function unknown	Os01g0111800 [Oryza sativa Japonica Group]
PB.31.2	LOC_Os01g02139.1	--	--	Cellular Component: cytoplasmic membrane-bounded vesicle (GO:0016023);;	--	--	--	--	--	--	S	Function unknown	Os01g0111800 [Oryza sativa Japonica Group]
PB.32.1	LOC_Os01g02150.1	--	--	Cellular Component: cytoplasmic membrane-bounded vesicle (GO:0016023);;	--	--	--	--	--	--	S	Function unknown	hypothetical protein OsJ_00097 [Oryza sativa Japonica Group]
PB.33.1	LOC_Os01g02300.1	[RTKL]	--	Molecular Function: protein serine/threonine kinase activity (GO:0004674);; Molecular Function: ATP binding (GO:0005524);; Biological Process: protein phosphorylation (GO:0006468);; Cellular Component: cytoplasmic membrane-bounded vesicle (GO:0016023);;	--	--	[T]	Signal transduction mechanisms	Protein kinase domain;; Protein tyrosine kinase	Glycerophosphodiester phosphodiesterase protein kinase domain-containing GDPDL2 {ECO:0000305} (Precursor) OS=Arabidopsis thaliana (Mouse-ear cress) PE=1 SV=1	T	Signal transduction mechanisms	Os01g0113300 [Oryza sativa Japonica Group]
PB.34.1	PB.34.1	[RTKL]	--	Molecular Function: protein serine/threonine kinase activity (GO:0004674);; Molecular Function: ATP binding (GO:0005524);; Biological Process: protein phosphorylation (GO:0006468);; Cellular Component: cytoplasmic membrane-bounded vesicle (GO:0016023);;	--	--	--	--	Thaumatin family;; Protein kinase domain;; Protein tyrosine kinase	G-type lectin S-receptor-like serine/threonine-protein kinase SD2-5 (Precursor) GN=SD25 OS=Arabidopsis thaliana (Mouse-ear cress) PE=1 SV=1	T	Signal transduction mechanisms	hypothetical protein OsJ_00116 [Oryza sativa Japonica Group]
PB.35.1	LOC_Os01g02870.1	--	--	Cellular Component: membrane (GO:0016020);; Cellular Component: cytoplasmic membrane-bounded vesicle (GO:0016023);;	--	--	--	--	EamA-like transporter family;; Triose-phosphate Transporter family	WAT1-related protein At3g18200 GN=At3g18200 OS=Arabidopsis thaliana (Mouse-ear cress) PE=2 SV=1	S	Function unknown	Os01g0117900 [Oryza sativa Japonica Group]
PB.36.1	LOC_Os01g02880.1	[G]	Carbohydrate transport and metabolism	Molecular Function: nucleic acid binding (GO:0003676);; Molecular Function: fructose-bisphosphate aldolase activity (GO:0004332);; Molecular Function: ATP binding (GO:0005524);; Cellular Component: mitochondrion (GO:0005739);; Biological Process: glycolytic process (GO:0006096);; Biological Process: pentose-phosphate shunt (GO:0006098);; Biological Process: response to oxidative stress (GO:000697…	K01623|0|osa:4326074|Os01g0118000; K01623 fructose-bisphosphate aldolase, class I [EC:4.1.2.13] (A)	ko00010:Glycolysis / Gluconeogenesis;ko00030:Pentose phosphate pathway;ko00051:Fructose and mannose metabolism;ko00710:Carbon fixation in photosynthetic organisms;ko01200:Carbon metabolism;ko01230:Biosynthesis of amino acids	[G]	Carbohydrate transport and metabolism	Fructose-bisphosphate aldolase class-I	Probable fructose-bisphosphate aldolase 3, chloroplastic (Precursor) GN=FBA3 OS=Arabidopsis thaliana (Mouse-ear cress) PE=1 SV=1	G	Carbohydrate transport and metabolism	Os01g0118000 [Oryza sativa Japonica Group]
PB.37.1	LOC_Os01g02884.1	[L]	Replication, recombination and repair	Molecular Function: double-stranded RNA binding (GO:0003725);; Molecular Function: fructose-bisphosphate aldolase activity (GO:0004332);; Molecular Function: ATP binding (GO:0005524);; Cellular Component: intracellular (GO:0005622);; Biological Process: glycolytic process (GO:0006096);; Molecular Function: ATP-dependent helicase activity (GO:0008026);;	K14442|0|dosa:Os01t0118100-01|Os01g0118100; Similar to Fructose-bisphosphate aldolase.; K14442 ATP-dependent RNA helicase DHX36 [EC:3.6.4.13] (A)	ko03018:RNA degradation	[A]	RNA processing and modification	Helicase associated domain (HA2);; Oligonucleotide/oligosaccharide-binding (OB)-fold;; Helicase conserved C-terminal domain;; Double-stranded RNA binding motif	Probable pre-mRNA-splicing factor ATP-dependent RNA helicase GN=At2g47250 OS=Arabidopsis thaliana (Mouse-ear cress) PE=2 SV=1	G	Carbohydrate transport and metabolism	hypothetical protein OsI_00149 [Oryza sativa Indica Group]
PB.38.1	LOC_Os01g02960.1	--	--	Cellular Component: plastid (GO:0009536);;	--	--	--	--	Protein of unknown function (DUF1618)	--	S	Function unknown	hypothetical protein OsJ_00169 [Oryza sativa Japonica Group]
PB.39.1	PB.39.1	[QR]	--	Cellular Component: nucleus (GO:0005634);; Cellular Component: cytosol (GO:0005829);; Molecular Function: methyltransferase activity (GO:0008168);; Biological Process: methylation (GO:0032259);;	--	--	[R]	General function prediction only	Methyltransferase domain;; Methyltransferase domain;; Methyltransferase domain;; Methyltransferase domain;; Methyltransferase small domain;; Methyltransferase domain;; Tellurite resistance protein TehB;; Methyltransferase domain;; Ribosomal protein L11 methyltransferase (PrmA)	--	S	Function unknown	Os01g0121100 [Oryza sativa Japonica Group]
PB.40.1	PB.40.1	--	--	--	--	--	--	--	--	--	--	--	hypothetical protein TRIUR3_29875 [Triticum urartu]
PB.41.1	LOC_Os01g03160.1	--	--	Molecular Function: acetylglucosaminyltransferase activity (GO:0008375);; Cellular Component: membrane (GO:0016020);; Cellular Component: cytoplasmic membrane-bounded vesicle (GO:0016023);;	--	--	[G]	Carbohydrate transport and metabolism	Core-2/I-Branching enzyme	--	S	Function unknown	Os01g0121800 [Oryza sativa Japonica Group]
PB.42.1	LOC_Os01g03490.1	--	--	Biological Process: regulation of flower development (GO:0009909);; Biological Process: histone modification (GO:0016570);; Biological Process: metal ion transport (GO:0030001);; Molecular Function: metal ion binding (GO:0046872);; Biological Process: floral organ formation (GO:0048449);;	--	--	[P]	Inorganic ion transport and metabolism	Heavy-metal-associated domain	Copper transport protein ATX1 GN=ATX1 OS=Arabidopsis thaliana (Mouse-ear cress) PE=1 SV=1	S	Function unknown	Os01g0125600 [Oryza sativa Japonica Group]
PB.43.1	PB.43.1	[R]	General function prediction only	--	--	--	[Z]	Cytoskeleton	WD domain, G-beta repeat;; WD domain, G-beta repeat	Cilia- and flagella-associated protein 52 {ECO:0000305} OS=Chlamydomonas reinhardtii (Chlamydomonas smithii) PE=1 SV=1	S	Function unknown	Os01g0125800 [Oryza sativa Japonica Group]
PB.43.2	LOC_Os01g03510.1	[R]	General function prediction only	Molecular Function: nucleotide binding (GO:0000166);; Cellular Component: cytosol (GO:0005829);; Biological Process: calcium ion transport (GO:0006816);; Biological Process: water transport (GO:0006833);; Biological Process: Golgi organization (GO:0007030);; Biological Process: vacuole organization (GO:0007033);; Biological Process: response to salt stress (GO:0009651);; Biological Process: respo…	--	--	[Z]	Cytoskeleton	WD domain, G-beta repeat;; Lipoprotein LpqB beta-propeller domain;; Eukaryotic translation initiation factor eIF2A;; WD40-like Beta Propeller Repeat	Protein Mut11 GN=Mut11 OS=Chlamydomonas reinhardtii (Chlamydomonas smithii) PE=2 SV=1	S	Function unknown	Os01g0125800 [Oryza sativa Japonica Group]
PB.44.1	LOC_Os01g03570.1	--	--	Biological Process: gene silencing by RNA (GO:0031047);;	--	--	--	--	XH domain;; XS domain	Protein INVOLVED IN DE NOVO 2 {ECO:0000303|PubMed:19915591} OS=Arabidopsis thaliana (Mouse-ear cress) PE=1 SV=1	S	Function unknown	putative transcription factor [Oryza sativa Japonica Group]
PB.45.1	LOC_Os01g03660.3	--	--	Molecular Function: DNA binding (GO:0003677);; Molecular Function: chromatin binding (GO:0003682);; Cellular Component: plastid (GO:0009536);;	--	--	--	--	Protein of unknown function (DUF3326)	--	S	Function unknown	PREDICTED: uncharacterized protein LOC101753270 [Setaria italica]
PB.46.1	LOC_Os01g03670.1	[MG]	--	Molecular Function: oxidoreductase activity (GO:0016491);; Biological Process: cellular metabolic process (GO:0044237);; Molecular Function: coenzyme binding (GO:0050662);;	--	--	[V]	Defense mechanisms	NAD dependent epimerase/dehydratase family;; NADH(P)-binding;; 3-beta hydroxysteroid dehydrogenase/isomerase family;; Male sterility protein;; NmrA-like family;; short chain dehydrogenase;; KR domain	Tetraketide alpha-pyrone reductase 2 GN=T26J14.11 OS=Arabidopsis thaliana (Mouse-ear cress) PE=1 SV=1	M	Cell wall/membrane/envelope biogenesis	Os01g0127500 [Oryza sativa Japonica Group]
PB.47.1	LOC_Os01g03680.1	--	--	Molecular Function: serine-type endopeptidase inhibitor activity (GO:0004867);; Cellular Component: extracellular region (GO:0005576);; Biological Process: negative regulation of peptidase activity (GO:0010466);; Cellular Component: cytoplasmic membrane-bounded vesicle (GO:0016023);;	--	--	--	--	Bowman-Birk serine protease inhibitor family	Bowman-Birk type bran trypsin inhibitor (Precursor) GN=RBBI3.3 OS=Oryza sativa subsp. indica (Rice) PE=2 SV=2	S	Function unknown	Os01g0127600 [Oryza sativa Japonica Group]
PB.48.1	PB.48.1	[RTKL]	--	Molecular Function: protein serine/threonine kinase activity (GO:0004674);; Molecular Function: ATP binding (GO:0005524);; Cellular Component: mitochondrion (GO:0005739);; Biological Process: protein phosphorylation (GO:0006468);;	K04733|0|obr:102703262|receptor-like serine/threonine-protein kinase SD1-6-like; K04733 interleukin-1 receptor-associated kinase 4 [EC:2.7.11.1] (A)	--	--	--	Protein tyrosine kinase;; Protein kinase domain	Putative receptor-like protein kinase At4g00960 GN=At4g00960 OS=Arabidopsis thaliana (Mouse-ear cress) PE=3 SV=2	T	Signal transduction mechanisms	PREDICTED: receptor-like serine/threonine-protein kinase SD1-6-like, partial [Oryza brachyantha]
PB.49.1	LOC_Os01g03730.1	--	--	Molecular Function: nucleic acid binding (GO:0003676);; Molecular Function: endonuclease activity (GO:0004519);; Biological Process: DNA catabolic process (GO:0006308);;	--	--	--	--	S1/P1 Nuclease	Endonuclease 4 (Precursor) GN=ENDO4 OS=Arabidopsis thaliana (Mouse-ear cress) PE=3 SV=1	S	Function unknown	Os01g0128200 [Oryza sativa Japonica Group]
PB.50.1	PB.50.1	--	--	--	--	--	[R]	General function prediction only	C2 domain	Synaptotagmin-4 GN=T5K6.90 OS=Arabidopsis thaliana (Mouse-ear cress) PE=2 SV=1	S	Function unknown	hypothetical protein OsI_00239 [Oryza sativa Indica Group]
PB.51.1	LOC_Os01g03950.1	[G]	Carbohydrate transport and metabolism	Molecular Function: xylan 1,4-beta-xylosidase activity (GO:0009044);; Cellular Component: plant-type cell wall (GO:0009505);; Cellular Component: chloroplast (GO:0009507);; Biological Process: xyloglucan metabolic process (GO:0010411);; Cellular Component: cytoplasmic membrane-bounded vesicle (GO:0016023);; Molecular Function: carbohydrate binding (GO:0030246);; Molecular Function: maltose alpha-…	K15925|0|osa:4325976|Os01g0130400; K15925 alpha-D-xyloside xylohydrolase [EC:3.2.1.177] (A)	--	[G]	Carbohydrate transport and metabolism	Glycosyl hydrolases family 31;; Galactose mutarotase-like	Alpha-xylosidase 1 (Precursor) GN=At1g68560 OS=Arabidopsis thaliana (Mouse-ear cress) PE=1 SV=1	G	Carbohydrate transport and metabolism	Os01g0130400 [Oryza sativa Japonica Group]
PB.52.1	LOC_Os01g04010.1	--	--	--	--	--	--	--	--	--	S	Function unknown	hypothetical protein OsI_00252 [Oryza sativa Indica Group]
PB.53.1	LOC_Os01g04020.1	--	--	Molecular Function: DNA binding (GO:0003677);; Molecular Function: sequence-specific DNA binding transcription factor activity (GO:0003700);; Cellular Component: nucleus (GO:0005634);; Biological Process: regulation of transcription, DNA-templated (GO:0006355);;	--	--	--	--	AP2 domain	Ethylene-responsive transcription factor RAP2-2 GN=MLN21.1 OS=Arabidopsis thaliana (Mouse-ear cress) PE=1 SV=2	S	Function unknown	Os01g0131600 [Oryza sativa Japonica Group]
PB.54.1	LOC_Os01g04160.1	--	--	--	--	--	--	--	Domain of unknown function (DUF4378);; DUF761-associated sequence motif	--	S	Function unknown	hypothetical protein OsI_00267 [Oryza sativa Indica Group]
PB.55.1	LOC_Os01g04190.3	[GEPR]	--	Molecular Function: sugar:proton symporter activity (GO:0005351);; Cellular Component: chloroplast envelope (GO:0009941);; Cellular Component: integral component of membrane (GO:0016021);; Biological Process: carbohydrate transmembrane transport (GO:0034219);;	--	--	[R]	General function prediction only	Sugar (and other) transporter;; Major Facilitator Superfamily	Plastidic glucose transporter 4 GN=At5g16150 OS=Arabidopsis thaliana (Mouse-ear cress) PE=1 SV=2	G	Carbohydrate transport and metabolism	Os01g0133400 [Oryza sativa Japonica Group]
PB.56.1	PB.56.1	[R]	General function prediction only	Biological Process: metabolic process (GO:0008152);; Cellular Component: plastid (GO:0009536);; Molecular Function: hydrolase activity (GO:0016787);;	--	--	[R]	General function prediction only	Metallo-beta-lactamase superfamily	--	S	Function unknown	Os01g0133500 [Oryza sativa Japonica Group]
PB.56.2	LOC_Os01g04200.2	[R]	General function prediction only	Biological Process: metabolic process (GO:0008152);; Cellular Component: plastid (GO:0009536);; Molecular Function: hydrolase activity (GO:0016787);;	--	--	[R]	General function prediction only	Metallo-beta-lactamase superfamily	--	S	Function unknown	unknown protein [Oryza sativa Japonica Group]
PB.57.1	LOC_Os01g04260.1	[I]	Lipid transport and metabolism	Molecular Function: C-5 sterol desaturase activity (GO:0000248);; Molecular Function: iron ion binding (GO:0005506);; Biological Process: fatty acid biosynthetic process (GO:0006633);; Cellular Component: integral component of membrane (GO:0016021);; Biological Process: sterol biosynthetic process (GO:0016126);; Biological Process: oxidation-reduction process (GO:0055114);;	K00227|0|osa:4325687|Os01g0134500; K00227 lathosterol oxidase [EC:1.14.21.6] (A)	ko00100:Steroid biosynthesis	[I]	Lipid transport and metabolism	Fatty acid hydroxylase superfamily	Delta(7)-sterol-C5(6)-desaturase OS=Nicotiana tabacum (Common tobacco) PE=2 SV=1	I	Lipid transport and metabolism	Os01g0134500 [Oryza sativa Japonica Group]
PB.58.1	LOC_Os01g04280.1	--	--	--	--	--	--	--	Calmodulin binding protein-like	--	S	Function unknown	Os01g0134700 [Oryza sativa Japonica Group]
PB.59.1	LOC_Os01g04350.1	[O]	Posttranslational modification, protein turnover, chaperones	Biological Process: response to heat (GO:0009408);; Cellular Component: cytoplasmic membrane-bounded vesicle (GO:0016023);;	K13993|3.45989e-82|obr:102717557|17.9 kDa heat shock protein 2-like; K13993 HSP20 family protein (A)	ko04141:Protein processing in endoplasmic reticulum	[O]	Posttranslational modification, protein turnover, chaperones	Hsp20/alpha crystallin family	17.9 kDa heat shock protein 2 GN=P0443D08.1 OS=Oryza sativa subsp. japonica (Rice) PE=2 SV=1	O	Posttranslational modification, protein turnover, chaperones	RecName: Full=17.9 kDa heat shock protein 2; Short=OsHsp17.9B [Oryza sativa Japonica Group]
PB.60.1	LOC_Os01g04380.1	[O]	Posttranslational modification, protein turnover, chaperones	Cellular Component: cytoplasm (GO:0005737);; Biological Process: response to high light intensity (GO:0009644);; Biological Process: heat acclimation (GO:0010286);; Biological Process: response to hydrogen peroxide (GO:0042542);; Biological Process: protein oligomerization (GO:0051259);;	K13993|7.36666e-80|pda:103700494|16.9 kDa class I heat shock protein 2; K13993 HSP20 family protein (A)	ko04141:Protein processing in endoplasmic reticulum	[O]	Posttranslational modification, protein turnover, chaperones	Hsp20/alpha crystallin family	16.9 kDa class I heat shock protein 2 GN=P0443D08.6 OS=Oryza sativa subsp. japonica (Rice) PE=2 SV=1	O	Posttranslational modification, protein turnover, chaperones	Os01g0136200 [Oryza sativa Japonica Group]
PB.61.2	LOC_Os01g04590.1	--	--	Cellular Component: mitochondrion (GO:0005739);;	--	--	--	--	Protein of unknown function (DUF789)	--	S	Function unknown	Os01g0138500 [Oryza sativa Japonica Group]
PB.62.1	PB.62.1	[R]	General function prediction only	Biological Process: glutamine metabolic process (GO:0006541);; Molecular Function: hydrolase activity (GO:0016787);;	--	--	--	--	Peptidase C26;; Glutamine amidotransferase class-I	--	S	Function unknown	Os01g0138800 [Oryza sativa Japonica Group]
PB.63.1	LOC_Os01g04640.1	--	--	Cellular Component: mitochondrion (GO:0005739);; Cellular Component: membrane (GO:0016020);;	--	--	[U]	Intracellular trafficking, secretion, and vesicular transport	Reticulon	Reticulon-like protein B9 GN=RTNLB9 OS=Arabidopsis thaliana (Mouse-ear cress) PE=2 SV=1	U	Intracellular trafficking, secretion, and vesicular transport	Os01g0139000 [Oryza sativa Japonica Group]
PB.64.1	PB.64.1	--	--	Molecular Function: aspartic-type endopeptidase activity (GO:0004190);; Biological Process: proteolysis (GO:0006508);;	--	--	[O]	Posttranslational modification, protein turnover, chaperones	Xylanase inhibitor C-terminal;; Xylanase inhibitor N-terminal;; Eukaryotic aspartyl protease	Protein ASPARTIC PROTEASE IN GUARD CELL 1 (Precursor) GN=ASPG1 OS=Arabidopsis thaliana (Mouse-ear cress) PE=1 SV=1	O	Posttranslational modification, protein turnover, chaperones	Os01g0140100 [Oryza sativa Japonica Group]
PB.64.2	LOC_Os01g04710.1	--	--	Molecular Function: aspartic-type endopeptidase activity (GO:0004190);; Biological Process: proteolysis (GO:0006508);;	--	--	[O]	Posttranslational modification, protein turnover, chaperones	Xylanase inhibitor C-terminal;; Xylanase inhibitor N-terminal;; Eukaryotic aspartyl protease	Protein ASPARTIC PROTEASE IN GUARD CELL 1 (Precursor) GN=ASPG1 OS=Arabidopsis thaliana (Mouse-ear cress) PE=1 SV=1	O	Posttranslational modification, protein turnover, chaperones	hypothetical protein OsI_00323 [Oryza sativa Indica Group]
PB.65.1	LOC_Os01g04720.1	--	--	Cellular Component: endosome (GO:0005768);; Cellular Component: vacuole (GO:0005773);; Cellular Component: Golgi apparatus (GO:0005794);; Cellular Component: trans-Golgi network (GO:0005802);; Cellular Component: plasma membrane (GO:0005886);; Cellular Component: cytoplasmic membrane-bounded vesicle (GO:0016023);; Molecular Function: kinase activity (GO:0016301);; Biological Process: phosphorylat…	--	--	[R]	General function prediction only	Carbohydrate-binding protein of the ER;; Di-glucose binding within endoplasmic reticulum;; Leucine Rich Repeat	Receptor-like protein kinase At5g59670 (Precursor) GN=At5g59670 OS=Arabidopsis thaliana (Mouse-ear cress) PE=1 SV=1	S	Function unknown	Os01g0140400 [Oryza sativa Japonica Group]
PB.66.1	PB.66.1	[J]	Translation, ribosomal structure and biogenesis	Molecular Function: structural constituent of ribosome (GO:0003735);; Cellular Component: mitochondrion (GO:0005739);; Biological Process: translation (GO:0006412);; Cellular Component: large ribosomal subunit (GO:0015934);;	K02898|1.49618e-68|osa:4351513|Os12g0150100; K02898 large subunit ribosomal protein L26e (A)	ko03010:Ribosome	[J]	Translation, ribosomal structure and biogenesis	KOW motif	60S ribosomal protein L26-1 GN=RPL26A OS=Arabidopsis thaliana (Mouse-ear cress) PE=2 SV=2	J	Translation, ribosomal structure and biogenesis	unnamed protein product [Triticum aestivum]
PB.67.1	LOC_Os01g04800.1	--	--	Molecular Function: DNA binding (GO:0003677);; Molecular Function: sequence-specific DNA binding transcription factor activity (GO:0003700);; Cellular Component: nucleus (GO:0005634);; Biological Process: regulation of transcription, DNA-templated (GO:0006355);; Cellular Component: plastid (GO:0009536);; Biological Process: response to brassinosteroid (GO:0009741);; Biological Process: negative r…	--	--	--	--	B3 DNA binding domain;; AP2 domain	AP2/ERF and B3 domain-containing protein Os01g0141000 OS=Oryza sativa subsp. japonica (Rice) PE=2 SV=1	K	Transcription	Os01g0141000 [Oryza sativa Japonica Group]
PB.68.1	LOC_Os01g04880.1	--	--	Cellular Component: cytoplasmic membrane-bounded vesicle (GO:0016023);;	--	--	--	--	--	--	S	Function unknown	hypothetical protein OsJ_00321 [Oryza sativa Japonica Group]
PB.69.1	LOC_Os01g04910.1	--	--	Cellular Component: nucleus (GO:0005634);; Cellular Component: cytosol (GO:0005829);;	K15901|2.07769e-123|osa:4325487|Os01g0142200; K15901 EKC/KEOPS complex subunit CGI121/TPRKB (A)	--	[S]	Function unknown	Kinase binding protein CGI-121	--	S	Function unknown	Os01g0142200 [Oryza sativa Japonica Group]
PB.70.1	LOC_Os01g04920.1	[M]	Cell wall/membrane/envelope biogenesis	Biological Process: glycolipid biosynthetic process (GO:0009247);; Cellular Component: chloroplast envelope (GO:0009941);; Biological Process: cellular response to phosphate starvation (GO:0016036);; Molecular Function: UDP-sulfoquinovose:DAG sulfoquinovosyltransferase activity (GO:0046510);;	K06119|0|osa:4325452|Os01g0142300; K06119 sulfoquinovosyltransferase [EC:2.4.1.-] (A)	ko00561:Glycerolipid metabolism	[MOI]	--	Glycosyl transferases group 1;; Glycosyl transferase 4-like domain;; Glycosyl transferases group 1;; Glycosyltransferase Family 4;; Glycosyl transferases group 1;; Glycosyl transferase 4-like	--	M	Cell wall/membrane/envelope biogenesis	Os01g0142300 [Oryza sativa Japonica Group]
PB.71.1	LOC_Os01g04950.1	[E]	Amino acid transport and metabolism	Cellular Component: plasma membrane (GO:0005886);; Biological Process: nitrogen compound metabolic process (GO:0006807);; Biological Process: pollen tube growth (GO:0009860);; Cellular Component: integral component of membrane (GO:0016021);; Molecular Function: dipeptide transporter activity (GO:0042936);; Molecular Function: tripeptide transporter activity (GO:0042937);; Biological Process: dipe…	K14638|0|osa:4325456|Os01g0142800; K14638 solute carrier family 15 (peptide/histidine transporter), member 3/4 (A)	--	[E]	Amino acid transport and metabolism	POT family;; Major Facilitator Superfamily	Protein NRT1/ PTR FAMILY 8.1 GN=F24B22.100 OS=Arabidopsis thaliana (Mouse-ear cress) PE=1 SV=1	E	Amino acid transport and metabolism	Os01g0142800 [Oryza sativa Japonica Group]
PB.72.1	LOC_Os01g05140.1	--	--	Cellular Component: plastid (GO:0009536);;	--	--	--	--	--	--	S	Function unknown	Os01g0144700 [Oryza sativa Japonica Group]
PB.73.1	LOC_Os01g05420.1	[S]	Function unknown	Molecular Function: DNA binding (GO:0003677);; Cellular Component: nucleus (GO:0005634);; Biological Process: protein N-linked glycosylation (GO:0006487);; Biological Process: protein targeting to vacuole (GO:0006623);; Biological Process: membrane fusion (GO:0006944);; Biological Process: systemic acquired resistance (GO:0009627);; Biological Process: salicylic acid biosynthetic process (GO:0009…	K17498|0|osa:4325206|Os01g0147200; K17498 transcription factor SPN1 (A)	--	[S]	Function unknown	TFIIS helical bundle-like domain	--	S	Function unknown	Os01g0147200 [Oryza sativa Japonica Group]
PB.73.2	LOC_Os01g05420.1	[S]	Function unknown	Molecular Function: DNA binding (GO:0003677);; Cellular Component: nucleus (GO:0005634);; Biological Process: protein N-linked glycosylation (GO:0006487);; Biological Process: protein targeting to vacuole (GO:0006623);; Biological Process: membrane fusion (GO:0006944);; Biological Process: systemic acquired resistance (GO:0009627);; Biological Process: salicylic acid biosynthetic process (GO:0009…	K17498|0|osa:4325206|Os01g0147200; K17498 transcription factor SPN1 (A)	--	[S]	Function unknown	TFIIS helical bundle-like domain	--	S	Function unknown	Os01g0147200 [Oryza sativa Japonica Group]
PB.74.1	LOC_Os01g05500.2	--	--	Molecular Function: ubiquitin-protein transferase activity (GO:0004842);; Biological Process: ubiquitin-dependent protein catabolic process (GO:0006511);; Molecular Function: zinc ion binding (GO:0008270);; Biological Process: response to abscisic acid (GO:0009737);; Biological Process: regulation of seed germination (GO:0010029);; Biological Process: protein ubiquitination (GO:0016567);; Biologi…	K11978|0|obr:102715978|E3 ubiquitin-protein ligase UBR3-like; K11978 E3 ubiquitin-protein ligase UBR3 [EC:6.3.2.19] (A)	--	[O]	Posttranslational modification, protein turnover, chaperones	Putative zinc finger in N-recognin (UBR box)	--	O	Posttranslational modification, protein turnover, chaperones	hypothetical protein OsI_00390 [Oryza sativa Indica Group]
PB.75.1	PB.75.1	--	--	--	--	--	--	--	Protein of unknown function (DUF1668);; Protein of unknown function (DUF1668)	--	S	Function unknown	Os01g0148700 [Oryza sativa Japonica Group]
PB.76.1	LOC_Os01g05610.1	--	--	Cellular Component: nucleosome (GO:0000786);; Molecular Function: DNA binding (GO:0003677);; Cellular Component: nucleolus (GO:0005730);; Biological Process: nucleosome assembly (GO:0006334);; Cellular Component: chloroplast (GO:0009507);; Molecular Function: protein heterodimerization activity (GO:0046982);;	K11252|4.60457e-59|osa:4324495|Os01g0152300; K11252 histone H2B (A)	--	[B]	Chromatin structure and dynamics	Core histone H2A/H2B/H3/H4	Histone H2B.10 GN=H2B.10 OS=Oryza sativa subsp. indica (Rice) PE=3 SV=1	B	Chromatin structure and dynamics	RecName: Full=Histone H2B.10 [Oryza sativa Indica Group]
PB.77.1	PB.77.1	[O]	Posttranslational modification, protein turnover, chaperones	Molecular Function: CAAX-protein geranylgeranyltransferase activity (GO:0004662);; Cellular Component: CAAX-protein geranylgeranyltransferase complex (GO:0005953);; Biological Process: response to water deprivation (GO:0009414);; Biological Process: response to auxin (GO:0009733);; Biological Process: negative regulation of abscisic acid-activated signaling pathway (GO:0009788);; Biological Proce…	K11713|2.90739e-102|dosa:Os01t0150100-01|Os01g0150100; Similar to Geranylgeranyltransferase type I beta subunit.; K11713 geranylgeranyl transferase type-1 subunit beta [EC:2.5.1.59] (A)	--	[O]	Posttranslational modification, protein turnover, chaperones	Prenyltransferase and squalene oxidase repeat;; Prenyltransferase-like;; Prenyltransferase and squalene oxidase repeat	Geranylgeranyl transferase type-1 subunit beta GN=F12L6 OS=Arabidopsis thaliana (Mouse-ear cress) PE=1 SV=1	O	Posttranslational modification, protein turnover, chaperones	hypothetical protein OsI_00411 [Oryza sativa Indica Group]
PB.77.2	PB.77.2	[O]	Posttranslational modification, protein turnover, chaperones	Molecular Function: CAAX-protein geranylgeranyltransferase activity (GO:0004662);; Cellular Component: CAAX-protein geranylgeranyltransferase complex (GO:0005953);; Biological Process: response to water deprivation (GO:0009414);; Biological Process: response to auxin (GO:0009733);; Biological Process: negative regulation of abscisic acid-activated signaling pathway (GO:0009788);; Biological Proce…	K11713|0|obr:102716363|geranylgeranyl transferase type-1 subunit beta-like; K11713 geranylgeranyl transferase type-1 subunit beta [EC:2.5.1.59] (A)	--	[O]	Posttranslational modification, protein turnover, chaperones	Prenyltransferase and squalene oxidase repeat;; Prenyltransferase-like;; Prenyltransferase-like	Geranylgeranyl transferase type-1 subunit beta GN=F12L6 OS=Arabidopsis thaliana (Mouse-ear cress) PE=1 SV=1	O	Posttranslational modification, protein turnover, chaperones	hypothetical protein OsI_00411 [Oryza sativa Indica Group]
PB.78.1	PB.78.1	--	--	Biological Process: polysaccharide biosynthetic process (GO:0000271);; Molecular Function: protein tyrosine phosphatase activity (GO:0004725);; Cellular Component: nucleus (GO:0005634);; Cellular Component: cytosol (GO:0005829);; Biological Process: multidimensional cell growth (GO:0009825);; Cellular Component: fatty acid elongase complex (GO:0009923);; Biological Process: cell tip growth (GO:00…	K10703|1.31045e-88|osa:4335343|Os04g0271200; K10703 very-long-chain (3R)-3-hydroxyacyl-CoA dehydratase [EC:4.2.1.134] (A)	ko00062:Fatty acid elongation;ko01040:Biosynthesis of unsaturated fatty acids;ko01212:Fatty acid metabolism	[R]	General function prediction only	Protein tyrosine phosphatase-like protein, PTPLA	Very-long-chain (3R)-3-hydroxyacyl-CoA dehydratase PASTICCINO 2A OS=Oryza sativa subsp. japonica (Rice) PE=2 SV=2	S	Function unknown	Os04g0271200 [Oryza sativa Japonica Group]
PB.79.1	LOC_Os01g05790.1	--	--	Cellular Component: chloroplast envelope (GO:0009941);; Cellular Component: integral component of membrane (GO:0016021);; Biological Process: hyperosmotic salinity response (GO:0042538);; Biological Process: protein insertion into membrane (GO:0051205);;	--	--	--	--	--	--	S	Function unknown	Os01g0151100 [Oryza sativa Japonica Group]
PB.80.1	LOC_Os01g05800.1	[U]	Intracellular trafficking, secretion, and vesicular transport	Biological Process: rRNA processing (GO:0006364);; Cellular Component: chloroplast thylakoid membrane (GO:0009535);; Biological Process: chloroplast relocation (GO:0009902);; Cellular Component: chloroplast envelope (GO:0009941);; Biological Process: thylakoid membrane organization (GO:0010027);; Biological Process: photosystem II assembly (GO:0010207);; Molecular Function: P-P-bond-hydrolysis-dr…	K03217|0|osa:4324524|Os01g0151200; K03217 YidC/Oxa1 family membrane protein insertase (A)	ko03060:Protein export	[OU]	--	60Kd inner membrane protein	Inner membrane protein ALBINO3, chloroplastic (Precursor) GN=ALB3 OS=Arabidopsis thaliana (Mouse-ear cress) PE=1 SV=2	U	Intracellular trafficking, secretion, and vesicular transport	hypothetical protein OsI_00422 [Oryza sativa Indica Group]
PB.81.1	LOC_Os01g05830.1	--	--	Cellular Component: nucleus (GO:0005634);; Cellular Component: endoplasmic reticulum (GO:0005783);;	--	--	--	--	--	--	S	Function unknown	Os01g0151600 [Oryza sativa Japonica Group]
PB.82.1	LOC_Os01g05840.2	[IQR]	--	Biological Process: pollen tube growth (GO:0009860);; Molecular Function: oxidoreductase activity (GO:0016491);; Biological Process: oxidation-reduction process (GO:0055114);;	--	--	[Q]	Secondary metabolites biosynthesis, transport and catabolism	short chain dehydrogenase;; KR domain	Short-chain dehydrogenase TIC 32, chloroplastic GN=TIC32 OS=Arabidopsis thaliana (Mouse-ear cress) PE=2 SV=1	S	Function unknown	Os01g0151700 [Oryza sativa Japonica Group]
PB.83.1	LOC_Os01g06010.1	--	--	Cellular Component: nucleosome (GO:0000786);; Molecular Function: DNA binding (GO:0003677);; Cellular Component: nucleolus (GO:0005730);; Biological Process: nucleosome assembly (GO:0006334);; Cellular Component: chloroplast (GO:0009507);; Molecular Function: protein heterodimerization activity (GO:0046982);;	K11252|2.41408e-49|bdi:100837970|histone H2B.1-like; K11252 histone H2B (A)	--	[B]	Chromatin structure and dynamics	Core histone H2A/H2B/H3/H4;; Histone-like transcription factor (CBF/NF-Y) and archaeal histone	Histone H2B.4 OS=Oryza sativa subsp. japonica (Rice) PE=3 SV=1	B	Chromatin structure and dynamics	predicted protein [Hordeum vulgare subsp. vulgare]
PB.84.1	LOC_Os01g06310.1	--	--	--	--	--	--	--	--	--	--	--	hypothetical protein OsI_00467 [Oryza sativa Indica Group]
PB.85.1	LOC_Os01g06460.1	--	--	Biological Process: N-terminal protein myristoylation (GO:0006499);; Biological Process: amino acid transport (GO:0006865);; Biological Process: response to chitin (GO:0010200);; Cellular Component: integral component of membrane (GO:0016021);;	--	--	--	--	PLAC8 family	Cell number regulator 8 GN=CNR8 OS=Zea mays (Maize) PE=2 SV=1	S	Function unknown	Os01g0157900 [Oryza sativa Japonica Group]
PB.86.1	PB.86.1	--	--	Biological Process: mitotic cell cycle (GO:0000278);; Cellular Component: nucleus (GO:0005634);; Cellular Component: cytosol (GO:0005829);; Biological Process: RNA processing (GO:0006396);; Biological Process: protein import into nucleus (GO:0006606);; Molecular Function: protein transporter activity (GO:0008565);; Biological Process: response to xenobiotic stimulus (GO:0009410);; Cellular Compon…	--	--	[U]	Intracellular trafficking, secretion, and vesicular transport	Armadillo/beta-catenin-like repeat;; HEAT repeats;; HEAT-like repeat;; HEAT repeat	Importin subunit alpha-2 OS=Oryza sativa subsp. japonica (Rice) PE=2 SV=1	U	Intracellular trafficking, secretion, and vesicular transport	hypothetical protein OsI_00484 [Oryza sativa Indica Group]
PB.87.1	LOC_Os01g06490.1	[E]	Amino acid transport and metabolism	Molecular Function: serine-type carboxypeptidase activity (GO:0004185);; Cellular Component: vacuole (GO:0005773);; Biological Process: proteolysis (GO:0006508);; Cellular Component: cytoplasmic membrane-bounded vesicle (GO:0016023);;	K16297|0|osa:4324053|Os01g0158200; K16297 serine carboxypeptidase-like clade II [EC:3.4.16.-] (A)	--	[OE]	--	Serine carboxypeptidase;; Alpha/beta hydrolase family	Serine carboxypeptidase 2 chain B (Precursor) GN=CBP2 OS=Triticum aestivum (Wheat) PE=1 SV=2	E	Amino acid transport and metabolism	Os01g0158200 [Oryza sativa Japonica Group]
PB.88.1	LOC_Os01g07070.1	--	--	Molecular Function: nucleotide binding (GO:0000166);; Molecular Function: nucleic acid binding (GO:0003676);; Molecular Function: zinc ion binding (GO:0008270);; Cellular Component: chloroplast (GO:0009507);;	K13098|4.68899e-83|osa:4324412|Os01g0164400; K13098 RNA-binding protein FUS (A)	--	[R]	General function prediction only	Zn-finger in Ran binding protein and others;; RNA recognition motif. (a.k.a. RRM, RBD, or RNP domain);; RNA recognition motif (a.k.a. RRM, RBD, or RNP domain)	Transcription initiation factor TFIID subunit 15b GN=TAF15B OS=Arabidopsis thaliana (Mouse-ear cress) PE=1 SV=1	S	Function unknown	hypothetical protein OsI_00526 [Oryza sativa Indica Group]
PB.89.1	LOC_Os01g07120.1	--	--	Molecular Function: DNA binding (GO:0003677);; Molecular Function: sequence-specific DNA binding transcription factor activity (GO:0003700);; Cellular Component: nucleus (GO:0005634);; Biological Process: response to salt stress (GO:0009651);; Biological Process: positive regulation of transcription, DNA-templated (GO:0045893);;	--	--	--	--	AP2 domain	Dehydration-responsive element-binding protein 2A OS=Oryza sativa subsp. japonica (Rice) PE=2 SV=1	K	Transcription	DREB1 [Oryza sativa]
PB.90.1	LOC_Os01g07200.1	[L]	Replication, recombination and repair	Molecular Function: nucleic acid binding (GO:0003676);; Molecular Function: nuclease activity (GO:0004518);; Biological Process: nucleic acid phosphodiester bond hydrolysis (GO:0090305);;	--	--	--	--	Staphylococcal nuclease homologue	Probable staphylococcal-like nuclease CAN1 OS=Oryza sativa subsp. japonica (Rice) PE=2 SV=1	L	Replication, recombination and repair	Os01g0166100 [Oryza sativa Japonica Group]
PB.91.1	LOC_Os01g07250.1	--	--	Cellular Component: lysosome (GO:0005764);; Biological Process: sphingolipid metabolic process (GO:0006665);; Cellular Component: cytoplasmic membrane-bounded vesicle (GO:0016023);;	K12382|8.95561e-153|osa:4327145|Os01g0166700; K12382 saposin (A)	--	[IG]	--	Saposin-like type B, region 1;; Saposin-like type B, region 2	--	O	Posttranslational modification, protein turnover, chaperones	Os01g0166700 [Oryza sativa Japonica Group]
PB.92.1	PB.92.1	--	--	Cellular Component: cytoplasmic membrane-bounded vesicle (GO:0016023);;	--	--	[R]	General function prediction only	--	Receptor-like protein 12 (Precursor) GN=RLP12 OS=Arabidopsis thaliana (Mouse-ear cress) PE=2 SV=2	S	Function unknown	hypothetical protein OsJ_00513 [Oryza sativa Japonica Group]
PB.93.1	LOC_Os01g07400.1	[R]	General function prediction only	Biological Process: autophagic vacuole assembly (GO:0000045);; Cellular Component: cytoplasm (GO:0005737);; Molecular Function: zinc ion binding (GO:0008270);; Molecular Function: phosphatidylinositol-3-phosphate binding (GO:0032266);; Molecular Function: phosphatidylinositol-3,5-bisphosphate binding (GO:0080025);;	--	--	[S]	Function unknown	WD domain, G-beta repeat;; CPSF A subunit region	Autophagy-related protein 18d GN=ATG18D OS=Arabidopsis thaliana (Mouse-ear cress) PE=2 SV=1	S	Function unknown	Os01g0168500 [Oryza sativa Japonica Group]
PB.93.2	LOC_Os01g07400.1	[R]	General function prediction only	Biological Process: autophagic vacuole assembly (GO:0000045);; Cellular Component: cytoplasm (GO:0005737);; Molecular Function: zinc ion binding (GO:0008270);; Molecular Function: phosphatidylinositol-3-phosphate binding (GO:0032266);; Molecular Function: phosphatidylinositol-3,5-bisphosphate binding (GO:0080025);;	--	--	[S]	Function unknown	WD domain, G-beta repeat;; CPSF A subunit region	Autophagy-related protein 18d GN=ATG18D OS=Arabidopsis thaliana (Mouse-ear cress) PE=2 SV=1	S	Function unknown	Os01g0168500 [Oryza sativa Japonica Group]
PB.93.3	PB.93.3	[R]	General function prediction only	Biological Process: autophagic vacuole assembly (GO:0000045);; Cellular Component: cytoplasm (GO:0005737);; Molecular Function: zinc ion binding (GO:0008270);; Molecular Function: phosphatidylinositol-3-phosphate binding (GO:0032266);; Molecular Function: phosphatidylinositol-3,5-bisphosphate binding (GO:0080025);;	--	--	[S]	Function unknown	WD domain, G-beta repeat	Autophagy-related protein 18d GN=ATG18D OS=Arabidopsis thaliana (Mouse-ear cress) PE=2 SV=1	S	Function unknown	Os01g0168500 [Oryza sativa Japonica Group]
PB.94.1	LOC_Os01g07780.1	--	--	Cellular Component: cytoplasmic membrane-bounded vesicle (GO:0016023);;	--	--	--	--	Embryo-specific protein 3, (ATS3)	--	S	Function unknown	Os01g0172800 [Oryza sativa Japonica Group]
PB.95.1	PB.95.1	[O]	Posttranslational modification, protein turnover, chaperones	Cellular Component: mitochondrion (GO:0005739);; Molecular Function: electron carrier activity (GO:0009055);; Molecular Function: protein disulfide oxidoreductase activity (GO:0015035);; Biological Process: cell redox homeostasis (GO:0045454);; Molecular Function: metal ion binding (GO:0046872);; Biological Process: anther development (GO:0048653);; Molecular Function: 2 iron, 2 sulfur cluster bi…	K07390|7.12294e-103|osa:4327130|Os01g0174900; K07390 monothiol glutaredoxin (A)	--	[O]	Posttranslational modification, protein turnover, chaperones	Glutaredoxin	Monothiol glutaredoxin-S1, mitochondrial (Precursor) GN=OSJNBa0089K24.28 OS=Oryza sativa subsp. japonica (Rice) PE=2 SV=2	O	Posttranslational modification, protein turnover, chaperones	Os01g0174900 [Oryza sativa Japonica Group]
PB.96.1	PB.96.1	[R]	General function prediction only	--	--	--	[R]	General function prediction only	WD domain, G-beta repeat;; LisH	Transcriptional corepressor LEUNIG GN=LUG OS=Arabidopsis thaliana (Mouse-ear cress) PE=1 SV=2	S	Function unknown	putative transcriptional corepressor LEUNIG [Oryza sativa Japonica Group]
PB.97.1	LOC_Os01g08200.1	[O]	Posttranslational modification, protein turnover, chaperones	Molecular Function: ubiquitin thiolesterase activity (GO:0004221);; Molecular Function: ubiquitin-specific protease activity (GO:0004843);; Cellular Component: cytosol (GO:0005829);; Biological Process: ubiquitin-dependent protein catabolic process (GO:0006511);; Molecular Function: omega peptidase activity (GO:0008242);; Molecular Function: zinc ion binding (GO:0008270);; Biological Process: emb…	K11836|0|dosa:Os01t0177200-01|Os01g0177200; Similar to Ubiquitin-specific protease 14.; K11836 ubiquitin carboxyl-terminal hydrolase 5/13 [EC:3.4.19.12] (A)	--	[O]	Posttranslational modification, protein turnover, chaperones	Ubiquitin carboxyl-terminal hydrolase;; UBA/TS-N domain;; Zn-finger in ubiquitin-hydrolases and other protein;; Ubiquitin carboxyl-terminal hydrolase	Ubiquitin carboxyl-terminal hydrolase 14 OS=Arabidopsis thaliana (Mouse-ear cress) PE=1 SV=1	O	Posttranslational modification, protein turnover, chaperones	Os01g0177200 [Oryza sativa Japonica Group]
PB.97.2	LOC_Os01g08200.1	[O]	Posttranslational modification, protein turnover, chaperones	Molecular Function: ubiquitin thiolesterase activity (GO:0004221);; Molecular Function: ubiquitin-specific protease activity (GO:0004843);; Cellular Component: cytosol (GO:0005829);; Biological Process: ubiquitin-dependent protein catabolic process (GO:0006511);; Molecular Function: omega peptidase activity (GO:0008242);; Molecular Function: zinc ion binding (GO:0008270);; Biological Process: emb…	K11836|0|dosa:Os01t0177200-01|Os01g0177200; Similar to Ubiquitin-specific protease 14.; K11836 ubiquitin carboxyl-terminal hydrolase 5/13 [EC:3.4.19.12] (A)	--	[O]	Posttranslational modification, protein turnover, chaperones	Ubiquitin carboxyl-terminal hydrolase;; UBA/TS-N domain;; Zn-finger in ubiquitin-hydrolases and other protein;; Ubiquitin carboxyl-terminal hydrolase	Ubiquitin carboxyl-terminal hydrolase 14 OS=Arabidopsis thaliana (Mouse-ear cress) PE=1 SV=1	O	Posttranslational modification, protein turnover, chaperones	Os01g0177200 [Oryza sativa Japonica Group]
PB.98.1	LOC_Os01g08400.1	--	--	Molecular Function: SNAP receptor activity (GO:0005484);; Biological Process: intracellular protein transport (GO:0006886);; Biological Process: membrane fusion (GO:0006944);; Cellular Component: membrane (GO:0016020);; Biological Process: vesicle-mediated transport (GO:0016192);;	K08490|0|dosa:Os01t0179200-01|Os01g0179200; Syntaxin, N-terminal domain containing protein.; K08490 syntaxin 5 (A)	ko04130:SNARE interactions in vesicular transport	[U]	Intracellular trafficking, secretion, and vesicular transport	SNARE domain;; Syntaxin	Syntaxin-32 GN=SYP32 OS=Arabidopsis thaliana (Mouse-ear cress) PE=2 SV=1	U	Intracellular trafficking, secretion, and vesicular transport	Os01g0179200 [Oryza sativa Japonica Group]
PB.99.1	LOC_Os01g08410.1	--	--	Molecular Function: copper ion binding (GO:0005507);;	--	--	--	--	--	--	S	Function unknown	Os01g0179300 [Oryza sativa Japonica Group]
PB.100.1	LOC_Os01g08420.1	--	--	Cellular Component: plastid (GO:0009536);; Biological Process: gravitropism (GO:0009630);; Biological Process: embryo development ending in seed dormancy (GO:0009793);; Cellular Component: apoplast (GO:0048046);;	--	--	--	--	Family of unknown function (DUF490)	--	S	Function unknown	Os01g0179400 [Oryza sativa Japonica Group]
PB.101.1	LOC_Os01g08430.1	--	--	Biological Process: virus induced gene silencing (GO:0009616);; Biological Process: vegetative phase change (GO:0010050);; Biological Process: production of ta-siRNAs involved in RNA interference (GO:0010267);; Biological Process: production of miRNAs involved in gene silencing by miRNA (GO:0035196);;	--	--	--	--	Enhancer of polycomb-like	Histone-lysine N-methyltransferase ATX2 GN=T20M3.10 OS=Arabidopsis thaliana (Mouse-ear cress) PE=2 SV=1	S	Function unknown	hypothetical protein OsJ_00612 [Oryza sativa Japonica Group]
PB.102.1	LOC_Os01g08560.1	[O]	Posttranslational modification, protein turnover, chaperones	Molecular Function: ATP binding (GO:0005524);; Cellular Component: cell wall (GO:0005618);; Cellular Component: plasma membrane (GO:0005886);; Biological Process: response to heat (GO:0009408);; Biological Process: response to cadmium ion (GO:0046686);;	K09489|0|osa:4325355|Os01g0180800; K09489 heat shock 70kDa protein 4 (A)	--	[O]	Posttranslational modification, protein turnover, chaperones	Hsp70 protein	Heat shock 70 kDa protein 15 GN=HSP70-15 OS=Arabidopsis thaliana (Mouse-ear cress) PE=1 SV=1	O	Posttranslational modification, protein turnover, chaperones	Os01g0180800 [Oryza sativa Japonica Group]
PB.103.1	LOC_Os01g08650.1	--	--	Cellular Component: plastid (GO:0009536);;	--	--	--	--	Protein of unknown function (DUF1618)	--	S	Function unknown	Os01g0182100 [Oryza sativa Japonica Group]
PB.104.1	LOC_Os01g08750.3	--	--	--	--	--	[S]	Function unknown	Spatacsin C-terminus	--	S	Function unknown	hypothetical protein OsJ_00643 [Oryza sativa Japonica Group]
PB.104.2	LOC_Os01g08750.3	--	--	--	--	--	[S]	Function unknown	Spatacsin C-terminus	--	S	Function unknown	hypothetical protein OsJ_00643 [Oryza sativa Japonica Group]
PB.105.1	LOC_Os01g08770.1	[R]	General function prediction only	Molecular Function: nucleotide binding (GO:0000166);; Biological Process: pyrimidine ribonucleotide biosynthetic process (GO:0009220);; Cellular Component: Cul4-RING E3 ubiquitin ligase complex (GO:0080008);;	K14768|0|osa:4325333|Os01g0183100; K14768 U3 small nucleolar RNA-associated protein 7 (A)	--	[A]	RNA processing and modification	BING4CT (NUC141) domain;; WD domain, G-beta repeat	--	S	Function unknown	Os01g0183100 [Oryza sativa Japonica Group]
PB.105.2	LOC_Os01g08770.1	[R]	General function prediction only	Molecular Function: nucleotide binding (GO:0000166);; Biological Process: pyrimidine ribonucleotide biosynthetic process (GO:0009220);; Cellular Component: Cul4-RING E3 ubiquitin ligase complex (GO:0080008);;	K14768|0|osa:4325333|Os01g0183100; K14768 U3 small nucleolar RNA-associated protein 7 (A)	--	[A]	RNA processing and modification	BING4CT (NUC141) domain;; WD domain, G-beta repeat	--	S	Function unknown	Os01g0183100 [Oryza sativa Japonica Group]
PB.105.3	PB.105.3	[R]	General function prediction only	Molecular Function: nucleotide binding (GO:0000166);; Biological Process: pyrimidine ribonucleotide biosynthetic process (GO:0009220);; Cellular Component: Cul4-RING E3 ubiquitin ligase complex (GO:0080008);;	K14768|0|osa:4325333|Os01g0183100; K14768 U3 small nucleolar RNA-associated protein 7 (A)	--	[A]	RNA processing and modification	BING4CT (NUC141) domain	--	S	Function unknown	hypothetical protein OsI_00668 [Oryza sativa Indica Group]
PB.106.1	LOC_Os01g08800.1	[Q]	Secondary metabolites biosynthesis, transport and catabolism	Molecular Function: monooxygenase activity (GO:0004497);; Molecular Function: iron ion binding (GO:0005506);; Molecular Function: electron carrier activity (GO:0009055);; Cellular Component: cytoplasmic membrane-bounded vesicle (GO:0016023);; Molecular Function: oxidoreductase activity, acting on paired donors, with incorporation or reduction of molecular oxygen (GO:0016705);; Molecular Function:…	--	--	[QI]	--	Cytochrome P450	Cytochrome P450 86B1 GN=CYP86B1 OS=Arabidopsis thaliana (Mouse-ear cress) PE=2 SV=1	Q	Secondary metabolites biosynthesis, transport and catabolism	putative cytochrome P450 [Oryza sativa Japonica Group]
PB.107.1	LOC_Os01g08970.1	[KLB]	--	Molecular Function: DNA binding (GO:0003677);; Cellular Component: nuclear euchromatin (GO:0005719);; Biological Process: DNA replication (GO:0006260);; Biological Process: DNA repair (GO:0006281);; Biological Process: regulation of transcription, DNA-templated (GO:0006355);; Biological Process: vegetative to reproductive phase transition of meristem (GO:0010228);; Cellular Component: FACT comple…	K09272|0|osa:4325652|Os01g0184900; K09272 structure-specific recognition protein 1 (A)	--	[KLB]	--	Structure-specific recognition protein (SSRP1);; Histone chaperone Rttp106-like;; HMG (high mobility group) box;; HMG-box domain	FACT complex subunit SSRP1-A OS=Oryza sativa subsp. japonica (Rice) PE=2 SV=1	B	Chromatin structure and dynamics	early drought induced protein [Oryza sativa Indica Group]
PB.108.1	LOC_Os01g09010.1	--	--	Molecular Function: transferase activity, transferring acyl groups other than amino-acyl groups (GO:0016747);;	--	--	--	--	Transferase family	3&apos;-N-debenzoyl-2&apos;-deoxytaxol N-benzoyltransferase GN=TAX10 OS=Taxus canadensis (Canadian yew) PE=1 SV=1	S	Function unknown	Os01g0185300 [Oryza sativa Japonica Group]
PB.109.1	LOC_Os01g09030.1	--	--	Molecular Function: cysteamine dioxygenase activity (GO:0047800);; Biological Process: oxidation-reduction process (GO:0055114);;	K10712|6.3497e-138|dosa:Os01t0185500-00|Os01g0185500; Protein of unknown function DUF1637 domain containing protein.; K10712 cysteamine dioxygenase [EC:1.13.11.19] (A)	ko00430:Taurine and hypotaurine metabolism	[S]	Function unknown	Protein of unknown function (DUF1637)	--	S	Function unknown	unknown protein [Oryza sativa Japonica Group]
PB.110.1	PB.110.1	--	--	Cellular Component: plasma membrane (GO:0005886);; Cellular Component: chloroplast (GO:0009507);;	--	--	[L]	Replication, recombination and repair	DDE superfamily endonuclease	--	S	Function unknown	unnamed protein product [Oryza sativa Japonica Group]
PB.111.1	LOC_Os01g09246.1	--	--	Cellular Component: vacuole (GO:0005773);; Cellular Component: membrane (GO:0016020);;	--	--	--	--	--	--	S	Function unknown	Os01g0187400 [Oryza sativa Japonica Group]
PB.112.1	LOC_Os01g09252.1	[R]	General function prediction only	Cellular Component: vacuole (GO:0005773);; Cellular Component: membrane (GO:0016020);;	--	--	[R]	General function prediction only	WD domain, G-beta repeat;; PQQ-like domain	Zinc finger CCCH domain-containing protein 17 OS=Oryza sativa subsp. japonica (Rice) PE=2 SV=2	S	Function unknown	unnamed protein product [Oryza sativa Japonica Group]
PB.113.1	PB.113.1	[R]	General function prediction only	Molecular Function: iron ion binding (GO:0005506);; Molecular Function: oxidoreductase activity, acting on paired donors, with incorporation or reduction of molecular oxygen, 2-oxoglutarate as one donor, and incorporation of one atom each of oxygen into both donors (GO:0016706);; Biological Process: oxidation-reduction process (GO:0055114);;	K06892|0|dosa:Os01t0188100-01|Os01g0188100; Isopenicillin N synthase family protein.; K06892 feruloyl-CoA ortho-hydroxylase [EC:1.14.11.-] (A)	--	[QR]	--	non-haem dioxygenase in morphine synthesis N-terminal;; 2OG-Fe(II) oxygenase superfamily	Probable 2-oxoglutarate-dependent dioxygenase At3g49630 GN=At3g50210 OS=Arabidopsis thaliana (Mouse-ear cress) PE=2 SV=1	S	Function unknown	hypothetical protein OsI_00710 [Oryza sativa Indica Group]
PB.114.1	LOC_Os01g09430.1	--	--	Cellular Component: nucleus (GO:0005634);; Molecular Function: oxidoreductase activity (GO:0016491);; Biological Process: oxidation-reduction process (GO:0055114);;	--	--	--	--	Taurine catabolism dioxygenase TauD, TfdA family	Clavaminate synthase-like protein At3g21360 GN=At3g21360 OS=Arabidopsis thaliana (Mouse-ear cress) PE=1 SV=1	S	Function unknown	hypothetical protein OsI_00718 [Oryza sativa Indica Group]
PB.115.1	LOC_Os01g09450.1	--	--	Cellular Component: nucleus (GO:0005634);; Biological Process: regulation of transcription, DNA-templated (GO:0006355);; Biological Process: auxin-activated signaling pathway (GO:0009734);; Molecular Function: protein dimerization activity (GO:0046983);;	K14484|1.13218e-80|osa:4326775|Os01g0190300; K14484 auxin-responsive protein IAA (A)	ko04075:Plant hormone signal transduction	--	--	AUX/IAA family	Auxin-responsive protein IAA2 GN=P0710E05.18 OS=Oryza sativa subsp. japonica (Rice) PE=2 SV=1	K	Transcription	Os01g0190300 [Oryza sativa Japonica Group]
PB.116.1	LOC_Os01g09510.1	[J]	Translation, ribosomal structure and biogenesis	Molecular Function: structural constituent of ribosome (GO:0003735);; Cellular Component: ribosome (GO:0005840);; Biological Process: translational elongation (GO:0006414);;	K02943|4.69999e-37|osa:4326782|Os01g0191100; K02943 large subunit ribosomal protein LP2 (A)	ko03010:Ribosome	[J]	Translation, ribosomal structure and biogenesis	60s Acidic ribosomal protein	60S acidic ribosomal protein P2A GN=RPP2A OS=Zea mays (Maize) PE=1 SV=3	J	Translation, ribosomal structure and biogenesis	Os01g0191100 [Oryza sativa Japonica Group]
PB.117.1	LOC_Os01g09560.1	[R]	General function prediction only	Molecular Function: catalytic activity (GO:0003824);; Molecular Function: ATP binding (GO:0005524);; Cellular Component: mitochondrial outer membrane (GO:0005741);; Cellular Component: mitochondrial respiratory chain complex III (GO:0005750);; Cellular Component: mitochondrial intermembrane space (GO:0005758);; Cellular Component: mitochondrial matrix (GO:0005759);; Cellular Component: plasma mem…	K01412|0|osa:4327300|Os01g0191500; K01412 mitochondrial-processing peptidase subunit alpha [EC:3.4.24.64] (A)	--	[O]	Posttranslational modification, protein turnover, chaperones	Insulinase (Peptidase family M16);; Peptidase M16 inactive domain	Mitochondrial-processing peptidase subunit alpha (Precursor) GN=MPP OS=Solanum tuberosum (Potato) PE=1 SV=1	O	Posttranslational modification, protein turnover, chaperones	Os01g0191500 [Oryza sativa Japonica Group]
PB.118.1	LOC_Os01g09570.1	[G]	Carbohydrate transport and metabolism	Molecular Function: 6-phosphofructokinase activity (GO:0003872);; Molecular Function: ATP binding (GO:0005524);; Cellular Component: plasma membrane (GO:0005886);; Cellular Component: 6-phosphofructokinase complex (GO:0005945);; Biological Process: fructose 6-phosphate metabolic process (GO:0006002);; Biological Process: glycolytic process (GO:0006096);; Biological Process: phosphorylation (GO:00…	K00850|0|osa:4327301|Os01g0191700; K00850 6-phosphofructokinase 1 [EC:2.7.1.11] (A)	ko00010:Glycolysis / Gluconeogenesis;ko00030:Pentose phosphate pathway;ko00051:Fructose and mannose metabolism;ko00052:Galactose metabolism;ko01200:Carbon metabolism;ko01230:Biosynthesis of amino acids;ko03018:RNA degradation	[G]	Carbohydrate transport and metabolism	Phosphofructokinase	ATP-dependent 6-phosphofructokinase 3 {ECO:0000255|HAMAP-Rule:MF_03186} GN=At4g26270 OS=Arabidopsis thaliana (Mouse-ear cress) PE=1 SV=1	G	Carbohydrate transport and metabolism	Os01g0191700 [Oryza sativa Japonica Group]
PB.119.1	LOC_Os01g10020.1	[R]	General function prediction only	Biological Process: RNA splicing, via endonucleolytic cleavage and ligation (GO:0000394);; Molecular Function: phosphodiesterase I activity (GO:0004528);; Cellular Component: vacuole (GO:0005773);; Biological Process: methionine biosynthetic process (GO:0009086);; Biological Process: nucleotide metabolic process (GO:0009117);; Cellular Component: plastid (GO:0009536);; Molecular Function: NADH py…	--	--	[R]	General function prediction only	Type I phosphodiesterase / nucleotide pyrophosphatase;; Sulfatase	--	S	Function unknown	Os01g0196600 [Oryza sativa Japonica Group]
PB.120.1	PB.120.1	[Q]	Secondary metabolites biosynthesis, transport and catabolism	Molecular Function: iron ion binding (GO:0005506);; Molecular Function: electron carrier activity (GO:0009055);; Cellular Component: integral component of membrane (GO:0016021);; Biological Process: brassinosteroid biosynthetic process (GO:0016132);; Molecular Function: oxidoreductase activity, acting on paired donors, with incorporation or reduction of molecular oxygen, NAD(P)H as one donor, and…	K09589|0|osa:4327329|Os01g0197100; K09589 steroid 3-oxidase [EC:1.14.-.-] (A)	ko00905:Brassinosteroid biosynthesis	[QI]	--	Cytochrome P450	Cytochrome P450 90D2 OS=Oryza sativa subsp. japonica (Rice) PE=1 SV=1	Q	Secondary metabolites biosynthesis, transport and catabolism	Os01g0197100 [Oryza sativa Japonica Group]
PB.121.1	PB.121.1	[F]	Nucleotide transport and metabolism	Molecular Function: phosphoribosylaminoimidazole carboxylase activity (GO:0004638);; Molecular Function: ATP binding (GO:0005524);; Biological Process: 'de novo' IMP biosynthetic process (GO:0006189);; Cellular Component: chloroplast (GO:0009507);; Biological Process: pollen development (GO:0009555);; Molecular Function: 5-(carboxyamino)imidazole ribonucleotide mutase activity (GO:0034023);; Mole…	K11808|0|osa:4327345|Os01g0199900; K11808 phosphoribosylaminoimidazole carboxylase [EC:4.1.1.21] (A)	ko00230:Purine metabolism	[F]	Nucleotide transport and metabolism	ATP-grasp domain;; D-ala D-ala ligase C-terminus;; Carbamoyl-phosphate synthase L chain, ATP binding domain;; ATP-grasp domain;; AIR carboxylase	Phosphoribosylaminoimidazole carboxylase, chloroplastic (Precursor; Fragment) GN=PURKE OS=Vigna aconitifolia (Moth bean) PE=2 SV=1	F	Nucleotide transport and metabolism	Os01g0199900 [Oryza sativa Japonica Group]
PB.121.2	PB.121.2	[F]	Nucleotide transport and metabolism	Molecular Function: phosphoribosylaminoimidazole carboxylase activity (GO:0004638);; Molecular Function: ATP binding (GO:0005524);; Biological Process: 'de novo' IMP biosynthetic process (GO:0006189);; Cellular Component: chloroplast (GO:0009507);; Biological Process: pollen development (GO:0009555);; Molecular Function: 5-(carboxyamino)imidazole ribonucleotide mutase activity (GO:0034023);; Mole…	K11808|0|osa:4327345|Os01g0199900; K11808 phosphoribosylaminoimidazole carboxylase [EC:4.1.1.21] (A)	ko00230:Purine metabolism	[F]	Nucleotide transport and metabolism	AIR carboxylase;; ATP-grasp domain;; ATP-grasp domain;; D-ala D-ala ligase C-terminus;; Carbamoyl-phosphate synthase L chain, ATP binding domain	Phosphoribosylaminoimidazole carboxylase, chloroplastic (Precursor; Fragment) GN=PURKE OS=Vigna aconitifolia (Moth bean) PE=2 SV=1	F	Nucleotide transport and metabolism	hypothetical protein OsJ_00755 [Oryza sativa Japonica Group]
PB.122.1	LOC_Os01g10350.1	--	--	Cellular Component: nuclear membrane (GO:0031965);; Biological Process: transmembrane transport (GO:0055085);;	K14313|4.07633e-151|osa:4327063|Os01g0200500; K14313 nuclear pore complex protein Nup53 (A)	ko03013:RNA transport	[D]	Cell cycle control, cell division, chromosome partitioning	Nup53/35/40-type RNA recognition motif;; Nup53/35/40-type RNA recognition motif	Nuclear pore complex protein NUP35 {ECO:0000303|PubMed:21189294} OS=Arabidopsis thaliana (Mouse-ear cress) PE=1 SV=1	U	Intracellular trafficking, secretion, and vesicular transport	Os01g0200500 [Oryza sativa Japonica Group]
PB.123.1	PB.123.1	--	--	Molecular Function: iron ion binding (GO:0005506);; Molecular Function: copper ion binding (GO:0005507);; Biological Process: protein targeting to membrane (GO:0006612);; Biological Process: water transport (GO:0006833);; Biological Process: cellular copper ion homeostasis (GO:0006878);; Biological Process: pattern specification process (GO:0007389);; Biological Process: regulation of cell size (…	--	--	--	--	--	Metallothionein-like protein 3A OS=Oryza sativa subsp. japonica (Rice) PE=2 SV=1	S	Function unknown	Os01g0200700 [Oryza sativa Japonica Group]
PB.124.1	PB.124.1	[RTKL]	--	Molecular Function: protein serine/threonine kinase activity (GO:0004674);; Molecular Function: ATP binding (GO:0005524);; Cellular Component: plasma membrane (GO:0005886);; Biological Process: protein phosphorylation (GO:0006468);;	--	--	[D]	Cell cycle control, cell division, chromosome partitioning	Protein kinase domain;; Protein tyrosine kinase	Probable serine/threonine-protein kinase At1g09600 GN=At1g09600 OS=Arabidopsis thaliana (Mouse-ear cress) PE=3 SV=1	T	Signal transduction mechanisms	hypothetical protein OsJ_00765 [Oryza sativa Japonica Group]
PB.125.1	LOC_Os01g10580.1	--	--	Cellular Component: mitochondrion (GO:0005739);; Biological Process: signal transduction (GO:0007165);; Molecular Function: zinc ion binding (GO:0008270);; Biological Process: response to red or far red light (GO:0009639);; Biological Process: cellular component organization (GO:0016043);; Biological Process: heterocycle biosynthetic process (GO:0018130);; Biological Process: aromatic compound bi…	--	--	--	--	B-box zinc finger	B-box zinc finger protein 22 {ECO:0000303|PubMed:19920209} GN=T30F21.7 OS=Arabidopsis thaliana (Mouse-ear cress) PE=1 SV=2	S	Function unknown	Os01g0202500 [Oryza sativa Japonica Group]
PB.126.1	LOC_Os01g10640.1	--	--	Cellular Component: cytoplasmic membrane-bounded vesicle (GO:0016023);;	--	--	--	--	--	--	--	--	Os01g0203400 [Oryza sativa Japonica Group]
PB.127.1	LOC_Os01g10790.1	--	--	Molecular Function: nucleotide binding (GO:0000166);; Cellular Component: heterotrimeric G-protein complex (GO:0005834);;	--	--	--	--	WD domain, G-beta repeat	--	S	Function unknown	Os01g0205100 [Oryza sativa Japonica Group]
PB.128.1	LOC_Os01g10820.1	[J]	Translation, ribosomal structure and biogenesis	Molecular Function: structural constituent of ribosome (GO:0003735);; Cellular Component: ribosome (GO:0005840);; Biological Process: translation (GO:0006412);; Molecular Function: rRNA binding (GO:0019843);;	K02868|7.79048e-118|osa:4327087|Os01g0205500; K02868 large subunit ribosomal protein L11e (A)	ko03010:Ribosome	[J]	Translation, ribosomal structure and biogenesis	ribosomal L5P family C-terminus;; Ribosomal protein L5	60S ribosomal protein L11 GN=OJ1430_B02.2 OS=Oryza sativa subsp. japonica (Rice) PE=2 SV=1	J	Translation, ribosomal structure and biogenesis	Os01g0205500 [Oryza sativa Japonica Group]
PB.129.1	LOC_Os01g10850.1	--	--	Molecular Function: peroxidase activity (GO:0004601);; Biological Process: response to oxidative stress (GO:0006979);; Cellular Component: cytoplasmic membrane-bounded vesicle (GO:0016023);; Molecular Function: heme binding (GO:0020037);; Molecular Function: metal ion binding (GO:0046872);; Biological Process: oxidation-reduction process (GO:0055114);;	--	--	--	--	Peroxidase	Peroxidase 4 {ECO:0000250|UniProtKB:Q42578} (Precursor) OS=Vitis vinifera (Grape) PE=1 SV=1	S	Function unknown	Os01g0205900 [Oryza sativa Japonica Group]
PB.130.1	LOC_Os01g10880.1	--	--	--	--	--	--	--	--	--	S	Function unknown	Os01g0206600 [Oryza sativa Japonica Group]
PB.131.1	LOC_Os01g11040.1	--	--	Molecular Function: actin binding (GO:0003779);; Cellular Component: cytoplasm (GO:0005737);; Cellular Component: cytoskeleton (GO:0005856);;	--	--	--	--	--	SCAR-like protein 2 GN=OSJNBa0016I09.25 OS=Oryza sativa subsp. japonica (Rice) PE=2 SV=1	S	Function unknown	Os01g0208600 [Oryza sativa Japonica Group]
PB.132.1	LOC_Os01g11054.1	[C]	Energy production and conversion	Biological Process: tricarboxylic acid cycle (GO:0006099);; Molecular Function: phosphoenolpyruvate carboxylase activity (GO:0008964);; Cellular Component: plastid (GO:0009536);; Biological Process: carbon fixation (GO:0015977);;	K01595|0|osa:4325531|Os01g0208700; K01595 phosphoenolpyruvate carboxylase [EC:4.1.1.31] (A)	ko00620:Pyruvate metabolism;ko00710:Carbon fixation in photosynthetic organisms;ko01200:Carbon metabolism	--	--	Phosphoenolpyruvate carboxylase	Phosphoenolpyruvate carboxylase 3 GN=K15M2.8 OS=Arabidopsis thaliana (Mouse-ear cress) PE=2 SV=2	C	Energy production and conversion	Os01g0208700 [Oryza sativa Japonica Group]
PB.133.1	LOC_Os01g11070.1	--	--	Molecular Function: GDP-Man:Man3GlcNAc2-PP-Dol alpha-1,2-mannosyltransferase activity (GO:0004377);; Biological Process: oligosaccharide-lipid intermediate biosynthetic process (GO:0006490);; Biological Process: GPI anchor biosynthetic process (GO:0006506);; Molecular Function: carbohydrate binding (GO:0030246);; Biological Process: ER-associated ubiquitin-dependent protein catabolic process (GO:…	K03846|0|osa:4325533|Os01g0209000; K03846 alpha-1,2-mannosyltransferase [EC:2.4.1.259 2.4.1.261] (A)	ko00510:N-Glycan biosynthesis	[MU]	--	Alg9-like mannosyltransferase family	Dol-P-Man:Man(6)GlcNAc(2)-PP-Dol alpha-1,2-mannosyltransferase GN=ALG9 OS=Arabidopsis thaliana (Mouse-ear cress) PE=1 SV=1	S	Function unknown	Os01g0209000 [Oryza sativa Japonica Group]
PB.134.2	LOC_Os01g11370.1	[L]	Replication, recombination and repair	Molecular Function: nucleic acid binding (GO:0003676);; Molecular Function: RNA helicase activity (GO:0003724);; Molecular Function: ATP binding (GO:0005524);; Cellular Component: cytosol (GO:0005829);; Molecular Function: ATP-dependent helicase activity (GO:0008026);; Cellular Component: plasmodesma (GO:0009506);;	K13117|0|osa:4325567|Os01g0212100; K13117 ATP-dependent RNA helicase DDX35 [EC:3.6.4.13] (A)	--	[A]	RNA processing and modification	Oligonucleotide/oligosaccharide-binding (OB)-fold;; Helicase associated domain (HA2);; Helicase conserved C-terminal domain	Probable pre-mRNA-splicing factor ATP-dependent RNA helicase GN=At3g26560 OS=Arabidopsis thaliana (Mouse-ear cress) PE=1 SV=2	L	Replication, recombination and repair	Os01g0212100 [Oryza sativa Japonica Group]
PB.134.3	PB.134.3	[L]	Replication, recombination and repair	Molecular Function: nucleic acid binding (GO:0003676);; Molecular Function: RNA helicase activity (GO:0003724);; Molecular Function: ATP binding (GO:0005524);; Cellular Component: cytosol (GO:0005829);; Molecular Function: ATP-dependent helicase activity (GO:0008026);; Cellular Component: plasmodesma (GO:0009506);;	K13117|0|osa:4325567|Os01g0212100; K13117 ATP-dependent RNA helicase DDX35 [EC:3.6.4.13] (A)	--	[A]	RNA processing and modification	Helicase conserved C-terminal domain;; Oligonucleotide/oligosaccharide-binding (OB)-fold;; Helicase associated domain (HA2)	Probable pre-mRNA-splicing factor ATP-dependent RNA helicase GN=At3g26560 OS=Arabidopsis thaliana (Mouse-ear cress) PE=1 SV=2	L	Replication, recombination and repair	Os01g0212100 [Oryza sativa Japonica Group]
PB.135.1	LOC_Os01g11414.1	--	--	Molecular Function: calcium ion binding (GO:0005509);; Cellular Component: integral component of membrane (GO:0016021);; Biological Process: transmembrane transport (GO:0055085);;	--	--	--	--	Sodium/calcium exchanger protein	--	P	Inorganic ion transport and metabolism	Os01g0212400 [Oryza sativa Japonica Group]
PB.136.1	LOC_Os01g11620.1	--	--	Biological Process: lipid metabolic process (GO:0006629);; Cellular Component: cytoplasmic membrane-bounded vesicle (GO:0016023);; Molecular Function: hydrolase activity, acting on ester bonds (GO:0016788);;	--	--	--	--	GDSL-like Lipase/Acylhydrolase	GDSL esterase/lipase At5g45910 (Precursor) GN=At5g45910 OS=Arabidopsis thaliana (Mouse-ear cress) PE=2 SV=1	S	Function unknown	hypothetical protein OsI_00887 [Oryza sativa Indica Group]
PB.137.1	LOC_Os01g11650.1	--	--	Cellular Component: mitochondrion (GO:0005739);; Biological Process: lipid metabolic process (GO:0006629);; Cellular Component: cytoplasmic membrane-bounded vesicle (GO:0016023);; Molecular Function: hydrolase activity, acting on ester bonds (GO:0016788);;	--	--	--	--	GDSL-like Lipase/Acylhydrolase	GDSL esterase/lipase At5g45910 (Precursor) GN=At5g45910 OS=Arabidopsis thaliana (Mouse-ear cress) PE=2 SV=1	S	Function unknown	Os01g0214800 [Oryza sativa Japonica Group]
PB.138.1	LOC_Os01g11710.1	[IR]	--	Cellular Component: cell wall (GO:0005618);; Cellular Component: vacuole (GO:0005773);; Biological Process: lipid metabolic process (GO:0006629);; Cellular Component: cytoplasmic membrane-bounded vesicle (GO:0016023);; Molecular Function: hydrolase activity, acting on ester bonds (GO:0016788);;	--	--	--	--	GDSL-like Lipase/Acylhydrolase	GDSL esterase/lipase At5g45910 (Precursor) GN=At5g45910 OS=Arabidopsis thaliana (Mouse-ear cress) PE=2 SV=1	S	Function unknown	Os01g0215700 [Oryza sativa Japonica Group]
PB.139.1	LOC_Os01g11860.1	[R]	General function prediction only	Cellular Component: mitochondrion (GO:0005739);; Cellular Component: vacuole (GO:0005773);; Cellular Component: plasma membrane (GO:0005886);; Cellular Component: chloroplast (GO:0009507);; Biological Process: response to cadmium ion (GO:0046686);;	--	--	[RV]	--	DJ-1/PfpI family;; Putative amidotransferase	Protein DJ-1 homolog B (Precursor) GN=DJ1B OS=Arabidopsis thaliana (Mouse-ear cress) PE=1 SV=1	S	Function unknown	Os01g0217500 [Oryza sativa Japonica Group]
PB.140.1	LOC_Os01g11900.1	[L]	Replication, recombination and repair	Molecular Function: DNA binding (GO:0003677);; Molecular Function: endonuclease activity (GO:0004519);; Biological Process: base-excision repair (GO:0006284);; Molecular Function: 4 iron, 4 sulfur cluster binding (GO:0051539);;	--	--	--	--	RRM in Demeter;; Permuted single zf-CXXC unit;; HhH-GPD superfamily base excision DNA repair protein	Transcriptional activator DEMETER GN=T32M21.160/T32M21.170/T32M21.180 OS=Arabidopsis thaliana (Mouse-ear cress) PE=1 SV=2	L	Replication, recombination and repair	hypothetical protein OsI_00912 [Oryza sativa Indica Group]
PB.141.1	LOC_Os01g11900.1	[L]	Replication, recombination and repair	Molecular Function: DNA binding (GO:0003677);; Molecular Function: endonuclease activity (GO:0004519);; Biological Process: base-excision repair (GO:0006284);; Molecular Function: 4 iron, 4 sulfur cluster binding (GO:0051539);;	--	--	--	--	RRM in Demeter;; Permuted single zf-CXXC unit;; HhH-GPD superfamily base excision DNA repair protein	Transcriptional activator DEMETER GN=T32M21.160/T32M21.170/T32M21.180 OS=Arabidopsis thaliana (Mouse-ear cress) PE=1 SV=2	L	Replication, recombination and repair	hypothetical protein OsI_00912 [Oryza sativa Indica Group]
PB.142.1	PB.142.1	[R]	General function prediction only	Cellular Component: plastid (GO:0009536);; Biological Process: cell redox homeostasis (GO:0045454);;	--	--	[R]	General function prediction only	TPR repeat;; Tetratricopeptide repeat;; Tetratricopeptide repeat;; Thioredoxin;; Tetratricopeptide repeat;; Tetratricopeptide repeat;; Tetratricopeptide repeat;; Tetratricopeptide repeat	TPR repeat-containing thioredoxin TTL1 GN=TTL1 OS=Arabidopsis thaliana (Mouse-ear cress) PE=1 SV=1	S	Function unknown	Os01g0218200 [Oryza sativa Japonica Group]
PB.143.1	LOC_Os01g12020.1	--	--	Biological Process: lipid transport (GO:0006869);; Molecular Function: lipid binding (GO:0008289);; Cellular Component: cytoplasmic membrane-bounded vesicle (GO:0016023);;	--	--	--	--	Probable lipid transfer;; Protease inhibitor/seed storage/LTP family	Non-specific lipid-transfer protein (Precursor) GN=IWF1&apos; OS=Beta vulgaris (Sugar beet) PE=3 SV=1	U	Intracellular trafficking, secretion, and vesicular transport	Os01g0219500 [Oryza sativa Japonica Group]
PB.144.1	PB.144.1	--	--	Molecular Function: structural constituent of ribosome (GO:0003735);; Cellular Component: ribosome (GO:0005840);; Biological Process: translation (GO:0006412);; Molecular Function: rRNA binding (GO:0019843);;	K02990|1.56378e-83|osa:4324645|Os01g0220300; K02990 small subunit ribosomal protein S6 (A)	ko03010:Ribosome	[J]	Translation, ribosomal structure and biogenesis	Ribosomal protein S6	--	J	Translation, ribosomal structure and biogenesis	Os01g0220300 [Oryza sativa Japonica Group]
PB.145.1	LOC_Os01g12210.1	--	--	Biological Process: malate transport (GO:0015743);; Cellular Component: membrane (GO:0016020);;	--	--	[R]	General function prediction only	Aluminium activated malate transporter;; Fusaric acid resistance protein-like;; Fusaric acid resistance protein family	Aluminum-activated malate transporter 9 GN=ALMT9 OS=Arabidopsis thaliana (Mouse-ear cress) PE=2 SV=1	S	Function unknown	Os01g0221600 [Oryza sativa Japonica Group]
PB.146.1	LOC_Os01g12420.1	[RTKL]	--	Molecular Function: protein serine/threonine kinase activity (GO:0004674);; Molecular Function: ATP binding (GO:0005524);; Biological Process: protein phosphorylation (GO:0006468);; Cellular Component: membrane (GO:0016020);; Cellular Component: cytoplasmic membrane-bounded vesicle (GO:0016023);; Biological Process: recognition of pollen (GO:0048544);;	--	--	--	--	Protein kinase domain;; Protein tyrosine kinase;; D-mannose binding lectin;; PAN-like domain;; S-locus glycoprotein family	G-type lectin S-receptor-like serine/threonine-protein kinase At2g19130 (Precursor) GN=At2g19130 OS=Arabidopsis thaliana (Mouse-ear cress) PE=2 SV=1	T	Signal transduction mechanisms	Os01g0223900 [Oryza sativa Japonica Group]
PB.147.1	LOC_Os01g12530.1	--	--	Biological Process: nuclear-transcribed mRNA catabolic process (GO:0000956);; Molecular Function: damaged DNA binding (GO:0003684);; Molecular Function: ATP binding (GO:0005524);; Biological Process: mismatch repair (GO:0006298);; Cellular Component: plastid (GO:0009536);;	--	--	[L]	Replication, recombination and repair	Domain of unknown function (DUF1771);; Smr domain	Polyadenylate-binding protein-interacting protein 7 GN=CID7 OS=Arabidopsis thaliana (Mouse-ear cress) PE=1 SV=1	S	Function unknown	hypothetical protein OsJ_00947 [Oryza sativa Japonica Group]
PB.148.1	PB.148.1	[R]	General function prediction only	Molecular Function: GTP binding (GO:0005525);; Cellular Component: mitochondrion (GO:0005739);;	--	--	[J]	Translation, ribosomal structure and biogenesis	50S ribosome-binding GTPase;; KH-domain-like of EngA bacterial GTPase enzymes, C-terminal;; Ferrous iron transport protein B;; Elongation factor Tu GTP binding domain;; AIG1 family;; Miro-like protein;; Ras family;; FtsK/SpoIIIE family;; Protein of unknown function, DUF258;; Dynamin family	Probable tRNA modification GTPase MnmE {ECO:0000255|HAMAP-Rule:MF_00379} OS=Cyanidium caldarium PE=3 SV=1	S	Function unknown	hypothetical protein OsJ_00948 [Oryza sativa Japonica Group]
PB.149.1	LOC_Os01g12650.1	--	--	Cellular Component: cytoplasmic membrane-bounded vesicle (GO:0016023);;	--	--	[U]	Intracellular trafficking, secretion, and vesicular transport	Reticulon	Reticulon-like protein B1 GN=F9D16.100 OS=Arabidopsis thaliana (Mouse-ear cress) PE=1 SV=1	U	Intracellular trafficking, secretion, and vesicular transport	unknown protein [Oryza sativa Japonica Group]
PB.150.1	PB.150.1	--	--	--	--	--	--	--	--	U11/U12 small nuclear ribonucleoprotein 59 kDa protein GN=SNRNP59 OS=Arabidopsis thaliana (Mouse-ear cress) PE=2 SV=1	S	Function unknown	Os01g0226500 [Oryza sativa Japonica Group]
PB.151.1	LOC_Os01g12690.1	--	--	--	--	--	--	--	Transcriptional repressor, ovate	Transcription repressor OFP8 GN=OFP8 OS=Arabidopsis thaliana (Mouse-ear cress) PE=2 SV=1	S	Function unknown	Os01g0226700 [Oryza sativa Japonica Group]
PB.152.1	PB.152.1	[IQR]	--	Molecular Function: nucleotide binding (GO:0000166);; Cellular Component: chloroplast thylakoid membrane (GO:0009535);; Biological Process: PSII associated light-harvesting complex II catabolic process (GO:0010304);; Biological Process: chlorophyll catabolic process (GO:0015996);; Cellular Component: integral component of membrane (GO:0016021);; Molecular Function: chlorophyll(ide) b reductase ac…	K13606|0|osa:4327178|Os01g0227100; K13606 chlorophyll(ide) b reductase [EC:1.1.1.294] (A)	ko00860:Porphyrin and chlorophyll metabolism	[R]	General function prediction only	--	Probable chlorophyll(ide) b reductase NYC1, chloroplastic (Precursor) OS=Oryza sativa subsp. japonica (Rice) PE=1 SV=1	S	Function unknown	Os01g0227100 [Oryza sativa Japonica Group]
PB.152.2	PB.152.2	[IQR]	--	Molecular Function: nucleotide binding (GO:0000166);; Cellular Component: chloroplast thylakoid membrane (GO:0009535);; Biological Process: PSII associated light-harvesting complex II catabolic process (GO:0010304);; Biological Process: chlorophyll catabolic process (GO:0015996);; Cellular Component: integral component of membrane (GO:0016021);; Molecular Function: chlorophyll(ide) b reductase ac…	K13606|0|osa:4327178|Os01g0227100; K13606 chlorophyll(ide) b reductase [EC:1.1.1.294] (A)	ko00860:Porphyrin and chlorophyll metabolism	[R]	General function prediction only	short chain dehydrogenase;; Enoyl-(Acyl carrier protein) reductase;; KR domain	Probable chlorophyll(ide) b reductase NYC1, chloroplastic (Precursor) OS=Oryza sativa subsp. japonica (Rice) PE=1 SV=1	S	Function unknown	hypothetical protein OsI_00981 [Oryza sativa Indica Group]
PB.153.1	PB.153.1	[RTKL]	--	Molecular Function: protein serine/threonine kinase activity (GO:0004674);; Molecular Function: ATP binding (GO:0005524);; Cellular Component: plasma membrane (GO:0005886);; Biological Process: protein phosphorylation (GO:0006468);; Cellular Component: plastid (GO:0009536);;	--	--	[T]	Signal transduction mechanisms	Protein kinase domain;; Protein tyrosine kinase	Proline-rich receptor-like protein kinase PERK1 GN=PERK1 OS=Arabidopsis thaliana (Mouse-ear cress) PE=2 SV=1	T	Signal transduction mechanisms	hypothetical protein OsI_00982 [Oryza sativa Indica Group]
PB.154.1	LOC_Os01g12730.1	[R]	General function prediction only	Molecular Function: GTP binding (GO:0005525);; Cellular Component: nucleus (GO:0005634);; Cellular Component: vacuole (GO:0005773);; Cellular Component: plasma membrane (GO:0005886);; Biological Process: small GTPase mediated signal transduction (GO:0007264);; Biological Process: protein transport (GO:0015031);; Molecular Function: hydrolase activity (GO:0016787);;	K07897|2.0197e-152|osa:4327180|Os01g0227300; K07897 Ras-related protein Rab-7A (A)	ko04144:Endocytosis;ko04145:Phagosome	[R]	General function prediction only	Ras family;; Miro-like protein;; ADP-ribosylation factor family;; Elongation factor Tu GTP binding domain;; 50S ribosome-binding GTPase;; Gtr1/RagA G protein conserved region	Ras-related protein Rab7 OS=Prunus armeniaca (Apricot) PE=2 SV=1	S	Function unknown	Os01g0227300 [Oryza sativa Japonica Group]
PB.155.1	LOC_Os01g12810.1	--	--	--	K17710|0|osa:4327187|Os01g0228400; K17710 pentatricopeptide repeat domain-containing protein 1 (A)	--	[R]	General function prediction only	PPR repeat family;; PPR repeat;; Pentatricopeptide repeat domain;; PPR repeat;; Tetratricopeptide repeat	Pentatricopeptide repeat-containing protein At5g25630 GN=At5g25630 OS=Arabidopsis thaliana (Mouse-ear cress) PE=2 SV=2	S	Function unknown	Os01g0228400 [Oryza sativa Japonica Group]
PB.156.1	LOC_Os01g12880.1	--	--	Cellular Component: intracellular (GO:0005622);; Biological Process: intracellular protein transport (GO:0006886);;	--	--	[U]	Intracellular trafficking, secretion, and vesicular transport	VHS domain;; GAT domain	--	S	Function unknown	Os01g0229200 [Oryza sativa Japonica Group]
PB.157.1	PB.157.1	--	--	Cellular Component: plastid (GO:0009536);; Cellular Component: cytoplasmic membrane-bounded vesicle (GO:0016023);;	--	--	[R]	General function prediction only	--	--	Q	Secondary metabolites biosynthesis, transport and catabolism	hypothetical protein OsI_01009 [Oryza sativa Indica Group]
PB.158.1	PB.158.1	[O]	Posttranslational modification, protein turnover, chaperones	Molecular Function: ubiquitin-protein transferase activity (GO:0004842);; Cellular Component: mitochondrion (GO:0005739);; Biological Process: vacuolar transport (GO:0007034);; Biological Process: protein deubiquitination (GO:0016579);; Cellular Component: retromer complex (GO:0030904);;	K10581|1.40446e-156|dosa:Os01t0229900-01|Os01g0229900; Similar to Ubiquitin-conjugating enzyme family protein, expressed.; K10581 ubiquitin-conjugating enzyme E2 O [EC:6.3.2.19] (A)	ko04120:Ubiquitin mediated proteolysis	[O]	Posttranslational modification, protein turnover, chaperones	Ubiquitin-conjugating enzyme	Probable ubiquitin-conjugating enzyme E2 25 GN=UBC25 OS=Arabidopsis thaliana (Mouse-ear cress) PE=2 SV=1	O	Posttranslational modification, protein turnover, chaperones	unnamed protein product [Oryza sativa Japonica Group]
PB.158.2	PB.158.2	--	--	Molecular Function: ubiquitin-protein transferase activity (GO:0004842);; Cellular Component: mitochondrion (GO:0005739);; Biological Process: vacuolar transport (GO:0007034);; Biological Process: protein deubiquitination (GO:0016579);; Cellular Component: retromer complex (GO:0030904);;	K10581|2.16548e-92|dosa:Os01t0229900-01|Os01g0229900; Similar to Ubiquitin-conjugating enzyme family protein, expressed.; K10581 ubiquitin-conjugating enzyme E2 O [EC:6.3.2.19] (A)	ko04120:Ubiquitin mediated proteolysis	[G]	Carbohydrate transport and metabolism	--	Shaggy-related protein kinase eta GN=F28A21.120 OS=Arabidopsis thaliana (Mouse-ear cress) PE=1 SV=2	O	Posttranslational modification, protein turnover, chaperones	unnamed protein product [Oryza sativa Japonica Group]
PB.159.1	LOC_Os01g13030.2	--	--	Cellular Component: nucleus (GO:0005634);; Biological Process: regulation of transcription, DNA-templated (GO:0006355);; Biological Process: regulation of translation (GO:0006417);; Biological Process: auxin-activated signaling pathway (GO:0009734);; Molecular Function: protein dimerization activity (GO:0046983);;	K14484|8.43621e-125|osa:4325890|Os01g0231000; K14484 auxin-responsive protein IAA (A)	ko04075:Plant hormone signal transduction	--	--	AUX/IAA family	Auxin-responsive protein IAA3 OS=Oryza sativa subsp. japonica (Rice) PE=2 SV=1	--	--	Os01g0231000 [Oryza sativa Japonica Group]
PB.160.1	PB.160.1	[RTKL]	--	Molecular Function: protein serine/threonine kinase activity (GO:0004674);; Molecular Function: ATP binding (GO:0005524);; Biological Process: protein phosphorylation (GO:0006468);;	--	--	[T]	Signal transduction mechanisms	Protein kinase domain;; Protein tyrosine kinase	Casein kinase I isoform delta-like GN=At4g26100 OS=Arabidopsis thaliana (Mouse-ear cress) PE=2 SV=2	T	Signal transduction mechanisms	hypothetical protein OsI_01020 [Oryza sativa Indica Group]
PB.161.1	LOC_Os01g13090.1	--	--	Molecular Function: RNA binding (GO:0003723);; Molecular Function: catalytic activity (GO:0003824);; Cellular Component: mitochondrion (GO:0005739);; Biological Process: RNA metabolic process (GO:0016070);;	K18666|5.36386e-168|dosa:Os01t0231800-01|Os01g0231800; Similar to cDNA clone:J033025F17, full insert sequence.; K18666 activating signal cointegrator complex subunit 1 (A)	--	[K]	Transcription	AKAP7 2'5' RNA ligase-like domain	--	S	Function unknown	Os01g0231800 [Oryza sativa Japonica Group]
PB.162.1	LOC_Os01g13100.1	--	--	Molecular Function: RNA binding (GO:0003723);; Molecular Function: catalytic activity (GO:0003824);; Cellular Component: mitochondrion (GO:0005739);; Biological Process: regulation of transcription, DNA-templated (GO:0006355);;	K18666|0|osa:4325894|Os01g0231900; K18666 activating signal cointegrator complex subunit 1 (A)	--	[K]	Transcription	AKAP7 2'5' RNA ligase-like domain;; KH domain;; KH domain	--	S	Function unknown	Os01g0231900 [Oryza sativa Japonica Group]
PB.163.1	LOC_Os01g13120.1	[G]	Carbohydrate transport and metabolism	Molecular Function: transporter activity (GO:0005215);; Biological Process: transport (GO:0006810);; Cellular Component: plant-type vacuole membrane (GO:0009705);; Cellular Component: integral component of membrane (GO:0016021);; Cellular Component: central vacuole (GO:0042807);;	K09873|2.58569e-111|osa:4324276|Os01g0232000; K09873 aquaporin TIP (A)	--	[G]	Carbohydrate transport and metabolism	Major intrinsic protein	Probable aquaporin TIP4-3 GN=P0431F01.24 OS=Oryza sativa subsp. japonica (Rice) PE=2 SV=1	G	Carbohydrate transport and metabolism	Os01g0232000 [Oryza sativa Japonica Group]
PB.164.1	LOC_Os01g13130.1	--	--	Cellular Component: plant-type vacuole (GO:0000325);; Molecular Function: transporter activity (GO:0005215);; Cellular Component: vacuolar membrane (GO:0005774);; Biological Process: transport (GO:0006810);; Cellular Component: integral component of membrane (GO:0016021);;	K09873|1.60367e-135|osa:4324277|Os01g0232100; K09873 aquaporin TIP (A)	--	[G]	Carbohydrate transport and metabolism	Major intrinsic protein	Probable aquaporin TIP4-2 GN=P0431F01.26 OS=Oryza sativa subsp. japonica (Rice) PE=2 SV=2	G	Carbohydrate transport and metabolism	Os01g0232100 [Oryza sativa Japonica Group]
PB.165.1	PB.165.1	[R]	General function prediction only	Biological Process: tRNA 3'-trailer cleavage (GO:0042779);; Molecular Function: 3'-tRNA processing endoribonuclease activity (GO:0042781);;	K00784|0|osa:4324278|Os01g0232300; K00784 ribonuclease Z [EC:3.1.26.11] (A)	ko03013:RNA transport	[R]	General function prediction only	Beta-lactamase superfamily domain;; Metallo-beta-lactamase superfamily;; tRNase Z endonuclease	--	S	Function unknown	hypothetical protein OsJ_00998 [Oryza sativa Japonica Group]
PB.166.1	LOC_Os01g13160.1	--	--	Biological Process: cell morphogenesis (GO:0000902);; Biological Process: protein targeting to vacuole (GO:0006623);; Cellular Component: membrane (GO:0016020);; Biological Process: cell growth (GO:0016049);; Molecular Function: acid-amino acid ligase activity (GO:0016881);; Biological Process: Golgi vesicle transport (GO:0048193);;	--	--	--	--	ENTH domain;; VHS domain	VHS domain-containing protein At3g16270 GN=At3g16270 OS=Arabidopsis thaliana (Mouse-ear cress) PE=1 SV=1	S	Function unknown	Os01g0232400 [Oryza sativa Japonica Group]
PB.167.1	LOC_Os01g13170.1	[O]	Posttranslational modification, protein turnover, chaperones	Biological Process: cell morphogenesis (GO:0000902);; Biological Process: protein targeting to vacuole (GO:0006623);; Cellular Component: plastid (GO:0009536);; Cellular Component: membrane (GO:0016020);; Biological Process: cell growth (GO:0016049);; Molecular Function: acid-amino acid ligase activity (GO:0016881);; Biological Process: Golgi vesicle transport (GO:0048193);;	K10581|0|osa:4324280|Os01g0232500; K10581 ubiquitin-conjugating enzyme E2 O [EC:6.3.2.19] (A)	ko04120:Ubiquitin mediated proteolysis	[O]	Posttranslational modification, protein turnover, chaperones	Ubiquitin-conjugating enzyme	Probable ubiquitin-conjugating enzyme E2 26 GN=UBC26 OS=Arabidopsis thaliana (Mouse-ear cress) PE=2 SV=2	O	Posttranslational modification, protein turnover, chaperones	Os01g0232500 [Oryza sativa Japonica Group]
PB.168.1	LOC_Os01g13190.1	[E]	Amino acid transport and metabolism	Biological Process: histidine biosynthetic process (GO:0000105);; Molecular Function: histidinol dehydrogenase activity (GO:0004399);; Cellular Component: mitochondrion (GO:0005739);; Molecular Function: zinc ion binding (GO:0008270);; Biological Process: spermidine biosynthetic process (GO:0008295);; Biological Process: response to UV (GO:0009411);; Biological Process: pollen development (GO:000…	K00013|0|osa:4324282|Os01g0232700; K00013 histidinol dehydrogenase [EC:1.1.1.23] (A)	ko00340:Histidine metabolism;ko01230:Biosynthesis of amino acids	[E]	Amino acid transport and metabolism	Histidinol dehydrogenase	Histidinol dehydrogenase, chloroplastic (Precursor) GN=P0702F03.3 OS=Oryza sativa subsp. japonica (Rice) PE=2 SV=1	E	Amino acid transport and metabolism	Os01g0232700 [Oryza sativa Japonica Group]
PB.169.1	LOC_Os01g13390.1	--	--	Cellular Component: chloroplast thylakoid membrane (GO:0009535);; Biological Process: leaf morphogenesis (GO:0009965);; Biological Process: cell differentiation (GO:0030154);; Biological Process: positive regulation of transcription, DNA-templated (GO:0045893);;	--	--	--	--	--	--	S	Function unknown	Os01g0235100 [Oryza sativa Japonica Group]
PB.170.1	LOC_Os01g13420.1	--	--	--	--	--	--	--	SOUL heme-binding protein	Heme-binding-like protein At3g10130, chloroplastic (Precursor) GN=At3g10130 OS=Arabidopsis thaliana (Mouse-ear cress) PE=2 SV=1	S	Function unknown	Os01g0235300 [Oryza sativa Japonica Group]
PB.171.1	LOC_Os01g13470.1	--	--	Molecular Function: RNA binding (GO:0003723);;	K13162|0|obr:102707903|KH domain-containing protein At4g18375-like; K13162 poly(rC)-binding protein 2/3/4 (A)	--	[AR]	--	KH domain;; KH domain;; KH domain;; KH domain	KH domain-containing protein At4g18375 GN=At4g18375 OS=Arabidopsis thaliana (Mouse-ear cress) PE=2 SV=1	S	Function unknown	hypothetical protein OsJ_01028 [Oryza sativa Japonica Group]
PB.172.1	LOC_Os01g13520.1	--	--	Molecular Function: DNA binding (GO:0003677);; Cellular Component: nucleus (GO:0005634);; Biological Process: regulation of transcription, DNA-templated (GO:0006355);; Biological Process: auxin-activated signaling pathway (GO:0009734);; Molecular Function: protein dimerization activity (GO:0046983);;	--	--	--	--	Auxin response factor;; AUX/IAA family;; B3 DNA binding domain	Auxin response factor 1 OS=Oryza sativa subsp. japonica (Rice) PE=2 SV=1	K	Transcription	Os01g0236300 [Oryza sativa Japonica Group]
PB.173.1	LOC_Os01g13540.1	--	--	Molecular Function: DNA binding (GO:0003677);; Cellular Component: nucleus (GO:0005634);; Biological Process: regulation of transcription, DNA-templated (GO:0006355);; Biological Process: response to water deprivation (GO:0009414);; Biological Process: stomatal movement (GO:0010118);; Biological Process: response to nitrate (GO:0010167);; Biological Process: nitrate assimilation (GO:0042128);;	--	--	--	--	RWP-RK domain;; PB1 domain	Protein NLP3 OS=Oryza sativa subsp. japonica (Rice) PE=3 SV=1	S	Function unknown	Os01g0236700 [Oryza sativa Japonica Group]
PB.174.1	PB.174.1	[EH]	--	Biological Process: metabolic process (GO:0008152);; Molecular Function: transaminase activity (GO:0008483);;	K18482|0|osa:4326358|Os01g0238500; K18482 4-amino-4-deoxychorismate lyase [EC:4.1.3.38] (A)	ko00790:Folate biosynthesis	[E]	Amino acid transport and metabolism	Aminotransferase class IV	D-amino-acid transaminase, chloroplastic {ECO:0000303|PubMed:18318836} (Precursor) OS=Arabidopsis thaliana (Mouse-ear cress) PE=1 SV=1	E	Amino acid transport and metabolism	Os01g0238500 [Oryza sativa Japonica Group]
PB.174.2	LOC_Os01g13690.1	[EH]	--	Biological Process: metabolic process (GO:0008152);; Molecular Function: transaminase activity (GO:0008483);;	K18482|0|osa:4326358|Os01g0238500; K18482 4-amino-4-deoxychorismate lyase [EC:4.1.3.38] (A)	ko00790:Folate biosynthesis	[E]	Amino acid transport and metabolism	Aminotransferase class IV	D-amino-acid transaminase, chloroplastic {ECO:0000303|PubMed:18318836} (Precursor) OS=Arabidopsis thaliana (Mouse-ear cress) PE=1 SV=1	E	Amino acid transport and metabolism	Os01g0238500 [Oryza sativa Japonica Group]
PB.175.1	LOC_Os01g13700.1	--	--	--	K07466|4.55431e-98|osa:4326359|Os01g0238600; K07466 replication factor A1 (A)	ko03030:DNA replication;ko03420:Nucleotide excision repair;ko03430:Mismatch repair;ko03440:Homologous recombination	--	--	--	Uncharacterized protein At4g28440 GN=At4g28440 OS=Arabidopsis thaliana (Mouse-ear cress) PE=1 SV=1	S	Function unknown	Os01g0238600 [Oryza sativa Japonica Group]
PB.176.1	LOC_Os01g13730.1	[R]	General function prediction only	Molecular Function: nucleotide binding (GO:0000166);; Biological Process: mitotic cell cycle (GO:0000278);; Cellular Component: heterotrimeric G-protein complex (GO:0005834);; Biological Process: RNA processing (GO:0006396);; Biological Process: pyrimidine ribonucleotide biosynthetic process (GO:0009220);; Cellular Component: Cul4-RING E3 ubiquitin ligase complex (GO:0080008);;	K11806|0|obr:102704651|DDB1- and CUL4-associated factor 13-like; K11806 WD repeat and SOF domain-containing protein 1 (A)	--	[A]	RNA processing and modification	WD domain, G-beta repeat;; Sof1-like domain;; Eukaryotic translation initiation factor eIF2A	Dynein assembly factor with WDR repeat domains 1 GN=DAW1 OS=Chlamydomonas reinhardtii (Chlamydomonas smithii) PE=1 SV=1	S	Function unknown	hypothetical protein OsJ_01046 [Oryza sativa Japonica Group]
PB.177.1	PB.177.1	[RTKL]	--	Molecular Function: protein serine/threonine kinase activity (GO:0004674);; Molecular Function: protein tyrosine kinase activity (GO:0004713);; Molecular Function: ATP binding (GO:0005524);; Cellular Component: integral component of membrane (GO:0016021);; Cellular Component: cytoplasmic membrane-bounded vesicle (GO:0016023);; Biological Process: protein autophosphorylation (GO:0046777);;	--	--	--	--	Protein kinase domain;; Protein tyrosine kinase;; Leucine rich repeat;; Leucine Rich repeats (2 copies);; Leucine Rich Repeat;; Leucine Rich repeat;; Leucine rich repeat N-terminal domain;; Leucine rich repeat	Receptor-like protein kinase HSL1 (Precursor) GN=HSL1 OS=Arabidopsis thaliana (Mouse-ear cress) PE=2 SV=1	S	Function unknown	hypothetical protein OsI_01100 [Oryza sativa Indica Group]
PB.178.1	LOC_Os01g14020.1	--	--	Cellular Component: mitochondrion (GO:0005739);;	--	--	[R]	General function prediction only	Optic atrophy 3 protein (OPA3)	--	S	Function unknown	Os01g0242300 [Oryza sativa Japonica Group]
PB.179.1	LOC_Os01g14070.1	--	--	Molecular Function: structural constituent of ribosome (GO:0003735);; Cellular Component: ribosome (GO:0005840);; Biological Process: translation (GO:0006412);;	--	--	--	--	--	60S ribosomal protein L18a-like protein GN=At1g29970 OS=Arabidopsis thaliana (Mouse-ear cress) PE=2 SV=2	S	Function unknown	Os01g0242900 [Oryza sativa Japonica Group]
PB.180.1	LOC_Os01g14440.1	--	--	Molecular Function: sequence-specific DNA binding transcription factor activity (GO:0003700);; Biological Process: regulation of transcription, DNA-templated (GO:0006355);; Molecular Function: sequence-specific DNA binding (GO:0043565);;	--	--	--	--	WRKY DNA -binding domain	WRKY transcription factor 6 GN=WRKY6 OS=Arabidopsis thaliana (Mouse-ear cress) PE=1 SV=1	K	Transcription	Os01g0246700 [Oryza sativa Japonica Group]
PB.181.1	LOC_Os01g14514.1	--	--	Cellular Component: integral component of membrane (GO:0016021);; Cellular Component: cytoplasmic membrane-bounded vesicle (GO:0016023);; Biological Process: transmembrane transport (GO:0055085);;	--	--	--	--	--	--	--	--	Os01g0247600 [Oryza sativa Japonica Group]
PB.182.1	LOC_Os01g14580.1	[C]	Energy production and conversion	Molecular Function: magnesium ion binding (GO:0000287);; Molecular Function: isocitrate dehydrogenase (NADP+) activity (GO:0004450);; Molecular Function: copper ion binding (GO:0005507);; Cellular Component: peroxisome (GO:0005777);; Cellular Component: plasma membrane (GO:0005886);; Biological Process: tricarboxylic acid cycle (GO:0006099);; Biological Process: isocitrate metabolic process (GO:0…	K00031|0|osa:4327213|Os01g0248400; K00031 isocitrate dehydrogenase [EC:1.1.1.42] (A)	ko00020:Citrate cycle (TCA cycle);ko00480:Glutathione metabolism;ko01200:Carbon metabolism;ko01210:2-Oxocarboxylic acid metabolism;ko01230:Biosynthesis of amino acids;ko04146:Peroxisome	[C]	Energy production and conversion	Isocitrate/isopropylmalate dehydrogenase	Isocitrate dehydrogenase [NADP] OS=Nicotiana tabacum (Common tobacco) PE=2 SV=1	C	Energy production and conversion	Os01g0248400 [Oryza sativa Japonica Group]
PB.183.1	LOC_Os01g14630.1	[H]	Coenzyme transport and metabolism	Molecular Function: farnesyltranstransferase activity (GO:0004311);; Biological Process: isoprenoid biosynthetic process (GO:0008299);; Cellular Component: plastid (GO:0009536);; Molecular Function: 2-alkenal reductase [NAD(P)] activity (GO:0032440);; Biological Process: diterpene phytoalexin metabolic process (GO:0051501);; Biological Process: oxidation-reduction process (GO:0055114);;	K13789|0|osa:9272383|Os01g0248701; K13789 geranylgeranyl diphosphate synthase, type II [EC:2.5.1.1 2.5.1.10 2.5.1.29] (A)	ko00900:Terpenoid backbone biosynthesis	[H]	Coenzyme transport and metabolism	Polyprenyl synthetase	Geranylgeranyl pyrophosphate synthase, chloroplastic (Precursor) GN=GGPS OS=Hevea brasiliensis (Para rubber tree) PE=1 SV=1	H	Coenzyme transport and metabolism	Os01g0248701 [Oryza sativa Japonica Group]
PB.184.1	LOC_Os01g14790.1	--	--	Biological Process: RNA splicing, via endonucleolytic cleavage and ligation (GO:0000394);; Biological Process: phosphatidylinositol biosynthetic process (GO:0006661);; Biological Process: methionine biosynthetic process (GO:0009086);;	--	--	--	--	--	--	S	Function unknown	Os01g0250600 [Oryza sativa Japonica Group]
PB.185.1	LOC_Os01g14810.1	--	--	Molecular Function: 5'-nucleotidase activity (GO:0008253);; Cellular Component: chloroplast stroma (GO:0009570);; Molecular Function: metal ion binding (GO:0046872);;	--	--	[F]	Nucleotide transport and metabolism	5' nucleotidase family	--	S	Function unknown	PREDICTED: cytosolic purine 5&apos;-nucleotidase-like, partial [Oryza brachyantha]
PB.186.1	LOC_Os01g14820.1	--	--	Cellular Component: endoplasmic reticulum (GO:0005783);; Biological Process: intra-Golgi vesicle-mediated transport (GO:0006891);; Cellular Component: chloroplast outer membrane (GO:0009707);; Biological Process: lithium ion transport (GO:0010351);; Biological Process: protein import into peroxisome matrix (GO:0016558);; Biological Process: acylglycerol transport (GO:0034196);; Molecular Function…	--	--	--	--	Protein of unknown function (DUF3769)	Protein TRIGALACTOSYLDIACYLGLYCEROL 4, chloroplastic GN=F17A9.11 OS=Arabidopsis thaliana (Mouse-ear cress) PE=1 SV=1	S	Function unknown	Os01g0251000 [Oryza sativa Japonica Group]
PB.187.1	LOC_Os01g14840.1	--	--	Molecular Function: zinc ion binding (GO:0008270);;	--	--	[O]	Posttranslational modification, protein turnover, chaperones	--	--	S	Function unknown	Os01g0251200 [Oryza sativa Japonica Group]
PB.188.1	LOC_Os01g14860.1	[RTKL]	--	Molecular Function: protein serine/threonine kinase activity (GO:0004674);; Molecular Function: ATP binding (GO:0005524);; Cellular Component: cytosol (GO:0005829);; Biological Process: protein phosphorylation (GO:0006468);; Biological Process: meristem structural organization (GO:0009933);;	K00924|0|osa:4327108|Os01g0252100; K00924 [EC:2.7.1.-] (A)	--	[G]	Carbohydrate transport and metabolism	Protein kinase domain;; Protein tyrosine kinase;; Choline/ethanolamine kinase	Glycogen synthase kinase-3 homolog MsK-3 GN=MSK-3 OS=Medicago sativa (Alfalfa) PE=2 SV=2	T	Signal transduction mechanisms	Os01g0252100 [Oryza sativa Japonica Group]
PB.189.1	LOC_Os01g14950.1	[U]	Intracellular trafficking, secretion, and vesicular transport	Cellular Component: cell wall (GO:0005618);; Cellular Component: nuclear envelope (GO:0005635);; Cellular Component: nucleolus (GO:0005730);; Cellular Component: cytosol (GO:0005829);; Biological Process: protein import into nucleus (GO:0006606);; Molecular Function: protein transporter activity (GO:0008565);; Biological Process: modulation by virus of host morphology or physiology (GO:0019048);;…	--	--	[U]	Intracellular trafficking, secretion, and vesicular transport	Armadillo/beta-catenin-like repeat;; Importin beta binding domain;; HEAT repeats;; HEAT-like repeat;; HEAT repeat;; Armadillo-like	Importin subunit alpha-1a OS=Oryza sativa subsp. japonica (Rice) PE=1 SV=2	U	Intracellular trafficking, secretion, and vesicular transport	Os01g0253300 [Oryza sativa Japonica Group]
PB.190.1	LOC_Os01g15470.1	[RTKL]	--	Molecular Function: protein serine/threonine kinase activity (GO:0004674);; Molecular Function: ATP binding (GO:0005524);; Biological Process: protein phosphorylation (GO:0006468);;	--	--	[T]	Signal transduction mechanisms	Protein kinase domain;; Protein tyrosine kinase	Serine/threonine-protein kinase CDL1 {ECO:0000305} OS=Arabidopsis thaliana (Mouse-ear cress) PE=1 SV=1	T	Signal transduction mechanisms	hypothetical protein OsI_01251 [Oryza sativa Indica Group]
PB.191.1	LOC_Os01g15600.1	--	--	Molecular Function: nucleic acid binding (GO:0003676);; Cellular Component: cytoplasm (GO:0005737);; Biological Process: calcium ion transport (GO:0006816);; Biological Process: water transport (GO:0006833);; Biological Process: Golgi organization (GO:0007030);; Biological Process: vacuole organization (GO:0007033);; Biological Process: response to salt stress (GO:0009651);; Biological Process: r…	--	--	[K]	Transcription	PurA ssDNA and RNA-binding protein;; Protein of unknown function (DUF3276)	Transcription factor Pur-alpha 1 GN=PURA1 OS=Arabidopsis thaliana (Mouse-ear cress) PE=1 SV=2	K	Transcription	hypothetical protein OsI_01264 [Oryza sativa Indica Group]
PB.192.1	LOC_Os01g15610.1	--	--	Cellular Component: cytoplasmic membrane-bounded vesicle (GO:0016023);;	--	--	--	--	--	--	S	Function unknown	Os01g0260800 [Oryza sativa Japonica Group]
PB.193.1	LOC_Os01g15630.1	--	--	Molecular Function: zinc ion binding (GO:0008270);;	--	--	--	--	Ring finger domain;; Zinc finger, C3HC4 type (RING finger)	--	S	Function unknown	Os01g0261100 [Oryza sativa Japonica Group]
PB.193.2	LOC_Os01g15630.1	--	--	Molecular Function: zinc ion binding (GO:0008270);;	--	--	--	--	Ring finger domain;; Zinc finger, C3HC4 type (RING finger)	--	S	Function unknown	Os01g0261100 [Oryza sativa Japonica Group]
PB.194.1	PB.194.1	[MG]	--	Molecular Function: nucleotide binding (GO:0000166);; Molecular Function: catalytic activity (GO:0003824);; Biological Process: cellular metabolic process (GO:0044237);; Molecular Function: coenzyme binding (GO:0050662);;	--	--	[G]	Carbohydrate transport and metabolism	--	--	M	Cell wall/membrane/envelope biogenesis	Os01g0261500 [Oryza sativa Japonica Group]
PB.195.1	LOC_Os01g15770.1	--	--	Cellular Component: integral component of membrane (GO:0016021);;	--	--	[S]	Function unknown	TLC domain	--	U	Intracellular trafficking, secretion, and vesicular transport	hypothetical protein OsI_01272 [Oryza sativa Indica Group]
PB.196.1	LOC_Os01g15790.3	--	--	--	--	--	--	--	--	--	S	Function unknown	hypothetical protein OsI_01274 [Oryza sativa Indica Group]
PB.196.2	PB.196.2	--	--	--	--	--	--	--	--	--	S	Function unknown	hypothetical protein OsI_01274 [Oryza sativa Indica Group]
PB.197.1	LOC_Os01g15830.1	--	--	Molecular Function: peroxidase activity (GO:0004601);; Cellular Component: cell wall (GO:0005618);; Biological Process: response to oxidative stress (GO:0006979);; Cellular Component: cytoplasmic membrane-bounded vesicle (GO:0016023);; Molecular Function: heme binding (GO:0020037);; Molecular Function: metal ion binding (GO:0046872);; Biological Process: response to other organism (GO:0051707);; …	K00430|0|osa:4325129|Os01g0263300; K00430 peroxidase [EC:1.11.1.7] (A)	ko00360:Phenylalanine metabolism;ko00940:Phenylpropanoid biosynthesis	--	--	Peroxidase	Peroxidase 72 (Precursor) OS=Arabidopsis thaliana (Mouse-ear cress) PE=1 SV=1	G	Carbohydrate transport and metabolism	hypothetical protein OsI_01277 [Oryza sativa Indica Group]
PB.198.1	LOC_Os01g15970.1	--	--	Cellular Component: mitochondrion (GO:0005739);;	--	--	--	--	--	--	--	--	Os01g0264400 [Oryza sativa Japonica Group]
PB.199.1	LOC_Os01g15979.1	--	--	Cellular Component: mitochondrion (GO:0005739);;	--	--	--	--	--	--	S	Function unknown	Os01g0264500 [Oryza sativa Japonica Group]
PB.200.1	LOC_Os01g16110.1	[OJ]	--	Molecular Function: RNA binding (GO:0003723);; Cellular Component: nucleus (GO:0005634);; Cellular Component: mitochondrion (GO:0005739);; Cellular Component: cytosol (GO:0005829);; Biological Process: RNA processing (GO:0006396);; Cellular Component: ribonucleoprotein complex (GO:0030529);;	K18757|0|osa:4324370|Os01g0266000; K18757 la-related protein 1 (A)	--	[OJ]	--	La domain	La-related protein 1A GN=LARP1A OS=Arabidopsis thaliana (Mouse-ear cress) PE=1 SV=1	JO	--	Os01g0266000 [Oryza sativa Japonica Group]
PB.201.1	LOC_Os01g16140.1	--	--	--	--	--	--	--	--	--	S	Function unknown	Os01g0266400 [Oryza sativa Japonica Group]
PB.202.1	LOC_Os01g16180.1	--	--	Molecular Function: nucleic acid binding (GO:0003676);; Cellular Component: cytosol (GO:0005829);; Biological Process: nucleobase-containing compound metabolic process (GO:0006139);; Molecular Function: S-adenosylmethionine-dependent methyltransferase activity (GO:0008757);; Biological Process: embryo development ending in seed dormancy (GO:0009793);; Biological Process: methylation (GO:0032259);;	--	--	[K]	Transcription	MT-A70	Methyltransferase-like protein 1 GN=EMB1691 OS=Arabidopsis thaliana (Mouse-ear cress) PE=2 SV=1	S	Function unknown	Os01g0267100 [Oryza sativa Japonica Group]
PB.203.1	LOC_Os01g16190.1	[R]	General function prediction only	Biological Process: mitotic G2 phase (GO:0000085);; Cellular Component: nucleus (GO:0005634);; Cellular Component: cytosol (GO:0005829);; Biological Process: glycolytic process (GO:0006096);; Biological Process: N-terminal protein myristoylation (GO:0006499);; Biological Process: protein targeting to vacuole (GO:0006623);; Biological Process: fatty acid beta-oxidation (GO:0006635);; Biological Pr…	K03030|0|osa:4324379|Os01g0267200; K03030 26S proteasome regulatory subunit N11 (A)	ko03050:Proteasome	[O]	Posttranslational modification, protein turnover, chaperones	JAB1/Mov34/MPN/PAD-1 ubiquitin protease;; Maintenance of mitochondrial structure and function;; Prokaryotic homologs of the JAB domain	26S proteasome non-ATPase regulatory subunit 14 homolog GN=RPN11 OS=Arabidopsis thaliana (Mouse-ear cress) PE=1 SV=1	S	Function unknown	Os01g0267200 [Oryza sativa Japonica Group]
PB.204.1	LOC_Os01g16290.1	[L]	Replication, recombination and repair	Molecular Function: DNA binding (GO:0003677);; Molecular Function: DNA topoisomerase type II (ATP-hydrolyzing) activity (GO:0003918);; Molecular Function: ATP binding (GO:0005524);; Cellular Component: chromosome (GO:0005694);; Cellular Component: mitochondrion (GO:0005739);; Biological Process: DNA-dependent DNA replication (GO:0006261);; Biological Process: DNA topological change (GO:0006265);;…	K02470|0|osa:4326261|Os01g0268300; K02470 DNA gyrase subunit B [EC:5.99.1.3] (A)	--	[B]	Chromatin structure and dynamics	DNA gyrase B;; DNA gyrase B subunit, carboxyl terminus;; Toprim domain;; Histidine kinase-, DNA gyrase B-, and HSP90-like ATPase	DNA gyrase subunit B, chloroplastic/mitochondrial (Precursor) OS=Oryza sativa subsp. japonica (Rice) PE=2 SV=1	L	Replication, recombination and repair	Os01g0268300 [Oryza sativa Japonica Group]
PB.205.1	LOC_Os01g16330.1	--	--	Molecular Function: serine-type endopeptidase activity (GO:0004252);; Cellular Component: integral component of membrane (GO:0016021);;	--	--	[S]	Function unknown	UBA/TS-N domain;; Der1-like family	--	S	Function unknown	Os01g0268800 [Oryza sativa Japonica Group]
PB.206.1	PB.206.1	--	--	Molecular Function: ATP binding (GO:0005524);; Cellular Component: ribosome (GO:0005840);; Biological Process: apoptotic process (GO:0006915);; Biological Process: defense response (GO:0006952);; Molecular Function: ADP binding (GO:0043531);;	--	--	--	--	--	--	S	Function unknown	hypothetical protein OsI_01334 [Oryza sativa Indica Group]
PB.207.1	LOC_Os01g16450.1	--	--	Molecular Function: peroxidase activity (GO:0004601);; Biological Process: response to oxidative stress (GO:0006979);; Cellular Component: cytoplasmic membrane-bounded vesicle (GO:0016023);; Molecular Function: heme binding (GO:0020037);; Molecular Function: metal ion binding (GO:0046872);; Biological Process: oxidation-reduction process (GO:0055114);;	--	--	--	--	Peroxidase	Peroxidase 24 (Precursor) GN=T7F6.21 OS=Arabidopsis thaliana (Mouse-ear cress) PE=2 SV=1	S	Function unknown	Os01g0270300 [Oryza sativa Japonica Group]
PB.208.1	LOC_Os01g16540.1	[H]	Coenzyme transport and metabolism	Molecular Function: ATP binding (GO:0005524);; Molecular Function: acid-amino acid ligase activity (GO:0016881);; Molecular Function: NEDD8 activating enzyme activity (GO:0019781);; Biological Process: protein neddylation (GO:0045116);; Molecular Function: protein heterodimerization activity (GO:0046982);;	K10686|0|osa:4325169|Os01g0271500; K10686 ubiquitin-activating enzyme E1 C [EC:6.3.2.19] (A)	ko04120:Ubiquitin mediated proteolysis	[O]	Posttranslational modification, protein turnover, chaperones	ThiF family;; Repeat in ubiquitin-activating (UBA) protein;; E2 binding domain;; Ubiquitin-activating enzyme active site	NEDD8-activating enzyme E1 catalytic subunit GN=ECR1 OS=Arabidopsis thaliana (Mouse-ear cress) PE=1 SV=2	H	Coenzyme transport and metabolism	Os01g0271500 [Oryza sativa Japonica Group]
PB.209.1	LOC_Os01g16900.1	[CE]	--	Molecular Function: magnesium ion binding (GO:0000287);; Molecular Function: isocitrate dehydrogenase (NAD+) activity (GO:0004449);; Molecular Function: ATP binding (GO:0005524);; Cellular Component: mitochondrion (GO:0005739);; Biological Process: tricarboxylic acid cycle (GO:0006099);; Biological Process: isocitrate metabolic process (GO:0006102);; Molecular Function: zinc ion binding (GO:00082…	K00030|0|osa:4324442|Os01g0276100; K00030 isocitrate dehydrogenase (NAD+) [EC:1.1.1.41] (A)	ko00020:Citrate cycle (TCA cycle);ko01200:Carbon metabolism;ko01210:2-Oxocarboxylic acid metabolism;ko01230:Biosynthesis of amino acids	[E]	Amino acid transport and metabolism	Isocitrate/isopropylmalate dehydrogenase	Isocitrate dehydrogenase [NAD] catalytic subunit 5, mitochondrial (Precursor) GN=IDH5 OS=Arabidopsis thaliana (Mouse-ear cress) PE=2 SV=1	E	Amino acid transport and metabolism	Os01g0276100 [Oryza sativa Japonica Group]
PB.210.1	LOC_Os01g17020.1	--	--	Cellular Component: membrane (GO:0016020);;	--	--	--	--	--	--	S	Function unknown	Os01g0277700 [Oryza sativa Japonica Group]
PB.211.1	LOC_Os01g17150.1	--	--	Cellular Component: ribosome (GO:0005840);; Cellular Component: chloroplast thylakoid membrane (GO:0009535);; Cellular Component: chloroplast envelope (GO:0009941);; Biological Process: plastid translation (GO:0032544);;	--	--	--	--	--	--	S	Function unknown	Os01g0278900 [Oryza sativa Japonica Group]
PB.212.1	LOC_Os01g17170.1	--	--	Molecular Function: DNA binding (GO:0003677);; Molecular Function: iron ion binding (GO:0005506);; Biological Process: rRNA processing (GO:0006364);; Biological Process: unsaturated fatty acid biosynthetic process (GO:0006636);; Biological Process: response to light stimulus (GO:0009416);; Cellular Component: chloroplast thylakoid membrane (GO:0009535);; Cellular Component: chloroplast inner memb…	K04035|0|osa:4326901|Os01g0279100; K04035 magnesium-protoporphyrin IX monomethyl ester (oxidative) cyclase [EC:1.14.13.81] (A)	ko00860:Porphyrin and chlorophyll metabolism	--	--	Rubrerythrin	Magnesium-protoporphyrin IX monomethyl ester [oxidative] cyclase, chloroplastic (Precursor) GN=CRD1 OS=Hordeum vulgare (Barley) PE=1 SV=1	H	Coenzyme transport and metabolism	Os01g0279100 [Oryza sativa Japonica Group]
PB.213.1	PB.213.1	[O]	Posttranslational modification, protein turnover, chaperones	Biological Process: mitotic G2 phase (GO:0000085);; Cellular Component: cytosol (GO:0005829);; Cellular Component: COP9 signalosome (GO:0008180);; Biological Process: photomorphogenesis (GO:0009640);; Biological Process: cullin deneddylation (GO:0010388);; Biological Process: protein catabolic process (GO:0030163);;	K12176|0|osa:4326902|Os01g0279200; K12176 COP9 signalosome complex subunit 2 (A)	--	[OT]	--	PCI domain;; COP9 signalosome, subunit CSN8	COP9 signalosome complex subunit 2 GN=T20P8.4 OS=Arabidopsis thaliana (Mouse-ear cress) PE=1 SV=1	O	Posttranslational modification, protein turnover, chaperones	Os01g0279200 [Oryza sativa Japonica Group]
PB.214.1	LOC_Os01g17190.1	[TZDR]	--	Molecular Function: calcium ion binding (GO:0005509);; Cellular Component: vacuole (GO:0005773);; Cellular Component: plasma membrane (GO:0005886);; Biological Process: pollen germination (GO:0009846);; Biological Process: regulation of photomorphogenesis (GO:0010099);; Biological Process: calcium-mediated signaling (GO:0019722);;	K02183|4.54831e-103|osa:4326903|Os01g0279300; K02183 calmodulin (A)	ko04070:Phosphatidylinositol signaling system;ko04626:Plant-pathogen interaction	[T]	Signal transduction mechanisms	EF hand;; EF-hand domain pair;; EF-hand domain pair;; EF-hand domain;; EF hand;; EF-hand domain;; Cytoskeletal-regulatory complex EF hand;; Secreted protein acidic and rich in cysteine Ca binding region;; Uncharacterised protein family (UPF0154);; Ca2+ insensitive EF hand	Calmodulin-3 OS=Oryza sativa subsp. japonica (Rice) PE=3 SV=1	DTZ	--	Os01g0279300 [Oryza sativa Japonica Group]
PB.214.2	LOC_Os01g17190.1	[TZDR]	--	Molecular Function: calcium ion binding (GO:0005509);; Cellular Component: vacuole (GO:0005773);; Cellular Component: plasma membrane (GO:0005886);; Biological Process: pollen germination (GO:0009846);; Biological Process: regulation of photomorphogenesis (GO:0010099);; Biological Process: calcium-mediated signaling (GO:0019722);;	K02183|4.54831e-103|osa:4326903|Os01g0279300; K02183 calmodulin (A)	ko04070:Phosphatidylinositol signaling system;ko04626:Plant-pathogen interaction	[T]	Signal transduction mechanisms	EF hand;; EF-hand domain pair;; EF-hand domain pair;; EF-hand domain;; EF hand;; EF-hand domain;; Cytoskeletal-regulatory complex EF hand;; Secreted protein acidic and rich in cysteine Ca binding region;; Uncharacterised protein family (UPF0154);; Ca2+ insensitive EF hand	Calmodulin-3 OS=Oryza sativa subsp. japonica (Rice) PE=3 SV=1	DTZ	--	Os01g0279300 [Oryza sativa Japonica Group]
PB.215.1	LOC_Os01g17240.1	[GEPR]	--	Biological Process: MAPK cascade (GO:0000165);; Molecular Function: inorganic phosphate transmembrane transporter activity (GO:0005315);; Molecular Function: sugar:proton symporter activity (GO:0005351);; Biological Process: protein targeting to membrane (GO:0006612);; Molecular Function: organic anion transmembrane transporter activity (GO:0008514);; Cellular Component: chloroplast thylakoid mem…	--	--	[G]	Carbohydrate transport and metabolism	Major Facilitator Superfamily	Probable anion transporter 1, chloroplastic (Precursor) OS=Oryza sativa subsp. japonica (Rice) PE=2 SV=1	G	Carbohydrate transport and metabolism	Os01g0279700 [Oryza sativa Japonica Group]
PB.216.1	PB.216.1	--	--	Molecular Function: sequence-specific DNA binding transcription factor activity (GO:0003700);; Cellular Component: nucleus (GO:0005634);; Biological Process: regulation of transcription, DNA-templated (GO:0006355);; Molecular Function: sequence-specific DNA binding (GO:0043565);;	K14431|5.0174e-178|obr:102713217|transcription factor HBP-1b(c38)-like; K14431 transcription factor TGA (A)	ko04075:Plant hormone signal transduction	--	--	Seed dormancy control;; bZIP transcription factor;; Basic region leucine zipper	Transcription factor HBP-1b(c38) OS=Triticum aestivum (Wheat) PE=2 SV=1	K	Transcription	PREDICTED: transcription factor HBP-1b(c38)-like isoform X1 [Oryza brachyantha]
PB.217.1	LOC_Os01g17320.1	--	--	Molecular Function: DNA binding (GO:0003677);; Cellular Component: mitochondrion (GO:0005739);;	--	--	[R]	General function prediction only	Pentatricopeptide repeat domain;; PPR repeat;; PPR repeat family;; PPR repeat	Pentatricopeptide repeat-containing protein At1g80270, mitochondrial (Precursor) GN=At1g80270 OS=Arabidopsis thaliana (Mouse-ear cress) PE=2 SV=1	S	Function unknown	putative DNA-binding protein [Oryza sativa Japonica Group]
PB.218.1	LOC_Os01g17390.1	--	--	Molecular Function: ATP binding (GO:0005524);; Cellular Component: cytoplasmic membrane-bounded vesicle (GO:0016023);; Molecular Function: unfolded protein binding (GO:0051082);;	--	--	--	--	F-box domain	F-box protein At2g32560 GN=At2g32560 OS=Arabidopsis thaliana (Mouse-ear cress) PE=2 SV=1	S	Function unknown	Os01g0281000 [Oryza sativa Japonica Group]
PB.219.1	LOC_Os01g18070.1	[R]	General function prediction only	Cellular Component: mitochondrial respiratory chain complex I (GO:0005747);;	--	--	--	--	Bacterial transferase hexapeptide (six repeats)	Gamma carbonic anhydrase 1, mitochondrial (Precursor) OS=Arabidopsis thaliana (Mouse-ear cress) PE=1 SV=1	S	Function unknown	Os01g0283100 [Oryza sativa Japonica Group]
PB.220.1	LOC_Os01g18080.1	--	--	Cellular Component: cytoplasmic membrane-bounded vesicle (GO:0016023);;	--	--	--	--	--	--	--	--	Os01g0283300 [Oryza sativa Japonica Group]
PB.221.1	LOC_Os01g18120.1	[MG]	--	Molecular Function: cinnamoyl-CoA reductase activity (GO:0016621);; Biological Process: cellular metabolic process (GO:0044237);; Molecular Function: coenzyme binding (GO:0050662);; Biological Process: oxidation-reduction process (GO:0055114);;	--	--	[V]	Defense mechanisms	NAD dependent epimerase/dehydratase family;; 3-beta hydroxysteroid dehydrogenase/isomerase family;; NADH(P)-binding;; Male sterility protein;; NmrA-like family;; Polysaccharide biosynthesis protein	Cinnamoyl-CoA reductase 1 GN=T24D18.5 OS=Arabidopsis thaliana (Mouse-ear cress) PE=1 SV=1	M	Cell wall/membrane/envelope biogenesis	Os01g0283700 [Oryza sativa Japonica Group]
PB.222.1	LOC_Os01g18800.1	[RTKL]	--	Molecular Function: protein serine/threonine kinase activity (GO:0004674);; Molecular Function: protein tyrosine kinase activity (GO:0004713);; Molecular Function: ATP binding (GO:0005524);; Cellular Component: plasma membrane (GO:0005886);; Biological Process: protein phosphorylation (GO:0006468);; Biological Process: signal transduction (GO:0007165);; Biological Process: response to salt stress…	--	--	[T]	Signal transduction mechanisms	Protein kinase domain;; Protein tyrosine kinase;; NAF domain;; Kinase-like	CBL-interacting protein kinase 1 GN=P0706B05.31 OS=Oryza sativa subsp. japonica (Rice) PE=2 SV=1	T	Signal transduction mechanisms	Os01g0292200 [Oryza sativa Japonica Group]
PB.223.1	LOC_Os01g18850.3	--	--	Molecular Function: DNA binding (GO:0003677);; Cellular Component: nucleus (GO:0005634);; Biological Process: regulation of transcription, DNA-templated (GO:0006355);; Molecular Function: metal ion binding (GO:0046872);;	--	--	--	--	SBP domain	Squamosa promoter-binding-like protein 1 GN=P0706B05.40 OS=Oryza sativa subsp. japonica (Rice) PE=2 SV=1	S	Function unknown	Os01g0292900 [Oryza sativa Japonica Group]
PB.223.2	LOC_Os01g18850.3	--	--	Molecular Function: DNA binding (GO:0003677);; Cellular Component: nucleus (GO:0005634);; Biological Process: regulation of transcription, DNA-templated (GO:0006355);; Molecular Function: metal ion binding (GO:0046872);;	--	--	--	--	SBP domain	Squamosa promoter-binding-like protein 1 GN=P0706B05.40 OS=Oryza sativa subsp. japonica (Rice) PE=2 SV=1	S	Function unknown	Os01g0292900 [Oryza sativa Japonica Group]
PB.224.1	LOC_Os01g18880.2	--	--	--	--	--	--	--	Plant organelle RNA recognition domain	Protein ROOT PRIMORDIUM DEFECTIVE 1 GN=RPD1 OS=Arabidopsis thaliana (Mouse-ear cress) PE=1 SV=1	S	Function unknown	unknown protein [Oryza sativa Japonica Group]
PB.225.1	LOC_Os01g19150.1	[RTKL]	--	Molecular Function: protein serine/threonine kinase activity (GO:0004674);; Molecular Function: protein tyrosine kinase activity (GO:0004713);; Molecular Function: ATP binding (GO:0005524);; Cellular Component: cytosol (GO:0005829);; Biological Process: protein phosphorylation (GO:0006468);; Biological Process: meristem structural organization (GO:0009933);;	K03083|0|osa:4326720|Os01g0296100; K03083 glycogen synthase kinase 3 beta [EC:2.7.11.26] (A)	--	[G]	Carbohydrate transport and metabolism	Protein kinase domain;; Protein tyrosine kinase;; Kinase-like;; Choline/ethanolamine kinase	Shaggy-related protein kinase alpha GN=ASK1 OS=Arabidopsis thaliana (Mouse-ear cress) PE=1 SV=3	T	Signal transduction mechanisms	Os01g0296100 [Oryza sativa Japonica Group]
PB.225.2	LOC_Os01g19150.1	[RTKL]	--	Molecular Function: protein serine/threonine kinase activity (GO:0004674);; Molecular Function: protein tyrosine kinase activity (GO:0004713);; Molecular Function: ATP binding (GO:0005524);; Cellular Component: cytosol (GO:0005829);; Biological Process: protein phosphorylation (GO:0006468);; Biological Process: meristem structural organization (GO:0009933);;	K03083|0|osa:4326720|Os01g0296100; K03083 glycogen synthase kinase 3 beta [EC:2.7.11.26] (A)	--	[G]	Carbohydrate transport and metabolism	Protein kinase domain;; Protein tyrosine kinase;; Kinase-like;; Choline/ethanolamine kinase	Shaggy-related protein kinase alpha GN=ASK1 OS=Arabidopsis thaliana (Mouse-ear cress) PE=1 SV=3	T	Signal transduction mechanisms	Os01g0296100 [Oryza sativa Japonica Group]
PB.226.1	PB.226.1	[G]	Carbohydrate transport and metabolism	Molecular Function: hydrolase activity, hydrolyzing O-glycosyl compounds (GO:0004553);; Biological Process: carbohydrate metabolic process (GO:0005975);; Cellular Component: cytoplasmic membrane-bounded vesicle (GO:0016023);;	K15920|0|zma:100280070|putative O-Glycosyl hydrolase superfamily protein; K15920 beta-D-xylosidase 4 [EC:3.2.1.37] (A)	ko00500:Starch and sucrose metabolism;ko00520:Amino sugar and nucleotide sugar metabolism	--	--	Glycosyl hydrolase family 3 N terminal domain;; Glycosyl hydrolase family 3 C-terminal domain;; Fibronectin type III-like domain	Beta-D-xylosidase 4 (Precursor) GN=BXL4 OS=Arabidopsis thaliana (Mouse-ear cress) PE=1 SV=1	G	Carbohydrate transport and metabolism	putative alpha-L-arabinofuranosidase/beta-D- xylosidase isoenzyme ARA-I [Oryza sativa Japonica Group]
PB.227.1	LOC_Os01g19400.1	--	--	Cellular Component: mitochondrion (GO:0005739);;	--	--	--	--	IGR protein motif	--	S	Function unknown	Os01g0299400 [Oryza sativa Japonica Group]
PB.228.1	LOC_Os01g19480.1	--	--	Cellular Component: mitochondrion (GO:0005739);;	--	--	[R]	General function prediction only	Galactose oxidase, central domain;; Galactose oxidase, central domain;; Kelch motif;; Kelch motif;; Kelch motif;; Kelch motif	Coiled-coil domain-containing protein lobo homolog (Fragment) GN=FAP50 OS=Chlamydomonas reinhardtii (Chlamydomonas smithii) PE=2 SV=1	S	Function unknown	Os01g0300900 [Oryza sativa Japonica Group]
PB.229.1	PB.229.1	--	--	--	--	--	--	--	--	--	--	--	P0035H10.4 [Oryza sativa Japonica Group]
PB.230.1	PB.230.1	--	--	Cellular Component: mitochondrion (GO:0005739);; Cellular Component: plastid (GO:0009536);;	--	--	--	--	--	--	--	--	unnamed protein product [Oryza sativa Japonica Group]
PB.230.2	LOC_Os01g19630.2	--	--	Cellular Component: mitochondrion (GO:0005739);;	--	--	--	--	--	--	--	--	unnamed protein product [Oryza sativa Japonica Group]
PB.231.1	PB.231.1	--	--	Cellular Component: mitochondrion (GO:0005739);;	--	--	--	--	--	--	--	--	Os01g0302800 [Oryza sativa Japonica Group]
PB.232.1	LOC_Os01g19760.1	--	--	Cellular Component: integral component of membrane (GO:0016021);;	--	--	[S]	Function unknown	FAM91 N-terminus;; FAM91 C-terminus	--	S	Function unknown	Os01g0303200 [Oryza sativa Japonica Group]
PB.233.1	LOC_Os01g19820.2	[T]	Signal transduction mechanisms	Biological Process: response to stress (GO:0006950);;	--	--	--	--	Universal stress protein family	Universal stress protein A-like protein GN=At3g01520 OS=Arabidopsis thaliana (Mouse-ear cress) PE=1 SV=2	S	Function unknown	Os01g0303800 [Oryza sativa Japonica Group]
PB.234.1	LOC_Os01g19870.1	--	--	--	--	--	--	--	Protein of unknown function (DUF616)	--	S	Function unknown	unnamed protein product [Oryza sativa Japonica Group]
PB.235.1	PB.235.1	--	--	--	--	--	--	--	cAMP-regulated phosphoprotein/endosulfine conserved region	--	S	Function unknown	Os01g0305200 [Oryza sativa Japonica Group]
PB.237.1	LOC_Os01g20110.1	--	--	Cellular Component: chloroplast thylakoid membrane (GO:0009535);; Cellular Component: chloroplast envelope (GO:0009941);;	--	--	--	--	--	Uncharacterized protein At4g37920, chloroplastic (Precursor) GN=At4g37920 OS=Arabidopsis thaliana (Mouse-ear cress) PE=1 SV=2	S	Function unknown	Os01g0306800 [Oryza sativa Japonica Group]
PB.238.1	LOC_Os01g20840.1	--	--	Molecular Function: carboxylic ester hydrolase activity (GO:0004091);; Molecular Function: triglyceride lipase activity (GO:0004806);; Biological Process: lipid catabolic process (GO:0016042);;	--	--	[IOT]	--	Lipase (class 3);; Lipase 3 N-terminal region	--	S	Function unknown	Os01g0309900 [Oryza sativa Japonica Group]
PB.239.1	PB.239.1	[RTKL]	--	Molecular Function: protein serine/threonine kinase activity (GO:0004674);; Molecular Function: ATP binding (GO:0005524);; Cellular Component: mitochondrion (GO:0005739);; Biological Process: protein phosphorylation (GO:0006468);; Molecular Function: zinc ion binding (GO:0008270);;	--	--	[T]	Signal transduction mechanisms	Protein tyrosine kinase;; Protein kinase domain;; Protein kinase domain;; Protein tyrosine kinase	Pto-interacting protein 1 OS=Solanum lycopersicum (Tomato) PE=1 SV=2	T	Signal transduction mechanisms	Os01g0310400 [Oryza sativa Japonica Group]
PB.240.1	LOC_Os01g20910.1	--	--	Molecular Function: protein serine/threonine kinase activity (GO:0004674);; Molecular Function: ATP binding (GO:0005524);; Biological Process: protein phosphorylation (GO:0006468);; Molecular Function: zinc ion binding (GO:0008270);; Cellular Component: plastid (GO:0009536);;	--	--	[O]	Posttranslational modification, protein turnover, chaperones	Ring finger domain;; RING-H2 zinc finger;; Zinc finger, C3HC4 type (RING finger);; Zinc finger, C3HC4 type (RING finger);; Zinc finger, C3HC4 type (RING finger);; zinc-RING finger domain;; Anaphase-promoting complex subunit 11 RING-H2 finger	RING-H2 finger protein ATL64 GN=ATL64 OS=Arabidopsis thaliana (Mouse-ear cress) PE=2 SV=1	O	Posttranslational modification, protein turnover, chaperones	hypothetical protein OsI_01588 [Oryza sativa Indica Group]
PB.241.1	LOC_Os01g20940.1	[T]	Signal transduction mechanisms	Biological Process: inactivation of MAPK activity (GO:0000188);; Molecular Function: protein tyrosine phosphatase activity (GO:0004725);; Cellular Component: cytoplasm (GO:0005737);; Molecular Function: protein tyrosine/serine/threonine phosphatase activity (GO:0008138);; Molecular Function: zinc ion binding (GO:0008270);; Biological Process: response to abscisic acid (GO:0009737);; Biological Pr…	K14165|0|dosa:Os01t0311500-01|Os01g0311500; Similar to PHS1 (PROPYZAMIDE-HYPERSENSITIVE 1); phosphoprotein phosphatase/ protein tyrosine/serine/threonine phosphatase.; K14165 atypical dual specificity phosphatase [EC:3.1.3.16 3.1.3.48] (A)	--	[V]	Defense mechanisms	Actin-fragmin kinase, catalytic;; Dual specificity phosphatase, catalytic domain	Dual specificity protein phosphatase PHS1 GN=PHS1 OS=Arabidopsis thaliana (Mouse-ear cress) PE=1 SV=1	T	Signal transduction mechanisms	putative PROPYZAMIDE-HTPERSENSITIVE 1 [Oryza sativa Japonica Group]
PB.242.1	LOC_Os01g21034.1	--	--	Molecular Function: enzyme inhibitor activity (GO:0004857);; Cellular Component: plasma membrane (GO:0005886);; Cellular Component: plant-type cell wall (GO:0009505);; Biological Process: response to nematode (GO:0009624);; Cellular Component: cytoplasmic membrane-bounded vesicle (GO:0016023);; Molecular Function: pectinesterase activity (GO:0030599);; Biological Process: cell wall modification (…	K01051|0|osa:4327285|Os01g0312500; K01051 pectinesterase [EC:3.1.1.11] (A)	ko00040:Pentose and glucuronate interconversions;ko00500:Starch and sucrose metabolism	--	--	Pectinesterase;; Plant invertase/pectin methylesterase inhibitor	Pectinesterase 1 (Precursor) GN=PECS-1.1 OS=Citrus sinensis (Sweet orange) PE=2 SV=1	G	Carbohydrate transport and metabolism	hypothetical protein OsJ_01485 [Oryza sativa Japonica Group]
PB.243.1	LOC_Os01g21070.1	--	--	Cellular Component: extracellular region (GO:0005576);; Molecular Function: cellulase activity (GO:0008810);; Biological Process: response to nematode (GO:0009624);; Biological Process: cellulose catabolic process (GO:0030245);;	--	--	--	--	Glycosyl hydrolase family 9	Endoglucanase 3 (Precursor) GN=B1011A07.26 OS=Oryza sativa subsp. japonica (Rice) PE=2 SV=1	G	Carbohydrate transport and metabolism	Os01g0312800 [Oryza sativa Japonica Group]
PB.244.1	LOC_Os01g21120.1	--	--	Molecular Function: DNA binding (GO:0003677);; Molecular Function: sequence-specific DNA binding transcription factor activity (GO:0003700);; Cellular Component: nucleus (GO:0005634);; Biological Process: regulation of transcription, DNA-templated (GO:0006355);;	--	--	--	--	AP2 domain	Ethylene-responsive transcription factor ERF071 GN=ERF071 OS=Arabidopsis thaliana (Mouse-ear cress) PE=2 SV=1	K	Transcription	Os01g0313300 [Oryza sativa Japonica Group]
PB.245.1	PB.245.1	[I]	Lipid transport and metabolism	Cellular Component: plasma membrane (GO:0005886);;	--	--	[I]	Lipid transport and metabolism	Putative lysophospholipase;; Alpha/beta hydrolase family;; Alpha/beta hydrolase family;; Prolyl oligopeptidase family;; Acetyl xylan esterase (AXE1)	Caffeoylshikimate esterase GN=CSE OS=Arabidopsis thaliana (Mouse-ear cress) PE=1 SV=1	I	Lipid transport and metabolism	hypothetical protein OsI_01608 [Oryza sativa Indica Group]
PB.246.1	PB.246.1	[R]	General function prediction only	Molecular Function: nucleotide binding (GO:0000166);; Molecular Function: nucleic acid binding (GO:0003676);; Cellular Component: mitochondrion (GO:0005739);; Cellular Component: nuclear speck (GO:0016607);; Cellular Component: interchromatin granule (GO:0035061);;	K12890|4.34476e-100|obr:102701405|pre-mRNA-splicing factor SF2-like; K12890 splicing factor, arginine/serine-rich 1/9 (A)	ko03040:Spliceosome	[A]	RNA processing and modification	RNA recognition motif. (a.k.a. RRM, RBD, or RNP domain);; RNA recognition motif. (a.k.a. RRM, RBD, or RNP domain);; RNA recognition motif (a.k.a. RRM, RBD, or RNP domain)	Serine/arginine-rich-splicing factor SR34 OS=Arabidopsis thaliana (Mouse-ear cress) PE=1 SV=1	S	Function unknown	hypothetical protein OsI_01613 [Oryza sativa Indica Group]
PB.247.1	PB.247.1	--	--	--	--	--	--	--	DSS1/SEM1 family	--	--	--	--
PB.247.2	PB.247.2	--	--	--	--	--	--	--	DSS1/SEM1 family	--	--	--	--
PB.248.1	LOC_Os01g21450.3	--	--	--	--	--	--	--	--	--	S	Function unknown	hypothetical protein OsJ_01508 [Oryza sativa Japonica Group]
PB.249.1	PB.249.1	--	--	Biological Process: response to hypoxia (GO:0001666);; Molecular Function: sequence-specific DNA binding transcription factor activity (GO:0003700);; Biological Process: regulation of transcription, DNA-templated (GO:0006355);; Biological Process: determination of bilateral symmetry (GO:0009855);; Biological Process: systemic acquired resistance, salicylic acid mediated signaling pathway (GO:0009…	--	--	--	--	--	--	S	Function unknown	Os01g0318400 [Oryza sativa Japonica Group]
PB.250.1	LOC_Os01g21630.1	--	--	Cellular Component: cytoplasmic membrane-bounded vesicle (GO:0016023);; Molecular Function: hydrolase activity (GO:0016787);;	--	--	[M]	Cell wall/membrane/envelope biogenesis	Pectinacetylesterase	--	S	Function unknown	Os01g0319000 [Oryza sativa Japonica Group]
PB.251.1	LOC_Os01g21960.1	[RTKL]	--	Molecular Function: protein serine/threonine kinase activity (GO:0004674);; Molecular Function: protein tyrosine kinase activity (GO:0004713);; Molecular Function: ATP binding (GO:0005524);; Cellular Component: plasma membrane (GO:0005886);; Biological Process: protein phosphorylation (GO:0006468);; Cellular Component: plastid (GO:0009536);;	--	--	[T]	Signal transduction mechanisms	Protein kinase domain;; Protein tyrosine kinase	Probable receptor-like protein kinase At5g18500 GN=At5g18500 OS=Arabidopsis thaliana (Mouse-ear cress) PE=2 SV=1	T	Signal transduction mechanisms	Os01g0323000 [Oryza sativa Japonica Group]
PB.251.2	LOC_Os01g21960.1	[RTKL]	--	Molecular Function: protein serine/threonine kinase activity (GO:0004674);; Molecular Function: protein tyrosine kinase activity (GO:0004713);; Molecular Function: ATP binding (GO:0005524);; Cellular Component: plasma membrane (GO:0005886);; Biological Process: protein phosphorylation (GO:0006468);; Cellular Component: plastid (GO:0009536);;	--	--	[T]	Signal transduction mechanisms	Protein kinase domain;; Protein tyrosine kinase	Probable receptor-like protein kinase At5g18500 GN=At5g18500 OS=Arabidopsis thaliana (Mouse-ear cress) PE=2 SV=1	T	Signal transduction mechanisms	Os01g0323000 [Oryza sativa Japonica Group]
PB.252.1	LOC_Os01g22230.1	--	--	Molecular Function: peroxidase activity (GO:0004601);; Cellular Component: extracellular region (GO:0005576);; Cellular Component: vacuole (GO:0005773);; Molecular Function: heme binding (GO:0020037);; Biological Process: hydrogen peroxide catabolic process (GO:0042744);; Molecular Function: metal ion binding (GO:0046872);; Biological Process: oxidation-reduction process (GO:0055114);;	--	--	--	--	Peroxidase	Peroxidase 1 (Precursor) GN=PER1 OS=Zea mays (Maize) PE=1 SV=1	P	Inorganic ion transport and metabolism	Os01g0326000 [Oryza sativa Japonica Group]
PB.253.1	LOC_Os01g22352.1	--	--	Molecular Function: peroxidase activity (GO:0004601);; Biological Process: response to oxidative stress (GO:0006979);; Cellular Component: cytoplasmic membrane-bounded vesicle (GO:0016023);; Molecular Function: heme binding (GO:0020037);; Molecular Function: metal ion binding (GO:0046872);; Biological Process: oxidation-reduction process (GO:0055114);;	--	--	--	--	Peroxidase	Peroxidase 1 (Precursor) GN=PER1 OS=Zea mays (Maize) PE=1 SV=1	S	Function unknown	Os01g0327100 [Oryza sativa Japonica Group]
PB.254.1	LOC_Os01g22370.1	--	--	Molecular Function: peroxidase activity (GO:0004601);; Biological Process: response to oxidative stress (GO:0006979);; Cellular Component: cytoplasmic membrane-bounded vesicle (GO:0016023);; Molecular Function: heme binding (GO:0020037);; Molecular Function: metal ion binding (GO:0046872);; Biological Process: oxidation-reduction process (GO:0055114);;	K00430|0|osa:4326970|Os01g0327400; K00430 peroxidase [EC:1.11.1.7] (A)	ko00360:Phenylalanine metabolism;ko00940:Phenylpropanoid biosynthesis	--	--	Peroxidase	Peroxidase 1 (Precursor) GN=PER1 OS=Zea mays (Maize) PE=1 SV=1	G	Carbohydrate transport and metabolism	Os01g0327400 [Oryza sativa Japonica Group]
PB.255.1	LOC_Os01g22500.1	--	--	--	--	--	[S]	Function unknown	Bucentaur or craniofacial development	--	S	Function unknown	Os01g0328500 [Oryza sativa Japonica Group]
PB.256.1	LOC_Os01g22640.1	--	--	Cellular Component: mitochondrion (GO:0005739);; Biological Process: lipid metabolic process (GO:0006629);; Cellular Component: chloroplast stroma (GO:0009570);; Molecular Function: hydrolase activity, acting on ester bonds (GO:0016788);;	--	--	--	--	GDSL-like Lipase/Acylhydrolase	GDSL esterase/lipase At1g09390 (Precursor) GN=At1g09390 OS=Arabidopsis thaliana (Mouse-ear cress) PE=2 SV=1	S	Function unknown	Os01g0329900 [Oryza sativa Japonica Group]
PB.257.1	LOC_Os01g22660.1	--	--	Cellular Component: mitochondrion (GO:0005739);; Biological Process: lipid metabolic process (GO:0006629);; Cellular Component: chloroplast stroma (GO:0009570);; Molecular Function: hydrolase activity, acting on ester bonds (GO:0016788);;	--	--	--	--	GDSL-like Lipase/Acylhydrolase	GDSL esterase/lipase LIP-4 (Precursor) GN=LIP4 OS=Arabidopsis thaliana (Mouse-ear cress) PE=2 SV=1	S	Function unknown	hypothetical protein OsJ_01574 [Oryza sativa Japonica Group]
PB.258.1	LOC_Os01g22780.1	--	--	Cellular Component: mitochondrion (GO:0005739);; Biological Process: lipid metabolic process (GO:0006629);; Cellular Component: chloroplast stroma (GO:0009570);; Cellular Component: cytoplasmic membrane-bounded vesicle (GO:0016023);; Molecular Function: hydrolase activity, acting on ester bonds (GO:0016788);;	--	--	--	--	GDSL-like Lipase/Acylhydrolase	GDSL esterase/lipase LIP-4 (Precursor) GN=LIP4 OS=Arabidopsis thaliana (Mouse-ear cress) PE=2 SV=1	S	Function unknown	putative lipase homolog [Oryza sativa Japonica Group]
PB.259.1	LOC_Os01g22870.1	--	--	Cellular Component: endosome (GO:0005768);; Cellular Component: Golgi apparatus (GO:0005794);; Cellular Component: trans-Golgi network (GO:0005802);; Biological Process: Golgi organization (GO:0007030);; Biological Process: protein secretion (GO:0009306);; Biological Process: unidimensional cell growth (GO:0009826);; Cellular Component: integral component of membrane (GO:0016021);; Cellular Compo…	--	--	[R]	General function prediction only	Eukaryotic protein of unknown function (DUF846)	Golgi apparatus membrane protein-like protein ECHIDNA GN=ECH OS=Arabidopsis thaliana (Mouse-ear cress) PE=1 SV=1	U	Intracellular trafficking, secretion, and vesicular transport	Os01g0331900 [Oryza sativa Japonica Group]
PB.260.1	LOC_Os01g22900.1	--	--	Cellular Component: mitochondrion (GO:0005739);; Biological Process: metabolic process (GO:0008152);; Molecular Function: glycopeptide alpha-N-acetylgalactosaminidase activity (GO:0033926);;	--	--	--	--	Alkaline and neutral invertase;; Amylo-alpha-1,6-glucosidase	Neutral/alkaline invertase 1, mitochondrial {ECO:0000305} (Precursor) OS=Oryza sativa subsp. japonica (Rice) PE=1 SV=1	S	Function unknown	Os01g0332100 [Oryza sativa Japonica Group]
PB.261.1	LOC_Os01g22954.1	[E]	Amino acid transport and metabolism	Molecular Function: serine-type carboxypeptidase activity (GO:0004185);; Biological Process: proteolysis (GO:0006508);;	K16297|0|osa:4326839|Os01g0332500; K16297 serine carboxypeptidase-like clade II [EC:3.4.16.-] (A)	--	[OE]	--	Serine carboxypeptidase	Serine carboxypeptidase-like 33 (Precursor) GN=SCPL33 OS=Arabidopsis thaliana (Mouse-ear cress) PE=2 SV=2	E	Amino acid transport and metabolism	Os01g0332500 [Oryza sativa Japonica Group]
PB.262.1	LOC_Os01g23610.1	[C]	Energy production and conversion	Cellular Component: gamma-tubulin complex (GO:0000930);; Molecular Function: GTPase activity (GO:0003924);; Molecular Function: dihydrolipoyl dehydrogenase activity (GO:0004148);; Molecular Function: GTP binding (GO:0005525);; Cellular Component: microtubule (GO:0005874);; Biological Process: GTP catabolic process (GO:0006184);; Biological Process: microtubule nucleation (GO:0007020);; Cellular C…	K00382|0|osa:4326849|Os01g0337900; K00382 dihydrolipoamide dehydrogenase [EC:1.8.1.4] (A)	ko00010:Glycolysis / Gluconeogenesis;ko00020:Citrate cycle (TCA cycle);ko00260:Glycine, serine and threonine metabolism;ko00280:Valine, leucine and isoleucine degradation;ko00620:Pyruvate metabolism;ko01200:Carbon metabolism	[C]	Energy production and conversion	Pyridine nucleotide-disulphide oxidoreductase;; Pyridine nucleotide-disulphide oxidoreductase, dimerisation domain;; Pyridine nucleotide-disulphide oxidoreductase;; FAD binding domain;; FAD dependent oxidoreductase;; Glucose inhibited division protein A;; Pyridine nucleotide-disulphide oxidoreductase;; L-lysine 6-monooxygenase (NADPH-requiring)	Dihydrolipoyl dehydrogenase 1, chloroplastic (Precursor) GN=LPD1 OS=Arabidopsis thaliana (Mouse-ear cress) PE=2 SV=1	C	Energy production and conversion	Os01g0337900 [Oryza sativa Japonica Group]
PB.263.1	LOC_Os01g23620.1	[R]	General function prediction only	Molecular Function: transporter activity (GO:0005215);; Molecular Function: GTP binding (GO:0005525);; Cellular Component: endoplasmic reticulum (GO:0005783);; Cellular Component: Golgi apparatus (GO:0005794);; Cellular Component: cytosol (GO:0005829);; Cellular Component: plasma membrane (GO:0005886);; Biological Process: intracellular protein transport (GO:0006886);; Biological Process: ER to G…	K07953|2.38501e-112|osa:4326797|Os01g0338000; K07953 GTP-binding protein SAR1 [EC:3.6.5.-] (A)	ko04141:Protein processing in endoplasmic reticulum	[U]	Intracellular trafficking, secretion, and vesicular transport	ADP-ribosylation factor family;; Signal recognition particle receptor beta subunit;; Miro-like protein;; 50S ribosome-binding GTPase;; Ras family	GTP-binding protein SAR1A GN=SAR1A OS=Arabidopsis thaliana (Mouse-ear cress) PE=2 SV=1	U	Intracellular trafficking, secretion, and vesicular transport	Os01g0338000 [Oryza sativa Japonica Group]
PB.264.1	LOC_Os01g23740.1	[OC]	--	Molecular Function: protein disulfide isomerase activity (GO:0003756);; Cellular Component: extracellular region (GO:0005576);; Cellular Component: endoplasmic reticulum (GO:0005783);; Cellular Component: plasma membrane (GO:0005886);; Biological Process: protein folding (GO:0006457);; Biological Process: glycerol ether metabolic process (GO:0006662);; Molecular Function: electron carrier activit…	K09584|0|osa:4326806|Os01g0339900; K09584 protein disulfide-isomerase A6 [EC:5.3.4.1] (A)	ko04141:Protein processing in endoplasmic reticulum	[O]	Posttranslational modification, protein turnover, chaperones	Thioredoxin;; Endoplasmic reticulum protein ERp29, C-terminal domain;; Thioredoxin-like domain;; Thioredoxin-like;; Thioredoxin-like;; Thioredoxin-like domain;; AhpC/TSA family;; Redoxin	Protein disulfide isomerase-like 2-2 (Precursor) OS=Oryza sativa subsp. japonica (Rice) PE=2 SV=1	O	Posttranslational modification, protein turnover, chaperones	Os01g0339900 [Oryza sativa Japonica Group]
PB.265.1	PB.265.1	--	--	Biological Process: protein folding (GO:0006457);; Molecular Function: cytoskeletal protein binding (GO:0008092);; Biological Process: positive gravitropism (GO:0009958);; Molecular Function: heat shock protein binding (GO:0031072);; Molecular Function: unfolded protein binding (GO:0051082);;	--	--	[O]	Posttranslational modification, protein turnover, chaperones	--	Chaperone protein dnaJ 15 GN=T2E12.8 OS=Arabidopsis thaliana (Mouse-ear cress) PE=1 SV=1	--	--	hypothetical protein OsI_38477 [Oryza sativa Indica Group]
PB.266.1	PB.266.1	[U]	Intracellular trafficking, secretion, and vesicular transport	Cellular Component: nucleus (GO:0005634);; Biological Process: protein import into nucleus (GO:0006606);; Molecular Function: protein transporter activity (GO:0008565);; Cellular Component: perinuclear region of cytoplasm (GO:0048471);;	--	--	[U]	Intracellular trafficking, secretion, and vesicular transport	Armadillo/beta-catenin-like repeat;; HEAT repeats;; HEAT-like repeat;; Importin beta binding domain;; HEAT repeat;; Armadillo-like;; Adaptin N terminal region;; V-ATPase subunit H	Importin subunit alpha-1b OS=Oryza sativa subsp. japonica (Rice) PE=1 SV=2	U	Intracellular trafficking, secretion, and vesicular transport	Os01g0343200 [Oryza sativa Japonica Group]
PB.267.1	PB.267.1	[I]	Lipid transport and metabolism	Molecular Function: 3-hydroxyacyl-CoA dehydrogenase activity (GO:0003857);; Molecular Function: enoyl-CoA hydratase activity (GO:0004300);; Cellular Component: cell wall (GO:0005618);; Cellular Component: nucleolus (GO:0005730);; Biological Process: fatty acid beta-oxidation (GO:0006635);; Molecular Function: coenzyme binding (GO:0050662);;	K10527|0|osa:4326503|Os01g0348600; K10527 enoyl-CoA hydratase/3-hydroxyacyl-CoA dehydrogenase [EC:4.2.1.17 1.1.1.35 1.1.1.211] (A)	ko00071:Fatty acid degradation;ko00592:alpha-Linolenic acid metabolism;ko01212:Fatty acid metabolism	[I]	Lipid transport and metabolism	3-hydroxyacyl-CoA dehydrogenase, NAD binding domain;; Enoyl-CoA hydratase/isomerase family;; 3-hydroxyacyl-CoA dehydrogenase, C-terminal domain;; 3-hydroxyacyl-CoA dehydrogenase, C-terminal domain	3-hydroxyacyl-CoA dehydrogenase OS=Cucumis sativus (Cucumber) PE=1 SV=1	I	Lipid transport and metabolism	Os01g0348600 [Oryza sativa Japonica Group]
PB.268.1	LOC_Os01g24690.1	[J]	Translation, ribosomal structure and biogenesis	Molecular Function: nucleotide binding (GO:0000166);; Molecular Function: RNA binding (GO:0003723);; Molecular Function: structural constituent of ribosome (GO:0003735);; Cellular Component: cell wall (GO:0005618);; Cellular Component: nucleolus (GO:0005730);; Biological Process: translation (GO:0006412);; Biological Process: response to oxidative stress (GO:0006979);; Biological Process: respons…	K02893|1.99455e-72|osa:4326469|Os01g0348700; K02893 large subunit ribosomal protein L23Ae (A)	ko03010:Ribosome	[J]	Translation, ribosomal structure and biogenesis	Ribosomal protein L23, N-terminal domain;; Ribosomal protein L23	60S ribosomal protein L23A GN=RPL23A OS=Fritillaria agrestis (Stinkbells) PE=2 SV=1	J	Translation, ribosomal structure and biogenesis	Os01g0348700 [Oryza sativa Japonica Group]
PB.269.1	LOC_Os01g24790.1	--	--	Molecular Function: transferase activity, transferring acyl groups other than amino-acyl groups (GO:0016747);;	--	--	--	--	Transferase family	Benzyl alcohol O-benzoyltransferase GN=HSR201 OS=Nicotiana tabacum (Common tobacco) PE=1 SV=1	S	Function unknown	Os01g0350000 [Oryza sativa Japonica Group]
PB.270.1	PB.270.1	--	--	Cellular Component: exocyst (GO:0000145);; Molecular Function: nucleic acid binding (GO:0003676);; Molecular Function: NAD+ ADP-ribosyltransferase activity (GO:0003950);; Cellular Component: mitochondrion (GO:0005739);; Cellular Component: cytosol (GO:0005829);; Cellular Component: plasma membrane (GO:0005886);; Biological Process: protein ADP-ribosylation (GO:0006471);; Biological Process: prote…	--	--	[U]	Intracellular trafficking, secretion, and vesicular transport	Exocyst complex subunit Sec15-like	Exocyst complex component SEC15B GN=SEC15B OS=Arabidopsis thaliana (Mouse-ear cress) PE=1 SV=1	U	Intracellular trafficking, secretion, and vesicular transport	Os01g0351300 [Oryza sativa Japonica Group]
PB.271.1	LOC_Os01g25330.1	--	--	Biological Process: protein glycosylation (GO:0006486);; Biological Process: response to osmotic stress (GO:0006970);; Biological Process: response to cold (GO:0009409);; Biological Process: response to high light intensity (GO:0009644);; Molecular Function: phosphoric ester hydrolase activity (GO:0042578);; Biological Process: phosphatidylinositol metabolic process (GO:0046488);; Biological Proc…	--	--	[I]	Lipid transport and metabolism	--	Probable phosphoinositide phosphatase SAC9 GN=F24G16.40 OS=Arabidopsis thaliana (Mouse-ear cress) PE=1 SV=1	T	Signal transduction mechanisms	Os01g0355600 [Oryza sativa Japonica Group]
PB.272.1	LOC_Os01g25484.1	[P]	Inorganic ion transport and metabolism	Cellular Component: mitochondrion (GO:0005739);; Cellular Component: chloroplast stroma (GO:0009570);; Biological Process: response to nitrate (GO:0010167);; Biological Process: nitrate transport (GO:0015706);; Cellular Component: membrane (GO:0016020);; Biological Process: cysteine biosynthetic process (GO:0019344);; Molecular Function: heme binding (GO:0020037);; Biological Process: electron tr…	K00366|0|osa:4326014|Os01g0357100; K00366 ferredoxin-nitrite reductase [EC:1.7.7.1] (A)	ko00910:Nitrogen metabolism	[P]	Inorganic ion transport and metabolism	Nitrite and sulphite reductase 4Fe-4S domain;; Nitrite/Sulfite reductase ferredoxin-like half domain	Ferredoxin--nitrite reductase, chloroplastic (Precursor) OS=Oryza sativa subsp. japonica (Rice) PE=2 SV=1	C	Energy production and conversion	putative ferredoxin--nitrite reductase, chloroplast precursor [Oryza sativa Japonica Group]
PB.272.2	LOC_Os01g25484.1	[P]	Inorganic ion transport and metabolism	Cellular Component: mitochondrion (GO:0005739);; Cellular Component: chloroplast stroma (GO:0009570);; Biological Process: response to nitrate (GO:0010167);; Biological Process: nitrate transport (GO:0015706);; Cellular Component: membrane (GO:0016020);; Biological Process: cysteine biosynthetic process (GO:0019344);; Molecular Function: heme binding (GO:0020037);; Biological Process: electron tr…	K00366|0|osa:4326014|Os01g0357100; K00366 ferredoxin-nitrite reductase [EC:1.7.7.1] (A)	ko00910:Nitrogen metabolism	[P]	Inorganic ion transport and metabolism	Nitrite and sulphite reductase 4Fe-4S domain;; Nitrite/Sulfite reductase ferredoxin-like half domain	Ferredoxin--nitrite reductase, chloroplastic (Precursor) OS=Oryza sativa subsp. japonica (Rice) PE=2 SV=1	C	Energy production and conversion	putative ferredoxin--nitrite reductase, chloroplast precursor [Oryza sativa Japonica Group]
PB.273.1	LOC_Os01g25610.1	[J]	Translation, ribosomal structure and biogenesis	Molecular Function: structural constituent of ribosome (GO:0003735);; Cellular Component: nucleolus (GO:0005730);; Cellular Component: mitochondrion (GO:0005739);; Cellular Component: plasma membrane (GO:0005886);; Biological Process: translation (GO:0006412);; Cellular Component: chloroplast (GO:0009507);; Cellular Component: small ribosomal subunit (GO:0015935);; Molecular Function: rRNA bindin…	K02987|3.78155e-171|osa:4326022|Os01g0358400; K02987 small subunit ribosomal protein S4e (A)	ko03010:Ribosome	[J]	Translation, ribosomal structure and biogenesis	Ribosomal family S4e;; RS4NT (NUC023) domain;; KOW motif;; S4 domain	40S ribosomal protein S4 GN=OJ1359_D06.12 OS=Oryza sativa subsp. japonica (Rice) PE=2 SV=3	J	Translation, ribosomal structure and biogenesis	Os01g0358400 [Oryza sativa Japonica Group]
PB.274.1	PB.274.1	--	--	Cellular Component: mitochondrion (GO:0005739);;	--	--	--	--	--	--	S	Function unknown	hypothetical protein OsI_01897 [Oryza sativa Indica Group]
PB.275.1	LOC_Os01g26070.1	--	--	--	--	--	--	--	--	--	--	--	Os01g0362400 [Oryza sativa Japonica Group]
PB.276.1	PB.276.1	--	--	--	--	--	--	--	--	--	--	--	Os01g0364900 [Oryza sativa Japonica Group]
PB.277.1	LOC_Os01g27020.3	[RTKL]	--	Molecular Function: protein serine/threonine kinase activity (GO:0004674);; Molecular Function: ATP binding (GO:0005524);; Biological Process: protein phosphorylation (GO:0006468);; Cellular Component: plastid (GO:0009536);;	K08819|0|osa:4325730|Os01g0367700; K08819 cyclin-dependent kinase 12/13 [EC:2.7.11.22 2.7.11.23] (A)	--	[D]	Cell cycle control, cell division, chromosome partitioning	Protein kinase domain;; Protein tyrosine kinase	Probable serine/threonine-protein kinase At1g54610 GN=At1g54610 OS=Arabidopsis thaliana (Mouse-ear cress) PE=1 SV=1	T	Signal transduction mechanisms	putative CRK1 protein [Oryza sativa Japonica Group]
PB.278.1	LOC_Os01g27160.1	[O]	Posttranslational modification, protein turnover, chaperones	Cellular Component: condensed nuclear chromosome (GO:0000794);; Cellular Component: spindle (GO:0005819);; Biological Process: ubiquitin-dependent protein catabolic process (GO:0006511);; Cellular Component: phragmoplast (GO:0009524);; Biological Process: response to auxin (GO:0009733);; Biological Process: response to jasmonic acid (GO:0009753);; Biological Process: embryo development ending in …	K03347|0|osa:4325736|Os01g0369200; K03347 cullin 1 (A)	ko04120:Ubiquitin mediated proteolysis;ko04141:Protein processing in endoplasmic reticulum	[D]	Cell cycle control, cell division, chromosome partitioning	Cullin family;; Cullin protein neddylation domain	Cullin-1 GN=CUL1 OS=Arabidopsis thaliana (Mouse-ear cress) PE=1 SV=1	O	Posttranslational modification, protein turnover, chaperones	Os01g0369200 [Oryza sativa Japonica Group]
PB.279.1	LOC_Os01g27720.1	--	--	Molecular Function: zinc ion binding (GO:0008270);;	--	--	[O]	Posttranslational modification, protein turnover, chaperones	Zinc finger, C3HC4 type (RING finger);; Zinc finger, C3HC4 type (RING finger)	Probable E3 ubiquitin-protein ligase LUL2 GN=F4P12_110 OS=Arabidopsis thaliana (Mouse-ear cress) PE=2 SV=1	S	Function unknown	Os01g0374900 [Oryza sativa Japonica Group]
PB.280.1	LOC_Os01g27750.1	[E]	Amino acid transport and metabolism	Molecular Function: 3-dehydroquinate dehydratase activity (GO:0003855);; Molecular Function: shikimate 3-dehydrogenase (NADP+) activity (GO:0004764);; Cellular Component: chloroplast stroma (GO:0009570);; Cellular Component: cytoplasmic membrane-bounded vesicle (GO:0016023);; Biological Process: shikimate metabolic process (GO:0019632);; Molecular Function: NADP binding (GO:0050661);; Biological …	K13832|0|dosa:Os01t0375200-01|Os01g0375200; Similar to shikimate biosynthesis protein aroDE.; K13832 3-dehydroquinate dehydratase / shikimate dehydrogenase [EC:4.2.1.10 1.1.1.25] (A)	ko00400:Phenylalanine, tyrosine and tryptophan biosynthesis;ko01230:Biosynthesis of amino acids	[E]	Amino acid transport and metabolism	Type I 3-dehydroquinase;; Shikimate dehydrogenase substrate binding domain;; Shikimate / quinate 5-dehydrogenase;; FAD binding domain;; NADP oxidoreductase coenzyme F420-dependent	Shikimate dehydrogenase (Precursor) GN=EMB3004 OS=Arabidopsis thaliana (Mouse-ear cress) PE=1 SV=1	E	Amino acid transport and metabolism	putative dehydroquinate dehydratase [Oryza sativa Japonica Group]
PB.281.1	PB.281.1	--	--	Cellular Component: endoplasmic reticulum (GO:0005783);; Biological Process: proteasome-mediated ubiquitin-dependent protein catabolic process (GO:0043161);;	K14015|0|osa:4325451|Os01g0377700; K14015 nuclear protein localization protein 4 homolog (A)	ko04141:Protein processing in endoplasmic reticulum	[YU]	--	NPL4 family;; Nuclear pore localisation protein NPL4	NPL4-like protein GN=P0416G11.21-1 OS=Oryza sativa subsp. japonica (Rice) PE=2 SV=1	Y	Nuclear structure	Os01g0377700 [Oryza sativa Japonica Group]
PB.282.1	LOC_Os01g28680.12	[R]	General function prediction only	Molecular Function: nucleotide binding (GO:0000166);; Cellular Component: cytoplasm (GO:0005737);; Cellular Component: Cul4-RING E3 ubiquitin ligase complex (GO:0080008);;	K11801|0|obr:102701866|LEC14B protein-like; K11801 WD repeat-containing protein 23 (A)	--	[R]	General function prediction only	WD domain, G-beta repeat;; Cytochrome D1 heme domain	LEC14B protein OS=Lithospermum erythrorhizon (Purple gromwell) PE=2 SV=1	S	Function unknown	hypothetical protein OsI_02035 [Oryza sativa Indica Group]
PB.283.1	LOC_Os01g28690.1	--	--	Cellular Component: nuclear pore (GO:0005643);; Cellular Component: mitochondrion (GO:0005739);; Biological Process: transport (GO:0006810);; Cellular Component: plastid (GO:0009536);;	K14297|0|osa:4325429|Os01g0383900; K14297 nuclear pore complex protein Nup98-Nup96 (A)	ko03013:RNA transport	[YU]	--	Nucleoporin autopeptidase	Nuclear pore complex protein NUP98A {ECO:0000303|PubMed:21189294} OS=Arabidopsis thaliana (Mouse-ear cress) PE=1 SV=1	U	Intracellular trafficking, secretion, and vesicular transport	hypothetical protein OsJ_01873 [Oryza sativa Japonica Group]
PB.284.1	LOC_Os01g28790.1	--	--	Biological Process: pollen tube growth (GO:0009860);;	--	--	--	--	Proline-rich nuclear receptor coactivator	--	S	Function unknown	Os01g0384800 [Oryza sativa Japonica Group]
PB.286.1	LOC_Os01g28989.1	--	--	--	--	--	--	--	--	--	--	--	hypothetical protein OsI_02051 [Oryza sativa Indica Group]
PB.287.1	PB.287.1	[R]	General function prediction only	Cellular Component: nucleus (GO:0005634);; Cellular Component: mitochondrial matrix (GO:0005759);; Cellular Component: plastid (GO:0009536);; Biological Process: tRNA methylation (GO:0030488);; Molecular Function: tRNA (guanine(37)-N(1))-methyltransferase activity (GO:0052906);;	K15429|0|dosa:Os01t0390400-01|Os01g0390400; Similar to Met-10+ like family protein.; K15429 tRNA (guanine37-N1)-methyltransferase [EC:2.1.1.228] (A)	--	[A]	RNA processing and modification	Met-10+ like-protein;; N2,N2-dimethylguanosine tRNA methyltransferase;; Methyltransferase domain;; Methyltransferase small domain;; Ribosomal protein L11 methyltransferase (PrmA);; Conserved hypothetical protein 95	tRNA (guanine(37)-N1)-methyltransferase 1 {ECO:0000255|HAMAP-Rule:MF_03152} GN=VIT_19s0014g03930 OS=Vitis vinifera (Grape) PE=3 SV=1	S	Function unknown	putative tRNA-(N1G37) methyltransferase [Oryza sativa Japonica Group]
PB.288.1	PB.288.1	--	--	Molecular Function: catalytic activity (GO:0003824);; Cellular Component: mitochondrion (GO:0005739);; Biological Process: cellular protein modification process (GO:0006464);; Biological Process: post-embryonic development (GO:0009791);; Cellular Component: cytoplasmic membrane-bounded vesicle (GO:0016023);; Biological Process: small molecule metabolic process (GO:0044281);; Biological Process: s…	--	--	--	--	--	--	--	--	Os04g0169300 [Oryza sativa Japonica Group]
PB.289.1	PB.289.1	--	--	Molecular Function: DNA binding (GO:0003677);; Molecular Function: DNA-directed RNA polymerase activity (GO:0003899);; Biological Process: transcription, DNA-templated (GO:0006351);; Cellular Component: plastid (GO:0009536);;	--	--	--	--	--	--	S	Function unknown	hypothetical protein [Oryza sativa Japonica Group]
PB.290.1	LOC_Os01g29830.2	--	--	Cellular Component: plastid (GO:0009536);;	--	--	--	--	--	--	--	--	Os01g0393000 [Oryza sativa Japonica Group]
PB.291.1	LOC_Os01g31110.1	--	--	Biological Process: Group II intron splicing (GO:0000373);; Molecular Function: RNA binding (GO:0003723);; Biological Process: rRNA processing (GO:0006364);; Biological Process: mRNA processing (GO:0006397);; Biological Process: tRNA metabolic process (GO:0006399);; Cellular Component: chloroplast stroma (GO:0009570);; Biological Process: chloroplast organization (GO:0009658);; Cellular Component…	--	--	--	--	CRS1 / YhbY (CRM) domain	CRS2-associated factor 1, chloroplastic (Precursor) OS=Oryza sativa subsp. japonica (Rice) PE=2 SV=1	A	RNA processing and modification	Os01g0495900 [Oryza sativa Japonica Group]
PB.291.2	LOC_Os01g31110.1	--	--	Biological Process: Group II intron splicing (GO:0000373);; Molecular Function: RNA binding (GO:0003723);; Biological Process: rRNA processing (GO:0006364);; Biological Process: mRNA processing (GO:0006397);; Biological Process: tRNA metabolic process (GO:0006399);; Cellular Component: chloroplast stroma (GO:0009570);; Biological Process: chloroplast organization (GO:0009658);; Cellular Component…	--	--	--	--	CRS1 / YhbY (CRM) domain	CRS2-associated factor 1, chloroplastic (Precursor) OS=Oryza sativa subsp. japonica (Rice) PE=2 SV=1	A	RNA processing and modification	Os01g0495900 [Oryza sativa Japonica Group]
PB.292.1	PB.292.1	--	--	--	--	--	--	--	--	--	S	Function unknown	hypothetical protein OsJ_01911 [Oryza sativa Japonica Group]
PB.293.1	PB.293.1	--	--	Cellular Component: mitochondrion (GO:0005739);;	--	--	--	--	--	--	--	--	Os01g0500400 [Oryza sativa Japonica Group]
PB.294.1	LOC_Os01g31610.1	[J]	Translation, ribosomal structure and biogenesis	Molecular Function: RNA binding (GO:0003723);; Molecular Function: tyrosine-tRNA ligase activity (GO:0004831);; Molecular Function: ATP binding (GO:0005524);; Cellular Component: mitochondrion (GO:0005739);; Biological Process: tyrosyl-tRNA aminoacylation (GO:0006437);; Biological Process: phosphatidylglycerol biosynthetic process (GO:0006655);; Cellular Component: chloroplast stroma (GO:0009570)…	K01866|0|osa:4324476|Os01g0500900; K01866 tyrosyl-tRNA synthetase [EC:6.1.1.1] (A)	ko00970:Aminoacyl-tRNA biosynthesis	[J]	Translation, ribosomal structure and biogenesis	tRNA synthetases class I (W and Y);; S4 domain	--	J	Translation, ribosomal structure and biogenesis	Os01g0500900 [Oryza sativa Japonica Group]
PB.295.1	PB.295.1	--	--	Molecular Function: calcium ion binding (GO:0005509);; Cellular Component: plastid (GO:0009536);; Cellular Component: photosystem II oxygen evolving complex (GO:0009654);; Cellular Component: extrinsic component of membrane (GO:0019898);; Biological Process: photosystem II stabilization (GO:0042549);;	K02716|0|osa:4324479|Os01g0501800; K02716 photosystem II oxygen-evolving enhancer protein 1 (A)	ko00195:Photosynthesis	--	--	Manganese-stabilising protein / photosystem II polypeptide	Oxygen-evolving enhancer protein 1, chloroplastic (Precursor) GN=PSBO OS=Nicotiana tabacum (Common tobacco) PE=2 SV=1	G	Carbohydrate transport and metabolism	hypothetical protein OsI_02088 [Oryza sativa Indica Group]
PB.296.1	LOC_Os01g31770.1	--	--	Molecular Function: iron ion binding (GO:0005506);; Molecular Function: oxidoreductase activity, acting on paired donors, with incorporation or reduction of molecular oxygen, 2-oxoglutarate as one donor, and incorporation of one atom each of oxygen into both donors (GO:0016706);; Molecular Function: L-ascorbic acid binding (GO:0031418);; Biological Process: oxidation-reduction process (GO:0055114…	--	--	[O]	Posttranslational modification, protein turnover, chaperones	2OG-Fe(II) oxygenase superfamily	Uncharacterized PKHD-type hydroxylase At1g22950 GN=At1g22950 OS=Arabidopsis thaliana (Mouse-ear cress) PE=2 SV=2	O	Posttranslational modification, protein turnover, chaperones	Os01g0502400 [Oryza sativa Japonica Group]
PB.297.1	LOC_Os01g31800.1	[B]	Chromatin structure and dynamics	Cellular Component: nucleosome (GO:0000786);; Molecular Function: DNA binding (GO:0003677);; Cellular Component: nucleus (GO:0005634);; Biological Process: nucleosome assembly (GO:0006334);; Molecular Function: protein heterodimerization activity (GO:0046982);;	K11251|1.49673e-49|gmx:100783903|histone H2A-like; K11251 histone H2A (A)	--	[B]	Chromatin structure and dynamics	Core histone H2A/H2B/H3/H4;; Histone-like transcription factor (CBF/NF-Y) and archaeal histone	Probable histone H2A.5 OS=Oryza sativa subsp. japonica (Rice) PE=2 SV=1	B	Chromatin structure and dynamics	PREDICTED: histone H2A-like [Glycine max]
PB.298.1	LOC_Os01g32080.1	[EH]	--	Molecular Function: magnesium ion binding (GO:0000287);; Molecular Function: pyruvate decarboxylase activity (GO:0004737);; Cellular Component: cytosol (GO:0005829);; Biological Process: toxin catabolic process (GO:0009407);; Biological Process: response to cyclopentenone (GO:0010583);; Molecular Function: transferase activity (GO:0016740);; Molecular Function: thiamine pyrophosphate binding (GO:…	K12261|0|sbi:SORBI_03g004100|SORBIDRAFT_03g004100, Sb03g004100; hypothetical protein; K12261 2-hydroxyacyl-CoA lyase 1 [EC:4.1.-.-] (A)	ko04146:Peroxisome	[EH]	--	Thiamine pyrophosphate enzyme, N-terminal TPP binding domain;; Thiamine pyrophosphate enzyme, central domain;; Thiamine pyrophosphate enzyme, C-terminal TPP binding domain	2-hydroxyacyl-CoA lyase OS=Oryza sativa subsp. japonica (Rice) PE=3 SV=3	E	Amino acid transport and metabolism	RecName: Full=2-hydroxyacyl-CoA lyase; AltName: Full=2-hydroxyphytanoyl-CoA lyase; Short=2-HPCL; AltName: Full=Oxalyl-CoA decarboxylase [Oryza sativa Japonica Group]
PB.299.1	PB.299.1	--	--	--	--	--	[R]	General function prediction only	--	Pentatricopeptide repeat-containing protein At1g71060, mitochondrial (Precursor) GN=At1g71060 OS=Arabidopsis thaliana (Mouse-ear cress) PE=2 SV=1	S	Function unknown	Os01g0505500 [Oryza sativa Japonica Group]
PB.300.1	LOC_Os01g32120.1	[TZDR]	--	Cellular Component: plant-type vacuole (GO:0000325);; Molecular Function: calcium ion binding (GO:0005509);; Biological Process: regulation of ion transport (GO:0043269);;	K13448|1.10831e-108|osa:4324037|Os01g0505600; K13448 calcium-binding protein CML (A)	ko04626:Plant-pathogen interaction	[T]	Signal transduction mechanisms	EF-hand domain pair;; EF hand;; EF-hand domain pair;; EF-hand domain;; EF hand;; Secreted protein acidic and rich in cysteine Ca binding region;; Cytoskeletal-regulatory complex EF hand	Probable calcium-binding protein CML11 OS=Oryza sativa subsp. japonica (Rice) PE=2 SV=1	DTZ	--	Os01g0505600 [Oryza sativa Japonica Group]
PB.301.1	PB.301.1	--	--	Cellular Component: plastid (GO:0009536);;	--	--	--	--	--	--	--	--	unknown [Oryza sativa Indica Group]
PB.302.1	LOC_Os01g32300.2	--	--	Biological Process: regulation of transcription, DNA-templated (GO:0006355);; Cellular Component: ELL-EAF complex (GO:0032783);;	K15186|0|osa:4324047|Os01g0507500; K15186 ELL-associated factor (A)	--	[K]	Transcription	RNA polymerase II transcription elongation factor	--	K	Transcription	Os01g0507500 [Oryza sativa Japonica Group]
PB.303.1	LOC_Os01g32330.1	--	--	Biological Process: metal ion transport (GO:0030001);; Molecular Function: metal ion binding (GO:0046872);;	--	--	[P]	Inorganic ion transport and metabolism	Heavy-metal-associated domain	Heavy metal-associated isoprenylated plant protein 26 (Precursor) GN=F20M13.140 OS=Arabidopsis thaliana (Mouse-ear cress) PE=1 SV=1	S	Function unknown	Os01g0507700 [Oryza sativa Japonica Group]
PB.304.1	LOC_Os01g32350.2	[OU]	--	Molecular Function: serine-type endopeptidase activity (GO:0004252);; Biological Process: proteolysis (GO:0006508);; Cellular Component: chloroplast thylakoid (GO:0009534);; Cellular Component: chloroplastic endopeptidase Clp complex (GO:0009840);; Cellular Component: chloroplast envelope (GO:0009941);;	K01358|6.9212e-168|osa:4324049|Os01g0507900; K01358 ATP-dependent Clp protease, protease subunit [EC:3.4.21.92] (A)	--	[O]	Posttranslational modification, protein turnover, chaperones	Clp protease	ATP-dependent Clp protease proteolytic subunit 3, chloroplastic (Precursor) OS=Arabidopsis thaliana (Mouse-ear cress) PE=1 SV=1	O	Posttranslational modification, protein turnover, chaperones	putative ATP-dependent Clp protease, proteolytic subunit [Oryza sativa Japonica Group]
PB.304.2	LOC_Os01g32350.2	[OU]	--	Molecular Function: serine-type endopeptidase activity (GO:0004252);; Biological Process: proteolysis (GO:0006508);; Cellular Component: chloroplast thylakoid (GO:0009534);; Cellular Component: chloroplastic endopeptidase Clp complex (GO:0009840);; Cellular Component: chloroplast envelope (GO:0009941);;	K01358|6.9212e-168|osa:4324049|Os01g0507900; K01358 ATP-dependent Clp protease, protease subunit [EC:3.4.21.92] (A)	--	[O]	Posttranslational modification, protein turnover, chaperones	Clp protease	ATP-dependent Clp protease proteolytic subunit 3, chloroplastic (Precursor) OS=Arabidopsis thaliana (Mouse-ear cress) PE=1 SV=1	O	Posttranslational modification, protein turnover, chaperones	putative ATP-dependent Clp protease, proteolytic subunit [Oryza sativa Japonica Group]
PB.305.1	LOC_Os01g32364.1	[G]	Carbohydrate transport and metabolism	Biological Process: carbohydrate metabolic process (GO:0005975);; Cellular Component: plant-type cell wall (GO:0009505);; Cellular Component: cytoplasmic membrane-bounded vesicle (GO:0016023);; Cellular Component: cytosolic ribosome (GO:0022626);; Molecular Function: amygdalin beta-glucosidase activity (GO:0047668);; Molecular Function: cellobiose glucosidase activity (GO:0080079);; Molecular Fun…	K05350|0|osa:4324050|Os01g0508000; K05350 beta-glucosidase [EC:3.2.1.21] (A)	ko00460:Cyanoamino acid metabolism;ko00500:Starch and sucrose metabolism;ko00940:Phenylpropanoid biosynthesis	[G]	Carbohydrate transport and metabolism	Glycosyl hydrolase family 1	Beta-glucosidase 1 (Precursor) GN=OSJNBa0094H06.33 OS=Oryza sativa subsp. japonica (Rice) PE=2 SV=1	G	Carbohydrate transport and metabolism	Os01g0508000 [Oryza sativa Japonica Group]
PB.306.1	LOC_Os01g32380.1	--	--	Cellular Component: plastid (GO:0009536);;	--	--	--	--	--	--	--	--	Os01g0508100 [Oryza sativa Japonica Group]
PB.307.1	PB.307.1	--	--	Cellular Component: mitochondrion (GO:0005739);; Cellular Component: cytoplasmic membrane-bounded vesicle (GO:0016023);;	--	--	--	--	--	--	--	--	Os01g0508300 [Oryza sativa Japonica Group]
PB.308.1	LOC_Os01g32460.1	--	--	--	--	--	--	--	--	--	--	--	Os01g0508500 [Oryza sativa Japonica Group]
PB.309.1	PB.309.1	--	--	--	--	--	--	--	--	--	S	Function unknown	Os01g0509900 [Oryza sativa Japonica Group]
PB.310.1	LOC_Os01g32660.1	[RTKL]	--	Biological Process: activation of MAPK activity (GO:0000187);; Molecular Function: protein serine/threonine kinase activity (GO:0004674);; Molecular Function: MAP kinase kinase activity (GO:0004708);; Molecular Function: ATP binding (GO:0005524);; Biological Process: regulation of DNA replication (GO:0006275);; Biological Process: regulation of G2/M transition of mitotic cell cycle (GO:0010389);;…	K04368|0|osa:4324023|Os01g0510100; K04368 mitogen-activated protein kinase kinase 1 [EC:2.7.12.2] (A)	ko04626:Plant-pathogen interaction	[T]	Signal transduction mechanisms	Protein kinase domain;; Protein tyrosine kinase;; Kinase-like	Mitogen-activated protein kinase kinase 1 OS=Oryza sativa subsp. japonica (Rice) PE=1 SV=1	T	Signal transduction mechanisms	Os01g0510100 [Oryza sativa Japonica Group]
PB.311.1	LOC_Os01g32870.1	[O]	Posttranslational modification, protein turnover, chaperones	Biological Process: protein folding (GO:0006457);; Molecular Function: cytoskeletal protein binding (GO:0008092);; Biological Process: positive gravitropism (GO:0009958);; Molecular Function: heat shock protein binding (GO:0031072);; Molecular Function: unfolded protein binding (GO:0051082);;	--	--	[O]	Posttranslational modification, protein turnover, chaperones	DnaJ domain	Chaperone protein dnaJ 15 GN=T2E12.8 OS=Arabidopsis thaliana (Mouse-ear cress) PE=1 SV=1	O	Posttranslational modification, protein turnover, chaperones	Os01g0512100 [Oryza sativa Japonica Group]
PB.311.2	LOC_Os01g32870.2	[O]	Posttranslational modification, protein turnover, chaperones	Biological Process: protein folding (GO:0006457);; Molecular Function: cytoskeletal protein binding (GO:0008092);; Biological Process: positive gravitropism (GO:0009958);; Molecular Function: heat shock protein binding (GO:0031072);; Molecular Function: unfolded protein binding (GO:0051082);;	--	--	[O]	Posttranslational modification, protein turnover, chaperones	DnaJ domain	Chaperone protein dnaJ 15 GN=T2E12.8 OS=Arabidopsis thaliana (Mouse-ear cress) PE=1 SV=1	O	Posttranslational modification, protein turnover, chaperones	Os01g0512100 [Oryza sativa Japonica Group]
PB.312.1	LOC_Os01g33000.1	--	--	--	--	--	--	--	Protein of unknown function (DUF789)	--	S	Function unknown	Os01g0513400 [Oryza sativa Japonica Group]
PB.313.1	LOC_Os01g33040.1	--	--	Biological Process: cytokinesis by cell plate formation (GO:0000911);; Molecular Function: microtubule motor activity (GO:0003777);; Molecular Function: ATP binding (GO:0005524);; Cellular Component: kinesin complex (GO:0005871);; Cellular Component: microtubule (GO:0005874);; Biological Process: microtubule-based movement (GO:0007018);; Biological Process: male meiosis cytokinesis (GO:0007112);;…	K11498|0|osa:4323990|Os01g0513900; K11498 centromeric protein E (A)	--	[Z]	Cytoskeleton	Kinesin motor domain;; Domain of unknown function (DUF3490)	Kinesin-like protein NACK1 GN=NACK1 OS=Nicotiana tabacum (Common tobacco) PE=1 SV=1	Z	Cytoskeleton	Os01g0513900 [Oryza sativa Japonica Group]
PB.314.1	LOC_Os01g33060.1	--	--	--	--	--	[T]	Signal transduction mechanisms	HEAT repeat	--	S	Function unknown	Os01g0514300 [Oryza sativa Japonica Group]
PB.315.1	LOC_Os01g33090.1	[RTKL]	--	Molecular Function: protein tyrosine kinase activity (GO:0004713);; Molecular Function: ATP binding (GO:0005524);; Cellular Component: plasma membrane (GO:0005886);; Biological Process: protein phosphorylation (GO:0006468);; Cellular Component: plant-type cell wall (GO:0009505);; Cellular Component: chloroplast stroma (GO:0009570);; Cellular Component: integral component of membrane (GO:0016021);…	--	--	--	--	Protein kinase domain;; Protein tyrosine kinase;; Leucine Rich Repeat;; Leucine rich repeat;; Leucine rich repeat N-terminal domain;; Leucine Rich repeats (2 copies);; Leucine Rich repeat;; Leucine rich repeat	Probable inactive leucine-rich repeat receptor-like protein kinase At1g66830 (Precursor) GN=At1g66830 OS=Arabidopsis thaliana (Mouse-ear cress) PE=2 SV=1	T	Signal transduction mechanisms	Os01g0514700 [Oryza sativa Japonica Group]
PB.316.1	LOC_Os01g33204.1	--	--	Molecular Function: RNA binding (GO:0003723);; Molecular Function: RNA-directed DNA polymerase activity (GO:0003964);; Biological Process: RNA-dependent DNA replication (GO:0006278);; Cellular Component: plastid (GO:0009536);;	--	--	--	--	--	--	--	--	unnamed protein product [Oryza sativa Japonica Group]
PB.317.1	PB.317.1	--	--	--	--	--	--	--	--	--	--	--	Os01g0519400 [Oryza sativa Japonica Group]
PB.318.1	PB.318.1	[R]	General function prediction only	Biological Process: lipid metabolic process (GO:0006629);;	--	--	[I]	Lipid transport and metabolism	Partial alpha/beta-hydrolase lipase region;; Alpha/beta hydrolase family;; Alpha/beta hydrolase family	Triacylglycerol lipase 2 (Precursor) GN=LIP2 OS=Arabidopsis thaliana (Mouse-ear cress) PE=2 SV=1	S	Function unknown	hypothetical protein OsJ_02027 [Oryza sativa Japonica Group]
PB.319.1	PB.319.1	[O]	Posttranslational modification, protein turnover, chaperones	Biological Process: protein folding (GO:0006457);; Biological Process: defense response (GO:0006952);; Biological Process: regulation of mitotic cell cycle (GO:0007346);; Cellular Component: plastid (GO:0009536);; Biological Process: vernalization response (GO:0010048);; Molecular Function: heat shock protein binding (GO:0031072);; Molecular Function: ADP binding (GO:0043531);;	--	--	[O]	Posttranslational modification, protein turnover, chaperones	Protein of unknown function (DUF3752);; DnaJ domain	Chaperone protein dnaJ 49 OS=Arabidopsis thaliana (Mouse-ear cress) PE=2 SV=2	O	Posttranslational modification, protein turnover, chaperones	Os01g0521500 [Oryza sativa Japonica Group]
PB.320.1	PB.320.1	--	--	--	--	--	--	--	--	--	S	Function unknown	hypothetical protein OsJ_02040 [Oryza sativa Japonica Group]
PB.321.1	PB.321.1	--	--	--	--	--	--	--	--	--	S	Function unknown	PREDICTED: uncharacterized protein LOC101775702 [Setaria italica]
PB.322.1	PB.322.1	--	--	Cellular Component: mitochondrion (GO:0005739);; Biological Process: shoot system development (GO:0048367);;	--	--	--	--	--	--	--	--	PREDICTED: uncharacterized protein LOC100834191 [Brachypodium distachyon]
PB.323.1	LOC_Os01g34190.1	[R]	General function prediction only	Molecular Function: nucleotide binding (GO:0000166);; Biological Process: double-strand break repair via homologous recombination (GO:0000724);; Molecular Function: nucleic acid binding (GO:0003676);; Cellular Component: nucleus (GO:0005634);; Biological Process: mitotic recombination (GO:0006312);; Cellular Component: chloroplast (GO:0009507);; Biological Process: embryo sac egg cell differentia…	K12840|7.32055e-150|dosa:Os01t0526100-01|Os01g0526100; Similar to splicing factor 45.; K12840 splicing factor 45 (A)	ko03040:Spliceosome	[A]	RNA processing and modification	G-patch domain	DNA-damage-repair/toleration protein DRT111, chloroplastic (Precursor) GN=DRT111 OS=Arabidopsis thaliana (Mouse-ear cress) PE=1 SV=2	S	Function unknown	hypothetical protein OsI_02243 [Oryza sativa Indica Group]
PB.325.1	PB.325.1	[MG]	--	Molecular Function: catalytic activity (GO:0003824);; Cellular Component: plasma membrane (GO:0005886);; Biological Process: cellular metabolic process (GO:0044237);; Molecular Function: coenzyme binding (GO:0050662);;	--	--	[V]	Defense mechanisms	NAD dependent epimerase/dehydratase family;; 3-beta hydroxysteroid dehydrogenase/isomerase family;; NADH(P)-binding;; Male sterility protein;; NmrA-like family	Tetraketide alpha-pyrone reductase 1 GN=F23E12.20 OS=Arabidopsis thaliana (Mouse-ear cress) PE=2 SV=1	M	Cell wall/membrane/envelope biogenesis	Os01g0528800 [Oryza sativa Japonica Group]
PB.325.2	LOC_Os01g34480.1	[MG]	--	Molecular Function: catalytic activity (GO:0003824);; Cellular Component: plasma membrane (GO:0005886);; Biological Process: cellular metabolic process (GO:0044237);; Molecular Function: coenzyme binding (GO:0050662);;	--	--	[V]	Defense mechanisms	NAD dependent epimerase/dehydratase family;; 3-beta hydroxysteroid dehydrogenase/isomerase family;; NADH(P)-binding;; Male sterility protein;; NmrA-like family	Cinnamoyl-CoA reductase 1 GN=T24D18.5 OS=Arabidopsis thaliana (Mouse-ear cress) PE=1 SV=1	M	Cell wall/membrane/envelope biogenesis	Os01g0528800 [Oryza sativa Japonica Group]
PB.326.1	LOC_Os01g34560.1	--	--	Cellular Component: mitochondrion (GO:0005739);; Biological Process: fatty acid biosynthetic process (GO:0006633);; Cellular Component: membrane (GO:0016020);; Cellular Component: cytoplasmic membrane-bounded vesicle (GO:0016023);; Molecular Function: transferase activity, transferring acyl groups other than amino-acyl groups (GO:0016747);;	K15397|0|dosa:Os01t0529800-01|Os01g0529800; Similar to Very-long-chain fatty acid condensing enzyme CUT1.; K15397 3-ketoacyl-CoA synthase [EC:2.3.1.199] (A)	ko00062:Fatty acid elongation	--	--	FAE1/Type III polyketide synthase-like protein;; 3-Oxoacyl-[acyl-carrier-protein (ACP)] synthase III C terminal;; Chalcone and stilbene synthases, C-terminal domain;; Chalcone and stilbene synthases, N-terminal domain	3-ketoacyl-CoA synthase 6 GN=T26J14.10 OS=Arabidopsis thaliana (Mouse-ear cress) PE=1 SV=1	Q	Secondary metabolites biosynthesis, transport and catabolism	Os01g0529800 [Oryza sativa Japonica Group]
PB.327.1	LOC_Os01g34610.1	--	--	--	--	--	--	--	SANTA (SANT Associated)	--	S	Function unknown	hypothetical protein OsI_02266 [Oryza sativa Indica Group]
PB.328.1	LOC_Os01g34614.1	[K]	Transcription	Biological Process: RNA splicing, via endonucleolytic cleavage and ligation (GO:0000394);; Cellular Component: DNA-directed RNA polymerase IV complex (GO:0000418);; Cellular Component: DNA-directed RNA polymerase V complex (GO:0000419);; Molecular Function: DNA binding (GO:0003677);; Molecular Function: DNA-directed RNA polymerase activity (GO:0003899);; Cellular Component: DNA-directed RNA polym…	K03009|5.15518e-31|zma:100285004|pco092707; LOC100285004; K03009 DNA-directed RNA polymerases I, II, and III subunit RPABC4 (A)	ko00230:Purine metabolism;ko00240:Pyrimidine metabolism;ko03020:RNA polymerase	[K]	Transcription	DNA directed RNA polymerase, 7 kDa subunit	DNA-directed RNA polymerases II, IV and V subunit 12 GN=MEE6.8 OS=Arabidopsis thaliana (Mouse-ear cress) PE=1 SV=1	K	Transcription	TPA: DNA-directed RNA polymerase I, II, and III polypeptide isoform 1, partial [Zea mays]
PB.329.1	LOC_Os01g34620.8	[O]	Posttranslational modification, protein turnover, chaperones	Cellular Component: mitochondrion (GO:0005739);; Molecular Function: electron carrier activity (GO:0009055);; Molecular Function: protein disulfide oxidoreductase activity (GO:0015035);; Biological Process: cell redox homeostasis (GO:0045454);; Molecular Function: metal ion binding (GO:0046872);; Biological Process: anther development (GO:0048653);; Molecular Function: 2 iron, 2 sulfur cluster bi…	--	--	[O]	Posttranslational modification, protein turnover, chaperones	Glutaredoxin	Monothiol glutaredoxin-S4, mitochondrial (Precursor) GN=P0702H08.16-1 OS=Oryza sativa subsp. japonica (Rice) PE=2 SV=1	O	Posttranslational modification, protein turnover, chaperones	Glutaredoxin-like protein [Oryza sativa Japonica Group]
PB.330.1	LOC_Os01g34700.1	[Q]	Secondary metabolites biosynthesis, transport and catabolism	Cellular Component: mitochondrion (GO:0005739);; Cellular Component: cytosol (GO:0005829);; Biological Process: metabolic process (GO:0008152);; Cellular Component: chloroplast (GO:0009507);; Biological Process: response to zinc ion (GO:0010043);; Molecular Function: transferase activity, transferring acyl groups other than amino-acyl groups (GO:0016747);; Molecular Function: hydrolase activity (…	K01061|0|osa:4327800|Os01g0531500; K01061 carboxymethylenebutenolidase [EC:3.1.1.45] (A)	--	[R]	General function prediction only	Dienelactone hydrolase family;; Alpha/beta hydrolase family;; Alpha/beta hydrolase family;; Phospholipase/Carboxylesterase;; alpha/beta hydrolase fold;; Uncharacterized conserved protein (DUF2048)	--	Q	Secondary metabolites biosynthesis, transport and catabolism	Os01g0531500 [Oryza sativa Japonica Group]
PB.331.1	LOC_Os01g34870.1	[BD]	--	Biological Process: microtubule cytoskeleton organization (GO:0000226);; Cellular Component: condensed chromosome (GO:0000793);; Biological Process: cytokinesis by cell plate formation (GO:0000911);; Cellular Component: cytoplasm (GO:0005737);; Biological Process: DNA replication initiation (GO:0006270);; Biological Process: regulation of DNA replication (GO:0006275);; Biological Process: DNA met…	K06676|0|obr:102713508|condensin complex subunit 2-like; K06676 condensin complex subunit 2 (A)	--	[BD]	--	Condensin complex subunit 2	Condensin complex subunit 2 GN=T26B15 OS=Arabidopsis thaliana (Mouse-ear cress) PE=1 SV=1	BD	--	hypothetical protein OsJ_02085 [Oryza sativa Japonica Group]
PB.332.1	LOC_Os01g35040.1	[O]	Posttranslational modification, protein turnover, chaperones	Cellular Component: intracellular (GO:0005622);; Biological Process: ubiquitin-dependent protein catabolic process (GO:0006511);; Molecular Function: zinc ion binding (GO:0008270);;	--	--	[O]	Posttranslational modification, protein turnover, chaperones	Ubiquitin fusion degradation protein UFD1	--	O	Posttranslational modification, protein turnover, chaperones	Os01g0534800 [Oryza sativa Japonica Group]
PB.333.1	LOC_Os01g35580.1	--	--	--	--	--	--	--	--	--	S	Function unknown	unknown protein [Oryza sativa Japonica Group]
PB.334.1	PB.334.1	--	--	Cellular Component: plastid (GO:0009536);;	--	--	--	--	--	--	--	--	hypothetical protein OsJ_02141 [Oryza sativa Japonica Group]
PB.335.1	LOC_Os01g36240.1	--	--	Molecular Function: peroxidase activity (GO:0004601);; Cellular Component: cell wall (GO:0005618);; Biological Process: response to oxidative stress (GO:0006979);; Cellular Component: cytoplasmic membrane-bounded vesicle (GO:0016023);; Molecular Function: heme binding (GO:0020037);; Molecular Function: metal ion binding (GO:0046872);; Biological Process: response to other organism (GO:0051707);; …	K00430|0|osa:4326874|Os01g0543100; K00430 peroxidase [EC:1.11.1.7] (A)	ko00360:Phenylalanine metabolism;ko00940:Phenylpropanoid biosynthesis	--	--	Peroxidase	Peroxidase 72 (Precursor) OS=Arabidopsis thaliana (Mouse-ear cress) PE=1 SV=1	G	Carbohydrate transport and metabolism	Os01g0543100 [Oryza sativa Japonica Group]
PB.336.1	LOC_Os01g36390.1	[L]	Replication, recombination and repair	Biological Process: nuclear division (GO:0000280);; Biological Process: cytokinesis by cell plate formation (GO:0000911);; Molecular Function: DNA binding (GO:0003677);; Molecular Function: DNA helicase activity (GO:0003678);; Molecular Function: ATP binding (GO:0005524);; Cellular Component: cytosol (GO:0005829);; Biological Process: DNA unwinding involved in DNA replication (GO:0006268);; Biolo…	K02212|0|dosa:Os01t0544450-01|Os01g0544450, MINI-CHROMOSOME_MAINTENANCE_PROTEIN_4, MCM4; Similar to DNA replication licensing factor mcm4.; K02212 DNA replication licensing factor MCM4 [EC:3.6.4.12] (A)	ko03030:DNA replication	[L]	Replication, recombination and repair	MCM2/3/5 family;; MCM N-terminal domain;; Magnesium chelatase, subunit ChlI;; AAA domain (dynein-related subfamily);; Sigma-54 interaction domain	DNA replication licensing factor MCM4 GN=OSJNBa0051H17.26 OS=Oryza sativa subsp. japonica (Rice) PE=3 SV=2	L	Replication, recombination and repair	hypothetical protein OsJ_02146 [Oryza sativa Japonica Group]
PB.337.1	PB.337.1	--	--	--	--	--	--	--	--	--	--	--	hypothetical protein OsJ_01655 [Oryza sativa Japonica Group]
PB.338.1	LOC_Os01g36860.3	[LKJ]	--	Biological Process: nuclear-transcribed mRNA catabolic process, nonsense-mediated decay (GO:0000184);; Molecular Function: RNA binding (GO:0003723);; Molecular Function: ATP-dependent RNA helicase activity (GO:0004004);; Molecular Function: ATP binding (GO:0005524);; Cellular Component: nucleus (GO:0005634);; Biological Process: ATP catabolic process (GO:0006200);; Biological Process: rRNA proces…	K12823|0|osa:4326190|Os01g0549400; K12823 ATP-dependent RNA helicase DDX5/DBP2 [EC:3.6.4.13] (A)	ko03040:Spliceosome	[A]	RNA processing and modification	DEAD/DEAH box helicase;; Helicase conserved C-terminal domain	DEAD-box ATP-dependent RNA helicase 40 OS=Oryza sativa subsp. japonica (Rice) PE=2 SV=2	L	Replication, recombination and repair	putative ATP-dependent RNA helicase DB10 [Oryza sativa Japonica Group]
PB.339.1	PB.339.1	[LKJ]	--	Molecular Function: RNA binding (GO:0003723);; Molecular Function: ATP binding (GO:0005524);; Cellular Component: nucleus (GO:0005634);; Biological Process: mRNA processing (GO:0006397);; Molecular Function: ATP-dependent helicase activity (GO:0008026);; Biological Process: RNA splicing (GO:0008380);; Biological Process: mRNA transport (GO:0051028);;	K12812|0|osa:4326192|Os01g0549700; K12812 ATP-dependent RNA helicase UAP56/SUB2 [EC:3.6.4.13] (A)	ko03013:RNA transport;ko03015:mRNA surveillance pathway;ko03040:Spliceosome	[A]	RNA processing and modification	DEAD/DEAH box helicase;; Helicase conserved C-terminal domain	DEAD-box ATP-dependent RNA helicase 15 OS=Oryza sativa subsp. japonica (Rice) PE=2 SV=1	L	Replication, recombination and repair	Os01g0549700 [Oryza sativa Japonica Group]
PB.340.1	LOC_Os01g37260.2	--	--	--	--	--	--	--	FBD	Putative F-box protein At3g58860 GN=At3g58860 OS=Arabidopsis thaliana (Mouse-ear cress) PE=3 SV=1	S	Function unknown	Os01g0553400 [Oryza sativa Japonica Group]
PB.341.1	LOC_Os01g37280.1	--	--	--	--	--	--	--	--	--	--	--	unnamed protein product [Oryza sativa Japonica Group]
PB.342.1	LOC_Os01g37560.1	[O]	Posttranslational modification, protein turnover, chaperones	Cellular Component: plasma membrane (GO:0005886);; Biological Process: protein folding (GO:0006457);; Molecular Function: heat shock protein binding (GO:0031072);; Molecular Function: unfolded protein binding (GO:0051082);;	K09518|0|osa:4324566|Os01g0556400; K09518 DnaJ homolog subfamily B member 12 (A)	ko04141:Protein processing in endoplasmic reticulum	[O]	Posttranslational modification, protein turnover, chaperones	DnaJ domain;; Domain of unknown function (DUF1977)	Chaperone protein dnaJ 49 OS=Arabidopsis thaliana (Mouse-ear cress) PE=2 SV=2	O	Posttranslational modification, protein turnover, chaperones	Os01g0556400 [Oryza sativa Japonica Group]
PB.343.1	LOC_Os01g37670.1	--	--	--	--	--	--	--	F-box-like;; F-box domain	--	--	--	Os01g0557400 [Oryza sativa Japonica Group]
PB.345.1	LOC_Os01g37790.1	--	--	--	--	--	--	--	PWWP domain	Uncharacterized protein At1g51745 GN=At1g51745 OS=Arabidopsis thaliana (Mouse-ear cress) PE=2 SV=2	S	Function unknown	Os01g0558500 [Oryza sativa Japonica Group]
PB.346.1	LOC_Os01g37825.2	[R]	General function prediction only	Molecular Function: metalloendopeptidase activity (GO:0004222);; Cellular Component: mitochondrion (GO:0005739);; Biological Process: proteolysis (GO:0006508);; Molecular Function: zinc ion binding (GO:0008270);; Cellular Component: chloroplast (GO:0009507);;	--	--	[O]	Posttranslational modification, protein turnover, chaperones	Peptidase M16 inactive domain	--	O	Posttranslational modification, protein turnover, chaperones	PREDICTED: uncharacterized protein LOC102701684 [Oryza brachyantha]
PB.347.1	LOC_Os01g37832.1	--	--	--	--	--	[O]	Posttranslational modification, protein turnover, chaperones	PITH domain	--	S	Function unknown	Os01g0559000 [Oryza sativa Japonica Group]
PB.348.1	PB.348.1	[J]	Translation, ribosomal structure and biogenesis	Molecular Function: nucleotide binding (GO:0000166);; Molecular Function: aminoacyl-tRNA ligase activity (GO:0004812);; Biological Process: tRNA aminoacylation for protein translation (GO:0006418);;	K01875|9.07806e-125|osa:4324679|Os01g0559100; K01875 seryl-tRNA synthetase [EC:6.1.1.11] (A)	ko00970:Aminoacyl-tRNA biosynthesis	[J]	Translation, ribosomal structure and biogenesis	Seryl-tRNA synthetase N-terminal domain;; tRNA synthetase class II core domain (G, H, P, S and T)	Serine--tRNA ligase GN=At5g27470 OS=Arabidopsis thaliana (Mouse-ear cress) PE=2 SV=1	J	Translation, ribosomal structure and biogenesis	Os01g0559100 [Oryza sativa Japonica Group]
PB.349.1	LOC_Os01g37910.1	--	--	Cellular Component: lytic vacuole (GO:0000323);; Molecular Function: cysteine-type endopeptidase activity (GO:0004197);; Cellular Component: mitochondrion (GO:0005739);; Biological Process: proteolysis (GO:0006508);; Cellular Component: cytoplasmic membrane-bounded vesicle (GO:0016023);;	K01369|0|osa:4324683|Os01g0559600; K01369 legumain [EC:3.4.22.34] (A)	--	[O]	Posttranslational modification, protein turnover, chaperones	Peptidase C13 family	Vacuolar-processing enzyme (Precursor) OS=Phaseolus vulgaris (Kidney bean) PE=1 SV=1	O	Posttranslational modification, protein turnover, chaperones	hypothetical protein OsJ_02232 [Oryza sativa Japonica Group]
PB.352.1	LOC_Os01g37980.1	--	--	Cellular Component: plasma membrane (GO:0005886);; Biological Process: protein targeting to vacuole (GO:0006623);; Biological Process: membrane fusion (GO:0006944);; Biological Process: vesicle-mediated transport (GO:0016192);;	K08493|1.52545e-144|osa:4324687|Os01g0560200; K08493 vesicle transport through interaction with t-SNAREs 1 (A)	ko04130:SNARE interactions in vesicular transport	[U]	Intracellular trafficking, secretion, and vesicular transport	Vesicle transport v-SNARE protein N-terminus;; Snare region anchored in the vesicle membrane C-terminus	Vesicle transport v-SNARE 13 GN=VTI13 OS=Arabidopsis thaliana (Mouse-ear cress) PE=2 SV=1	U	Intracellular trafficking, secretion, and vesicular transport	Os01g0560200 [Oryza sativa Japonica Group]
PB.353.1	LOC_Os01g38229.2	[O]	Posttranslational modification, protein turnover, chaperones	Biological Process: protein peptidyl-prolyl isomerization (GO:0000413);; Molecular Function: peptidyl-prolyl cis-trans isomerase activity (GO:0003755);; Molecular Function: FK506 binding (GO:0005528);; Cellular Component: mitochondrion (GO:0005739);; Biological Process: protein folding (GO:0006457);; Cellular Component: membrane (GO:0016020);; Cellular Component: cytoplasmic membrane-bounded vesi…	--	--	[O]	Posttranslational modification, protein turnover, chaperones	FKBP-type peptidyl-prolyl cis-trans isomerase	70 kDa peptidyl-prolyl isomerase GN=FKBP70 OS=Triticum aestivum (Wheat) PE=1 SV=1	O	Posttranslational modification, protein turnover, chaperones	peptidylprolyl isomerase-like [Oryza sativa Japonica Group]
PB.354.1	PB.354.1	--	--	--	K09481|7.78586e-13|osa:4327929|Os01g0565900; K09481 protein transport protein SEC61 subunit beta (A)	ko03060:Protein export;ko04141:Protein processing in endoplasmic reticulum;ko04145:Phagosome	[O]	Posttranslational modification, protein turnover, chaperones	Sec61beta family;; Sec61beta family	Protein transport protein Sec61 subunit beta GN=At2g45070 OS=Arabidopsis thaliana (Mouse-ear cress) PE=1 SV=1	U	Intracellular trafficking, secretion, and vesicular transport	Os01g0565900 [Oryza sativa Japonica Group]
PB.355.1	LOC_Os01g38950.1	[RTKL]	--	Molecular Function: protein serine/threonine kinase activity (GO:0004674);; Molecular Function: ATP binding (GO:0005524);; Cellular Component: nucleus (GO:0005634);; Cellular Component: mitochondrion (GO:0005739);; Cellular Component: plasma membrane (GO:0005886);; Biological Process: protein phosphorylation (GO:0006468);; Cellular Component: plasmodesma (GO:0009506);;	K02218|0|osa:4326345|Os01g0570500; K02218 casein kinase 1 [EC:2.7.11.1] (A)	--	[T]	Signal transduction mechanisms	Protein kinase domain;; Protein tyrosine kinase	Casein kinase I isoform delta-like GN=At4g26100 OS=Arabidopsis thaliana (Mouse-ear cress) PE=2 SV=2	T	Signal transduction mechanisms	Os01g0570500 [Oryza sativa Japonica Group]
PB.356.1	LOC_Os01g38970.1	[EF]	--	Molecular Function: carbamoyl-phosphate synthase (glutamine-hydrolyzing) activity (GO:0004088);; Molecular Function: ATP binding (GO:0005524);; Cellular Component: carbamoyl-phosphate synthase complex (GO:0005951);; Biological Process: gluconeogenesis (GO:0006094);; Biological Process: chromatin silencing (GO:0006342);; Biological Process: arginine biosynthetic process (GO:0006526);; Biological P…	K01955|0|sbi:SORBI_03g025720|SORBIDRAFT_03g025720, Sb03g025720; hypothetical protein; K01955 carbamoyl-phosphate synthase large subunit [EC:6.3.5.5] (A)	ko00240:Pyrimidine metabolism;ko00250:Alanine, aspartate and glutamate metabolism	[R]	General function prediction only	Carbamoyl-phosphate synthase L chain, ATP binding domain;; ATP-grasp domain;; Carbamoyl-phosphate synthetase large chain, oligomerisation domain;; Carbamoyl-phosphate synthase L chain, N-terminal domain;; MGS-like domain;; D-ala D-ala ligase C-terminus;; ATP-grasp domain;; RimK-like ATP-grasp domain	Carbamoyl-phosphate synthase large chain, chloroplastic (Precursor) GN=OsJ_02282 OS=Oryza sativa subsp. japonica (Rice) PE=2 SV=1	F	Nucleotide transport and metabolism	RecName: Full=Carbamoyl-phosphate synthase large chain, chloroplastic; AltName: Full=Carbamoyl-phosphate synthetase ammonia chain; Flags: Precursor [Oryza sativa Japonica Group]
PB.357.1	LOC_Os01g38990.1	--	--	Cellular Component: mitochondrial inner membrane (GO:0005743);; Cellular Component: integral component of membrane (GO:0016021);; Biological Process: transmembrane transport (GO:0055085);;	K15084|0|obr:102713409|graves disease carrier protein homolog; K15084 solute carrier family 25 (mitochondrial carrier protein), member 16 (A)	--	[C]	Energy production and conversion	Mitochondrial carrier protein	Mitochondrial adenine nucleotide transporter ADNT1 OS=Arabidopsis thaliana (Mouse-ear cress) PE=2 SV=1	S	Function unknown	mitochondrial carrier protein-like [Oryza sativa Japonica Group]
PB.357.2	LOC_Os01g38990.1	--	--	Cellular Component: mitochondrial inner membrane (GO:0005743);; Cellular Component: integral component of membrane (GO:0016021);; Biological Process: transmembrane transport (GO:0055085);;	K15084|0|obr:102713409|graves disease carrier protein homolog; K15084 solute carrier family 25 (mitochondrial carrier protein), member 16 (A)	--	[C]	Energy production and conversion	Mitochondrial carrier protein	Mitochondrial adenine nucleotide transporter ADNT1 OS=Arabidopsis thaliana (Mouse-ear cress) PE=2 SV=1	S	Function unknown	mitochondrial carrier protein-like [Oryza sativa Japonica Group]
PB.358.1	LOC_Os01g39010.1	[J]	Translation, ribosomal structure and biogenesis	Molecular Function: structural constituent of ribosome (GO:0003735);; Cellular Component: ribosome (GO:0005840);; Biological Process: translation (GO:0006412);;	K02914|4.79257e-69|osa:4326350|Os01g0571200; K02914 large subunit ribosomal protein L34 (A)	ko03010:Ribosome	[J]	Translation, ribosomal structure and biogenesis	Ribosomal protein L34	--	J	Translation, ribosomal structure and biogenesis	Os01g0571200 [Oryza sativa Japonica Group]
PB.359.1	PB.359.1	--	--	Molecular Function: ATP-dependent peptidase activity (GO:0004176);; Molecular Function: metalloendopeptidase activity (GO:0004222);; Molecular Function: serine-type endopeptidase activity (GO:0004252);; Molecular Function: ATP binding (GO:0005524);; Cellular Component: mitochondrion (GO:0005739);; Biological Process: ATP catabolic process (GO:0006200);; Biological Process: proteolysis (GO:0006508…	K08955|0|osa:4326310|Os01g0574400; K08955 ATP-dependent metalloprotease [EC:3.4.24.-] (A)	--	[O]	Posttranslational modification, protein turnover, chaperones	Peptidase family M41;; ATPase family associated with various cellular activities (AAA);; AAA domain (dynein-related subfamily);; Holliday junction DNA helicase ruvB N-terminus	ATP-dependent zinc metalloprotease FTSH 4, mitochondrial (Precursor) OS=Oryza sativa subsp. japonica (Rice) PE=3 SV=1	O	Posttranslational modification, protein turnover, chaperones	Os01g0574400 [Oryza sativa Japonica Group]
PB.360.1	LOC_Os01g39260.1	--	--	Molecular Function: ATP-dependent peptidase activity (GO:0004176);; Molecular Function: metalloendopeptidase activity (GO:0004222);; Molecular Function: serine-type endopeptidase activity (GO:0004252);; Molecular Function: ATP binding (GO:0005524);; Cellular Component: mitochondrion (GO:0005739);; Biological Process: ATP catabolic process (GO:0006200);; Biological Process: proteolysis (GO:0006508…	K08955|0|osa:4326311|Os01g0574500; K08955 ATP-dependent metalloprotease [EC:3.4.24.-] (A)	--	[O]	Posttranslational modification, protein turnover, chaperones	Peptidase family M41;; ATPase family associated with various cellular activities (AAA);; AAA domain (dynein-related subfamily);; TIP49 C-terminus;; Holliday junction DNA helicase ruvB N-terminus	ATP-dependent zinc metalloprotease FTSH 5, mitochondrial (Precursor) OS=Oryza sativa subsp. japonica (Rice) PE=3 SV=1	O	Posttranslational modification, protein turnover, chaperones	Os01g0574500 [Oryza sativa Japonica Group]
PB.360.2	LOC_Os01g39260.1	--	--	Molecular Function: ATP-dependent peptidase activity (GO:0004176);; Molecular Function: metalloendopeptidase activity (GO:0004222);; Molecular Function: serine-type endopeptidase activity (GO:0004252);; Molecular Function: ATP binding (GO:0005524);; Cellular Component: mitochondrion (GO:0005739);; Biological Process: ATP catabolic process (GO:0006200);; Biological Process: proteolysis (GO:0006508…	K08955|0|osa:4326311|Os01g0574500; K08955 ATP-dependent metalloprotease [EC:3.4.24.-] (A)	--	[O]	Posttranslational modification, protein turnover, chaperones	Peptidase family M41;; ATPase family associated with various cellular activities (AAA);; AAA domain (dynein-related subfamily);; TIP49 C-terminus;; Holliday junction DNA helicase ruvB N-terminus	ATP-dependent zinc metalloprotease FTSH 5, mitochondrial (Precursor) OS=Oryza sativa subsp. japonica (Rice) PE=3 SV=1	O	Posttranslational modification, protein turnover, chaperones	Os01g0574500 [Oryza sativa Japonica Group]
PB.361.1	LOC_Os01g39310.1	--	--	Molecular Function: GTPase activity (GO:0003924);; Molecular Function: GTP binding (GO:0005525);; Cellular Component: endoplasmic reticulum membrane (GO:0005789);; Cellular Component: plasma membrane (GO:0005886);; Biological Process: GTP catabolic process (GO:0006184);; Biological Process: ER to Golgi vesicle-mediated transport (GO:0006888);; Biological Process: plant-type cell wall biogenesis (…	--	--	[R]	General function prediction only	Root hair defective 3 GTP-binding protein (RHD3);; Guanylate-binding protein, N-terminal domain;; 50S ribosome-binding GTPase	Protein ROOT HAIR DEFECTIVE 3 {ECO:0000255|HAMAP-Rule:MF_03109} GN=B1112D09.4 OS=Oryza sativa subsp. japonica (Rice) PE=2 SV=1	Z	Cytoskeleton	Os01g0575000 [Oryza sativa Japonica Group]
PB.363.1	PB.363.1	--	--	Cellular Component: plastid (GO:0009536);; Biological Process: microsporogenesis (GO:0009556);; Molecular Function: SUMO transferase activity (GO:0019789);;	--	--	--	--	--	--	--	--	SaM- [Oryza sativa Japonica Group]
PB.364.1	LOC_Os01g39770.2	--	--	Molecular Function: calcium ion binding (GO:0005509);; Cellular Component: cytoplasm (GO:0005737);; Cellular Component: membrane (GO:0016020);;	K06268|3.52337e-134|dosa:Os01t0579600-01|Os01g0579600, CALCINEURIN_B-LIKE_PROTEIN_9, CBL9; Similar to Calcineurin B-like protein 9.; K06268 serine/threonine-protein phosphatase 2B regulatory subunit (A)	--	[T]	Signal transduction mechanisms	EF-hand domain;; EF hand	Calcineurin B-like protein 9 GN=CBL9 OS=Oryza sativa subsp. japonica (Rice) PE=2 SV=2	DTZ	--	RecName: Full=Calcineurin B-like protein 9 [Oryza sativa Japonica Group]
PB.364.2	LOC_Os01g39770.1	[TZDR]	--	Biological Process: polysaccharide biosynthetic process (GO:0000271);; Molecular Function: calcium ion binding (GO:0005509);; Cellular Component: plasma membrane (GO:0005886);; Cellular Component: plant-type vacuole membrane (GO:0009705);; Biological Process: multidimensional cell growth (GO:0009825);; Biological Process: cell tip growth (GO:0009932);; Biological Process: regulation of hormone le…	K06268|3.51751e-163|obr:102716732|calcineurin B-like protein 9-like; K06268 serine/threonine-protein phosphatase 2B regulatory subunit (A)	--	[T]	Signal transduction mechanisms	EF hand;; EF-hand domain pair;; EF-hand domain;; EF hand;; EF-hand domain pair	Calcineurin B-like protein 9 GN=CBL9 OS=Oryza sativa subsp. japonica (Rice) PE=2 SV=2	DTZ	--	RecName: Full=Calcineurin B-like protein 9 [Oryza sativa Japonica Group]
PB.365.1	PB.365.1	--	--	Cellular Component: membrane (GO:0016020);; Molecular Function: transferase activity, transferring glycosyl groups (GO:0016757);;	K05286|0|osa:4324190|Os01g0580100; K05286 phosphatidylinositol glycan, class B [EC:2.4.1.-] (A)	ko00563:Glycosylphosphatidylinositol(GPI)-anchor biosynthesis	[MO]	--	Alg9-like mannosyltransferase family	Dol-P-Man:Man(7)GlcNAc(2)-PP-Dol alpha-1,6-mannosyltransferase GN=ALG12 OS=Arabidopsis thaliana (Mouse-ear cress) PE=1 SV=1	S	Function unknown	Os01g0580100 [Oryza sativa Japonica Group]
PB.366.1	LOC_Os01g39830.1	[G]	Carbohydrate transport and metabolism	Molecular Function: beta-galactosidase activity (GO:0004565);; Biological Process: carbohydrate metabolic process (GO:0005975);; Cellular Component: plant-type cell wall (GO:0009505);; Cellular Component: cytoplasmic membrane-bounded vesicle (GO:0016023);; Molecular Function: carbohydrate binding (GO:0030246);; Cellular Component: apoplast (GO:0048046);;	--	--	[G]	Carbohydrate transport and metabolism	Glycosyl hydrolases family 35;; Galactose binding lectin domain;; Beta-galactosidase	Beta-galactosidase 2 (Precursor) OS=Oryza sativa subsp. japonica (Rice) PE=2 SV=1	G	Carbohydrate transport and metabolism	Os01g0580200 [Oryza sativa Japonica Group]
PB.367.1	LOC_Os01g39960.1	--	--	Cellular Component: plastid (GO:0009536);; Biological Process: photosynthesis, light harvesting (GO:0009765);; Biological Process: stomatal complex morphogenesis (GO:0010103);; Biological Process: carotene biosynthetic process (GO:0016120);; Biological Process: xanthophyll biosynthetic process (GO:0016123);; Molecular Function: oxidoreductase activity, acting on paired donors, with incorporation …	K06444|0|osa:4324196|Os01g0581300; K06444 lycopene epsilon-cyclase [EC:5.5.1.18] (A)	ko00906:Carotenoid biosynthesis	--	--	Lycopene cyclase protein;; FAD dependent oxidoreductase;; Pyridine nucleotide-disulphide oxidoreductase	Lycopene epsilon cyclase, chloroplastic (Precursor) GN=LUT2 OS=Arabidopsis thaliana (Mouse-ear cress) PE=1 SV=2	I	Lipid transport and metabolism	Os01g0581300 [Oryza sativa Japonica Group]
PB.368.1	LOC_Os01g40070.1	--	--	Cellular Component: plasma membrane (GO:0005886);; Cellular Component: chloroplast (GO:0009507);;	--	--	[L]	Replication, recombination and repair	DDE superfamily endonuclease	--	S	Function unknown	unknown protein [Oryza sativa Japonica Group]
PB.370.1	LOC_Os01g40190.1	--	--	--	--	--	--	--	Cotton fibre expressed protein	--	S	Function unknown	hypothetical protein [Oryza sativa Japonica Group]
PB.371.1	LOC_Os01g40280.1	--	--	Cellular Component: membrane (GO:0016020);;	--	--	[S]	Function unknown	Protein of unknown function (DUF2838)	--	S	Function unknown	Os01g0585100 [Oryza sativa Japonica Group]
PB.372.1	PB.372.1	--	--	--	--	--	--	--	Protein of unknown function (DUF632);; Protein of unknown function (DUF630)	--	S	Function unknown	hypothetical protein OsJ_02382 [Oryza sativa Japonica Group]
PB.373.1	LOC_Os01g40340.2	--	--	Cellular Component: plasma membrane (GO:0005886);;	K15501|0|obr:102718402|serine/threonine-protein phosphatase 6 regulatory subunit 3-like; K15501 serine/threonine-protein phosphatase 6 regulatory subunit 3 (A)	--	[D]	Cell cycle control, cell division, chromosome partitioning	SIT4 phosphatase-associated protein	--	T	Signal transduction mechanisms	hypothetical protein OsJ_02383 [Oryza sativa Japonica Group]
PB.374.1	LOC_Os01g40610.1	--	--	--	--	--	[S]	Function unknown	Family of unknown function (DUF572)	--	S	Function unknown	Os01g0588700 [Oryza sativa Japonica Group]
PB.374.2	LOC_Os01g40610.1	--	--	--	--	--	[S]	Function unknown	Family of unknown function (DUF572)	--	S	Function unknown	Os01g0588700 [Oryza sativa Japonica Group]
PB.375.1	LOC_Os01g40620.1	[S]	Function unknown	Cellular Component: mitochondrion (GO:0005739);; Molecular Function: zinc ion binding (GO:0008270);; Biological Process: photosynthesis (GO:0015979);; Biological Process: cellular respiration (GO:0045333);;	K18164|0|osa:4324444|Os01g0588800; K18164 NADH dehydrogenase [ubiquinone] 1 alpha subcomplex assembly factor 7 (A)	--	[S]	Function unknown	Putative S-adenosyl-L-methionine-dependent methyltransferase	--	S	Function unknown	Os01g0588800 [Oryza sativa Japonica Group]
PB.376.1	LOC_Os01g40650.1	--	--	Cellular Component: mitochondrion (GO:0005739);;	--	--	--	--	--	--	S	Function unknown	Os01g0589100 [Oryza sativa Japonica Group]
PB.377.1	LOC_Os01g40700.1	--	--	Cellular Component: plasma membrane (GO:0005886);;	--	--	--	--	--	--	S	Function unknown	unnamed protein product [Oryza sativa Japonica Group]
PB.378.1	LOC_Os01g40710.1	--	--	Cellular Component: chloroplast thylakoid membrane (GO:0009535);; Biological Process: response to blue light (GO:0009637);; Biological Process: response to high light intensity (GO:0009644);; Biological Process: response to sucrose (GO:0009744);; Biological Process: response to red light (GO:0010114);; Biological Process: regulation of proton transport (GO:0010155);; Biological Process: response …	--	--	--	--	--	--	S	Function unknown	Os01g0589800 [Oryza sativa Japonica Group]
PB.379.1	LOC_Os01g40860.1	[C]	Energy production and conversion	Molecular Function: oxidoreductase activity, acting on the aldehyde or oxo group of donors, NAD or NADP as acceptor (GO:0016620);; Biological Process: oxidation-reduction process (GO:0055114);;	K12355|0|osa:4326375|Os01g0591000; K12355 coniferyl-aldehyde dehydrogenase [EC:1.2.1.68] (A)	ko00940:Phenylpropanoid biosynthesis	[C]	Energy production and conversion	Aldehyde dehydrogenase family	Aldehyde dehydrogenase family 2 member C4 GN=MOB24.3 OS=Arabidopsis thaliana (Mouse-ear cress) PE=1 SV=2	C	Energy production and conversion	Os01g0591000 [Oryza sativa Japonica Group]
PB.380.1	LOC_Os01g40870.1	[C]	Energy production and conversion	Biological Process: phenylpropanoid biosynthetic process (GO:0009699);; Molecular Function: coniferyl-aldehyde dehydrogenase activity (GO:0050269);; Biological Process: oxidation-reduction process (GO:0055114);;	K12355|0|osa:4326376|Os01g0591300; K12355 coniferyl-aldehyde dehydrogenase [EC:1.2.1.68] (A)	ko00940:Phenylpropanoid biosynthesis	[C]	Energy production and conversion	Aldehyde dehydrogenase family	Aldehyde dehydrogenase family 2 member C4 GN=MOB24.3 OS=Arabidopsis thaliana (Mouse-ear cress) PE=1 SV=2	C	Energy production and conversion	Os01g0591300 [Oryza sativa Japonica Group]
PB.381.1	LOC_Os01g41010.1	--	--	--	--	--	--	--	Protein of unknown function (DUF581)	--	S	Function unknown	Os01g0593200 [Oryza sativa Japonica Group]
PB.382.1	PB.382.1	--	--	Cellular Component: membrane (GO:0016020);; Cellular Component: cytoplasmic membrane-bounded vesicle (GO:0016023);;	--	--	[U]	Intracellular trafficking, secretion, and vesicular transport	Integral membrane protein S linking to the trans Golgi network	--	S	Function unknown	Os01g0593600 [Oryza sativa Japonica Group]
PB.382.2	PB.382.2	--	--	Cellular Component: membrane (GO:0016020);; Cellular Component: cytoplasmic membrane-bounded vesicle (GO:0016023);;	--	--	[U]	Intracellular trafficking, secretion, and vesicular transport	Integral membrane protein S linking to the trans Golgi network	--	S	Function unknown	Os01g0593600 [Oryza sativa Japonica Group]
PB.383.1	LOC_Os01g41190.1	--	--	--	--	--	--	--	CASC3/Barentsz eIF4AIII binding	--	S	Function unknown	unnamed protein product [Oryza sativa Japonica Group]
PB.384.1	LOC_Os01g41220.1	--	--	Biological Process: fatty acid beta-oxidation (GO:0006635);; Cellular Component: cytoplasmic membrane-bounded vesicle (GO:0016023);; Biological Process: protein import into peroxisome matrix (GO:0016558);;	--	--	--	--	Protein of unknown function, DUF538	--	S	Function unknown	Os01g0595400 [Oryza sativa Japonica Group]
PB.385.1	PB.385.1	--	--	Molecular Function: amine transmembrane transporter activity (GO:0005275);; Biological Process: amino acid transport (GO:0006865);; Cellular Component: integral component of membrane (GO:0016021);;	K15015|0|osa:4325959|Os01g0597600; K15015 solute carrier family 32 (vesicular inhibitory amino acid transporter) (A)	--	[E]	Amino acid transport and metabolism	Transmembrane amino acid transporter protein;; Tryptophan/tyrosine permease family	Lysine histidine transporter-like 3 GN=At1g61270 OS=Arabidopsis thaliana (Mouse-ear cress) PE=3 SV=2	E	Amino acid transport and metabolism	hypothetical protein OsI_02701 [Oryza sativa Indica Group]
PB.386.1	PB.386.1	[T]	Signal transduction mechanisms	Cellular Component: protein phosphatase type 2A complex (GO:0000159);; Biological Process: signal transduction (GO:0007165);; Molecular Function: protein phosphatase type 2A regulator activity (GO:0008601);;	K04354|0|dosa:Os01t0600200-01|Os01g0600200; Ser/Thr specific protein phosphatase 2A B regulatory subunit beta isoform.; K04354 serine/threonine-protein phosphatase 2A regulatory subunit B (A)	ko03015:mRNA surveillance pathway	[T]	Signal transduction mechanisms	WD domain, G-beta repeat	Serine/threonine protein phosphatase 2A 55 kDa regulatory subunit B beta isoform GN=OsI_006296 OS=Oryza sativa subsp. indica (Rice) PE=2 SV=2	T	Signal transduction mechanisms	hypothetical protein OsI_02712 [Oryza sativa Indica Group]
PB.387.1	LOC_Os01g41640.1	--	--	Biological Process: regulation of flower development (GO:0009909);; Biological Process: histone modification (GO:0016570);; Biological Process: floral organ formation (GO:0048449);;	--	--	--	--	--	--	S	Function unknown	unknown protein [Oryza sativa Japonica Group]
PB.388.1	LOC_Os01g41710.1	--	--	Cellular Component: mitochondrion (GO:0005739);; Cellular Component: photosystem I (GO:0009522);; Cellular Component: photosystem II (GO:0009523);; Cellular Component: chloroplast thylakoid membrane (GO:0009535);; Biological Process: response to blue light (GO:0009637);; Biological Process: photosynthesis, light harvesting (GO:0009765);; Cellular Component: chloroplast envelope (GO:0009941);; Bio…	K08912|2.60612e-176|osa:4324599|Os01g0600900; K08912 light-harvesting complex II chlorophyll a/b binding protein 1 (A)	ko00196:Photosynthesis - antenna proteins	--	--	Chlorophyll A-B binding protein	Chlorophyll a-b binding protein 2, chloroplastic (Precursor) GN=P0518F01.17-1 OS=Oryza sativa subsp. japonica (Rice) PE=2 SV=2	J	Translation, ribosomal structure and biogenesis	Os01g0600900 [Oryza sativa Japonica Group]
PB.389.1	PB.389.1	[RTKL]	--	Molecular Function: protein serine/threonine kinase activity (GO:0004674);; Molecular Function: ATP binding (GO:0005524);; Biological Process: protein phosphorylation (GO:0006468);;	--	--	[T]	Signal transduction mechanisms	Protein kinase domain;; Protein tyrosine kinase	Probable receptor-like protein kinase At2g42960 GN=At2g42960 OS=Arabidopsis thaliana (Mouse-ear cress) PE=3 SV=1	T	Signal transduction mechanisms	hypothetical protein OsI_02719 [Oryza sativa Indica Group]
PB.390.1	LOC_Os01g41870.1	[RTKL]	--	Molecular Function: protein tyrosine kinase activity (GO:0004713);; Molecular Function: ATP binding (GO:0005524);; Cellular Component: mitochondrion (GO:0005739);; Cellular Component: plasma membrane (GO:0005886);; Biological Process: protein phosphorylation (GO:0006468);;	--	--	[T]	Signal transduction mechanisms	Protein tyrosine kinase;; Protein kinase domain	Inactive protein kinase SELMODRAFT_444075 GN=SELMODRAFT_444075 OS=Selaginella moellendorffii (Spikemoss) PE=2 SV=1	T	Signal transduction mechanisms	hypothetical protein OsJ_02508 [Oryza sativa Japonica Group]
PB.391.1	LOC_Os01g41900.1	--	--	Molecular Function: DNA binding (GO:0003677);; Molecular Function: chromatin binding (GO:0003682);; Molecular Function: zinc ion binding (GO:0008270);;	--	--	--	--	Myb-like DNA-binding domain	Transcription factor DIVARICATA GN=DIVARICATA OS=Antirrhinum majus (Garden snapdragon) PE=2 SV=1	K	Transcription	Os01g0603300 [Oryza sativa Japonica Group]
PB.392.1	LOC_Os01g42030.1	[O]	Posttranslational modification, protein turnover, chaperones	Molecular Function: ATP binding (GO:0005524);; Cellular Component: mitochondrion (GO:0005739);; Cellular Component: plasma membrane (GO:0005886);; Molecular Function: nucleoside-triphosphatase activity (GO:0017111);;	--	--	[O]	Posttranslational modification, protein turnover, chaperones	Domain associated at C-terminal with AAA;; ATPase family associated with various cellular activities (AAA);; Protein of unknown function (DUF815)	ATP-dependent zinc metalloprotease FTSH 8, chloroplastic (Precursor) OS=Arabidopsis thaliana (Mouse-ear cress) PE=1 SV=1	O	Posttranslational modification, protein turnover, chaperones	hypothetical protein OsJ_02530 [Oryza sativa Japonica Group]
PB.393.1	LOC_Os01g42040.1	[O]	Posttranslational modification, protein turnover, chaperones	Molecular Function: ubiquitin-protein transferase activity (GO:0004842);; Biological Process: protein ubiquitination (GO:0016567);;	K13960|0|osa:4324209|Os01g0605300; K13960 ubiquitin-conjugating enzyme E2 T [EC:6.3.2.19] (A)	--	[O]	Posttranslational modification, protein turnover, chaperones	Ubiquitin-conjugating enzyme	Probable ubiquitin-conjugating enzyme E2 37 GN=UBC37 OS=Arabidopsis thaliana (Mouse-ear cress) PE=2 SV=2	O	Posttranslational modification, protein turnover, chaperones	Os01g0605300 [Oryza sativa Japonica Group]
PB.394.1	LOC_Os01g42080.1	--	--	Cellular Component: nucleus (GO:0005634);; Cellular Component: mitochondrion (GO:0005739);; Molecular Function: zinc ion binding (GO:0008270);;	--	--	[S]	Function unknown	C3HC zinc finger-like;; Rsm1-like	--	S	Function unknown	hypothetical protein [Oryza sativa Japonica Group]
PB.395.1	LOC_Os01g42234.1	[E]	Amino acid transport and metabolism	Biological Process: amino acid transmembrane transport (GO:0003333);; Molecular Function: L-glutamate transmembrane transporter activity (GO:0005313);; Cellular Component: mitochondrion (GO:0005739);; Molecular Function: L-alanine transmembrane transporter activity (GO:0015180);; Molecular Function: arginine transmembrane transporter activity (GO:0015181);; Molecular Function: gamma-aminobutyric …	--	--	[E]	Amino acid transport and metabolism	Amino acid permease;; Amino acid permease	Amino-acid permease BAT1 homolog GN=OsJ_02547 OS=Oryza sativa subsp. japonica (Rice) PE=2 SV=1	E	Amino acid transport and metabolism	Os01g0607200 [Oryza sativa Japonica Group]
PB.395.2	PB.395.2	[E]	Amino acid transport and metabolism	Biological Process: amino acid transmembrane transport (GO:0003333);; Molecular Function: L-glutamate transmembrane transporter activity (GO:0005313);; Cellular Component: mitochondrion (GO:0005739);; Molecular Function: L-alanine transmembrane transporter activity (GO:0015180);; Molecular Function: arginine transmembrane transporter activity (GO:0015181);; Molecular Function: gamma-aminobutyric …	--	--	[E]	Amino acid transport and metabolism	Amino acid permease;; Amino acid permease	Amino-acid permease BAT1 homolog GN=OsJ_02547 OS=Oryza sativa subsp. japonica (Rice) PE=2 SV=1	E	Amino acid transport and metabolism	Os01g0607200 [Oryza sativa Japonica Group]
PB.396.1	LOC_Os01g42430.1	[C]	Energy production and conversion	Cellular Component: vacuole (GO:0005773);; Molecular Function: hydrogen ion transmembrane transporter activity (GO:0015078);; Biological Process: ATP hydrolysis coupled proton transport (GO:0015991);; Cellular Component: integral component of membrane (GO:0016021);; Cellular Component: proton-transporting V-type ATPase, V0 domain (GO:0033179);;	K03661|6.01503e-108|osa:4327731|Os01g0610100; K03661 V-type H+-transporting ATPase 21kDa proteolipid subunit (A)	ko00190:Oxidative phosphorylation;ko04145:Phagosome	[C]	Energy production and conversion	ATP synthase subunit C	V-type proton ATPase subunit c&apos;&apos;2 GN=F3N11.6 OS=Arabidopsis thaliana (Mouse-ear cress) PE=1 SV=1	C	Energy production and conversion	Os01g0610100 [Oryza sativa Japonica Group]
PB.397.1	LOC_Os01g42460.1	--	--	Molecular Function: nucleotide binding (GO:0000166);; Molecular Function: DNA binding (GO:0003677);;	--	--	--	--	BAH domain	--	S	Function unknown	hypothetical protein OsJ_02569 [Oryza sativa Japonica Group]
PB.398.1	LOC_Os01g42520.1	--	--	Cellular Component: mitochondrion (GO:0005739);; Cellular Component: cytoplasmic membrane-bounded vesicle (GO:0016023);;	--	--	--	--	Protein of unknown function (DUF642)	--	S	Function unknown	Os01g0611000 [Oryza sativa Japonica Group]
PB.399.1	PB.399.1	[R]	General function prediction only	Molecular Function: GTPase activity (GO:0003924);; Molecular Function: protein binding (GO:0005515);; Molecular Function: GTP binding (GO:0005525);; Cellular Component: cell wall (GO:0005618);; Cellular Component: nucleolus (GO:0005730);; Cellular Component: Golgi apparatus (GO:0005794);; Cellular Component: cytosol (GO:0005829);; Cellular Component: plasma membrane (GO:0005886);; Biological Proc…	K07936|2.90187e-140|osa:4325312|Os01g0611100; K07936 GTP-binding nuclear protein Ran (A)	ko03008:Ribosome biogenesis in eukaryotes;ko03013:RNA transport	[U]	Intracellular trafficking, secretion, and vesicular transport	Ras family;; Miro-like protein;; ADP-ribosylation factor family;; RNA helicase	GTP-binding nuclear protein Ran-1 OS=Oryza sativa subsp. japonica (Rice) PE=2 SV=1	S	Function unknown	hypothetical protein OsJ_02575 [Oryza sativa Japonica Group]
PB.400.1	LOC_Os01g42650.1	--	--	Molecular Function: cytochrome-c oxidase activity (GO:0004129);; Cellular Component: mitochondrial respiratory chain complex IV (GO:0005751);; Biological Process: mitochondrial electron transport, cytochrome c to oxygen (GO:0006123);; Molecular Function: zinc ion binding (GO:0008270);; Biological Process: aerobic respiration (GO:0009060);; Cellular Component: chloroplast thylakoid membrane (GO:00…	K02265|1.94141e-68|osa:4325317|Os01g0612200; K02265 cytochrome c oxidase subunit 5b (A)	ko00190:Oxidative phosphorylation	[C]	Energy production and conversion	Cytochrome c oxidase subunit Vb;; Zinc-finger domain	Cytochrome c oxidase subunit 5b-2, mitochondrial (Precursor) GN=COX5B-2 OS=Arabidopsis thaliana (Mouse-ear cress) PE=2 SV=1	O	Posttranslational modification, protein turnover, chaperones	Os01g0612200 [Oryza sativa Japonica Group]
PB.401.1	LOC_Os01g42710.1	--	--	Molecular Function: sequence-specific DNA binding transcription factor activity (GO:0003700);; Cellular Component: nucleus (GO:0005634);; Biological Process: regulation of transcription, DNA-templated (GO:0006355);; Biological Process: positive regulation of defense response (GO:0031349);; Biological Process: positive regulation of growth (GO:0045927);;	--	--	--	--	LSD1 zinc finger	Protein LOL5 OS=Oryza sativa subsp. japonica (Rice) PE=2 SV=1	S	Function unknown	hypothetical protein OsJ_02587 [Oryza sativa Japonica Group]
PB.402.1	LOC_Os01g42770.1	--	--	Molecular Function: GTPase activity (GO:0003924);; Molecular Function: GTP binding (GO:0005525);; Cellular Component: vacuole (GO:0005773);; Biological Process: GTP catabolic process (GO:0006184);; Cellular Component: chloroplast (GO:0009507);; Cellular Component: protein complex (GO:0043234);; Biological Process: protein polymerization (GO:0051258);;	--	--	--	--	Conserved hypothetical protein (Lin0512_fam)	--	S	Function unknown	unknown protein [Oryza sativa Japonica Group]
PB.403.1	LOC_Os01g42830.1	--	--	Biological Process: endocytosis (GO:0006897);; Cellular Component: membrane (GO:0016020);;	--	--	[S]	Function unknown	Protein of unknown function (DUF1681)	Uncharacterized protein At1g03900 OS=Arabidopsis thaliana (Mouse-ear cress) PE=2 SV=1	S	Function unknown	unknown protein [Oryza sativa Japonica Group]
PB.404.1	LOC_Os01g42950.1	[RTKL]	--	Molecular Function: protein kinase activity (GO:0004672);; Molecular Function: ATP binding (GO:0005524);; Biological Process: protein phosphorylation (GO:0006468);; Cellular Component: membrane (GO:0016020);;	K17541|0|obr:102710549|SCY1-like protein 2-like; K17541 SCY1-like protein 2 (A)	--	[T]	Signal transduction mechanisms	Protein kinase domain;; Protein tyrosine kinase	Mitogen-activated protein kinase 14 OS=Oryza sativa subsp. japonica (Rice) PE=2 SV=1	T	Signal transduction mechanisms	hypothetical protein OsJ_02609 [Oryza sativa Japonica Group]
PB.405.1	LOC_Os01g42980.1	[J]	Translation, ribosomal structure and biogenesis	Molecular Function: structural constituent of ribosome (GO:0003735);; Molecular Function: GTPase activity (GO:0003924);; Molecular Function: GTP binding (GO:0005525);; Cellular Component: mitochondrion (GO:0005739);; Biological Process: GTP catabolic process (GO:0006184);; Biological Process: translation (GO:0006412);; Cellular Component: chloroplast (GO:0009507);; Cellular Component: large ribos…	K02890|3.9497e-161|osa:4326653|Os01g0616500; K02890 large subunit ribosomal protein L22 (A)	ko03010:Ribosome	[J]	Translation, ribosomal structure and biogenesis	Ribosomal protein L22p/L17e	50S ribosomal protein L22, chloroplastic GN=rpl22 OS=Odontella sinensis (Marine centric diatom) PE=3 SV=1	J	Translation, ribosomal structure and biogenesis	Os01g0616500 [Oryza sativa Japonica Group]
PB.406.1	PB.406.1	--	--	Molecular Function: UDP-N-acetylmuramate dehydrogenase activity (GO:0008762);; Cellular Component: plastid (GO:0009536);; Molecular Function: flavin adenine dinucleotide binding (GO:0050660);; Biological Process: oxidation-reduction process (GO:0055114);;	--	--	--	--	--	--	S	Function unknown	Os01g0616600 [Oryza sativa Japonica Group]
PB.407.1	LOC_Os01g43070.1	--	--	Biological Process: maltose metabolic process (GO:0000023);; Molecular Function: calcium ion binding (GO:0005509);; Cellular Component: chloroplast thylakoid membrane (GO:0009535);; Cellular Component: chloroplast thylakoid lumen (GO:0009543);; Cellular Component: photosystem II oxygen evolving complex (GO:0009654);; Biological Process: thylakoid membrane organization (GO:0010027);; Biological Pr…	--	--	--	--	PsbP	PsbP domain-containing protein 5, chloroplastic (Precursor) GN=PPD5 OS=Arabidopsis thaliana (Mouse-ear cress) PE=1 SV=3	S	Function unknown	hypothetical protein OsI_02877 [Oryza sativa Indica Group]
PB.407.2	PB.407.2	--	--	Biological Process: maltose metabolic process (GO:0000023);; Molecular Function: calcium ion binding (GO:0005509);; Cellular Component: chloroplast thylakoid membrane (GO:0009535);; Cellular Component: chloroplast thylakoid lumen (GO:0009543);; Cellular Component: photosystem II oxygen evolving complex (GO:0009654);; Biological Process: thylakoid membrane organization (GO:0010027);; Biological Pr…	--	--	--	--	PsbP	PsbP domain-containing protein 5, chloroplastic (Precursor) GN=PPD5 OS=Arabidopsis thaliana (Mouse-ear cress) PE=1 SV=3	S	Function unknown	unknown protein [Oryza sativa Japonica Group]
PB.408.1	LOC_Os01g43120.1	[LKJ]	--	Molecular Function: RNA binding (GO:0003723);; Molecular Function: ATP binding (GO:0005524);; Molecular Function: ATP-dependent helicase activity (GO:0008026);; Biological Process: response to cold (GO:0009409);; Biological Process: response to water deprivation (GO:0009414);; Cellular Component: chloroplast (GO:0009507);; Biological Process: response to salt stress (GO:0009651);;	--	--	[A]	RNA processing and modification	DEAD/DEAH box helicase;; Helicase conserved C-terminal domain;; Type III restriction enzyme, res subunit	DEAD-box ATP-dependent RNA helicase 25 OS=Oryza sativa subsp. japonica (Rice) PE=2 SV=1	L	Replication, recombination and repair	Os01g0618400 [Oryza sativa Japonica Group]
PB.409.1	LOC_Os01g43130.1	[LKJ]	--	Molecular Function: RNA binding (GO:0003723);; Molecular Function: ATP binding (GO:0005524);; Molecular Function: ATP-dependent helicase activity (GO:0008026);; Biological Process: response to cold (GO:0009409);; Biological Process: response to water deprivation (GO:0009414);; Cellular Component: chloroplast (GO:0009507);; Biological Process: response to salt stress (GO:0009651);;	--	--	[A]	RNA processing and modification	DEAD/DEAH box helicase;; Helicase conserved C-terminal domain;; Type III restriction enzyme, res subunit	DEAD-box ATP-dependent RNA helicase 26 OS=Oryza sativa subsp. japonica (Rice) PE=2 SV=1	L	Replication, recombination and repair	Os01g0618500 [Oryza sativa Japonica Group]
PB.410.1	LOC_Os01g43160.1	[M]	Cell wall/membrane/envelope biogenesis	Molecular Function: polygalacturonase activity (GO:0004650);; Cellular Component: extracellular region (GO:0005576);; Biological Process: carbohydrate metabolic process (GO:0005975);; Cellular Component: membrane (GO:0016020);; Cellular Component: cytoplasmic membrane-bounded vesicle (GO:0016023);;	--	--	--	--	Glycosyl hydrolases family 28;; Pectate lyase superfamily protein;; Right handed beta helix region	Probable polygalacturonase OS=Vitis vinifera (Grape) PE=1 SV=1	M	Cell wall/membrane/envelope biogenesis	hypothetical protein OsI_02888 [Oryza sativa Indica Group]
PB.411.1	LOC_Os01g43370.1	--	--	--	--	--	--	--	--	Probable WRKY transcription factor 19 GN=WRKY19 OS=Arabidopsis thaliana (Mouse-ear cress) PE=2 SV=1	S	Function unknown	Os01g0621900 [Oryza sativa Japonica Group]
PB.411.2	PB.411.2	--	--	--	--	--	--	--	--	Probable WRKY transcription factor 19 GN=WRKY19 OS=Arabidopsis thaliana (Mouse-ear cress) PE=2 SV=1	S	Function unknown	Os01g0621900 [Oryza sativa Japonica Group]
PB.411.3	LOC_Os01g43370.1	--	--	--	--	--	--	--	--	Probable WRKY transcription factor 19 GN=WRKY19 OS=Arabidopsis thaliana (Mouse-ear cress) PE=2 SV=1	S	Function unknown	Os01g0621900 [Oryza sativa Japonica Group]
PB.411.4	PB.411.4	--	--	--	--	--	--	--	--	Probable WRKY transcription factor 19 GN=WRKY19 OS=Arabidopsis thaliana (Mouse-ear cress) PE=2 SV=1	S	Function unknown	hypothetical protein OsI_02907 [Oryza sativa Indica Group]
PB.412.1	LOC_Os01g43410.1	[RTKL]	--	Molecular Function: protein serine/threonine kinase activity (GO:0004674);; Molecular Function: calcium ion binding (GO:0005509);; Molecular Function: ATP binding (GO:0005524);; Cellular Component: vacuole (GO:0005773);; Cellular Component: plasma membrane (GO:0005886);; Biological Process: protein phosphorylation (GO:0006468);; Biological Process: response to salt stress (GO:0009651);; Biologica…	K13412|0|dosa:Os01t0622600-01|Os01g0622600; Similar to calcium-dependent protein kinase, isoform 2.; K13412 calcium-dependent protein kinase [EC:2.7.11.1] (A)	ko04626:Plant-pathogen interaction	[T]	Signal transduction mechanisms	Protein kinase domain;; EF hand;; EF-hand domain pair;; Protein tyrosine kinase;; EF-hand domain;; EF-hand domain pair;; EF hand;; Cytoskeletal-regulatory complex EF hand;; Kinase-like;; Secreted protein acidic and rich in cysteine Ca binding region	Calcium-dependent protein kinase 3 GN=F9D16.120 OS=Arabidopsis thaliana (Mouse-ear cress) PE=1 SV=1	T	Signal transduction mechanisms	putative calcium-dependent protein kinase [Oryza sativa Japonica Group]
PB.413.1	PB.413.1	[O]	Posttranslational modification, protein turnover, chaperones	Molecular Function: ATP binding (GO:0005524);; Molecular Function: nucleoside-triphosphatase activity (GO:0017111);; Biological Process: cell division (GO:0051301);;	--	--	[O]	Posttranslational modification, protein turnover, chaperones	ATPase family associated with various cellular activities (AAA);; AAA domain;; AAA domain (dynein-related subfamily);; AAA domain (Cdc48 subfamily);; Holliday junction DNA helicase ruvB N-terminus	Katanin p60 ATPase-containing subunit A1 {ECO:0000255|HAMAP-Rule:MF_03023} GN=At1g80350 OS=Arabidopsis thaliana (Mouse-ear cress) PE=1 SV=1	O	Posttranslational modification, protein turnover, chaperones	Os01g0623500 [Oryza sativa Japonica Group]
PB.414.1	LOC_Os01g43540.1	[R]	General function prediction only	Molecular Function: protein binding (GO:0005515);; Cellular Component: nucleus (GO:0005634);; Cellular Component: cytoplasm (GO:0005737);; Biological Process: ubiquitin-dependent protein catabolic process (GO:0006511);; Biological Process: auxin-activated signaling pathway (GO:0009734);; Biological Process: jasmonic acid mediated signaling pathway (GO:0009867);; Biological Process: defense respon…	K12795|0|osa:4326682|Os01g0624500; K12795 suppressor of G2 allele of SKP1 (A)	ko04626:Plant-pathogen interaction	[T]	Signal transduction mechanisms	SGS domain;; CS domain;; TPR repeat;; Tetratricopeptide repeat;; Tetratricopeptide repeat;; Tetratricopeptide repeat;; Tetratricopeptide repeat;; Tetratricopeptide repeat;; Tetratricopeptide repeat;; Tetratricopeptide repeat;; Tetratricopeptide repeat	Protein SGT1 homolog GN=OsJ_02663 OS=Oryza sativa subsp. japonica (Rice) PE=1 SV=1	S	Function unknown	Os01g0624500 [Oryza sativa Japonica Group]
PB.415.1	LOC_Os01g43580.1	[Z]	Cytoskeleton	Molecular Function: microtubule motor activity (GO:0003777);; Molecular Function: ATP binding (GO:0005524);; Cellular Component: nucleus (GO:0005634);; Cellular Component: kinesin complex (GO:0005871);; Cellular Component: microtubule (GO:0005874);; Cellular Component: plasma membrane (GO:0005886);; Biological Process: microtubule-based movement (GO:0007018);; Molecular Function: microtubule bind…	K10393|0|obr:102718045|kinesin-related protein 6-like; K10393 kinesin family member 2/24 (A)	--	[Z]	Cytoskeleton	Kinesin motor domain	Kinesin-13A GN=KINESIN-13A OS=Arabidopsis thaliana (Mouse-ear cress) PE=1 SV=1	Z	Cytoskeleton	hypothetical protein OsI_02924 [Oryza sativa Indica Group]
PB.416.1	LOC_Os01g43630.2	[U]	Intracellular trafficking, secretion, and vesicular transport	Biological Process: protein N-linked glycosylation (GO:0006487);; Biological Process: intracellular protein transport (GO:0006886);; Molecular Function: protein transporter activity (GO:0008565);; Cellular Component: clathrin adaptor complex (GO:0030131);; Biological Process: cellulose biosynthetic process (GO:0030244);; Molecular Function: protein histidine kinase binding (GO:0043424);; Biologic…	--	--	[U]	Intracellular trafficking, secretion, and vesicular transport	Adaptin N terminal region;; Beta2-adaptin appendage, C-terminal sub-domain;; HEAT repeats;; non-SMC mitotic condensation complex subunit 1	Beta-adaptin-like protein A GN=BETAA-AD OS=Arabidopsis thaliana (Mouse-ear cress) PE=1 SV=1	U	Intracellular trafficking, secretion, and vesicular transport	beta adaptin-like [Oryza sativa Japonica Group]
PB.417.1	LOC_Os01g43700.1	[Q]	Secondary metabolites biosynthesis, transport and catabolism	Molecular Function: monooxygenase activity (GO:0004497);; Molecular Function: iron ion binding (GO:0005506);; Cellular Component: endoplasmic reticulum (GO:0005783);; Molecular Function: electron carrier activity (GO:0009055);; Biological Process: response to light stimulus (GO:0009416);; Biological Process: unidimensional cell growth (GO:0009826);; Cellular Component: cytoplasmic membrane-bounde…	--	--	[QI]	--	Cytochrome P450	Cytochrome P450 72A13 GN=CYP72A13 OS=Arabidopsis thaliana (Mouse-ear cress) PE=2 SV=1	Q	Secondary metabolites biosynthesis, transport and catabolism	Os01g0627400 [Oryza sativa Japonica Group]
PB.418.1	PB.418.1	--	--	Molecular Function: monooxygenase activity (GO:0004497);; Molecular Function: iron ion binding (GO:0005506);; Cellular Component: endoplasmic reticulum (GO:0005783);; Molecular Function: electron carrier activity (GO:0009055);; Molecular Function: oxidoreductase activity, acting on paired donors, with incorporation or reduction of molecular oxygen (GO:0016705);; Molecular Function: heme binding (…	--	--	[QI]	--	Cytochrome P450	Cytochrome P450 72A14 GN=CYP72A14 OS=Arabidopsis thaliana (Mouse-ear cress) PE=2 SV=1	Q	Secondary metabolites biosynthesis, transport and catabolism	hypothetical protein OsJ_02694 [Oryza sativa Japonica Group]
PB.419.1	LOC_Os01g43870.1	--	--	Cellular Component: plastid (GO:0009536);; Biological Process: dephosphorylation (GO:0016311);; Molecular Function: phosphatase activity (GO:0016791);;	K17616|0|obr:102718595|CTD small phosphatase-like protein 2-like; K17616 CTD small phosphatase-like protein 2 [EC:3.1.3.-] (A)	--	[K]	Transcription	NLI interacting factor-like phosphatase	Mitochondrial import inner membrane translocase subunit TIM50 (Precursor) GN=TIM50 OS=Phytophthora infestans (Potato late blight fungus) PE=2 SV=1	K	Transcription	hypothetical protein OsJ_02697 [Oryza sativa Japonica Group]
PB.419.2	PB.419.2	--	--	Cellular Component: plastid (GO:0009536);; Biological Process: dephosphorylation (GO:0016311);; Molecular Function: phosphatase activity (GO:0016791);;	--	--	[K]	Transcription	NLI interacting factor-like phosphatase	Mitochondrial import inner membrane translocase subunit TIM50 (Precursor) GN=F14J16.15 OS=Arabidopsis thaliana (Mouse-ear cress) PE=1 SV=1	K	Transcription	Os01g0629400 [Oryza sativa Japonica Group]
PB.420.1	LOC_Os01g44040.1	--	--	Cellular Component: membrane (GO:0016020);; Cellular Component: cytoplasmic membrane-bounded vesicle (GO:0016023);; Molecular Function: transferase activity (GO:0016740);;	--	--	[R]	General function prediction only	10 TM Acyl Transferase domain found in Cas1p	--	S	Function unknown	Os01g0631100 [Oryza sativa Japonica Group]
PB.420.2	LOC_Os01g44040.1	--	--	Cellular Component: membrane (GO:0016020);; Cellular Component: cytoplasmic membrane-bounded vesicle (GO:0016023);; Molecular Function: transferase activity (GO:0016740);;	--	--	[R]	General function prediction only	10 TM Acyl Transferase domain found in Cas1p	--	S	Function unknown	Os01g0631100 [Oryza sativa Japonica Group]
PB.421.1	LOC_Os01g44069.1	--	--	Molecular Function: 1-acylglycerol-3-phosphate O-acyltransferase activity (GO:0003841);; Cellular Component: mitochondrion (GO:0005739);; Biological Process: phosphatidylglycerol biosynthetic process (GO:0006655);; Cellular Component: membrane (GO:0016020);; Biological Process: pollen sperm cell differentiation (GO:0048235);; Biological Process: response to karrikin (GO:0080167);; Molecular Funct…	K13508|0|zma:100382138|hypothetical protein; K13508 glycerol-3-phosphate acyltransferase [EC:2.3.1.15] (A)	ko00561:Glycerolipid metabolism;ko00564:Glycerophospholipid metabolism	--	--	Acyltransferase	Glycerol-3-phosphate acyltransferase 1 GN=GPAT1 OS=Arabidopsis thaliana (Mouse-ear cress) PE=1 SV=1	I	Lipid transport and metabolism	hypothetical protein OsI_02955 [Oryza sativa Indica Group]
PB.422.1	LOC_Os01g44090.1	--	--	--	--	--	--	--	X8 domain	Glucan endo-1,3-beta-glucosidase 7 (Precursor) GN=At4g34480 OS=Arabidopsis thaliana (Mouse-ear cress) PE=1 SV=2	S	Function unknown	Os01g0631500 [Oryza sativa Japonica Group]
PB.423.1	LOC_Os01g44110.1	[RTKL]	--	Molecular Function: protein serine/threonine kinase activity (GO:0004674);; Molecular Function: ATP binding (GO:0005524);; Biological Process: protein phosphorylation (GO:0006468);;	--	--	[T]	Signal transduction mechanisms	Protein kinase domain;; Protein tyrosine kinase	Probable receptor-like protein kinase At2g42960 GN=At2g42960 OS=Arabidopsis thaliana (Mouse-ear cress) PE=3 SV=1	T	Signal transduction mechanisms	Os01g0631700 [Oryza sativa Japonica Group]
PB.424.1	PB.424.1	--	--	--	--	--	--	--	--	--	S	Function unknown	Os09g0103200 [Oryza sativa Japonica Group]
PB.425.1	LOC_Os01g44230.1	--	--	Molecular Function: adenyl nucleotide binding (GO:0030554);; Biological Process: gene silencing by RNA (GO:0031047);;	--	--	--	--	XH domain;; XS domain;; XS zinc finger domain	Protein INVOLVED IN DE NOVO 2 {ECO:0000303|PubMed:19915591} OS=Arabidopsis thaliana (Mouse-ear cress) PE=1 SV=1	S	Function unknown	Os01g0633200 [Oryza sativa Japonica Group]
PB.426.1	LOC_Os01g44260.1	[MG]	--	Molecular Function: nucleotide binding (GO:0000166);; Biological Process: anthocyanin-containing compound biosynthetic process (GO:0009718);; Biological Process: response to sucrose (GO:0009744);; Biological Process: response to UV-B (GO:0010224);; Cellular Component: extrinsic component of endoplasmic reticulum membrane (GO:0042406);; Biological Process: cellular metabolic process (GO:0044237);;…	K13082|0|dosa:Os01t0633500-00|Os01g0633500; Similar to Dihydroflavonol reductase.; K13082 bifunctional dihydroflavonol 4-reductase/flavanone 4-reductase [EC:1.1.1.219 1.1.1.234] (A)	ko00941:Flavonoid biosynthesis	[V]	Defense mechanisms	NAD dependent epimerase/dehydratase family;; Male sterility protein	Dihydroflavonol-4-reductase GN=ANT18 OS=Hordeum vulgare (Barley) PE=3 SV=1	M	Cell wall/membrane/envelope biogenesis	putative NADPH-dependent reductase A1 [Oryza sativa Japonica Group]
PB.427.1	LOC_Os01g44390.1	--	--	Molecular Function: DNA binding (GO:0003677);; Molecular Function: chromatin binding (GO:0003682);; Cellular Component: nucleus (GO:0005634);; Biological Process: gravitropism (GO:0009630);; Biological Process: embryo development ending in seed dormancy (GO:0009793);; Biological Process: response to red light (GO:0010114);;	--	--	[O]	Posttranslational modification, protein turnover, chaperones	--	Protein RADIALIS-like 6 GN=F22H5.3 OS=Arabidopsis thaliana (Mouse-ear cress) PE=2 SV=1	K	Transcription	Os01g0635200 [Oryza sativa Japonica Group]
PB.428.1	PB.428.1	--	--	Molecular Function: polygalacturonase activity (GO:0004650);; Cellular Component: extracellular region (GO:0005576);; Cellular Component: mitochondrion (GO:0005739);; Biological Process: carbohydrate metabolic process (GO:0005975);;	--	--	--	--	Glycosyl hydrolases family 28;; Pectate lyase superfamily protein;; Glycosyl hydrolases family 28	Polygalacturonase At1g48100 (Precursor) GN=At1g48100 OS=Arabidopsis thaliana (Mouse-ear cress) PE=2 SV=1	M	Cell wall/membrane/envelope biogenesis	PREDICTED: polygalacturonase At1g48100-like [Setaria italica]
PB.428.2	PB.428.2	[M]	Cell wall/membrane/envelope biogenesis	Molecular Function: polygalacturonase activity (GO:0004650);; Cellular Component: extracellular region (GO:0005576);; Cellular Component: mitochondrion (GO:0005739);; Biological Process: carbohydrate metabolic process (GO:0005975);;	--	--	--	--	Glycosyl hydrolases family 28;; Pectate lyase superfamily protein	Polygalacturonase At1g48100 (Precursor) GN=At1g48100 OS=Arabidopsis thaliana (Mouse-ear cress) PE=2 SV=1	M	Cell wall/membrane/envelope biogenesis	Os01g0636500 [Oryza sativa Japonica Group]
PB.428.3	PB.428.3	--	--	Molecular Function: polygalacturonase activity (GO:0004650);; Cellular Component: extracellular region (GO:0005576);; Cellular Component: mitochondrion (GO:0005739);; Biological Process: carbohydrate metabolic process (GO:0005975);;	--	--	--	--	Glycosyl hydrolases family 28;; Pectate lyase superfamily protein;; Glycosyl hydrolases family 28;; Glycosyl hydrolases family 28	Polygalacturonase At1g48100 (Precursor) GN=At1g48100 OS=Arabidopsis thaliana (Mouse-ear cress) PE=2 SV=1	S	Function unknown	hypothetical protein OsI_03000 [Oryza sativa Indica Group]
PB.429.1	LOC_Os01g45090.1	[KAD]	--	Molecular Function: DNA binding (GO:0003677);; Molecular Function: chromatin binding (GO:0003682);;	K09422|1.25441e-145|dosa:Os01t0637800-00|Os01g0637800; Similar to Transcription factor (Fragment).; K09422 myb proto-oncogene protein, plant (A)	--	[K]	Transcription	Myb-like DNA-binding domain;; Myb-like DNA-binding domain	Transcription factor MYB21 GN=MGF10.23 OS=Arabidopsis thaliana (Mouse-ear cress) PE=1 SV=1	K	Transcription	Os01g0637800 [Oryza sativa Japonica Group]
PB.430.1	LOC_Os01g45140.1	--	--	Biological Process: metabolic process (GO:0008152);; Molecular Function: abscisic acid glucosyltransferase activity (GO:0010294);; Cellular Component: cytoplasmic membrane-bounded vesicle (GO:0016023);; Biological Process: secretion by cell (GO:0032940);; Biological Process: response to other organism (GO:0051707);; Molecular Function: quercetin 3-O-glucosyltransferase activity (GO:0080043);; Mol…	--	--	[GC]	--	UDP-glucoronosyl and UDP-glucosyl transferase	Scopoletin glucosyltransferase GN=TOGT1 OS=Nicotiana tabacum (Common tobacco) PE=1 SV=1	S	Function unknown	Os01g0638600 [Oryza sativa Japonica Group]
PB.431.1	LOC_Os01g45190.1	[LKJ]	--	Biological Process: response to hypoxia (GO:0001666);; Molecular Function: RNA binding (GO:0003723);; Molecular Function: ATP binding (GO:0005524);; Cellular Component: nucleolus (GO:0005730);; Biological Process: rRNA processing (GO:0006364);; Biological Process: mRNA processing (GO:0006397);; Molecular Function: ATP-dependent helicase activity (GO:0008026);; Cellular Component: membrane (GO:001…	K13025|0|osa:4326580|Os01g0639100; K13025 ATP-dependent RNA helicase [EC:3.6.4.13] (A)	ko03013:RNA transport;ko03015:mRNA surveillance pathway;ko03040:Spliceosome	[J]	Translation, ribosomal structure and biogenesis	DEAD/DEAH box helicase;; Helicase conserved C-terminal domain	DEAD-box ATP-dependent RNA helicase 2 OS=Oryza sativa subsp. japonica (Rice) PE=2 SV=1	L	Replication, recombination and repair	Os01g0639100 [Oryza sativa Japonica Group]
PB.432.1	LOC_Os01g45274.1	[P]	Inorganic ion transport and metabolism	Molecular Function: carbonate dehydratase activity (GO:0004089);; Molecular Function: zinc ion binding (GO:0008270);; Cellular Component: chloroplast stroma (GO:0009570);; Biological Process: carbon utilization (GO:0015976);;	K01673|2.66123e-161|dosa:Os01t0639900-01|Os01g0639900; Similar to Carbonic anhydrase, chloroplast precursor (EC 4.2.1.1) (Carbonate dehydratase).; K01673 carbonic anhydrase [EC:4.2.1.1] (A)	ko00910:Nitrogen metabolism	[P]	Inorganic ion transport and metabolism	Carbonic anhydrase	Carbonic anhydrase, chloroplastic (Precursor) OS=Hordeum vulgare (Barley) PE=2 SV=1	P	Inorganic ion transport and metabolism	carbonic anhydrase [Oryza sativa]
PB.433.1	LOC_Os01g45550.2	--	--	Biological Process: auxin-activated signaling pathway (GO:0009734);; Cellular Component: integral component of membrane (GO:0016021);; Cellular Component: cytoplasmic membrane-bounded vesicle (GO:0016023);; Biological Process: transmembrane transport (GO:0055085);;	K13947|0|dosa:Os01t0643300-01|Os01g0643300, PIN3A, PIN_PROTEIN_3A; Similar to PIN1-like auxin transport protein.; K13947 auxin efflux carrier family (A)	--	--	--	Membrane transport protein	Probable auxin efflux carrier component 3a OS=Oryza sativa subsp. japonica (Rice) PE=2 SV=1	U	Intracellular trafficking, secretion, and vesicular transport	RecName: Full=Probable auxin efflux carrier component 3a; AltName: Full=OsPIN3a [Oryza sativa Japonica Group]
PB.434.1	LOC_Os01g45640.1	--	--	--	--	--	--	--	--	--	S	Function unknown	Os01g0644000 [Oryza sativa Japonica Group]
PB.435.1	LOC_Os01g45700.1	--	--	Cellular Component: cytoplasmic membrane-bounded vesicle (GO:0016023);;	--	--	--	--	--	--	S	Function unknown	Os01g0644600 [Oryza sativa Japonica Group]
PB.436.1	LOC_Os01g45750.1	[R]	General function prediction only	Biological Process: maltose metabolic process (GO:0000023);; Biological Process: plasma membrane pyruvate transport (GO:0006849);; Molecular Function: bile acid:sodium symporter activity (GO:0008508);; Cellular Component: chloroplast thylakoid (GO:0009534);; Cellular Component: chloroplast envelope (GO:0009941);; Cellular Component: integral component of membrane (GO:0016021);; Biological Process…	K03453|0|osa:4325917|Os01g0645200; K03453 bile acid:Na+ symporter, BASS family (A)	--	[P]	Inorganic ion transport and metabolism	Sodium Bile acid symporter family;; SBF-like CPA transporter family (DUF4137)	Probable sodium/metabolite cotransporter BASS2, chloroplastic (Precursor) OS=Oryza sativa subsp. japonica (Rice) PE=2 SV=1	S	Function unknown	Os01g0645200 [Oryza sativa Japonica Group]
PB.437.1	LOC_Os01g45960.1	[R]	General function prediction only	Biological Process: metabolic process (GO:0008152);; Cellular Component: membrane (GO:0016020);; Molecular Function: hydrolase activity (GO:0016787);;	--	--	[R]	General function prediction only	Alpha/beta hydrolase family;; Alpha/beta hydrolase family;; alpha/beta hydrolase fold;; TAP-like protein	--	S	Function unknown	Os01g0647700 [Oryza sativa Japonica Group]
PB.438.1	LOC_Os01g46060.1	--	--	--	K14546|0|osa:4326248|Os01g0649000; K14546 U3 small nucleolar RNA-associated protein 5 (A)	ko03008:Ribosome biogenesis in eukaryotes	[R]	General function prediction only	Dip2/Utp12 Family;; WD domain, G-beta repeat	--	S	Function unknown	Os01g0649000 [Oryza sativa Japonica Group]
PB.439.1	LOC_Os01g46070.1	[C]	Energy production and conversion	Molecular Function: copper ion binding (GO:0005507);; Cellular Component: cell wall (GO:0005618);; Cellular Component: mitochondrion (GO:0005739);; Biological Process: tricarboxylic acid cycle (GO:0006099);; Biological Process: malate metabolic process (GO:0006108);; Biological Process: response to cold (GO:0009409);; Cellular Component: chloroplast (GO:0009507);; Biological Process: response to …	K00026|0|osa:4326249|Os01g0649100; K00026 malate dehydrogenase [EC:1.1.1.37] (A)	ko00020:Citrate cycle (TCA cycle);ko00270:Cysteine and methionine metabolism;ko00620:Pyruvate metabolism;ko00630:Glyoxylate and dicarboxylate metabolism;ko00710:Carbon fixation in photosynthetic organisms;ko01200:Carbon metabolism	[C]	Energy production and conversion	lactate/malate dehydrogenase, NAD binding domain;; lactate/malate dehydrogenase, alpha/beta C-terminal domain	Malate dehydrogenase, mitochondrial (Precursor) GN=MMDHI OS=Fragaria ananassa (Strawberry) PE=1 SV=1	C	Energy production and conversion	Os01g0649100 [Oryza sativa Japonica Group]
PB.440.1	LOC_Os01g46080.1	--	--	Biological Process: lipid metabolic process (GO:0006629);; Cellular Component: cytoplasmic membrane-bounded vesicle (GO:0016023);; Molecular Function: hydrolase activity, acting on ester bonds (GO:0016788);;	--	--	--	--	GDSL-like Lipase/Acylhydrolase	GDSL esterase/lipase At1g28600 (Precursor) GN=At1g28600 OS=Arabidopsis thaliana (Mouse-ear cress) PE=2 SV=1	S	Function unknown	hypothetical protein OsI_03071 [Oryza sativa Indica Group]
PB.441.1	LOC_Os01g46120.1	--	--	Biological Process: lipid metabolic process (GO:0006629);; Cellular Component: cytoplasmic membrane-bounded vesicle (GO:0016023);; Molecular Function: hydrolase activity, acting on ester bonds (GO:0016788);;	--	--	--	--	GDSL-like Lipase/Acylhydrolase	GDSL esterase/lipase At1g28600 (Precursor) GN=At1g28600 OS=Arabidopsis thaliana (Mouse-ear cress) PE=2 SV=1	S	Function unknown	Os01g0649900 [Oryza sativa Japonica Group]
PB.442.1	PB.442.1	--	--	Cellular Component: mitochondrion (GO:0005739);; Biological Process: lipid metabolic process (GO:0006629);; Cellular Component: cytoplasmic membrane-bounded vesicle (GO:0016023);; Molecular Function: hydrolase activity, acting on ester bonds (GO:0016788);;	--	--	--	--	GDSL-like Lipase/Acylhydrolase;; GDSL-like Lipase/Acylhydrolase	GDSL esterase/lipase At1g28600 (Precursor) GN=At1g28600 OS=Arabidopsis thaliana (Mouse-ear cress) PE=2 SV=1	--	--	hypothetical protein OsJ_02827 [Oryza sativa Japonica Group]
PB.443.1	PB.443.1	--	--	Biological Process: lipid metabolic process (GO:0006629);; Cellular Component: cytoplasmic membrane-bounded vesicle (GO:0016023);; Molecular Function: hydrolase activity, acting on ester bonds (GO:0016788);;	--	--	--	--	GDSL-like Lipase/Acylhydrolase	GDSL esterase/lipase At1g28590 (Precursor) GN=At1g28590 OS=Arabidopsis thaliana (Mouse-ear cress) PE=2 SV=2	S	Function unknown	hypothetical protein OsI_03085 [Oryza sativa Indica Group]
PB.444.1	LOC_Os01g46340.1	--	--	Cellular Component: plastid (GO:0009536);;	--	--	--	--	--	Protein CHUP1, chloroplastic GN=CHUP1 OS=Arabidopsis thaliana (Mouse-ear cress) PE=1 SV=1	S	Function unknown	hypothetical protein OsJ_02842 [Oryza sativa Japonica Group]
PB.445.1	PB.445.1	[EH]	--	Molecular Function: magnesium ion binding (GO:0000287);; Molecular Function: ketol-acid reductoisomerase activity (GO:0004455);; Molecular Function: copper ion binding (GO:0005507);; Cellular Component: cell wall (GO:0005618);; Cellular Component: mitochondrion (GO:0005739);; Biological Process: isoleucine biosynthetic process (GO:0009097);; Biological Process: valine biosynthetic process (GO:000…	K00053|0|osa:4325375|Os01g0652600; K00053 ketol-acid reductoisomerase [EC:1.1.1.86] (A)	ko00290:Valine, leucine and isoleucine biosynthesis;ko00770:Pantothenate and CoA biosynthesis;ko01210:2-Oxocarboxylic acid metabolism;ko01230:Biosynthesis of amino acids	--	--	Acetohydroxy acid isomeroreductase, catalytic domain;; Acetohydroxy acid isomeroreductase, catalytic domain;; Acetohydroxy acid isomeroreductase, catalytic domain	Ketol-acid reductoisomerase, chloroplastic (Precursor) GN=OJ1735_C10.18 OS=Oryza sativa subsp. japonica (Rice) PE=1 SV=1	E	Amino acid transport and metabolism	hypothetical protein OsJ_02845 [Oryza sativa Japonica Group]
PB.446.1	LOC_Os01g46500.1	--	--	Molecular Function: DNA binding (GO:0003677);; Molecular Function: RNA binding (GO:0003723);; Molecular Function: RNA-directed DNA polymerase activity (GO:0003964);; Cellular Component: mitochondrion (GO:0005739);; Biological Process: RNA-dependent DNA replication (GO:0006278);; Biological Process: DNA recombination (GO:0006310);;	--	--	--	--	F-box domain	Putative F-box/FBD/LRR-repeat protein At3g49030 GN=At3g49030 OS=Arabidopsis thaliana (Mouse-ear cress) PE=2 SV=1	L	Replication, recombination and repair	Os01g0653700 [Oryza sativa Japonica Group]
PB.447.1	LOC_Os01g46570.1	[F]	Nucleotide transport and metabolism	Molecular Function: CTP synthase activity (GO:0003883);; Biological Process: pyrimidine nucleotide biosynthetic process (GO:0006221);; Cellular Component: cytoplasmic membrane-bounded vesicle (GO:0016023);;	K01937|0|osa:4324172|Os01g0654100; K01937 CTP synthase [EC:6.3.4.2] (A)	ko00240:Pyrimidine metabolism	[F]	Nucleotide transport and metabolism	CTP synthase N-terminus;; Glutamine amidotransferase class-I;; Peptidase C26	--	F	Nucleotide transport and metabolism	Os01g0654100 [Oryza sativa Japonica Group]
PB.448.1	PB.448.1	--	--	Molecular Function: structural molecule activity (GO:0005198);; Cellular Component: Arp2/3 protein complex (GO:0005885);; Biological Process: trichome morphogenesis (GO:0010090);; Biological Process: regulation of actin filament polymerization (GO:0030833);;	K05758|3.31598e-132|obr:102711476|actin-related protein 2/3 complex subunit 2A-like; K05758 actin related protein 2/3 complex, subunit 2 (A)	--	[Z]	Cytoskeleton	Arp2/3 complex, 34 kD subunit p34-Arc	Actin-related protein 2/3 complex subunit 2A GN=T17H7.13 OS=Arabidopsis thaliana (Mouse-ear cress) PE=1 SV=1	S	Function unknown	hypothetical protein OsI_03108 [Oryza sativa Indica Group]
PB.449.1	PB.449.1	[R]	General function prediction only	Cellular Component: nucleus (GO:0005634);; Molecular Function: methyltransferase activity (GO:0008168);; Molecular Function: zinc ion binding (GO:0008270);; Biological Process: DNA mediated transformation (GO:0009294);; Biological Process: methylation (GO:0032259);;	--	--	[BK]	--	PHD-zinc-finger like domain;; PHD-finger;; PHD-like zinc-binding domain;; PHD-finger;; SET domain	Histone-lysine N-methyltransferase ATX4 GN=T13J8.20 OS=Arabidopsis thaliana (Mouse-ear cress) PE=2 SV=3	S	Function unknown	PREDICTED: histone-lysine N-methyltransferase ATX4-like [Oryza brachyantha]
PB.450.1	LOC_Os01g46750.1	[I]	Lipid transport and metabolism	Molecular Function: catalytic activity (GO:0003824);; Cellular Component: plasma membrane (GO:0005886);; Biological Process: metabolic process (GO:0008152);; Cellular Component: plastid (GO:0009536);;	K01897|0|sita:101773679|long chain acyl-CoA synthetase 4-like; K01897 long-chain acyl-CoA synthetase [EC:6.2.1.3] (A)	ko00061:Fatty acid biosynthesis;ko00071:Fatty acid degradation;ko01212:Fatty acid metabolism;ko04146:Peroxisome	[I]	Lipid transport and metabolism	AMP-binding enzyme	Long chain acyl-CoA synthetase 4 GN=LACS4 OS=Arabidopsis thaliana (Mouse-ear cress) PE=2 SV=1	I	Lipid transport and metabolism	hypothetical protein OsI_03121 [Oryza sativa Indica Group]
PB.451.1	LOC_Os01g46980.1	[C]	Energy production and conversion	Cellular Component: plasma membrane (GO:0005886);; Biological Process: Golgi organization (GO:0007030);; Biological Process: response to cold (GO:0009409);; Biological Process: response to salt stress (GO:0009651);; Cellular Component: plant-type vacuole membrane (GO:0009705);; Biological Process: plant-type cell wall biogenesis (GO:0009832);; Biological Process: ATP hydrolysis coupled proton tra…	K02150|2.64471e-151|osa:4327166|Os01g0659200; K02150 V-type H+-transporting ATPase subunit E (A)	ko00190:Oxidative phosphorylation;ko04145:Phagosome	[C]	Energy production and conversion	ATP synthase (E/31 kDa) subunit	V-type proton ATPase subunit E GN=VATE OS=Citrus limon (Lemon) PE=2 SV=1	C	Energy production and conversion	Os01g0659200 [Oryza sativa Japonica Group]
PB.452.1	LOC_Os01g47050.1	--	--	Molecular Function: ubiquitin-protein transferase activity (GO:0004842);; Biological Process: lipid transport (GO:0006869);; Biological Process: protein ubiquitination (GO:0016567);; Biological Process: organ development (GO:0048513);;	--	--	--	--	F-box-like;; F-box domain	F-box/kelch-repeat protein At3g61590 GN=At3g61590 OS=Arabidopsis thaliana (Mouse-ear cress) PE=1 SV=1	S	Function unknown	Os01g0659900 [Oryza sativa Japonica Group]
PB.453.1	PB.453.1	--	--	Cellular Component: plasma membrane (GO:0005886);; Cellular Component: integral component of membrane (GO:0016021);;	--	--	--	--	Domain of unknown function (DUF588)	CASP-like protein 4A3 GN=At2g36330 OS=Arabidopsis thaliana (Mouse-ear cress) PE=2 SV=1	S	Function unknown	hypothetical protein OsI_03145 [Oryza sativa Indica Group]
PB.454.1	LOC_Os01g47256.3	[J]	Translation, ribosomal structure and biogenesis	Cellular Component: exosome (RNase complex) (GO:0000178);; Molecular Function: RNA binding (GO:0003723);; Molecular Function: exonuclease activity (GO:0004527);; Biological Process: ubiquitin-dependent protein catabolic process (GO:0006511);;	K03681|5.83898e-174|osa:4327851|Os01g0661400; K03681 exosome complex component RRP40 (A)	ko03018:RNA degradation	[J]	Translation, ribosomal structure and biogenesis	--	--	J	Translation, ribosomal structure and biogenesis	Os01g0661400 [Oryza sativa Japonica Group]
PB.455.1	PB.455.1	[R]	General function prediction only	Biological Process: ubiquitin-dependent protein catabolic process (GO:0006511);;	K11866|0|osa:4327852|Os01g0661500; K11866 STAM-binding protein [EC:3.4.19.12] (A)	ko04144:Endocytosis	[T]	Signal transduction mechanisms	JAB1/Mov34/MPN/PAD-1 ubiquitin protease	AMSH-like ubiquitin thioesterase 2 GN=AMSH2 OS=Arabidopsis thaliana (Mouse-ear cress) PE=2 SV=1	S	Function unknown	hypothetical protein OsI_03146 [Oryza sativa Indica Group]
PB.456.1	LOC_Os01g47330.1	[J]	Translation, ribosomal structure and biogenesis	Molecular Function: structural constituent of ribosome (GO:0003735);; Cellular Component: ribosome (GO:0005840);; Biological Process: translation (GO:0006412);; Cellular Component: nucleoid (GO:0009295);; Cellular Component: chloroplast thylakoid membrane (GO:0009535);; Cellular Component: chloroplast stroma (GO:0009570);; Biological Process: defense response to bacterium (GO:0042742);;	K02935|5.61299e-55|sita:101758475|50S ribosomal protein L12, chloroplastic-like; K02935 large subunit ribosomal protein L7/L12 (A)	ko03010:Ribosome	[J]	Translation, ribosomal structure and biogenesis	Ribosomal protein L7/L12 C-terminal domain	50S ribosomal protein L12, chloroplastic (Precursor) GN=P0671D01.26 OS=Oryza sativa subsp. japonica (Rice) PE=2 SV=2	J	Translation, ribosomal structure and biogenesis	RecName: Full=50S ribosomal protein L12, chloroplastic; AltName: Full=CL12; Flags: Precursor [Oryza sativa Japonica Group]
PB.457.1	LOC_Os01g47400.1	[G]	Carbohydrate transport and metabolism	Cellular Component: extracellular region (GO:0005576);; Biological Process: carbohydrate metabolic process (GO:0005975);; Biological Process: seed germination (GO:0009845);; Biological Process: determination of bilateral symmetry (GO:0009855);; Biological Process: polarity specification of adaxial/abaxial axis (GO:0009944);; Biological Process: meristem initiation (GO:0010014);; Biological Proces…	--	--	--	--	Cellulase (glycosyl hydrolase family 5);; Sugar-binding cellulase-like	Mannan endo-1,4-beta-mannosidase 1 (Precursor) GN=P0671D01.40 OS=Oryza sativa subsp. japonica (Rice) PE=2 SV=2	G	Carbohydrate transport and metabolism	RecName: Full=Mannan endo-1,4-beta-mannosidase 1; AltName: Full=Beta-mannanase 1; AltName: Full=Endo-beta-1,4-mannanase 1; AltName: Full=OsMAN1; Flags: Precursor [Oryza sativa Japonica Group]
PB.457.2	PB.457.2	[G]	Carbohydrate transport and metabolism	Cellular Component: extracellular region (GO:0005576);; Biological Process: carbohydrate metabolic process (GO:0005975);; Biological Process: seed germination (GO:0009845);; Biological Process: determination of bilateral symmetry (GO:0009855);; Biological Process: polarity specification of adaxial/abaxial axis (GO:0009944);; Biological Process: meristem initiation (GO:0010014);; Biological Proces…	--	--	--	--	Cellulase (glycosyl hydrolase family 5);; Sugar-binding cellulase-like	Mannan endo-1,4-beta-mannosidase 1 (Precursor) GN=P0671D01.40 OS=Oryza sativa subsp. japonica (Rice) PE=2 SV=2	G	Carbohydrate transport and metabolism	PREDICTED: mannan endo-1,4-beta-mannosidase 1-like [Oryza brachyantha]
PB.458.1	LOC_Os01g47460.1	--	--	Cellular Component: membrane (GO:0016020);; Biological Process: metal ion transport (GO:0030001);; Molecular Function: metal ion transmembrane transporter activity (GO:0046873);; Biological Process: transmembrane transport (GO:0055085);;	--	--	--	--	CorA-like Mg2+ transporter protein	--	S	Function unknown	Os01g0664100 [Oryza sativa Japonica Group]
PB.459.1	LOC_Os01g47490.2	--	--	Cellular Component: plasma membrane (GO:0005886);; Biological Process: translational initiation (GO:0006413);; Cellular Component: translation preinitiation complex (GO:0070993);;	--	--	--	--	cAMP-regulated phosphoprotein/endosulfine conserved region	--	S	Function unknown	Os01g0664500 [Oryza sativa Japonica Group]
PB.460.1	LOC_Os01g47530.1	[RTKL]	--	Biological Process: MAPK cascade (GO:0000165);; Molecular Function: MAP kinase activity (GO:0004707);; Molecular Function: ATP binding (GO:0005524);; Biological Process: protein phosphorylation (GO:0006468);;	--	--	[T]	Signal transduction mechanisms	Protein kinase domain;; Protein tyrosine kinase;; Lipopolysaccharide kinase (Kdo/WaaP) family	Mitogen-activated protein kinase 8 GN=P0003E08.19-1 OS=Oryza sativa subsp. japonica (Rice) PE=2 SV=2	T	Signal transduction mechanisms	Os01g0665200 [Oryza sativa Japonica Group]
PB.461.1	LOC_Os01g47630.1	--	--	Cellular Component: chloroplast thylakoid membrane (GO:0009535);;	--	--	--	--	--	--	S	Function unknown	Os01g0666600 [Oryza sativa Japonica Group]
PB.462.1	PB.462.1	--	--	Biological Process: protein N-linked glycosylation (GO:0006487);; Biological Process: protein targeting to vacuole (GO:0006623);; Biological Process: Golgi organization (GO:0007030);; Biological Process: vacuole organization (GO:0007033);; Cellular Component: plant-type vacuole membrane (GO:0009705);; Biological Process: vegetative to reproductive phase transition of meristem (GO:0010228);; Biolo…	--	--	[U]	Intracellular trafficking, secretion, and vesicular transport	Vps16, C-terminal region;; Vps16, N-terminal region	Protein VACUOLELESS1 GN=VCL1 OS=Arabidopsis thaliana (Mouse-ear cress) PE=1 SV=1	U	Intracellular trafficking, secretion, and vesicular transport	PREDICTED: vacuolar protein sorting-associated protein 16 homolog, partial [Oryza brachyantha]
PB.463.1	LOC_Os01g47730.1	[R]	General function prediction only	Biological Process: phosphorelay signal transduction system (GO:0000160);; Molecular Function: DNA binding (GO:0003677);; Molecular Function: GTP binding (GO:0005525);; Cellular Component: plasma membrane (GO:0005886);; Biological Process: regulation of transcription, DNA-templated (GO:0006355);; Biological Process: intracellular protein transport (GO:0006886);; Biological Process: small GTPase m…	K07976|8.51029e-157|osa:4326321|Os01g0667600; K07976 Rab family, other (A)	--	[U]	Intracellular trafficking, secretion, and vesicular transport	Ras family;; Miro-like protein;; ADP-ribosylation factor family;; 50S ribosome-binding GTPase	Ras-related protein RABA1f GN=RABA1F OS=Arabidopsis thaliana (Mouse-ear cress) PE=2 SV=1	S	Function unknown	Os01g0667600 [Oryza sativa Japonica Group]
PB.464.1	LOC_Os01g47770.1	--	--	--	--	--	[T]	Signal transduction mechanisms	CS domain	Protein BOBBER 2 GN=BOB2 OS=Arabidopsis thaliana (Mouse-ear cress) PE=2 SV=1	S	Function unknown	Os01g0668000 [Oryza sativa Japonica Group]
PB.465.1	PB.465.1	--	--	Molecular Function: sequence-specific DNA binding transcription factor activity (GO:0003700);; Cellular Component: nucleus (GO:0005634);; Biological Process: regulation of transcription, DNA-templated (GO:0006355);; Molecular Function: sequence-specific DNA binding (GO:0043565);;	--	--	--	--	--	--	K	Transcription	hypothetical protein OsJ_02965 [Oryza sativa Japonica Group]
PB.466.2	LOC_Os01g48190.1	--	--	--	--	--	--	--	Stress-induced protein Di19, C-terminal;; Drought induced 19 protein (Di19), zinc-binding	Protein DEHYDRATION-INDUCED 19 homolog 3 OS=Oryza sativa subsp. japonica (Rice) PE=2 SV=1	S	Function unknown	Os01g0672400 [Oryza sativa Japonica Group]
PB.467.1	LOC_Os01g48210.1	[L]	Replication, recombination and repair	Molecular Function: nucleic acid binding (GO:0003676);; Biological Process: mitotic recombination (GO:0006312);; Biological Process: embryo sac egg cell differentiation (GO:0009560);; Biological Process: abscisic acid biosynthetic process (GO:0009688);; Molecular Function: nucleotidyltransferase activity (GO:0016779);;	K03514|0|osa:4325901|Os01g0672700; K03514 non-canonical poly(A) RNA polymerase PAPD5/7 [EC:2.7.7.19] (A)	ko03018:RNA degradation	[L]	Replication, recombination and repair	Cid1 family poly A polymerase;; Nucleotidyltransferase domain	--	L	Replication, recombination and repair	Os01g0672700 [Oryza sativa Japonica Group]
PB.468.1	LOC_Os01g48380.1	--	--	Cellular Component: plastid (GO:0009536);; Biological Process: embryo development ending in seed dormancy (GO:0009793);; Biological Process: suspensor development (GO:0010098);;	--	--	[R]	General function prediction only	PPR repeat family;; PPR repeat;; Pentatricopeptide repeat domain;; PPR repeat	Pentatricopeptide repeat-containing protein At1g30610, chloroplastic (Precursor) GN=EMB2279 OS=Arabidopsis thaliana (Mouse-ear cress) PE=2 SV=1	S	Function unknown	hypothetical protein OsJ_02981 [Oryza sativa Japonica Group]
PB.469.1	LOC_Os01g48390.1	[RTKL]	--	Molecular Function: protein kinase activity (GO:0004672);; Molecular Function: ATP binding (GO:0005524);; Biological Process: protein phosphorylation (GO:0006468);; Cellular Component: integral component of membrane (GO:0016021);; Cellular Component: cytoplasmic membrane-bounded vesicle (GO:0016023);;	--	--	--	--	Protein tyrosine kinase;; Protein kinase domain;; Leucine rich repeat N-terminal domain;; Leucine Rich repeats (2 copies);; Leucine Rich Repeat	Probable LRR receptor-like serine/threonine-protein kinase At5g45840 (Precursor) GN=At5g45840 OS=Arabidopsis thaliana (Mouse-ear cress) PE=2 SV=1	T	Signal transduction mechanisms	hypothetical protein OsJ_02982 [Oryza sativa Japonica Group]
PB.470.1	LOC_Os01g48444.1	--	--	Cellular Component: nucleus (GO:0005634);; Biological Process: regulation of transcription, DNA-templated (GO:0006355);; Biological Process: regulation of translation (GO:0006417);; Cellular Component: plastid (GO:0009536);; Biological Process: auxin-activated signaling pathway (GO:0009734);; Molecular Function: protein dimerization activity (GO:0046983);;	K14484|6.35502e-129|osa:4325515|Os01g0675700; K14484 auxin-responsive protein IAA (A)	ko04075:Plant hormone signal transduction	--	--	AUX/IAA family	Auxin-responsive protein IAA5 GN=IAA5 OS=Oryza sativa subsp. indica (Rice) PE=2 SV=2	K	Transcription	RecName: Full=Auxin-responsive protein IAA5; AltName: Full=Indoleacetic acid-induced protein 5 [Oryza sativa Indica Group]
PB.471.1	LOC_Os01g48620.1	--	--	Cellular Component: membrane (GO:0016020);; Cellular Component: cytoplasmic membrane-bounded vesicle (GO:0016023);;	--	--	--	--	Protein of unknown function (DUF2921)	--	S	Function unknown	Os01g0678000 [Oryza sativa Japonica Group]
PB.472.1	LOC_Os01g48690.1	[J]	Translation, ribosomal structure and biogenesis	Molecular Function: RNA binding (GO:0003723);; Molecular Function: structural constituent of ribosome (GO:0003735);; Cellular Component: ribosome (GO:0005840);; Biological Process: rRNA processing (GO:0006364);; Biological Process: translation (GO:0006412);; Cellular Component: chloroplast stroma (GO:0009570);; Cellular Component: chloroplast envelope (GO:0009941);; Biological Process: chlorophyl…	K02968|4.48938e-115|osa:4325273|Os01g0678600; K02968 small subunit ribosomal protein S20 (A)	ko03010:Ribosome	--	--	Ribosomal protein S20	30S ribosomal protein S20, chloroplastic (Precursor) GN=RPS20 OS=Arabidopsis thaliana (Mouse-ear cress) PE=2 SV=1	J	Translation, ribosomal structure and biogenesis	Os01g0678600 [Oryza sativa Japonica Group]
PB.473.1	LOC_Os01g48720.1	--	--	Molecular Function: DNA binding (GO:0003677);; Molecular Function: DNA-directed RNA polymerase activity (GO:0003899);; Biological Process: transcription, DNA-templated (GO:0006351);;	K03023|0|osa:4325277|Os01g0679000; K03023 DNA-directed RNA polymerase III subunit RPC3 (A)	ko00230:Purine metabolism;ko00240:Pyrimidine metabolism;ko03020:RNA polymerase	[K]	Transcription	RNA polymerase III subunit RPC82;; RNA polymerase III subunit RPC82 helix-turn-helix domain;; TFIIE alpha subunit	--	K	Transcription	Os01g0679000 [Oryza sativa Japonica Group]
PB.474.1	PB.474.1	--	--	Molecular Function: GTPase activity (GO:0003924);; Molecular Function: GTP binding (GO:0005525);; Cellular Component: vacuole (GO:0005773);; Cellular Component: microtubule (GO:0005874);; Cellular Component: plasma membrane (GO:0005886);; Biological Process: GTP catabolic process (GO:0006184);; Cellular Component: cell plate (GO:0009504);; Cellular Component: chloroplast thylakoid membrane (GO:00…	--	--	[UR]	--	Dynamin central region;; Dynamin family;; Dynamin GTPase effector domain	Dynamin-related protein 5A OS=Glycine max (Soybean) PE=2 SV=1	S	Function unknown	hypothetical protein OsJ_03020 [Oryza sativa Japonica Group]
PB.476.1	LOC_Os01g48990.1	[R]	General function prediction only	Molecular Function: ATP binding (GO:0005524);; Molecular Function: glycerate kinase activity (GO:0008887);; Cellular Component: chloroplast stroma (GO:0009570);; Biological Process: photorespiration (GO:0009853);; Cellular Component: chloroplast envelope (GO:0009941);; Biological Process: phosphorylation (GO:0016310);;	K15918|0|osa:4324401|Os01g0682500; K15918 D-glycerate 3-kinase [EC:2.7.1.31] (A)	ko00260:Glycine, serine and threonine metabolism;ko00561:Glycerolipid metabolism;ko00630:Glyoxylate and dicarboxylate metabolism	[R]	General function prediction only	Phosphoribulokinase / Uridine kinase family	D-glycerate 3-kinase, chloroplastic (Precursor) GN=GLYK OS=Arabidopsis thaliana (Mouse-ear cress) PE=1 SV=2	G	Carbohydrate transport and metabolism	Os01g0682500 [Oryza sativa Japonica Group]
PB.477.1	LOC_Os01g49000.1	[O]	Posttranslational modification, protein turnover, chaperones	Molecular Function: ATP binding (GO:0005524);; Biological Process: multidimensional cell growth (GO:0009825);; Biological Process: plant-type cell wall biogenesis (GO:0009832);; Biological Process: trichome branching (GO:0010091);; Molecular Function: nucleoside-triphosphatase activity (GO:0017111);; Biological Process: cortical microtubule organization (GO:0043622);;	K07767|0|osa:4324404|Os01g0683100; K07767 katanin p60 ATPase-containing subunit A1 [EC:3.6.4.3] (A)	--	[O]	Posttranslational modification, protein turnover, chaperones	ATPase family associated with various cellular activities (AAA);; Vps4 C terminal oligomerisation domain;; Holliday junction DNA helicase ruvB N-terminus	Katanin p60 ATPase-containing subunit A1 {ECO:0000255|HAMAP-Rule:MF_03023} GN=At1g80350 OS=Arabidopsis thaliana (Mouse-ear cress) PE=1 SV=1	O	Posttranslational modification, protein turnover, chaperones	hypothetical protein OsI_03290 [Oryza sativa Indica Group]
PB.478.1	LOC_Os01g49026.1	--	--	Biological Process: cellulose biosynthetic process (GO:0030244);; Biological Process: Golgi vesicle transport (GO:0048193);;	--	--	[S]	Function unknown	Rab5-interacting protein (Rab5ip)	--	S	Function unknown	PREDICTED: ER membrane protein complex subunit 6-like [Oryza brachyantha]
PB.479.1	PB.479.1	--	--	Cellular Component: membrane (GO:0016020);;	--	--	--	--	Protein of unknown function, DUF599	--	S	Function unknown	hypothetical protein OsJ_03034 [Oryza sativa Japonica Group]
PB.480.1	PB.480.1	--	--	Molecular Function: protein prenyltransferase activity (GO:0008318);; Cellular Component: plastid (GO:0009536);; Biological Process: protein prenylation (GO:0018342);;	K14137|0|osa:4324142|Os01g0684200; K14137 protein prenyltransferase alpha subunit repeat containing protein 1 (A)	--	--	--	Protein prenyltransferase alpha subunit repeat;; Protein prenyltransferase alpha subunit repeat	--	O	Posttranslational modification, protein turnover, chaperones	hypothetical protein OsJ_03035 [Oryza sativa Japonica Group]
PB.481.1	PB.481.1	--	--	Molecular Function: protein prenyltransferase activity (GO:0008318);; Cellular Component: plastid (GO:0009536);; Biological Process: protein prenylation (GO:0018342);;	K14137|0|osa:4324142|Os01g0684200; K14137 protein prenyltransferase alpha subunit repeat containing protein 1 (A)	--	[O]	Posttranslational modification, protein turnover, chaperones	Protein prenyltransferase alpha subunit repeat	--	O	Posttranslational modification, protein turnover, chaperones	Os01g0684200 [Oryza sativa Japonica Group]
PB.482.1	LOC_Os01g49190.1	[C]	Energy production and conversion	Molecular Function: copper ion binding (GO:0005507);; Molecular Function: ATP binding (GO:0005524);; Cellular Component: nucleolus (GO:0005730);; Cellular Component: mitochondrial respiratory chain complex I (GO:0005747);; Cellular Component: mitochondrial proton-transporting ATP synthase, catalytic core (GO:0005754);; Cellular Component: plasma membrane (GO:0005886);; Biological Process: ATP cat…	K02133|0|sita:101763014|uncharacterized LOC101763014; K02133 F-type H+-transporting ATPase subunit beta [EC:3.6.3.14] (A)	ko00190:Oxidative phosphorylation	[C]	Energy production and conversion	ATP synthase alpha/beta family, nucleotide-binding domain;; ATP synthase alpha/beta chain, C terminal domain;; ATP synthase alpha/beta family, beta-barrel domain;; ATP synthase F1 beta subunit	ATP synthase subunit beta, mitochondrial (Precursor) OS=Oryza sativa subsp. japonica (Rice) PE=1 SV=2	C	Energy production and conversion	PREDICTED: uncharacterized protein LOC101763014 [Setaria italica]
PB.482.2	LOC_Os01g49190.1	[C]	Energy production and conversion	Molecular Function: copper ion binding (GO:0005507);; Molecular Function: ATP binding (GO:0005524);; Cellular Component: nucleolus (GO:0005730);; Cellular Component: mitochondrial respiratory chain complex I (GO:0005747);; Cellular Component: mitochondrial proton-transporting ATP synthase, catalytic core (GO:0005754);; Cellular Component: plasma membrane (GO:0005886);; Biological Process: ATP cat…	K02133|0|sita:101763014|uncharacterized LOC101763014; K02133 F-type H+-transporting ATPase subunit beta [EC:3.6.3.14] (A)	ko00190:Oxidative phosphorylation	[C]	Energy production and conversion	ATP synthase alpha/beta family, nucleotide-binding domain;; ATP synthase alpha/beta chain, C terminal domain;; ATP synthase alpha/beta family, beta-barrel domain;; ATP synthase F1 beta subunit	ATP synthase subunit beta, mitochondrial (Precursor) OS=Oryza sativa subsp. japonica (Rice) PE=1 SV=2	C	Energy production and conversion	PREDICTED: uncharacterized protein LOC101763014 [Setaria italica]
PB.483.1	LOC_Os01g49200.1	--	--	Biological Process: nuclear division (GO:0000280);; Biological Process: cytokinesis by cell plate formation (GO:0000911);; Cellular Component: nucleus (GO:0005634);; Cellular Component: vacuole (GO:0005773);; Cellular Component: spindle (GO:0005819);; Molecular Function: microtubule binding (GO:0008017);; Cellular Component: phragmoplast (GO:0009524);; Cellular Component: preprophase band (GO:000…	K16732|0|osa:4324106|Os01g0685900; K16732 protein regulator of cytokinesis 1 (A)	--	[DZ]	--	Microtubule associated protein (MAP65/ASE1 family)	65-kDa microtubule-associated protein 3 GN=K17N15.15 OS=Arabidopsis thaliana (Mouse-ear cress) PE=1 SV=1	S	Function unknown	Os01g0685900 [Oryza sativa Japonica Group]
PB.484.1	PB.484.1	--	--	--	--	--	--	--	--	--	--	--	hypothetical protein OsJ_03047 [Oryza sativa Japonica Group]
PB.485.1	LOC_Os01g49290.1	[R]	General function prediction only	Molecular Function: signal transducer activity (GO:0004871);; Molecular Function: protein binding (GO:0005515);; Cellular Component: nucleolus (GO:0005730);; Cellular Component: plasma membrane (GO:0005886);; Biological Process: signal transduction (GO:0007165);; Cellular Component: chloroplast (GO:0009507);; Cellular Component: cytosolic ribosome (GO:0022626);; Biological Process: response to ca…	K14753|0|osa:4324115|Os01g0686800; K14753 guanine nucleotide-binding protein subunit beta-2-like 1 protein (A)	--	[T]	Signal transduction mechanisms	WD domain, G-beta repeat;; Nucleoporin Nup120/160	Guanine nucleotide-binding protein subunit beta-like protein A GN=RACK1A OS=Oryza sativa subsp. japonica (Rice) PE=1 SV=1	S	Function unknown	Os01g0686800 [Oryza sativa Japonica Group]
PB.486.1	LOC_Os01g49310.1	--	--	--	--	--	--	--	--	--	S	Function unknown	Os01g0687300 [Oryza sativa Japonica Group]
PB.487.1	PB.487.1	[J]	Translation, ribosomal structure and biogenesis	--	K00604|1.77305e-172|osa:4324118|Os01g0687500; K00604 methionyl-tRNA formyltransferase [EC:2.1.2.9] (A)	ko00670:One carbon pool by folate;ko00970:Aminoacyl-tRNA biosynthesis	[J]	Translation, ribosomal structure and biogenesis	Formyl transferase	Formyltetrahydrofolate deformylase 1, mitochondrial (Precursor) GN=PURU1 OS=Arabidopsis thaliana (Mouse-ear cress) PE=1 SV=1	J	Translation, ribosomal structure and biogenesis	hypothetical protein OsI_03318 [Oryza sativa Indica Group]
PB.489.1	LOC_Os01g49440.1	--	--	Cellular Component: plastid (GO:0009536);;	--	--	--	--	Protein of unknown function (DUF1639)	--	S	Function unknown	Os01g0689000 [Oryza sativa Japonica Group]
PB.490.1	LOC_Os01g49680.1	[KL]	--	Cellular Component: core TFIIH complex (GO:0000439);; Molecular Function: DNA binding (GO:0003677);; Molecular Function: ATP-dependent DNA helicase activity (GO:0004003);; Molecular Function: ATP binding (GO:0005524);; Cellular Component: cytoplasm (GO:0005737);; Biological Process: nucleotide-excision repair (GO:0006289);; Biological Process: response to toxic substance (GO:0009636);; Biological…	K10843|0|obr:102716825|DNA repair helicase XPB1-like; K10843 DNA excision repair protein ERCC-3 [EC:3.6.4.12] (A)	ko03022:Basal transcription factors;ko03420:Nucleotide excision repair	[KL]	--	Helicase conserved C-terminal domain;; Type III restriction enzyme, res subunit;; Helicase conserved C-terminal domain;; SNF2 family N-terminal domain;; DEAD/DEAH box helicase	DNA repair helicase XPB2 GN=XPB2 OS=Arabidopsis thaliana (Mouse-ear cress) PE=2 SV=1	L	Replication, recombination and repair	hypothetical protein OsJ_03086 [Oryza sativa Japonica Group]
PB.491.1	LOC_Os01g49690.1	[T]	Signal transduction mechanisms	Molecular Function: protein serine/threonine phosphatase activity (GO:0004722);; Cellular Component: nucleus (GO:0005634);; Cellular Component: cytoplasm (GO:0005737);; Biological Process: protein dephosphorylation (GO:0006470);; Cellular Component: protein serine/threonine phosphatase complex (GO:0008287);; Biological Process: negative regulation of flower development (GO:0009910);;	K15498|0|osa:4325641|Os01g0691700; K15498 serine/threonine-protein phosphatase 6 catalytic subunit [EC:3.1.3.16] (A)	--	[DT]	--	Calcineurin-like phosphoesterase	Phytochrome-associated serine/threonine-protein phosphatase GN=FYPP OS=Pisum sativum (Garden pea) PE=1 SV=1	T	Signal transduction mechanisms	Os01g0691700 [Oryza sativa Japonica Group]
PB.492.1	LOC_Os01g49760.1	--	--	Molecular Function: serine-type endopeptidase activity (GO:0004252);; Biological Process: proteolysis (GO:0006508);; Cellular Component: chloroplast (GO:0009507);;	--	--	--	--	Alpha/beta hydrolase family;; Alpha/beta hydrolase family;; alpha/beta hydrolase fold	--	S	Function unknown	Os01g0692600 [Oryza sativa Japonica Group]
PB.493.1	PB.493.1	--	--	--	--	--	[TU]	--	ANTH domain;; ENTH domain	Putative clathrin assembly protein At2g01600 GN=At2g01600 OS=Arabidopsis thaliana (Mouse-ear cress) PE=2 SV=2	U	Intracellular trafficking, secretion, and vesicular transport	Os01g0694900 [Oryza sativa Japonica Group]
PB.493.2	LOC_Os01g50010.1	--	--	Molecular Function: 1-phosphatidylinositol binding (GO:0005545);; Cellular Component: clathrin coat (GO:0030118);; Molecular Function: clathrin binding (GO:0030276);; Biological Process: clathrin coat assembly (GO:0048268);;	--	--	[TU]	--	ANTH domain;; ENTH domain	Putative clathrin assembly protein At2g01600 GN=At2g01600 OS=Arabidopsis thaliana (Mouse-ear cress) PE=2 SV=2	U	Intracellular trafficking, secretion, and vesicular transport	Os01g0694900 [Oryza sativa Japonica Group]
PB.494.1	LOC_Os01g50030.1	[QR]	--	Molecular Function: phosphoethanolamine N-methyltransferase activity (GO:0000234);; Biological Process: phosphatidylcholine biosynthetic process (GO:0006656);; Biological Process: pollen development (GO:0009555);; Biological Process: pollen tube growth (GO:0009860);; Biological Process: pollen tube guidance (GO:0010183);; Biological Process: methylation (GO:0032259);; Biological Process: choline …	K05929|0|obr:102712945|phosphoethanolamine N-methyltransferase 1-like; K05929 phosphoethanolamine N-methyltransferase [EC:2.1.1.103] (A)	ko00564:Glycerophospholipid metabolism	[IR]	--	Methyltransferase domain;; Methyltransferase domain;; Methyltransferase domain;; Methyltransferase domain;; Methyltransferase domain;; Methyltransferase domain;; ubiE/COQ5 methyltransferase family;; Mycolic acid cyclopropane synthetase;; AdoMet dependent proline di-methyltransferase;; Tellurite resistance protein TehB;; Methyltransferase domain;; CheR methyltransferase, SAM binding domain;; Methy…	Phosphoethanolamine N-methyltransferase 1 GN=MEB5.22 OS=Arabidopsis thaliana (Mouse-ear cress) PE=1 SV=1	S	Function unknown	Os01g0695100 [Oryza sativa Japonica Group]
PB.495.1	PB.495.1	--	--	--	--	--	--	--	--	--	S	Function unknown	hypothetical protein OsI_03380 [Oryza sativa Indica Group]
PB.496.1	LOC_Os01g50160.1	[V]	Defense mechanisms	Molecular Function: ATP binding (GO:0005524);; Biological Process: ATP catabolic process (GO:0006200);; Cellular Component: integral component of membrane (GO:0016021);; Molecular Function: ATPase activity, coupled to transmembrane movement of substances (GO:0042626);; Biological Process: transmembrane transport (GO:0055085);;	K05658|0|obr:102720647|ABC transporter B family member 4-like; K05658 ATP-binding cassette, subfamily B (MDR/TAP), member 1 [EC:3.6.3.44] (A)	ko02010:ABC transporters	[Q]	Secondary metabolites biosynthesis, transport and catabolism	ABC transporter transmembrane region;; ABC transporter;; AAA domain;; Predicted ATPase of the ABC class;; RecF/RecN/SMC N terminal domain;; P-loop containing region of AAA domain;; AAA domain;; AAA domain;; AAA ATPase domain;; Domain of unknown function DUF87;; Protein of unknown function, DUF258	ABC transporter B family member 11 GN=T14P4.15 OS=Arabidopsis thaliana (Mouse-ear cress) PE=2 SV=1	V	Defense mechanisms	MDR-like ABC transporter [Oryza sativa Japonica Group]
PB.497.1	PB.497.1	--	--	--	--	--	[O]	Posttranslational modification, protein turnover, chaperones	Xylanase inhibitor C-terminal;; Xylanase inhibitor N-terminal;; Eukaryotic aspartyl protease	Aspartic proteinase nepenthesin-1 (Precursor) GN=nep1 OS=Nepenthes gracilis (Slender pitcher plant) PE=1 SV=1	O	Posttranslational modification, protein turnover, chaperones	hypothetical protein OsI_03384 [Oryza sativa Indica Group]
PB.498.1	LOC_Os01g50320.1	--	--	Molecular Function: RNA binding (GO:0003723);; Cellular Component: mitochondrion (GO:0005739);; Biological Process: RNA processing (GO:0006396);;	--	--	[A]	RNA processing and modification	Alternative splicing regulator;; Surp module	Probable splicing factor 3A subunit 1 GN=At1g14650 OS=Arabidopsis thaliana (Mouse-ear cress) PE=1 SV=2	A	RNA processing and modification	Os01g0698100 [Oryza sativa Japonica Group]
PB.499.1	PB.499.1	--	--	--	--	--	[L]	Replication, recombination and repair	Domain of unknown function (DUF4413);; hAT family C-terminal dimerisation region;; BED zinc finger	Zinc finger BED domain-containing protein RICESLEEPER 1 OS=Oryza sativa subsp. japonica (Rice) PE=3 SV=1	S	Function unknown	Os01g0698300 [Oryza sativa Japonica Group]
PB.500.1	LOC_Os01g50370.1	[RTKL]	--	Molecular Function: protein serine/threonine kinase activity (GO:0004674);; Molecular Function: ATP binding (GO:0005524);; Cellular Component: mitochondrion (GO:0005739);; Biological Process: protein phosphorylation (GO:0006468);;	--	--	[T]	Signal transduction mechanisms	Protein kinase domain;; Protein tyrosine kinase;; Kinase-like	Mitogen-activated protein kinase kinase kinase NPK1 GN=NPK1 OS=Nicotiana tabacum (Common tobacco) PE=1 SV=1	T	Signal transduction mechanisms	NPKL1 [Oryza sativa Japonica Group]
PB.501.1	LOC_Os01g50400.1	[RTKL]	--	Molecular Function: protein serine/threonine kinase activity (GO:0004674);; Molecular Function: ATP binding (GO:0005524);; Cellular Component: mitochondrion (GO:0005739);; Biological Process: protein phosphorylation (GO:0006468);;	--	--	[T]	Signal transduction mechanisms	Protein kinase domain;; Protein tyrosine kinase;; Phosphotransferase enzyme family;; Kinase-like	Mitogen-activated protein kinase kinase kinase 2 GN=ANP2 OS=Arabidopsis thaliana (Mouse-ear cress) PE=2 SV=1	T	Signal transduction mechanisms	hypothetical protein OsJ_03139 [Oryza sativa Japonica Group]
PB.502.1	LOC_Os01g50450.1	--	--	--	--	--	--	--	--	--	S	Function unknown	Os01g0700000 [Oryza sativa Japonica Group]
PB.503.1	PB.503.1	--	--	--	K15382|6.65852e-118|osa:4326923|Os01g0700100; K15382 solute carrier family 50 (sugar transporter) (A)	--	[R]	General function prediction only	Sugar efflux transporter for intercellular exchange	Bidirectional sugar transporter SWEET2b OS=Oryza sativa subsp. japonica (Rice) PE=2 SV=1	U	Intracellular trafficking, secretion, and vesicular transport	Os01g0700100 [Oryza sativa Japonica Group]
PB.504.1	LOC_Os01g50750.1	--	--	Molecular Function: zinc ion binding (GO:0008270);; Cellular Component: membrane (GO:0016020);;	--	--	[O]	Posttranslational modification, protein turnover, chaperones	Ring finger domain;; RING-H2 zinc finger;; Zinc finger, C3HC4 type (RING finger);; Zinc finger, C3HC4 type (RING finger);; Zinc finger, C3HC4 type (RING finger)	E3 ubiquitin-protein ligase At4g11680 GN=At4g11680 OS=Arabidopsis thaliana (Mouse-ear cress) PE=2 SV=1	O	Posttranslational modification, protein turnover, chaperones	RING zinc finger protein-like [Oryza sativa Japonica Group]
PB.505.1	LOC_Os01g50760.1	[H]	Coenzyme transport and metabolism	Molecular Function: dimethylallyltranstransferase activity (GO:0004161);; Molecular Function: geranyltranstransferase activity (GO:0004337);; Cellular Component: cytoplasm (GO:0005737);; Biological Process: cholesterol biosynthetic process (GO:0006695);; Biological Process: geranyl diphosphate biosynthetic process (GO:0033384);; Biological Process: farnesyl diphosphate biosynthetic process (GO:00…	K00787|0|osa:4324245|Os01g0703400; K00787 farnesyl diphosphate synthase [EC:2.5.1.1 2.5.1.10] (A)	ko00900:Terpenoid backbone biosynthesis	[H]	Coenzyme transport and metabolism	Polyprenyl synthetase	Farnesyl pyrophosphate synthase GN=FPS OS=Zea mays (Maize) PE=2 SV=1	H	Coenzyme transport and metabolism	Os01g0703400 [Oryza sativa Japonica Group]
PB.505.2	LOC_Os01g50760.1	[H]	Coenzyme transport and metabolism	Molecular Function: dimethylallyltranstransferase activity (GO:0004161);; Molecular Function: geranyltranstransferase activity (GO:0004337);; Cellular Component: cytoplasm (GO:0005737);; Biological Process: cholesterol biosynthetic process (GO:0006695);; Biological Process: geranyl diphosphate biosynthetic process (GO:0033384);; Biological Process: farnesyl diphosphate biosynthetic process (GO:00…	K00787|0|osa:4324245|Os01g0703400; K00787 farnesyl diphosphate synthase [EC:2.5.1.1 2.5.1.10] (A)	ko00900:Terpenoid backbone biosynthesis	[H]	Coenzyme transport and metabolism	Polyprenyl synthetase	Farnesyl pyrophosphate synthase GN=FPS OS=Zea mays (Maize) PE=2 SV=1	H	Coenzyme transport and metabolism	Os01g0703400 [Oryza sativa Japonica Group]
PB.506.1	LOC_Os01g50770.1	--	--	Biological Process: intracellular protein transport (GO:0006886);; Biological Process: vesicle-mediated transport (GO:0016192);; Cellular Component: clathrin adaptor complex (GO:0030131);;	K12393|0|osa:4324247|Os01g0703600; K12393 AP-1 complex subunit mu (A)	--	[U]	Intracellular trafficking, secretion, and vesicular transport	Adaptor complexes medium subunit family;; Clathrin adaptor complex small chain	AP-1 complex subunit mu-2 GN=F8A5.29 OS=Arabidopsis thaliana (Mouse-ear cress) PE=1 SV=1	U	Intracellular trafficking, secretion, and vesicular transport	Os01g0703600 [Oryza sativa Japonica Group]
PB.507.1	LOC_Os01g50820.1	[P]	Inorganic ion transport and metabolism	Cellular Component: plasma membrane (GO:0005886);; Molecular Function: nitrate transmembrane transporter activity (GO:0015112);; Biological Process: nitrate transport (GO:0015706);; Cellular Component: integral component of membrane (GO:0016021);; Biological Process: transmembrane transport (GO:0055085);;	K02575|0|obr:102701393|high affinity nitrate transporter 2.5-like; K02575 MFS transporter, NNP family, nitrate/nitrite transporter (A)	ko00910:Nitrogen metabolism	--	--	Major Facilitator Superfamily	High-affinity nitrate transporter 2.3 OS=Oryza sativa subsp. japonica (Rice) PE=1 SV=1	P	Inorganic ion transport and metabolism	RecName: Full=High-affinity nitrate transporter 2.3; Short=OsNRT2.3 [Oryza sativa Japonica Group]
PB.508.1	LOC_Os01g50934.1	--	--	Cellular Component: mitochondrion (GO:0005739);; Cellular Component: membrane (GO:0016020);; Cellular Component: cytoplasmic membrane-bounded vesicle (GO:0016023);;	--	--	--	--	--	--	S	Function unknown	Os01g0705500 [Oryza sativa Japonica Group]
PB.509.1	LOC_Os01g50940.1	--	--	Biological Process: response to stress (GO:0006950);; Biological Process: signal transduction (GO:0007165);; Biological Process: response to abscisic acid (GO:0009737);; Molecular Function: protein dimerization activity (GO:0046983);; Biological Process: cellular response to organic substance (GO:0071310);; Biological Process: cellular response to oxygen-containing compound (GO:1901701);;	--	--	--	--	bHLH-MYC and R2R3-MYB transcription factors N-terminal;; Helix-loop-helix DNA-binding domain	Transcription factor ABA-INDUCIBLE bHLH-TYPE GN=F13A10.4 OS=Arabidopsis thaliana (Mouse-ear cress) PE=2 SV=2	K	Transcription	hypothetical protein OsJ_03182 [Oryza sativa Japonica Group]
PB.511.1	LOC_Os01g51010.1	--	--	Cellular Component: plastid (GO:0009536);;	--	--	[Z]	Cytoskeleton	Regulator of Vps4 activity in the MVB pathway	--	S	Function unknown	Os01g0706400 [Oryza sativa Japonica Group]
PB.512.1	LOC_Os01g51020.1	--	--	Molecular Function: structural constituent of ribosome (GO:0003735);; Cellular Component: cell wall (GO:0005618);; Cellular Component: plasma membrane (GO:0005886);; Biological Process: translation (GO:0006412);; Cellular Component: chloroplast (GO:0009507);; Cellular Component: cytosolic large ribosomal subunit (GO:0022625);;	K02903|2.64655e-101|osa:4327674|Os01g0706500; K02903 large subunit ribosomal protein L28e (A)	ko03010:Ribosome	[J]	Translation, ribosomal structure and biogenesis	Ribosomal L28e protein family	60S ribosomal protein L28-1 GN=RPL28A OS=Arabidopsis thaliana (Mouse-ear cress) PE=2 SV=1	J	Translation, ribosomal structure and biogenesis	Os01g0706500 [Oryza sativa Japonica Group]
PB.514.1	LOC_Os01g51120.1	--	--	Cellular Component: plasma membrane (GO:0005886);; Biological Process: protein targeting to vacuole (GO:0006623);; Biological Process: membrane fusion (GO:0006944);; Biological Process: vesicle-mediated transport (GO:0016192);;	K08493|2.19678e-143|osa:4327678|Os01g0707300; K08493 vesicle transport through interaction with t-SNAREs 1 (A)	ko04130:SNARE interactions in vesicular transport	[U]	Intracellular trafficking, secretion, and vesicular transport	Vesicle transport v-SNARE protein N-terminus;; Snare region anchored in the vesicle membrane C-terminus	Vesicle transport v-SNARE 13 GN=VTI13 OS=Arabidopsis thaliana (Mouse-ear cress) PE=2 SV=1	U	Intracellular trafficking, secretion, and vesicular transport	Os01g0707300 [Oryza sativa Japonica Group]
PB.515.1	LOC_Os01g51154.2	--	--	Cellular Component: nucleosome (GO:0000786);; Molecular Function: DNA binding (GO:0003677);; Molecular Function: chromatin binding (GO:0003682);; Cellular Component: nucleus (GO:0005634);; Biological Process: nucleosome assembly (GO:0006334);; Cellular Component: plastid (GO:0009536);;	K09422|1.55164e-160|osa:4327680|Os01g0708000; K09422 myb proto-oncogene protein, plant (A)	--	--	--	Myb-like DNA-binding domain;; Myb-like DNA-binding domain;; linker histone H1 and H5 family	Single myb histone 3 GN=SMH3 OS=Zea mays (Maize) PE=2 SV=1	B	Chromatin structure and dynamics	Os01g0708000 [Oryza sativa Japonica Group]
PB.515.2	PB.515.2	--	--	Cellular Component: nucleosome (GO:0000786);; Molecular Function: DNA binding (GO:0003677);; Molecular Function: chromatin binding (GO:0003682);; Cellular Component: nucleus (GO:0005634);; Biological Process: nucleosome assembly (GO:0006334);; Cellular Component: plastid (GO:0009536);;	K09422|6.64712e-75|osa:4327680|Os01g0708000; K09422 myb proto-oncogene protein, plant (A)	--	--	--	Myb-like DNA-binding domain;; Myb-like DNA-binding domain	Single myb histone 4 GN=SMH4 OS=Zea mays (Maize) PE=2 SV=1	B	Chromatin structure and dynamics	hypothetical protein OsI_03454 [Oryza sativa Indica Group]
PB.516.1	LOC_Os01g51170.1	[I]	Lipid transport and metabolism	Cellular Component: nucleosome (GO:0000786);; Molecular Function: DNA binding (GO:0003677);; Molecular Function: chromatin binding (GO:0003682);; Molecular Function: glycylpeptide N-tetradecanoyltransferase activity (GO:0004379);; Cellular Component: nucleus (GO:0005634);; Cellular Component: cytosol (GO:0005829);; Cellular Component: ribosome (GO:0005840);; Biological Process: nucleosome assembl…	K00671|0|osa:4327681|Os01g0708100; K00671 glycylpeptide N-tetradecanoyltransferase [EC:2.3.1.97] (A)	--	[I]	Lipid transport and metabolism	Myristoyl-CoA:protein N-myristoyltransferase, C-terminal domain;; Myristoyl-CoA:protein N-myristoyltransferase, N-terminal domain	Glycylpeptide N-tetradecanoyltransferase 1 GN=NMT1 OS=Arabidopsis thaliana (Mouse-ear cress) PE=1 SV=2	I	Lipid transport and metabolism	Os01g0708100 [Oryza sativa Japonica Group]
PB.516.2	LOC_Os01g51170.1	[I]	Lipid transport and metabolism	Cellular Component: nucleosome (GO:0000786);; Molecular Function: DNA binding (GO:0003677);; Molecular Function: chromatin binding (GO:0003682);; Molecular Function: glycylpeptide N-tetradecanoyltransferase activity (GO:0004379);; Cellular Component: nucleus (GO:0005634);; Cellular Component: cytosol (GO:0005829);; Cellular Component: ribosome (GO:0005840);; Biological Process: nucleosome assembl…	K00671|0|osa:4327681|Os01g0708100; K00671 glycylpeptide N-tetradecanoyltransferase [EC:2.3.1.97] (A)	--	[I]	Lipid transport and metabolism	Myristoyl-CoA:protein N-myristoyltransferase, C-terminal domain;; Myristoyl-CoA:protein N-myristoyltransferase, N-terminal domain	Glycylpeptide N-tetradecanoyltransferase 1 GN=NMT1 OS=Arabidopsis thaliana (Mouse-ear cress) PE=1 SV=2	I	Lipid transport and metabolism	Os01g0708100 [Oryza sativa Japonica Group]
PB.517.1	LOC_Os01g51190.1	--	--	Molecular Function: magnesium ion transmembrane transporter activity (GO:0015095);; Biological Process: magnesium ion transport (GO:0015693);; Cellular Component: membrane (GO:0016020);;	--	--	--	--	Magnesium transporter NIPA;; EamA-like transporter family	Probable magnesium transporter NIPA9 GN=At5g11960 OS=Arabidopsis thaliana (Mouse-ear cress) PE=2 SV=1	S	Function unknown	PREDICTED: NIPA-like protein 2-like [Oryza brachyantha]
PB.518.1	LOC_Os01g51200.1	[RTKL]	--	Molecular Function: protein serine/threonine kinase activity (GO:0004674);; Molecular Function: ATP binding (GO:0005524);; Cellular Component: nucleus (GO:0005634);; Cellular Component: cytoplasm (GO:0005737);; Cellular Component: plasma membrane (GO:0005886);; Biological Process: protein phosphorylation (GO:0006468);; Cellular Component: plasmodesma (GO:0009506);;	K02218|0|obr:102705112|casein kinase I isoform delta-like; K02218 casein kinase 1 [EC:2.7.11.1] (A)	--	[T]	Signal transduction mechanisms	Protein kinase domain;; Protein tyrosine kinase;; Phosphotransferase enzyme family	Casein kinase I isoform delta-like GN=At4g26100 OS=Arabidopsis thaliana (Mouse-ear cress) PE=2 SV=2	T	Signal transduction mechanisms	Chain A, Crystal Structure Of Casein Kinase-1 Like Protein In Plant
PB.519.1	LOC_Os01g51220.1	[U]	Intracellular trafficking, secretion, and vesicular transport	Biological Process: ER to Golgi vesicle-mediated transport (GO:0006888);; Biological Process: cellulose biosynthetic process (GO:0030244);;	--	--	[U]	Intracellular trafficking, secretion, and vesicular transport	Transport protein particle (TRAPP) component	--	U	Intracellular trafficking, secretion, and vesicular transport	Os01g0708600 [Oryza sativa Japonica Group]
PB.520.1	LOC_Os01g51280.1	[R]	General function prediction only	Molecular Function: acid phosphatase activity (GO:0003993);; Cellular Component: plastid (GO:0009536);;	K03787|0|osa:4327823|Os01g0709400; K03787 5'-nucleotidase [EC:3.1.3.5] (A)	ko00230:Purine metabolism;ko00240:Pyrimidine metabolism;ko00760:Nicotinate and nicotinamide metabolism	--	--	Survival protein SurE	--	F	Nucleotide transport and metabolism	Os01g0709400 [Oryza sativa Japonica Group]
PB.521.1	LOC_Os01g51300.1	[R]	General function prediction only	Cellular Component: nucleolus (GO:0005730);; Cellular Component: cytoplasm (GO:0005737);; Biological Process: unidimensional cell growth (GO:0009826);; Biological Process: flower development (GO:0009908);; Biological Process: leaf morphogenesis (GO:0009965);; Biological Process: trichome morphogenesis (GO:0010090);; Molecular Function: metal ion binding (GO:0046872);;	K10752|0|osa:4327826|Os01g0710000; K10752 histone-binding protein RBBP4 (A)	--	[B]	Chromatin structure and dynamics	WD domain, G-beta repeat;; Histone-binding protein RBBP4 or subunit C of CAF1 complex	WD-40 repeat-containing protein MSI4 GN=F3P11.12 OS=Arabidopsis thaliana (Mouse-ear cress) PE=1 SV=3	S	Function unknown	hypothetical protein OsJ_03210 [Oryza sativa Japonica Group]
PB.522.1	LOC_Os01g51380.2	[C]	Energy production and conversion	Molecular Function: ATP binding (GO:0005524);; Biological Process: ATP biosynthetic process (GO:0006754);; Biological Process: ATP hydrolysis coupled proton transport (GO:0015991);; Molecular Function: hydrolase activity, acting on acid anhydrides, catalyzing transmembrane movement of substances (GO:0016820);; Cellular Component: proton-transporting V-type ATPase, V1 domain (GO:0033180);;	K02147|0|osa:4327833|Os01g0711000; K02147 V-type H+-transporting ATPase subunit B (A)	ko00190:Oxidative phosphorylation;ko04145:Phagosome	[C]	Energy production and conversion	ATP synthase alpha/beta family, nucleotide-binding domain;; ATP synthase alpha/beta chain, C terminal domain;; ATP synthase alpha/beta family, beta-barrel domain	V-type proton ATPase subunit B2 GN=VHA-B2 OS=Arabidopsis thaliana (Mouse-ear cress) PE=1 SV=1	C	Energy production and conversion	Os01g0711000 [Oryza sativa Japonica Group]
PB.523.1	LOC_Os01g51390.1	[R]	General function prediction only	Molecular Function: metalloendopeptidase activity (GO:0004222);; Cellular Component: mitochondrion (GO:0005739);; Biological Process: proteolysis (GO:0006508);; Molecular Function: metal ion binding (GO:0046872);;	K17732|0|bdi:100844576|probable mitochondrial-processing peptidase subunit beta; K17732 mitochondrial-processing peptidase subunit beta [EC:3.4.24.64] (A)	--	[O]	Posttranslational modification, protein turnover, chaperones	Insulinase (Peptidase family M16);; Peptidase M16 inactive domain	Probable mitochondrial-processing peptidase subunit beta (Precursor) GN=At3g02090 OS=Arabidopsis thaliana (Mouse-ear cress) PE=2 SV=2	O	Posttranslational modification, protein turnover, chaperones	hypothetical protein OsJ_03216 [Oryza sativa Japonica Group]
PB.524.1	LOC_Os01g51400.1	[RTKL]	--	Molecular Function: protein serine/threonine kinase activity (GO:0004674);; Molecular Function: protein tyrosine kinase activity (GO:0004713);; Molecular Function: ATP binding (GO:0005524);; Biological Process: protein phosphorylation (GO:0006468);; Cellular Component: integral component of membrane (GO:0016021);; Cellular Component: cytoplasmic membrane-bounded vesicle (GO:0016023);;	--	--	--	--	Protein tyrosine kinase;; Protein kinase domain;; Leucine rich repeat;; Leucine Rich repeats (2 copies);; Leucine Rich Repeat;; Leucine rich repeat N-terminal domain;; Leucine rich repeat	Probable leucine-rich repeat receptor-like protein kinase At1g68400 (Precursor) GN=At1g68400 OS=Arabidopsis thaliana (Mouse-ear cress) PE=2 SV=1	S	Function unknown	Os01g0711200 [Oryza sativa Japonica Group]
PB.525.1	PB.525.1	[E]	Amino acid transport and metabolism	Molecular Function: glycine dehydrogenase (decarboxylating) activity (GO:0004375);; Molecular Function: ATP binding (GO:0005524);; Cellular Component: mitochondrion (GO:0005739);; Biological Process: glycine catabolic process (GO:0006546);; Cellular Component: chloroplast envelope (GO:0009941);; Molecular Function: pyridoxal phosphate binding (GO:0030170);; Biological Process: response to cadmium…	K00281|0|osa:4325932|Os01g0711400; K00281 glycine dehydrogenase [EC:1.4.4.2] (A)	ko00260:Glycine, serine and threonine metabolism;ko01200:Carbon metabolism	[E]	Amino acid transport and metabolism	Glycine cleavage system P-protein;; Beta-eliminating lyase;; Aminotransferase class-V	Glycine dehydrogenase (decarboxylating), mitochondrial (Precursor) GN=GDCSP OS=Solanum tuberosum (Potato) PE=2 SV=1	E	Amino acid transport and metabolism	Os01g0711400 [Oryza sativa Japonica Group]
PB.526.1	LOC_Os01g51570.1	--	--	Cellular Component: cell wall (GO:0005618);; Cellular Component: vacuole (GO:0005773);; Cellular Component: plasma membrane (GO:0005886);; Biological Process: carbohydrate metabolic process (GO:0005975);; Biological Process: response to cold (GO:0009409);; Biological Process: response to bacterium (GO:0009617);; Biological Process: response to salt stress (GO:0009651);; Biological Process: defens…	--	--	--	--	Glycosyl hydrolases family 17	Glucan endo-1,3-beta-glucosidase GII (Precursor) OS=Hordeum vulgare (Barley) PE=1 SV=1	--	--	Os01g0713200 [Oryza sativa Japonica Group]
PB.527.1	LOC_Os01g51670.1	--	--	Cellular Component: membrane (GO:0016020);;	--	--	--	--	--	--	S	Function unknown	Os01g0714600 [Oryza sativa Japonica Group]
PB.528.1	PB.528.1	--	--	Biological Process: metabolic process (GO:0008152);; Cellular Component: cytoplasmic membrane-bounded vesicle (GO:0016023);; Molecular Function: pyridoxal phosphate binding (GO:0030170);; Molecular Function: alliin lyase activity (GO:0047654);;	--	--	--	--	Allinase;; Alliinase EGF-like domain;; Allinase	Tryptophan aminotransferase-related protein 3 GN=TAR3 OS=Arabidopsis thaliana (Mouse-ear cress) PE=3 SV=1	S	Function unknown	hypothetical protein OsI_03520 [Oryza sativa Indica Group]
PB.529.1	LOC_Os01g52100.1	--	--	--	--	--	--	--	Protein of unknown function (DUF581)	--	S	Function unknown	Os01g0719000 [Oryza sativa Japonica Group]
PB.530.1	LOC_Os01g52160.1	--	--	Cellular Component: cytoplasmic membrane-bounded vesicle (GO:0016023);; Biological Process: metal ion transport (GO:0030001);; Molecular Function: metal ion binding (GO:0046872);;	--	--	[P]	Inorganic ion transport and metabolism	Heavy-metal-associated domain	Copper transport protein ATX1 GN=ATX1 OS=Arabidopsis thaliana (Mouse-ear cress) PE=1 SV=1	S	Function unknown	Os01g0719600 [Oryza sativa Japonica Group]
PB.531.1	LOC_Os01g52240.1	--	--	Cellular Component: mitochondrion (GO:0005739);; Cellular Component: photosystem I (GO:0009522);; Cellular Component: photosystem II (GO:0009523);; Cellular Component: chloroplast thylakoid membrane (GO:0009535);; Biological Process: response to blue light (GO:0009637);; Biological Process: photosynthesis, light harvesting (GO:0009765);; Cellular Component: chloroplast envelope (GO:0009941);; Bio…	K08912|7.71623e-168|osa:4324705|Os01g0720500; K08912 light-harvesting complex II chlorophyll a/b binding protein 1 (A)	ko00196:Photosynthesis - antenna proteins	--	--	Chlorophyll A-B binding protein	Chlorophyll a-b binding protein 1, chloroplastic (Precursor) OS=Oryza sativa subsp. japonica (Rice) PE=2 SV=2	--	--	Os01g0720500 [Oryza sativa Japonica Group]
PB.532.1	LOC_Os01g52260.1	[E]	Amino acid transport and metabolism	Cellular Component: cytosol (GO:0005829);; Biological Process: cysteine biosynthetic process from serine (GO:0006535);; Biological Process: protein targeting to membrane (GO:0006612);; Molecular Function: serine O-acetyltransferase activity (GO:0009001);; Biological Process: response to wounding (GO:0009611);; Biological Process: response to fungus (GO:0009620);; Biological Process: jasmonic acid…	K00640|3.15509e-172|osa:4324655|Os01g0720700; K00640 serine O-acetyltransferase [EC:2.3.1.30] (A)	ko00270:Cysteine and methionine metabolism;ko00920:Sulfur metabolism;ko01200:Carbon metabolism;ko01230:Biosynthesis of amino acids	[E]	Amino acid transport and metabolism	Serine acetyltransferase, N-terminal;; Bacterial transferase hexapeptide (six repeats)	Probable serine acetyltransferase 1 OS=Oryza sativa subsp. japonica (Rice) PE=2 SV=1	E	Amino acid transport and metabolism	Os01g0720700 [Oryza sativa Japonica Group]
PB.533.1	PB.533.1	--	--	Molecular Function: ADP binding (GO:0043531);;	--	--	--	--	NB-ARC domain	--	S	Function unknown	Os01g0721000 [Oryza sativa Japonica Group]
PB.534.1	LOC_Os01g52400.1	[M]	Cell wall/membrane/envelope biogenesis	Cellular Component: mitochondrion (GO:0005739);; Molecular Function: acyl-[acyl-carrier-protein]-UDP-N-acetylglucosamine O-acyltransferase activity (GO:0008780);; Biological Process: dolichol biosynthetic process (GO:0019408);; Biological Process: lipid X metabolic process (GO:2001289);;	K00677|0|osa:4324662|Os01g0722100; K00677 UDP-N-acetylglucosamine acyltransferase [EC:2.3.1.129] (A)	--	--	--	Bacterial transferase hexapeptide (six repeats);; Udp N-acetylglucosamine O-acyltransferase; Domain 2	Probable acyl-[acyl-carrier-protein]--UDP-N-acetylglucosamine O-acyltransferase, mitochondrial (Precursor) GN=LPXA OS=Arabidopsis thaliana (Mouse-ear cress) PE=1 SV=1	M	Cell wall/membrane/envelope biogenesis	Os01g0722100 [Oryza sativa Japonica Group]
PB.535.1	PB.535.1	[H]	Coenzyme transport and metabolism	Molecular Function: methyltransferase activity (GO:0008168);; Molecular Function: ribonuclease inhibitor activity (GO:0008428);; Biological Process: methylation (GO:0032259);; Biological Process: regulation of RNA metabolic process (GO:0051252);;	--	--	--	--	Demethylmenaquinone methyltransferase	Putative 4-hydroxy-4-methyl-2-oxoglutarate aldolase 2 GN=At5g16450 OS=Arabidopsis thaliana (Mouse-ear cress) PE=1 SV=1	H	Coenzyme transport and metabolism	Os01g0722800 [Oryza sativa Japonica Group]
PB.536.1	LOC_Os01g52500.2	[C]	Energy production and conversion	Molecular Function: malate dehydrogenase (decarboxylating) (NADP+) activity (GO:0004473);; Biological Process: gluconeogenesis (GO:0006094);; Biological Process: malate metabolic process (GO:0006108);; Biological Process: fatty acid biosynthetic process (GO:0006633);; Biological Process: cytoskeleton organization (GO:0007010);; Molecular Function: zinc ion binding (GO:0008270);; Cellular Componen…	K00029|0|obr:102719626|NADP-dependent malic enzyme-like; K00029 malate dehydrogenase (oxaloacetate-decarboxylating)(NADP+) [EC:1.1.1.40] (A)	ko00620:Pyruvate metabolism;ko00710:Carbon fixation in photosynthetic organisms;ko01200:Carbon metabolism	[C]	Energy production and conversion	Malic enzyme, NAD binding domain;; Malic enzyme, N-terminal domain	NADP-dependent malic enzyme OS=Vitis vinifera (Grape) PE=2 SV=1	C	Energy production and conversion	hypothetical protein OsI_03572 [Oryza sativa Indica Group]
PB.537.1	LOC_Os01g52594.1	--	--	Cellular Component: mitochondrion (GO:0005739);; Cellular Component: plastid (GO:0009536);;	--	--	--	--	--	--	--	--	Os07g0121500 [Oryza sativa Japonica Group]
PB.538.1	LOC_Os01g52630.1	[DZ]	--	Molecular Function: chromatin binding (GO:0003682);; Molecular Function: Ran GTPase binding (GO:0008536);;	--	--	[S]	Function unknown	Regulator of chromosome condensation (RCC1) repeat;; Regulator of chromosome condensation (RCC1) repeat	Ultraviolet-B receptor UVR8 GN=UVR8 OS=Arabidopsis thaliana (Mouse-ear cress) PE=1 SV=1	DZ	--	Os01g0725600 [Oryza sativa Japonica Group]
PB.539.1	PB.539.1	[R]	General function prediction only	Molecular Function: protein kinase activity (GO:0004672);; Molecular Function: ATP binding (GO:0005524);; Biological Process: protein phosphorylation (GO:0006468);;	--	--	--	--	WD domain, G-beta repeat;; Protein kinase domain;; Protein tyrosine kinase	Protein SPA1-RELATED 4 GN=SPA4 OS=Arabidopsis thaliana (Mouse-ear cress) PE=1 SV=1	T	Signal transduction mechanisms	hypothetical protein OsJ_03317 [Oryza sativa Japonica Group]
PB.540.1	LOC_Os01g52690.1	--	--	Molecular Function: DNA-directed RNA polymerase activity (GO:0003899);; Cellular Component: extracellular region (GO:0005576);; Biological Process: regulation of meristem growth (GO:0010075);; Cellular Component: cytoplasmic membrane-bounded vesicle (GO:0016023);; Biological Process: RNA biosynthetic process (GO:0032774);;	--	--	--	--	--	Protodermal factor 1 (Precursor) GN=PDF1 OS=Arabidopsis thaliana (Mouse-ear cress) PE=2 SV=1	S	Function unknown	hypothetical protein OsJ_03322 [Oryza sativa Japonica Group]
PB.541.1	PB.541.1	--	--	Cellular Component: mitochondrion (GO:0005739);;	--	--	--	--	--	--	--	--	hypothetical protein [Oryza sativa Japonica Group]
PB.542.1	LOC_Os01g52710.1	--	--	Biological Process: carbohydrate biosynthetic process (GO:0016051);; Molecular Function: polygalacturonate 4-alpha-galacturonosyltransferase activity (GO:0047262);;	--	--	--	--	Glycosyl transferase family 8	Probable galacturonosyltransferase 15 GN=GAUT15 OS=Arabidopsis thaliana (Mouse-ear cress) PE=2 SV=1	O	Posttranslational modification, protein turnover, chaperones	Os01g0727100 [Oryza sativa Japonica Group]
PB.543.1	LOC_Os01g52770.1	[IR]	--	Biological Process: lipid metabolic process (GO:0006629);; Cellular Component: cytoplasmic membrane-bounded vesicle (GO:0016023);; Molecular Function: hydrolase activity, acting on ester bonds (GO:0016788);;	--	--	--	--	GDSL-like Lipase/Acylhydrolase	GDSL esterase/lipase At5g45670 (Precursor) GN=At5g45670 OS=Arabidopsis thaliana (Mouse-ear cress) PE=2 SV=1	S	Function unknown	hypothetical protein OsI_03598 [Oryza sativa Indica Group]
PB.544.1	LOC_Os01g52920.1	--	--	--	--	--	--	--	--	--	S	Function unknown	hypothetical protein OsI_03611 [Oryza sativa Indica Group]
PB.545.1	LOC_Os01g53000.1	[G]	Carbohydrate transport and metabolism	Molecular Function: alpha,alpha-trehalose-phosphate synthase (UDP-forming) activity (GO:0003825);; Molecular Function: trehalose-phosphatase activity (GO:0004805);; Biological Process: trehalose biosynthetic process (GO:0005992);;	K16055|0|osa:4324423|Os01g0730300; K16055 trehalose 6-phosphate synthase/phosphatase [EC:2.4.1.15 3.1.3.12] (A)	ko00500:Starch and sucrose metabolism	[G]	Carbohydrate transport and metabolism	Glycosyltransferase family 20;; Trehalose-phosphatase;; haloacid dehalogenase-like hydrolase	Probable alpha,alpha-trehalose-phosphate synthase [UDP-forming] 7 GN=T2D23.11 OS=Arabidopsis thaliana (Mouse-ear cress) PE=1 SV=1	G	Carbohydrate transport and metabolism	hypothetical protein OsJ_03344 [Oryza sativa Japonica Group]
PB.546.1	LOC_Os01g53020.1	[C]	Energy production and conversion	Molecular Function: iron ion binding (GO:0005506);; Molecular Function: electron carrier activity (GO:0009055);; Cellular Component: chloroplast (GO:0009507);; Molecular Function: iron-sulfur cluster binding (GO:0051536);;	--	--	[O]	Posttranslational modification, protein turnover, chaperones	DnaJ domain;; 4Fe-4S single cluster domain;; 4Fe-4S single cluster domain	Chaperone protein dnaJ 10 GN=F28O16.7 OS=Arabidopsis thaliana (Mouse-ear cress) PE=2 SV=2	C	Energy production and conversion	Os01g0730500 [Oryza sativa Japonica Group]
PB.547.1	LOC_Os01g53140.1	--	--	Cellular Component: mitochondrial respiratory chain complex I (GO:0005747);; Biological Process: photorespiration (GO:0009853);; Cellular Component: cytoplasmic membrane-bounded vesicle (GO:0016023);;	--	--	--	--	--	--	S	Function unknown	Os01g0732100 [Oryza sativa Japonica Group]
PB.548.1	LOC_Os01g53150.2	[R]	General function prediction only	Biological Process: barrier septum assembly (GO:0000917);; Molecular Function: GTP binding (GO:0005525);; Cellular Component: mitochondrion (GO:0005739);; Biological Process: rRNA processing (GO:0006364);; Biological Process: tRNA metabolic process (GO:0006399);; Biological Process: chloroplast organization (GO:0009658);;	K03978|0|osa:4324152|Os01g0732200; K03978 GTP-binding protein (A)	--	[R]	General function prediction only	50S ribosome-binding GTPase;; Ferrous iron transport protein B;; Dynamin family	GTP-binding protein At2g22870 GN=EMB2001 OS=Arabidopsis thaliana (Mouse-ear cress) PE=2 SV=2	S	Function unknown	Os01g0732200 [Oryza sativa Japonica Group]
PB.549.1	LOC_Os01g53160.1	--	--	--	--	--	--	--	Transcriptional repressor, ovate	Transcription repressor OFP8 GN=OFP8 OS=Arabidopsis thaliana (Mouse-ear cress) PE=2 SV=1	S	Function unknown	Os01g0732300 [Oryza sativa Japonica Group]
PB.550.1	LOC_Os01g53240.1	--	--	Cellular Component: endosome (GO:0005768);; Cellular Component: Golgi apparatus (GO:0005794);; Cellular Component: trans-Golgi network (GO:0005802);; Biological Process: response to cold (GO:0009409);; Biological Process: response to salt stress (GO:0009651);; Molecular Function: nutrient reservoir activity (GO:0045735);;	--	--	--	--	BURP domain	BURP domain-containing protein 3 (Precursor) OS=Oryza sativa subsp. japonica (Rice) PE=2 SV=1	S	Function unknown	Os01g0733500 [Oryza sativa Japonica Group]
PB.551.1	LOC_Os01g53280.1	[J]	Translation, ribosomal structure and biogenesis	Molecular Function: structural constituent of ribosome (GO:0003735);; Cellular Component: mitochondrion (GO:0005739);; Cellular Component: ribosome (GO:0005840);; Biological Process: translation (GO:0006412);; Molecular Function: rRNA binding (GO:0019843);;	K02887|4.95975e-85|osa:4324162|Os01g0734100; K02887 large subunit ribosomal protein L20 (A)	ko03010:Ribosome	[J]	Translation, ribosomal structure and biogenesis	Ribosomal protein L20	50S ribosomal protein L20, chloroplastic GN=rpl20 OS=Chlorella vulgaris (Green alga) PE=3 SV=2	J	Translation, ribosomal structure and biogenesis	Os01g0734100 [Oryza sativa Japonica Group]
PB.552.1	LOC_Os01g53294.1	--	--	Biological Process: respiratory burst involved in defense response (GO:0002679);; Molecular Function: peroxidase activity (GO:0004601);; Molecular Function: calcium ion binding (GO:0005509);; Cellular Component: integral component of plasma membrane (GO:0005887);; Biological Process: response to ethylene (GO:0009723);; Biological Process: regulation of stomatal movement (GO:0010119);; Biological …	--	--	[PQ]	--	Ferric reductase NAD binding domain;; FAD-binding domain;; Ferric reductase like transmembrane component;; Respiratory burst NADPH oxidase	Respiratory burst oxidase homolog protein F GN=F22C12.18 OS=Arabidopsis thaliana (Mouse-ear cress) PE=1 SV=1	U	Intracellular trafficking, secretion, and vesicular transport	Os01g0734200 [Oryza sativa Japonica Group]
PB.553.1	LOC_Os01g53330.1	--	--	Biological Process: metabolic process (GO:0008152);; Molecular Function: transferase activity, transferring hexosyl groups (GO:0016758);;	--	--	[GC]	--	UDP-glucoronosyl and UDP-glucosyl transferase	Anthocyanidin 5,3-O-glucosyltransferase GN=RhGT1 OS=Rosa hybrid cultivar PE=2 SV=1	S	Function unknown	Os01g0734600 [Oryza sativa Japonica Group]
PB.554.1	LOC_Os01g53350.1	--	--	Biological Process: metabolic process (GO:0008152);; Molecular Function: transferase activity, transferring hexosyl groups (GO:0016758);;	--	--	[GC]	--	UDP-glucoronosyl and UDP-glucosyl transferase	Anthocyanidin 5,3-O-glucosyltransferase GN=RhGT1 OS=Rosa hybrid cultivar PE=2 SV=1	S	Function unknown	Os01g0734800 [Oryza sativa Japonica Group]
PB.555.1	PB.555.1	--	--	Biological Process: metabolic process (GO:0008152);; Molecular Function: transferase activity, transferring hexosyl groups (GO:0016758);;	--	--	[GC]	--	UDP-glucoronosyl and UDP-glucosyl transferase	Anthocyanidin 5,3-O-glucosyltransferase GN=RhGT1 OS=Rosa hybrid cultivar PE=2 SV=1	S	Function unknown	hypothetical protein OsI_03648 [Oryza sativa Indica Group]
PB.556.1	LOC_Os01g53520.1	--	--	Cellular Component: membrane (GO:0016020);;	--	--	[U]	Intracellular trafficking, secretion, and vesicular transport	Reticulon	Reticulon-like protein B1 GN=F9D16.100 OS=Arabidopsis thaliana (Mouse-ear cress) PE=1 SV=1	U	Intracellular trafficking, secretion, and vesicular transport	Os01g0736900 [Oryza sativa Japonica Group]
PB.557.1	PB.557.1	[E]	Amino acid transport and metabolism	Molecular Function: DNA binding (GO:0003677);; Molecular Function: catalytic activity (GO:0003824);; Biological Process: DNA-dependent DNA replication (GO:0006261);; Molecular Function: zinc ion binding (GO:0008270);; Cellular Component: plastid (GO:0009536);;	K08073|0|obr:102705386|polynucleotide 3'-phosphatase ZDP-like; K08073 bifunctional polynucleotide phosphatase/kinase [EC:3.1.3.32 2.7.1.78] (A)	--	[L]	Replication, recombination and repair	Polynucleotide kinase 3 phosphatase;; Poly(ADP-ribose) polymerase and DNA-Ligase Zn-finger region	Polynucleotide 3&apos;-phosphatase ZDP GN=ZDP OS=Arabidopsis thaliana (Mouse-ear cress) PE=1 SV=1	E	Amino acid transport and metabolism	putative phosphoesterase [Oryza sativa Japonica Group]
PB.558.1	LOC_Os01g53620.1	--	--	Cellular Component: plastid (GO:0009536);;	--	--	--	--	--	--	S	Function unknown	Os01g0738000 [Oryza sativa Japonica Group]
PB.559.1	LOC_Os01g53640.1	[RTKL]	--	Molecular Function: protein serine/threonine kinase activity (GO:0004674);; Molecular Function: ATP binding (GO:0005524);; Cellular Component: plasma membrane (GO:0005886);; Biological Process: protein phosphorylation (GO:0006468);; Cellular Component: plastid (GO:0009536);;	--	--	[T]	Signal transduction mechanisms	Protein kinase domain;; Protein tyrosine kinase	Proline-rich receptor-like protein kinase PERK8 GN=PERK8 OS=Arabidopsis thaliana (Mouse-ear cress) PE=1 SV=1	T	Signal transduction mechanisms	Os01g0738300 [Oryza sativa Japonica Group]
PB.560.1	LOC_Os01g53670.2	--	--	--	K12471|0|osa:4327195|Os01g0738600; K12471 epsin (A)	ko04144:Endocytosis	[F]	Nucleotide transport and metabolism	ENTH domain	Clathrin interactor EPSIN 1 GN=T22P22.100 OS=Arabidopsis thaliana (Mouse-ear cress) PE=1 SV=1	U	Intracellular trafficking, secretion, and vesicular transport	Os01g0738600 [Oryza sativa Japonica Group]
PB.561.1	PB.561.1	[T]	Signal transduction mechanisms	Molecular Function: phosphatidylinositol-4,5-bisphosphate 5-phosphatase activity (GO:0004439);; Molecular Function: protein tyrosine phosphatase activity (GO:0004725);; Molecular Function: protein tyrosine/serine/threonine phosphatase activity (GO:0008138);; Biological Process: peptidyl-tyrosine dephosphorylation (GO:0035335);; Biological Process: inositol phosphate dephosphorylation (GO:0046855)…	K14165|0|osa:4327199|Os01g0739200; K14165 atypical dual specificity phosphatase [EC:3.1.3.16 3.1.3.48] (A)	--	[V]	Defense mechanisms	Dual specificity phosphatase, catalytic domain	Putative dual specificity protein phosphatase DSP8 GN=DSP8 OS=Arabidopsis thaliana (Mouse-ear cress) PE=2 SV=2	T	Signal transduction mechanisms	Os01g0739200 [Oryza sativa Japonica Group]
PB.561.2	LOC_Os01g53710.1	[T]	Signal transduction mechanisms	Molecular Function: phosphatidylinositol-4,5-bisphosphate 5-phosphatase activity (GO:0004439);; Molecular Function: protein tyrosine phosphatase activity (GO:0004725);; Molecular Function: protein tyrosine/serine/threonine phosphatase activity (GO:0008138);; Biological Process: peptidyl-tyrosine dephosphorylation (GO:0035335);; Biological Process: inositol phosphate dephosphorylation (GO:0046855)…	K14165|0|osa:4327199|Os01g0739200; K14165 atypical dual specificity phosphatase [EC:3.1.3.16 3.1.3.48] (A)	--	[V]	Defense mechanisms	Dual specificity phosphatase, catalytic domain	Putative dual specificity protein phosphatase DSP8 GN=DSP8 OS=Arabidopsis thaliana (Mouse-ear cress) PE=2 SV=2	T	Signal transduction mechanisms	Os01g0739200 [Oryza sativa Japonica Group]
PB.562.1	LOC_Os01g53720.2	[R]	General function prediction only	Molecular Function: metalloendopeptidase activity (GO:0004222);; Cellular Component: mitochondrion (GO:0005739);; Biological Process: rRNA processing (GO:0006364);;	--	--	--	--	haloacid dehalogenase-like hydrolase;; Uncharacterized protein family UPF0054;; Sucrose-6F-phosphate phosphohydrolase;; haloacid dehalogenase-like hydrolase;; haloacid dehalogenase-like hydrolase	--	S	Function unknown	haloacid dehalogenase-like hydrolase-like [Oryza sativa Japonica Group]
PB.563.1	PB.563.1	--	--	Molecular Function: hydrolase activity, hydrolyzing O-glycosyl compounds (GO:0004553);; Biological Process: carbohydrate metabolic process (GO:0005975);; Cellular Component: plant-type cell wall (GO:0009505);; Cellular Component: cytoplasmic membrane-bounded vesicle (GO:0016023);; Molecular Function: cation binding (GO:0043169);; Cellular Component: anchored component of plasma membrane (GO:00466…	--	--	--	--	Glycosyl hydrolases family 17;; X8 domain	Glucan endo-1,3-beta-glucosidase 13 (Precursor) GN=At5g56590 OS=Arabidopsis thaliana (Mouse-ear cress) PE=1 SV=1	G	Carbohydrate transport and metabolism	Os01g0739700 [Oryza sativa Japonica Group]
PB.563.2	PB.563.2	--	--	Molecular Function: catalytic activity (GO:0003824);; Cellular Component: cell part (GO:0044464);;	--	--	--	--	Glycosyl hydrolases family 17;; Glycosyl hydrolases family 17;; X8 domain	Glucan endo-1,3-beta-glucosidase 13 (Precursor) GN=At5g56590 OS=Arabidopsis thaliana (Mouse-ear cress) PE=1 SV=1	G	Carbohydrate transport and metabolism	Os01g0739700 [Oryza sativa Japonica Group]
PB.565.1	LOC_Os01g53880.5	--	--	Cellular Component: nucleus (GO:0005634);; Biological Process: regulation of transcription, DNA-templated (GO:0006355);; Biological Process: regulation of translation (GO:0006417);; Biological Process: auxin-activated signaling pathway (GO:0009734);; Molecular Function: protein dimerization activity (GO:0046983);;	K14484|0|osa:4326541|Os01g0741900; K14484 auxin-responsive protein IAA (A)	ko04075:Plant hormone signal transduction	--	--	AUX/IAA family	Auxin-responsive protein IAA6 GN=P0439E07.11 OS=Oryza sativa subsp. japonica (Rice) PE=2 SV=1	K	Transcription	Os01g0741900 [Oryza sativa Japonica Group]
PB.566.1	LOC_Os01g54010.1	--	--	Molecular Function: carboxypeptidase activity (GO:0004180);; Cellular Component: vacuole (GO:0005773);; Biological Process: proteolysis (GO:0006508);;	K01301|0|osa:4326550|Os01g0743300; K01301 N-acetylated-alpha-linked acidic dipeptidase [EC:3.4.17.21] (A)	--	[OPR]	--	Transferrin receptor-like dimerisation domain;; Peptidase family M28;; PA domain	Probable glutamate carboxypeptidase 2 GN=AMP1 OS=Arabidopsis thaliana (Mouse-ear cress) PE=1 SV=3	S	Function unknown	Os01g0743300 [Oryza sativa Japonica Group]
PB.567.1	LOC_Os01g54080.1	[Z]	Cytoskeleton	Molecular Function: microtubule motor activity (GO:0003777);; Molecular Function: ATP binding (GO:0005524);; Cellular Component: kinesin complex (GO:0005871);; Cellular Component: microtubule (GO:0005874);; Cellular Component: plasma membrane (GO:0005886);; Biological Process: microtubule-based movement (GO:0007018);; Molecular Function: microtubule binding (GO:0008017);;	K10406|0|osa:4326167|Os01g0744000; K10406 kinesin family member C2/C3 (A)	--	[Z]	Cytoskeleton	Kinesin motor domain	Kinesin KP1 GN=KP1 OS=Arabidopsis thaliana (Mouse-ear cress) PE=1 SV=2	Z	Cytoskeleton	Os01g0744000 [Oryza sativa Japonica Group]
PB.568.1	LOC_Os01g54240.1	--	--	Biological Process: mitotic G2 phase (GO:0000085);; Cellular Component: nuclear envelope (GO:0005635);; Biological Process: mRNA export from nucleus (GO:0006406);; Biological Process: photomorphogenesis (GO:0009640);; Biological Process: embryo development ending in seed dormancy (GO:0009793);; Biological Process: seed germination (GO:0009845);; Biological Process: regulation of flower developmen…	K14304|0|osa:4326176|Os01g0746200; K14304 nuclear pore complex protein Nup85 (A)	ko03013:RNA transport	[YU]	--	Nup85 Nucleoporin	Nuclear pore complex protein NUP85 OS=Arabidopsis thaliana (Mouse-ear cress) PE=1 SV=1	U	Intracellular trafficking, secretion, and vesicular transport	Os01g0746200 [Oryza sativa Japonica Group]
PB.568.2	LOC_Os01g54240.1	--	--	Biological Process: mitotic G2 phase (GO:0000085);; Cellular Component: nuclear envelope (GO:0005635);; Biological Process: mRNA export from nucleus (GO:0006406);; Biological Process: photomorphogenesis (GO:0009640);; Biological Process: embryo development ending in seed dormancy (GO:0009793);; Biological Process: seed germination (GO:0009845);; Biological Process: regulation of flower developmen…	K14304|0|osa:4326176|Os01g0746200; K14304 nuclear pore complex protein Nup85 (A)	ko03013:RNA transport	[YU]	--	Nup85 Nucleoporin	Nuclear pore complex protein NUP85 OS=Arabidopsis thaliana (Mouse-ear cress) PE=1 SV=1	U	Intracellular trafficking, secretion, and vesicular transport	Os01g0746200 [Oryza sativa Japonica Group]
PB.569.1	PB.569.1	--	--	--	--	--	--	--	Protein of unknown function (DUF506);; Protein of unknown function (DUF506)	--	S	Function unknown	hypothetical protein OsI_03718 [Oryza sativa Indica Group]
PB.570.1	LOC_Os01g54370.1	[F]	Nucleotide transport and metabolism	Molecular Function: dihydroorotase activity (GO:0004151);; Cellular Component: mitochondrion (GO:0005739);; Cellular Component: chloroplast (GO:0009507);; Biological Process: pyrimidine nucleobase biosynthetic process (GO:0019856);; Biological Process: 'de novo' UMP biosynthetic process (GO:0044205);; Molecular Function: metal ion binding (GO:0046872);;	K01465|0|osa:4325542|Os01g0747500; K01465 dihydroorotase [EC:3.5.2.3] (A)	ko00240:Pyrimidine metabolism	[F]	Nucleotide transport and metabolism	Amidohydrolase family	Dihydroorotase, mitochondrial (Precursor) OS=Oryza sativa subsp. japonica (Rice) PE=2 SV=1	F	Nucleotide transport and metabolism	Os01g0747500 [Oryza sativa Japonica Group]
PB.571.1	LOC_Os01g54390.1	[S]	Function unknown	Molecular Function: RNA binding (GO:0003723);; Cellular Component: mitochondrion (GO:0005739);; Cellular Component: chloroplast (GO:0009507);;	--	--	[S]	Function unknown	S4 domain	--	S	Function unknown	Os01g0747700 [Oryza sativa Japonica Group]
PB.572.1	LOC_Os01g54510.1	--	--	Biological Process: MAPK cascade (GO:0000165);; Biological Process: respiratory burst involved in defense response (GO:0002679);; Molecular Function: transporter activity (GO:0005215);; Biological Process: protein targeting to membrane (GO:0006612);; Biological Process: membrane fusion (GO:0006944);; Biological Process: systemic acquired resistance, salicylic acid mediated signaling pathway (GO:0…	--	--	--	--	MAC/Perforin domain	MACPF domain-containing protein CAD1 GN=CAD1 OS=Arabidopsis thaliana (Mouse-ear cress) PE=2 SV=1	S	Function unknown	Os01g0748900 [Oryza sativa Japonica Group]
PB.573.1	LOC_Os01g54540.1	[J]	Translation, ribosomal structure and biogenesis	Molecular Function: structural constituent of ribosome (GO:0003735);; Cellular Component: ribosome (GO:0005840);; Biological Process: translation (GO:0006412);; Cellular Component: chloroplast stroma (GO:0009570);; Cellular Component: thylakoid (GO:0009579);; Biological Process: embryo development ending in seed dormancy (GO:0009793);; Cellular Component: chloroplast envelope (GO:0009941);; Biolo…	K02871|5.98574e-132|osa:4325555|Os01g0749200; K02871 large subunit ribosomal protein L13 (A)	ko03010:Ribosome	[J]	Translation, ribosomal structure and biogenesis	Ribosomal protein L13	50S ribosomal protein L13, chloroplastic (Precursor) GN=T30F21.4 OS=Arabidopsis thaliana (Mouse-ear cress) PE=2 SV=1	J	Translation, ribosomal structure and biogenesis	Os01g0749200 [Oryza sativa Japonica Group]
PB.574.1	LOC_Os01g54550.1	--	--	Molecular Function: sequence-specific DNA binding transcription factor activity (GO:0003700);; Cellular Component: nucleus (GO:0005634);; Cellular Component: cytoplasm (GO:0005737);; Biological Process: regulation of transcription, DNA-templated (GO:0006355);; Biological Process: response to heat (GO:0009408);; Molecular Function: sequence-specific DNA binding (GO:0043565);;	K09414|0|osa:4325556|Os01g0749300; K09414 heat shock transcription factor 1 (A)	--	[K]	Transcription	HSF-type DNA-binding	Heat stress transcription factor A-4b OS=Oryza sativa subsp. japonica (Rice) PE=2 SV=1	K	Transcription	Os01g0749300 [Oryza sativa Japonica Group]
PB.575.1	LOC_Os01g54580.1	[GER]	--	Cellular Component: integral component of membrane (GO:0016021);;	K15280|0|osa:4324622|Os01g0749900; K15280 solute carrier family 35, member C2 (A)	--	[S]	Function unknown	Triose-phosphate Transporter family;; EamA-like transporter family;; UAA transporter family	Probable sugar phosphate/phosphate translocator At1g06470 GN=At1g06470 OS=Arabidopsis thaliana (Mouse-ear cress) PE=2 SV=1	EG	--	Os01g0749900 [Oryza sativa Japonica Group]
PB.576.1	LOC_Os01g54590.1	[R]	General function prediction only	Molecular Function: DNA binding (GO:0003677);; Molecular Function: GTPase activity (GO:0003924);; Molecular Function: GTP binding (GO:0005525);; Cellular Component: nucleus (GO:0005634);; Cellular Component: vacuolar membrane (GO:0005774);; Cellular Component: trans-Golgi network (GO:0005802);; Cellular Component: plasma membrane (GO:0005886);; Biological Process: GTP catabolic process (GO:000618…	K07976|4.32614e-161|osa:4324623|Os01g0750000; K07976 Rab family, other (A)	--	[U]	Intracellular trafficking, secretion, and vesicular transport	Ras family;; Miro-like protein;; ADP-ribosylation factor family;; 50S ribosome-binding GTPase	Ras-related protein RIC2 OS=Oryza sativa subsp. japonica (Rice) PE=2 SV=2	S	Function unknown	Os01g0750000 [Oryza sativa Japonica Group]
PB.577.1	LOC_Os01g54620.1	[M]	Cell wall/membrane/envelope biogenesis	Cellular Component: cell wall (GO:0005618);; Cellular Component: plasma membrane (GO:0005886);; Biological Process: response to osmotic stress (GO:0006970);; Molecular Function: zinc ion binding (GO:0008270);; Biological Process: response to water deprivation (GO:0009414);; Biological Process: plant-type secondary cell wall biogenesis (GO:0009834);; Biological Process: positive regulation of absc…	K10999|0|osa:4324625|Os01g0750300; K10999 cellulose synthase A [EC:2.4.1.12] (A)	--	--	--	Cellulose synthase;; Glycosyltransferase like family 2;; Glycosyl transferase family group 2	Cellulose synthase A catalytic subunit 4 [UDP-forming] GN=P0046E05.4 OS=Oryza sativa subsp. japonica (Rice) PE=2 SV=1	M	Cell wall/membrane/envelope biogenesis	Os01g0750300 [Oryza sativa Japonica Group]
PB.578.1	LOC_Os01g54784.1	--	--	Biological Process: fatty acid beta-oxidation (GO:0006635);; Cellular Component: membrane (GO:0016020);; Biological Process: protein import into peroxisome matrix (GO:0016558);;	--	--	--	--	Protein of unknown function (DUF1084)	--	S	Function unknown	Os01g0751300 [Oryza sativa Japonica Group]
PB.579.1	LOC_Os01g54850.1	--	--	Molecular Function: translation elongation factor activity (GO:0003746);; Cellular Component: intracellular (GO:0005622);; Biological Process: translational elongation (GO:0006414);;	--	--	--	--	FBD;; F-box domain	Putative FBD-associated F-box protein At1g61330 GN=At1g61330 OS=Arabidopsis thaliana (Mouse-ear cress) PE=4 SV=1	S	Function unknown	Os01g0752100 [Oryza sativa Japonica Group]
PB.580.1	LOC_Os01g54910.1	[T]	Signal transduction mechanisms	Molecular Function: translation elongation factor activity (GO:0003746);; Molecular Function: GTPase activity (GO:0003924);; Molecular Function: GTP binding (GO:0005525);; Cellular Component: mitochondrion (GO:0005739);; Biological Process: GTP catabolic process (GO:0006184);; Biological Process: translational elongation (GO:0006414);; Biological Process: protein targeting to mitochondrion (GO:00…	K06207|0|osa:4327008|Os01g0752700; K06207 GTP-binding protein (A)	--	[J]	Translation, ribosomal structure and biogenesis	Elongation factor Tu GTP binding domain;; Elongation factor G C-terminus;; Elongation factor Tu domain 2	Translation factor GUF1 homolog, mitochondrial {ECO:0000255|HAMAP-Rule:MF_03137} (Precursor) GN=THAPSDRAFT_40001 OS=Thalassiosira pseudonana (Marine diatom) PE=3 SV=1	T	Signal transduction mechanisms	Os01g0752700 [Oryza sativa Japonica Group]
PB.581.1	LOC_Os01g54940.1	[CR]	--	Molecular Function: nucleotide binding (GO:0000166);; Molecular Function: NADPH:quinone reductase activity (GO:0003960);; Cellular Component: mitochondrion (GO:0005739);; Molecular Function: zinc ion binding (GO:0008270);; Biological Process: oxidation-reduction process (GO:0055114);;	--	--	[CR]	--	Zinc-binding dehydrogenase;; Zinc-binding dehydrogenase;; Alcohol dehydrogenase GroES-like domain	2-methylene-furan-3-one reductase GN=EO OS=Fragaria ananassa (Strawberry) PE=1 SV=1	C	Energy production and conversion	Os01g0753100 [Oryza sativa Japonica Group]
PB.582.1	LOC_Os01g55000.1	--	--	Cellular Component: cytoplasmic membrane-bounded vesicle (GO:0016023);;	--	--	--	--	--	--	S	Function unknown	Os01g0753800 [Oryza sativa Japonica Group]
PB.583.1	LOC_Os01g55020.5	--	--	Cellular Component: mitochondrion (GO:0005739);; Cellular Component: plastid (GO:0009536);;	--	--	--	--	--	--	S	Function unknown	Os01g0754000 [Oryza sativa Japonica Group]
PB.584.1	LOC_Os01g55190.1	--	--	Cellular Component: plasma membrane (GO:0005886);; Cellular Component: cytoplasmic membrane-bounded vesicle (GO:0016023);;	--	--	--	--	Protein of unknown function (DUF642)	--	S	Function unknown	Os01g0756600 [Oryza sativa Japonica Group]
PB.585.1	LOC_Os01g55240.1	[R]	General function prediction only	Molecular Function: iron ion binding (GO:0005506);; Biological Process: response to red light (GO:0010114);; Biological Process: gibberellin catabolic process (GO:0045487);; Molecular Function: C-19 gibberellin 2-beta-dioxygenase activity (GO:0052634);; Biological Process: oxidation-reduction process (GO:0055114);;	K04125|0|osa:4325145|Os01g0757200; K04125 gibberellin 2-oxidase [EC:1.14.11.13] (A)	ko00904:Diterpenoid biosynthesis	[QR]	--	2OG-Fe(II) oxygenase superfamily;; non-haem dioxygenase in morphine synthesis N-terminal	Gibberellin 2-beta-dioxygenase GN=GA2OX1 OS=Phaseolus coccineus (Scarlet runner bean) PE=2 SV=1	S	Function unknown	Os01g0757200 [Oryza sativa Japonica Group]
PB.586.1	PB.586.1	[O]	Posttranslational modification, protein turnover, chaperones	Molecular Function: ATP binding (GO:0005524);; Molecular Function: nucleoside-triphosphatase activity (GO:0017111);;	--	--	[O]	Posttranslational modification, protein turnover, chaperones	ATPase family associated with various cellular activities (AAA);; Holliday junction DNA helicase ruvB N-terminus;; AAA domain (dynein-related subfamily)	Katanin p60 ATPase-containing subunit A1 {ECO:0000255|HAMAP-Rule:MF_03023} GN=At1g80350 OS=Arabidopsis thaliana (Mouse-ear cress) PE=1 SV=1	O	Posttranslational modification, protein turnover, chaperones	hypothetical protein OsJ_03507 [Oryza sativa Japonica Group]
PB.587.1	LOC_Os01g55300.2	[L]	Replication, recombination and repair	Molecular Function: damaged DNA binding (GO:0003684);; Molecular Function: DNA-directed DNA polymerase activity (GO:0003887);; Biological Process: DNA-dependent DNA replication (GO:0006261);; Biological Process: response to UV-B (GO:0010224);; Biological Process: error-prone translesion synthesis (GO:0042276);; Biological Process: D-xylose metabolic process (GO:0042732);;	K03509|0|osa:4325305|Os01g0757800; K03509 DNA polymerase eta [EC:2.7.7.7] (A)	--	[L]	Replication, recombination and repair	impB/mucB/samB family;; impB/mucB/samB family C-terminal domain	DNA polymerase eta OS=Arabidopsis thaliana (Mouse-ear cress) PE=1 SV=1	L	Replication, recombination and repair	putative DNA polymerase [Oryza sativa Japonica Group]
PB.587.2	PB.587.2	[L]	Replication, recombination and repair	Molecular Function: damaged DNA binding (GO:0003684);; Molecular Function: DNA-directed DNA polymerase activity (GO:0003887);; Biological Process: DNA-dependent DNA replication (GO:0006261);; Biological Process: response to UV-B (GO:0010224);; Biological Process: error-prone translesion synthesis (GO:0042276);; Biological Process: D-xylose metabolic process (GO:0042732);;	K03509|0|osa:4325305|Os01g0757800; K03509 DNA polymerase eta [EC:2.7.7.7] (A)	--	[L]	Replication, recombination and repair	impB/mucB/samB family;; impB/mucB/samB family C-terminal domain	DNA polymerase eta OS=Arabidopsis thaliana (Mouse-ear cress) PE=1 SV=1	L	Replication, recombination and repair	putative DNA polymerase [Oryza sativa Japonica Group]
PB.588.1	LOC_Os01g55390.1	[L]	Replication, recombination and repair	Molecular Function: DNA binding (GO:0003677);; Molecular Function: RNA binding (GO:0003723);; Molecular Function: RNA-directed DNA polymerase activity (GO:0003964);; Molecular Function: aspartic-type endopeptidase activity (GO:0004190);; Cellular Component: nucleus (GO:0005634);; Biological Process: RNA-dependent DNA replication (GO:0006278);; Biological Process: DNA recombination (GO:0006310);; …	--	--	[R]	General function prediction only	Reverse transcriptase (RNA-dependent DNA polymerase)	Uncharacterized mitochondrial protein AtMg00860 GN=AtMg00860 OS=Arabidopsis thaliana (Mouse-ear cress) PE=4 SV=1	L	Replication, recombination and repair	unnamed protein product [Oryza sativa Japonica Group]
PB.589.1	PB.589.1	--	--	--	--	--	--	--	Protein of unknown function (DUF688)	--	S	Function unknown	hypothetical protein OsI_03806 [Oryza sativa Indica Group]
PB.590.1	LOC_Os01g55490.1	--	--	Cellular Component: mitochondrion (GO:0005739);;	--	--	[K]	Transcription	HCNGP-like protein	--	S	Function unknown	transcriptional regulator family protein-like [Oryza sativa Japonica Group]
PB.591.1	LOC_Os01g55500.1	--	--	Molecular Function: transporter activity (GO:0005215);; Cellular Component: membrane (GO:0016020);; Biological Process: transmembrane transport (GO:0055085);;	K14611|0|obr:102701769|nucleobase-ascorbate transporter 2-like; K14611 solute carrier family 23 (nucleobase transporter), member 1/2 (A)	--	[F]	Nucleotide transport and metabolism	Permease family	Nucleobase-ascorbate transporter 2 GN=NAT2 OS=Arabidopsis thaliana (Mouse-ear cress) PE=2 SV=2	F	Nucleotide transport and metabolism	putative permease 1 [Oryza sativa Japonica Group]
PB.593.1	PB.593.1	--	--	Biological Process: metabolic process (GO:0008152);; Biological Process: cellular process (GO:0009987);;	--	--	--	--	--	--	S	Function unknown	Os01g0761000 [Oryza sativa Japonica Group]
PB.594.1	PB.594.1	[IQ]	--	Cellular Component: nucleus (GO:0005634);; Cellular Component: cytosol (GO:0005829);; Cellular Component: membrane (GO:0016020);; Molecular Function: AMP binding (GO:0016208);; Molecular Function: malonyl-CoA synthetase activity (GO:0090409);; Biological Process: malonate catabolic process (GO:0090410);;	K18660|0|obr:102703440|malonate--CoA ligase-like; K18660 malonyl-CoA/methylmalonyl-CoA synthetase [EC:6.2.1.-] (A)	ko00280:Valine, leucine and isoleucine degradation	[I]	Lipid transport and metabolism	AMP-binding enzyme;; AMP-binding enzyme C-terminal domain	Malonate--CoA ligase GN=AAE13 OS=Arabidopsis thaliana (Mouse-ear cress) PE=1 SV=1	IQ	--	hypothetical protein OsI_03826 [Oryza sativa Indica Group]
PB.594.2	LOC_Os01g55590.1	[IQ]	--	Cellular Component: nucleus (GO:0005634);; Cellular Component: cytosol (GO:0005829);; Cellular Component: membrane (GO:0016020);; Molecular Function: AMP binding (GO:0016208);; Molecular Function: malonyl-CoA synthetase activity (GO:0090409);; Biological Process: malonate catabolic process (GO:0090410);;	K18660|0|obr:102703440|malonate--CoA ligase-like; K18660 malonyl-CoA/methylmalonyl-CoA synthetase [EC:6.2.1.-] (A)	ko00280:Valine, leucine and isoleucine degradation	[I]	Lipid transport and metabolism	AMP-binding enzyme;; AMP-binding enzyme C-terminal domain	Malonate--CoA ligase GN=AAE13 OS=Arabidopsis thaliana (Mouse-ear cress) PE=1 SV=1	IQ	--	hypothetical protein OsI_03826 [Oryza sativa Indica Group]
PB.595.1	LOC_Os01g55780.1	[C]	Energy production and conversion	Cellular Component: vacuole (GO:0005773);; Biological Process: glycerol metabolic process (GO:0006071);; Biological Process: lipid metabolic process (GO:0006629);; Molecular Function: glycerophosphodiester phosphodiesterase activity (GO:0008889);; Cellular Component: cytoplasmic membrane-bounded vesicle (GO:0016023);;	K01126|0|osa:4327034|Os01g0763600; K01126 glycerophosphoryl diester phosphodiesterase [EC:3.1.4.46] (A)	ko00564:Glycerophospholipid metabolism	[C]	Energy production and conversion	Glycerophosphoryl diester phosphodiesterase family	Glycerophosphodiester phosphodiesterase GDPD6 {ECO:0000305} (Precursor) OS=Arabidopsis thaliana (Mouse-ear cress) PE=2 SV=1	C	Energy production and conversion	Os01g0763600 [Oryza sativa Japonica Group]
PB.595.2	LOC_Os01g55780.1	[C]	Energy production and conversion	Cellular Component: vacuole (GO:0005773);; Biological Process: glycerol metabolic process (GO:0006071);; Biological Process: lipid metabolic process (GO:0006629);; Molecular Function: glycerophosphodiester phosphodiesterase activity (GO:0008889);; Cellular Component: cytoplasmic membrane-bounded vesicle (GO:0016023);;	K01126|0|osa:4327034|Os01g0763600; K01126 glycerophosphoryl diester phosphodiesterase [EC:3.1.4.46] (A)	ko00564:Glycerophospholipid metabolism	[C]	Energy production and conversion	Glycerophosphoryl diester phosphodiesterase family	Glycerophosphodiester phosphodiesterase GDPD6 {ECO:0000305} (Precursor) OS=Arabidopsis thaliana (Mouse-ear cress) PE=2 SV=1	C	Energy production and conversion	Os01g0763600 [Oryza sativa Japonica Group]
PB.596.1	LOC_Os01g55799.1	--	--	Cellular Component: exocyst (GO:0000145);; Biological Process: exocytosis (GO:0006887);;	K07195|0|osa:4326884|Os01g0763700; K07195 exocyst complex component 7 (A)	--	[U]	Intracellular trafficking, secretion, and vesicular transport	Exo70 exocyst complex subunit	Exocyst complex component EXO70B1 GN=EXO70B1 OS=Arabidopsis thaliana (Mouse-ear cress) PE=1 SV=1	S	Function unknown	Os01g0763700 [Oryza sativa Japonica Group]
PB.597.1	LOC_Os01g55799.1	--	--	Cellular Component: exocyst (GO:0000145);; Biological Process: exocytosis (GO:0006887);;	K07195|0|osa:4326884|Os01g0763700; K07195 exocyst complex component 7 (A)	--	[U]	Intracellular trafficking, secretion, and vesicular transport	Exo70 exocyst complex subunit	Exocyst complex component EXO70B1 GN=EXO70B1 OS=Arabidopsis thaliana (Mouse-ear cress) PE=1 SV=1	S	Function unknown	Os01g0763700 [Oryza sativa Japonica Group]
PB.598.1	LOC_Os01g56100.1	--	--	--	--	--	--	--	BSD domain	--	S	Function unknown	hypothetical protein OsJ_03578 [Oryza sativa Japonica Group]
PB.599.1	LOC_Os01g56180.1	--	--	Cellular Component: endoplasmic reticulum (GO:0005783);; Biological Process: protein folding (GO:0006457);; Biological Process: ER-nucleus signaling pathway (GO:0006984);; Biological Process: response to heat (GO:0009408);; Biological Process: pollen development (GO:0009555);; Biological Process: response to high light intensity (GO:0009644);; Biological Process: response to endoplasmic reticulum…	--	--	--	--	--	--	S	Function unknown	Os01g0767600 [Oryza sativa Japonica Group]
PB.600.1	LOC_Os01g56190.1	[L]	Replication, recombination and repair	Molecular Function: nucleic acid binding (GO:0003676);; Molecular Function: ATP binding (GO:0005524);; Molecular Function: ATP-dependent helicase activity (GO:0008026);; Cellular Component: plastid (GO:0009536);;	--	--	[A]	RNA processing and modification	Helicase associated domain (HA2);; Helicase conserved C-terminal domain;; R3H domain;; Oligonucleotide/oligosaccharide-binding (OB)-fold;; DEAD/DEAH box helicase	Probable pre-mRNA-splicing factor ATP-dependent RNA helicase GN=At3g26560 OS=Arabidopsis thaliana (Mouse-ear cress) PE=1 SV=2	L	Replication, recombination and repair	Os01g0767700 [Oryza sativa Japonica Group]
PB.601.1	LOC_Os01g56200.1	--	--	Cellular Component: nucleus (GO:0005634);; Cellular Component: plastid (GO:0009536);; Biological Process: defense response to bacterium, incompatible interaction (GO:0009816);; Biological Process: defense response to fungus, incompatible interaction (GO:0009817);;	K14508|0|osa:4325503|Os01g0767900; K14508 regulatory protein NPR1 (A)	ko04075:Plant hormone signal transduction	[R]	General function prediction only	NPR1/NIM1 like defence protein C terminal;; Domain of unknown function (DUF3420);; Ankyrin repeats (3 copies);; Ankyrin repeat;; Ankyrin repeats (many copies);; Ankyrin repeat;; Ankyrin repeats (many copies);; BTB/POZ domain	Regulatory protein NPR3 GN=NPR3 OS=Arabidopsis thaliana (Mouse-ear cress) PE=1 SV=1	S	Function unknown	Os01g0767900 [Oryza sativa Japonica Group]
PB.602.1	LOC_Os01g56300.1	--	--	--	K12617|0|osa:4325594|Os01g0769000; K12617 DNA topoisomerase 2-associated protein PAT1 (A)	ko03018:RNA degradation	--	--	Topoisomerase II-associated protein PAT1	--	S	Function unknown	Os01g0769000 [Oryza sativa Japonica Group]
PB.602.2	LOC_Os01g56300.1	--	--	--	K12617|0|osa:4325594|Os01g0769000; K12617 DNA topoisomerase 2-associated protein PAT1 (A)	ko03018:RNA degradation	--	--	Topoisomerase II-associated protein PAT1	--	S	Function unknown	Os01g0769000 [Oryza sativa Japonica Group]
PB.602.3	LOC_Os01g56300.1	--	--	--	K12617|0|osa:4325594|Os01g0769000; K12617 DNA topoisomerase 2-associated protein PAT1 (A)	ko03018:RNA degradation	--	--	Topoisomerase II-associated protein PAT1	--	S	Function unknown	Os01g0769000 [Oryza sativa Japonica Group]
PB.603.1	LOC_Os01g56320.1	[O]	Posttranslational modification, protein turnover, chaperones	Molecular Function: serine-type endopeptidase activity (GO:0004252);; Biological Process: proteolysis (GO:0006508);; Cellular Component: plant-type cell wall (GO:0009505);; Cellular Component: cytoplasmic membrane-bounded vesicle (GO:0016023);; Molecular Function: identical protein binding (GO:0042802);; Biological Process: negative regulation of catalytic activity (GO:0043086);;	--	--	--	--	Subtilase family;; Peptidase inhibitor I9	Subtilisin-like protease (Precursor) GN=At5g67360 OS=Arabidopsis thaliana (Mouse-ear cress) PE=1 SV=1	O	Posttranslational modification, protein turnover, chaperones	Os01g0769200 [Oryza sativa Japonica Group]
PB.604.1	LOC_Os01g56330.1	[RTKL]	--	Molecular Function: protein serine/threonine kinase activity (GO:0004674);; Molecular Function: protein tyrosine kinase activity (GO:0004713);; Molecular Function: ATP binding (GO:0005524);; Biological Process: protein phosphorylation (GO:0006468);; Cellular Component: cytoplasmic membrane-bounded vesicle (GO:0016023);;	--	--	[T]	Signal transduction mechanisms	Carbohydrate-binding protein of the ER;; Protein tyrosine kinase;; Protein kinase domain;; Di-glucose binding within endoplasmic reticulum	Receptor-like protein kinase FERONIA (Precursor) GN=F26O13.190 OS=Arabidopsis thaliana (Mouse-ear cress) PE=1 SV=1	T	Signal transduction mechanisms	Os01g0769700 [Oryza sativa Japonica Group]
PB.604.2	LOC_Os01g56330.1	[RTKL]	--	Molecular Function: protein serine/threonine kinase activity (GO:0004674);; Molecular Function: protein tyrosine kinase activity (GO:0004713);; Molecular Function: ATP binding (GO:0005524);; Biological Process: protein phosphorylation (GO:0006468);; Cellular Component: cytoplasmic membrane-bounded vesicle (GO:0016023);;	--	--	[T]	Signal transduction mechanisms	Carbohydrate-binding protein of the ER;; Protein tyrosine kinase;; Protein kinase domain;; Di-glucose binding within endoplasmic reticulum	Receptor-like protein kinase FERONIA (Precursor) GN=F26O13.190 OS=Arabidopsis thaliana (Mouse-ear cress) PE=1 SV=1	T	Signal transduction mechanisms	Os01g0769700 [Oryza sativa Japonica Group]
PB.604.3	LOC_Os01g56330.1	[RTKL]	--	Molecular Function: protein serine/threonine kinase activity (GO:0004674);; Molecular Function: protein tyrosine kinase activity (GO:0004713);; Molecular Function: ATP binding (GO:0005524);; Biological Process: protein phosphorylation (GO:0006468);; Cellular Component: cytoplasmic membrane-bounded vesicle (GO:0016023);;	--	--	[T]	Signal transduction mechanisms	Carbohydrate-binding protein of the ER;; Protein tyrosine kinase;; Protein kinase domain;; Di-glucose binding within endoplasmic reticulum	Receptor-like protein kinase FERONIA (Precursor) GN=F26O13.190 OS=Arabidopsis thaliana (Mouse-ear cress) PE=1 SV=1	T	Signal transduction mechanisms	Os01g0769700 [Oryza sativa Japonica Group]
PB.605.1	LOC_Os01g56350.2	--	--	Biological Process: cell proliferation (GO:0008283);; Cellular Component: chloroplast (GO:0009507);; Cellular Component: plastid chromosome (GO:0009508);; Biological Process: transcription from plastid promoter (GO:0042793);; Biological Process: positive regulation of transcription, DNA-templated (GO:0045893);;	--	--	--	--	--	--	S	Function unknown	Os01g0769900 [Oryza sativa Japonica Group]
PB.606.1	LOC_Os01g56470.1	--	--	--	--	--	--	--	--	--	S	Function unknown	Os01g0771200 [Oryza sativa Japonica Group]
PB.607.1	LOC_Os01g56580.2	[RTKL]	--	Molecular Function: protein serine/threonine kinase activity (GO:0004674);; Molecular Function: ATP binding (GO:0005524);; Biological Process: protein phosphorylation (GO:0006468);;	--	--	[T]	Signal transduction mechanisms	Protein kinase domain;; Protein tyrosine kinase	Casein kinase I isoform delta-like GN=At4g26100 OS=Arabidopsis thaliana (Mouse-ear cress) PE=2 SV=2	T	Signal transduction mechanisms	Os01g0772600 [Oryza sativa Japonica Group]
PB.608.1	LOC_Os01g56590.1	--	--	Molecular Function: ARF guanyl-nucleotide exchange factor activity (GO:0005086);; Cellular Component: trans-Golgi network (GO:0005802);; Biological Process: intra-Golgi vesicle-mediated transport (GO:0006891);; Biological Process: membrane fusion (GO:0006944);;	--	--	[S]	Function unknown	Guanine nucleotide exchange factor in Golgi transport N-terminal;; Domain of unknown function (DUF1981)	Brefeldin A-inhibited guanine nucleotide-exchange protein 2 GN=BIG2 OS=Arabidopsis thaliana (Mouse-ear cress) PE=2 SV=1	S	Function unknown	hypothetical protein OsI_03914 [Oryza sativa Indica Group]
PB.609.1	LOC_Os01g56600.1	[U]	Intracellular trafficking, secretion, and vesicular transport	Molecular Function: GTPase activity (GO:0003924);; Molecular Function: GTP binding (GO:0005525);; Biological Process: GTP catabolic process (GO:0006184);; Biological Process: SRP-dependent cotranslational protein targeting to membrane (GO:0006614);; Molecular Function: 7S RNA binding (GO:0008312);; Cellular Component: signal recognition particle (GO:0048500);;	K03106|0|osa:4324712|Os01g0772800; K03106 signal recognition particle subunit SRP54 (A)	ko03060:Protein export	[U]	Intracellular trafficking, secretion, and vesicular transport	SRP54-type protein, GTPase domain;; Signal peptide binding domain;; SRP54-type protein, helical bundle domain;; CobW/HypB/UreG, nucleotide-binding domain;; Molybdopterin guanine dinucleotide synthesis protein B	Signal recognition particle 54 kDa protein 2 OS=Solanum lycopersicum (Tomato) PE=2 SV=1	U	Intracellular trafficking, secretion, and vesicular transport	Os01g0772800 [Oryza sativa Japonica Group]
PB.610.1	PB.610.1	--	--	Biological Process: positive regulation of cell proliferation (GO:0008284);;	--	--	[R]	General function prediction only	Dyggve-Melchior-Clausen syndrome protein;; Dyggve-Melchior-Clausen syndrome protein	--	S	Function unknown	hypothetical protein OsJ_03629 [Oryza sativa Japonica Group]
PB.611.1	PB.611.1	--	--	Molecular Function: mannosyl-oligosaccharide 1,2-alpha-mannosidase activity (GO:0004571);; Molecular Function: aminoacyl-tRNA ligase activity (GO:0004812);; Molecular Function: calcium ion binding (GO:0005509);; Cellular Component: mitochondrion (GO:0005739);; Biological Process: protein N-linked glycosylation (GO:0006487);; Cellular Component: membrane (GO:0016020);;	K10085|0|osa:4327149|Os01g0773600; K10085 ER degradation enhancer, mannosidase alpha-like 2 (A)	ko04141:Protein processing in endoplasmic reticulum	[G]	Carbohydrate transport and metabolism	Glycosyl hydrolase family 47;; Glycosyl hydrolase family 47	Probable alpha-mannosidase I MNS4 GN=MNS4 OS=Arabidopsis thaliana (Mouse-ear cress) PE=2 SV=1	O	Posttranslational modification, protein turnover, chaperones	putative aspartyl(D) tRNA Synthetase (89.0 kD)(drs-2C) [Oryza sativa Japonica Group]
PB.611.2	LOC_Os01g56670.1	--	--	Molecular Function: mannosyl-oligosaccharide 1,2-alpha-mannosidase activity (GO:0004571);; Molecular Function: aminoacyl-tRNA ligase activity (GO:0004812);; Molecular Function: calcium ion binding (GO:0005509);; Cellular Component: mitochondrion (GO:0005739);; Biological Process: protein N-linked glycosylation (GO:0006487);; Cellular Component: membrane (GO:0016020);;	K10085|0|osa:4327149|Os01g0773600; K10085 ER degradation enhancer, mannosidase alpha-like 2 (A)	ko04141:Protein processing in endoplasmic reticulum	[G]	Carbohydrate transport and metabolism	Glycosyl hydrolase family 47	Probable alpha-mannosidase I MNS4 GN=MNS4 OS=Arabidopsis thaliana (Mouse-ear cress) PE=2 SV=1	O	Posttranslational modification, protein turnover, chaperones	Os01g0773600 [Oryza sativa Japonica Group]
PB.612.1	PB.612.1	--	--	Molecular Function: protein dimerization activity (GO:0046983);;	--	--	--	--	Protein of unknown function (DUF295);; F-box domain	--	--	--	hypothetical protein [Oryza sativa Japonica Group]
PB.613.1	PB.613.1	--	--	--	--	--	--	--	Zein-binding	--	S	Function unknown	Os01g0775200 [Oryza sativa Japonica Group]
PB.614.1	PB.614.1	--	--	Cellular Component: cytosol (GO:0005829);; Biological Process: vegetative to reproductive phase transition of meristem (GO:0010228);; Biological Process: protein desumoylation (GO:0016926);; Biological Process: hydrogen peroxide biosynthetic process (GO:0050665);;	--	--	[I]	Lipid transport and metabolism	--	--	U	Intracellular trafficking, secretion, and vesicular transport	PREDICTED: conserved oligomeric Golgi complex subunit 1-like [Oryza brachyantha]
PB.615.1	LOC_Os01g56930.1	--	--	Molecular Function: aspartic-type endopeptidase activity (GO:0004190);; Biological Process: proteolysis (GO:0006508);; Cellular Component: plant-type cell wall (GO:0009505);; Cellular Component: cytoplasmic membrane-bounded vesicle (GO:0016023);;	--	--	[O]	Posttranslational modification, protein turnover, chaperones	Xylanase inhibitor N-terminal;; Eukaryotic aspartyl protease;; Xylanase inhibitor C-terminal	Aspartic proteinase-like protein 2 (Precursor) GN=At1g65240 OS=Arabidopsis thaliana (Mouse-ear cress) PE=1 SV=2	O	Posttranslational modification, protein turnover, chaperones	putative aspartic proteinase nepenthesin II [Oryza sativa Japonica Group]
PB.616.1	PB.616.1	[L]	Replication, recombination and repair	Molecular Function: DNA binding (GO:0003677);; Molecular Function: endonuclease activity (GO:0004519);; Molecular Function: exonuclease activity (GO:0004527);; Cellular Component: nucleus (GO:0005634);; Biological Process: DNA repair (GO:0006281);; Biological Process: sister chromatid cohesion (GO:0007062);; Biological Process: chromatin silencing by small RNA (GO:0031048);; Biological Process: m…	K10746|0|osa:4327899|Os01g0777300; K10746 exonuclease 1 [EC:3.1.-.-] (A)	ko03430:Mismatch repair	[L]	Replication, recombination and repair	XPG I-region;; XPG N-terminal domain	Exonuclease 1 GN=P0413G02.29 OS=Oryza sativa subsp. japonica (Rice) PE=2 SV=1	L	Replication, recombination and repair	Os01g0777300 [Oryza sativa Japonica Group]
PB.616.2	PB.616.2	[L]	Replication, recombination and repair	Molecular Function: DNA binding (GO:0003677);; Molecular Function: endonuclease activity (GO:0004519);; Molecular Function: exonuclease activity (GO:0004527);; Cellular Component: nucleus (GO:0005634);; Biological Process: DNA repair (GO:0006281);; Biological Process: sister chromatid cohesion (GO:0007062);; Biological Process: chromatin silencing by small RNA (GO:0031048);; Biological Process: m…	K10746|0|osa:4327899|Os01g0777300; K10746 exonuclease 1 [EC:3.1.-.-] (A)	ko03430:Mismatch repair	[L]	Replication, recombination and repair	XPG I-region;; XPG N-terminal domain	Exonuclease 1 GN=P0413G02.29 OS=Oryza sativa subsp. japonica (Rice) PE=2 SV=1	L	Replication, recombination and repair	Os01g0777300 [Oryza sativa Japonica Group]
PB.617.1	LOC_Os01g56969.1	--	--	Molecular Function: nucleotide binding (GO:0000166);; Molecular Function: nucleic acid binding (GO:0003676);; Molecular Function: sequence-specific DNA binding transcription factor activity (GO:0003700);; Cellular Component: mitochondrion (GO:0005739);; Biological Process: regulation of transcription, DNA-templated (GO:0006355);;	--	--	[K]	Transcription	--	Uncharacterized protein At1g27050 GN=At1g27050 OS=Arabidopsis thaliana (Mouse-ear cress) PE=2 SV=1	K	Transcription	hypothetical protein OsI_03951 [Oryza sativa Indica Group]
PB.619.1	LOC_Os01g57066.1	--	--	Cellular Component: integral component of membrane (GO:0016021);;	--	--	[R]	General function prediction only	SNARE associated Golgi protein	Vacuole membrane protein KMS1 {ECO:0000303|PubMed:21294794} OS=Arabidopsis thaliana (Mouse-ear cress) PE=1 SV=1	S	Function unknown	Os01g0778700 [Oryza sativa Japonica Group]
PB.620.1	LOC_Os01g57073.1	--	--	Molecular Function: metalloendopeptidase activity (GO:0004222);; Biological Process: proteolysis (GO:0006508);; Molecular Function: metal ion binding (GO:0046872);;	K01408|0|osa:4326432|Os01g0778800; K01408 insulysin [EC:3.4.24.56] (A)	--	[O]	Posttranslational modification, protein turnover, chaperones	Insulinase (Peptidase family M16);; Peptidase M16 inactive domain	Zinc-metallopeptidase, peroxisomal GN=PXM16 OS=Arabidopsis thaliana (Mouse-ear cress) PE=2 SV=1	O	Posttranslational modification, protein turnover, chaperones	Os01g0778800 [Oryza sativa Japonica Group]
PB.621.1	LOC_Os01g57100.1	[RTKL]	--	Molecular Function: protein serine/threonine kinase activity (GO:0004674);; Molecular Function: ATP binding (GO:0005524);; Biological Process: protein phosphorylation (GO:0006468);; Cellular Component: membrane (GO:0016020);; Cellular Component: cytoplasmic membrane-bounded vesicle (GO:0016023);; Molecular Function: carbohydrate binding (GO:0030246);;	--	--	--	--	Legume lectin domain;; Protein kinase domain;; Protein tyrosine kinase	L-type lectin-domain containing receptor kinase IX.1 (Precursor) GN=LECRK91 OS=Arabidopsis thaliana (Mouse-ear cress) PE=2 SV=1	T	Signal transduction mechanisms	Os01g0779300 [Oryza sativa Japonica Group]
PB.622.1	LOC_Os01g57210.1	[T]	Signal transduction mechanisms	Molecular Function: microtubule binding (GO:0008017);; Cellular Component: katanin complex (GO:0008352);; Biological Process: microtubule severing (GO:0051013);;	K18643|0|osa:4327835|Os01g0780400; K18643 katanin p80 WD40 repeat-containing subunit B1 (A)	--	[D]	Cell cycle control, cell division, chromosome partitioning	WD domain, G-beta repeat;; con80 domain of Katanin;; Eukaryotic translation initiation factor eIF2A	Katanin p80 WD40 repeat-containing subunit B1 homolog {ECO:0000255|HAMAP-Rule:MF_03022} GN=At5g23430 OS=Arabidopsis thaliana (Mouse-ear cress) PE=2 SV=3	S	Function unknown	Os01g0780400 [Oryza sativa Japonica Group]
PB.623.1	LOC_Os01g57220.1	--	--	Cellular Component: plasma membrane (GO:0005886);; Biological Process: protein transport (GO:0015031);; Cellular Component: integral component of membrane (GO:0016021);; Cellular Component: transport vesicle membrane (GO:0030658);;	--	--	[U]	Intracellular trafficking, secretion, and vesicular transport	SCAMP family	Secretory carrier-associated membrane protein 2 OS=Oryza sativa subsp. japonica (Rice) PE=2 SV=1	U	Intracellular trafficking, secretion, and vesicular transport	Os01g0780500 [Oryza sativa Japonica Group]
PB.624.1	LOC_Os01g57250.1	--	--	Cellular Component: mitochondrion (GO:0005739);;	--	--	--	--	Protein of unknown function (DUF3778)	--	--	--	Os01g0780900 [Oryza sativa Japonica Group]
PB.625.1	LOC_Os01g57260.1	--	--	--	K12184|2.35695e-136|osa:4327840|Os01g0781000; K12184 ESCRT-I complex subunit VPS28 (A)	ko04144:Endocytosis	[U]	Intracellular trafficking, secretion, and vesicular transport	VPS28 protein	Vacuolar protein sorting-associated protein 28 homolog 1 OS=Arabidopsis thaliana (Mouse-ear cress) PE=1 SV=1	U	Intracellular trafficking, secretion, and vesicular transport	Os01g0781000 [Oryza sativa Japonica Group]
PB.626.1	PB.626.1	--	--	Biological Process: defense response (GO:0006952);; Biological Process: isoprenoid biosynthetic process (GO:0008299);; Cellular Component: membrane (GO:0016020);; Molecular Function: oxidoreductase activity (GO:0016491);; Molecular Function: ADP binding (GO:0043531);; Biological Process: oxidation-reduction process (GO:0055114);;	--	--	--	--	--	--	--	--	Os01g0781600 [Oryza sativa Japonica Group]
PB.627.1	LOC_Os01g57460.1	[P]	Inorganic ion transport and metabolism	Molecular Function: ferroxidase activity (GO:0004322);; Cellular Component: mitochondrion (GO:0005739);; Molecular Function: ferric iron binding (GO:0008199);; Biological Process: aerobic respiration (GO:0009060);; Biological Process: iron-sulfur cluster assembly (GO:0016226);; Biological Process: response to hydrogen peroxide (GO:0042542);; Biological Process: cotyledon development (GO:0048825);…	--	--	[P]	Inorganic ion transport and metabolism	Frataxin-like domain	Frataxin, mitochondrial (Precursor) GN=FH OS=Arabidopsis thaliana (Mouse-ear cress) PE=2 SV=2	P	Inorganic ion transport and metabolism	putative frataxin [Oryza sativa Japonica Group]
PB.628.1	PB.628.1	[RTKL]	--	Molecular Function: protein serine/threonine kinase activity (GO:0004674);; Molecular Function: ATP binding (GO:0005524);; Biological Process: protein phosphorylation (GO:0006468);; Cellular Component: cytoplasmic membrane-bounded vesicle (GO:0016023);; Biological Process: recognition of pollen (GO:0048544);;	--	--	--	--	Protein tyrosine kinase;; Protein kinase domain;; D-mannose binding lectin;; S-locus glycoprotein family;; PAN-like domain	G-type lectin S-receptor-like serine/threonine-protein kinase B120 (Precursor) GN=B120 OS=Arabidopsis thaliana (Mouse-ear cress) PE=2 SV=1	T	Signal transduction mechanisms	Os01g0783800 [Oryza sativa Japonica Group]
PB.629.1	LOC_Os01g57550.1	--	--	--	--	--	--	--	Stf0 sulphotransferase	--	S	Function unknown	hypothetical protein OsI_04009 [Oryza sativa Indica Group]
PB.630.1	LOC_Os01g57570.1	[R]	General function prediction only	Cellular Component: vacuole (GO:0005773);; Cellular Component: plasma membrane (GO:0005886);; Biological Process: response to auxin (GO:0009733);; Molecular Function: FMN binding (GO:0010181);; Molecular Function: oxidoreductase activity, acting on NAD(P)H, quinone or similar compound as acceptor (GO:0016655);; Biological Process: negative regulation of transcription, DNA-templated (GO:0045892);;…	K03809|5.51272e-135|osa:4327039|Os01g0784800; K03809 Trp repressor binding protein (A)	--	[R]	General function prediction only	NADPH-dependent FMN reductase;; Flavodoxin;; Flavodoxin-like fold	NAD(P)H dehydrogenase (quinone) FQR1 {ECO:0000305} OS=Arabidopsis thaliana (Mouse-ear cress) PE=1 SV=1	S	Function unknown	Os01g0784800 [Oryza sativa Japonica Group]
PB.631.1	LOC_Os01g57610.1	--	--	Biological Process: response to light stimulus (GO:0009416);; Cellular Component: plastid (GO:0009536);; Biological Process: response to auxin (GO:0009733);; Molecular Function: ligase activity (GO:0016874);;	K14487|0|osa:4327043|Os01g0785400; K14487 auxin responsive GH3 gene family (A)	ko04075:Plant hormone signal transduction	--	--	GH3 auxin-responsive promoter	Probable indole-3-acetic acid-amido synthetase GH3.1 GN=B1070A12.26 OS=Oryza sativa subsp. japonica (Rice) PE=2 SV=1	S	Function unknown	Os01g0785400 [Oryza sativa Japonica Group]
PB.632.1	LOC_Os01g57630.2	--	--	--	--	--	[R]	General function prediction only	PPR repeat family;; PPR repeat;; PPR repeat;; Pentatricopeptide repeat domain;; Tetratricopeptide repeat;; Tetratricopeptide repeat	Pentatricopeptide repeat-containing protein At1g55890, mitochondrial (Precursor) GN=At1g55890 OS=Arabidopsis thaliana (Mouse-ear cress) PE=2 SV=1	S	Function unknown	Os01g0785700 [Oryza sativa Japonica Group]
PB.633.1	LOC_Os01g57740.1	--	--	--	--	--	--	--	--	--	S	Function unknown	Os01g0787400 [Oryza sativa Japonica Group]
PB.634.1	LOC_Os01g57770.1	[R]	General function prediction only	Molecular Function: catalytic activity (GO:0003824);; Biological Process: lipid metabolic process (GO:0006629);;	--	--	--	--	Alpha/beta hydrolase family;; Alpha/beta hydrolase family;; alpha/beta hydrolase fold	Salicylic acid-binding protein 2 GN=SABP2 OS=Nicotiana tabacum (Common tobacco) PE=1 SV=1	S	Function unknown	Os01g0787600 [Oryza sativa Japonica Group]
PB.635.1	LOC_Os01g57942.1	[C]	Energy production and conversion	Molecular Function: iron ion binding (GO:0005506);; Cellular Component: chloroplast thylakoid membrane (GO:0009535);; Biological Process: photosynthesis (GO:0015979);; Cellular Component: integral component of membrane (GO:0016021);; Molecular Function: oxidoreductase activity (GO:0016491);; Molecular Function: heme binding (GO:0020037);; Biological Process: respiratory electron transport chain (…	K02635|2.15985e-166|sita:19526818|petB, W841_p034; cytochrome b6; K02635 cytochrome b6 (A)	ko00195:Photosynthesis	[C]	Energy production and conversion	Cytochrome b(N-terminal)/b6/petB;; Cytochrome b(N-terminal)/b6/petB	Cytochrome b6 {ECO:0000255|HAMAP-Rule:MF_00633} OS=Triticum aestivum (Wheat) PE=2 SV=1	C	Energy production and conversion	cytochrome b6 (chloroplast) [Oryza rufipogon]
PB.636.1	PB.636.1	--	--	Molecular Function: translation initiation factor activity (GO:0003743);; Biological Process: translational initiation (GO:0006413);; Cellular Component: chloroplast (GO:0009507);;	--	--	--	--	--	--	S	Function unknown	hypothetical protein M569_00251, partial [Genlisea aurea]
PB.637.1	PB.637.1	[C]	Energy production and conversion	Molecular Function: iron ion binding (GO:0005506);; Cellular Component: plasma membrane (GO:0005886);; Biological Process: transport (GO:0006810);; Molecular Function: NADH dehydrogenase (ubiquinone) activity (GO:0008137);; Cellular Component: chloroplast thylakoid membrane (GO:0009535);; Biological Process: photosynthesis, light reaction (GO:0019684);; Molecular Function: quinone binding (GO:004…	K05582|7.86522e-108|osa:3131459|ndhK, OrsajCp029; NADH dehydrogenase 27 kDa subunit; K05582 NAD(P)H-quinone oxidoreductase subunit K [EC:1.6.5.3] (A)	ko00190:Oxidative phosphorylation	[C]	Energy production and conversion	--	NAD(P)H-quinone oxidoreductase subunit K, chloroplastic {ECO:0000255|HAMAP-Rule:MF_01356} OS=Triticum aestivum (Wheat) PE=3 SV=2	C	Energy production and conversion	NADH-plastoquinone oxidoreductase subunit K [Potamophila parviflora]
PB.638.1	LOC_Os01g57968.1	--	--	Cellular Component: mitochondrion (GO:0005739);; Molecular Function: hydrolase activity (GO:0016787);;	--	--	--	--	--	--	S	Function unknown	chloroplast hypothetical protein [Zea mays subsp. mays]
PB.639.1	LOC_Os01g58020.1	[G]	Carbohydrate transport and metabolism	Molecular Function: magnesium ion binding (GO:0000287);; Molecular Function: monooxygenase activity (GO:0004497);; Cellular Component: chloroplast ribulose bisphosphate carboxylase complex (GO:0009573);; Biological Process: photorespiration (GO:0009853);; Molecular Function: ribulose-bisphosphate carboxylase activity (GO:0016984);; Biological Process: reductive pentose-phosphate cycle (GO:0019253…	K01601|2.91e-121|osa:3131463|rbcL, OrsajCp033; RuBisCO large subunit; K01601 ribulose-bisphosphate carboxylase large chain [EC:4.1.1.39] (A)	ko00630:Glyoxylate and dicarboxylate metabolism;ko00710:Carbon fixation in photosynthetic organisms;ko01200:Carbon metabolism	--	--	Ribulose bisphosphate carboxylase large chain, N-terminal domain;; Ribulose bisphosphate carboxylase large chain, catalytic domain	Ribulose bisphosphate carboxylase large chain (Precursor) GN=rbcL OS=Oryza sativa subsp. japonica (Rice) PE=1 SV=1	G	Carbohydrate transport and metabolism	ribulose-1,5-bisphosphate carboxylase/oxygenase large subunit, partial (chloroplast), partial (chloroplast) [Leersia japonica]
PB.640.1	PB.640.1	[C]	Energy production and conversion	Cellular Component: plasma membrane (GO:0005886);; Biological Process: mitochondrial electron transport, NADH to ubiquinone (GO:0006120);; Molecular Function: NADH dehydrogenase (ubiquinone) activity (GO:0008137);; Cellular Component: chloroplast thylakoid membrane (GO:0009535);; Cellular Component: integral component of membrane (GO:0016021);; Cellular Component: cytoplasmic membrane-bounded ves…	K05574|1.01021e-34|osa:3131460|ndhC, ndh3, OrsajCp030; ndhC; K05574 NAD(P)H-quinone oxidoreductase subunit 3 [EC:1.6.5.3] (A)	ko00190:Oxidative phosphorylation	[C]	Energy production and conversion	NADH-ubiquinone/plastoquinone oxidoreductase, chain 3	NAD(P)H-quinone oxidoreductase subunit 3, chloroplastic {ECO:0000255|HAMAP-Rule:MF_01394} OS=Oryza sativa subsp. japonica (Rice) PE=3 SV=1	C	Energy production and conversion	NADH dehydrogenase subunit 3 [Oryza sativa Japonica Group]
PB.641.1	PB.641.1	[J]	Translation, ribosomal structure and biogenesis	Molecular Function: structural constituent of ribosome (GO:0003735);; Cellular Component: cell wall (GO:0005618);; Cellular Component: nucleolus (GO:0005730);; Cellular Component: mitochondrial small ribosomal subunit (GO:0005763);; Cellular Component: plasma membrane (GO:0005886);; Biological Process: rRNA processing (GO:0006364);; Biological Process: translation (GO:0006412);; Cellular Componen…	K02992|9.82176e-67|zma:845239|rps7, ZemaCp100; 30S ribosomal protein S7; K02992 small subunit ribosomal protein S7 (A)	ko03010:Ribosome	[J]	Translation, ribosomal structure and biogenesis	Ribosomal protein S7p/S5e	30S ribosomal protein S7, chloroplastic GN=rps7-B OS=Sorghum bicolor (Sorghum) PE=3 SV=1	J	Translation, ribosomal structure and biogenesis	ribosomal protein S7 (chloroplast) [Hordeum vulgare subsp. spontaneum]
PB.642.1	LOC_Os01g58038.1	--	--	Cellular Component: chloroplast thylakoid membrane (GO:0009535);; Cellular Component: photosystem II reaction center (GO:0009539);; Cellular Component: integral component of membrane (GO:0016021);; Cellular Component: cytoplasmic membrane-bounded vesicle (GO:0016023);; Biological Process: secretion by cell (GO:0032940);; Biological Process: photosystem II stabilization (GO:0042549);;	--	--	--	--	YCF9	Photosystem II reaction center protein Z {ECO:0000255|HAMAP-Rule:MF_00644} GN=LOC_Osp1g00190 OS=Oryza sativa subsp. japonica (Rice) PE=3 SV=1	--	--	putative Hooker&apos;s evening primrose chloroplast hypothetical 8.4 kDa protein in ycf9-trnS intergenic region (ORF75) [Oryza sativa Japonica Group]
PB.643.1	LOC_Os01g58049.1	--	--	Cellular Component: photosystem I (GO:0009522);; Cellular Component: chloroplast thylakoid membrane (GO:0009535);; Biological Process: photosynthesis (GO:0015979);; Cellular Component: integral component of membrane (GO:0016021);;	--	--	--	--	Ycf4	Photosystem I assembly protein Ycf4 {ECO:0000255|HAMAP-Rule:MF_00437} GN=LOC_Osp1g00460 OS=Oryza sativa subsp. japonica (Rice) PE=3 SV=1	--	--	photosystem I assembly protein ycf4 [Oryza australiensis]
PB.644.1	PB.644.1	--	--	Cellular Component: ribosome (GO:0005840);; Biological Process: lipid transport (GO:0006869);; Molecular Function: lipid binding (GO:0008289);; Cellular Component: plastid (GO:0009536);; Molecular Function: hydrolase activity (GO:0016787);;	--	--	--	--	--	--	S	Function unknown	hypothetical protein CH29B_p069 (chloroplast) (chloroplast) [Chlorella sp. ArM0029B]
PB.645.1	LOC_Os01g58194.1	--	--	Molecular Function: isomerase activity (GO:0016853);; Molecular Function: protein-disulfide reductase activity (GO:0047134);; Biological Process: oxidation-reduction process (GO:0055114);;	--	--	[R]	General function prediction only	Thioredoxin-like;; AhpC/TSA family;; Thioredoxin-like domain;; Thioredoxin;; Redoxin;; SCO1/SenC	Probable nucleoredoxin 2 OS=Oryza sativa subsp. japonica (Rice) PE=2 SV=1	O	Posttranslational modification, protein turnover, chaperones	Os01g0794400 [Oryza sativa Japonica Group]
PB.646.1	LOC_Os01g58380.1	[I]	Lipid transport and metabolism	Molecular Function: 3-hydroxyacyl-CoA dehydrogenase activity (GO:0003857);; Cellular Component: peroxisome (GO:0005777);; Biological Process: fatty acid metabolic process (GO:0006631);; Biological Process: membrane fusion (GO:0006944);; Molecular Function: 3-hydroxybutyryl-CoA dehydrogenase activity (GO:0008691);; Biological Process: photorespiration (GO:0009853);; Biological Process: response to…	K00074|0|osa:4325632|Os01g0796400; K00074 3-hydroxybutyryl-CoA dehydrogenase [EC:1.1.1.157] (A)	ko00360:Phenylalanine metabolism;ko00650:Butanoate metabolism	[I]	Lipid transport and metabolism	3-hydroxyacyl-CoA dehydrogenase, NAD binding domain;; 3-hydroxyacyl-CoA dehydrogenase, C-terminal domain;; NAD binding domain of 6-phosphogluconate dehydrogenase	3-hydroxyacyl-CoA dehydrogenase GN=AIM1 OS=Arabidopsis thaliana (Mouse-ear cress) PE=1 SV=1	I	Lipid transport and metabolism	Os01g0796400 [Oryza sativa Japonica Group]
PB.647.1	LOC_Os01g58420.1	--	--	Molecular Function: DNA binding (GO:0003677);; Molecular Function: sequence-specific DNA binding transcription factor activity (GO:0003700);; Cellular Component: nucleus (GO:0005634);; Biological Process: regulation of transcription, DNA-templated (GO:0006355);; Cellular Component: plastid (GO:0009536);;	--	--	--	--	AP2 domain	Ethylene-responsive transcription factor 4 GN=At3g15210 OS=Arabidopsis thaliana (Mouse-ear cress) PE=1 SV=1	K	Transcription	Os01g0797600 [Oryza sativa Japonica Group]
PB.648.1	LOC_Os01g58470.1	--	--	Biological Process: response to water deprivation (GO:0009414);; Cellular Component: chloroplast thylakoid membrane (GO:0009535);; Biological Process: chloroplast organization (GO:0009658);; Biological Process: heat acclimation (GO:0010286);; Biological Process: hyperosmotic salinity response (GO:0042538);; Biological Process: photosystem I assembly (GO:0048564);; Biological Process: response to …	--	--	--	--	--	--	S	Function unknown	hypothetical protein OsI_04075 [Oryza sativa Indica Group]
PB.649.1	LOC_Os01g58510.1	--	--	Biological Process: defense response (GO:0006952);; Molecular Function: ADP binding (GO:0043531);;	--	--	--	--	NB-ARC domain	Probable disease resistance protein At5g45490 GN=At5g45490 OS=Arabidopsis thaliana (Mouse-ear cress) PE=2 SV=1	S	Function unknown	blight resistance protein RGA3-like [Oryza sativa Japonica Group]
PB.650.1	LOC_Os01g58550.1	[L]	Replication, recombination and repair	Biological Process: base-excision repair (GO:0006284);; Molecular Function: DNA-3-methyladenine glycosylase activity (GO:0008725);;	K01246|0|osa:4327631|Os01g0799500; K01246 DNA-3-methyladenine glycosylase I [EC:3.2.2.20] (A)	ko03410:Base excision repair	--	--	Methyladenine glycosylase	--	L	Replication, recombination and repair	Os01g0799500 [Oryza sativa Japonica Group]
PB.651.1	LOC_Os01g58580.1	--	--	Molecular Function: cysteine-type endopeptidase activity (GO:0004197);; Cellular Component: plasma membrane (GO:0005886);; Biological Process: proteolysis (GO:0006508);; Biological Process: apoptotic process (GO:0006917);; Cellular Component: chloroplast (GO:0009507);; Biological Process: response to UV-C (GO:0010225);; Biological Process: hydrogen peroxide-mediated programmed cell death (GO:0010…	--	--	[DO]	--	Caspase domain	Metacaspase-5 GN=YUP8H12R.5 OS=Arabidopsis thaliana (Mouse-ear cress) PE=1 SV=1	O	Posttranslational modification, protein turnover, chaperones	Os01g0799900 [Oryza sativa Japonica Group]
PB.652.1	PB.652.1	[R]	General function prediction only	Molecular Function: acid phosphatase activity (GO:0003993);; Molecular Function: protein serine/threonine phosphatase activity (GO:0004722);; Cellular Component: mitochondrion (GO:0005739);; Biological Process: protein dephosphorylation (GO:0006470);; Cellular Component: protein serine/threonine phosphatase complex (GO:0008287);; Molecular Function: metal ion binding (GO:0046872);;	--	--	[G]	Carbohydrate transport and metabolism	PhoD-like phosphatase;; Calcineurin-like phosphoesterase;; Iron/zinc purple acid phosphatase-like protein C;; Calcineurin-like phosphoesterase	Probable inactive purple acid phosphatase 27 (Precursor) GN=PAP27 OS=Arabidopsis thaliana (Mouse-ear cress) PE=2 SV=1	S	Function unknown	Os01g0800500 [Oryza sativa Japonica Group]
PB.653.1	LOC_Os01g58680.1	[L]	Replication, recombination and repair	Molecular Function: DNA binding (GO:0003677);; Molecular Function: DNA-(apurinic or apyrimidinic site) lyase activity (GO:0003906);; Molecular Function: endonuclease activity (GO:0004519);; Cellular Component: mitochondrion (GO:0005739);; Biological Process: DNA repair (GO:0006281);; Cellular Component: chloroplast nucleoid (GO:0042644);; Biological Process: nucleic acid phosphodiester bond hydro…	K01142|0|osa:4327960|Os01g0801000; K01142 exodeoxyribonuclease III [EC:3.1.11.2] (A)	ko03410:Base excision repair	[L]	Replication, recombination and repair	Endonuclease/Exonuclease/phosphatase family;; SAP domain;; Endonuclease-reverse transcriptase	Apurinic endonuclease-redox protein GN=T26J13.5 OS=Arabidopsis thaliana (Mouse-ear cress) PE=2 SV=2	L	Replication, recombination and repair	Os01g0801000 [Oryza sativa Japonica Group]
PB.654.1	LOC_Os01g58780.1	--	--	Cellular Component: mitochondrion (GO:0005739);; Molecular Function: zinc ion binding (GO:0008270);; Cellular Component: plastid (GO:0009536);;	K11982|0|osa:4327967|Os01g0802000; K11982 E3 ubiquitin-protein ligase RNF115/126 [EC:6.3.2.19] (A)	--	[O]	Posttranslational modification, protein turnover, chaperones	Ring finger domain;; zinc-finger;; Zinc finger, C3HC4 type (RING finger)	E3 ubiquitin-protein ligase RING1 GN=RING1 OS=Gossypium hirsutum (Upland cotton) PE=1 SV=1	O	Posttranslational modification, protein turnover, chaperones	hypothetical protein OsJ_01814 [Oryza sativa Japonica Group]
PB.655.1	LOC_Os01g58790.1	[I]	Lipid transport and metabolism	Molecular Function: ATP binding (GO:0005524);; Biological Process: heme biosynthetic process (GO:0006783);; Cellular Component: chromoplast (GO:0009509);; Cellular Component: chloroplast stroma (GO:0009570);; Biological Process: response to blue light (GO:0009637);; Biological Process: response to high light intensity (GO:0009644);; Biological Process: response to sucrose (GO:0009744);; Biologica…	K00919|0|osa:4327968|Os01g0802100; K00919 4-diphosphocytidyl-2-C-methyl-D-erythritol kinase [EC:2.7.1.148] (A)	ko00900:Terpenoid backbone biosynthesis	--	--	GHMP kinases N terminal domain;; GHMP kinases C terminal	4-diphosphocytidyl-2-C-methyl-D-erythritol kinase, chloroplastic (Precursor) OS=Oryza sativa subsp. japonica (Rice) PE=2 SV=1	I	Lipid transport and metabolism	Os01g0802100 [Oryza sativa Japonica Group]
PB.656.1	LOC_Os01g58890.1	--	--	Molecular Function: cysteine-type endopeptidase inhibitor activity (GO:0004869);; Cellular Component: extracellular region (GO:0005576);; Cellular Component: plasma membrane (GO:0005886);; Biological Process: proteolysis (GO:0006508);; Biological Process: defense response (GO:0006952);; Molecular Function: peptidase activity (GO:0008233);; Biological Process: response to wounding (GO:0009611);; B…	--	--	--	--	Cystatin domain	Cysteine proteinase inhibitor 1 (Precursor) OS=Oryza sativa subsp. japonica (Rice) PE=1 SV=2	O	Posttranslational modification, protein turnover, chaperones	Os01g0803200 [Oryza sativa Japonica Group]
PB.657.1	LOC_Os01g59000.1	--	--	Molecular Function: monooxygenase activity (GO:0004497);; Molecular Function: iron ion binding (GO:0005506);; Molecular Function: electron carrier activity (GO:0009055);; Cellular Component: cytoplasmic membrane-bounded vesicle (GO:0016023);; Molecular Function: oxidoreductase activity, acting on paired donors, with incorporation or reduction of molecular oxygen (GO:0016705);; Molecular Function:…	--	--	[QI]	--	Cytochrome P450	Cytochrome P450 94A2 GN=CYP94A2 OS=Vicia sativa (Spring vetch) PE=2 SV=1	Q	Secondary metabolites biosynthesis, transport and catabolism	putative cytochrome P450-dependent fatty acid hydroxylase [Oryza sativa Japonica Group]
PB.658.1	LOC_Os01g59020.1	--	--	Molecular Function: monooxygenase activity (GO:0004497);; Molecular Function: iron ion binding (GO:0005506);; Molecular Function: electron carrier activity (GO:0009055);; Cellular Component: cytoplasmic membrane-bounded vesicle (GO:0016023);; Molecular Function: oxidoreductase activity, acting on paired donors, with incorporation or reduction of molecular oxygen (GO:0016705);; Molecular Function:…	--	--	[QI]	--	Cytochrome P450	Cytochrome P450 94A1 GN=CYP94A1 OS=Vicia sativa (Spring vetch) PE=2 SV=2	Q	Secondary metabolites biosynthesis, transport and catabolism	Os01g0804400 [Oryza sativa Japonica Group]
PB.659.1	LOC_Os01g59070.1	--	--	--	--	--	--	--	--	--	S	Function unknown	hypothetical protein OsJ_03795 [Oryza sativa Japonica Group]
PB.660.1	LOC_Os01g59090.1	--	--	Molecular Function: calcium ion binding (GO:0005509);; Cellular Component: chloroplast thylakoid lumen (GO:0009543);; Cellular Component: chloroplast stroma (GO:0009570);; Cellular Component: photosystem II oxygen evolving complex (GO:0009654);; Biological Process: leaf morphogenesis (GO:0009965);; Biological Process: thylakoid membrane organization (GO:0010027);; Biological Process: photosynthes…	--	--	--	--	PsbP	PsbP domain-containing protein 6, chloroplastic (Precursor) GN=PPD6 OS=Arabidopsis thaliana (Mouse-ear cress) PE=1 SV=1	S	Function unknown	Os01g0805300 [Oryza sativa Japonica Group]
PB.661.1	LOC_Os01g59100.1	--	--	Biological Process: metabolic process (GO:0008152);; Cellular Component: cytoplasmic membrane-bounded vesicle (GO:0016023);; Molecular Function: transferase activity, transferring hexosyl groups (GO:0016758);;	--	--	[GC]	--	UDP-glucoronosyl and UDP-glucosyl transferase	UDP-glycosyltransferase 87A1 GN=UGT87A1 OS=Arabidopsis thaliana (Mouse-ear cress) PE=2 SV=1	S	Function unknown	Os01g0805400 [Oryza sativa Japonica Group]
PB.662.1	LOC_Os01g59150.1	[Z]	Cytoskeleton	Molecular Function: GTPase activity (GO:0003924);; Molecular Function: structural constituent of cytoskeleton (GO:0005200);; Molecular Function: GTP binding (GO:0005525);; Cellular Component: microtubule (GO:0005874);; Cellular Component: plasma membrane (GO:0005886);; Biological Process: GTP catabolic process (GO:0006184);; Biological Process: microtubule-based movement (GO:0007018);; Biological…	K07375|0|zma:100381281|uncharacterized LOC100381281; K07375 tubulin beta (A)	ko04145:Phagosome	[Z]	Cytoskeleton	Tubulin/FtsZ family, GTPase domain;; Tubulin C-terminal domain	Tubulin beta-4 chain OS=Oryza sativa subsp. japonica (Rice) PE=2 SV=1	Z	Cytoskeleton	uncharacterized protein LOC100381281 [Zea mays]
PB.662.2	LOC_Os01g59150.1	[Z]	Cytoskeleton	Molecular Function: GTPase activity (GO:0003924);; Molecular Function: structural constituent of cytoskeleton (GO:0005200);; Molecular Function: GTP binding (GO:0005525);; Cellular Component: microtubule (GO:0005874);; Cellular Component: plasma membrane (GO:0005886);; Biological Process: GTP catabolic process (GO:0006184);; Biological Process: microtubule-based movement (GO:0007018);; Biological…	K07375|0|zma:100381281|uncharacterized LOC100381281; K07375 tubulin beta (A)	ko04145:Phagosome	[Z]	Cytoskeleton	Tubulin/FtsZ family, GTPase domain;; Tubulin C-terminal domain	Tubulin beta-4 chain OS=Oryza sativa subsp. japonica (Rice) PE=2 SV=1	Z	Cytoskeleton	uncharacterized protein LOC100381281 [Zea mays]
PB.662.3	LOC_Os01g59150.1	[Z]	Cytoskeleton	Molecular Function: GTPase activity (GO:0003924);; Molecular Function: structural constituent of cytoskeleton (GO:0005200);; Molecular Function: GTP binding (GO:0005525);; Cellular Component: microtubule (GO:0005874);; Cellular Component: plasma membrane (GO:0005886);; Biological Process: GTP catabolic process (GO:0006184);; Biological Process: microtubule-based movement (GO:0007018);; Biological…	K07375|0|zma:100381281|uncharacterized LOC100381281; K07375 tubulin beta (A)	ko04145:Phagosome	[Z]	Cytoskeleton	Tubulin/FtsZ family, GTPase domain;; Tubulin C-terminal domain	Tubulin beta-4 chain OS=Oryza sativa subsp. japonica (Rice) PE=2 SV=1	Z	Cytoskeleton	uncharacterized protein LOC100381281 [Zea mays]
[truncated: 8,202 more rows]

## Sheet: F02
Table S1 Functional annotation of transcripts
group_ID	Final_ID	COG_class	COG_class_annotation	GO_annotation	KEGG_annotation	KEGG_pathway	KOG_class	KOG_class_annotation	Pfam_annotation	Swissprot_annotation	eggNOG_class	eggNOG_class_annotation	nr_annotation
[truncated: 9,609 more rows]

## Sheet: F03
Table S1 Functional annotation of transcripts
group_ID	Final_ID	COG_class	COG_class_annotation	GO_annotation	KEGG_annotation	KEGG_pathway	KOG_class	KOG_class_annotation	Pfam_annotation	Swissprot_annotation	eggNOG_class	eggNOG_class_annotation	nr_annotation
[truncated: 10,118 more rows]
