# Supplementary material for: Full-length transcriptome reconstruction reveals genetic differences in hybrids of Oryza sativa and Oryza punctata with different ploidy and genome compositions
Source: BMC Plant Biol. 2022 Mar 21;22:131. doi: 10.1186/s12870-022-03502-2 (PMC8935693; doi:10.1186/s12870-022-03502-2)
Supplement: Supplementary file 3 — Additional file 3: Table S2. Splice junctions and AS modes with different ploidy levels. [file 12870_2022_3502_MOESM3_ESM.xlsx]

## Sheet: F01
Table S2 Splice junctions and AS modes with different ploidy levels
Chrom	AS_event	Event_start	Event_end	Strand	Gene_location	Transcript_id
Chr1	Alternative 3' splice site	149101	149450	+	Chr1:148070-150574W	PB.8.2,PB.8.1
Chr1	Alternative 3' splice site	2059870	2059873	+	Chr1:2059309-2062293W	PB.76.1/PB.76.3,PB.76.2
Chr1	Intron retention	2061208	2061303	+	Chr1:2059309-2062293W	PB.76.1,PB.76.2/PB.76.3
Chr1	Alternative 5' splice site	4729783	4729798	+	Chr1:4726723-4731192W	PB.165.2,PB.165.1
Chr1	Alternative 5' splice site	6268295	6268346	+	Chr1:6267440-6270785W	PB.205.2,PB.205.1
Chr1	Intron retention	6320295	6320392	+	Chr1:6319273-6322328W	PB.207.3,PB.207.1/PB.207.2
Chr1	Alternative 3' splice site	7252101	7252128	+	Chr1:7249818-7253754W	PB.230.2,PB.230.1
Chr1	Alternative 3' splice site	8386335	8386348	+	Chr1:8382144-8387234W	PB.270.2,PB.270.1/PB.270.3/PB.270.4/PB.270.5/PB.270.6
Chr1	Alternative 3' splice site	8893772	8893798	+	Chr1:8892624-8900091W	PB.289.2,PB.289.1
Chr1	Alternative 5' splice site	9169341	9169345	+	Chr1:9166353-9169971W	PB.300.1,PB.300.3
Chr1	Intron retention	12872986	12873349	+	Chr1:12870958-12874257W	PB.382.3,PB.382.1/PB.382.2
Chr1	Intron retention	14452426	14452520	+	Chr1:14447714-14453454W	PB.392.1,PB.392.2
Chr1	Alternative 3' splice site	16717732	16717750	+	Chr1:16716671-16719375W	PB.410.2,PB.410.1
Chr1	Intron retention	17154309	17154389	+	Chr1:17151741-17157850W	PB.411.4,PB.411.3
Chr1	Exon skipping	17154389	17154484	+	Chr1:17151741-17157850W	PB.411.1,PB.411.3
Chr1	Alternative 5' splice site	17154309	17154484	+	Chr1:17151741-17157850W	PB.411.1,PB.411.4
Chr1	Alternative 3' splice site	25133756	25133851	+	Chr1:25132892-25138138W	PB.563.1,PB.563.2
Chr1	Alternative 3' splice site	25516467	25516470	+	Chr1:25513946-25518078W	PB.574.2,PB.574.1
Chr1	Exon skipping	25700122	25700396	+	Chr1:25696671-25705089W	PB.579.1/PB.579.2,PB.579.3
Chr1	Intron retention	27085231	27085284	+	Chr1:27081804-27085708W	PB.616.3/PB.616.4,PB.616.2
Chr1	Intron retention	28732547	28732991	+	Chr1:28729115-28735092W	PB.662.3,PB.662.1/PB.662.2
Chr1	Alternative 5' splice site	29503404	29503431	+	Chr1:29501126-29506964W	PB.690.1/PB.690.4,PB.690.2/PB.690.3
Chr1	Intron retention	29503404	29503626	+	Chr1:29501126-29506964W	PB.690.5,PB.690.1/PB.690.4
Chr1	Intron retention	29503431	29503626	+	Chr1:29501126-29506964W	PB.690.5,PB.690.2/PB.690.3
Chr1	Alternative 5' splice site	31350538	31350546	+	Chr1:31349660-31353106W	PB.759.2,PB.759.1
Chr1	Exon skipping	31751575	31751632	+	Chr1:31749274-31753372W	PB.781.2,PB.781.1
Chr1	Exon skipping	32475908	32476018	+	Chr1:32470229-32476606W	PB.810.2,PB.810.1
Chr1	Intron retention	33838129	33838212	+	Chr1:33837392-33840429W	PB.874.1,PB.874.2
Chr1	Intron retention	34937947	34939020	+	Chr1:34916549-34941825W	PB.916.5,PB.916.4
Chr1	Intron retention	35145670	35145730	+	Chr1:35145516-35147342W	PB.921.1,PB.921.2
Chr1	Intron retention	36345162	36345281	+	Chr1:36343901-36346317W	PB.972.3,PB.972.5
Chr1	Intron retention	36345138	36345264	+	Chr1:36343901-36346317W	PB.972.3,PB.972.2
Chr1	Intron retention	37272021	37272543	+	Chr1:37269811-37274715W	PB.1007.8,PB.1007.1/PB.1007.4
Chr1	Exon skipping	37272543	37272747	+	Chr1:37269811-37274715W	PB.1007.7/PB.1007.9,PB.1007.1/PB.1007.4
Chr1	Alternative 5' splice site	37272021	37272747	+	Chr1:37269811-37274715W	PB.1007.7/PB.1007.9,PB.1007.8
Chr1	Alternative 3' splice site	37553990	37554000	+	Chr1:37551977-37556501W	PB.1019.2,PB.1019.1
Chr1	Alternative 5' splice site	37839261	37839270	+	Chr1:37837114-37840365W	PB.1032.1,PB.1032.2
Chr1	Intron retention	38891328	38891342	+	Chr1:38891204-38893619W	PB.1076.1,PB.1076.2
Chr1	Intron retention	38974673	38974783	+	Chr1:38969122-38976401W	PB.1082.5,PB.1082.4
Chr1	Intron retention	42230254	42230344	+	Chr1:42229527-42232646W	PB.1205.2/PB.1205.4,PB.1205.1
Chr1	Intron retention	42230456	42230554	+	Chr1:42229527-42232646W	PB.1205.3,PB.1205.1
Chr1	Intron retention	311163	310918	-	Chr1:309529-313170C	PB.18.2,PB.18.1
Chr1	Intron retention	1508010	1507892	-	Chr1:1504013-1508066C	PB.56.1,PB.56.2
Chr1	Alternative 3' splice site	2988273	2988042	-	Chr1:2986328-2989305C	PB.105.1,PB.105.2/PB.105.3
Chr1	Intron retention	4330752	4330551	-	Chr1:4329367-4332196C	PB.152.2,PB.152.1
Chr1	Alternative 5' splice site	4742186	4742148	-	Chr1:4739270-4744476C	PB.167.4,PB.167.1
Chr1	Alternative 3' splice site	7899227	7899219	-	Chr1:7894936-7900597C	PB.257.1,PB.257.2
Chr1	Exon skipping	9637869	9637832	-	Chr1:9630992-9638874C	PB.310.3,PB.310.2
Chr1	Intron retention	10806732	10806646	-	Chr1:10805514-10808080C	PB.341.2,PB.341.1
Chr1	Intron retention	11910519	11910389	-	Chr1:11906853-11910918C	PB.362.1,PB.362.2
Chr1	Alternative 5' splice site	17950552	17950544	-	Chr1:17947767-17951624C	PB.426.2,PB.426.1
Chr1	Intron retention	20600001	20599853	-	Chr1:20599109-20602200C	PB.464.1,PB.464.2
Chr1	Intron retention	23743614	23743510	-	Chr1:23740866-23744991C	PB.526.2,PB.526.1
Chr1	Intron retention	24153920	24153831	-	Chr1:24151006-24154089C	PB.533.2,PB.533.1/PB.533.3
Chr1	Exon skipping	24637861	24637807	-	Chr1:24633770-24639244C	PB.548.1,PB.548.2
Chr1	Intron retention	25778749	25778657	-	Chr1:25777612-25782318C	PB.581.1,PB.581.2
Chr1	Intron retention	32094045	32094029	-	Chr1:32091609-32094092C	PB.797.2,PB.797.1
Chr1	Intron retention	32093482	32093393	-	Chr1:32091609-32094092C	PB.797.1,PB.797.2
Chr1	Intron retention	32093183	32093107	-	Chr1:32091609-32094092C	PB.797.1,PB.797.2
Chr1	Intron retention	34139079	34138943	-	Chr1:34138392-34139710C	PB.886.1,PB.886.2
Chr1	Exon skipping	35927363	35927315	-	Chr1:35925492-35929395C	PB.957.2,PB.957.1
Chr1	Intron retention	37586813	37586722	-	Chr1:37584832-37588105C	PB.1021.2,PB.1021.1
Chr1	Exon skipping	39915590	39915528	-	Chr1:39914149-39916487C	PB.1117.2,PB.1117.1/PB.1117.3
Chr1	Intron retention	40861248	40860980	-	Chr1:40858451-40861827C	PB.1156.1,PB.1156.2
Chr1	Alternative 3' splice site	41577781	41577717	-	Chr1:41573961-41578801C	PB.1185.1,PB.1185.2
Chr1	Intron retention	42741532	42741441	-	Chr1:42738738-42742171C	PB.1223.3,PB.1223.1/PB.1223.2
Chr1	Intron retention	43237162	43237080	-	Chr1:43232032-43237973C	PB.1246.2,PB.1246.1/PB.1246.3
Chr10	Alternative 5' splice site	2885830	2885945	+	Chr10:2885464-2886579W	PB.1279.2,PB.1279.1
Chr10	Alternative 5' splice site	6147633	6147693	+	Chr10:6144694-6150401W	PB.1310.2,PB.1310.1
Chr10	Alternative 5' splice site	14106131	14106142	+	Chr10:14100725-14107001W	PB.1399.2,PB.1399.1
Chr10	Alternative 5' splice site	18089987	18089999	+	Chr10:18086393-18092518W	PB.1474.1/PB.1474.2,PB.1474.3
Chr10	Alternative 5' splice site	18978412	18978432	+	Chr10:18976007-18979153W	PB.1500.2,PB.1500.1/PB.1500.3/PB.1500.4
Chr10	Intron retention	19006027	19006178	+	Chr10:19005822-19007758W	PB.1504.1,PB.1504.2
Chr10	Intron retention	21859579	21859829	+	Chr10:21859033-21861262W	PB.1602.2,PB.1602.1
Chr10	Alternative 5' splice site	46681	46572	-	Chr10:45962-58337C	PB.1247.1,PB.1247.2
Chr10	Alternative 5' splice site	1011169	1009700	-	Chr10:1007645-1012930C	PB.1259.2,PB.1259.1
Chr10	Intron retention	3360079	3359796	-	Chr10:3358020-3360552C	PB.1290.4,PB.1290.1
Chr10	Alternative 5' splice site	6082128	6082119	-	Chr10:6079896-6087788C	PB.1309.1,PB.1309.2
Chr10	Exon skipping	14748032	14747940	-	Chr10:14746104-14750051C	PB.1416.2,PB.1416.3
Chr10	Intron retention	16086392	16086303	-	Chr10:16084448-16086689C	PB.1428.2,PB.1428.1
Chr10	Intron retention	16086162	16086041	-	Chr10:16084448-16086689C	PB.1428.3,PB.1428.1
Chr10	Alternative 5' splice site	16706929	16706910	-	Chr10:16704968-16708553C	PB.1438.2,PB.1438.1
Chr10	Exon skipping	16975802	16971690	-	Chr10:16950901-16976828C	PB.1443.1,PB.1443.3
Chr10	Intron retention	20432759	20432662	-	Chr10:20432055-20433202C	PB.1553.1,PB.1553.2
Chr10	Alternative 3' splice site	22989361	22989144	-	Chr10:22986858-22989898C	PB.1648.4,PB.1648.1/PB.1648.3
Chr11	Intron retention	2565760	2566020	+	Chr11:2565191-2568498W	PB.1750.1,PB.1750.2
Chr11	Exon skipping	7445226	7445282	+	Chr11:7443954-7459804W	PB.1821.1,PB.1821.2
Chr11	Intron retention	16276232	16276567	+	Chr11:16275417-16279668W	PB.1885.2,PB.1885.1
Chr11	Intron retention	22016923	22017080	+	Chr11:22016848-22018480W	PB.1926.1/PB.1926.2,PB.1926.3
Chr11	Alternative 3' splice site	27593867	27594187	+	Chr11:27591008-27596209W	PB.1969.3,PB.1969.2
Chr11	Intron retention	3279284	3279193	-	Chr11:3278458-3279419C	PB.1762.1,PB.1762.3
Chr11	Intron retention	3279098	3278978	-	Chr11:3278458-3279419C	PB.1762.2,PB.1762.1
Chr11	Alternative 3' splice site	8201189	8201172	-	Chr11:8198320-8201435C	PB.1833.2,PB.1833.1
Chr11	Exon skipping	13812012	13811860	-	Chr11:13802321-13841258C	PB.1864.2,PB.1864.1
Chr11	Intron retention	20106557	20106540	-	Chr11:20098045-20106792C	PB.1913.1,PB.1913.2
Chr11	Alternative 3' splice site	20103617	20103614	-	Chr11:20098045-20106792C	PB.1913.1,PB.1913.2
Chr11	Exon skipping	28933953	28933869	-	Chr11:28932959-28936031C	PB.1981.1,PB.1981.2
Chr12	Alternative 3' splice site	4211118	4211121	+	Chr12:4209144-4213078W	PB.2091.2,PB.2091.1
Chr12	Intron retention	4501309	4501426	+	Chr12:4499736-4503990W	PB.2095.2,PB.2095.1
Chr12	Intron retention	6916511	6917022	+	Chr12:6916189-6918444W	PB.2114.2,PB.2114.1
Chr12	Exon skipping	25094294	25094458	+	Chr12:25091783-25098242W	PB.2325.2,PB.2325.1
Chr12	Alternative 5' splice site	26024639	26024644	+	Chr12:26021702-26026070W	PB.2345.1,PB.2345.2
Chr12	Intron retention	439310	439294	-	Chr12:439128-443293C	PB.1997.1,PB.1997.2
Chr12	Intron retention	927222	927142	-	Chr12:921863-927897C	PB.2016.2,PB.2016.3
Chr12	Intron retention	926839	926731	-	Chr12:921863-927897C	PB.2016.5,PB.2016.3
Chr12	Intron retention	927471	926731	-	Chr12:921863-927897C	PB.2016.1,PB.2016.2
Chr12	Intron retention	927471	926731	-	Chr12:921863-927897C	PB.2016.1,PB.2016.3
Chr12	Intron retention	927471	927142	-	Chr12:921863-927897C	PB.2016.1,PB.2016.5
Chr12	Intron retention	1774111	1773803	-	Chr12:1772558-1774691C	PB.2032.5,PB.2032.6
Chr12	Intron retention	1774111	1773803	-	Chr12:1772558-1774691C	PB.2032.2,PB.2032.3
Chr12	Intron retention	1773644	1773526	-	Chr12:1772558-1774691C	PB.2032.4,PB.2032.5
Chr12	Intron retention	2468204	2468136	-	Chr12:2467915-2469712C	PB.2051.1,PB.2051.2
Chr12	Intron retention	2598035	2597572	-	Chr12:2595501-2600070C	PB.2054.2,PB.2054.1
Chr12	Alternative 3' splice site	2853106	2853097	-	Chr12:2851827-2856278C	PB.2060.2,PB.2060.1
Chr12	Alternative 5' splice site	3889548	3889270	-	Chr12:3885469-3889693C	PB.2083.2,PB.2083.1
Chr12	Alternative 3' splice site	10442568	10442565	-	Chr12:10436104-10443966C	PB.2142.1,PB.2142.3
Chr12	Alternative 3' splice site	10440872	10440863	-	Chr12:10436104-10443966C	PB.2142.1,PB.2142.3
Chr12	Alternative 3' splice site	14904150	14904144	-	Chr12:14897151-14904518C	PB.2176.1,PB.2176.2
Chr12	Intron retention	16198301	16198180	-	Chr12:16196138-16199456C	PB.2178.4,PB.2178.1/PB.2178.5
Chr12	Intron retention	16198027	16197774	-	Chr12:16196138-16199456C	PB.2178.3,PB.2178.1/PB.2178.5
Chr12	Intron retention	16197660	16197469	-	Chr12:16196138-16199456C	PB.2178.2,PB.2178.3
Chr12	Intron retention	16198027	16197469	-	Chr12:16196138-16199456C	PB.2178.2,PB.2178.1/PB.2178.5
Chr12	Exon skipping	16197919	16197378	-	Chr12:16196138-16199456C	PB.2178.4,PB.2178.1/PB.2178.5
Chr12	Intron retention	16198301	16197252	-	Chr12:16196138-16199456C	PB.2178.6,PB.2178.1/PB.2178.5
Chr12	Intron retention	16196768	16196672	-	Chr12:16196138-16199456C	PB.2178.5,PB.2178.1
Chr12	Intron retention	16196945	16196672	-	Chr12:16196138-16199456C	PB.2178.6,PB.2178.1
Chr12	Intron retention	16196945	16196865	-	Chr12:16196138-16199456C	PB.2178.6,PB.2178.5
Chr12	Intron retention	16196986	16196822	-	Chr12:16196138-16199456C	PB.2178.3/PB.2178.4,PB.2178.2
Chr12	Intron retention	16197096	16196672	-	Chr12:16196138-16199456C	PB.2178.3/PB.2178.4,PB.2178.1
Chr12	Intron retention	16197096	16196865	-	Chr12:16196138-16199456C	PB.2178.3/PB.2178.4,PB.2178.5
Chr12	Intron retention	16197096	16197009	-	Chr12:16196138-16199456C	PB.2178.7,PB.2178.6
Chr12	Intron retention	16198027	16197252	-	Chr12:16196138-16199456C	PB.2178.7,PB.2178.4
Chr12	Intron retention	16198301	16196822	-	Chr12:16196138-16199456C	PB.2178.7,PB.2178.2
Chr12	Intron retention	16198301	16197252	-	Chr12:16196138-16199456C	PB.2178.7,PB.2178.3
Chr12	Intron retention	16198301	16196672	-	Chr12:16196138-16199456C	PB.2178.7,PB.2178.1
Chr12	Intron retention	16198301	16196865	-	Chr12:16196138-16199456C	PB.2178.7,PB.2178.5
Chr2	Intron retention	16094	16122	+	Chr2:14089-18598W	PB.2389.2,PB.2389.3
Chr2	Intron retention	15694	15995	+	Chr2:14089-18598W	PB.2389.1,PB.2389.2
Chr2	Intron retention	15694	16122	+	Chr2:14089-18598W	PB.2389.1,PB.2389.3
Chr2	Alternative 3' splice site	59797	59804	+	Chr2:59327-64701W	PB.2392.1/PB.2392.3,PB.2392.2
Chr2	Alternative 5' splice site	1392629	1392633	+	Chr2:1387989-1394276W	PB.2460.1,PB.2460.2
Chr2	Intron retention	4543419	4543530	+	Chr2:4542945-4544914W	PB.2547.1,PB.2547.2
Chr2	Alternative 3' splice site	5505316	5505583	+	Chr2:5505043-5508423W	PB.2584.2,PB.2584.1
Chr2	Intron retention	10078356	10078465	+	Chr2:10074581-10081492W	PB.2660.1,PB.2660.2
Chr2	Intron retention	11402500	11402585	+	Chr2:11399638-11403992W	PB.2677.2,PB.2677.1
Chr2	Intron retention	11964854	11965476	+	Chr2:11961733-11967889W	PB.2685.4,PB.2685.2
Chr2	Alternative 3' splice site	13759876	13759887	+	Chr2:13759290-13767120W	PB.2710.1,PB.2710.2
Chr2	Intron retention	13765950	13765964	+	Chr2:13759290-13767120W	PB.2710.2,PB.2710.1
Chr2	Alternative 3' splice site	18539029	18539069	+	Chr2:18537091-18540842W	PB.2769.1,PB.2769.2
Chr2	Alternative 3' splice site	22335300	22335323	+	Chr2:22333257-22337641W	PB.2861.2,PB.2861.3/PB.2861.4
Chr2	Alternative 3' splice site	23564843	23564852	+	Chr2:23563344-23565936W	PB.2898.2,PB.2898.1
Chr2	Alternative 5' splice site	25449044	25449048	+	Chr2:25442875-25450107W	PB.2954.1/PB.2954.2,PB.2954.3
Chr2	Alternative 3' splice site	25734162	25734191	+	Chr2:25732975-25736487W	PB.2969.2,PB.2969.1
Chr2	Intron retention	25734421	25734495	+	Chr2:25732975-25736487W	PB.2969.3,PB.2969.1
Chr2	Intron retention	25895748	25896391	+	Chr2:25895507-25899901W	PB.2973.2/PB.2973.4,PB.2973.1
Chr2	Intron retention	25895604	25895667	+	Chr2:25895507-25899901W	PB.2973.2/PB.2973.4,PB.2973.3
Chr2	Exon skipping	28673296	28673380	+	Chr2:28672998-28676867W	PB.3061.1,PB.3061.2/PB.3061.3
Chr2	Intron retention	29270100	29270200	+	Chr2:29270053-29274378W	PB.3091.1,PB.3091.2
Chr2	Exon skipping	30013170	30013318	+	Chr2:30011093-30015618W	PB.3127.1,PB.3127.2
Chr2	Alternative 3' splice site	30419195	30419198	+	Chr2:30418559-30423139W	PB.3142.1,PB.3142.2
Chr2	Intron retention	31193272	31193296	+	Chr2:31190773-31193393W	PB.3175.1,PB.3175.2
Chr2	Alternative 5' splice site	31909163	31909170	+	Chr2:31908673-31911674W	PB.3211.5,PB.3211.6
Chr2	Alternative 3' splice site	31909553	31909561	+	Chr2:31908673-31911674W	PB.3211.3/PB.3211.6,PB.3211.4
Chr2	Intron retention	31909356	31909553	+	Chr2:31908673-31911674W	PB.3211.5,PB.3211.3/PB.3211.6
Chr2	Intron retention	33944484	33944566	+	Chr2:33942030-33946393W	PB.3288.2,PB.3288.1
Chr2	Alternative 3' splice site	34639735	34639796	+	Chr2:34637883-34640953W	PB.3312.2,PB.3312.1
Chr2	Alternative 5' splice site	34647344	34647348	+	Chr2:34644872-34649032W	PB.3313.3,PB.3313.2
Chr2	Alternative 3' splice site	34927634	34927639	+	Chr2:34926625-34929361W	PB.3321.2,PB.3321.1
Chr2	Intron retention	81923	81803	-	Chr2:79728-82986C	PB.2393.3,PB.2393.1
Chr2	Intron retention	840078	839982	-	Chr2:838735-842644C	PB.2426.2,PB.2426.1
Chr2	Exon skipping	1195251	1194903	-	Chr2:1193364-1197028C	PB.2451.1,PB.2451.2
Chr2	Intron retention	1232700	1232030	-	Chr2:1231184-1234484C	PB.2454.1,PB.2454.2
Chr2	Alternative 3' splice site	1653881	1653875	-	Chr2:1652099-1655218C	PB.2471.2,PB.2471.1
Chr2	Alternative 5' splice site	2859342	2859324	-	Chr2:2850227-2861377C	PB.2501.1,PB.2501.2
Chr2	Alternative 3' splice site	2859067	2859048	-	Chr2:2850227-2861377C	PB.2501.2,PB.2501.1
Chr2	Exon skipping	2854341	2854264	-	Chr2:2850227-2861377C	PB.2501.3,PB.2501.1/PB.2501.2
Chr2	Intron retention	4632298	4632197	-	Chr2:4630397-4634607C	PB.2553.1,PB.2553.2
Chr2	Alternative 5' splice site	6511642	6511334	-	Chr2:6509729-6513827C	PB.2606.1/PB.2606.2/PB.2606.4,PB.2606.3
Chr2	Intron retention	7519175	7519150	-	Chr2:7516221-7519231C	PB.2624.1,PB.2624.2
Chr2	Alternative 3' splice site	7632250	7632028	-	Chr2:7630878-7635202C	PB.2627.2,PB.2627.1
Chr2	Alternative 3' splice site	8556181	8556101	-	Chr2:8553836-8558167C	PB.2637.3,PB.2637.6
Chr2	Exon skipping	8556181	8555799	-	Chr2:8553836-8558167C	PB.2637.1/PB.2637.5,PB.2637.3
Chr2	Exon skipping	8556101	8555799	-	Chr2:8553836-8558167C	PB.2637.1/PB.2637.5,PB.2637.6
Chr2	Intron retention	8555799	8555628	-	Chr2:8553836-8558167C	PB.2637.4,PB.2637.6
Chr2	Alternative 3' splice site	8556101	8555628	-	Chr2:8553836-8558167C	PB.2637.4,PB.2637.1/PB.2637.5
Chr2	Intron retention	8556600	8555628	-	Chr2:8553836-8558167C	PB.2637.2,PB.2637.1/PB.2637.5
Chr2	Intron retention	8556600	8555628	-	Chr2:8553836-8558167C	PB.2637.2,PB.2637.3
Chr2	Intron retention	8556600	8555628	-	Chr2:8553836-8558167C	PB.2637.2,PB.2637.6
Chr2	Intron retention	8556600	8556101	-	Chr2:8553836-8558167C	PB.2637.2,PB.2637.4
Chr2	Intron retention	11595801	11595487	-	Chr2:11592259-11596449C	PB.2680.2/PB.2680.4,PB.2680.1/PB.2680.3/PB.2680.5
Chr2	Intron retention	13226685	13226568	-	Chr2:13223113-13227352C	PB.2705.3,PB.2705.1/PB.2705.2
Chr2	Intron retention	13226321	13226220	-	Chr2:13223113-13227352C	PB.2705.2,PB.2705.1/PB.2705.3
Chr2	Intron retention	15643138	15643010	-	Chr2:15641259-15647312C	PB.2732.2,PB.2732.1
Chr2	Intron retention	15642732	15642612	-	Chr2:15641259-15647312C	PB.2732.2,PB.2732.1
Chr2	Alternative 5' splice site	19312403	19312000	-	Chr2:19309596-19312784C	PB.2784.3,PB.2784.1
Chr2	Intron retention	22070277	22070172	-	Chr2:22067986-22070406C	PB.2856.1,PB.2856.3/PB.2856.4
Chr2	Alternative 3' splice site	22165423	22165394	-	Chr2:22163264-22167385C	PB.2859.3,PB.2859.1/PB.2859.2/PB.2859.4
Chr2	Intron retention	24273514	24273033	-	Chr2:24270243-24273564C	PB.2924.3,PB.2924.1
Chr2	Exon skipping	24273033	24272972	-	Chr2:24270243-24273564C	PB.2924.2,PB.2924.1
Chr2	Intron retention	24989198	24988999	-	Chr2:24985273-24989388C	PB.2942.1/PB.2942.3/PB.2942.4,PB.2942.2
Chr2	Intron retention	30395152	30394956	-	Chr2:30393278-30396654C	PB.3141.1/PB.3141.7/PB.3141.8/PB.3141.9,PB.3141.5
Chr2	Intron retention	30395107	30394999	-	Chr2:30393278-30396654C	PB.3141.1/PB.3141.7/PB.3141.8/PB.3141.9,PB.3141.6
Chr2	Intron retention	30395282	30395191	-	Chr2:30393278-30396654C	PB.3141.12/PB.3141.2/PB.3141.4,PB.3141.1/PB.3141.7/PB.3141.8/PB.3141.9
Chr2	Intron retention	30395282	30394956	-	Chr2:30393278-30396654C	PB.3141.12/PB.3141.2/PB.3141.4,PB.3141.5
Chr2	Intron retention	30395282	30394999	-	Chr2:30393278-30396654C	PB.3141.12/PB.3141.2/PB.3141.4,PB.3141.6
Chr2	Intron retention	30395283	30395195	-	Chr2:30393278-30396654C	PB.3141.13,PB.3141.15
Chr2	Intron retention	30395509	30395424	-	Chr2:30393278-30396654C	PB.3141.13,PB.3141.12/PB.3141.2/PB.3141.4
Chr2	Intron retention	30395509	30395191	-	Chr2:30393278-30396654C	PB.3141.13,PB.3141.1/PB.3141.7/PB.3141.8/PB.3141.9
Chr2	Intron retention	30395509	30394956	-	Chr2:30393278-30396654C	PB.3141.13,PB.3141.5
Chr2	Intron retention	30395509	30394999	-	Chr2:30393278-30396654C	PB.3141.13,PB.3141.6
Chr2	Intron retention	30394718	30394646	-	Chr2:30393278-30396654C	PB.3141.14,PB.3141.1/PB.3141.7/PB.3141.8/PB.3141.9
Chr2	Intron retention	30395152	30394646	-	Chr2:30393278-30396654C	PB.3141.14,PB.3141.5
Chr2	Intron retention	30395107	30394646	-	Chr2:30393278-30396654C	PB.3141.14,PB.3141.6
Chr2	Intron retention	30394718	30394646	-	Chr2:30393278-30396654C	PB.3141.10,PB.3141.12/PB.3141.2/PB.3141.4
Chr2	Intron retention	30395282	30394646	-	Chr2:30393278-30396654C	PB.3141.10,PB.3141.1/PB.3141.7/PB.3141.8/PB.3141.9
Chr2	Intron retention	30395282	30394646	-	Chr2:30393278-30396654C	PB.3141.10,PB.3141.5
Chr2	Intron retention	30395282	30394646	-	Chr2:30393278-30396654C	PB.3141.10,PB.3141.6
Chr2	Intron retention	30395282	30395191	-	Chr2:30393278-30396654C	PB.3141.10,PB.3141.14
Chr2	Intron retention	31700004	31699907	-	Chr2:31698123-31700396C	PB.3199.2,PB.3199.1
Chr2	Alternative 5' splice site	31920227	31920215	-	Chr2:31916203-31920581C	PB.3212.1,PB.3212.2
Chr2	Alternative 5' splice site	31920227	31920224	-	Chr2:31916203-31920581C	PB.3212.1,PB.3212.3
Chr2	Alternative 5' splice site	31920224	31920215	-	Chr2:31916203-31920581C	PB.3212.3,PB.3212.2
Chr2	Intron retention	32329506	32329283	-	Chr2:32326213-32330123C	PB.3231.2,PB.3231.1
Chr2	Intron retention	33173387	33173217	-	Chr2:33169965-33175627C	PB.3258.4,PB.3258.2/PB.3258.5/PB.3258.6
Chr2	Intron retention	34211170	34211100	-	Chr2:34210423-34214930C	PB.3295.4,PB.3295.1/PB.3295.5/PB.3295.6
Chr2	Intron retention	34892005	34891843	-	Chr2:34889673-34893936C	PB.3317.1,PB.3317.2
Chr2	Intron retention	35644393	35644294	-	Chr2:35642997-35648177C	PB.3373.2,PB.3373.1/PB.3373.3
Chr2	Intron retention	35685943	35685766	-	Chr2:35683512-35688540C	PB.3376.3,PB.3376.1/PB.3376.4
Chr3	Alternative 3' splice site	498023	498028	+	Chr3:497762-499713W	PB.3419.2,PB.3419.3
Chr3	Intron retention	633868	633947	+	Chr3:632559-636354W	PB.3428.2,PB.3428.1/PB.3428.3
Chr3	Intron retention	1432351	1432464	+	Chr3:1430586-1433748W	PB.3467.1,PB.3467.2
Chr3	Intron retention	1831777	1831885	+	Chr3:1831335-1833068W	PB.3490.2,PB.3490.4
Chr3	Intron retention	1832063	1832343	+	Chr3:1831335-1833068W	PB.3490.3,PB.3490.4
Chr3	Intron retention	3655724	3655837	+	Chr3:3653712-3657152W	PB.3563.2,PB.3563.1
Chr3	Intron retention	6755233	6756046	+	Chr3:6754275-6756839W	PB.3695.2,PB.3695.1
Chr3	Intron retention	7480703	7481687	+	Chr3:7480379-7483286W	PB.3718.4,PB.3718.5
Chr3	Intron retention	8487887	8488206	+	Chr3:8487521-8489368W	PB.3762.2,PB.3762.1
Chr3	Intron retention	8822809	8822835	+	Chr3:8819413-8824308W	PB.3785.2,PB.3785.1
Chr3	Alternative 3' splice site	9049471	9049489	+	Chr3:9047645-9051464W	PB.3803.2,PB.3803.1
Chr3	Intron retention	9437454	9438124	+	Chr3:9436521-9440614W	PB.3814.3,PB.3814.1/PB.3814.2/PB.3814.4/PB.3814.5/PB.3814.6
Chr3	Intron retention	9439026	9439114	+	Chr3:9436521-9440614W	PB.3814.4,PB.3814.1/PB.3814.2/PB.3814.3/PB.3814.5/PB.3814.6/PB.3814.7/PB.3814.8
Chr3	Intron retention	9439705	9439801	+	Chr3:9436521-9440614W	PB.3814.4/PB.3814.5,PB.3814.1/PB.3814.2/PB.3814.3/PB.3814.6/PB.3814.7/PB.3814.8/PB.3814.9
Chr3	Alternative 5' splice site	9987767	9987782	+	Chr3:9987213-9990332W	PB.3842.2,PB.3842.1
Chr3	Intron retention	11367644	11367746	+	Chr3:11367207-11368991W	PB.3899.4,PB.3899.3
Chr3	Intron retention	11367644	11367746	+	Chr3:11367207-11368991W	PB.3899.2,PB.3899.5
Chr3	Intron retention	11368306	11368392	+	Chr3:11367207-11368991W	PB.3899.3,PB.3899.4/PB.3899.6
Chr3	Alternative 3' splice site	15651422	15651482	+	Chr3:15648904-15652097W	PB.4012.2,PB.4012.3
Chr3	Intron retention	21393079	21393599	+	Chr3:21392894-21394754W	PB.4098.2,PB.4098.1
Chr3	Intron retention	29527516	29527603	+	Chr3:29526118-29529138W	PB.4285.3,PB.4285.2/PB.4285.4
Chr3	Alternative 5' splice site	30760184	30760199	+	Chr3:30760079-30763707W	PB.4328.4,PB.4328.3
Chr3	Intron retention	30763204	30763339	+	Chr3:30760079-30763707W	PB.4328.2,PB.4328.3
Chr3	Intron retention	32371994	32372109	+	Chr3:32371755-32374790W	PB.4405.2/PB.4405.4,PB.4405.3
Chr3	Alternative 3' splice site	32376790	32376795	+	Chr3:32375896-32378676W	PB.4406.2,PB.4406.1
Chr3	Intron retention	34166652	34166782	+	Chr3:34166100-34167521W	PB.4501.1,PB.4501.2
Chr3	Alternative 3' splice site	34418600	34418624	+	Chr3:34412887-34419127W	PB.4516.2,PB.4516.1
Chr3	Alternative 5' splice site	35102107	35102132	+	Chr3:35100453-35103555W	PB.4561.1,PB.4561.2
Chr3	Intron retention	36382528	36382604	+	Chr3:36381718-36384500W	PB.4629.2,PB.4629.1
Chr3	Alternative 5' splice site	960053	959977	-	Chr3:958080-960097C	PB.3447.3,PB.3447.2
Chr3	Intron retention	2654795	2654529	-	Chr3:2651932-2661706C	PB.3527.9,PB.3527.3
Chr3	Alternative 5' splice site	2654446	2654420	-	Chr3:2651932-2661706C	PB.3527.2,PB.3527.12
Chr3	Alternative 5' splice site	2654420	2654405	-	Chr3:2651932-2661706C	PB.3527.12,PB.3527.8
Chr3	Alternative 5' splice site	2654446	2654405	-	Chr3:2651932-2661706C	PB.3527.2,PB.3527.8
Chr3	Alternative 3' splice site	2654271	2654256	-	Chr3:2651932-2661706C	PB.3527.8,PB.3527.7
Chr3	Intron retention	2654522	2654302	-	Chr3:2651932-2661706C	PB.3527.11/PB.3527.4,PB.3527.3
Chr3	Intron retention	2654420	2654271	-	Chr3:2651932-2661706C	PB.3527.5,PB.3527.12
Chr3	Intron retention	2654446	2654271	-	Chr3:2651932-2661706C	PB.3527.5,PB.3527.2
Chr3	Intron retention	2654405	2654271	-	Chr3:2651932-2661706C	PB.3527.5,PB.3527.8
Chr3	Intron retention	2654522	2654271	-	Chr3:2651932-2661706C	PB.3527.5,PB.3527.9
Chr3	Intron retention	2654795	2654529	-	Chr3:2651932-2661706C	PB.3527.5,PB.3527.11
Chr3	Intron retention	2654795	2654302	-	Chr3:2651932-2661706C	PB.3527.5,PB.3527.3
Chr3	Alternative 3' splice site	3129541	3129538	-	Chr3:3126239-3130481C	PB.3544.3,PB.3544.1
Chr3	Intron retention	4337506	4337492	-	Chr3:4336742-4338921C	PB.3595.1,PB.3595.2
Chr3	Alternative 5' splice site	6706970	6706964	-	Chr3:6706235-6710684C	PB.3694.2,PB.3694.1
Chr3	Intron retention	7126504	7125922	-	Chr3:7124869-7127130C	PB.3704.3,PB.3704.1
Chr3	Alternative 3' splice site	7437817	7437811	-	Chr3:7434036-7438100C	PB.3713.2,PB.3713.1
Chr3	Intron retention	7932456	7932372	-	Chr3:7929012-7934000C	PB.3747.2,PB.3747.1
Chr3	Alternative 3' splice site	8769634	8769600	-	Chr3:8767494-8770548C	PB.3780.4,PB.3780.1/PB.3780.10/PB.3780.2/PB.3780.3/PB.3780.5/PB.3780.6/PB.3780.7/PB.3780.8/PB.3780.9
Chr3	Exon skipping	8768874	8768777	-	Chr3:8767494-8770548C	PB.3780.2/PB.3780.4/PB.3780.7,PB.3780.1/PB.3780.3/PB.3780.8
Chr3	Intron retention	8768777	8768659	-	Chr3:8767494-8770548C	PB.3780.10/PB.3780.5/PB.3780.6,PB.3780.1/PB.3780.3/PB.3780.8
Chr3	Alternative 3' splice site	8768874	8768659	-	Chr3:8767494-8770548C	PB.3780.10/PB.3780.5/PB.3780.6,PB.3780.2/PB.3780.4/PB.3780.7
Chr3	Intron retention	8768982	8768659	-	Chr3:8767494-8770548C	PB.3780.9,PB.3780.2/PB.3780.4/PB.3780.7
Chr3	Intron retention	8768982	8768659	-	Chr3:8767494-8770548C	PB.3780.9,PB.3780.1/PB.3780.3/PB.3780.8
Chr3	Intron retention	8768982	8768874	-	Chr3:8767494-8770548C	PB.3780.9,PB.3780.10/PB.3780.5/PB.3780.6
Chr3	Intron retention	9169273	9169189	-	Chr3:9167737-9170337C	PB.3805.1,PB.3805.2
Chr3	Intron retention	9855100	9854387	-	Chr3:9847713-9868891C	PB.3837.5,PB.3837.4
Chr3	Intron retention	10122459	10122351	-	Chr3:10120287-10124399C	PB.3847.4,PB.3847.1/PB.3847.3/PB.3847.5/PB.3847.6/PB.3847.7
Chr3	Intron retention	10121563	10121462	-	Chr3:10120287-10124399C	PB.3847.3,PB.3847.1/PB.3847.4/PB.3847.5/PB.3847.6/PB.3847.7
Chr3	Intron retention	10320770	10320747	-	Chr3:10320270-10324794C	PB.3855.1,PB.3855.2
Chr3	Alternative 3' splice site	10840410	10840401	-	Chr3:10839454-10840785C	PB.3880.2/PB.3880.5,PB.3880.1/PB.3880.3/PB.3880.4
Chr3	Alternative 3' splice site	13129921	13129918	-	Chr3:13126190-13137488C	PB.3958.5,PB.3958.1/PB.3958.3
Chr3	Intron retention	15766729	15766629	-	Chr3:15763411-15767285C	PB.4018.3,PB.4018.1/PB.4018.2
Chr3	Intron retention	16303950	16303865	-	Chr3:16301353-16307699C	PB.4026.5,PB.4026.2/PB.4026.3/PB.4026.4
Chr3	Alternative 5' splice site	16303799	16303770	-	Chr3:16301353-16307699C	PB.4026.6,PB.4026.2/PB.4026.3/PB.4026.4/PB.4026.7
Chr3	Intron retention	16303311	16303227	-	Chr3:16301353-16307699C	PB.4026.4,PB.4026.2/PB.4026.5/PB.4026.6/PB.4026.7
Chr3	Intron retention	16409734	16409451	-	Chr3:16407634-16410011C	PB.4030.2,PB.4030.1/PB.4030.3
Chr3	Intron retention	16408440	16408335	-	Chr3:16407634-16410011C	PB.4030.3,PB.4030.1/PB.4030.2/PB.4030.4
Chr3	Intron retention	28823946	28823842	-	Chr3:28822516-28826332C	PB.4258.2,PB.4258.3
Chr3	Alternative 3' splice site	30906606	30906602	-	Chr3:30903936-30907117C	PB.4335.2,PB.4335.3
Chr3	Intron retention	35447820	35447687	-	Chr3:35446443-35452470C	PB.4580.2,PB.4580.5
Chr3	Exon skipping	35447885	35447398	-	Chr3:35446443-35452470C	PB.4580.3,PB.4580.2
Chr3	Exon skipping	35447885	35447398	-	Chr3:35446443-35452470C	PB.4580.3,PB.4580.6
Chr3	Intron retention	35447398	35447224	-	Chr3:35446443-35452470C	PB.4580.5,PB.4580.2
Chr3	Intron retention	35447398	35447224	-	Chr3:35446443-35452470C	PB.4580.1,PB.4580.6
Chr3	Intron retention	35447574	35447503	-	Chr3:35446443-35452470C	PB.4580.1,PB.4580.5
Chr3	Intron retention	35447574	35447224	-	Chr3:35446443-35452470C	PB.4580.4,PB.4580.2
Chr3	Intron retention	35447820	35447687	-	Chr3:35446443-35452470C	PB.4580.4,PB.4580.1
Chr3	Intron retention	35447820	35447224	-	Chr3:35446443-35452470C	PB.4580.4,PB.4580.6
Chr3	Intron retention	35447820	35447503	-	Chr3:35446443-35452470C	PB.4580.4,PB.4580.5
Chr3	Alternative 3' splice site	35447885	35447224	-	Chr3:35446443-35452470C	PB.4580.4,PB.4580.3
Chr3	Intron retention	35448110	35447224	-	Chr3:35446443-35452470C	PB.4580.7,PB.4580.3
Chr3	Intron retention	35448110	35447885	-	Chr3:35446443-35452470C	PB.4580.7,PB.4580.4
Chr3	Intron retention	35448110	35447224	-	Chr3:35446443-35452470C	PB.4580.7,PB.4580.2
Chr3	Intron retention	35448110	35447687	-	Chr3:35446443-35452470C	PB.4580.7,PB.4580.1
Chr3	Intron retention	35448110	35447224	-	Chr3:35446443-35452470C	PB.4580.7,PB.4580.6
Chr3	Intron retention	35448110	35447503	-	Chr3:35446443-35452470C	PB.4580.7,PB.4580.5
Chr3	Alternative 3' splice site	36003789	36003774	-	Chr3:36001964-36007505C	PB.4608.1,PB.4608.2/PB.4608.3
Chr3	Intron retention	36284435	36284274	-	Chr3:36281398-36284948C	PB.4623.2,PB.4623.1
Chr4	Alternative 5' splice site	14713253	14713267	+	Chr4:14711384-14716710W	PB.4739.1,PB.4739.2/PB.4739.3
Chr4	Alternative 3' splice site	14714227	14714248	+	Chr4:14711384-14716710W	PB.4739.1,PB.4739.2/PB.4739.3
Chr4	Intron retention	14715185	14715456	+	Chr4:14711384-14716710W	PB.4739.1/PB.4739.3,PB.4739.2
Chr4	Intron retention	20708081	20708098	+	Chr4:20708031-20709838W	PB.4821.2,PB.4821.3
Chr4	Exon skipping	22168660	22168738	+	Chr4:22168285-22170955W	PB.4855.1,PB.4855.2
Chr4	Exon skipping	23104538	23104606	+	Chr4:23104040-23107583W	PB.4890.1,PB.4890.2
Chr4	Alternative 3' splice site	23104520	23104814	+	Chr4:23104040-23107583W	PB.4890.3,PB.4890.1
Chr4	Alternative 3' splice site	23317019	23317108	+	Chr4:23315245-23318842W	PB.4900.2,PB.4900.1
Chr4	Alternative 5' splice site	24265398	24265402	+	Chr4:24261440-24267732W	PB.4924.2,PB.4924.1
Chr4	Alternative 5' splice site	25114415	25114419	+	Chr4:25112766-25115181W	PB.4955.1,PB.4955.2
Chr4	Alternative 5' splice site	26618457	26618461	+	Chr4:26617455-26619087W	PB.5006.2,PB.5006.1
Chr4	Alternative 5' splice site	26690944	26690948	+	Chr4:26689872-26692562W	PB.5010.2,PB.5010.1
Chr4	Intron retention	26691962	26692049	+	Chr4:26689872-26692562W	PB.5010.1,PB.5010.2
Chr4	Intron retention	27424690	27424781	+	Chr4:27423434-27426238W	PB.5037.7,PB.5037.1/PB.5037.2/PB.5037.6/PB.5037.8
Chr4	Intron retention	27424858	27424934	+	Chr4:27423434-27426238W	PB.5037.3,PB.5037.1/PB.5037.2/PB.5037.6/PB.5037.8
Chr4	Alternative 5' splice site	27508934	27508951	+	Chr4:27505491-27509995W	PB.5039.3,PB.5039.1/PB.5039.2
Chr4	Intron retention	29089559	29090204	+	Chr4:29089515-29092999W	PB.5091.2,PB.5091.1
Chr4	Intron retention	30600030	30600133	+	Chr4:30599970-30602274W	PB.5148.1,PB.5148.2
Chr4	Intron retention	30682929	30683747	+	Chr4:30682199-30685210W	PB.5151.2,PB.5151.1
Chr4	Intron retention	31212781	31212898	+	Chr4:31203709-31214730W	PB.5178.1,PB.5178.2
Chr4	Intron retention	9368680	9368558	-	Chr4:9367937-9369135C	PB.4708.4,PB.4708.3
Chr4	Intron retention	14074300	14074122	-	Chr4:14072632-14074773C	PB.4736.2,PB.4736.1
Chr4	Intron retention	20129165	20128312	-	Chr4:20125052-20131004C	PB.4796.2,PB.4796.1
Chr4	Exon skipping	22941877	22941842	-	Chr4:22939471-22942306C	PB.4885.1,PB.4885.2
Chr4	Intron retention	24859323	24859190	-	Chr4:24858057-24859659C	PB.4943.4,PB.4943.3
Chr4	Intron retention	28719871	28719781	-	Chr4:28715556-28720814C	PB.5075.1,PB.5075.2
Chr4	Alternative 5' splice site	30318098	30318085	-	Chr4:30317723-30321813C	PB.5135.2,PB.5135.1
Chr4	Alternative 3' splice site	30389696	30389674	-	Chr4:30388396-30390717C	PB.5140.1,PB.5140.2
Chr4	Intron retention	30483140	30482727	-	Chr4:30482129-30483492C	PB.5144.1,PB.5144.2
Chr4	Alternative 5' splice site	31674539	31674371	-	Chr4:31669219-31674595C	PB.5197.6,PB.5197.1
Chr4	Exon skipping	31672427	31672213	-	Chr4:31669219-31674595C	PB.5197.1/PB.5197.2/PB.5197.6,PB.5197.4
Chr4	Intron retention	31669369	31669356	-	Chr4:31669219-31674595C	PB.5197.5,PB.5197.4
Chr4	Intron retention	35421453	35421240	-	Chr4:35418952-35421533C	PB.5371.5,PB.5371.2
Chr4	Alternative 3' splice site	35420609	35420505	-	Chr4:35418952-35421533C	PB.5371.3/PB.5371.4,PB.5371.1/PB.5371.2/PB.5371.5
Chr5	Intron retention	3533825	3534028	+	Chr5:3531483-3534890W	PB.5503.2,PB.5503.1
Chr5	Alternative 5' splice site	11701088	11701096	+	Chr5:11699568-11703097W	PB.5605.1,PB.5605.2
Chr5	Alternative 3' splice site	14161582	14161597	+	Chr5:14161390-14165808W	PB.5631.3,PB.5631.1/PB.5631.2/PB.5631.4/PB.5631.5/PB.5631.6
Chr5	Alternative 5' splice site	14165358	14165378	+	Chr5:14161390-14165808W	PB.5631.3/PB.5631.5,PB.5631.6
Chr5	Intron retention	16514043	16514175	+	Chr5:16512052-16517779W	PB.5659.1,PB.5659.2
Chr5	Intron retention	17211471	17211832	+	Chr5:17209609-17215874W	PB.5671.1,PB.5671.2
Chr5	Intron retention	18869213	18869305	+	Chr5:18868485-18872192W	PB.5706.1,PB.5706.2
Chr5	Exon skipping	20631064	20631197	+	Chr5:20630043-20632329W	PB.5766.2,PB.5766.1
Chr5	Intron retention	25620864	25620993	+	Chr5:25620551-25623360W	PB.5937.2,PB.5937.1/PB.5937.3
Chr5	Intron retention	26943563	26943642	+	Chr5:26943358-26946013W	PB.5988.1,PB.5988.2
Chr5	Exon skipping	27543221	27543765	+	Chr5:27542126-27545922W	PB.6014.1,PB.6014.2
Chr5	Intron retention	27544973	27545233	+	Chr5:27542126-27545922W	PB.6014.1,PB.6014.2
Chr5	Exon skipping	27860873	27860898	+	Chr5:27860627-27865052W	PB.6033.1/PB.6033.3,PB.6033.2
Chr5	Intron retention	27861245	27861363	+	Chr5:27860627-27865052W	PB.6033.1/PB.6033.2,PB.6033.3
Chr5	Alternative 5' splice site	29508914	29508922	+	Chr5:29507292-29509954W	PB.6097.1/PB.6097.3,PB.6097.2
Chr5	Intron retention	29634869	29634973	+	Chr5:29631924-29635777W	PB.6108.2,PB.6108.1/PB.6108.3
Chr5	Alternative 3' splice site	356136	356125	-	Chr5:354117-356635C	PB.5397.2,PB.5397.1/PB.5397.3
Chr5	Alternative 3' splice site	642338	642330	-	Chr5:640005-643318C	PB.5412.5,PB.5412.1/PB.5412.2/PB.5412.4/PB.5412.6/PB.5412.7
Chr5	Intron retention	719655	719578	-	Chr5:719167-721868C	PB.5414.2,PB.5414.1
Chr5	Intron retention	3296040	3295796	-	Chr5:3294654-3298056C	PB.5494.2,PB.5494.1/PB.5494.4
Chr5	Alternative 5' splice site	13422600	13422560	-	Chr5:13421570-13424003C	PB.5620.1,PB.5620.2
Chr5	Exon skipping	13612799	13612746	-	Chr5:13610591-13614121C	PB.5624.1/PB.5624.2/PB.5624.4,PB.5624.3
Chr5	Intron retention	14868807	14868664	-	Chr5:14866570-14869872C	PB.5640.1,PB.5640.2
Chr5	Intron retention	21502419	21502341	-	Chr5:21500739-21504234C	PB.5797.2,PB.5797.1
Chr5	Alternative 5' splice site	25327058	25327038	-	Chr5:25321359-25330845C	PB.5930.1,PB.5930.3
Chr5	Alternative 3' splice site	26914035	26913909	-	Chr5:26913384-26917218C	PB.5986.1,PB.5986.3
Chr5	Intron retention	26914121	26914035	-	Chr5:26913384-26917218C	PB.5986.2,PB.5986.1
Chr5	Intron retention	26914121	26913909	-	Chr5:26913384-26917218C	PB.5986.2,PB.5986.3
Chr6	Alternative 3' splice site	186304	186324	+	Chr6:185731-188136W	PB.6120.3,PB.6120.1/PB.6120.2
Chr6	Intron retention	646564	646586	+	Chr6:643703-646721W	PB.6140.2,PB.6140.1
Chr6	Intron retention	2258569	2258719	+	Chr6:2256853-2261000W	PB.6208.1,PB.6208.2
Chr6	Alternative 5' splice site	2560533	2560548	+	Chr6:2557987-2562216W	PB.6219.1,PB.6219.2
Chr6	Intron retention	3054196	3054305	+	Chr6:3051248-3055005W	PB.6237.1,PB.6237.2
Chr6	Alternative 3' splice site	8722740	8722757	+	Chr6:8720628-8726645W	PB.6367.1/PB.6367.2,PB.6367.3
Chr6	Intron retention	8722913	8722933	+	Chr6:8720628-8726645W	PB.6367.2,PB.6367.1/PB.6367.3
Chr6	Intron retention	12452976	12453077	+	Chr6:12452711-12454123W	PB.6415.2,PB.6415.1
Chr6	Intron retention	13407657	13407779	+	Chr6:13407319-13408722W	PB.6424.1/PB.6424.2,PB.6424.3
Chr6	Intron retention	21481116	21481240	+	Chr6:21478471-21482446W	PB.6494.2,PB.6494.1
Chr6	Intron retention	21481531	21481664	+	Chr6:21478471-21482446W	PB.6494.2,PB.6494.1
Chr6	Alternative 5' splice site	25690587	25690595	+	Chr6:25690499-25693854W	PB.6573.2/PB.6573.4,PB.6573.1/PB.6573.3
Chr6	Alternative 3' splice site	25692422	25692452	+	Chr6:25690499-25693854W	PB.6573.1/PB.6573.2/PB.6573.3,PB.6573.4
Chr6	Intron retention	27273503	27273596	+	Chr6:27272157-27275174W	PB.6621.2,PB.6621.3
Chr6	Alternative 3' splice site	27744432	27744476	+	Chr6:27743190-27747068W	PB.6638.1,PB.6638.2
Chr6	Intron retention	29133471	29133606	+	Chr6:29133106-29134582W	PB.6680.1,PB.6680.2
Chr6	Intron retention	29976905	29977264	+	Chr6:29976871-29977649W	PB.6709.1,PB.6709.2
Chr6	Intron retention	29997800	29997893	+	Chr6:29996314-29999124W	PB.6712.2,PB.6712.1
Chr6	Intron retention	30140914	30140932	+	Chr6:30136558-30141158W	PB.6720.1,PB.6720.3
Chr6	Exon skipping	30782658	30782983	+	Chr6:30779795-30784196W	PB.6742.1/PB.6742.3,PB.6742.2
Chr6	Intron retention	215405	215384	-	Chr6:215205-218018C	PB.6121.1,PB.6121.2
Chr6	Alternative 5' splice site	2288194	2287940	-	Chr6:2285838-2289952C	PB.6211.2,PB.6211.1
Chr6	Intron retention	4214232	4214182	-	Chr6:4213290-4215667C	PB.6271.2,PB.6271.1
Chr6	Intron retention	4797290	4797178	-	Chr6:4796652-4802527C	PB.6282.3,PB.6282.1
Chr6	Intron retention	7651461	7650886	-	Chr6:7649026-7654265C	PB.6349.2,PB.6349.1
Chr6	Alternative 3' splice site	8179420	8179400	-	Chr6:8179093-8184555C	PB.6358.1,PB.6358.2
Chr6	Intron retention	8876816	8876739	-	Chr6:8875889-8877780C	PB.6372.1,PB.6372.2
Chr6	Alternative 3' splice site	13604407	13604406	-	Chr6:13601986-13604917C	PB.6427.3,PB.6427.2/PB.6427.6
Chr6	Alternative 5' splice site	24094923	24094917	-	Chr6:24091284-24096122C	PB.6544.1,PB.6544.2
Chr6	Alternative 3' splice site	27679576	27679569	-	Chr6:27676381-27679753C	PB.6634.3/PB.6634.4/PB.6634.5,PB.6634.1
Chr6	Alternative 3' splice site	27677868	27677847	-	Chr6:27676381-27679753C	PB.6634.5,PB.6634.1/PB.6634.2/PB.6634.4
Chr6	Intron retention	27678188	27677201	-	Chr6:27676381-27679753C	PB.6634.3,PB.6634.1/PB.6634.2/PB.6634.4
Chr6	Intron retention	27678188	27677201	-	Chr6:27676381-27679753C	PB.6634.3,PB.6634.5
Chr6	Intron retention	29705999	29705623	-	Chr6:29703624-29707573C	PB.6698.2,PB.6698.1/PB.6698.3
Chr6	Intron retention	29980911	29980790	-	Chr6:29978895-29981912C	PB.6710.2,PB.6710.3
Chr6	Intron retention	30839317	30839165	-	Chr6:30838053-30839955C	PB.6745.4,PB.6745.1/PB.6745.3
Chr7	Exon skipping	38222	38268	+	Chr7:36140-42075W	PB.6766.2,PB.6766.1
Chr7	Intron retention	2795883	2796452	+	Chr7:2794093-2797344W	PB.6833.3,PB.6833.1/PB.6833.2
Chr7	Alternative 3' splice site	12752554	12752561	+	Chr7:12747664-12760650W	PB.6974.1,PB.6974.2
Chr7	Intron retention	23926359	23926388	+	Chr7:23925928-23931496W	PB.7193.2,PB.7193.3
Chr7	Alternative 3' splice site	25409649	25409660	+	Chr7:25408343-25413166W	PB.7235.2,PB.7235.1
Chr7	Exon skipping	26267406	26267603	+	Chr7:26265494-26272938W	PB.7275.3,PB.7275.1
Chr7	Intron retention	26267603	26267791	+	Chr7:26265494-26272938W	PB.7275.2,PB.7275.1
Chr7	Intron retention	27616601	27616698	+	Chr7:27615638-27618532W	PB.7315.2,PB.7315.1
Chr7	Intron retention	29005172	29005251	+	Chr7:29004222-29006152W	PB.7377.2,PB.7377.1
Chr7	Intron retention	29365211	29365330	+	Chr7:29363659-29370466W	PB.7389.2,PB.7389.1
Chr7	Alternative 3' splice site	472053	472040	-	Chr7:471176-477608C	PB.6784.2,PB.6784.1
Chr7	Alternative 3' splice site	2635274	2635271	-	Chr7:2634450-2636618C	PB.6830.2,PB.6830.1
Chr7	Intron retention	10820975	10820843	-	Chr7:10817329-10825061C	PB.6962.1/PB.6962.2,PB.6962.3
Chr7	Exon skipping	12655795	12655709	-	Chr7:12652874-12656519C	PB.6972.2/PB.6972.4/PB.6972.5,PB.6972.1
Chr7	Mutually exclusive exon	12655795	12655218	-	Chr7:12652874-12656519C	PB.6972.1,PB.6972.3
Chr7	Exon skipping	12655322	12655218	-	Chr7:12652874-12656519C	PB.6972.2/PB.6972.4/PB.6972.5,PB.6972.3
Chr7	Exon skipping	12654354	12653784	-	Chr7:12652874-12656519C	PB.6972.1/PB.6972.3/PB.6972.4,PB.6972.2
Chr7	Alternative 3' splice site	18254490	18254470	-	Chr7:18253682-18257927C	PB.7036.2,PB.7036.1
Chr7	Intron retention	20733584	20733523	-	Chr7:20733211-20735342C	PB.7087.2,PB.7087.3
Chr7	Intron retention	24318118	24318053	-	Chr7:24317735-24320963C	PB.7201.1,PB.7201.2
Chr8	Intron retention	6598715	6599159	+	Chr8:6598207-6603375W	PB.7551.1,PB.7551.2
Chr8	Alternative 3' splice site	8969747	8969756	+	Chr8:8968336-8970906W	PB.7572.1,PB.7572.2
Chr8	Intron retention	14357234	14357340	+	Chr8:14356981-14360786W	PB.7618.1,PB.7618.2
Chr8	Intron retention	15711647	15711671	+	Chr8:15710775-15716376W	PB.7634.2,PB.7634.1
Chr8	Alternative 3' splice site	15712396	15712410	+	Chr8:15710775-15716376W	PB.7634.2,PB.7634.1
Chr8	Intron retention	21446903	21447010	+	Chr8:21445978-21450793W	PB.7702.2,PB.7702.1
Chr8	Intron retention	22889196	22889417	+	Chr8:22887448-22892682W	PB.7727.1,PB.7727.2
Chr8	Exon skipping	26910758	26910800	+	Chr8:26909065-26913510W	PB.7846.1,PB.7846.2
Chr8	Intron retention	27317020	27317096	+	Chr8:27315980-27318236W	PB.7858.1,PB.7858.2
Chr8	Alternative 5' splice site	27706644	27706650	+	Chr8:27703403-27707139W	PB.7873.2,PB.7873.1
Chr8	Intron retention	27763290	27763361	+	Chr8:27761930-27794133W	PB.7875.1,PB.7875.2
Chr8	Intron retention	28371951	28372388	+	Chr8:28370536-28375815W	PB.7915.2,PB.7915.1
Chr8	Intron retention	516767	516232	-	Chr8:513750-518268C	PB.7425.1,PB.7425.2
Chr8	Alternative 5' splice site	986405	986396	-	Chr8:984045-987948C	PB.7442.2,PB.7442.1
Chr8	Intron retention	3393287	3393277	-	Chr8:3389103-3393453C	PB.7494.3,PB.7494.2
Chr8	Intron retention	5422814	5422789	-	Chr8:5422260-5426665C	PB.7535.2,PB.7535.1
Chr8	Intron retention	7347935	7347609	-	Chr8:7338938-7348039C	PB.7552.2,PB.7552.1
Chr8	Exon skipping	11872573	11872220	-	Chr8:11869966-11879452C	PB.7602.2,PB.7602.1
Chr8	Alternative 5' splice site	13988016	13988011	-	Chr8:13984217-13988093C	PB.7614.10/PB.7614.7,PB.7614.1/PB.7614.4
Chr8	Intron retention	13988011	13987923	-	Chr8:13984217-13988093C	PB.7614.2/PB.7614.9,PB.7614.1/PB.7614.4
Chr8	Intron retention	13988016	13987923	-	Chr8:13984217-13988093C	PB.7614.2/PB.7614.9,PB.7614.10/PB.7614.7
Chr8	Intron retention	20823250	20823173	-	Chr8:20821137-20824888C	PB.7691.2,PB.7691.1
Chr8	Intron retention	23722112	23721510	-	Chr8:23717833-23722181C	PB.7742.2,PB.7742.3/PB.7742.5
Chr8	Intron retention	24594394	24594161	-	Chr8:24593264-24597515C	PB.7771.1,PB.7771.4
Chr8	Exon skipping	25251546	25251515	-	Chr8:25250294-25254630C	PB.7789.3,PB.7789.1/PB.7789.2
Chr8	Intron retention	28146392	28146296	-	Chr8:28145060-28149227C	PB.7901.1,PB.7901.2/PB.7901.3/PB.7901.4
Chr8	Intron retention	28184529	28184389	-	Chr8:28183855-28185866C	PB.7905.2,PB.7905.1
Chr9	Alternative 3' splice site	881302	881495	+	Chr9:878209-889649W	PB.7930.2,PB.7930.3
Chr9	Alternative 3' splice site	887108	887113	+	Chr9:878209-889649W	PB.7930.2,PB.7930.3
Chr9	Intron retention	6016489	6016771	+	Chr9:6016452-6020366W	PB.7993.1,PB.7993.2
Chr9	Intron retention	14416420	14416439	+	Chr9:14414145-14416595W	PB.8070.1,PB.8070.2
Chr9	Exon skipping	18340178	18340203	+	Chr9:18339773-18343545W	PB.8170.1,PB.8170.2
Chr9	Alternative 3' splice site	19993286	19993289	+	Chr9:19991698-19995778W	PB.8243.2,PB.8243.1
Chr9	Intron retention	20368799	20368908	+	Chr9:20367500-20371140W	PB.8258.2,PB.8258.1
Chr9	Intron retention	21919584	21919699	+	Chr9:21917324-21922419W	PB.8326.3,PB.8326.1/PB.8326.2/PB.8326.4/PB.8326.5
Chr9	Intron retention	21920212	21920316	+	Chr9:21917324-21922419W	PB.8326.1/PB.8326.4,PB.8326.2/PB.8326.3/PB.8326.5
Chr9	Intron retention	21920890	21920965	+	Chr9:21917324-21922419W	PB.8326.5,PB.8326.1/PB.8326.2/PB.8326.3/PB.8326.4
Chr9	Intron retention	22934880	22934978	+	Chr9:22933970-22938880W	PB.8368.2,PB.8368.1
Chr9	Intron retention	15078822	15078717	-	Chr9:15076247-15079328C	PB.8086.2,PB.8086.1
Chr9	Intron retention	17254346	17254202	-	Chr9:17252055-17255529C	PB.8138.2,PB.8138.1
Chr9	Intron retention	17935412	17935215	-	Chr9:17932693-17935804C	PB.8163.2,PB.8163.1
Chr9	Exon skipping	18517930	18517904	-	Chr9:18514611-18541201C	PB.8176.1/PB.8176.12/PB.8176.2,PB.8176.6
Chr9	Intron retention	20601459	20601348	-	Chr9:20600605-20602940C	PB.8269.2,PB.8269.1
Chr9	Intron retention	22797343	22797254	-	Chr9:22793276-22797791C	PB.8363.2,PB.8363.1
ChrUn	Intron retention	623685	623569	-	ChrUn:621453-625222C	PB.8371.2,PB.8371.1/PB.8371.3/PB.8371.4

## Sheet: F02
Table S2 Splice junctions and AS modes with different ploidy levels
Chrom	AS_event	Event_start	Event_end	Strand	Gene_location	Transcript_id
Chr1	Exon skipping	197915	197954	+	Chr1:197611-200794W	PB.17.1/PB.17.2,PB.17.3
Chr1	Intron retention	198225	198830	+	Chr1:197611-200794W	PB.17.2,PB.17.1/PB.17.3
Chr1	Intron retention	538391	538452	+	Chr1:537710-543354W	PB.35.1,PB.35.2
Chr1	Intron retention	6320295	6320392	+	Chr1:6319213-6322335W	PB.211.3,PB.211.1/PB.211.2
Chr1	Intron retention	6894864	6895238	+	Chr1:6889405-6896386W	PB.222.2,PB.222.1
Chr1	Alternative 3' splice site	7252101	7252128	+	Chr1:7249770-7253754W	PB.235.2,PB.235.1
Chr1	Intron retention	7666934	7667055	+	Chr1:7665370-7668105W	PB.251.2/PB.251.3,PB.251.1
Chr1	Alternative 3' splice site	8683945	8684014	+	Chr1:8682986-8687567W	PB.285.2,PB.285.1
Chr1	Exon skipping	11130948	11131039	+	Chr1:11129464-11131866W	PB.345.2,PB.345.1
Chr1	Intron retention	11961589	11961674	+	Chr1:11958830-11964681W	PB.361.6,PB.361.1/PB.361.2/PB.361.3/PB.361.4/PB.361.5
Chr1	Exon skipping	11962203	11962257	+	Chr1:11958830-11964681W	PB.361.1/PB.361.3/PB.361.4/PB.361.5,PB.361.2
Chr1	Intron retention	11962034	11962420	+	Chr1:11958830-11964681W	PB.361.6,PB.361.1/PB.361.3/PB.361.4/PB.361.5
Chr1	Intron retention	11962034	11962420	+	Chr1:11958830-11964681W	PB.361.6,PB.361.2
Chr1	Intron retention	11963102	11963141	+	Chr1:11958830-11964681W	PB.361.2/PB.361.3/PB.361.5/PB.361.6,PB.361.1
Chr1	Intron retention	11963176	11964025	+	Chr1:11958830-11964681W	PB.361.2/PB.361.3/PB.361.5/PB.361.6,PB.361.4
Chr1	Intron retention	11964527	11964562	+	Chr1:11958830-11964681W	PB.361.3,PB.361.1
Chr1	Alternative 3' splice site	11977168	11977790	+	Chr1:11974132-11981811W	PB.363.2,PB.363.1
Chr1	Intron retention	13566213	13566307	+	Chr1:13560811-13566900W	PB.384.1,PB.384.2
Chr1	Intron retention	14452426	14452520	+	Chr1:14446935-14453462W	PB.392.1,PB.392.2
Chr1	Alternative 3' splice site	16065530	16065533	+	Chr1:16061955-16067676W	PB.409.2,PB.409.1
Chr1	Intron retention	17153620	17153789	+	Chr1:17151740-17157947W	PB.415.13,PB.415.1/PB.415.10/PB.415.11/PB.415.12/PB.415.2/PB.415.3/PB.415.4/PB.415.5/PB.415.6/PB.415.7/PB.415.8/PB.415.9
Chr1	Intron retention	17154273	17154386	+	Chr1:17151740-17157947W	PB.415.10/PB.415.5,PB.415.4
Chr1	Intron retention	17154309	17154389	+	Chr1:17151740-17157947W	PB.415.10/PB.415.5,PB.415.2/PB.415.3/PB.415.7/PB.415.9
Chr1	Exon skipping	17154389	17154484	+	Chr1:17151740-17157947W	PB.415.1/PB.415.11/PB.415.12/PB.415.6/PB.415.8,PB.415.2/PB.415.3/PB.415.7/PB.415.9
Chr1	Alternative 5' splice site	17154309	17154484	+	Chr1:17151740-17157947W	PB.415.1/PB.415.11/PB.415.12/PB.415.6/PB.415.8,PB.415.10/PB.415.5
Chr1	Intron retention	17157411	17157517	+	Chr1:17151740-17157947W	PB.415.1/PB.415.13/PB.415.7,PB.415.3
Chr1	Intron retention	17157411	17157517	+	Chr1:17151740-17157947W	PB.415.4,PB.415.5/PB.415.8/PB.415.9
Chr1	Intron retention	17349424	17349589	+	Chr1:17349335-17350810W	PB.420.5,PB.420.6
Chr1	Alternative 3' splice site	20572718	20572841	+	Chr1:20540787-20576210W	PB.466.4,PB.466.1/PB.466.3
Chr1	Alternative 5' splice site	21179514	21179518	+	Chr1:21175713-21179959W	PB.479.1,PB.479.2
Chr1	Intron retention	22428512	22429268	+	Chr1:22427833-22430779W	PB.502.2,PB.502.1
Chr1	Intron retention	22429608	22429843	+	Chr1:22427833-22430779W	PB.502.2,PB.502.1
Chr1	Intron retention	22453353	22453496	+	Chr1:22450498-22455563W	PB.505.3,PB.505.1/PB.505.2
Chr1	Alternative 5' splice site	23321613	23321642	+	Chr1:23318739-23322893W	PB.530.2,PB.530.1
Chr1	Intron retention	23731342	23731705	+	Chr1:23727800-23733132W	PB.538.2,PB.538.1/PB.538.3
Chr1	Intron retention	24896628	24896867	+	Chr1:24894706-24899504W	PB.574.1,PB.574.2
Chr1	Alternative 3' splice site	25133756	25133851	+	Chr1:25132887-25138125W	PB.583.1,PB.583.2
Chr1	Intron retention	25133030	25133851	+	Chr1:25132887-25138125W	PB.583.3,PB.583.2
Chr1	Exon skipping	25700122	25700396	+	Chr1:25696671-25705081W	PB.595.1/PB.595.2,PB.595.3
Chr1	Intron retention	26392270	26392353	+	Chr1:26392164-26396072W	PB.610.1,PB.610.2
Chr1	Alternative 3' splice site	26449682	26449787	+	Chr1:26449260-26452738W	PB.612.2,PB.612.1
Chr1	Intron retention	26528759	26529296	+	Chr1:26527475-26532049W	PB.616.2,PB.616.1
Chr1	Alternative 3' splice site	27126516	27126524	+	Chr1:27123464-27129399W	PB.634.1,PB.634.2
Chr1	Intron retention	28732547	28732643	+	Chr1:28729115-28735112W	PB.685.2,PB.685.3/PB.685.4/PB.685.5
Chr1	Intron retention	28732720	28732991	+	Chr1:28729115-28735112W	PB.685.1,PB.685.3/PB.685.4/PB.685.5
Chr1	Intron retention	29409233	29409781	+	Chr1:29405660-29411401W	PB.709.1,PB.709.2
Chr1	Alternative 3' splice site	29409149	29409155	+	Chr1:29405660-29411401W	PB.709.3,PB.709.1
Chr1	Alternative 5' splice site	29503404	29503431	+	Chr1:29501126-29506962W	PB.716.1,PB.716.2/PB.716.3
Chr1	Intron retention	29564417	29565030	+	Chr1:29560264-29566661W	PB.722.4,PB.722.1/PB.722.2
Chr1	Alternative 5' splice site	29876780	29876821	+	Chr1:29874472-29877456W	PB.727.3,PB.727.1/PB.727.2
Chr1	Alternative 3' splice site	30170246	30170248	+	Chr1:30166017-30171658W	PB.740.1/PB.740.4,PB.740.3
Chr1	Alternative 5' splice site	30261160	30261183	+	Chr1:30258685-30263365W	PB.742.1,PB.742.2
Chr1	Intron retention	30362202	30362748	+	Chr1:30361827-30364093W	PB.747.3,PB.747.2
Chr1	Alternative 3' splice site	32452505	32452509	+	Chr1:32450869-32456505W	PB.825.1,PB.825.2
Chr1	Intron retention	33838129	33838212	+	Chr1:33837392-33840421W	PB.884.1,PB.884.2
Chr1	Alternative 5' splice site	35904983	35905225	+	Chr1:35902948-35908341W	PB.966.1,PB.966.2
Chr1	Alternative 3' splice site	35906444	35906447	+	Chr1:35902948-35908341W	PB.966.2,PB.966.1
Chr1	Alternative 5' splice site	36356326	36356335	+	Chr1:36353106-36358624W	PB.987.2,PB.987.1
Chr1	Alternative 3' splice site	36998984	36998987	+	Chr1:36998625-37004730W	PB.1013.3,PB.1013.2
Chr1	Intron retention	37272021	37272543	+	Chr1:37270003-37274715W	PB.1024.2,PB.1024.1/PB.1024.4
Chr1	Exon skipping	37272543	37272747	+	Chr1:37270003-37274715W	PB.1024.5,PB.1024.1/PB.1024.4
Chr1	Alternative 5' splice site	37272021	37272747	+	Chr1:37270003-37274715W	PB.1024.5,PB.1024.2
Chr1	Intron retention	37520497	37520902	+	Chr1:37519607-37522440W	PB.1035.1,PB.1035.2
Chr1	Alternative 3' splice site	38053105	38053125	+	Chr1:38048037-38054501W	PB.1068.4,PB.1068.3
Chr1	Intron retention	38845035	38845295	+	Chr1:38843727-38846549W	PB.1104.2,PB.1104.1
Chr1	Alternative 3' splice site	39779209	39779213	+	Chr1:39777757-39779889W	PB.1149.3,PB.1149.2
Chr1	Exon skipping	40128522	40128785	+	Chr1:40127410-40132444W	PB.1167.3,PB.1167.2
Chr1	Intron retention	40129525	40129562	+	Chr1:40127410-40132444W	PB.1167.2/PB.1167.3,PB.1167.1/PB.1167.4
Chr1	Exon skipping	41440792	41440866	+	Chr1:41439301-41447115W	PB.1224.4,PB.1224.1/PB.1224.3
Chr1	Intron retention	41440713	41441116	+	Chr1:41439301-41447115W	PB.1224.2,PB.1224.1/PB.1224.3
Chr1	Intron retention	41440713	41441116	+	Chr1:41439301-41447115W	PB.1224.2,PB.1224.4
Chr1	Intron retention	41445246	41445335	+	Chr1:41439301-41447115W	PB.1224.2/PB.1224.3,PB.1224.1/PB.1224.4
Chr1	Intron retention	42230254	42230344	+	Chr1:42229526-42232690W	PB.1252.2,PB.1252.1/PB.1252.3
Chr1	Intron retention	43042025	43042852	+	Chr1:43039985-43043965W	PB.1295.2,PB.1295.1
Chr1	Alternative 3' splice site	251090	251082	-	Chr1:248707-256574C	PB.21.2,PB.21.1
Chr1	Alternative 3' splice site	2267824	2267588	-	Chr1:2266360-2271050C	PB.87.1,PB.87.2
Chr1	Intron retention	2988760	2988273	-	Chr1:2986328-2989305C	PB.110.2,PB.110.1/PB.110.3
Chr1	Alternative 5' splice site	2987469	2987463	-	Chr1:2986328-2989305C	PB.110.1,PB.110.2
Chr1	Alternative 5' splice site	2987472	2987469	-	Chr1:2986328-2989305C	PB.110.3,PB.110.1
Chr1	Alternative 5' splice site	2987472	2987463	-	Chr1:2986328-2989305C	PB.110.3,PB.110.2
Chr1	Alternative 3' splice site	3101089	3101048	-	Chr1:3100293-3105238C	PB.117.1,PB.117.3
Chr1	Intron retention	3448314	3448059	-	Chr1:3446935-3450182C	PB.127.2,PB.127.1/PB.127.3
Chr1	Alternative 3' splice site	3671354	3671308	-	Chr1:3667476-3673015C	PB.135.2,PB.135.1
Chr1	Alternative 5' splice site	3669571	3669567	-	Chr1:3667476-3673015C	PB.135.1,PB.135.2
Chr1	Intron retention	4330752	4330551	-	Chr1:4329360-4338487C	PB.156.1,PB.156.2
Chr1	Alternative 3' splice site	7088080	7087868	-	Chr1:7085796-7089189C	PB.228.2,PB.228.1
Chr1	Exon skipping	7108065	7107973	-	Chr1:7104701-7109189C	PB.231.2,PB.231.1
Chr1	Intron retention	8253194	8252947	-	Chr1:8250759-8263539C	PB.267.1,PB.267.2
Chr1	Alternative 3' splice site	8252324	8252317	-	Chr1:8250759-8263539C	PB.267.2,PB.267.1
Chr1	Intron retention	8372958	8372864	-	Chr1:8367174-8375443C	PB.275.2/PB.275.3,PB.275.1
Chr1	Intron retention	8369036	8368873	-	Chr1:8367174-8375443C	PB.275.3,PB.275.1/PB.275.2
Chr1	Alternative 5' splice site	9138088	9138083	-	Chr1:9133740-9140430C	PB.299.3/PB.299.4,PB.299.1
Chr1	Exon skipping	9137998	9137900	-	Chr1:9133740-9140430C	PB.299.2,PB.299.3/PB.299.4
Chr1	Intron retention	9135965	9135790	-	Chr1:9133740-9140430C	PB.299.3,PB.299.2/PB.299.4
Chr1	Intron retention	9135965	9135600	-	Chr1:9133740-9140430C	PB.299.1,PB.299.2/PB.299.4
Chr1	Intron retention	9135732	9135600	-	Chr1:9133740-9140430C	PB.299.1,PB.299.3
Chr1	Exon skipping	9637869	9637832	-	Chr1:9630974-9638907C	PB.310.4,PB.310.3
Chr1	Intron retention	10273793	10273776	-	Chr1:10270992-10274432C	PB.330.3/PB.330.4,PB.330.1/PB.330.2/PB.330.5
Chr1	Intron retention	10271964	10271833	-	Chr1:10270992-10274432C	PB.330.2/PB.330.3/PB.330.5,PB.330.1
Chr1	Alternative 3' splice site	10272183	10272168	-	Chr1:10270992-10274432C	PB.330.4,PB.330.2/PB.330.3/PB.330.5
Chr1	Intron retention	14622460	14622324	-	Chr1:14621296-14627934C	PB.395.2,PB.395.1/PB.395.3
Chr1	Intron retention	15023709	15023461	-	Chr1:15019807-15023785C	PB.399.1,PB.399.2
Chr1	Intron retention	20600791	20600111	-	Chr1:20599373-20602200C	PB.468.2,PB.468.1/PB.468.3/PB.468.5/PB.468.6
Chr1	Intron retention	21076494	21076409	-	Chr1:21071456-21076725C	PB.473.2,PB.473.3
Chr1	Intron retention	22822098	22821997	-	Chr1:22820303-22822583C	PB.516.2,PB.516.3
Chr1	Intron retention	24247163	24247056	-	Chr1:24245934-24249361C	PB.550.1,PB.550.2
Chr1	Intron retention	24638000	24637861	-	Chr1:24633725-24639245C	PB.564.1,PB.564.2
Chr1	Exon skipping	24637861	24637807	-	Chr1:24633725-24639245C	PB.564.3,PB.564.2
Chr1	Alternative 5' splice site	24638000	24637807	-	Chr1:24633725-24639245C	PB.564.3,PB.564.1
Chr1	Intron retention	24768089	24767954	-	Chr1:24763080-24768257C	PB.568.1,PB.568.2
Chr1	Intron retention	24864166	24863952	-	Chr1:24861575-24869907C	PB.573.3,PB.573.4
Chr1	Intron retention	29208427	29208176	-	Chr1:29206440-29209611C	PB.703.1/PB.703.2,PB.703.3
Chr1	Exon skipping	29488742	29488644	-	Chr1:29483242-29492532C	PB.715.1/PB.715.2,PB.715.3/PB.715.4
Chr1	Intron retention	29488161	29487996	-	Chr1:29483242-29492532C	PB.715.1/PB.715.4,PB.715.2/PB.715.3
Chr1	Alternative 3' splice site	29805727	29805625	-	Chr1:29801080-29806966C	PB.725.1/PB.725.2,PB.725.3
Chr1	Intron retention	29844555	29844048	-	Chr1:29842825-29846824C	PB.726.3,PB.726.1/PB.726.2
Chr1	Alternative 3' splice site	29843598	29843594	-	Chr1:29842825-29846824C	PB.726.1/PB.726.2,PB.726.3
Chr1	Alternative 5' splice site	29969294	29969244	-	Chr1:29965131-29970770C	PB.731.2/PB.731.8,PB.731.4
Chr1	Intron retention	29969294	29969133	-	Chr1:29965131-29970770C	PB.731.3,PB.731.2/PB.731.8
Chr1	Intron retention	29969244	29969133	-	Chr1:29965131-29970770C	PB.731.3,PB.731.4
Chr1	Alternative 5' splice site	29967450	29967446	-	Chr1:29965131-29970770C	PB.731.1/PB.731.2/PB.731.3/PB.731.4/PB.731.5/PB.731.7/PB.731.8,PB.731.6
Chr1	Alternative 5' splice site	31129384	31129371	-	Chr1:31120708-31132859C	PB.775.1,PB.775.2
Chr1	Exon skipping	31675468	31674561	-	Chr1:31672195-31676322C	PB.799.1,PB.799.2
Chr1	Intron retention	31740706	31740568	-	Chr1:31737828-31742792C	PB.801.3,PB.801.1/PB.801.2
Chr1	Intron retention	32588362	32587794	-	Chr1:32586925-32591877C	PB.832.2,PB.832.1
Chr1	Intron retention	32914097	32913998	-	Chr1:32912898-32925568C	PB.845.1,PB.845.2
Chr1	Alternative 3' splice site	34159076	34159072	-	Chr1:34153335-34160037C	PB.897.2,PB.897.1
Chr1	Intron retention	35304885	35304734	-	Chr1:35303183-35305739C	PB.932.1/PB.932.2/PB.932.4,PB.932.3
Chr1	Intron retention	35389781	35389710	-	Chr1:35386817-35391691C	PB.934.1,PB.934.2
Chr1	Alternative 5' splice site	37026510	37026476	-	Chr1:37023767-37031691C	PB.1016.2,PB.1016.1
Chr1	Intron retention	37119708	37119429	-	Chr1:37118441-37123070C	PB.1020.2,PB.1020.1
Chr1	Intron retention	37620186	37619557	-	Chr1:37616682-37622066C	PB.1045.3,PB.1045.1/PB.1045.2
Chr1	Alternative 3' splice site	38029383	38029365	-	Chr1:38027299-38030252C	PB.1066.1,PB.1066.2
Chr1	Alternative 3' splice site	38660442	38660435	-	Chr1:38659427-38663603C	PB.1098.2,PB.1098.1
Chr1	Intron retention	39054992	39054977	-	Chr1:39052287-39058923C	PB.1120.2,PB.1120.1
Chr1	Intron retention	39688643	39688559	-	Chr1:39688368-39691674C	PB.1144.2,PB.1144.3
Chr1	Intron retention	39914399	39914382	-	Chr1:39914231-39916482C	PB.1155.1,PB.1155.2
Chr1	Alternative 3' splice site	40057100	40057067	-	Chr1:40056054-40059535C	PB.1161.1,PB.1161.2
Chr1	Intron retention	40861248	40860991	-	Chr1:40858509-40861827C	PB.1200.1/PB.1200.3,PB.1200.2
Chr1	Alternative 3' splice site	40860227	40860178	-	Chr1:40858509-40861827C	PB.1200.2/PB.1200.3,PB.1200.1
Chr1	Alternative 3' splice site	41577781	41577717	-	Chr1:41573944-41578834C	PB.1228.1,PB.1228.2
Chr1	Intron retention	43237162	43237080	-	Chr1:43231943-43238001C	PB.1305.4,PB.1305.1/PB.1305.2/PB.1305.3
Chr10	Alternative 5' splice site	2885830	2885945	+	Chr10:2885464-2886595W	PB.1340.2,PB.1340.1
Chr10	Intron retention	6147693	6147963	+	Chr10:6144694-6150474W	PB.1375.1,PB.1375.2
Chr10	Alternative 3' splice site	6148400	6148407	+	Chr10:6144694-6150474W	PB.1375.2,PB.1375.1
Chr10	Alternative 3' splice site	7576555	7576577	+	Chr10:7574038-7579886W	PB.1384.1,PB.1384.2
Chr10	Alternative 3' splice site	7577240	7577262	+	Chr10:7574038-7579886W	PB.1384.2,PB.1384.1
Chr10	Intron retention	9331056	9331246	+	Chr10:9330685-9336368W	PB.1400.2,PB.1400.1
Chr10	Alternative 3' splice site	9330920	9331245	+	Chr10:9330685-9336368W	PB.1400.2,PB.1400.3
Chr10	Intron retention	10093055	10093324	+	Chr10:10089445-10095043W	PB.1404.4,PB.1404.1/PB.1404.2/PB.1404.3
Chr10	Intron retention	10172601	10173103	+	Chr10:10170502-10174446W	PB.1405.4,PB.1405.1/PB.1405.3/PB.1405.5
Chr10	Intron retention	10384859	10385015	+	Chr10:10382904-10388216W	PB.1406.1,PB.1406.2
Chr10	Alternative 3' splice site	10933045	10933074	+	Chr10:10932198-10939174W	PB.1415.3,PB.1415.1/PB.1415.2
Chr10	Intron retention	10935623	10935744	+	Chr10:10932198-10939174W	PB.1415.1/PB.1415.3,PB.1415.2
Chr10	Alternative 5' splice site	14097858	14097876	+	Chr10:14095462-14107002W	PB.1453.2,PB.1453.1
Chr10	Intron retention	16235625	16235656	+	Chr10:16225412-16238843W	PB.1495.2/PB.1495.3/PB.1495.5,PB.1495.4
Chr10	Intron retention	17048409	17049013	+	Chr10:17048057-17053444W	PB.1514.2,PB.1514.1/PB.1514.3
Chr10	Intron retention	17264872	17264953	+	Chr10:17261952-17266609W	PB.1525.1/PB.1525.2/PB.1525.3/PB.1525.7,PB.1525.5
Chr10	Intron retention	17264880	17264958	+	Chr10:17261952-17266609W	PB.1525.1/PB.1525.2/PB.1525.3/PB.1525.7,PB.1525.6
Chr10	Alternative 3' splice site	19622891	19622894	+	Chr10:19621595-19626165W	PB.1604.2,PB.1604.3
Chr10	Alternative 3' splice site	20298983	20299155	+	Chr10:20295308-20299471W	PB.1625.1,PB.1625.2
Chr10	Intron retention	20938861	20939347	+	Chr10:20936580-20940420W	PB.1648.2,PB.1648.1
Chr10	Intron retention	23029895	23029970	+	Chr10:23025700-23031723W	PB.1721.1,PB.1721.2
Chr10	Alternative 3' splice site	23114932	23115091	+	Chr10:23114085-23117752W	PB.1731.3,PB.1731.1/PB.1731.2
Chr10	Intron retention	790376	790029	-	Chr10:786104-791232C	PB.1316.3,PB.1316.1/PB.1316.2/PB.1316.4
Chr10	Alternative 5' splice site	1011169	1009700	-	Chr10:1007651-1012945C	PB.1322.3,PB.1322.2
Chr10	Intron retention	1009700	1009540	-	Chr10:1007651-1012945C	PB.1322.1,PB.1322.2
Chr10	Intron retention	1011169	1009540	-	Chr10:1007651-1012945C	PB.1322.1,PB.1322.3
Chr10	Intron retention	4642093	4642016	-	Chr10:4639798-4644295C	PB.1364.2,PB.1364.1
Chr10	Intron retention	11607390	11607305	-	Chr10:11605119-11609041C	PB.1426.1,PB.1426.2
Chr10	Alternative 3' splice site	11694036	11694029	-	Chr10:11691436-11695051C	PB.1428.2,PB.1428.1
Chr10	Alternative 3' splice site	13114904	13114879	-	Chr10:13112735-13115215C	PB.1442.1,PB.1442.3
Chr10	Intron retention	14358250	14358168	-	Chr10:14357019-14362443C	PB.1458.2,PB.1458.1/PB.1458.3/PB.1458.4
Chr10	Exon skipping	14748032	14747940	-	Chr10:14746095-14750051C	PB.1470.2/PB.1470.4/PB.1470.6,PB.1470.1/PB.1470.5
Chr10	Intron retention	14747940	14747823	-	Chr10:14746095-14750051C	PB.1470.3,PB.1470.1/PB.1470.5
Chr10	Alternative 3' splice site	14748032	14747823	-	Chr10:14746095-14750051C	PB.1470.3,PB.1470.2
Chr10	Alternative 5' splice site	14746977	14746883	-	Chr10:14746095-14750051C	PB.1470.5,PB.1470.6
Chr10	Alternative 3' splice site	14746816	14746670	-	Chr10:14746095-14750051C	PB.1470.5,PB.1470.1/PB.1470.2/PB.1470.3
Chr10	Intron retention	14746883	14746816	-	Chr10:14746095-14750051C	PB.1470.4,PB.1470.6
Chr10	Intron retention	14746977	14746670	-	Chr10:14746095-14750051C	PB.1470.4,PB.1470.1/PB.1470.2
Chr10	Intron retention	14746977	14746816	-	Chr10:14746095-14750051C	PB.1470.4,PB.1470.5
Chr10	Intron retention	16671984	16670122	-	Chr10:16665813-16673468C	PB.1501.2,PB.1501.1
Chr10	Alternative 5' splice site	17453638	17453560	-	Chr10:17448950-17454772C	PB.1532.2,PB.1532.1/PB.1532.3
Chr10	Intron retention	17773663	17773486	-	Chr10:17773251-17776698C	PB.1539.2,PB.1539.1
Chr10	Alternative 3' splice site	19353911	19353908	-	Chr10:19352993-19354080C	PB.1595.1,PB.1595.2
Chr10	Intron retention	20030871	20029347	-	Chr10:20028687-20031215C	PB.1616.3,PB.1616.1
Chr10	Intron retention	20623135	20623041	-	Chr10:20622453-20623520C	PB.1636.1,PB.1636.2
Chr10	Intron retention	22174995	22174939	-	Chr10:22174713-22176685C	PB.1682.1,PB.1682.2
Chr10	Intron retention	23036657	23036368	-	Chr10:23035346-23039702C	PB.1723.1,PB.1723.2/PB.1723.3
Chr11	Intron retention	227419	227489	+	Chr11:227395-231891W	PB.1745.1,PB.1745.2
Chr11	Alternative 3' splice site	1604966	1604971	+	Chr11:1603696-1609149W	PB.1786.1,PB.1786.2
Chr11	Alternative 5' splice site	1607109	1607146	+	Chr11:1603696-1609149W	PB.1786.2,PB.1786.1
Chr11	Exon skipping	2734933	2735084	+	Chr11:2730101-2736639W	PB.1818.2,PB.1818.1/PB.1818.3/PB.1818.4
Chr11	Exon skipping	4227102	4227424	+	Chr11:4220803-4229480W	PB.1849.2,PB.1849.1
Chr11	Intron retention	6064447	6064523	+	Chr11:6059350-6065402W	PB.1883.2,PB.1883.1
Chr11	Intron retention	7660186	7660731	+	Chr11:7655567-7662214W	PB.1895.3,PB.1895.2/PB.1895.5
Chr11	Alternative 3' splice site	7932199	7932214	+	Chr11:7931830-7935699W	PB.1898.1,PB.1898.2
Chr11	Intron retention	15722089	15722254	+	Chr11:15706818-15738092W	PB.1950.1,PB.1950.2
Chr11	Alternative 3' splice site	22631204	22631213	+	Chr11:22630935-22637797W	PB.2026.1/PB.2026.2,PB.2026.3
Chr11	Alternative 3' splice site	23910993	23911026	+	Chr11:23909901-23913301W	PB.2047.2,PB.2047.1
Chr11	Alternative 3' splice site	26301491	26301509	+	Chr11:26299997-26305712W	PB.2074.1,PB.2074.2
Chr11	Exon skipping	27593867	27594100	+	Chr11:27590944-27596209W	PB.2094.2,PB.2094.5
Chr11	Intron retention	27594100	27594187	+	Chr11:27590944-27596209W	PB.2094.3,PB.2094.5
Chr11	Alternative 3' splice site	27593867	27594187	+	Chr11:27590944-27596209W	PB.2094.3,PB.2094.2
Chr11	Intron retention	27831314	27831333	+	Chr11:27828598-27835246W	PB.2096.1,PB.2096.2/PB.2096.3
Chr11	Alternative 3' splice site	301399	301342	-	Chr11:295728-301624C	PB.1749.3,PB.1749.4
Chr11	Intron retention	3279396	3279313	-	Chr11:3278419-3279419C	PB.1827.1,PB.1827.2
Chr11	Intron retention	3384606	3384481	-	Chr11:3382385-3388918C	PB.1834.5,PB.1834.1/PB.1834.2
Chr11	Intron retention	3490468	3490291	-	Chr11:3488553-3491706C	PB.1838.2/PB.1838.6/PB.1838.7,PB.1838.1/PB.1838.3/PB.1838.4/PB.1838.5/PB.1838.8
Chr11	Intron retention	3489987	3489885	-	Chr11:3488553-3491706C	PB.1838.3,PB.1838.1/PB.1838.2/PB.1838.4/PB.1838.5/PB.1838.8
Chr11	Intron retention	3672823	3672735	-	Chr11:3668116-3673487C	PB.1840.3,PB.1840.2
Chr11	Alternative 3' splice site	7586341	7586323	-	Chr11:7584532-7588363C	PB.1894.1,PB.1894.2
Chr11	Intron retention	7586429	7586341	-	Chr11:7584532-7588363C	PB.1894.3,PB.1894.1
Chr11	Intron retention	7586429	7586323	-	Chr11:7584532-7588363C	PB.1894.3,PB.1894.2
Chr11	Alternative 3' splice site	8201189	8201172	-	Chr11:8198316-8201896C	PB.1901.1/PB.1901.4,PB.1901.2
Chr11	Alternative 3' splice site	8201189	8201160	-	Chr11:8198316-8201896C	PB.1901.1/PB.1901.4,PB.1901.3
Chr11	Alternative 3' splice site	8201172	8201160	-	Chr11:8198316-8201896C	PB.1901.2,PB.1901.3
Chr11	Intron retention	20106557	20106540	-	Chr11:20098046-20106796C	PB.1996.1,PB.1996.2
Chr11	Alternative 3' splice site	22269584	22269571	-	Chr11:22267510-22271460C	PB.2021.3,PB.2021.2
Chr11	Intron retention	22270104	22269571	-	Chr11:22267510-22271460C	PB.2021.1,PB.2021.2
Chr11	Intron retention	22270104	22269584	-	Chr11:22267510-22271460C	PB.2021.1,PB.2021.3
Chr11	Alternative 3' splice site	22268831	22268817	-	Chr11:22267510-22271460C	PB.2021.2/PB.2021.3,PB.2021.1
Chr11	Alternative 5' splice site	25152280	25152276	-	Chr11:25148711-25153277C	PB.2058.2,PB.2058.1
Chr11	Exon skipping	27654478	27654127	-	Chr11:27649671-27655226C	PB.2095.4,PB.2095.1/PB.2095.2/PB.2095.3
Chr11	Intron retention	27651032	27650851	-	Chr11:27649671-27655226C	PB.2095.4,PB.2095.3
Chr11	Intron retention	28934299	28933953	-	Chr11:28932862-28936240C	PB.2112.7,PB.2112.1/PB.2112.3/PB.2112.6
Chr11	Exon skipping	28933953	28933869	-	Chr11:28932862-28936240C	PB.2112.2/PB.2112.4/PB.2112.5,PB.2112.1/PB.2112.3/PB.2112.6
Chr11	Alternative 5' splice site	28934299	28933869	-	Chr11:28932862-28936240C	PB.2112.2/PB.2112.4/PB.2112.5,PB.2112.7
Chr11	Intron retention	28991835	28991657	-	Chr11:28989446-28997865C	PB.2118.1,PB.2118.2
Chr12	Intron retention	99119	99207	+	Chr12:96667-99852W	PB.2120.2,PB.2120.1
Chr12	Intron retention	339898	339996	+	Chr12:337906-341480W	PB.2135.3,PB.2135.1/PB.2135.2
Chr12	Alternative 3' splice site	470437	470445	+	Chr12:469532-472397W	PB.2143.1,PB.2143.2
Chr12	Alternative 5' splice site	896884	896885	+	Chr12:894710-898395W	PB.2167.1,PB.2167.3
Chr12	Intron retention	915432	915511	+	Chr12:912486-1024162W	PB.2168.1/PB.2168.2,PB.2168.3
Chr12	Alternative 5' splice site	1558100	1558146	+	Chr12:1554897-1560320W	PB.2188.3,PB.2188.1
Chr12	Alternative 5' splice site	1558281	1558318	+	Chr12:1554897-1560320W	PB.2188.3,PB.2188.1
Chr12	Intron retention	1558146	1558604	+	Chr12:1554897-1560320W	PB.2188.2,PB.2188.1
Chr12	Intron retention	1558100	1558604	+	Chr12:1554897-1560320W	PB.2188.2,PB.2188.3
Chr12	Alternative 3' splice site	1891489	1891502	+	Chr12:1889024-1894819W	PB.2197.1,PB.2197.2
Chr12	Intron retention	2781162	2781774	+	Chr12:2780542-2783691W	PB.2223.2,PB.2223.1
Chr12	Alternative 3' splice site	4708388	4708392	+	Chr12:4706911-4711281W	PB.2277.1,PB.2277.2
Chr12	Alternative 3' splice site	6677836	6677867	+	Chr12:6677660-6679773W	PB.2287.1,PB.2287.2
Chr12	Intron retention	7390424	7390895	+	Chr12:7389672-7393850W	PB.2295.2,PB.2295.1
Chr12	Alternative 3' splice site	9908953	9908955	+	Chr12:9907424-9915064W	PB.2317.1,PB.2317.2
Chr12	Intron retention	10051310	10052556	+	Chr12:10048881-10052910W	PB.2319.1,PB.2319.2
Chr12	Intron retention	10772573	10772647	+	Chr12:10770983-10775339W	PB.2325.5,PB.2325.6
Chr12	Intron retention	10772573	10772647	+	Chr12:10770983-10775339W	PB.2325.7,PB.2325.2/PB.2325.3/PB.2325.4
Chr12	Intron retention	19427068	19427886	+	Chr12:19424798-19428462W	PB.2387.1,PB.2387.2
Chr12	Intron retention	22631890	22631991	+	Chr12:22628790-22632962W	PB.2435.2,PB.2435.1
Chr12	Alternative 3' splice site	23932524	23932595	+	Chr12:23931346-23935582W	PB.2479.1,PB.2479.2
Chr12	Exon skipping	25094294	25094458	+	Chr12:25091762-25098252W	PB.2501.1,PB.2501.2
Chr12	Intron retention	26650129	26650198	+	Chr12:26645021-26662992W	PB.2532.5,PB.2532.14/PB.2532.15/PB.2532.17/PB.2532.2/PB.2532.3/PB.2532.8
Chr12	Alternative 3' splice site	27387199	27387222	+	Chr12:27386957-27393763W	PB.2551.2,PB.2551.3
Chr12	Alternative 5' splice site	27468504	27468525	+	Chr12:27464737-27471671W	PB.2556.1,PB.2556.2
Chr12	Alternative 5' splice site	442996	442970	-	Chr12:439124-443732C	PB.2141.2,PB.2141.4/PB.2141.5
Chr12	Alternative 3' splice site	709050	709037	-	Chr12:707625-715416C	PB.2155.1,PB.2155.2
Chr12	Alternative 3' splice site	890082	890062	-	Chr12:885100-890850C	PB.2166.1/PB.2166.4,PB.2166.3
Chr12	Alternative 5' splice site	889285	889280	-	Chr12:885100-890850C	PB.2166.1/PB.2166.3,PB.2166.4
Chr12	Intron retention	927227	927142	-	Chr12:921739-927897C	PB.2169.2/PB.2169.3/PB.2169.6,PB.2169.4
Chr12	Intron retention	926839	926731	-	Chr12:921739-927897C	PB.2169.1/PB.2169.5,PB.2169.2/PB.2169.3/PB.2169.6
Chr12	Intron retention	927227	926731	-	Chr12:921739-927897C	PB.2169.1/PB.2169.5,PB.2169.4
Chr12	Intron retention	992709	992593	-	Chr12:991474-996319C	PB.2170.2,PB.2170.1/PB.2170.3/PB.2170.4
Chr12	Intron retention	1008995	1008583	-	Chr12:1002041-1011140C	PB.2171.4,PB.2171.1/PB.2171.2/PB.2171.3
Chr12	Alternative 3' splice site	1223308	1223193	-	Chr12:1220955-1225096C	PB.2180.3,PB.2180.1/PB.2180.2
Chr12	Intron retention	1221962	1221876	-	Chr12:1220955-1225096C	PB.2180.1,PB.2180.2/PB.2180.3
Chr12	Alternative 3' splice site	1300703	1300691	-	Chr12:1292697-1300937C	PB.2183.1/PB.2183.3,PB.2183.2
Chr12	Intron retention	1407907	1407433	-	Chr12:1405141-1409360C	PB.2186.1,PB.2186.2
Chr12	Intron retention	2597820	2597572	-	Chr12:2595546-2600078C	PB.2218.2,PB.2218.1
Chr12	Alternative 3' splice site	14904150	14904144	-	Chr12:14897126-14904508C	PB.2364.2,PB.2364.1
Chr12	Intron retention	16198301	16198180	-	Chr12:16196138-16199456C	PB.2366.2/PB.2366.7,PB.2366.1
Chr12	Intron retention	16198027	16197469	-	Chr12:16196138-16199456C	PB.2366.6,PB.2366.1
Chr12	Exon skipping	16197919	16197378	-	Chr12:16196138-16199456C	PB.2366.2/PB.2366.7,PB.2366.1
Chr12	Intron retention	16197378	16197252	-	Chr12:16196138-16199456C	PB.2366.4/PB.2366.5/PB.2366.9,PB.2366.6
Chr12	Intron retention	16198027	16197252	-	Chr12:16196138-16199456C	PB.2366.4/PB.2366.5/PB.2366.9,PB.2366.1
Chr12	Intron retention	16196768	16196672	-	Chr12:16196138-16199456C	PB.2366.5/PB.2366.7,PB.2366.1/PB.2366.6/PB.2366.9
Chr12	Intron retention	16196945	16196672	-	Chr12:16196138-16199456C	PB.2366.4,PB.2366.1/PB.2366.6/PB.2366.9
Chr12	Intron retention	16196945	16196865	-	Chr12:16196138-16199456C	PB.2366.4,PB.2366.5/PB.2366.7
Chr12	Intron retention	16197096	16196672	-	Chr12:16196138-16199456C	PB.2366.2,PB.2366.1/PB.2366.6
Chr12	Intron retention	16197096	16196865	-	Chr12:16196138-16199456C	PB.2366.2,PB.2366.7
Chr12	Intron retention	16197096	16197009	-	Chr12:16196138-16199456C	PB.2366.8,PB.2366.4
Chr12	Intron retention	16197096	16196672	-	Chr12:16196138-16199456C	PB.2366.8,PB.2366.9
Chr12	Intron retention	16197096	16196865	-	Chr12:16196138-16199456C	PB.2366.8,PB.2366.5
Chr12	Intron retention	16197378	16196672	-	Chr12:16196138-16199456C	PB.2366.8,PB.2366.6
Chr12	Intron retention	16198027	16196672	-	Chr12:16196138-16199456C	PB.2366.8,PB.2366.1
Chr12	Intron retention	16198027	16197252	-	Chr12:16196138-16199456C	PB.2366.3,PB.2366.2
Chr12	Intron retention	16198027	16196865	-	Chr12:16196138-16199456C	PB.2366.3,PB.2366.7
Chr12	Intron retention	16198301	16198180	-	Chr12:16196138-16199456C	PB.2366.3,PB.2366.8
Chr12	Intron retention	16198301	16197009	-	Chr12:16196138-16199456C	PB.2366.3,PB.2366.4
Chr12	Intron retention	16198301	16196672	-	Chr12:16196138-16199456C	PB.2366.3,PB.2366.9
Chr12	Intron retention	16198301	16196865	-	Chr12:16196138-16199456C	PB.2366.3,PB.2366.5
Chr12	Intron retention	16198301	16196672	-	Chr12:16196138-16199456C	PB.2366.3,PB.2366.6
Chr12	Intron retention	16198301	16196672	-	Chr12:16196138-16199456C	PB.2366.3,PB.2366.1
Chr12	Intron retention	23326723	23326594	-	Chr12:23325612-23327055C	PB.2460.1,PB.2460.2
Chr12	Alternative 3' splice site	23591995	23591268	-	Chr12:23589654-23592536C	PB.2469.3,PB.2469.1
Chr12	Intron retention	23592166	23591268	-	Chr12:23589654-23592536C	PB.2469.2,PB.2469.1
Chr12	Intron retention	23592166	23591995	-	Chr12:23589654-23592536C	PB.2469.2,PB.2469.3
Chr12	Intron retention	23806376	23806308	-	Chr12:23805102-23808751C	PB.2475.1,PB.2475.2/PB.2475.3
Chr12	Alternative 3' splice site	23813070	23813063	-	Chr12:23810530-23814363C	PB.2476.1,PB.2476.2
Chr12	Alternative 3' splice site	23824767	23824734	-	Chr12:23823822-23829461C	PB.2477.2,PB.2477.1
Chr12	Intron retention	25891616	25891224	-	Chr12:25888953-25892988C	PB.2511.2,PB.2511.1
Chr12	Alternative 5' splice site	26373226	26373222	-	Chr12:26369206-26374622C	PB.2524.3,PB.2524.1
Chr12	Intron retention	26703025	26702879	-	Chr12:26698649-26703087C	PB.2534.1,PB.2534.2
Chr12	Intron retention	27482839	27482717	-	Chr12:27480558-27486531C	PB.2557.1/PB.2557.3,PB.2557.2
Chr2	Alternative 3' splice site	14376	14379	+	Chr2:14089-18490W	PB.2565.3,PB.2565.1/PB.2565.4
Chr2	Intron retention	16094	16122	+	Chr2:14089-18490W	PB.2565.3,PB.2565.4
Chr2	Intron retention	15694	15995	+	Chr2:14089-18490W	PB.2565.1,PB.2565.3
Chr2	Intron retention	15694	16122	+	Chr2:14089-18490W	PB.2565.1,PB.2565.4
Chr2	Intron retention	161537	161612	+	Chr2:158616-163708W	PB.2577.3,PB.2577.1/PB.2577.2
Chr2	Intron retention	1327187	1328060	+	Chr2:1326925-1330305W	PB.2631.3,PB.2631.2
Chr2	Intron retention	1328431	1329393	+	Chr2:1326925-1330305W	PB.2631.2,PB.2631.1
Chr2	Exon skipping	1971378	1971470	+	Chr2:1967721-1972807W	PB.2653.2,PB.2653.1
Chr2	Alternative 5' splice site	2107898	2107931	+	Chr2:2105663-2110542W	PB.2662.5,PB.2662.1/PB.2662.4
Chr2	Intron retention	2107931	2108367	+	Chr2:2105663-2110542W	PB.2662.6,PB.2662.1/PB.2662.4
Chr2	Intron retention	2107898	2108367	+	Chr2:2105663-2110542W	PB.2662.6,PB.2662.5
Chr2	Intron retention	2617287	2617465	+	Chr2:2614250-2619026W	PB.2675.1,PB.2675.2
Chr2	Intron retention	2617631	2617808	+	Chr2:2614250-2619026W	PB.2675.1,PB.2675.2
Chr2	Alternative 5' splice site	2622618	2622622	+	Chr2:2620406-2626227W	PB.2676.2,PB.2676.1
Chr2	Intron retention	3729195	3729295	+	Chr2:3727543-3739634W	PB.2716.3,PB.2716.2/PB.2716.4/PB.2716.5
Chr2	Alternative 3' splice site	3798422	3798424	+	Chr2:3797538-3800885W	PB.2718.2/PB.2718.3/PB.2718.4,PB.2718.1
Chr2	Alternative 3' splice site	3798759	3798768	+	Chr2:3797538-3800885W	PB.2718.1,PB.2718.2/PB.2718.3/PB.2718.4
Chr2	Intron retention	4282105	4282217	+	Chr2:4280496-4285945W	PB.2734.2,PB.2734.1/PB.2734.3
Chr2	Alternative 5' splice site	5624430	5624434	+	Chr2:5623280-5627346W	PB.2782.2,PB.2782.1
Chr2	Exon skipping	7273531	7273727	+	Chr2:7272964-7278257W	PB.2813.1,PB.2813.2
Chr2	Intron retention	7624084	7624241	+	Chr2:7621905-7627260W	PB.2819.3,PB.2819.1/PB.2819.2
Chr2	Intron retention	7626403	7626516	+	Chr2:7621905-7627260W	PB.2819.3,PB.2819.1/PB.2819.2
Chr2	Intron retention	9849712	9849818	+	Chr2:9848823-9852404W	PB.2854.2,PB.2854.1
Chr2	Intron retention	9976000	9976222	+	Chr2:9972666-9978051W	PB.2858.2,PB.2858.1
Chr2	Alternative 3' splice site	10075041	10075103	+	Chr2:10074581-10081485W	PB.2860.4,PB.2860.1/PB.2860.3/PB.2860.5
Chr2	Alternative 3' splice site	10078465	10078503	+	Chr2:10074581-10081485W	PB.2860.5/PB.2860.6,PB.2860.3
Chr2	Intron retention	10078356	10078503	+	Chr2:10074581-10081485W	PB.2860.1/PB.2860.4,PB.2860.3
Chr2	Intron retention	10078356	10078465	+	Chr2:10074581-10081485W	PB.2860.1/PB.2860.4,PB.2860.5/PB.2860.6
Chr2	Alternative 5' splice site	10080767	10080769	+	Chr2:10074581-10081485W	PB.2860.1/PB.2860.3/PB.2860.4/PB.2860.6,PB.2860.5
Chr2	Intron retention	10377156	10377358	+	Chr2:10371075-10378201W	PB.2863.2,PB.2863.1
Chr2	Intron retention	11964854	11965476	+	Chr2:11961716-11967888W	PB.2887.2,PB.2887.3
Chr2	Intron retention	11965940	11966249	+	Chr2:11961716-11967888W	PB.2887.4,PB.2887.1/PB.2887.2/PB.2887.3
Chr2	Alternative 3' splice site	19060398	19060405	+	Chr2:19058888-19063141W	PB.2983.2,PB.2983.1
Chr2	Alternative 3' splice site	19383103	19383204	+	Chr2:19376499-19385906W	PB.2991.4,PB.2991.1/PB.2991.3
Chr2	Alternative 5' splice site	19383389	19383398	+	Chr2:19376499-19385906W	PB.2991.1/PB.2991.3,PB.2991.2
Chr2	Mutually exclusive exon	19383103	19383398	+	Chr2:19376499-19385906W	PB.2991.4,PB.2991.2
Chr2	Intron retention	19383574	19383735	+	Chr2:19376499-19385906W	PB.2991.3/PB.2991.4,PB.2991.1
Chr2	Intron retention	19383574	19383942	+	Chr2:19376499-19385906W	PB.2991.2,PB.2991.1
Chr2	Intron retention	19383871	19383942	+	Chr2:19376499-19385906W	PB.2991.2,PB.2991.3/PB.2991.4
Chr2	Alternative 3' splice site	19752051	19752056	+	Chr2:19750069-19755009W	PB.3001.2,PB.3001.1
Chr2	Intron retention	21088141	21088175	+	Chr2:21082642-21088264W	PB.3035.1,PB.3035.2
Chr2	Alternative 5' splice site	21320071	21320110	+	Chr2:21319944-21325141W	PB.3043.2,PB.3043.1
Chr2	Alternative 3' splice site	21324235	21324238	+	Chr2:21319944-21325141W	PB.3043.2,PB.3043.1
Chr2	Alternative 3' splice site	22335300	22335323	+	Chr2:22333258-22337626W	PB.3062.1/PB.3062.3,PB.3062.2
Chr2	Alternative 3' splice site	24268415	24268466	+	Chr2:24268110-24269799W	PB.3127.2,PB.3127.1
Chr2	Alternative 3' splice site	25772936	25772942	+	Chr2:25767225-25774440W	PB.3178.1,PB.3178.2
Chr2	Intron retention	25896083	25896370	+	Chr2:25895507-25899915W	PB.3180.4,PB.3180.2
Chr2	Intron retention	25895709	25896379	+	Chr2:25895507-25899915W	PB.3180.4,PB.3180.3
Chr2	Alternative 3' splice site	25898371	25898379	+	Chr2:25895507-25899915W	PB.3180.2/PB.3180.3/PB.3180.4,PB.3180.5
Chr2	Alternative 3' splice site	26393435	26393544	+	Chr2:26392957-26396526W	PB.3192.1,PB.3192.2
Chr2	Alternative 3' splice site	27698576	27698582	+	Chr2:27696394-27702032W	PB.3227.1,PB.3227.2
Chr2	Exon skipping	28215894	28216012	+	Chr2:28212186-28219033W	PB.3242.5,PB.3242.1/PB.3242.2/PB.3242.3/PB.3242.6
Chr2	Intron retention	28216012	28216133	+	Chr2:28212186-28219033W	PB.3242.4,PB.3242.1/PB.3242.2/PB.3242.3/PB.3242.6
Chr2	Alternative 3' splice site	28215894	28216133	+	Chr2:28212186-28219033W	PB.3242.4,PB.3242.5
Chr2	Alternative 3' splice site	28534607	28534611	+	Chr2:28532904-28536958W	PB.3253.1,PB.3253.2
Chr2	Intron retention	28770152	28770436	+	Chr2:28768767-28772097W	PB.3266.2,PB.3266.1
Chr2	Alternative 5' splice site	28804997	28805055	+	Chr2:28802906-28805748W	PB.3269.2,PB.3269.1/PB.3269.3
Chr2	Intron retention	28821075	28821099	+	Chr2:28820725-28826597W	PB.3271.4,PB.3271.2/PB.3271.3/PB.3271.5
Chr2	Intron retention	28822509	28822597	+	Chr2:28820725-28826597W	PB.3271.1/PB.3271.3,PB.3271.2/PB.3271.4/PB.3271.5
Chr2	Intron retention	28822917	28822992	+	Chr2:28820725-28826597W	PB.3271.2/PB.3271.3/PB.3271.4/PB.3271.5,PB.3271.1
Chr2	Alternative 5' splice site	28823213	28823221	+	Chr2:28820725-28826597W	PB.3271.1,PB.3271.2/PB.3271.3/PB.3271.4/PB.3271.5/PB.3271.6
Chr2	Intron retention	29279762	29279934	+	Chr2:29277607-29283861W	PB.3288.2,PB.3288.1
Chr2	Alternative 3' splice site	29596849	29596852	+	Chr2:29594623-29598898W	PB.3303.2,PB.3303.1
Chr2	Intron retention	29823787	29824066	+	Chr2:29821977-29825200W	PB.3315.1,PB.3315.2/PB.3315.3/PB.3315.4/PB.3315.5
Chr2	Alternative 3' splice site	30382052	30382060	+	Chr2:30381306-30383475W	PB.3345.2,PB.3345.3
Chr2	Intron retention	30428222	30428318	+	Chr2:30427619-30431740W	PB.3348.2,PB.3348.1
Chr2	Exon skipping	31295645	31296313	+	Chr2:31290666-31298889W	PB.3386.1,PB.3386.2/PB.3386.3
Chr2	Alternative 5' splice site	31909163	31909170	+	Chr2:31908596-31911675W	PB.3426.4,PB.3426.5
Chr2	Intron retention	31909356	31909553	+	Chr2:31908596-31911675W	PB.3426.4,PB.3426.3/PB.3426.5
Chr2	Alternative 3' splice site	31909553	31909561	+	Chr2:31908596-31911675W	PB.3426.8,PB.3426.6
Chr2	Intron retention	32829176	32829871	+	Chr2:32827841-32832767W	PB.3462.1,PB.3462.2/PB.3462.3/PB.3462.4
Chr2	Intron retention	32831626	32831817	+	Chr2:32827841-32832767W	PB.3462.2,PB.3462.1/PB.3462.3/PB.3462.4
Chr2	Alternative 3' splice site	32939450	32939458	+	Chr2:32934164-32945154W	PB.3466.2,PB.3466.1
Chr2	Intron retention	32959784	32960292	+	Chr2:32957393-32961407W	PB.3468.1,PB.3468.2
Chr2	Alternative 5' splice site	35036090	35036096	+	Chr2:35034861-35040474W	PB.3563.2,PB.3563.1
Chr2	Intron retention	35811159	35811405	+	Chr2:35807044-35812440W	PB.3619.2,PB.3619.1
Chr2	Intron retention	82509	82440	-	Chr2:78494-82880C	PB.2570.2,PB.2570.1/PB.2570.3/PB.2570.4
Chr2	Alternative 3' splice site	183903	183877	-	Chr2:183608-185268C	PB.2580.2,PB.2580.3
Chr2	Exon skipping	856707	856560	-	Chr2:853791-859876C	PB.2605.2,PB.2605.1
Chr2	Intron retention	1084255	1083904	-	Chr2:1080553-1084283C	PB.2619.2,PB.2619.1
Chr2	Alternative 5' splice site	2859342	2859324	-	Chr2:2850238-2861145C	PB.2688.1,PB.2688.2
Chr2	Intron retention	5470066	5469517	-	Chr2:5468648-5470464C	PB.2778.1,PB.2778.2
Chr2	Alternative 5' splice site	6511642	6511334	-	Chr2:6508868-6513833C	PB.2798.10/PB.2798.3/PB.2798.4/PB.2798.5/PB.2798.7/PB.2798.9,PB.2798.1
Chr2	Intron retention	6511334	6510383	-	Chr2:6508868-6513833C	PB.2798.2,PB.2798.1
Chr2	Intron retention	6511642	6510383	-	Chr2:6508868-6513833C	PB.2798.2,PB.2798.3
Chr2	Intron retention	6511642	6510383	-	Chr2:6508868-6513833C	PB.2798.11,PB.2798.10
Chr2	Intron retention	6511642	6510383	-	Chr2:6508868-6513833C	PB.2798.8,PB.2798.7
Chr2	Intron retention	7519175	7519150	-	Chr2:7516238-7519231C	PB.2817.1/PB.2817.2,PB.2817.3
Chr2	Alternative 5' splice site	8556600	8555799	-	Chr2:8553858-8558167C	PB.2833.2,PB.2833.4
Chr2	Alternative 3' splice site	8556101	8555628	-	Chr2:8553858-8558167C	PB.2833.3,PB.2833.2
Chr2	Intron retention	8555799	8555628	-	Chr2:8553858-8558167C	PB.2833.1,PB.2833.4
Chr2	Intron retention	8556600	8555628	-	Chr2:8553858-8558167C	PB.2833.1,PB.2833.2
Chr2	Intron retention	8556600	8556101	-	Chr2:8553858-8558167C	PB.2833.1,PB.2833.3
Chr2	Intron retention	9418646	9418558	-	Chr2:9416694-9418715C	PB.2848.1,PB.2848.3
Chr2	Intron retention	11740586	11740335	-	Chr2:11738753-11741733C	PB.2885.1,PB.2885.2
Chr2	Alternative 5' splice site	12506439	12506422	-	Chr2:12503798-12506887C	PB.2897.2,PB.2897.1
Chr2	Alternative 3' splice site	13226574	13226568	-	Chr2:13223119-13227349C	PB.2909.3,PB.2909.1
Chr2	Intron retention	13226685	13226574	-	Chr2:13223119-13227349C	PB.2909.2/PB.2909.4,PB.2909.3
Chr2	Intron retention	13226685	13226568	-	Chr2:13223119-13227349C	PB.2909.2/PB.2909.4,PB.2909.1
Chr2	Intron retention	13226473	13226365	-	Chr2:13223119-13227349C	PB.2909.6,PB.2909.1
Chr2	Intron retention	13226321	13226220	-	Chr2:13223119-13227349C	PB.2909.4,PB.2909.1/PB.2909.2/PB.2909.3
Chr2	Intron retention	13980520	13979783	-	Chr2:13977794-13987334C	PB.2919.1,PB.2919.2
Chr2	Exon skipping	15484810	15484677	-	Chr2:15482790-15485890C	PB.2935.2,PB.2935.1
Chr2	Intron retention	15485175	15483162	-	Chr2:15482790-15485890C	PB.2935.3,PB.2935.1
Chr2	Intron retention	15485175	15483162	-	Chr2:15482790-15485890C	PB.2935.3,PB.2935.2
Chr2	Exon skipping	17507065	17506938	-	Chr2:17494308-17507790C	PB.2955.2,PB.2955.1
Chr2	Alternative 5' splice site	20719217	20719209	-	Chr2:20717913-20721925C	PB.3018.1/PB.3018.2/PB.3018.4,PB.3018.3
Chr2	Alternative 3' splice site	21121383	21121372	-	Chr2:21115912-21122133C	PB.3038.2,PB.3038.1/PB.3038.3
Chr2	Alternative 5' splice site	23550706	23550685	-	Chr2:23549175-23554380C	PB.3103.1/PB.3103.4/PB.3103.6,PB.3103.3
Chr2	Intron retention	23550706	23550607	-	Chr2:23549175-23554380C	PB.3103.5,PB.3103.1/PB.3103.4/PB.3103.6
Chr2	Intron retention	23550685	23550607	-	Chr2:23549175-23554380C	PB.3103.5,PB.3103.3
Chr2	Alternative 3' splice site	23750104	23750098	-	Chr2:23749151-23753238C	PB.3109.2,PB.3109.1
Chr2	Intron retention	24724069	24724045	-	Chr2:24718246-24724116C	PB.3136.1,PB.3136.2
Chr2	Intron retention	24785312	24784082	-	Chr2:24783201-24786473C	PB.3142.1,PB.3142.2
Chr2	Intron retention	24977170	24977039	-	Chr2:24973403-24977287C	PB.3148.1/PB.3148.4/PB.3148.5/PB.3148.7/PB.3148.8,PB.3148.3
Chr2	Exon skipping	25513180	25513069	-	Chr2:25510864-25513649C	PB.3168.1,PB.3168.3
Chr2	Intron retention	28255929	28255670	-	Chr2:28252497-28256929C	PB.3244.2,PB.3244.1/PB.3244.3
Chr2	Intron retention	28254655	28254553	-	Chr2:28252497-28256929C	PB.3244.2,PB.3244.1/PB.3244.3
Chr2	Mutually exclusive exon	28943722	28943497	-	Chr2:28939797-28948354C	PB.3275.1,PB.3275.2
Chr2	Intron retention	29084112	29083655	-	Chr2:29081844-29086710C	PB.3282.2,PB.3282.1
Chr2	Intron retention	29741453	29741372	-	Chr2:29734962-29741711C	PB.3310.7,PB.3310.4
Chr2	Alternative 5' splice site	29740799	29740794	-	Chr2:29734962-29741711C	PB.3310.2/PB.3310.3/PB.3310.4,PB.3310.7
Chr2	Exon skipping	29739137	29739060	-	Chr2:29734962-29741711C	PB.3310.2/PB.3310.4/PB.3310.6,PB.3310.3/PB.3310.7
Chr2	Alternative 5' splice site	30463386	30463370	-	Chr2:30459390-30464140C	PB.3350.5,PB.3350.1/PB.3350.4
Chr2	Exon skipping	30463447	30463370	-	Chr2:30459390-30464140C	PB.3350.2/PB.3350.3,PB.3350.1/PB.3350.4
Chr2	Exon skipping	30463447	30463386	-	Chr2:30459390-30464140C	PB.3350.2/PB.3350.3,PB.3350.5
Chr2	Intron retention	30459803	30459712	-	Chr2:30459390-30464140C	PB.3350.3,PB.3350.4
Chr2	Alternative 5' splice site	30963384	30963372	-	Chr2:30958875-30965276C	PB.3369.2/PB.3369.3,PB.3369.1
Chr2	Intron retention	30963190	30963173	-	Chr2:30958875-30965276C	PB.3369.1/PB.3369.2,PB.3369.3
Chr2	Alternative 3' splice site	31013346	31013343	-	Chr2:31009088-31024573C	PB.3372.1/PB.3372.2,PB.3372.3
Chr2	Alternative 3' splice site	31437523	31437514	-	Chr2:31432599-31437994C	PB.3393.2,PB.3393.1
Chr2	Alternative 5' splice site	31920227	31920215	-	Chr2:31916127-31920570C	PB.3427.1,PB.3427.2
Chr2	Intron retention	32646921	32645669	-	Chr2:32644975-32648504C	PB.3457.2,PB.3457.1
Chr2	Alternative 3' splice site	32736435	32736416	-	Chr2:32730749-32740543C	PB.3461.1/PB.3461.3,PB.3461.2
Chr2	Intron retention	32836275	32836262	-	Chr2:32832939-32836414C	PB.3463.1,PB.3463.2
Chr2	Intron retention	33173387	33173217	-	Chr2:33170090-33175653C	PB.3477.3/PB.3477.5,PB.3477.4
Chr2	Intron retention	33173007	33172212	-	Chr2:33170090-33175653C	PB.3477.5,PB.3477.3/PB.3477.4
Chr2	Alternative 3' splice site	34433850	34433603	-	Chr2:34428636-34434256C	PB.3532.6,PB.3532.3
Chr2	Intron retention	35644393	35644294	-	Chr2:35642995-35648379C	PB.3607.2/PB.3607.5,PB.3607.1/PB.3607.3/PB.3607.4/PB.3607.6
Chr2	Intron retention	35684960	35684878	-	Chr2:35683507-35688516C	PB.3611.2,PB.3611.1/PB.3611.3
Chr2	Intron retention	35816197	35816125	-	Chr2:35812497-35818193C	PB.3620.2,PB.3620.1/PB.3620.3
Chr3	Intron retention	14233	14307	+	Chr3:13131-16560W	PB.3627.2,PB.3627.1
Chr3	Intron retention	633868	633947	+	Chr3:632630-636373W	PB.3659.3,PB.3659.1/PB.3659.2
Chr3	Intron retention	933766	934377	+	Chr3:932238-934709W	PB.3681.1,PB.3681.2
Chr3	Exon skipping	2056060	2056127	+	Chr3:2055441-2058975W	PB.3740.2/PB.3740.3,PB.3740.1
Chr3	Intron retention	2057339	2057937	+	Chr3:2055441-2058975W	PB.3740.3,PB.3740.1/PB.3740.2
Chr3	Alternative 3' splice site	3041048	3041090	+	Chr3:3039761-3045324W	PB.3783.2,PB.3783.1
Chr3	Intron retention	3649182	3649598	+	Chr3:3646944-3651598W	PB.3809.2,PB.3809.1
Chr3	Alternative 3' splice site	4095171	4095172	+	Chr3:4094564-4119844W	PB.3831.6,PB.3831.1
Chr3	Intron retention	4208223	4208315	+	Chr3:4203490-4210236W	PB.3834.1,PB.3834.2/PB.3834.3/PB.3834.4
Chr3	Alternative 3' splice site	4289016	4289067	+	Chr3:4287351-4291796W	PB.3840.1,PB.3840.2
Chr3	Intron retention	4592633	4592697	+	Chr3:4592489-4594804W	PB.3852.1,PB.3852.2
Chr3	Alternative 5' splice site	4816760	4816790	+	Chr3:4815545-4820245W	PB.3862.3,PB.3862.2
Chr3	Alternative 3' splice site	6042295	6042301	+	Chr3:6041155-6048682W	PB.3920.2,PB.3920.1
Chr3	Alternative 5' splice site	6582691	6582697	+	Chr3:6581180-6587875W	PB.3948.1/PB.3948.3,PB.3948.4
Chr3	Alternative 3' splice site	6756046	6756075	+	Chr3:6754275-6756839W	PB.3957.3,PB.3957.4
Chr3	Intron retention	6755233	6756075	+	Chr3:6754275-6756839W	PB.3957.10,PB.3957.4
Chr3	Intron retention	6755233	6756046	+	Chr3:6754275-6756839W	PB.3957.10,PB.3957.3
Chr3	Intron retention	7472303	7472864	+	Chr3:7469734-7475450W	PB.3988.2,PB.3988.1/PB.3988.3
Chr3	Intron retention	7480703	7481687	+	Chr3:7480379-7483331W	PB.3990.3/PB.3990.6,PB.3990.1
Chr3	Alternative 5' splice site	7599880	7599895	+	Chr3:7599692-7603062W	PB.3998.2,PB.3998.1
Chr3	Intron retention	8403225	8403317	+	Chr3:8398776-8406137W	PB.4031.1/PB.4031.3/PB.4031.4,PB.4031.2
Chr3	Intron retention	9436957	9437162	+	Chr3:9436560-9440589W	PB.4091.2,PB.4091.3/PB.4091.4
Chr3	Intron retention	9436902	9437224	+	Chr3:9436560-9440589W	PB.4091.2,PB.4091.5
Chr3	Intron retention	9439705	9439801	+	Chr3:9436560-9440589W	PB.4091.3,PB.4091.1/PB.4091.2/PB.4091.4/PB.4091.5/PB.4091.6/PB.4091.7
Chr3	Alternative 3' splice site	9446247	9446250	+	Chr3:9445430-9448700W	PB.4092.3,PB.4092.1
Chr3	Intron retention	9606312	9606648	+	Chr3:9605114-9608335W	PB.4099.2/PB.4099.3,PB.4099.1
Chr3	Intron retention	9843952	9845309	+	Chr3:9843328-9846746W	PB.4111.1/PB.4111.4,PB.4111.2/PB.4111.3
Chr3	Mutually exclusive exon	9987685	9987767	+	Chr3:9987194-9990421W	PB.4121.2,PB.4121.1
Chr3	Alternative 5' splice site	10150326	10150353	+	Chr3:10148165-10153111W	PB.4128.1/PB.4128.2,PB.4128.3
Chr3	Intron retention	11367644	11367746	+	Chr3:11367250-11368816W	PB.4183.3,PB.4183.2
Chr3	Alternative 3' splice site	12403930	12403950	+	Chr3:12401924-12408463W	PB.4222.1,PB.4222.2
Chr3	Intron retention	13283304	13283977	+	Chr3:13283226-13284513W	PB.4253.1,PB.4253.2
Chr3	Exon skipping	13784820	13784826	+	Chr3:13776974-13788688W	PB.4260.1/PB.4260.2/PB.4260.4,PB.4260.3
Chr3	Alternative 5' splice site	13786552	13786573	+	Chr3:13776974-13788688W	PB.4260.5,PB.4260.1/PB.4260.2/PB.4260.3/PB.4260.4
Chr3	Intron retention	13786573	13787047	+	Chr3:13776974-13788688W	PB.4260.7,PB.4260.1/PB.4260.2/PB.4260.3/PB.4260.4
Chr3	Intron retention	13786552	13787047	+	Chr3:13776974-13788688W	PB.4260.7,PB.4260.5
Chr3	Exon skipping	15468577	15468608	+	Chr3:15467831-15473836W	PB.4293.10/PB.4293.3,PB.4293.1/PB.4293.5/PB.4293.6/PB.4293.8/PB.4293.9
Chr3	Alternative 3' splice site	15470638	15470641	+	Chr3:15467831-15473836W	PB.4293.1/PB.4293.10/PB.4293.11/PB.4293.12/PB.4293.15/PB.4293.3/PB.4293.5/PB.4293.6/PB.4293.7/PB.4293.9,PB.4293.13/PB.4293.14/PB.4293.8
Chr3	Exon skipping	15471005	15471076	+	Chr3:15467831-15473836W	PB.4293.14/PB.4293.5/PB.4293.6,PB.4293.1/PB.4293.10/PB.4293.11/PB.4293.12/PB.4293.13/PB.4293.15/PB.4293.3/PB.4293.7/PB.4293.8/PB.4293.9
Chr3	Intron retention	15471646	15471740	+	Chr3:15467831-15473836W	PB.4293.10/PB.4293.11/PB.4293.12/PB.4293.13/PB.4293.14/PB.4293.15/PB.4293.3/PB.4293.5/PB.4293.6/PB.4293.7/PB.4293.8/PB.4293.9,PB.4293.1
Chr3	Intron retention	15472627	15473100	+	Chr3:15467831-15473836W	PB.4293.12/PB.4293.13/PB.4293.6,PB.4293.1/PB.4293.10/PB.4293.11/PB.4293.14/PB.4293.15/PB.4293.3/PB.4293.5/PB.4293.7/PB.4293.8/PB.4293.9
Chr3	Alternative 3' splice site	15503111	15503137	+	Chr3:15498791-15507731W	PB.4294.2,PB.4294.1
Chr3	Alternative 3' splice site	15651422	15651482	+	Chr3:15648904-15652097W	PB.4299.2,PB.4299.3
Chr3	Intron retention	15662476	15662559	+	Chr3:15661856-15665667W	PB.4300.1,PB.4300.2
Chr3	Intron retention	16284706	16284780	+	Chr3:16282777-16290424W	PB.4315.2,PB.4315.1
Chr3	Intron retention	16968932	16968978	+	Chr3:16965191-16970733W	PB.4328.2/PB.4328.3/PB.4328.4,PB.4328.5
Chr3	Intron retention	21393079	21393599	+	Chr3:21392894-21394765W	PB.4395.1,PB.4395.2
Chr3	Alternative 5' splice site	23086457	23086467	+	Chr3:23086311-23090272W	PB.4428.3,PB.4428.2
Chr3	Exon skipping	23928339	23928497	+	Chr3:23925602-23934166W	PB.4436.2,PB.4436.3
Chr3	Exon skipping	24451235	24451472	+	Chr3:24449541-24453934W	PB.4444.1,PB.4444.2/PB.4444.3
Chr3	Alternative 5' splice site	26449944	26449946	+	Chr3:26448886-26451465W	PB.4489.1,PB.4489.2
Chr3	Exon skipping	27120386	27120429	+	Chr3:27120129-27250954W	PB.4498.2,PB.4498.1
Chr3	Alternative 3' splice site	28183448	28183475	+	Chr3:28179968-28186109W	PB.4527.1,PB.4527.2/PB.4527.3/PB.4527.4
Chr3	Intron retention	28183860	28184378	+	Chr3:28179968-28186109W	PB.4527.4,PB.4527.1/PB.4527.2/PB.4527.3
Chr3	Alternative 3' splice site	28665413	28665427	+	Chr3:28663977-28667939W	PB.4540.2/PB.4540.4,PB.4540.5
Chr3	Intron retention	29527516	29527603	+	Chr3:29526118-29529163W	PB.4575.4,PB.4575.2/PB.4575.5/PB.4575.6
Chr3	Intron retention	30792411	30793044	+	Chr3:30791642-30796353W	PB.4611.2,PB.4611.1
Chr3	Intron retention	30825847	30826824	+	Chr3:30825183-30829241W	PB.4614.2,PB.4614.1
Chr3	Intron retention	30854525	30854736	+	Chr3:30851608-30857369W	PB.4616.5,PB.4616.1/PB.4616.2/PB.4616.3/PB.4616.4
Chr3	Alternative 5' splice site	31854400	31854407	+	Chr3:31853854-31857937W	PB.4673.2,PB.4673.1
Chr3	Intron retention	32146348	32146377	+	Chr3:32142161-32146666W	PB.4687.2,PB.4687.1
Chr3	Intron retention	32371994	32372109	+	Chr3:32371758-32374779W	PB.4698.1/PB.4698.2,PB.4698.3
Chr3	Alternative 3' splice site	34418600	34418624	+	Chr3:34412851-34419235W	PB.4806.1/PB.4806.3,PB.4806.2
Chr3	Intron retention	35468645	35468770	+	Chr3:35467630-35469841W	PB.4871.3,PB.4871.1/PB.4871.2
Chr3	Alternative 3' splice site	35591749	35591762	+	Chr3:35589782-35595964W	PB.4878.2/PB.4878.4,PB.4878.1/PB.4878.3/PB.4878.5
Chr3	Alternative 3' splice site	35594110	35594116	+	Chr3:35589782-35595964W	PB.4878.1/PB.4878.2/PB.4878.4/PB.4878.5,PB.4878.3
Chr3	Exon skipping	36095808	36095878	+	Chr3:36082327-36096494W	PB.4901.2,PB.4901.1
Chr3	Intron retention	36095727	36095959	+	Chr3:36082327-36096494W	PB.4901.3,PB.4901.1
Chr3	Intron retention	36095727	36095959	+	Chr3:36082327-36096494W	PB.4901.3,PB.4901.2
Chr3	Intron retention	36340796	36340882	+	Chr3:36340155-36346466W	PB.4917.2,PB.4917.1/PB.4917.3
Chr3	Intron retention	36382528	36382604	+	Chr3:36381703-36384488W	PB.4920.2,PB.4920.1
Chr3	Alternative 3' splice site	36395244	36395258	+	Chr3:36394773-36401700W	PB.4921.2,PB.4921.1
Chr3	Intron retention	132447	132214	-	Chr3:125326-132744C	PB.3636.3,PB.3636.1/PB.3636.2
Chr3	Intron retention	125792	125779	-	Chr3:125326-132744C	PB.3636.1/PB.3636.3,PB.3636.2
Chr3	Intron retention	472676	472302	-	Chr3:471456-476681C	PB.3650.2,PB.3650.1
Chr3	Intron retention	1788323	1788210	-	Chr3:1787652-1790778C	PB.3724.2,PB.3724.1
Chr3	Intron retention	1793135	1792836	-	Chr3:1791589-1796370C	PB.3725.2,PB.3725.1
Chr3	Exon skipping	2654802	2654795	-	Chr3:2651932-2661785C	PB.3770.25/PB.3770.5,PB.3770.18/PB.3770.24
Chr3	Intron retention	2654795	2654529	-	Chr3:2651932-2661785C	PB.3770.20/PB.3770.21/PB.3770.26/PB.3770.3/PB.3770.4/PB.3770.6/PB.3770.8,PB.3770.18/PB.3770.22/PB.3770.24/PB.3770.9
Chr3	Intron retention	2654522	2654502	-	Chr3:2651932-2661785C	PB.3770.17,PB.3770.18/PB.3770.22
Chr3	Intron retention	2654522	2654502	-	Chr3:2651932-2661785C	PB.3770.23,PB.3770.8
Chr3	Intron retention	2654795	2654529	-	Chr3:2651932-2661785C	PB.3770.23,PB.3770.17
Chr3	Intron retention	2654795	2654502	-	Chr3:2651932-2661785C	PB.3770.23,PB.3770.18/PB.3770.22
Chr3	Intron retention	2654522	2654502	-	Chr3:2651932-2661785C	PB.3770.14,PB.3770.21/PB.3770.26
Chr3	Alternative 5' splice site	2654446	2654405	-	Chr3:2651932-2661785C	PB.3770.18/PB.3770.22/PB.3770.8,PB.3770.21
Chr3	Alternative 5' splice site	2654446	2654420	-	Chr3:2651932-2661785C	PB.3770.23,PB.3770.15
Chr3	Alternative 5' splice site	2654420	2654368	-	Chr3:2651932-2661785C	PB.3770.15,PB.3770.19
Chr3	Alternative 5' splice site	2654420	2654405	-	Chr3:2651932-2661785C	PB.3770.15,PB.3770.14
Chr3	Alternative 5' splice site	2654446	2654368	-	Chr3:2651932-2661785C	PB.3770.23,PB.3770.19
Chr3	Alternative 5' splice site	2654446	2654405	-	Chr3:2651932-2661785C	PB.3770.23,PB.3770.14
Chr3	Alternative 5' splice site	2654405	2654368	-	Chr3:2651932-2661785C	PB.3770.14,PB.3770.19
Chr3	Alternative 3' splice site	2654271	2654256	-	Chr3:2651932-2661785C	PB.3770.14/PB.3770.21,PB.3770.26
Chr3	Intron retention	2654318	2654302	-	Chr3:2651932-2661785C	PB.3770.20/PB.3770.3/PB.3770.6,PB.3770.1/PB.3770.13/PB.3770.24/PB.3770.4/PB.3770.9
Chr3	Intron retention	2654446	2654271	-	Chr3:2651932-2661785C	PB.3770.20/PB.3770.3/PB.3770.6,PB.3770.18/PB.3770.22/PB.3770.8
Chr3	Intron retention	2654405	2654271	-	Chr3:2651932-2661785C	PB.3770.20/PB.3770.3/PB.3770.6,PB.3770.21
Chr3	Intron retention	2654405	2654256	-	Chr3:2651932-2661785C	PB.3770.20/PB.3770.3/PB.3770.6,PB.3770.26
Chr3	Intron retention	2654446	2654271	-	Chr3:2651932-2661785C	PB.3770.10/PB.3770.25/PB.3770.5,PB.3770.17
Chr3	Intron retention	2654522	2654302	-	Chr3:2651932-2661785C	PB.3770.10/PB.3770.25/PB.3770.5,PB.3770.24/PB.3770.9
Chr3	Intron retention	2654522	2654271	-	Chr3:2651932-2661785C	PB.3770.10/PB.3770.25/PB.3770.5,PB.3770.18/PB.3770.22
Chr3	Intron retention	2654420	2654271	-	Chr3:2651932-2661785C	PB.3770.11/PB.3770.12/PB.3770.2,PB.3770.15
Chr3	Intron retention	2654368	2654271	-	Chr3:2651932-2661785C	PB.3770.11/PB.3770.12/PB.3770.2,PB.3770.19
Chr3	Intron retention	2654446	2654271	-	Chr3:2651932-2661785C	PB.3770.11/PB.3770.12/PB.3770.2,PB.3770.23
Chr3	Intron retention	2654443	2654259	-	Chr3:2651932-2661785C	PB.3770.11/PB.3770.12/PB.3770.2,PB.3770.16
Chr3	Intron retention	2654405	2654271	-	Chr3:2651932-2661785C	PB.3770.11/PB.3770.12/PB.3770.2,PB.3770.14
Chr3	Intron retention	2654522	2654302	-	Chr3:2651932-2661785C	PB.3770.11/PB.3770.12/PB.3770.2,PB.3770.4
Chr3	Intron retention	2654522	2654271	-	Chr3:2651932-2661785C	PB.3770.11/PB.3770.12/PB.3770.2,PB.3770.8
Chr3	Intron retention	2654522	2654502	-	Chr3:2651932-2661785C	PB.3770.11/PB.3770.12/PB.3770.2,PB.3770.20/PB.3770.3/PB.3770.6
Chr3	Intron retention	2654522	2654271	-	Chr3:2651932-2661785C	PB.3770.11/PB.3770.12/PB.3770.2,PB.3770.21
Chr3	Intron retention	2654522	2654256	-	Chr3:2651932-2661785C	PB.3770.11/PB.3770.12/PB.3770.2,PB.3770.26
Chr3	Intron retention	2654795	2654529	-	Chr3:2651932-2661785C	PB.3770.11/PB.3770.12/PB.3770.2,PB.3770.10
Chr3	Intron retention	2654795	2654271	-	Chr3:2651932-2661785C	PB.3770.11/PB.3770.12/PB.3770.2,PB.3770.17
Chr3	Intron retention	2654795	2654302	-	Chr3:2651932-2661785C	PB.3770.11/PB.3770.12/PB.3770.2,PB.3770.24/PB.3770.9
Chr3	Intron retention	2654795	2654271	-	Chr3:2651932-2661785C	PB.3770.11/PB.3770.12/PB.3770.2,PB.3770.18/PB.3770.22
Chr3	Intron retention	3529424	3529070	-	Chr3:3525078-3531350C	PB.3804.4,PB.3804.1/PB.3804.3
Chr3	Intron retention	3529390	3529301	-	Chr3:3525078-3531350C	PB.3804.4,PB.3804.5
Chr3	Intron retention	4337506	4337492	-	Chr3:4336791-4338940C	PB.3842.1,PB.3842.2
Chr3	Intron retention	5764576	5764075	-	Chr3:5760848-5767435C	PB.3898.2,PB.3898.1
Chr3	Intron retention	6061311	6061292	-	Chr3:6052762-6061367C	PB.3921.4,PB.3921.1
Chr3	Alternative 5' splice site	6707668	6707664	-	Chr3:6706220-6710684C	PB.3955.2,PB.3955.1/PB.3955.4
Chr3	Intron retention	6707664	6707593	-	Chr3:6706220-6710684C	PB.3955.3,PB.3955.1
Chr3	Intron retention	6707668	6707593	-	Chr3:6706220-6710684C	PB.3955.3,PB.3955.2
Chr3	Alternative 5' splice site	6706976	6706964	-	Chr3:6706220-6710684C	PB.3955.4,PB.3955.1/PB.3955.2
Chr3	Intron retention	6706639	6706395	-	Chr3:6706220-6710684C	PB.3955.2,PB.3955.3/PB.3955.4
Chr3	Exon skipping	7368688	7368346	-	Chr3:7358078-7369640C	PB.3983.1,PB.3983.2
Chr3	Alternative 3' splice site	8051665	8051659	-	Chr3:8047372-8052515C	PB.4018.1/PB.4018.3,PB.4018.2/PB.4018.4
Chr3	Alternative 5' splice site	8048802	8048741	-	Chr3:8047372-8052515C	PB.4018.2/PB.4018.3/PB.4018.4,PB.4018.1
Chr3	Intron retention	8048303	8048018	-	Chr3:8047372-8052515C	PB.4018.3/PB.4018.4,PB.4018.1/PB.4018.2
Chr3	Intron retention	8069574	8068973	-	Chr3:8067539-8071860C	PB.4019.1,PB.4019.2
Chr3	Intron retention	8221366	8221121	-	Chr3:8218890-8224127C	PB.4027.2,PB.4027.1
Chr3	Exon skipping	8768874	8768777	-	Chr3:8767534-8770548C	PB.4052.7/PB.4052.9,PB.4052.3/PB.4052.8
Chr3	Intron retention	8768777	8768659	-	Chr3:8767534-8770548C	PB.4052.1/PB.4052.13/PB.4052.6,PB.4052.3/PB.4052.8
Chr3	Alternative 3' splice site	8768874	8768659	-	Chr3:8767534-8770548C	PB.4052.1/PB.4052.13/PB.4052.6,PB.4052.7/PB.4052.9
Chr3	Intron retention	8768982	8768659	-	Chr3:8767534-8770548C	PB.4052.10/PB.4052.12/PB.4052.2,PB.4052.7/PB.4052.9
Chr3	Intron retention	8768982	8768874	-	Chr3:8767534-8770548C	PB.4052.10/PB.4052.12/PB.4052.2,PB.4052.1/PB.4052.13/PB.4052.6
Chr3	Intron retention	8768982	8768659	-	Chr3:8767534-8770548C	PB.4052.10/PB.4052.12/PB.4052.2,PB.4052.3/PB.4052.8
Chr3	Intron retention	8769203	8769131	-	Chr3:8767534-8770548C	PB.4052.5,PB.4052.10/PB.4052.12/PB.4052.2
Chr3	Intron retention	8769203	8768659	-	Chr3:8767534-8770548C	PB.4052.5,PB.4052.7/PB.4052.9
Chr3	Intron retention	8769203	8768874	-	Chr3:8767534-8770548C	PB.4052.5,PB.4052.1/PB.4052.13/PB.4052.6
Chr3	Intron retention	8769203	8768659	-	Chr3:8767534-8770548C	PB.4052.5,PB.4052.3/PB.4052.8
Chr3	Intron retention	8769578	8769314	-	Chr3:8767534-8770548C	PB.4052.4,PB.4052.5
Chr3	Intron retention	8769578	8769131	-	Chr3:8767534-8770548C	PB.4052.4,PB.4052.10/PB.4052.12/PB.4052.2
Chr3	Intron retention	8769578	8768659	-	Chr3:8767534-8770548C	PB.4052.4,PB.4052.7/PB.4052.9
Chr3	Intron retention	8769578	8768874	-	Chr3:8767534-8770548C	PB.4052.4,PB.4052.1/PB.4052.13/PB.4052.6
Chr3	Intron retention	8769578	8768659	-	Chr3:8767534-8770548C	PB.4052.4,PB.4052.3/PB.4052.8
Chr3	Intron retention	8770458	8769131	-	Chr3:8767534-8770548C	PB.4052.11,PB.4052.10
Chr3	Intron retention	8770458	8768659	-	Chr3:8767534-8770548C	PB.4052.11,PB.4052.9
Chr3	Alternative 3' splice site	8768472	8768463	-	Chr3:8767534-8770548C	PB.4052.9,PB.4052.8
Chr3	Intron retention	8910605	8910500	-	Chr3:8909178-8912947C	PB.4068.2,PB.4068.1/PB.4068.3/PB.4068.4
Chr3	Alternative 3' splice site	9033393	9033338	-	Chr3:9028842-9035333C	PB.4074.1,PB.4074.2
Chr3	Intron retention	9169273	9169189	-	Chr3:9167708-9170337C	PB.4080.2,PB.4080.1/PB.4080.4
Chr3	Intron retention	9639274	9639169	-	Chr3:9635832-9641189C	PB.4101.3,PB.4101.1/PB.4101.2
Chr3	Intron retention	9761525	9761443	-	Chr3:9759726-9768668C	PB.4109.2,PB.4109.1/PB.4109.3
Chr3	Intron retention	9855100	9854229	-	Chr3:9847732-9868891C	PB.4113.5,PB.4113.4
Chr3	Intron retention	9848617	9848086	-	Chr3:9847732-9868891C	PB.4113.2,PB.4113.3
Chr3	Intron retention	10320770	10320747	-	Chr3:10320275-10324794C	PB.4137.2,PB.4137.1
Chr3	Intron retention	10572581	10572436	-	Chr3:10571790-10573232C	PB.4152.2,PB.4152.1
Chr3	Intron retention	10624101	10624012	-	Chr3:10621697-10625365C	PB.4156.1,PB.4156.2
Chr3	Alternative 3' splice site	11245856	11245853	-	Chr3:11242295-11247447C	PB.4180.3,PB.4180.2
Chr3	Alternative 5' splice site	11906165	11906162	-	Chr3:11902847-11907353C	PB.4199.3,PB.4199.2
Chr3	Alternative 5' splice site	12155843	12155822	-	Chr3:12151159-12157599C	PB.4207.2,PB.4207.1
Chr3	Intron retention	13067350	13066891	-	Chr3:13063204-13070889C	PB.4244.2,PB.4244.1
Chr3	Intron retention	16303515	16303427	-	Chr3:16301307-16307624C	PB.4317.5,PB.4317.1/PB.4317.7/PB.4317.8
Chr3	Intron retention	16303061	16302956	-	Chr3:16301307-16307624C	PB.4317.5,PB.4317.1/PB.4317.7
Chr3	Intron retention	17520636	17520088	-	Chr3:17515060-17521937C	PB.4340.2,PB.4340.1/PB.4340.3
Chr3	Alternative 3' splice site	17519270	17519267	-	Chr3:17515060-17521937C	PB.4340.3,PB.4340.1/PB.4340.2
Chr3	Intron retention	19201388	19201289	-	Chr3:19197583-19204161C	PB.4363.2,PB.4363.1
Chr3	Alternative 5' splice site	20185455	20185385	-	Chr3:20181719-20188057C	PB.4368.2,PB.4368.1
Chr3	Exon skipping	20871976	20871792	-	Chr3:20868306-20875734C	PB.4379.1/PB.4379.2/PB.4379.4/PB.4379.5,PB.4379.3
Chr3	Intron retention	22185872	22185860	-	Chr3:22184208-22201208C	PB.4411.1,PB.4411.2
Chr3	Alternative 5' splice site	27705902	27705850	-	Chr3:27705395-27710777C	PB.4512.3,PB.4512.1/PB.4512.2
Chr3	Intron retention	28310212	28309897	-	Chr3:28308342-28312168C	PB.4533.2,PB.4533.1
Chr3	Alternative 3' splice site	28309454	28309451	-	Chr3:28308342-28312168C	PB.4533.1,PB.4533.2
Chr3	Intron retention	29142499	29142401	-	Chr3:29137662-29145554C	PB.4559.2,PB.4559.1
Chr3	Exon skipping	29334250	29334176	-	Chr3:29329155-29336543C	PB.4570.1,PB.4570.2
Chr3	Intron retention	30732430	30732362	-	Chr3:30726968-30733478C	PB.4608.2,PB.4608.1
Chr3	Alternative 3' splice site	32786845	32786820	-	Chr3:32783448-32787234C	PB.4722.1,PB.4722.2
Chr3	Alternative 5' splice site	32915031	32914829	-	Chr3:32911225-32915146C	PB.4725.4,PB.4725.3
Chr3	Intron retention	32915031	32913989	-	Chr3:32911225-32915146C	PB.4725.1,PB.4725.2
Chr3	Intron retention	32913749	32912891	-	Chr3:32911225-32915146C	PB.4725.4,PB.4725.2/PB.4725.3
Chr3	Intron retention	34171483	34171326	-	Chr3:34167774-34173337C	PB.4791.3,PB.4791.1/PB.4791.2
Chr3	Alternative 5' splice site	35263951	35263947	-	Chr3:35259427-35264560C	PB.4862.2,PB.4862.3
Chr3	Alternative 3' splice site	35451934	35451929	-	Chr3:35446387-35452470C	PB.4869.10,PB.4869.1/PB.4869.11/PB.4869.2/PB.4869.3/PB.4869.4/PB.4869.5/PB.4869.6/PB.4869.7/PB.4869.8/PB.4869.9
Chr3	Alternative 5' splice site	35447820	35447787	-	Chr3:35446387-35452470C	PB.4869.10/PB.4869.9,PB.4869.8
Chr3	Intron retention	35447820	35447687	-	Chr3:35446387-35452470C	PB.4869.4/PB.4869.6,PB.4869.10
Chr3	Alternative 5' splice site	35447600	35447574	-	Chr3:35446387-35452470C	PB.4869.11/PB.4869.2,PB.4869.4/PB.4869.6
Chr3	Intron retention	35447600	35447503	-	Chr3:35446387-35452470C	PB.4869.7,PB.4869.11
Chr3	Intron retention	35447574	35447503	-	Chr3:35446387-35452470C	PB.4869.7,PB.4869.4
Chr3	Exon skipping	35447885	35447398	-	Chr3:35446387-35452470C	PB.4869.3,PB.4869.7
Chr3	Exon skipping	35447885	35447398	-	Chr3:35446387-35452470C	PB.4869.3,PB.4869.11
Chr3	Exon skipping	35447885	35447398	-	Chr3:35446387-35452470C	PB.4869.3,PB.4869.4
Chr3	Intron retention	35447398	35447224	-	Chr3:35446387-35452470C	PB.4869.10/PB.4869.2/PB.4869.6,PB.4869.11/PB.4869.4
Chr3	Intron retention	35447574	35447503	-	Chr3:35446387-35452470C	PB.4869.8/PB.4869.9,PB.4869.10
Chr3	Intron retention	35447398	35447224	-	Chr3:35446387-35452470C	PB.4869.5,PB.4869.7
Chr3	Intron retention	35447600	35447503	-	Chr3:35446387-35452470C	PB.4869.5,PB.4869.2
Chr3	Intron retention	35447574	35447503	-	Chr3:35446387-35452470C	PB.4869.5,PB.4869.6
Chr3	Intron retention	35447600	35447224	-	Chr3:35446387-35452470C	PB.4869.5,PB.4869.11
Chr3	Intron retention	35447574	35447224	-	Chr3:35446387-35452470C	PB.4869.5,PB.4869.4
Chr3	Intron retention	35447820	35447687	-	Chr3:35446387-35452470C	PB.4869.5,PB.4869.9
Chr3	Intron retention	35447787	35447687	-	Chr3:35446387-35452470C	PB.4869.5,PB.4869.8
Chr3	Intron retention	35447820	35447503	-	Chr3:35446387-35452470C	PB.4869.5,PB.4869.10
Chr3	Alternative 3' splice site	35447885	35447224	-	Chr3:35446387-35452470C	PB.4869.5,PB.4869.3
Chr3	Intron retention	35448110	35447224	-	Chr3:35446387-35452470C	PB.4869.1,PB.4869.3
Chr3	Intron retention	35448110	35447224	-	Chr3:35446387-35452470C	PB.4869.1,PB.4869.7
Chr3	Intron retention	35448110	35447885	-	Chr3:35446387-35452470C	PB.4869.1,PB.4869.5
Chr3	Intron retention	35448110	35447503	-	Chr3:35446387-35452470C	PB.4869.1,PB.4869.2
Chr3	Intron retention	35448110	35447503	-	Chr3:35446387-35452470C	PB.4869.1,PB.4869.6
Chr3	Intron retention	35448110	35447224	-	Chr3:35446387-35452470C	PB.4869.1,PB.4869.11
Chr3	Intron retention	35448110	35447224	-	Chr3:35446387-35452470C	PB.4869.1,PB.4869.4
Chr3	Intron retention	35448110	35447687	-	Chr3:35446387-35452470C	PB.4869.1,PB.4869.9
Chr3	Intron retention	35448110	35447687	-	Chr3:35446387-35452470C	PB.4869.1,PB.4869.8
Chr3	Intron retention	35448110	35447503	-	Chr3:35446387-35452470C	PB.4869.1,PB.4869.10
Chr3	Alternative 3' splice site	36003789	36003774	-	Chr3:36001829-36007582C	PB.4899.1/PB.4899.3,PB.4899.2
Chr3	Intron retention	36182269	36182120	-	Chr3:36180599-36183072C	PB.4908.2,PB.4908.1
Chr4	Alternative 5' splice site	11744722	11744733	+	Chr4:11743947-11746926W	PB.5021.2,PB.5021.1
Chr4	Alternative 5' splice site	14713253	14713267	+	Chr4:14711389-14716710W	PB.5037.4,PB.5037.1/PB.5037.2/PB.5037.3/PB.5037.5/PB.5037.6
Chr4	Alternative 3' splice site	14714227	14714248	+	Chr4:14711389-14716710W	PB.5037.7,PB.5037.1/PB.5037.2/PB.5037.3/PB.5037.4/PB.5037.5/PB.5037.6
Chr4	Alternative 3' splice site	14714532	14714545	+	Chr4:14711389-14716710W	PB.5037.5,PB.5037.1/PB.5037.3/PB.5037.4/PB.5037.6/PB.5037.7
Chr4	Intron retention	14715185	14715456	+	Chr4:14711389-14716710W	PB.5037.4/PB.5037.7,PB.5037.1/PB.5037.2/PB.5037.5
Chr4	Intron retention	14715057	14715456	+	Chr4:14711389-14716710W	PB.5037.3/PB.5037.6,PB.5037.1/PB.5037.2/PB.5037.5
Chr4	Intron retention	14715057	14715158	+	Chr4:14711389-14716710W	PB.5037.3/PB.5037.6,PB.5037.4/PB.5037.7
Chr4	Intron retention	14715712	14715833	+	Chr4:14711389-14716710W	PB.5037.2/PB.5037.3/PB.5037.5,PB.5037.1/PB.5037.4/PB.5037.6/PB.5037.7
Chr4	Alternative 5' splice site	20251165	20251169	+	Chr4:20250080-20255825W	PB.5107.1,PB.5107.2
Chr4	Alternative 5' splice site	20251353	20251376	+	Chr4:20250080-20255825W	PB.5107.2,PB.5107.1
Chr4	Alternative 3' splice site	22018894	22018898	+	Chr4:22017906-22024123W	PB.5154.2,PB.5154.1
Chr4	Intron retention	22019717	22019804	+	Chr4:22017906-22024123W	PB.5154.1,PB.5154.2
Chr4	Intron retention	22151716	22152428	+	Chr4:22149767-22155300W	PB.5159.4,PB.5159.1/PB.5159.2
Chr4	Exon skipping	23104520	23104606	+	Chr4:23104017-23107949W	PB.5195.1,PB.5195.2
Chr4	Intron retention	23104251	23104814	+	Chr4:23104017-23107949W	PB.5195.3/PB.5195.5,PB.5195.4
Chr4	Intron retention	23318539	23318556	+	Chr4:23315218-23318843W	PB.5207.2,PB.5207.1
Chr4	Alternative 5' splice site	24265398	24265402	+	Chr4:24261429-24267729W	PB.5238.2,PB.5238.1
Chr4	Alternative 3' splice site	24612931	24612938	+	Chr4:24611412-24615163W	PB.5252.2,PB.5252.1
Chr4	Exon skipping	24915365	24915447	+	Chr4:24915052-24918144W	PB.5264.1,PB.5264.2
Chr4	Alternative 3' splice site	25048845	25048854	+	Chr4:25048435-25054432W	PB.5272.1/PB.5272.3,PB.5272.2
Chr4	Intron retention	25168982	25169832	+	Chr4:25165882-25170728W	PB.5280.2,PB.5280.1
Chr4	Intron retention	26617925	26618043	+	Chr4:26617453-26619100W	PB.5341.2,PB.5341.3
Chr4	Alternative 3' splice site	26698514	26698519	+	Chr4:26695717-26700515W	PB.5346.1,PB.5346.2
Chr4	Alternative 3' splice site	27203696	27203706	+	Chr4:27201552-27204753W	PB.5364.1,PB.5364.2
Chr4	Alternative 3' splice site	27984835	27985164	+	Chr4:27984124-27990663W	PB.5386.3,PB.5386.1/PB.5386.2/PB.5386.4
Chr4	Intron retention	27985778	27986069	+	Chr4:27984124-27990663W	PB.5386.4,PB.5386.1/PB.5386.2/PB.5386.3
Chr4	Alternative 3' splice site	28564689	28564695	+	Chr4:28563909-28567829W	PB.5408.3,PB.5408.2
Chr4	Alternative 3' splice site	28862897	28862904	+	Chr4:28862575-28868987W	PB.5415.1,PB.5415.2
Chr4	Alternative 3' splice site	28864913	28864919	+	Chr4:28862575-28868987W	PB.5415.1,PB.5415.2
Chr4	Intron retention	29089559	29090204	+	Chr4:29089515-29092954W	PB.5428.1,PB.5428.2
Chr4	Intron retention	30268229	30268278	+	Chr4:30267833-30270697W	PB.5474.1,PB.5474.2
Chr4	Intron retention	31547300	31547311	+	Chr4:31544128-31551226W	PB.5535.2,PB.5535.1
Chr4	Intron retention	33647001	33648122	+	Chr4:33645105-33649293W	PB.5622.3,PB.5622.2
Chr4	Intron retention	33844408	33844460	+	Chr4:33840009-33845947W	PB.5634.1/PB.5634.3,PB.5634.2
Chr4	Alternative 3' splice site	8087454	8087444	-	Chr4:8083822-8089239C	PB.4982.2,PB.4982.3
Chr4	Mutually exclusive exon	8221190	8221100	-	Chr4:8216583-8233296C	PB.4983.2,PB.4983.1
Chr4	Intron retention	9077342	9077245	-	Chr4:9075169-9077875C	PB.4987.3,PB.4987.1/PB.4987.2/PB.4987.4
Chr4	Alternative 3' splice site	20129064	20128312	-	Chr4:20125052-20131004C	PB.5102.3,PB.5102.1
Chr4	Intron retention	20129165	20128312	-	Chr4:20125052-20131004C	PB.5102.2,PB.5102.1
Chr4	Intron retention	20129165	20129064	-	Chr4:20125052-20131004C	PB.5102.2,PB.5102.3
Chr4	Intron retention	20230799	20229437	-	Chr4:20228927-20231166C	PB.5105.2,PB.5105.4
Chr4	Intron retention	21593268	21593143	-	Chr4:21591731-21595341C	PB.5142.2,PB.5142.1
Chr4	Intron retention	21889593	21889327	-	Chr4:21887000-21892999C	PB.5149.2,PB.5149.1
Chr4	Alternative 5' splice site	21900503	21900485	-	Chr4:21897085-21904500C	PB.5150.1,PB.5150.2
Chr4	Intron retention	22357517	22356486	-	Chr4:22355315-22357929C	PB.5169.2,PB.5169.1/PB.5169.3
Chr4	Intron retention	24181668	24181503	-	Chr4:24180720-24187293C	PB.5234.3,PB.5234.1/PB.5234.2
Chr4	Alternative 5' splice site	24569863	24569358	-	Chr4:24567203-24571582C	PB.5249.1,PB.5249.3
Chr4	Alternative 5' splice site	25134297	25134195	-	Chr4:25126752-25134362C	PB.5276.1,PB.5276.2
Chr4	Intron retention	25200923	25200854	-	Chr4:25194791-25201223C	PB.5282.1,PB.5282.2
Chr4	Intron retention	25576580	25576504	-	Chr4:25573672-25579633C	PB.5299.1/PB.5299.2,PB.5299.3/PB.5299.4
Chr4	Alternative 3' splice site	26714501	26714495	-	Chr4:26712600-26715673C	PB.5348.1,PB.5348.2
Chr4	Intron retention	29818113	29817900	-	Chr4:29814039-29818148C	PB.5459.1,PB.5459.2
Chr4	Alternative 5' splice site	30625265	30625252	-	Chr4:30621169-30628349C	PB.5491.3,PB.5491.2
Chr4	Intron retention	30623172	30622957	-	Chr4:30621169-30628349C	PB.5491.2,PB.5491.3
Chr4	Alternative 3' splice site	30695588	30695534	-	Chr4:30690637-30696676C	PB.5494.1,PB.5494.2
Chr4	Alternative 3' splice site	31672436	31672427	-	Chr4:31669218-31674595C	PB.5538.4,PB.5538.3
Chr4	Intron retention	31673726	31672427	-	Chr4:31669218-31674595C	PB.5538.6,PB.5538.3
Chr4	Exon skipping	31672427	31672213	-	Chr4:31669218-31674595C	PB.5538.1/PB.5538.2/PB.5538.5,PB.5538.3
Chr4	Exon skipping	31672436	31672213	-	Chr4:31669218-31674595C	PB.5538.1/PB.5538.2/PB.5538.5,PB.5538.4
Chr4	Alternative 5' splice site	31673726	31672213	-	Chr4:31669218-31674595C	PB.5538.1/PB.5538.2/PB.5538.5,PB.5538.6
Chr4	Intron retention	31671102	31671014	-	Chr4:31669218-31674595C	PB.5538.5,PB.5538.1/PB.5538.2/PB.5538.3/PB.5538.4/PB.5538.6
Chr4	Alternative 3' splice site	31980857	31980817	-	Chr4:31977234-31981163C	PB.5552.1,PB.5552.2
Chr4	Intron retention	32005457	32004895	-	Chr4:32002766-32007296C	PB.5555.2,PB.5555.1
Chr4	Alternative 3' splice site	32737126	32737123	-	Chr4:32735768-32739852C	PB.5587.1,PB.5587.2/PB.5587.3
Chr4	Intron retention	33737448	33736718	-	Chr4:33735165-33739397C	PB.5627.1,PB.5627.2/PB.5627.3
Chr4	Alternative 5' splice site	34285333	34285321	-	Chr4:34278478-34285725C	PB.5657.2/PB.5657.6,PB.5657.5
Chr4	Intron retention	34315551	34315442	-	Chr4:34314253-34320152C	PB.5658.2,PB.5658.1
Chr4	Alternative 3' splice site	34630407	34630391	-	Chr4:34626363-34631341C	PB.5670.2,PB.5670.1
Chr4	Intron retention	34819417	34819330	-	Chr4:34816662-34820098C	PB.5681.1,PB.5681.2
Chr4	Intron retention	35123313	35122255	-	Chr4:35120688-35124119C	PB.5698.2,PB.5698.1/PB.5698.3
Chr5	Intron retention	94180	94906	+	Chr5:91728-95720W	PB.5724.2,PB.5724.1
Chr5	Intron retention	472988	473298	+	Chr5:471414-476241W	PB.5753.1,PB.5753.2
Chr5	Alternative 5' splice site	1436196	1436202	+	Chr5:1426978-1438476W	PB.5791.3,PB.5791.2
Chr5	Intron retention	2099557	2099655	+	Chr5:2096144-2100413W	PB.5812.2,PB.5812.1
Chr5	Alternative 3' splice site	2514523	2514533	+	Chr5:2511638-2518069W	PB.5822.2,PB.5822.1/PB.5822.3
Chr5	Alternative 5' splice site	2569382	2569406	+	Chr5:2567072-2573117W	PB.5826.2,PB.5826.1
Chr5	Alternative 3' splice site	3690550	3690554	+	Chr5:3689948-3697630W	PB.5868.3,PB.5868.2
Chr5	Alternative 3' splice site	5438251	5438257	+	Chr5:5437051-5444959W	PB.5907.1,PB.5907.2/PB.5907.3
Chr5	Alternative 3' splice site	5439078	5439095	+	Chr5:5437051-5444959W	PB.5907.2,PB.5907.1/PB.5907.3
Chr5	Intron retention	6827052	6827111	+	Chr5:6824568-6827293W	PB.5930.1,PB.5930.2
Chr5	Intron retention	13531087	13531182	+	Chr5:13529544-13534340W	PB.5988.2,PB.5988.1
Chr5	Exon skipping	13927136	13927211	+	Chr5:13919863-13929163W	PB.5995.5,PB.5995.2/PB.5995.3/PB.5995.4
Chr5	Intron retention	13926399	13927458	+	Chr5:13919863-13929163W	PB.5995.1,PB.5995.2/PB.5995.3/PB.5995.4
Chr5	Intron retention	13926399	13927458	+	Chr5:13919863-13929163W	PB.5995.1,PB.5995.5
Chr5	Alternative 5' splice site	14688423	14688447	+	Chr5:14688266-14701323W	PB.6002.2,PB.6002.1
Chr5	Alternative 3' splice site	16971284	16971289	+	Chr5:16966074-16972039W	PB.6039.1,PB.6039.2
Chr5	Intron retention	17015182	17015644	+	Chr5:17014645-17018364W	PB.6041.2,PB.6041.1
Chr5	Alternative 3' splice site	17211549	17211832	+	Chr5:17209564-17215951W	PB.6042.4,PB.6042.2
Chr5	Intron retention	17211471	17211832	+	Chr5:17209564-17215951W	PB.6042.1/PB.6042.3,PB.6042.2
Chr5	Intron retention	17211471	17211549	+	Chr5:17209564-17215951W	PB.6042.1/PB.6042.3,PB.6042.4
Chr5	Alternative 3' splice site	17213611	17213619	+	Chr5:17209564-17215951W	PB.6042.1/PB.6042.2/PB.6042.4,PB.6042.3
Chr5	Intron retention	17294791	17294907	+	Chr5:17289199-17296339W	PB.6043.1,PB.6043.2
Chr5	Intron retention	17812707	17812796	+	Chr5:17812065-17816257W	PB.6050.4,PB.6050.5
Chr5	Alternative 5' splice site	20204206	20204274	+	Chr5:20204130-20207490W	PB.6122.1/PB.6122.3/PB.6122.4,PB.6122.2
Chr5	Intron retention	21122823	21123142	+	Chr5:21120832-21126804W	PB.6150.2,PB.6150.1
Chr5	Intron retention	21752591	21752717	+	Chr5:21750920-21754157W	PB.6174.1,PB.6174.2
Chr5	Intron retention	22933241	22934745	+	Chr5:22932724-22935780W	PB.6221.4,PB.6221.1/PB.6221.3
Chr5	Alternative 5' splice site	25459135	25459140	+	Chr5:25458637-25462060W	PB.6289.1,PB.6289.2
Chr5	Alternative 3' splice site	25459434	25459439	+	Chr5:25458637-25462060W	PB.6289.2,PB.6289.1
Chr5	Intron retention	25460714	25461329	+	Chr5:25458637-25462060W	PB.6289.2,PB.6289.1
Chr5	Alternative 3' splice site	25576097	25576106	+	Chr5:25575661-25579620W	PB.6294.1,PB.6294.2
Chr5	Intron retention	26852809	26853266	+	Chr5:26849855-26857018W	PB.6337.3,PB.6337.1
Chr5	Intron retention	26852843	26852869	+	Chr5:26849855-26857018W	PB.6337.3,PB.6337.2
Chr5	Alternative 3' splice site	27043568	27043585	+	Chr5:27043365-27048562W	PB.6351.2,PB.6351.1
Chr5	Exon skipping	27543221	27543765	+	Chr5:27542124-27545922W	PB.6366.2,PB.6366.1/PB.6366.3/PB.6366.4
Chr5	Alternative 5' splice site	27544440	27544973	+	Chr5:27542124-27545922W	PB.6366.1,PB.6366.2/PB.6366.4
Chr5	Intron retention	27544440	27545233	+	Chr5:27542124-27545922W	PB.6366.3,PB.6366.1
Chr5	Intron retention	27544973	27545233	+	Chr5:27542124-27545922W	PB.6366.3,PB.6366.2/PB.6366.4
Chr5	Intron retention	27716521	27716757	+	Chr5:27712359-27717712W	PB.6376.2,PB.6376.1
Chr5	Alternative 5' splice site	27778934	27779079	+	Chr5:27778787-27784819W	PB.6382.3,PB.6382.4
Chr5	Exon skipping	27860873	27860898	+	Chr5:27860564-27865063W	PB.6385.1/PB.6385.3,PB.6385.2
Chr5	Intron retention	27861245	27861363	+	Chr5:27860564-27865063W	PB.6385.1/PB.6385.2,PB.6385.3
Chr5	Alternative 3' splice site	28335591	28335594	+	Chr5:28334746-28339605W	PB.6414.2,PB.6414.1
Chr5	Alternative 3' splice site	28945420	28945426	+	Chr5:28940346-28948383W	PB.6430.1,PB.6430.2
Chr5	Alternative 3' splice site	102002	101993	-	Chr5:101412-104113C	PB.5726.2,PB.5726.1
Chr5	Alternative 3' splice site	356634	356579	-	Chr5:354120-358086C	PB.5746.3,PB.5746.2
Chr5	Intron retention	357836	356579	-	Chr5:354120-358086C	PB.5746.4,PB.5746.2
Chr5	Exon skipping	356579	356487	-	Chr5:354120-358086C	PB.5746.1,PB.5746.2
Chr5	Exon skipping	356634	356487	-	Chr5:354120-358086C	PB.5746.1,PB.5746.3
Chr5	Alternative 3' splice site	356136	356125	-	Chr5:354120-358086C	PB.5746.5,PB.5746.2/PB.5746.3/PB.5746.4
Chr5	Intron retention	720889	719926	-	Chr5:719134-721868C	PB.5764.2,PB.5764.1/PB.5764.5
Chr5	Intron retention	1048150	1047458	-	Chr5:1045943-1049369C	PB.5780.3,PB.5780.2/PB.5780.4
Chr5	Intron retention	2781094	2780966	-	Chr5:2777326-2783546C	PB.5832.2,PB.5832.1
Chr5	Alternative 5' splice site	3787977	3787948	-	Chr5:3785154-3801066C	PB.5874.2,PB.5874.1
Chr5	Intron retention	4119963	4119618	-	Chr5:4117768-4121359C	PB.5879.3,PB.5879.1/PB.5879.2/PB.5879.4
Chr5	Intron retention	4119345	4118985	-	Chr5:4117768-4121359C	PB.5879.3,PB.5879.1/PB.5879.2/PB.5879.4
Chr5	Intron retention	4976944	4976929	-	Chr5:4976822-4981819C	PB.5899.1,PB.5899.2
Chr5	Alternative 3' splice site	6362412	6362409	-	Chr5:6358113-6363380C	PB.5918.2,PB.5918.1
Chr5	Intron retention	7765176	7765074	-	Chr5:7762186-7768310C	PB.5941.1,PB.5941.2
Chr5	Intron retention	8587878	8587810	-	Chr5:8584575-8589467C	PB.5952.3,PB.5952.2
Chr5	Alternative 5' splice site	13422600	13422560	-	Chr5:13421558-13424009C	PB.5986.2/PB.5986.4,PB.5986.1
Chr5	Exon skipping	13612799	13612702	-	Chr5:13610591-13614121C	PB.5990.1/PB.5990.3,PB.5990.2
Chr5	Exon skipping	16299343	16299291	-	Chr5:16297073-16300383C	PB.6023.3,PB.6023.1
Chr5	Intron retention	18723048	18722650	-	Chr5:18721309-18724890C	PB.6069.3,PB.6069.1/PB.6069.4
Chr5	Alternative 3' splice site	19845510	19845458	-	Chr5:19838515-19846590C	PB.6106.1,PB.6106.2
Chr5	Alternative 3' splice site	19958002	19957993	-	Chr5:19956672-19963120C	PB.6111.4,PB.6111.1/PB.6111.2/PB.6111.3/PB.6111.6
Chr5	Exon skipping	20570868	20570752	-	Chr5:20568921-20573631C	PB.6131.1,PB.6131.2
Chr5	Alternative 5' splice site	21420509	21420498	-	Chr5:21415005-21420677C	PB.6162.2,PB.6162.4/PB.6162.5
Chr5	Intron retention	21419506	21418825	-	Chr5:21415005-21420677C	PB.6162.5,PB.6162.2/PB.6162.4/PB.6162.6
Chr5	Alternative 5' splice site	21417849	21417838	-	Chr5:21415005-21420677C	PB.6162.4,PB.6162.2/PB.6162.5/PB.6162.6
Chr5	Alternative 3' splice site	21417243	21417240	-	Chr5:21415005-21420677C	PB.6162.6,PB.6162.2/PB.6162.4/PB.6162.5
Chr5	Exon skipping	22374642	22374607	-	Chr5:22374205-22380876C	PB.6193.1,PB.6193.2
Chr5	Alternative 3' splice site	22627974	22627958	-	Chr5:22625642-22629100C	PB.6206.2/PB.6206.3,PB.6206.1
Chr5	Alternative 5' splice site	22627311	22627295	-	Chr5:22625642-22629100C	PB.6206.2,PB.6206.1/PB.6206.3
Chr5	Intron retention	22840589	22840492	-	Chr5:22834920-22842055C	PB.6217.2,PB.6217.1/PB.6217.3/PB.6217.4
Chr5	Intron retention	24764044	24763108	-	Chr5:24762152-24767792C	PB.6276.2,PB.6276.1
Chr5	Intron retention	25334172	25333722	-	Chr5:25331818-25339640C	PB.6287.2,PB.6287.1/PB.6287.3
Chr5	Intron retention	25483364	25483280	-	Chr5:25477108-25484386C	PB.6291.2,PB.6291.1
Chr5	Intron retention	25788508	25788327	-	Chr5:25781692-25788539C	PB.6302.1/PB.6302.2/PB.6302.3/PB.6302.4,PB.6302.6
Chr5	Alternative 5' splice site	25786611	25786606	-	Chr5:25781692-25788539C	PB.6302.1/PB.6302.2/PB.6302.3/PB.6302.4/PB.6302.6,PB.6302.5
Chr5	Intron retention	25782933	25782688	-	Chr5:25781692-25788539C	PB.6302.5,PB.6302.1/PB.6302.2/PB.6302.3/PB.6302.4/PB.6302.6
Chr5	Intron retention	25806816	25806713	-	Chr5:25803607-25807155C	PB.6304.3,PB.6304.2
Chr5	Intron retention	27233365	27233225	-	Chr5:27229391-27233664C	PB.6356.4,PB.6356.1
Chr5	Intron retention	27233101	27232215	-	Chr5:27229391-27233664C	PB.6356.2,PB.6356.1/PB.6356.3
Chr5	Intron retention	27231533	27231264	-	Chr5:27229391-27233664C	PB.6356.3,PB.6356.1/PB.6356.2/PB.6356.4
Chr5	Intron retention	27652400	27652141	-	Chr5:27648087-27653692C	PB.6372.2,PB.6372.1
Chr5	Intron retention	27970250	27968980	-	Chr5:27967703-27970805C	PB.6392.2,PB.6392.1
Chr5	Intron retention	28554885	28554707	-	Chr5:28551299-28557304C	PB.6417.2,PB.6417.1/PB.6417.3
Chr5	Intron retention	28553533	28553373	-	Chr5:28551299-28557304C	PB.6417.2,PB.6417.1/PB.6417.3
Chr6	Alternative 3' splice site	186304	186324	+	Chr6:185718-188141W	PB.6480.2,PB.6480.1
Chr6	Alternative 5' splice site	231563	231567	+	Chr6:227842-232834W	PB.6484.1/PB.6484.2/PB.6484.3/PB.6484.5,PB.6484.4
Chr6	Alternative 3' splice site	887460	887463	+	Chr6:885828-892452W	PB.6513.3,PB.6513.1/PB.6513.4/PB.6513.5
Chr6	Intron retention	890566	890675	+	Chr6:885828-892452W	PB.6513.1,PB.6513.3/PB.6513.4/PB.6513.5/PB.6513.6
Chr6	Intron retention	2516076	2516182	+	Chr6:2515760-2517644W	PB.6564.1,PB.6564.2
Chr6	Alternative 5' splice site	2560533	2560548	+	Chr6:2557987-2562216W	PB.6568.1,PB.6568.2
Chr6	Intron retention	3922226	3922292	+	Chr6:3919529-3924393W	PB.6611.1/PB.6611.2/PB.6611.4/PB.6611.5,PB.6611.3
Chr6	Alternative 5' splice site	5365027	5365039	+	Chr6:5359580-5367042W	PB.6643.2,PB.6643.1
Chr6	Alternative 3' splice site	7577824	7577834	+	Chr6:7574953-7581785W	PB.6681.1,PB.6681.2
Chr6	Intron retention	8722913	8722933	+	Chr6:8720628-8726657W	PB.6704.2,PB.6704.1
Chr6	Intron retention	12435152	12435277	+	Chr6:12434087-12437459W	PB.6736.3,PB.6736.1/PB.6736.2/PB.6736.4
Chr6	Intron retention	14079266	14080804	+	Chr6:14078200-14082204W	PB.6755.2,PB.6755.1/PB.6755.3
Chr6	Alternative 5' splice site	17276102	17276123	+	Chr6:17272753-17280194W	PB.6785.2,PB.6785.1
Chr6	Intron retention	17315605	17315675	+	Chr6:17311220-17318619W	PB.6786.1/PB.6786.2/PB.6786.4,PB.6786.3
Chr6	Alternative 3' splice site	19737974	19737981	+	Chr6:19736515-19740890W	PB.6811.1,PB.6811.2
Chr6	Alternative 5' splice site	21500634	21500640	+	Chr6:21494954-21501333W	PB.6835.1,PB.6835.2
Chr6	Alternative 5' splice site	21658066	21658069	+	Chr6:21654907-21662250W	PB.6839.3,PB.6839.2
Chr6	Intron retention	22246294	22246410	+	Chr6:22245359-22251719W	PB.6849.3,PB.6849.1/PB.6849.2
Chr6	Intron retention	23183032	23183607	+	Chr6:23181175-23184500W	PB.6863.1,PB.6863.2
Chr6	Exon skipping	23345221	23345285	+	Chr6:23343922-23350850W	PB.6864.2,PB.6864.1/PB.6864.3/PB.6864.4
Chr6	Intron retention	23347017	23347125	+	Chr6:23343922-23350850W	PB.6864.2/PB.6864.3,PB.6864.1/PB.6864.4
Chr6	Intron retention	24227421	24227816	+	Chr6:24227321-24229332W	PB.6891.1,PB.6891.2/PB.6891.3
Chr6	Alternative 5' splice site	24492298	24492305	+	Chr6:24491986-24494128W	PB.6899.3,PB.6899.1/PB.6899.2
Chr6	Alternative 5' splice site	25690587	25690595	+	Chr6:25690136-25693854W	PB.6917.6/PB.6917.7,PB.6917.5
Chr6	Alternative 3' splice site	25691234	25691265	+	Chr6:25690136-25693854W	PB.6917.4,PB.6917.2/PB.6917.7
Chr6	Intron retention	25691701	25692159	+	Chr6:25690136-25693854W	PB.6917.3,PB.6917.1/PB.6917.2/PB.6917.5/PB.6917.7
Chr6	Intron retention	25691658	25692178	+	Chr6:25690136-25693854W	PB.6917.3,PB.6917.6
Chr6	Alternative 3' splice site	26265382	26265387	+	Chr6:26263150-26266732W	PB.6931.1,PB.6931.2
Chr6	Alternative 5' splice site	26537437	26537441	+	Chr6:26529318-26537963W	PB.6942.2,PB.6942.3
Chr6	Alternative 3' splice site	27416095	27416103	+	Chr6:27412678-27417549W	PB.6964.1/PB.6964.3,PB.6964.2
Chr6	Intron retention	27416678	27416880	+	Chr6:27412678-27417549W	PB.6964.3,PB.6964.1/PB.6964.2
Chr6	Alternative 3' splice site	28290065	28290074	+	Chr6:28286523-28293420W	PB.6986.2,PB.6986.1
Chr6	Alternative 5' splice site	28495393	28495413	+	Chr6:28495278-28497246W	PB.6996.1,PB.6996.2
Chr6	Intron retention	28586765	28586977	+	Chr6:28586501-28590222W	PB.6999.1,PB.6999.2
Chr6	Alternative 3' splice site	29724714	29724722	+	Chr6:29723530-29727132W	PB.7036.1,PB.7036.2
Chr6	Intron retention	30139151	30139230	+	Chr6:30136541-30141162W	PB.7060.1,PB.7060.2/PB.7060.3
Chr6	Intron retention	31129402	31129633	+	Chr6:31127385-31130681W	PB.7104.1,PB.7104.2/PB.7104.3
Chr6	Alternative 3' splice site	401994	401982	-	Chr6:398595-403494C	PB.6492.2,PB.6492.1
Chr6	Alternative 3' splice site	401510	401504	-	Chr6:398595-403494C	PB.6492.2,PB.6492.1
Chr6	Alternative 3' splice site	1374528	1374519	-	Chr6:1371852-1375413C	PB.6520.1,PB.6520.2
Chr6	Intron retention	1880129	1879592	-	Chr6:1876669-1880217C	PB.6543.1,PB.6543.2
Chr6	Alternative 5' splice site	2321799	2321755	-	Chr6:2320829-2329625C	PB.6561.1,PB.6561.2
Chr6	Intron retention	4214232	4214182	-	Chr6:4213273-4218155C	PB.6618.1,PB.6618.2
Chr6	Intron retention	5036785	5036624	-	Chr6:5036131-5041132C	PB.6638.2,PB.6638.1
Chr6	Intron retention	6162634	6161801	-	Chr6:6160817-6163694C	PB.6656.1,PB.6656.2
Chr6	Intron retention	8876816	8876739	-	Chr6:8875889-8877780C	PB.6707.1,PB.6707.2
Chr6	Intron retention	10693247	10693117	-	Chr6:10690756-10694139C	PB.6724.3,PB.6724.2
Chr6	Alternative 5' splice site	13604761	13604748	-	Chr6:13601944-13604913C	PB.6750.8,PB.6750.5
Chr6	Alternative 3' splice site	13604407	13604406	-	Chr6:13601944-13604913C	PB.6750.2/PB.6750.3/PB.6750.5/PB.6750.6/PB.6750.8,PB.6750.1/PB.6750.7
Chr6	Intron retention	13602698	13602603	-	Chr6:13601944-13604913C	PB.6750.7,PB.6750.8
Chr6	Exon skipping	15415684	15415557	-	Chr6:15414881-15423582C	PB.6764.1,PB.6764.2
Chr6	Intron retention	16743698	16743628	-	Chr6:16732926-16745664C	PB.6780.1,PB.6780.2
Chr6	Intron retention	18005983	18005750	-	Chr6:18002670-18009339C	PB.6796.2,PB.6796.1
Chr6	Intron retention	24920191	24918954	-	Chr6:24917374-24920280C	PB.6905.1,PB.6905.2
Chr6	Alternative 3' splice site	25593040	25593037	-	Chr6:25590322-25594438C	PB.6915.3,PB.6915.2
Chr6	Alternative 3' splice site	25721265	25721259	-	Chr6:25718152-25722316C	PB.6918.2,PB.6918.1
Chr6	Intron retention	25756674	25756598	-	Chr6:25754838-25757387C	PB.6921.3,PB.6921.1/PB.6921.2
Chr6	Alternative 3' splice site	25755629	25755623	-	Chr6:25754838-25757387C	PB.6921.1/PB.6921.3,PB.6921.2
Chr6	Alternative 3' splice site	28465809	28465380	-	Chr6:28463794-28466205C	PB.6993.2,PB.6993.1/PB.6993.4
Chr6	Intron retention	28507838	28507646	-	Chr6:28504142-28508816C	PB.6997.4,PB.6997.1/PB.6997.2/PB.6997.3/PB.6997.5
Chr6	Alternative 5' splice site	28506296	28506277	-	Chr6:28504142-28508816C	PB.6997.1/PB.6997.4/PB.6997.5,PB.6997.2/PB.6997.3
Chr6	Intron retention	28505481	28505360	-	Chr6:28504142-28508816C	PB.6997.2,PB.6997.1/PB.6997.3/PB.6997.4/PB.6997.5
Chr6	Intron retention	28666889	28666799	-	Chr6:28663519-28667855C	PB.7004.2,PB.7004.1
Chr6	Intron retention	29509626	29509503	-	Chr6:29508856-29515112C	PB.7029.1/PB.7029.3,PB.7029.2
Chr6	Intron retention	29707555	29707422	-	Chr6:29703587-29708691C	PB.7034.1,PB.7034.2
Chr6	Intron retention	29705999	29705623	-	Chr6:29703587-29708691C	PB.7034.6,PB.7034.5
Chr6	Alternative 5' splice site	29903231	29903198	-	Chr6:29902548-29904986C	PB.7044.2,PB.7044.1
Chr6	Intron retention	29980911	29980790	-	Chr6:29978895-29981912C	PB.7050.3,PB.7050.2
Chr6	Alternative 3' splice site	29979208	29979205	-	Chr6:29978895-29981912C	PB.7050.2,PB.7050.3
Chr6	Alternative 3' splice site	30455751	30455732	-	Chr6:30452419-30456223C	PB.7069.1,PB.7069.2
Chr6	Intron retention	30466526	30465738	-	Chr6:30464977-30468000C	PB.7070.2,PB.7070.1
Chr6	Intron retention	30772648	30772182	-	Chr6:30770718-30773886C	PB.7081.2,PB.7081.1
Chr6	Intron retention	31028023	31028007	-	Chr6:31025960-31028959C	PB.7095.2,PB.7095.1
Chr6	Intron retention	31204123	31204110	-	Chr6:31204030-31206789C	PB.7110.4,PB.7110.3
Chr7	Intron retention	18984	19064	+	Chr7:17473-21414W	PB.7114.3,PB.7114.1/PB.7114.2
Chr7	Exon skipping	38222	38268	+	Chr7:36138-42104W	PB.7115.1/PB.7115.2/PB.7115.4,PB.7115.3
Chr7	Intron retention	40287	40451	+	Chr7:36138-42104W	PB.7115.1,PB.7115.2/PB.7115.3/PB.7115.4
Chr7	Intron retention	515982	516071	+	Chr7:515793-521945W	PB.7137.2,PB.7137.3
Chr7	Intron retention	2009034	2009137	+	Chr7:2007642-2013025W	PB.7170.2,PB.7170.1
Chr7	Intron retention	2080797	2081080	+	Chr7:2080021-2083386W	PB.7171.2,PB.7171.1/PB.7171.3
Chr7	Intron retention	4734635	4734656	+	Chr7:4734551-4742806W	PB.7244.2,PB.7244.1
Chr7	Alternative 5' splice site	5660583	5660967	+	Chr7:5659652-5667629W	PB.7268.2,PB.7268.1
Chr7	Alternative 3' splice site	5664878	5664884	+	Chr7:5659652-5667629W	PB.7268.1,PB.7268.2
Chr7	Intron retention	5805513	5805625	+	Chr7:5805391-5811455W	PB.7272.3,PB.7272.2
Chr7	Alternative 3' splice site	5808016	5808019	+	Chr7:5805391-5811455W	PB.7272.2/PB.7272.3,PB.7272.1
Chr7	Intron retention	8140005	8140088	+	Chr7:8136992-8141055W	PB.7300.2,PB.7300.4
Chr7	Intron retention	8140135	8140502	+	Chr7:8136992-8141055W	PB.7300.3,PB.7300.4
Chr7	Exon skipping	12568223	12568271	+	Chr7:12565815-12570192W	PB.7326.2,PB.7326.1
Chr7	Intron retention	14918172	14918258	+	Chr7:14916036-14920432W	PB.7351.2,PB.7351.1/PB.7351.3
Chr7	Exon skipping	15340328	15340549	+	Chr7:15338993-15351157W	PB.7356.1,PB.7356.2
Chr7	Exon skipping	16768521	16768559	+	Chr7:16766326-16769620W	PB.7371.1,PB.7371.2
Chr7	Alternative 3' splice site	17282726	17282735	+	Chr7:17277653-17283499W	PB.7379.2,PB.7379.1
Chr7	Alternative 3' splice site	17908345	17908360	+	Chr7:17907612-17912261W	PB.7387.1/PB.7387.2,PB.7387.3
Chr7	Alternative 3' splice site	18594756	18594775	+	Chr7:18587415-18595396W	PB.7397.1/PB.7397.2,PB.7397.3
Chr7	Intron retention	18842382	18842409	+	Chr7:18840247-18842463W	PB.7404.1,PB.7404.2
Chr7	Mutually exclusive exon	20262470	20269116	+	Chr7:20257797-20287668W	PB.7438.2,PB.7438.3
Chr7	Intron retention	20343829	20344169	+	Chr7:20341021-20347706W	PB.7442.1,PB.7442.2
Chr7	Intron retention	23146352	23146440	+	Chr7:23145958-23149210W	PB.7513.3,PB.7513.1/PB.7513.2
Chr7	Intron retention	23928511	23928595	+	Chr7:23925986-23931721W	PB.7544.2,PB.7544.1/PB.7544.3/PB.7544.4/PB.7544.5
Chr7	Intron retention	24721665	24721796	+	Chr7:24720362-24723682W	PB.7565.1,PB.7565.2
Chr7	Intron retention	25931921	25932020	+	Chr7:25931635-25936540W	PB.7604.2,PB.7604.3
Chr7	Alternative 5' splice site	26233545	26233548	+	Chr7:26230671-26240863W	PB.7622.1,PB.7622.2
Chr7	Alternative 3' splice site	26420777	26420788	+	Chr7:26416979-26429287W	PB.7632.1,PB.7632.2
Chr7	Intron retention	27616601	27616698	+	Chr7:27615346-27618625W	PB.7660.1,PB.7660.2
Chr7	Intron retention	28164492	28164620	+	Chr7:28164424-28169585W	PB.7684.1,PB.7684.2
Chr7	Intron retention	28166712	28166815	+	Chr7:28164424-28169585W	PB.7684.3,PB.7684.1/PB.7684.2/PB.7684.4/PB.7684.5
Chr7	Exon skipping	28403736	28403844	+	Chr7:28402326-28409574W	PB.7694.2,PB.7694.1
Chr7	Alternative 3' splice site	28910761	28910773	+	Chr7:28909087-28914249W	PB.7715.1/PB.7715.2,PB.7715.3
Chr7	Intron retention	29005172	29005251	+	Chr7:29004222-29006157W	PB.7720.2,PB.7720.1
Chr7	Alternative 3' splice site	29395535	29395538	+	Chr7:29392464-29403043W	PB.7734.1/PB.7734.2/PB.7734.4/PB.7734.5,PB.7734.3
Chr7	Exon skipping	29400012	29400447	+	Chr7:29392464-29403043W	PB.7734.2,PB.7734.1/PB.7734.3/PB.7734.4
Chr7	Intron retention	29485941	29486081	+	Chr7:29484546-29487368W	PB.7739.2,PB.7739.1/PB.7739.3/PB.7739.4
Chr7	Alternative 3' splice site	29541489	29541492	+	Chr7:29534469-29545692W	PB.7745.1,PB.7745.2
Chr7	Intron retention	447516	447365	-	Chr7:446200-451437C	PB.7134.5,PB.7134.1/PB.7134.3/PB.7134.6
Chr7	Intron retention	1834642	1834277	-	Chr7:1832963-1835804C	PB.7166.1,PB.7166.2
Chr7	Intron retention	3272975	3272551	-	Chr7:3270392-3275916C	PB.7200.2,PB.7200.1
Chr7	Intron retention	3290193	3290099	-	Chr7:3288478-3293238C	PB.7201.1,PB.7201.2
Chr7	Alternative 3' splice site	3728838	3728829	-	Chr7:3726594-3731166C	PB.7218.2/PB.7218.3,PB.7218.1/PB.7218.4
Chr7	Alternative 3' splice site	3727338	3727266	-	Chr7:3726594-3731166C	PB.7218.2,PB.7218.3
Chr7	Intron retention	6763623	6763601	-	Chr7:6763546-6767323C	PB.7282.2,PB.7282.1
Chr7	Intron retention	10820975	10820843	-	Chr7:10817314-10825076C	PB.7313.1,PB.7313.2
Chr7	Alternative 5' splice site	11866824	11866818	-	Chr7:11865536-11874310C	PB.7321.2,PB.7321.1
Chr7	Intron retention	11892896	11892600	-	Chr7:11887201-11894347C	PB.7322.3,PB.7322.2
Chr7	Exon skipping	12655795	12655709	-	Chr7:12652875-12656455C	PB.7328.1/PB.7328.3,PB.7328.2
Chr7	Alternative 5' splice site	12921016	12920794	-	Chr7:12916271-12924376C	PB.7333.5,PB.7333.1/PB.7333.2/PB.7333.4/PB.7333.6/PB.7333.8
Chr7	Intron retention	12920794	12920476	-	Chr7:12916271-12924376C	PB.7333.3/PB.7333.7,PB.7333.1/PB.7333.2/PB.7333.4/PB.7333.6/PB.7333.8
Chr7	Intron retention	12921016	12920476	-	Chr7:12916271-12924376C	PB.7333.3/PB.7333.7,PB.7333.5
Chr7	Alternative 3' splice site	18254490	18254470	-	Chr7:18253682-18257909C	PB.7392.2,PB.7392.1
Chr7	Alternative 3' splice site	18918097	18918080	-	Chr7:18914987-18920649C	PB.7405.1/PB.7405.3,PB.7405.2
Chr7	Alternative 3' splice site	23050419	23050413	-	Chr7:23049449-23053873C	PB.7510.1/PB.7510.3,PB.7510.2
Chr7	Intron retention	24139586	24139402	-	Chr7:24137919-24142912C	PB.7549.2,PB.7549.1
Chr7	Intron retention	26053790	26053688	-	Chr7:26052222-26055859C	PB.7613.2,PB.7613.1/PB.7613.3
Chr7	Exon skipping	26484555	26484526	-	Chr7:26481463-26485291C	PB.7635.1/PB.7635.3/PB.7635.4,PB.7635.2
Chr7	Intron retention	26483092	26482358	-	Chr7:26481463-26485291C	PB.7635.3,PB.7635.1/PB.7635.2/PB.7635.4
Chr7	Intron retention	28274084	28274009	-	Chr7:28272289-28276781C	PB.7689.3/PB.7689.5,PB.7689.1/PB.7689.2/PB.7689.4
Chr7	Intron retention	28273246	28273145	-	Chr7:28272289-28276781C	PB.7689.3/PB.7689.4,PB.7689.1/PB.7689.2
Chr7	Alternative 5' splice site	28474018	28474007	-	Chr7:28469793-28474153C	PB.7697.1,PB.7697.4
Chr7	Intron retention	28471379	28470777	-	Chr7:28469793-28474153C	PB.7697.3,PB.7697.1
Chr7	Intron retention	28471379	28470402	-	Chr7:28469793-28474153C	PB.7697.3,PB.7697.2/PB.7697.4
Chr7	Exon skipping	29585369	29585290	-	Chr7:29583717-29586299C	PB.7749.1/PB.7749.2/PB.7749.3/PB.7749.4/PB.7749.5/PB.7749.9,PB.7749.6
Chr7	Intron retention	29585446	29585087	-	Chr7:29583717-29586299C	PB.7749.7,PB.7749.1/PB.7749.2/PB.7749.3/PB.7749.4/PB.7749.5/PB.7749.9
Chr7	Intron retention	29585446	29585087	-	Chr7:29583717-29586299C	PB.7749.7,PB.7749.6
Chr7	Intron retention	29584833	29584716	-	Chr7:29583717-29586299C	PB.7749.4,PB.7749.1/PB.7749.2/PB.7749.3/PB.7749.5/PB.7749.6/PB.7749.7/PB.7749.9
Chr8	Intron retention	188476	188571	+	Chr8:187111-190814W	PB.7759.1/PB.7759.2/PB.7759.4,PB.7759.3
Chr8	Alternative 3' splice site	189509	189519	+	Chr8:187111-190814W	PB.7759.2/PB.7759.3/PB.7759.4,PB.7759.1
Chr8	Exon skipping	575969	576187	+	Chr8:572751-578330W	PB.7780.1,PB.7780.2
Chr8	Intron retention	949592	949960	+	Chr8:948833-952670W	PB.7791.2,PB.7791.1
Chr8	Exon skipping	950604	950796	+	Chr8:948833-952670W	PB.7791.2,PB.7791.1
Chr8	Exon skipping	3361296	3361373	+	Chr8:3360840-3373406W	PB.7853.10/PB.7853.7/PB.7853.8/PB.7853.9,PB.7853.1/PB.7853.2/PB.7853.3/PB.7853.4/PB.7853.5/PB.7853.6
Chr8	Alternative 5' splice site	3361701	3361731	+	Chr8:3360840-3373406W	PB.7853.1/PB.7853.3/PB.7853.5/PB.7853.6/PB.7853.7/PB.7853.9,PB.7853.8
Chr8	Exon skipping	3362333	3362364	+	Chr8:3360840-3373406W	PB.7853.10/PB.7853.2,PB.7853.1/PB.7853.3/PB.7853.5/PB.7853.6/PB.7853.7/PB.7853.9
Chr8	Alternative 3' splice site	3365888	3365914	+	Chr8:3360840-3373406W	PB.7853.10/PB.7853.2/PB.7853.6/PB.7853.7/PB.7853.8/PB.7853.9,PB.7853.1/PB.7853.3/PB.7853.4/PB.7853.5
Chr8	Alternative 3' splice site	3366381	3366397	+	Chr8:3360840-3373406W	PB.7853.4,PB.7853.10/PB.7853.2/PB.7853.3/PB.7853.5/PB.7853.8/PB.7853.9
Chr8	Intron retention	3366235	3366397	+	Chr8:3360840-3373406W	PB.7853.1/PB.7853.6/PB.7853.7,PB.7853.10/PB.7853.2/PB.7853.3/PB.7853.5/PB.7853.8/PB.7853.9
Chr8	Intron retention	3366235	3366381	+	Chr8:3360840-3373406W	PB.7853.1/PB.7853.6/PB.7853.7,PB.7853.4
Chr8	Exon skipping	4240640	4240752	+	Chr8:4237024-4242575W	PB.7873.1,PB.7873.2
Chr8	Intron retention	4241200	4241708	+	Chr8:4237024-4242575W	PB.7873.2,PB.7873.1
Chr8	Intron retention	4701999	4702039	+	Chr8:4700677-4708407W	PB.7884.2,PB.7884.1
Chr8	Alternative 3' splice site	7543932	7543961	+	Chr8:7539473-7548164W	PB.7922.1,PB.7922.2
Chr8	Intron retention	8680050	8680148	+	Chr8:8677966-8681473W	PB.7938.2,PB.7938.1/PB.7938.3
Chr8	Intron retention	9002083	9002190	+	Chr8:9001792-9005331W	PB.7945.2/PB.7945.3,PB.7945.1
Chr8	Intron retention	14357234	14357340	+	Chr8:14356981-14360890W	PB.7995.1,PB.7995.2
Chr8	Intron retention	16983007	16984656	+	Chr8:16982282-16985261W	PB.8025.2,PB.8025.1
Chr8	Alternative 3' splice site	18477534	18477545	+	Chr8:18474194-18480739W	PB.8044.2,PB.8044.1
Chr8	Alternative 5' splice site	19430830	19430835	+	Chr8:19427423-19432710W	PB.8054.2,PB.8054.1
Chr8	Intron retention	21446903	21447010	+	Chr8:21445978-21450802W	PB.8087.2,PB.8087.1
Chr8	Exon skipping	22888557	22888669	+	Chr8:22887445-22892643W	PB.8109.2/PB.8109.3,PB.8109.1
Chr8	Intron retention	22889196	22889417	+	Chr8:22887445-22892643W	PB.8109.2,PB.8109.1/PB.8109.3
Chr8	Intron retention	24311243	24311376	+	Chr8:24311145-24314850W	PB.8142.1,PB.8142.2
Chr8	Intron retention	24563089	24563194	+	Chr8:24560915-24566106W	PB.8148.2,PB.8148.1
Chr8	Exon skipping	24689644	24689814	+	Chr8:24685261-24694485W	PB.8153.1,PB.8153.2
Chr8	Intron retention	25482233	25482245	+	Chr8:25481953-25487507W	PB.8182.1,PB.8182.2
Chr8	Intron retention	25483158	25483369	+	Chr8:25481953-25487507W	PB.8182.1/PB.8182.3,PB.8182.2/PB.8182.4
Chr8	Alternative 5' splice site	26785854	26785858	+	Chr8:26785723-26791065W	PB.8222.1/PB.8222.2,PB.8222.3
Chr8	Exon skipping	26789865	26790012	+	Chr8:26785723-26791065W	PB.8222.3,PB.8222.2
Chr8	Intron retention	26790012	26790100	+	Chr8:26785723-26791065W	PB.8222.1,PB.8222.2
Chr8	Alternative 3' splice site	26789865	26790100	+	Chr8:26785723-26791065W	PB.8222.1,PB.8222.3
Chr8	Alternative 3' splice site	27705046	27705052	+	Chr8:27703403-27707211W	PB.8254.2,PB.8254.1
Chr8	Alternative 5' splice site	27763635	27763643	+	Chr8:27761869-27794157W	PB.8257.1/PB.8257.2,PB.8257.3
Chr8	Intron retention	27764014	27764121	+	Chr8:27761869-27794157W	PB.8257.3,PB.8257.1/PB.8257.2
Chr8	Alternative 3' splice site	27894427	27894435	+	Chr8:27893361-27898769W	PB.8265.2,PB.8265.1
Chr8	Alternative 3' splice site	27995657	27995669	+	Chr8:27991543-27999300W	PB.8275.2,PB.8275.1
Chr8	Intron retention	28070192	28070337	+	Chr8:28069291-28074612W	PB.8278.1,PB.8278.2
Chr8	Intron retention	91334	91244	-	Chr8:87765-91976C	PB.7754.1,PB.7754.2
Chr8	Intron retention	91333	91219	-	Chr8:87765-91976C	PB.7754.1,PB.7754.3
Chr8	Exon skipping	119215	119123	-	Chr8:111584-121079C	PB.7757.3,PB.7757.1/PB.7757.2
Chr8	Alternative 3' splice site	585774	585769	-	Chr8:580351-586328C	PB.7781.3,PB.7781.4
Chr8	Intron retention	2213659	2213476	-	Chr8:2210026-2213892C	PB.7831.2,PB.7831.1
Chr8	Intron retention	2213659	2212849	-	Chr8:2210026-2213892C	PB.7831.3/PB.7831.4,PB.7831.1
Chr8	Intron retention	2213206	2212849	-	Chr8:2210026-2213892C	PB.7831.3/PB.7831.4,PB.7831.2
Chr8	Intron retention	2211782	2211640	-	Chr8:2210026-2213892C	PB.7831.4,PB.7831.1/PB.7831.2/PB.7831.3
Chr8	Intron retention	2312356	2312195	-	Chr8:2310006-2315261C	PB.7832.2,PB.7832.1/PB.7832.3
Chr8	Intron retention	3393287	3393277	-	Chr8:3389032-3393453C	PB.7854.1/PB.7854.4,PB.7854.3
Chr8	Alternative 3' splice site	3391391	3391388	-	Chr8:3389032-3393453C	PB.7854.3,PB.7854.1/PB.7854.2/PB.7854.4
Chr8	Alternative 3' splice site	3462982	3462966	-	Chr8:3460779-3463758C	PB.7857.1/PB.7857.3,PB.7857.2
Chr8	Intron retention	4388471	4388391	-	Chr8:4385738-4388987C	PB.7875.2,PB.7875.1/PB.7875.3
Chr8	Intron retention	4620235	4620082	-	Chr8:4617510-4620467C	PB.7880.3,PB.7880.2/PB.7880.4
Chr8	Exon skipping	5376888	5376724	-	Chr8:5373329-5377117C	PB.7897.1,PB.7897.4
Chr8	Intron retention	5422814	5422789	-	Chr8:5422246-5426677C	PB.7902.2,PB.7902.1
Chr8	Alternative 5' splice site	5812760	5812721	-	Chr8:5811261-5816125C	PB.7909.1,PB.7909.2
Chr8	Intron retention	7347935	7347609	-	Chr8:7338954-7348122C	PB.7921.5,PB.7921.2/PB.7921.4
Chr8	Alternative 3' splice site	7347195	7347194	-	Chr8:7338954-7348122C	PB.7921.2/PB.7921.4/PB.7921.5,PB.7921.3
Chr8	Intron retention	8113813	8112963	-	Chr8:8107761-8116243C	PB.7932.1,PB.7932.2
Chr8	Intron retention	8344938	8344218	-	Chr8:8342252-8346642C	PB.7935.2,PB.7935.1
Chr8	Intron retention	10624100	10624017	-	Chr8:10621776-10625434C	PB.7962.1/PB.7962.2,PB.7962.3
Chr8	Alternative 5' splice site	10623702	10623674	-	Chr8:10621776-10625434C	PB.7962.3,PB.7962.1
Chr8	Exon skipping	10623813	10623674	-	Chr8:10621776-10625434C	PB.7962.2,PB.7962.1
Chr8	Exon skipping	10623813	10623702	-	Chr8:10621776-10625434C	PB.7962.2,PB.7962.3
Chr8	Intron retention	10623907	10623594	-	Chr8:10621776-10625434C	PB.7962.4,PB.7962.2
Chr8	Intron retention	10623907	10623594	-	Chr8:10621776-10625434C	PB.7962.4,PB.7962.1
Chr8	Intron retention	10624100	10623594	-	Chr8:10621776-10625434C	PB.7962.4,PB.7962.3
Chr8	Alternative 3' splice site	11875168	11875132	-	Chr8:11869962-11879546C	PB.7976.1/PB.7976.4,PB.7976.2/PB.7976.5
Chr8	Intron retention	11875252	11875168	-	Chr8:11869962-11879546C	PB.7976.6,PB.7976.1/PB.7976.4
Chr8	Intron retention	11875252	11875132	-	Chr8:11869962-11879546C	PB.7976.6,PB.7976.2/PB.7976.5
Chr8	Intron retention	11874987	11874222	-	Chr8:11869962-11879546C	PB.7976.3,PB.7976.6
Chr8	Intron retention	11875252	11874222	-	Chr8:11869962-11879546C	PB.7976.3,PB.7976.1/PB.7976.4
Chr8	Intron retention	11875252	11874222	-	Chr8:11869962-11879546C	PB.7976.3,PB.7976.2/PB.7976.5
Chr8	Exon skipping	11872573	11872220	-	Chr8:11869962-11879546C	PB.7976.1/PB.7976.2/PB.7976.3/PB.7976.6,PB.7976.4/PB.7976.5
Chr8	Alternative 5' splice site	13988016	13988011	-	Chr8:13984205-13988089C	PB.7989.6,PB.7989.3
Chr8	Intron retention	13988016	13987923	-	Chr8:13984205-13988089C	PB.7989.1/PB.7989.9,PB.7989.10
Chr8	Alternative 5' splice site	15206976	15206965	-	Chr8:15203197-15212000C	PB.8007.2,PB.8007.1
Chr8	Alternative 3' splice site	15205478	15205445	-	Chr8:15203197-15212000C	PB.8007.2,PB.8007.1
Chr8	Intron retention	18104902	18104864	-	Chr8:18103283-18108358C	PB.8035.1,PB.8035.2
Chr8	Alternative 3' splice site	22046535	22046524	-	Chr8:22038805-22048615C	PB.8097.1,PB.8097.5
Chr8	Alternative 5' splice site	22041241	22041094	-	Chr8:22038805-22048615C	PB.8097.1,PB.8097.3/PB.8097.5
Chr8	Intron retention	22041241	22040994	-	Chr8:22038805-22048615C	PB.8097.2,PB.8097.1
Chr8	Intron retention	22041094	22040994	-	Chr8:22038805-22048615C	PB.8097.2,PB.8097.3/PB.8097.5
Chr8	Intron retention	23722112	23721510	-	Chr8:23717830-23722184C	PB.8125.1,PB.8125.4
Chr8	Intron retention	23718609	23718362	-	Chr8:23717830-23722184C	PB.8125.5,PB.8125.1/PB.8125.3
Chr8	Intron retention	24594394	24594161	-	Chr8:24593298-24594805C	PB.8151.2,PB.8151.1
Chr8	Intron retention	24829909	24829705	-	Chr8:24828141-24830860C	PB.8161.2,PB.8161.1
Chr8	Intron retention	25863388	25863110	-	Chr8:25858891-25864888C	PB.8188.3,PB.8188.1/PB.8188.2/PB.8188.4
Chr8	Intron retention	27557141	27556569	-	Chr8:27555337-27559376C	PB.8249.2,PB.8249.1
Chr8	Intron retention	27827894	27827789	-	Chr8:27825152-27830257C	PB.8259.1/PB.8259.3,PB.8259.2
Chr8	Intron retention	28124421	28123945	-	Chr8:28123308-28126337C	PB.8281.7,PB.8281.6
Chr8	Alternative 5' splice site	28123641	28123640	-	Chr8:28123308-28126337C	PB.8281.3,PB.8281.6
Chr8	Exon skipping	28181402	28181295	-	Chr8:28173392-28181700C	PB.8286.4/PB.8286.5,PB.8286.1
Chr8	Intron retention	28253918	28253801	-	Chr8:28250427-28254000C	PB.8288.1/PB.8288.2,PB.8288.5
Chr8	Intron retention	28250774	28250596	-	Chr8:28250427-28254000C	PB.8288.1,PB.8288.2
Chr8	Intron retention	28350082	28349968	-	Chr8:28348018-28351728C	PB.8294.2,PB.8294.1
Chr9	Alternative 5' splice site	884031	884076	+	Chr9:878141-889687W	PB.8311.1,PB.8311.2
Chr9	Alternative 3' splice site	2559166	2559188	+	Chr9:2557172-2561144W	PB.8335.2,PB.8335.1
Chr9	Intron retention	6017199	6017899	+	Chr9:6016411-6020376W	PB.8374.6,PB.8374.1
Chr9	Intron retention	6017199	6017899	+	Chr9:6016411-6020376W	PB.8374.4,PB.8374.3
Chr9	Intron retention	6016489	6016771	+	Chr9:6016411-6020376W	PB.8374.4,PB.8374.6
Chr9	Intron retention	14416420	14416439	+	Chr9:14410220-14416595W	PB.8470.2,PB.8470.1
Chr9	Intron retention	15283486	15283569	+	Chr9:15281304-15285743W	PB.8493.4,PB.8493.1/PB.8493.3
Chr9	Intron retention	16050836	16050925	+	Chr9:16049213-16074021W	PB.8506.2,PB.8506.1
Chr9	Exon skipping	16068901	16069609	+	Chr9:16049213-16074021W	PB.8506.4,PB.8506.3
Chr9	Alternative 5' splice site	17407555	17407575	+	Chr9:17405820-17413196W	PB.8548.1,PB.8548.2
Chr9	Intron retention	18212111	18212873	+	Chr9:18209462-18214918W	PB.8574.3,PB.8574.2
Chr9	Intron retention	19104563	19104573	+	Chr9:19104012-19108917W	PB.8607.1,PB.8607.2/PB.8607.3
Chr9	Alternative 5' splice site	19148768	19148770	+	Chr9:19148030-19149902W	PB.8609.2,PB.8609.3
Chr9	Intron retention	19567413	19568065	+	Chr9:19566187-19568842W	PB.8626.1,PB.8626.2
Chr9	Intron retention	19572117	19572224	+	Chr9:19569996-19575622W	PB.8627.3,PB.8627.1/PB.8627.2
Chr9	Alternative 5' splice site	20236756	20236899	+	Chr9:20236457-20240547W	PB.8658.2,PB.8658.1
Chr9	Intron retention	20237286	20237390	+	Chr9:20236457-20240547W	PB.8658.3,PB.8658.4
Chr9	Intron retention	20368799	20368908	+	Chr9:20367500-20371222W	PB.8661.2,PB.8661.3
Chr9	Alternative 3' splice site	20655164	20655173	+	Chr9:20654763-20659183W	PB.8670.1,PB.8670.2
Chr9	Intron retention	21920212	21920316	+	Chr9:21917324-21922429W	PB.8719.1,PB.8719.2/PB.8719.3
Chr9	Intron retention	21921178	21921267	+	Chr9:21917324-21922429W	PB.8719.3,PB.8719.1/PB.8719.2
Chr9	Intron retention	22195268	22195478	+	Chr9:22192661-22197185W	PB.8735.3,PB.8735.1/PB.8735.2
Chr9	Intron retention	22645255	22645861	+	Chr9:22644753-22648634W	PB.8755.2,PB.8755.1
Chr9	Intron retention	22934880	22934978	+	Chr9:22934006-22939026W	PB.8777.4,PB.8777.1/PB.8777.2
Chr9	Intron retention	859311	858549	-	Chr9:854817-860491C	PB.8310.2,PB.8310.1
Chr9	Intron retention	995315	995207	-	Chr9:993697-995632C	PB.8314.1,PB.8314.2
Chr9	Intron retention	1217837	1217636	-	Chr9:1212952-1217975C	PB.8317.1,PB.8317.2
Chr9	Intron retention	1217856	1217638	-	Chr9:1212952-1217975C	PB.8317.1,PB.8317.3
Chr9	Intron retention	7249702	7249611	-	Chr9:7245407-7249723C	PB.8382.1,PB.8382.2
Chr9	Alternative 5' splice site	11925786	11925755	-	Chr9:11920232-11925976C	PB.8431.5,PB.8431.2/PB.8431.4
Chr9	Intron retention	11922769	11922624	-	Chr9:11920232-11925976C	PB.8431.4,PB.8431.1/PB.8431.2/PB.8431.3/PB.8431.5/PB.8431.6
Chr9	Alternative 3' splice site	15078717	15078711	-	Chr9:15076237-15079328C	PB.8486.3,PB.8486.1
Chr9	Intron retention	15078822	15078711	-	Chr9:15076237-15079328C	PB.8486.2,PB.8486.1
Chr9	Intron retention	15078822	15078717	-	Chr9:15076237-15079328C	PB.8486.2,PB.8486.3
Chr9	Intron retention	16549660	16549376	-	Chr9:16543036-16549745C	PB.8524.1,PB.8524.2
Chr9	Intron retention	16995232	16994761	-	Chr9:16991784-16996040C	PB.8535.1/PB.8535.4/PB.8535.5,PB.8535.3
Chr9	Alternative 3' splice site	16994021	16994007	-	Chr9:16991784-16996040C	PB.8535.2,PB.8535.1/PB.8535.3/PB.8535.4/PB.8535.5
Chr9	Alternative 3' splice site	16993604	16993599	-	Chr9:16991784-16996040C	PB.8535.1/PB.8535.2/PB.8535.3/PB.8535.5,PB.8535.4
Chr9	Intron retention	17254346	17254202	-	Chr9:17252026-17255532C	PB.8544.2,PB.8544.1
Chr9	Exon skipping	20530864	20530820	-	Chr9:20528873-20532202C	PB.8665.1,PB.8665.2
Chr9	Intron retention	20538742	20538634	-	Chr9:20535270-20540250C	PB.8666.2,PB.8666.1
Chr9	Intron retention	20978161	20978012	-	Chr9:20976419-20980719C	PB.8687.3,PB.8687.1/PB.8687.5/PB.8687.7/PB.8687.8
Chr9	Intron retention	20978161	20977679	-	Chr9:20976419-20980719C	PB.8687.2/PB.8687.6,PB.8687.1/PB.8687.5/PB.8687.7/PB.8687.8
Chr9	Intron retention	20977865	20977679	-	Chr9:20976419-20980719C	PB.8687.2/PB.8687.6,PB.8687.3
Chr9	Alternative 3' splice site	22570072	22570066	-	Chr9:22566579-22572704C	PB.8751.1,PB.8751.2
Chr9	Intron retention	22797343	22797254	-	Chr9:22793287-22797811C	PB.8773.3,PB.8773.2
ChrSy	Intron retention	74597	75141	+	ChrSy:73905-78727W	PB.8778.2,PB.8778.1/PB.8778.3/PB.8778.4
ChrUn	Intron retention	623685	623569	-	ChrUn:621501-625304C	PB.8784.3,PB.8784.1/PB.8784.2/PB.8784.4

## Sheet: F03
Table S2 Splice junctions and AS modes with different ploidy levels
Chrom	AS_event	Event_start	Event_end	Strand	Gene_location	Transcript_id
Chr1	Intron retention	19629	19731	+	Chr1:16290-20318W	PB.2.1,PB.2.4
Chr1	Alternative 3' splice site	598707	598759	+	Chr1:598266-601469W	PB.43.1,PB.43.2
Chr1	Alternative 3' splice site	598707	598764	+	Chr1:598266-601469W	PB.43.1,PB.43.3
Chr1	Alternative 3' splice site	598759	598764	+	Chr1:598266-601469W	PB.43.2,PB.43.3
Chr1	Intron retention	599386	599406	+	Chr1:598266-601469W	PB.43.1/PB.43.3,PB.43.2
Chr1	Intron retention	1415720	1416221	+	Chr1:1413870-1418990W	PB.65.1,PB.65.2
Chr1	Intron retention	1853965	1854211	+	Chr1:1849891-1855909W	PB.80.3,PB.80.1/PB.80.2
Chr1	Intron retention	6118252	6118451	+	Chr1:6112815-6125503W	PB.211.1/PB.211.3,PB.211.2
Chr1	Alternative 5' splice site	6122238	6122239	+	Chr1:6112815-6125503W	PB.211.2/PB.211.3,PB.211.1
Chr1	Intron retention	6320295	6320392	+	Chr1:6319231-6322333W	PB.215.2,PB.215.1/PB.215.3
Chr1	Intron retention	7666934	7667055	+	Chr1:7665370-7668116W	PB.264.2,PB.264.1
Chr1	Alternative 5' splice site	8300712	8300716	+	Chr1:8297577-8302428W	PB.276.1,PB.276.2
Chr1	Intron retention	10824705	10824779	+	Chr1:10822577-10827175W	PB.347.4,PB.347.2/PB.347.3
Chr1	Alternative 3' splice site	11664433	11664443	+	Chr1:11655176-11666373W	PB.363.1,PB.363.2
Chr1	Intron retention	11961589	11961674	+	Chr1:11958830-11964682W	PB.371.4,PB.371.1/PB.371.2/PB.371.3
Chr1	Intron retention	11963102	11963141	+	Chr1:11958830-11964682W	PB.371.1/PB.371.3/PB.371.4,PB.371.2
Chr1	Intron retention	13455314	13455960	+	Chr1:13452996-13458020W	PB.392.1,PB.392.2
Chr1	Intron retention	13891784	13892232	+	Chr1:13887372-13893276W	PB.393.1,PB.393.2/PB.393.3
Chr1	Intron retention	17153454	17153535	+	Chr1:17151719-17157981W	PB.426.1/PB.426.10/PB.426.11/PB.426.12/PB.426.13/PB.426.14/PB.426.2/PB.426.3/PB.426.4/PB.426.5/PB.426.6/PB.426.8/PB.426.9,PB.426.7
Chr1	Intron retention	17154309	17154389	+	Chr1:17151719-17157981W	PB.426.11/PB.426.2/PB.426.3,PB.426.1/PB.426.10/PB.426.13/PB.426.4/PB.426.5/PB.426.7/PB.426.8
Chr1	Exon skipping	17154389	17154484	+	Chr1:17151719-17157981W	PB.426.12/PB.426.14/PB.426.6/PB.426.9,PB.426.1/PB.426.10/PB.426.13/PB.426.4/PB.426.5/PB.426.7/PB.426.8
Chr1	Alternative 5' splice site	17154309	17154484	+	Chr1:17151719-17157981W	PB.426.12/PB.426.14/PB.426.6/PB.426.9,PB.426.11/PB.426.2/PB.426.3
Chr1	Alternative 3' splice site	17157517	17157519	+	Chr1:17151719-17157981W	PB.426.13,PB.426.14
Chr1	Intron retention	17157411	17157519	+	Chr1:17151719-17157981W	PB.426.11/PB.426.12/PB.426.7/PB.426.8,PB.426.14
Chr1	Intron retention	17157411	17157517	+	Chr1:17151719-17157981W	PB.426.11/PB.426.12/PB.426.7/PB.426.8,PB.426.13
Chr1	Intron retention	17157411	17157517	+	Chr1:17151719-17157981W	PB.426.2,PB.426.9
Chr1	Intron retention	17349402	17349566	+	Chr1:17349335-17350803W	PB.433.2/PB.433.4,PB.433.5
Chr1	Intron retention	19012655	19013416	+	Chr1:19009705-19014143W	PB.464.1,PB.464.2
Chr1	Alternative 3' splice site	21415237	21415240	+	Chr1:21414971-21441443W	PB.497.2,PB.497.1
Chr1	Intron retention	22125097	22125646	+	Chr1:22120362-22128744W	PB.512.4/PB.512.6,PB.512.2/PB.512.3/PB.512.5
Chr1	Intron retention	22428512	22429268	+	Chr1:22427799-22430836W	PB.516.3,PB.516.1/PB.516.2
Chr1	Intron retention	22429608	22429843	+	Chr1:22427799-22430836W	PB.516.1/PB.516.3,PB.516.2
Chr1	Alternative 3' splice site	22770054	22770060	+	Chr1:22768072-22772566W	PB.525.2,PB.525.3
Chr1	Intron retention	24141452	24141625	+	Chr1:24136873-24144332W	PB.553.2,PB.553.1/PB.553.3
Chr1	Intron retention	24143479	24143561	+	Chr1:24136873-24144332W	PB.553.3,PB.553.1/PB.553.2
Chr1	Intron retention	24896628	24896867	+	Chr1:24894706-24899531W	PB.585.1/PB.585.3,PB.585.2/PB.585.4
Chr1	Alternative 3' splice site	25133756	25133851	+	Chr1:25132890-25138136W	PB.593.1,PB.593.3/PB.593.4
Chr1	Intron retention	25134943	25135822	+	Chr1:25132890-25138136W	PB.593.2/PB.593.4,PB.593.1/PB.593.3
Chr1	Intron retention	25136548	25137083	+	Chr1:25132890-25138136W	PB.593.2,PB.593.1/PB.593.3/PB.593.4
Chr1	Intron retention	25516378	25516467	+	Chr1:25513951-25518161W	PB.601.5,PB.601.1
Chr1	Intron retention	25516378	25516597	+	Chr1:25513951-25518161W	PB.601.5,PB.601.3
Chr1	Intron retention	25516804	25517118	+	Chr1:25513951-25518161W	PB.601.4,PB.601.5
Chr1	Intron retention	25516378	25517118	+	Chr1:25513951-25518161W	PB.601.4,PB.601.1
Chr1	Intron retention	25516378	25517118	+	Chr1:25513951-25518161W	PB.601.4,PB.601.3
Chr1	Exon skipping	25700122	25700396	+	Chr1:25696671-25705081W	PB.604.3/PB.604.4,PB.604.2
Chr1	Intron retention	25701007	25703358	+	Chr1:25696671-25705081W	PB.604.4,PB.604.2/PB.604.3
Chr1	Alternative 3' splice site	27126516	27126524	+	Chr1:27123419-27129399W	PB.638.2,PB.638.1
Chr1	Intron retention	28729170	28729250	+	Chr1:28729115-28735114W	PB.690.1/PB.690.2/PB.690.3,PB.690.4
Chr1	Intron retention	28732720	28732991	+	Chr1:28729115-28735114W	PB.690.1,PB.690.2/PB.690.3/PB.690.4
Chr1	Intron retention	28887074	28887496	+	Chr1:28885408-28890830W	PB.696.2,PB.696.1
Chr1	Alternative 5' splice site	29503404	29503431	+	Chr1:29501122-29506979W	PB.720.2/PB.720.4/PB.720.5,PB.720.1/PB.720.3
Chr1	Exon skipping	30166415	30166689	+	Chr1:30165979-30171652W	PB.743.2,PB.743.1
Chr1	Intron retention	30739612	30739736	+	Chr1:30738605-30740833W	PB.762.2,PB.762.1/PB.762.3/PB.762.4/PB.762.5
Chr1	Alternative 3' splice site	32027532	32027541	+	Chr1:32025962-32032634W	PB.822.1,PB.822.2
Chr1	Alternative 5' splice site	32700193	32700216	+	Chr1:32699041-32708569W	PB.849.1,PB.849.3
Chr1	Alternative 5' splice site	32705836	32705838	+	Chr1:32699041-32708569W	PB.849.1,PB.849.3
Chr1	Alternative 3' splice site	32897829	32897862	+	Chr1:32893373-32899739W	PB.855.1,PB.855.2
Chr1	Alternative 3' splice site	33902308	33902319	+	Chr1:33897329-33904362W	PB.899.2,PB.899.1
Chr1	Alternative 3' splice site	33920234	33920237	+	Chr1:33919387-33924649W	PB.900.1,PB.900.2
Chr1	Alternative 5' splice site	34937819	34937947	+	Chr1:34937757-34941955W	PB.945.2,PB.945.1
Chr1	Alternative 5' splice site	35736354	35736379	+	Chr1:35732664-35743680W	PB.979.1/PB.979.3,PB.979.2
Chr1	Alternative 3' splice site	35737130	35737140	+	Chr1:35732664-35743680W	PB.979.1/PB.979.3,PB.979.2
Chr1	Intron retention	36345138	36345264	+	Chr1:36343985-36346014W	PB.1011.2,PB.1011.3
Chr1	Intron retention	36356183	36356266	+	Chr1:36353105-36358626W	PB.1012.2,PB.1012.1
Chr1	Intron retention	36404704	36405357	+	Chr1:36403416-36407379W	PB.1016.2,PB.1016.1
Chr1	Alternative 5' splice site	36626089	36626105	+	Chr1:36622827-36627658W	PB.1021.1/PB.1021.3/PB.1021.5,PB.1021.4
Chr1	Alternative 3' splice site	36626207	36626233	+	Chr1:36622827-36627658W	PB.1021.1/PB.1021.3/PB.1021.5,PB.1021.2
Chr1	Exon skipping	37272543	37272747	+	Chr1:37270004-37274701W	PB.1048.7,PB.1048.1
Chr1	Intron retention	37520322	37520431	+	Chr1:37519501-37522464W	PB.1057.3,PB.1057.1/PB.1057.4/PB.1057.5
Chr1	Intron retention	37520497	37520902	+	Chr1:37519501-37522464W	PB.1057.2,PB.1057.1/PB.1057.4/PB.1057.5
Chr1	Exon skipping	37779283	37779676	+	Chr1:37774063-37782862W	PB.1073.4,PB.1073.8
Chr1	Alternative 3' splice site	37834479	37834501	+	Chr1:37834189-37836908W	PB.1075.2,PB.1075.1/PB.1075.3
Chr1	Alternative 3' splice site	38259038	38259047	+	Chr1:38257935-38261771W	PB.1093.1,PB.1093.2
Chr1	Intron retention	38509734	38510321	+	Chr1:38509120-38513478W	PB.1105.2,PB.1105.1
Chr1	Alternative 5' splice site	39090313	39090332	+	Chr1:39085081-39090925W	PB.1134.1/PB.1134.3,PB.1134.2/PB.1134.4
Chr1	Exon skipping	40128522	40128785	+	Chr1:40127415-40132365W	PB.1178.1,PB.1178.2
Chr1	Alternative 3' splice site	40130420	40130431	+	Chr1:40127415-40132365W	PB.1178.1/PB.1178.2,PB.1178.3
Chr1	Intron retention	40846339	40846427	+	Chr1:40842264-40848217W	PB.1212.2,PB.1212.1/PB.1212.3
Chr1	Alternative 5' splice site	40918046	40918085	+	Chr1:40915541-40920610W	PB.1216.1,PB.1216.2
Chr1	Intron retention	41440713	41441116	+	Chr1:41439295-41447115W	PB.1238.1,PB.1238.2
Chr1	Intron retention	41510217	41510306	+	Chr1:41510192-41519750W	PB.1239.2,PB.1239.4
Chr1	Alternative 5' splice site	41510450	41510477	+	Chr1:41510192-41519750W	PB.1239.2,PB.1239.3
Chr1	Intron retention	42230254	42230344	+	Chr1:42229521-42232672W	PB.1266.2,PB.1266.1/PB.1266.3/PB.1266.4
Chr1	Intron retention	42232633	42232644	+	Chr1:42229521-42232672W	PB.1266.3,PB.1266.1
Chr1	Alternative 5' splice site	42649412	42649433	+	Chr1:42646432-42653979W	PB.1290.2,PB.1290.1
Chr1	Intron retention	43017313	43017845	+	Chr1:43016981-43019128W	PB.1307.1,PB.1307.2
Chr1	Intron retention	577564	577482	-	Chr1:576493-579569C	PB.41.1,PB.41.2
Chr1	Alternative 5' splice site	2989130	2989120	-	Chr1:2986326-2989305C	PB.118.1/PB.118.2,PB.118.3
Chr1	Alternative 3' splice site	2988273	2988042	-	Chr1:2986326-2989305C	PB.118.2/PB.118.3,PB.118.1
Chr1	Intron retention	3334555	3334023	-	Chr1:3332963-3336031C	PB.129.1,PB.129.2
Chr1	Exon skipping	3483631	3483549	-	Chr1:3479358-3484586C	PB.137.1/PB.137.6,PB.137.3
Chr1	Exon skipping	3484382	3482888	-	Chr1:3479358-3484586C	PB.137.1/PB.137.6,PB.137.5
Chr1	Alternative 3' splice site	3714733	3714730	-	Chr1:3713740-3718631C	PB.146.3,PB.146.1
Chr1	Intron retention	3848113	3847737	-	Chr1:3846244-3850253C	PB.151.3,PB.151.1
Chr1	Intron retention	4330752	4330551	-	Chr1:4329393-4338487C	PB.164.2,PB.164.1
Chr1	Intron retention	4873370	4873236	-	Chr1:4872143-4873594C	PB.179.1,PB.179.2
Chr1	Alternative 3' splice site	4885334	4885331	-	Chr1:4879447-4885891C	PB.180.2,PB.180.1
Chr1	Alternative 3' splice site	4881971	4881968	-	Chr1:4879447-4885891C	PB.180.1,PB.180.2
Chr1	Exon skipping	7108065	7107973	-	Chr1:7104692-7109221C	PB.239.2,PB.239.1/PB.239.3
Chr1	Intron retention	8206883	8206755	-	Chr1:8203733-8206969C	PB.274.1/PB.274.4,PB.274.2
Chr1	Intron retention	8372958	8372864	-	Chr1:8367187-8375377C	PB.280.1,PB.280.2
Chr1	Alternative 5' splice site	8706051	8706025	-	Chr1:8701164-8708628C	PB.291.2,PB.291.1/PB.291.3
Chr1	Intron retention	9135965	9135600	-	Chr1:9133740-9140436C	PB.304.2,PB.304.1
Chr1	Alternative 3' splice site	9637869	9637864	-	Chr1:9631267-9638869C	PB.316.2,PB.316.3
Chr1	Exon skipping	9637869	9637832	-	Chr1:9631267-9638869C	PB.316.4,PB.316.2
Chr1	Alternative 3' splice site	9637203	9637180	-	Chr1:9631267-9638869C	PB.316.3,PB.316.2
Chr1	Alternative 5' splice site	12366195	12366158	-	Chr1:12363843-12366310C	PB.377.1/PB.377.4,PB.377.3
Chr1	Intron retention	13323378	13321850	-	Chr1:13319342-13323791C	PB.390.1,PB.390.2
Chr1	Alternative 5' splice site	17950552	17950544	-	Chr1:17947770-17951675C	PB.446.1/PB.446.2,PB.446.3
Chr1	Intron retention	17950184	17948953	-	Chr1:17947770-17951675C	PB.446.3,PB.446.1/PB.446.2
Chr1	Exon skipping	18027084	18027023	-	Chr1:18026558-18030353C	PB.451.1,PB.451.2
Chr1	Alternative 3' splice site	18398401	18398393	-	Chr1:18394338-18401668C	PB.456.1,PB.456.2
Chr1	Exon skipping	21703389	21703235	-	Chr1:21698952-21704186C	PB.500.3,PB.500.2
Chr1	Intron retention	22958838	22958330	-	Chr1:22954982-22959148C	PB.532.2,PB.532.1
Chr1	Intron retention	22958233	22956778	-	Chr1:22954982-22959148C	PB.532.3,PB.532.1
Chr1	Intron retention	22956507	22955755	-	Chr1:22954982-22959148C	PB.532.3,PB.532.1/PB.532.2
Chr1	Intron retention	23743614	23743510	-	Chr1:23740866-23744991C	PB.546.2,PB.546.1
Chr1	Intron retention	24247163	24247056	-	Chr1:24245918-24249361C	PB.560.1,PB.560.2
Chr1	Exon skipping	24637861	24637807	-	Chr1:24633734-24639245C	PB.575.2,PB.575.1
Chr1	Alternative 3' splice site	24767974	24767954	-	Chr1:24763097-24768257C	PB.578.2,PB.578.1
Chr1	Intron retention	24768089	24767954	-	Chr1:24763097-24768257C	PB.578.3,PB.578.1
Chr1	Alternative 3' splice site	25032469	25032466	-	Chr1:25029809-25033345C	PB.592.1,PB.592.2
Chr1	Intron retention	25154153	25153998	-	Chr1:25152104-25158379C	PB.594.1,PB.594.2
Chr1	Alternative 5' splice site	27092196	27092137	-	Chr1:27085754-27092239C	PB.636.2,PB.636.1
Chr1	Intron retention	27275196	27275023	-	Chr1:27274750-27278583C	PB.645.1,PB.645.2
Chr1	Intron retention	29208427	29208176	-	Chr1:29206362-29209638C	PB.705.1/PB.705.2,PB.705.3
Chr1	Exon skipping	29488742	29488644	-	Chr1:29483227-29492535C	PB.719.1,PB.719.2/PB.719.4
Chr1	Intron retention	29488161	29488101	-	Chr1:29483227-29492535C	PB.719.1/PB.719.2,PB.719.4
Chr1	Alternative 3' splice site	29484586	29484580	-	Chr1:29483227-29492535C	PB.719.1/PB.719.4,PB.719.2
Chr1	Alternative 5' splice site	29531352	29531291	-	Chr1:29529713-29532765C	PB.721.4,PB.721.1
Chr1	Alternative 3' splice site	29655269	29655260	-	Chr1:29652577-29656396C	PB.727.2,PB.727.1
Chr1	Intron retention	29846152	29844953	-	Chr1:29842777-29846824C	PB.732.5,PB.732.2
Chr1	Intron retention	29844555	29844048	-	Chr1:29842777-29846824C	PB.732.4/PB.732.5,PB.732.1/PB.732.2/PB.732.6
Chr1	Alternative 5' splice site	29969294	29969244	-	Chr1:29965254-29970767C	PB.736.8/PB.736.9,PB.736.5
Chr1	Intron retention	29970568	29968797	-	Chr1:29965254-29970767C	PB.736.12,PB.736.2
Chr1	Intron retention	29968834	29968743	-	Chr1:29965254-29970767C	PB.736.11/PB.736.3/PB.736.4/PB.736.5/PB.736.9,PB.736.8
Chr1	Intron retention	29969244	29969133	-	Chr1:29965254-29970767C	PB.736.1/PB.736.10/PB.736.13,PB.736.5
Chr1	Intron retention	29969294	29969133	-	Chr1:29965254-29970767C	PB.736.1/PB.736.10/PB.736.13,PB.736.9
Chr1	Intron retention	29969294	29968743	-	Chr1:29965254-29970767C	PB.736.1/PB.736.10/PB.736.13,PB.736.8
Chr1	Intron retention	29968571	29968477	-	Chr1:29965254-29970767C	PB.736.14/PB.736.6,PB.736.12
Chr1	Intron retention	29970568	29968477	-	Chr1:29965254-29970767C	PB.736.14/PB.736.6,PB.736.2
Chr1	Intron retention	29969294	29968477	-	Chr1:29965254-29970767C	PB.736.14/PB.736.6,PB.736.11/PB.736.4
Chr1	Intron retention	29965482	29965462	-	Chr1:29965254-29970767C	PB.736.4,PB.736.3
Chr1	Intron retention	31131059	31130928	-	Chr1:31120695-31132775C	PB.779.2,PB.779.1/PB.779.3
Chr1	Alternative 3' splice site	31129455	31129451	-	Chr1:31120695-31132775C	PB.779.1/PB.779.3,PB.779.2
Chr1	Alternative 3' splice site	32585143	32584940	-	Chr1:32580717-32586140C	PB.844.3,PB.844.1/PB.844.2
Chr1	Alternative 3' splice site	32588514	32588478	-	Chr1:32586925-32591942C	PB.845.2,PB.845.4
Chr1	Exon skipping	32763644	32763291	-	Chr1:32759124-32764681C	PB.851.2,PB.851.1
Chr1	Intron retention	34609083	34608959	-	Chr1:34605491-34611055C	PB.929.1,PB.929.2
Chr1	Exon skipping	34607723	34607509	-	Chr1:34605491-34611055C	PB.929.1,PB.929.2
Chr1	Alternative 5' splice site	34606399	34606395	-	Chr1:34605491-34611055C	PB.929.2,PB.929.1
Chr1	Intron retention	34642061	34641614	-	Chr1:34639748-34642697C	PB.931.3,PB.931.1
Chr1	Alternative 5' splice site	35706550	35706457	-	Chr1:35700437-35707871C	PB.977.1/PB.977.2,PB.977.4
Chr1	Intron retention	35706550	35706369	-	Chr1:35700437-35707871C	PB.977.6,PB.977.1/PB.977.2
Chr1	Intron retention	35706457	35706369	-	Chr1:35700437-35707871C	PB.977.6,PB.977.4
Chr1	Intron retention	35707792	35706369	-	Chr1:35700437-35707871C	PB.977.5,PB.977.1
Chr1	Intron retention	35707792	35706369	-	Chr1:35700437-35707871C	PB.977.5,PB.977.4
Chr1	Exon skipping	35819421	35819235	-	Chr1:35817508-35820865C	PB.984.1,PB.984.2
Chr1	Intron retention	35927446	35927363	-	Chr1:35925494-35929395C	PB.991.2,PB.991.1
Chr1	Alternative 3' splice site	37197278	37197214	-	Chr1:37190486-37197803C	PB.1045.1/PB.1045.3,PB.1045.2
Chr1	Alternative 3' splice site	38391077	38391031	-	Chr1:38386269-38391779C	PB.1101.1/PB.1101.2/PB.1101.5,PB.1101.4
Chr1	Alternative 3' splice site	38389880	38389869	-	Chr1:38386269-38391779C	PB.1101.1/PB.1101.2/PB.1101.3/PB.1101.4,PB.1101.5
Chr1	Alternative 3' splice site	38660307	38660297	-	Chr1:38659375-38663613C	PB.1113.2,PB.1113.1/PB.1113.3
Chr1	Intron retention	38659522	38659465	-	Chr1:38659375-38663613C	PB.1113.1,PB.1113.2
Chr1	Intron retention	38931789	38931706	-	Chr1:38930366-38934752C	PB.1121.2,PB.1121.1/PB.1121.3
Chr1	Intron retention	39359791	39359334	-	Chr1:39357403-39362783C	PB.1144.2,PB.1144.1/PB.1144.3
Chr1	Alternative 3' splice site	39472475	39472464	-	Chr1:39467622-39473839C	PB.1151.2,PB.1151.1
Chr1	Intron retention	39471870	39471292	-	Chr1:39467622-39473839C	PB.1151.2,PB.1151.1
Chr1	Alternative 3' splice site	40185082	40184974	-	Chr1:40182760-40190925C	PB.1181.2/PB.1181.3,PB.1181.1
Chr1	Intron retention	40636021	40635939	-	Chr1:40633098-40636145C	PB.1202.1,PB.1202.4
Chr1	Alternative 3' splice site	41071949	41071940	-	Chr1:41067032-41073392C	PB.1223.1,PB.1223.2/PB.1223.3
Chr1	Alternative 3' splice site	41577781	41577717	-	Chr1:41573956-41578801C	PB.1243.1,PB.1243.2
Chr1	Alternative 3' splice site	42338678	42338675	-	Chr1:42336274-42349399C	PB.1272.2,PB.1272.1
Chr10	Intron retention	1532995	1533119	+	Chr10:1532800-1536192W	PB.1347.2,PB.1347.3
Chr10	Alternative 5' splice site	2885830	2885945	+	Chr10:2885464-2886503W	PB.1362.2,PB.1362.1
Chr10	Exon skipping	8661822	8661876	+	Chr10:8660478-8678673W	PB.1416.2,PB.1416.1
Chr10	Intron retention	9258827	9258902	+	Chr10:9256259-9261354W	PB.1420.2,PB.1420.1
Chr10	Intron retention	10093055	10093324	+	Chr10:10089449-10095031W	PB.1428.2/PB.1428.5,PB.1428.1/PB.1428.3/PB.1428.4
Chr10	Intron retention	10935623	10935744	+	Chr10:10932176-10939192W	PB.1441.1,PB.1441.2
Chr10	Intron retention	13495208	13495318	+	Chr10:13492787-13496756W	PB.1475.1/PB.1475.2,PB.1475.3/PB.1475.4
Chr10	Intron retention	16235625	16235656	+	Chr10:16225415-16238843W	PB.1521.1/PB.1521.3,PB.1521.2
Chr10	Intron retention	17264839	17265177	+	Chr10:17262050-17266575W	PB.1541.3/PB.1541.4,PB.1541.1
Chr10	Intron retention	19094990	19095105	+	Chr10:19092666-19095669W	PB.1595.1,PB.1595.2
Chr10	Alternative 3' splice site	19622891	19622894	+	Chr10:19621692-19626217W	PB.1614.2/PB.1614.4/PB.1614.5,PB.1614.3
Chr10	Alternative 5' splice site	20298926	20298943	+	Chr10:20295353-20299471W	PB.1637.1,PB.1637.2
Chr10	Intron retention	22479907	22480003	+	Chr10:22478154-22482832W	PB.1708.3,PB.1708.1
Chr10	Intron retention	22479907	22480679	+	Chr10:22478154-22482832W	PB.1708.2,PB.1708.1
Chr10	Intron retention	22480170	22480679	+	Chr10:22478154-22482832W	PB.1708.2,PB.1708.3
Chr10	Alternative 5' splice site	46681	46572	-	Chr10:45943-58348C	PB.1320.1,PB.1320.2
Chr10	Alternative 5' splice site	1011169	1009700	-	Chr10:1007638-1012975C	PB.1341.2,PB.1341.1
Chr10	Intron retention	1009700	1009540	-	Chr10:1007638-1012975C	PB.1341.3/PB.1341.4,PB.1341.1
Chr10	Intron retention	1011169	1009540	-	Chr10:1007638-1012975C	PB.1341.3/PB.1341.4,PB.1341.2
Chr10	Intron retention	1008069	1007969	-	Chr10:1007638-1012975C	PB.1341.3,PB.1341.2
Chr10	Intron retention	4642093	4642016	-	Chr10:4639698-4644297C	PB.1383.2,PB.1383.1/PB.1383.3
Chr10	Alternative 3' splice site	6082331	6082328	-	Chr10:6080046-6087843C	PB.1395.3,PB.1395.2
Chr10	Alternative 3' splice site	11607305	11607292	-	Chr10:11605108-11609044C	PB.1449.2,PB.1449.3
Chr10	Intron retention	11607390	11607305	-	Chr10:11605108-11609044C	PB.1449.1,PB.1449.2
Chr10	Intron retention	11607390	11607292	-	Chr10:11605108-11609044C	PB.1449.1,PB.1449.3
Chr10	Exon skipping	14748032	14747940	-	Chr10:14746102-14750093C	PB.1500.1/PB.1500.2,PB.1500.3
Chr10	Intron retention	14746977	14746475	-	Chr10:14746102-14750093C	PB.1500.2,PB.1500.1
Chr10	Alternative 5' splice site	14871214	14871210	-	Chr10:14869805-14872480C	PB.1503.2,PB.1503.1
Chr10	Alternative 5' splice site	17205137	17205114	-	Chr10:17203558-17210636C	PB.1539.1,PB.1539.2
Chr10	Alternative 5' splice site	17453638	17453560	-	Chr10:17448952-17454772C	PB.1546.1,PB.1546.2/PB.1546.3
Chr10	Alternative 3' splice site	18840719	18840715	-	Chr10:18837746-18843192C	PB.1585.1,PB.1585.2
Chr10	Intron retention	20030871	20029347	-	Chr10:20028683-20031215C	PB.1625.3,PB.1625.1
Chr10	Intron retention	21111465	21111362	-	Chr10:21109411-21114447C	PB.1666.2,PB.1666.1/PB.1666.3
Chr10	Intron retention	21459723	21459652	-	Chr10:21454009-21459770C	PB.1678.2,PB.1678.1
Chr10	Alternative 3' splice site	21458589	21458549	-	Chr10:21454009-21459770C	PB.1678.1,PB.1678.2
Chr10	Intron retention	21471710	21471588	-	Chr10:21467611-21472190C	PB.1679.3,PB.1679.1
Chr10	Intron retention	21848985	21848925	-	Chr10:21847728-21849725C	PB.1689.1/PB.1689.3,PB.1689.2
Chr10	Intron retention	22470488	22470370	-	Chr10:22468995-22472718C	PB.1707.2,PB.1707.1
Chr10	Intron retention	22838478	22837725	-	Chr10:22836683-22840706C	PB.1723.2,PB.1723.1
Chr10	Alternative 3' splice site	23036588	23036368	-	Chr10:23035345-23039686C	PB.1734.1,PB.1734.2/PB.1734.4/PB.1734.5
Chr10	Intron retention	23036657	23036588	-	Chr10:23035345-23039686C	PB.1734.3,PB.1734.1
Chr10	Intron retention	23036657	23036368	-	Chr10:23035345-23039686C	PB.1734.3,PB.1734.2/PB.1734.4/PB.1734.5
Chr11	Alternative 3' splice site	596609	596629	+	Chr11:595387-600869W	PB.1777.3,PB.1777.2
Chr11	Intron retention	596707	596882	+	Chr11:595387-600869W	PB.1777.1,PB.1777.3
Chr11	Intron retention	723121	723345	+	Chr11:722980-724558W	PB.1788.1/PB.1788.2/PB.1788.3,PB.1788.4
Chr11	Alternative 3' splice site	852465	852478	+	Chr11:851565-855103W	PB.1793.1,PB.1793.3
Chr11	Alternative 5' splice site	1607109	1607146	+	Chr11:1603701-1609148W	PB.1817.1,PB.1817.2
Chr11	Intron retention	2565760	2566020	+	Chr11:2565153-2568500W	PB.1850.2,PB.1850.1
Chr11	Intron retention	2734851	2734933	+	Chr11:2730071-2736645W	PB.1852.2,PB.1852.1/PB.1852.3/PB.1852.5
Chr11	Intron retention	2735084	2735585	+	Chr11:2730071-2736645W	PB.1852.7,PB.1852.2
Chr11	Intron retention	2734851	2735585	+	Chr11:2730071-2736645W	PB.1852.7,PB.1852.1
Chr11	Intron retention	4088017	4088528	+	Chr11:4086112-4090667W	PB.1883.3,PB.1883.2
Chr11	Intron retention	4088017	4088679	+	Chr11:4086112-4090667W	PB.1883.1,PB.1883.2
Chr11	Intron retention	4088577	4088679	+	Chr11:4086112-4090667W	PB.1883.1,PB.1883.3
Chr11	Exon skipping	5351278	5351449	+	Chr11:5349221-5354863W	PB.1907.1,PB.1907.3
Chr11	Alternative 3' splice site	7661086	7661110	+	Chr11:7659705-7662289W	PB.1937.4,PB.1937.2/PB.1937.3/PB.1937.5
Chr11	Intron retention	7960711	7961604	+	Chr11:7960519-7963397W	PB.1942.4,PB.1942.1/PB.1942.2/PB.1942.3
Chr11	Intron retention	7961838	7961925	+	Chr11:7960519-7963397W	PB.1942.6,PB.1942.1/PB.1942.3/PB.1942.5
Chr11	Exon skipping	20070141	20071165	+	Chr11:20063523-20074588W	PB.2040.2,PB.2040.1
Chr11	Intron retention	21477763	21478192	+	Chr11:21475634-21479661W	PB.2059.1,PB.2059.2/PB.2059.3
Chr11	Alternative 3' splice site	21906902	21906905	+	Chr11:21906368-21909109W	PB.2066.2,PB.2066.3
Chr11	Alternative 3' splice site	22329870	22329873	+	Chr11:22328952-22334068W	PB.2073.2,PB.2073.1/PB.2073.3
Chr11	Alternative 3' splice site	22333552	22333565	+	Chr11:22328952-22334068W	PB.2073.1,PB.2073.3
Chr11	Intron retention	22333461	22333552	+	Chr11:22328952-22334068W	PB.2073.2,PB.2073.1
Chr11	Intron retention	22333461	22333565	+	Chr11:22328952-22334068W	PB.2073.2,PB.2073.3
Chr11	Alternative 3' splice site	22631204	22631213	+	Chr11:22630932-22637797W	PB.2079.1/PB.2079.3,PB.2079.2
Chr11	Intron retention	22637334	22637393	+	Chr11:22630932-22637797W	PB.2079.1,PB.2079.3
Chr11	Intron retention	23292109	23293546	+	Chr11:23291054-23294456W	PB.2088.1,PB.2088.2
Chr11	Alternative 3' splice site	26301491	26301509	+	Chr11:26300084-26305719W	PB.2129.1,PB.2129.2
Chr11	Alternative 3' splice site	27593867	27594187	+	Chr11:27590946-27596213W	PB.2139.1,PB.2139.3
Chr11	Intron retention	27830867	27830925	+	Chr11:27828654-27835246W	PB.2142.1,PB.2142.2
Chr11	Alternative 3' splice site	28498848	28498855	+	Chr11:28496667-28499950W	PB.2147.2,PB.2147.1
Chr11	Intron retention	401584	401462	-	Chr11:397421-401915C	PB.1765.4,PB.1765.3
Chr11	Alternative 5' splice site	401216	401202	-	Chr11:397421-401915C	PB.1765.2,PB.1765.1/PB.1765.3/PB.1765.4
Chr11	Intron retention	2022014	2021849	-	Chr11:2019792-2024220C	PB.1828.1,PB.1828.2
Chr11	Intron retention	2240605	2240455	-	Chr11:2239286-2243460C	PB.1836.2,PB.1836.1
Chr11	Intron retention	2259301	2259226	-	Chr11:2257202-2261382C	PB.1838.1,PB.1838.2
Chr11	Alternative 5' splice site	2258613	2258609	-	Chr11:2257202-2261382C	PB.1838.1,PB.1838.2
Chr11	Alternative 5' splice site	3384606	3384584	-	Chr11:3382386-3388871C	PB.1869.1/PB.1869.5/PB.1869.7/PB.1869.8,PB.1869.3
Chr11	Intron retention	3383682	3383574	-	Chr11:3382386-3388871C	PB.1869.3,PB.1869.1/PB.1869.5/PB.1869.7/PB.1869.8
Chr11	Intron retention	3490182	3490077	-	Chr11:3488554-3491604C	PB.1873.3,PB.1873.1/PB.1873.2/PB.1873.5
Chr11	Intron retention	3489987	3489885	-	Chr11:3488554-3491604C	PB.1873.4,PB.1873.1/PB.1873.2/PB.1873.5
Chr11	Intron retention	4971508	4971475	-	Chr11:4971318-4975043C	PB.1901.1,PB.1901.2
Chr11	Intron retention	5326764	5326695	-	Chr11:5324639-5327659C	PB.1906.1/PB.1906.2,PB.1906.3
Chr11	Intron retention	5325763	5325662	-	Chr11:5324639-5327659C	PB.1906.4,PB.1906.1/PB.1906.2
Chr11	Intron retention	5326764	5325662	-	Chr11:5324639-5327659C	PB.1906.4,PB.1906.3
Chr11	Alternative 3' splice site	7586341	7586318	-	Chr11:7584401-7588362C	PB.1934.1/PB.1934.4,PB.1934.2
Chr11	Alternative 3' splice site	7586341	7586266	-	Chr11:7584401-7588362C	PB.1934.1/PB.1934.4,PB.1934.5
Chr11	Alternative 3' splice site	7586318	7586266	-	Chr11:7584401-7588362C	PB.1934.2,PB.1934.5
Chr11	Intron retention	7586429	7586341	-	Chr11:7584401-7588362C	PB.1934.3,PB.1934.1/PB.1934.4
Chr11	Intron retention	7586429	7586318	-	Chr11:7584401-7588362C	PB.1934.3,PB.1934.2
Chr11	Intron retention	7586429	7586266	-	Chr11:7584401-7588362C	PB.1934.3,PB.1934.5
Chr11	Alternative 3' splice site	8201189	8201172	-	Chr11:8198274-8201958C	PB.1945.1/PB.1945.3,PB.1945.4
Chr11	Intron retention	8201343	8201189	-	Chr11:8198274-8201958C	PB.1945.2,PB.1945.1/PB.1945.3
Chr11	Intron retention	8201343	8201172	-	Chr11:8198274-8201958C	PB.1945.2,PB.1945.4
Chr11	Intron retention	20046684	20046267	-	Chr11:20045013-20048979C	PB.2039.2,PB.2039.1
Chr11	Intron retention	21482188	21482086	-	Chr11:21480186-21485092C	PB.2060.2,PB.2060.1
Chr11	Intron retention	22270104	22269571	-	Chr11:22267477-22271477C	PB.2071.2/PB.2071.3,PB.2071.1
Chr11	Alternative 3' splice site	22268831	22268817	-	Chr11:22267477-22271477C	PB.2071.1/PB.2071.3,PB.2071.2
Chr11	Intron retention	26472036	26471932	-	Chr11:26468418-26473251C	PB.2131.3,PB.2131.1
Chr11	Intron retention	26491454	26491441	-	Chr11:26488397-26492386C	PB.2132.1,PB.2132.2
Chr11	Intron retention	26560373	26560279	-	Chr11:26552945-26563320C	PB.2136.1,PB.2136.2
Chr11	Intron retention	28336290	28336197	-	Chr11:28335196-28338717C	PB.2144.2,PB.2144.1
Chr11	Intron retention	28934441	28934334	-	Chr11:28932862-28936036C	PB.2152.1/PB.2152.10/PB.2152.12/PB.2152.13/PB.2152.2/PB.2152.3/PB.2152.5/PB.2152.7/PB.2152.8/PB.2152.9,PB.2152.11
Chr11	Alternative 3' splice site	28934117	28933953	-	Chr11:28932862-28936036C	PB.2152.7,PB.2152.1/PB.2152.11/PB.2152.3/PB.2152.8
Chr11	Alternative 5' splice site	28933872	28933869	-	Chr11:28932862-28936036C	PB.2152.12,PB.2152.1/PB.2152.11/PB.2152.3/PB.2152.8
Chr11	Exon skipping	28934117	28933869	-	Chr11:28932862-28936036C	PB.2152.2/PB.2152.5/PB.2152.9,PB.2152.7
Chr11	Mutually exclusive exon	28934117	28933872	-	Chr11:28932862-28936036C	PB.2152.7,PB.2152.12
Chr11	Exon skipping	28933953	28933869	-	Chr11:28932862-28936036C	PB.2152.2/PB.2152.5/PB.2152.9,PB.2152.1/PB.2152.11/PB.2152.3/PB.2152.8
Chr11	Exon skipping	28933953	28933872	-	Chr11:28932862-28936036C	PB.2152.2/PB.2152.5/PB.2152.9,PB.2152.12
Chr12	Intron retention	632864	633941	+	Chr12:632396-638032W	PB.2189.1,PB.2189.2
Chr12	Alternative 3' splice site	634274	634278	+	Chr12:632396-638032W	PB.2189.2,PB.2189.1
Chr12	Alternative 5' splice site	1157829	1157847	+	Chr12:1156740-1158469W	PB.2215.3,PB.2215.2
Chr12	Intron retention	1558318	1558604	+	Chr12:1554882-1560302W	PB.2229.2,PB.2229.1
Chr12	Alternative 5' splice site	1803828	1803838	+	Chr12:1802706-1807517W	PB.2236.2/PB.2236.4,PB.2236.1/PB.2236.3
Chr12	Alternative 3' splice site	1804329	1804349	+	Chr12:1802706-1807517W	PB.2236.1/PB.2236.3/PB.2236.4,PB.2236.2
Chr12	Intron retention	1805754	1805851	+	Chr12:1802706-1807517W	PB.2236.4,PB.2236.2
Chr12	Alternative 5' splice site	1805915	1805919	+	Chr12:1802706-1807517W	PB.2236.2,PB.2236.3
Chr12	Alternative 5' splice site	1805915	1805919	+	Chr12:1802706-1807517W	PB.2236.4,PB.2236.1
Chr12	Exon skipping	2178354	2179326	+	Chr12:2176893-2182027W	PB.2249.1,PB.2249.2/PB.2249.3
Chr12	Intron retention	2781162	2781774	+	Chr12:2780536-2783714W	PB.2266.2,PB.2266.1
Chr12	Alternative 3' splice site	4209279	4209346	+	Chr12:4209111-4213044W	PB.2310.1,PB.2310.2
Chr12	Alternative 3' splice site	4211371	4211376	+	Chr12:4209111-4213044W	PB.2310.2,PB.2310.1
Chr12	Intron retention	4501309	4501426	+	Chr12:4499736-4503994W	PB.2315.1,PB.2315.2/PB.2315.3
Chr12	Intron retention	6916511	6917022	+	Chr12:6916189-6918532W	PB.2338.1,PB.2338.2/PB.2338.3
Chr12	Intron retention	9361028	9361824	+	Chr12:9350855-9365573W	PB.2365.7,PB.2365.2/PB.2365.3/PB.2365.4/PB.2365.5/PB.2365.6
Chr12	Intron retention	10772573	10772647	+	Chr12:10771028-10775425W	PB.2384.5,PB.2384.4
Chr12	Intron retention	10772573	10772647	+	Chr12:10771028-10775425W	PB.2384.3/PB.2384.6,PB.2384.1
Chr12	Intron retention	11352481	11352839	+	Chr12:11349771-11357207W	PB.2394.2,PB.2394.1
Chr12	Intron retention	13105341	13105434	+	Chr12:13103612-13106294W	PB.2407.2,PB.2407.1
Chr12	Alternative 3' splice site	17959718	17959731	+	Chr12:17955773-17964343W	PB.2441.1/PB.2441.3,PB.2441.2
Chr12	Intron retention	19427068	19427886	+	Chr12:19424839-19428488W	PB.2453.2,PB.2453.1
Chr12	Exon skipping	20849154	20849239	+	Chr12:20846953-20851966W	PB.2474.2,PB.2474.1
Chr12	Intron retention	22631890	22631991	+	Chr12:22628913-22632962W	PB.2506.1,PB.2506.2
Chr12	Intron retention	23249032	23249110	+	Chr12:23248827-23253343W	PB.2527.1/PB.2527.2,PB.2527.3
Chr12	Intron retention	23250796	23250948	+	Chr12:23248827-23253343W	PB.2527.2,PB.2527.1/PB.2527.3
Chr12	Alternative 3' splice site	23598263	23598266	+	Chr12:23596187-23600226W	PB.2540.1,PB.2540.2
Chr12	Exon skipping	23599562	23599600	+	Chr12:23596187-23600226W	PB.2540.2,PB.2540.1
Chr12	Alternative 3' splice site	26531979	26531991	+	Chr12:26530280-26535997W	PB.2611.1,PB.2611.2
Chr12	Intron retention	26650129	26650198	+	Chr12:26645021-26662990W	PB.2615.2,PB.2615.1/PB.2615.3/PB.2615.5/PB.2615.6
Chr12	Alternative 3' splice site	890082	890062	-	Chr12:885037-890850C	PB.2202.1/PB.2202.2,PB.2202.3
Chr12	Alternative 5' splice site	889285	889280	-	Chr12:885037-890850C	PB.2202.1,PB.2202.2/PB.2202.3
Chr12	Intron retention	927315	927221	-	Chr12:921738-927897C	PB.2206.1/PB.2206.4/PB.2206.7/PB.2206.9,PB.2206.8
Chr12	Intron retention	927227	927142	-	Chr12:921738-927897C	PB.2206.1/PB.2206.4/PB.2206.7/PB.2206.9,PB.2206.6
Chr12	Intron retention	926839	926731	-	Chr12:921738-927897C	PB.2206.3,PB.2206.6
Chr12	Intron retention	926839	926731	-	Chr12:921738-927897C	PB.2206.2/PB.2206.5,PB.2206.1/PB.2206.4/PB.2206.7/PB.2206.9
Chr12	Intron retention	927315	926731	-	Chr12:921738-927897C	PB.2206.2/PB.2206.5,PB.2206.8
Chr12	Intron retention	927227	926731	-	Chr12:921738-927897C	PB.2206.2/PB.2206.5,PB.2206.6
Chr12	Intron retention	927227	927142	-	Chr12:921738-927897C	PB.2206.2/PB.2206.5,PB.2206.3
Chr12	Intron retention	1095203	1094963	-	Chr12:1093762-1096579C	PB.2212.1,PB.2212.2
Chr12	Alternative 3' splice site	1223308	1223193	-	Chr12:1220943-1225065C	PB.2221.2,PB.2221.1
Chr12	Intron retention	1221962	1221876	-	Chr12:1220943-1225065C	PB.2221.1,PB.2221.2
Chr12	Alternative 3' splice site	1300703	1300691	-	Chr12:1292669-1300921C	PB.2224.1/PB.2224.3,PB.2224.2
Chr12	Intron retention	2020757	2020174	-	Chr12:2017486-2022865C	PB.2243.2,PB.2243.1
Chr12	Exon skipping	4635845	4635749	-	Chr12:4635104-4638407C	PB.2319.1,PB.2319.2
Chr12	Intron retention	5049175	5049037	-	Chr12:5045232-5050460C	PB.2329.2,PB.2329.1/PB.2329.3
Chr12	Alternative 3' splice site	7099516	7099493	-	Chr12:7095800-7101614C	PB.2342.4,PB.2342.1/PB.2342.3
Chr12	Alternative 3' splice site	10442568	10442565	-	Chr12:10436111-10443974C	PB.2383.2,PB.2383.1
Chr12	Alternative 3' splice site	10440872	10440863	-	Chr12:10436111-10443974C	PB.2383.2,PB.2383.1
Chr12	Alternative 3' splice site	14904150	14904144	-	Chr12:14897151-14904536C	PB.2424.2,PB.2424.1
Chr12	Intron retention	16198301	16198180	-	Chr12:16196138-16199528C	PB.2430.2,PB.2430.1/PB.2430.4/PB.2430.5
Chr12	Exon skipping	16197919	16197378	-	Chr12:16196138-16199528C	PB.2430.2/PB.2430.4,PB.2430.1/PB.2430.5
Chr12	Intron retention	16196768	16196672	-	Chr12:16196138-16199528C	PB.2430.5,PB.2430.1
Chr12	Intron retention	16197096	16196672	-	Chr12:16196138-16199528C	PB.2430.2/PB.2430.4,PB.2430.1
Chr12	Intron retention	16197096	16196865	-	Chr12:16196138-16199528C	PB.2430.2/PB.2430.4,PB.2430.5
Chr12	Intron retention	16198301	16197252	-	Chr12:16196138-16199528C	PB.2430.3,PB.2430.4
Chr12	Intron retention	16198027	16197252	-	Chr12:16196138-16199528C	PB.2430.3,PB.2430.2
Chr12	Intron retention	16198301	16196672	-	Chr12:16196138-16199528C	PB.2430.3,PB.2430.1
Chr12	Intron retention	16198301	16196865	-	Chr12:16196138-16199528C	PB.2430.3,PB.2430.5
Chr12	Alternative 3' splice site	19165001	19164623	-	Chr12:19161739-19165302C	PB.2450.3,PB.2450.1
Chr12	Alternative 5' splice site	21496380	21496378	-	Chr12:21493873-21500851C	PB.2489.3,PB.2489.2
Chr12	Alternative 3' splice site	23807535	23807528	-	Chr12:23805101-23808758C	PB.2547.1/PB.2547.3/PB.2547.4,PB.2547.2
Chr12	Intron retention	23806376	23806308	-	Chr12:23805101-23808758C	PB.2547.4,PB.2547.1/PB.2547.2/PB.2547.3
Chr12	Intron retention	27157771	27157436	-	Chr12:27154591-27160358C	PB.2627.3,PB.2627.1/PB.2627.2
Chr12	Alternative 3' splice site	27503468	27503308	-	Chr12:27495761-27508492C	PB.2645.2,PB.2645.1/PB.2645.3
Chr2	Intron retention	63919	63986	+	Chr2:59323-64708W	PB.2654.1,PB.2654.2
Chr2	Intron retention	343210	343496	+	Chr2:343057-346889W	PB.2672.1/PB.2672.2,PB.2672.3
Chr2	Intron retention	963732	963970	+	Chr2:961503-1005755W	PB.2693.1,PB.2693.2/PB.2693.3
Chr2	Intron retention	1328431	1329393	+	Chr2:1326922-1330305W	PB.2715.2,PB.2715.1
Chr2	Alternative 3' splice site	1393814	1393820	+	Chr2:1387902-1394276W	PB.2718.1,PB.2718.3
Chr2	Exon skipping	1971378	1971470	+	Chr2:1967721-1972779W	PB.2740.1,PB.2740.2
Chr2	Alternative 5' splice site	2107898	2107931	+	Chr2:2064263-2556278W	PB.2745.6,PB.2745.4/PB.2745.9
Chr2	Intron retention	2107931	2108367	+	Chr2:2064263-2556278W	PB.2745.7,PB.2745.4/PB.2745.9
Chr2	Intron retention	2107898	2108367	+	Chr2:2064263-2556278W	PB.2745.7,PB.2745.6
Chr2	Intron retention	3729195	3729295	+	Chr2:3727543-3731278W	PB.2800.4,PB.2800.2/PB.2800.5
Chr2	Intron retention	4131805	4132008	+	Chr2:4129151-4133821W	PB.2811.3,PB.2811.1/PB.2811.2
Chr2	Intron retention	4543419	4543527	+	Chr2:4542945-4544914W	PB.2828.1/PB.2828.3,PB.2828.2
Chr2	Alternative 3' splice site	5623871	5623887	+	Chr2:5623270-5627346W	PB.2867.1,PB.2867.2
Chr2	Exon skipping	7273531	7273727	+	Chr2:7273033-7278189W	PB.2905.1,PB.2905.2
Chr2	Alternative 3' splice site	7626797	7626901	+	Chr2:7621905-7627260W	PB.2911.1,PB.2911.2
Chr2	Exon skipping	8537109	8537124	+	Chr2:8536351-8538466W	PB.2924.2,PB.2924.1
Chr2	Alternative 3' splice site	10078465	10078503	+	Chr2:10074581-10081492W	PB.2951.1/PB.2951.3,PB.2951.4
Chr2	Intron retention	10078356	10078465	+	Chr2:10074581-10081492W	PB.2951.2/PB.2951.5,PB.2951.1/PB.2951.3
Chr2	Intron retention	10078356	10078503	+	Chr2:10074581-10081492W	PB.2951.2/PB.2951.5,PB.2951.4
Chr2	Intron retention	10377156	10377358	+	Chr2:10371075-10378143W	PB.2957.1,PB.2957.2
Chr2	Alternative 5' splice site	11964819	11964993	+	Chr2:11961721-11967965W	PB.2978.3,PB.2978.2
Chr2	Alternative 5' splice site	11964854	11964993	+	Chr2:11961721-11967965W	PB.2978.5,PB.2978.2
Chr2	Alternative 5' splice site	11964819	11964854	+	Chr2:11961721-11967965W	PB.2978.3,PB.2978.5
Chr2	Intron retention	11964993	11965476	+	Chr2:11961721-11967965W	PB.2978.4,PB.2978.2
Chr2	Intron retention	11964819	11965476	+	Chr2:11961721-11967965W	PB.2978.4,PB.2978.3
Chr2	Intron retention	11964854	11965476	+	Chr2:11961721-11967965W	PB.2978.4,PB.2978.5
Chr2	Intron retention	12611591	12612839	+	Chr2:12382735-12613277W	PB.2986.5,PB.2986.1/PB.2986.4
Chr2	Alternative 5' splice site	18565618	18565622	+	Chr2:18564233-18568489W	PB.3070.3,PB.3070.1/PB.3070.2
Chr2	Intron retention	18565950	18566353	+	Chr2:18564233-18568489W	PB.3070.1/PB.3070.3,PB.3070.2
Chr2	Intron retention	19685958	19686076	+	Chr2:19682509-19687245W	PB.3099.1,PB.3099.2
Chr2	Intron retention	19753405	19753504	+	Chr2:19750119-19754999W	PB.3103.2,PB.3103.1
Chr2	Alternative 3' splice site	22335300	22335323	+	Chr2:22333280-22337640W	PB.3171.2/PB.3171.3,PB.3171.1
Chr2	Intron retention	22336201	22336863	+	Chr2:22333280-22337640W	PB.3171.2,PB.3171.1/PB.3171.3/PB.3171.4/PB.3171.5
Chr2	Alternative 3' splice site	22893519	22893579	+	Chr2:22892372-22897264W	PB.3188.2,PB.3188.1
Chr2	Intron retention	25694768	25695512	+	Chr2:25693888-25696535W	PB.3296.1,PB.3296.2
Chr2	Alternative 3' splice site	25735350	25735363	+	Chr2:25733001-25736660W	PB.3297.2,PB.3297.1/PB.3297.3
Chr2	Alternative 3' splice site	26519988	26519992	+	Chr2:26519317-26523386W	PB.3324.1/PB.3324.3,PB.3324.2
Chr2	Alternative 3' splice site	26520512	26520515	+	Chr2:26519317-26523386W	PB.3324.2,PB.3324.1/PB.3324.3
Chr2	Intron retention	26522278	26522401	+	Chr2:26519317-26523386W	PB.3324.2,PB.3324.1/PB.3324.3/PB.3324.4
Chr2	Intron retention	26930414	26931104	+	Chr2:26929775-26932339W	PB.3330.1,PB.3330.2
Chr2	Exon skipping	27801986	27802093	+	Chr2:27798093-27803724W	PB.3361.2,PB.3361.1
Chr2	Alternative 5' splice site	27881443	27881458	+	Chr2:27875993-27884004W	PB.3362.2,PB.3362.1
Chr2	Exon skipping	28215894	28216012	+	Chr2:28212146-28219016W	PB.3370.6/PB.3370.9,PB.3370.1/PB.3370.3/PB.3370.5/PB.3370.8
Chr2	Intron retention	28216012	28216133	+	Chr2:28212146-28219016W	PB.3370.2,PB.3370.1/PB.3370.3/PB.3370.5/PB.3370.8
Chr2	Alternative 3' splice site	28215894	28216133	+	Chr2:28212146-28219016W	PB.3370.2,PB.3370.6/PB.3370.9
Chr2	Alternative 5' splice site	28216246	28216251	+	Chr2:28212146-28219016W	PB.3370.2,PB.3370.4
Chr2	Mutually exclusive exon	28215894	28216246	+	Chr2:28212146-28219016W	PB.3370.4,PB.3370.6/PB.3370.9
Chr2	Intron retention	28215589	28216501	+	Chr2:28212146-28219016W	PB.3370.7,PB.3370.6/PB.3370.9
Chr2	Intron retention	28215589	28216501	+	Chr2:28212146-28219016W	PB.3370.7,PB.3370.1/PB.3370.3/PB.3370.5/PB.3370.8
Chr2	Intron retention	28215589	28216501	+	Chr2:28212146-28219016W	PB.3370.7,PB.3370.2
Chr2	Intron retention	28215589	28216501	+	Chr2:28212146-28219016W	PB.3370.7,PB.3370.4
Chr2	Intron retention	28533909	28534048	+	Chr2:28532904-28536985W	PB.3382.3,PB.3382.2
Chr2	Exon skipping	28673296	28673380	+	Chr2:28673002-28676879W	PB.3390.4,PB.3390.1/PB.3390.3
Chr2	Intron retention	28673210	28673748	+	Chr2:28673002-28676879W	PB.3390.2,PB.3390.1
Chr2	Intron retention	28770789	28770853	+	Chr2:28768767-28772074W	PB.3396.1,PB.3396.3
Chr2	Alternative 5' splice site	28804997	28805055	+	Chr2:28802906-28805796W	PB.3399.1,PB.3399.2/PB.3399.3
Chr2	Intron retention	28822509	28822597	+	Chr2:28820773-28826583W	PB.3401.1,PB.3401.2
Chr2	Exon skipping	29596264	29596300	+	Chr2:29594585-29598768W	PB.3430.1,PB.3430.2/PB.3430.3
Chr2	Alternative 3' splice site	29596849	29596852	+	Chr2:29594585-29598768W	PB.3430.1,PB.3430.2/PB.3430.3
Chr2	Exon skipping	30095947	30096033	+	Chr2:30094259-30099173W	PB.3459.2,PB.3459.3
Chr2	Intron retention	30096033	30096198	+	Chr2:30094259-30099173W	PB.3459.1,PB.3459.3
Chr2	Alternative 3' splice site	30095947	30096198	+	Chr2:30094259-30099173W	PB.3459.1,PB.3459.2
Chr2	Alternative 3' splice site	30097861	30097864	+	Chr2:30094259-30099173W	PB.3459.1/PB.3459.2,PB.3459.3
Chr2	Intron retention	30381436	30381885	+	Chr2:30381306-30383504W	PB.3471.1/PB.3471.2,PB.3471.3
Chr2	Alternative 3' splice site	30382052	30382060	+	Chr2:30381306-30383504W	PB.3471.3,PB.3471.1/PB.3471.2
Chr2	Intron retention	30418892	30418958	+	Chr2:30418453-30423120W	PB.3473.4,PB.3473.5
Chr2	Alternative 3' splice site	30419195	30419201	+	Chr2:30418453-30423120W	PB.3473.2/PB.3473.4/PB.3473.5,PB.3473.6
Chr2	Alternative 3' splice site	31291340	31291351	+	Chr2:31290661-31299005W	PB.3513.1,PB.3513.2
Chr2	Intron retention	31909356	31909553	+	Chr2:31908642-31911672W	PB.3542.5,PB.3542.2/PB.3542.3/PB.3542.6
Chr2	Alternative 5' splice site	32831626	32831653	+	Chr2:32827838-32832767W	PB.3582.1,PB.3582.3/PB.3582.4
Chr2	Alternative 3' splice site	32831814	32831817	+	Chr2:32827838-32832767W	PB.3582.2,PB.3582.1
Chr2	Intron retention	32960739	32960851	+	Chr2:32957391-32961278W	PB.3591.2,PB.3591.3
Chr2	Alternative 5' splice site	33596048	33596129	+	Chr2:33595708-33599469W	PB.3619.2,PB.3619.1
Chr2	Intron retention	34785457	34785819	+	Chr2:34784145-34792843W	PB.3681.2,PB.3681.1
Chr2	Alternative 3' splice site	35002983	35002997	+	Chr2:35002742-35004794W	PB.3695.2,PB.3695.1
Chr2	Intron retention	35760807	35760892	+	Chr2:35755021-35761205W	PB.3748.1,PB.3748.2
Chr2	Intron retention	5514	4917	-	Chr2:3625-8313C	PB.2649.2,PB.2649.1
Chr2	Intron retention	82300	82217	-	Chr2:79687-82878C	PB.2656.2,PB.2656.1/PB.2656.3/PB.2656.5
Chr2	Intron retention	82096	82004	-	Chr2:79687-82878C	PB.2656.4,PB.2656.1/PB.2656.3/PB.2656.5
Chr2	Intron retention	1199086	1198988	-	Chr2:1198101-1202335C	PB.2710.1,PB.2710.2
Chr2	Alternative 5' splice site	2077095	2077090	-	Chr2:2075622-2079168C	PB.2746.2,PB.2746.3
Chr2	Intron retention	3795303	3794816	-	Chr2:3792699-3796788C	PB.2802.2,PB.2802.1
Chr2	Alternative 5' splice site	4298962	4298957	-	Chr2:4293276-4299056C	PB.2817.4,PB.2817.3
Chr2	Intron retention	5245374	5245286	-	Chr2:5242711-5249384C	PB.2853.2,PB.2853.1/PB.2853.3
Chr2	Intron retention	5470066	5468753	-	Chr2:5468646-5470440C	PB.2862.2,PB.2862.3
Chr2	Exon skipping	5751295	5750766	-	Chr2:5750435-5753593C	PB.2872.2,PB.2872.1
Chr2	Alternative 5' splice site	5799377	5799349	-	Chr2:5798899-5806377C	PB.2873.1/PB.2873.2,PB.2873.3
Chr2	Exon skipping	6438213	6438158	-	Chr2:6433459-6441706C	PB.2886.1/PB.2886.3,PB.2886.2
Chr2	Intron retention	6511642	6510383	-	Chr2:6508908-6513827C	PB.2887.4,PB.2887.3
Chr2	Intron retention	7519175	7519150	-	Chr2:7516235-7519231C	PB.2908.1/PB.2908.2/PB.2908.3,PB.2908.4
Chr2	Intron retention	7518473	7518289	-	Chr2:7516235-7519231C	PB.2908.2,PB.2908.1/PB.2908.3/PB.2908.4
Chr2	Alternative 3' splice site	7632250	7632028	-	Chr2:7630853-7635197C	PB.2912.2,PB.2912.1
Chr2	Alternative 3' splice site	8556181	8555628	-	Chr2:8553858-8558167C	PB.2925.3,PB.2925.2
Chr2	Alternative 3' splice site	8556101	8555628	-	Chr2:8553858-8558167C	PB.2925.5,PB.2925.2
Chr2	Alternative 3' splice site	8556181	8556101	-	Chr2:8553858-8558167C	PB.2925.3,PB.2925.5
Chr2	Intron retention	8556600	8555628	-	Chr2:8553858-8558167C	PB.2925.1/PB.2925.4,PB.2925.2
Chr2	Intron retention	8556600	8556181	-	Chr2:8553858-8558167C	PB.2925.1/PB.2925.4,PB.2925.3
Chr2	Intron retention	8556600	8556101	-	Chr2:8553858-8558167C	PB.2925.1/PB.2925.4,PB.2925.5
Chr2	Intron retention	8555338	8555086	-	Chr2:8553858-8558167C	PB.2925.4,PB.2925.1/PB.2925.2/PB.2925.3/PB.2925.5
Chr2	Alternative 5' splice site	10187669	10187663	-	Chr2:10181431-10189241C	PB.2954.2,PB.2954.1
Chr2	Intron retention	10185140	10185127	-	Chr2:10181431-10189241C	PB.2954.1,PB.2954.2
Chr2	Intron retention	11883616	11883526	-	Chr2:11882289-11885838C	PB.2976.2,PB.2976.1
Chr2	Intron retention	13980520	13979783	-	Chr2:13977633-13987331C	PB.3011.3,PB.3011.1/PB.3011.2
Chr2	Intron retention	15642732	15642612	-	Chr2:15641263-15647376C	PB.3030.2,PB.3030.1/PB.3030.3/PB.3030.5
Chr2	Intron retention	15643138	15642612	-	Chr2:15641263-15647376C	PB.3030.4,PB.3030.1/PB.3030.3/PB.3030.5
Chr2	Intron retention	15643138	15642796	-	Chr2:15641263-15647376C	PB.3030.4,PB.3030.2
Chr2	Alternative 3' splice site	16344534	16344360	-	Chr2:16341693-16345632C	PB.3041.1,PB.3041.2
Chr2	Alternative 3' splice site	18829540	18829527	-	Chr2:18827027-18831752C	PB.3075.1,PB.3075.2
Chr2	Intron retention	20925995	20925269	-	Chr2:20921450-20932783C	PB.3132.1,PB.3132.2/PB.3132.3
Chr2	Alternative 3' splice site	21121383	21121372	-	Chr2:21115912-21122133C	PB.3142.2,PB.3142.1/PB.3142.3
Chr2	Intron retention	23999867	23998705	-	Chr2:23998071-24000804C	PB.3231.2,PB.3231.1
Chr2	Intron retention	24530935	24530879	-	Chr2:24527365-24530961C	PB.3245.3,PB.3245.1
Chr2	Alternative 3' splice site	24530366	24530347	-	Chr2:24527365-24530961C	PB.3245.1,PB.3245.2/PB.3245.3
Chr2	Alternative 3' splice site	24529936	24529925	-	Chr2:24527365-24530961C	PB.3245.1,PB.3245.2/PB.3245.3
Chr2	Alternative 5' splice site	24529325	24529321	-	Chr2:24527365-24530961C	PB.3245.1,PB.3245.2/PB.3245.3
Chr2	Intron retention	24528693	24528604	-	Chr2:24527365-24530961C	PB.3245.1,PB.3245.2/PB.3245.3
Chr2	Intron retention	24528281	24528176	-	Chr2:24527365-24530961C	PB.3245.2,PB.3245.1/PB.3245.3
Chr2	Intron retention	24724069	24724045	-	Chr2:24718175-24724116C	PB.3254.1/PB.3254.4,PB.3254.2
Chr2	Intron retention	24785014	24784082	-	Chr2:24783200-24786480C	PB.3260.3,PB.3260.1
Chr2	Intron retention	24785312	24784082	-	Chr2:24783200-24786480C	PB.3260.2,PB.3260.1
Chr2	Intron retention	24785312	24785226	-	Chr2:24783200-24786480C	PB.3260.2,PB.3260.3
Chr2	Intron retention	24977181	24976943	-	Chr2:24973375-24977287C	PB.3266.1/PB.3266.4/PB.3266.5/PB.3266.6,PB.3266.2
Chr2	Intron retention	24989198	24988999	-	Chr2:24985245-25009121C	PB.3267.1/PB.3267.3/PB.3267.4,PB.3267.2
Chr2	Alternative 3' splice site	27209266	27209175	-	Chr2:27208214-27212638C	PB.3341.2,PB.3341.1
Chr2	Intron retention	28629504	28629420	-	Chr2:28625283-28631034C	PB.3387.1,PB.3387.2/PB.3387.3
Chr2	Alternative 3' splice site	28629640	28629221	-	Chr2:28625283-28631034C	PB.3387.1,PB.3387.4
Chr2	Alternative 3' splice site	28629000	28628991	-	Chr2:28625283-28631034C	PB.3387.3,PB.3387.1/PB.3387.2/PB.3387.4
Chr2	Exon skipping	28831348	28831277	-	Chr2:28826750-28833631C	PB.3402.1/PB.3402.3,PB.3402.2
Chr2	Mutually exclusive exon	28943722	28943497	-	Chr2:28939787-28948420C	PB.3407.1,PB.3407.2
Chr2	Intron retention	29084112	29083655	-	Chr2:29081884-29086675C	PB.3414.1,PB.3414.2
Chr2	Intron retention	29083590	29083242	-	Chr2:29081884-29086675C	PB.3414.3/PB.3414.4,PB.3414.1
Chr2	Intron retention	29084112	29083242	-	Chr2:29081884-29086675C	PB.3414.3/PB.3414.4,PB.3414.2
Chr2	Intron retention	29082517	29082409	-	Chr2:29081884-29086675C	PB.3414.3,PB.3414.1/PB.3414.2/PB.3414.4
Chr2	Intron retention	29741453	29741372	-	Chr2:29734946-29741713C	PB.3439.6,PB.3439.2
Chr2	Alternative 3' splice site	29739191	29739137	-	Chr2:29734946-29741713C	PB.3439.6,PB.3439.5
Chr2	Exon skipping	29739137	29739060	-	Chr2:29734946-29741713C	PB.3439.1/PB.3439.2/PB.3439.3,PB.3439.5
Chr2	Exon skipping	29739191	29739060	-	Chr2:29734946-29741713C	PB.3439.1/PB.3439.2/PB.3439.3,PB.3439.6
Chr2	Intron retention	29953837	29953723	-	Chr2:29950714-29956857C	PB.3456.1,PB.3456.2
Chr2	Alternative 5' splice site	30963384	30963372	-	Chr2:30958875-30965276C	PB.3498.1/PB.3498.2,PB.3498.3/PB.3498.4
Chr2	Intron retention	30963190	30963173	-	Chr2:30958875-30965276C	PB.3498.1/PB.3498.2/PB.3498.3,PB.3498.4
Chr2	Intron retention	30960381	30959350	-	Chr2:30958875-30965276C	PB.3498.1,PB.3498.2/PB.3498.3/PB.3498.4
Chr2	Alternative 5' splice site	31920224	31920215	-	Chr2:31916114-31920581C	PB.3543.3,PB.3543.2
Chr2	Alternative 5' splice site	31920227	31920215	-	Chr2:31916114-31920581C	PB.3543.4,PB.3543.2
Chr2	Alternative 5' splice site	31920227	31920224	-	Chr2:31916114-31920581C	PB.3543.4,PB.3543.3
Chr2	Alternative 3' splice site	33160543	33160506	-	Chr2:33159684-33168964C	PB.3600.1,PB.3600.2
Chr2	Intron retention	33173387	33173217	-	Chr2:33169951-33175621C	PB.3601.4/PB.3601.5,PB.3601.1/PB.3601.3
Chr2	Intron retention	33173007	33172212	-	Chr2:33169951-33175621C	PB.3601.5,PB.3601.1/PB.3601.3/PB.3601.4
Chr2	Intron retention	33514412	33514311	-	Chr2:33511960-33517881C	PB.3614.1,PB.3614.2/PB.3614.3
Chr2	Intron retention	33533510	33533360	-	Chr2:33530592-33535898C	PB.3615.1,PB.3615.2
Chr2	Intron retention	33532713	33532628	-	Chr2:33530592-33535898C	PB.3615.1,PB.3615.2
Chr2	Exon skipping	33696411	33696351	-	Chr2:33694701-33698562C	PB.3625.2,PB.3625.1
Chr2	Exon skipping	34116452	34116346	-	Chr2:34114287-34125892C	PB.3648.2,PB.3648.1
Chr2	Intron retention	34153120	34152969	-	Chr2:34144003-34155576C	PB.3649.1,PB.3649.2
Chr2	Exon skipping	34145951	34145883	-	Chr2:34144003-34155576C	PB.3649.2,PB.3649.1
Chr2	Alternative 3' splice site	34144952	34144890	-	Chr2:34144003-34155576C	PB.3649.2,PB.3649.1
Chr2	Alternative 3' splice site	34144362	34144278	-	Chr2:34144003-34155576C	PB.3649.1,PB.3649.2
Chr2	Alternative 3' splice site	34343443	34343424	-	Chr2:34336374-34344192C	PB.3663.2,PB.3663.1
Chr2	Intron retention	35183762	35183675	-	Chr2:35179147-35184131C	PB.3708.2,PB.3708.1
Chr2	Alternative 3' splice site	35211032	35211029	-	Chr2:35207707-35211425C	PB.3711.2,PB.3711.3
Chr2	Exon skipping	35313139	35313137	-	Chr2:35307394-35313609C	PB.3720.1,PB.3720.2
Chr2	Intron retention	35816197	35816125	-	Chr2:35812495-35818193C	PB.3754.2,PB.3754.1/PB.3754.3
Chr3	Alternative 3' splice site	321812	321832	+	Chr3:321593-323937W	PB.3782.2,PB.3782.1
Chr3	Intron retention	633868	633947	+	Chr3:632615-636373W	PB.3802.3,PB.3802.1/PB.3802.2
Chr3	Alternative 3' splice site	976655	976694	+	Chr3:974590-978413W	PB.3822.1,PB.3822.2
Chr3	Intron retention	1072121	1072519	+	Chr3:1061115-1075699W	PB.3830.2,PB.3830.1
Chr3	Intron retention	1073040	1073127	+	Chr3:1061115-1075699W	PB.3830.2,PB.3830.1
Chr3	Alternative 3' splice site	1476761	1476765	+	Chr3:1476337-1483323W	PB.3846.3,PB.3846.2
Chr3	Alternative 5' splice site	1625233	1625732	+	Chr3:1625098-1629531W	PB.3853.4,PB.3853.1/PB.3853.2/PB.3853.3
Chr3	Intron retention	1663637	1663752	+	Chr3:1662151-1665578W	PB.3856.2,PB.3856.1/PB.3856.3/PB.3856.4/PB.3856.5
Chr3	Intron retention	1664162	1664249	+	Chr3:1662151-1665578W	PB.3856.2,PB.3856.1/PB.3856.3/PB.3856.4/PB.3856.5
Chr3	Exon skipping	2056060	2056127	+	Chr3:2055419-2058999W	PB.3884.1/PB.3884.3,PB.3884.2
Chr3	Intron retention	2057339	2058353	+	Chr3:2055419-2058999W	PB.3884.3,PB.3884.2
Chr3	Alternative 3' splice site	3041045	3041048	+	Chr3:3039764-3045330W	PB.3927.2,PB.3927.1
Chr3	Alternative 5' splice site	3092829	3092834	+	Chr3:3091831-3095663W	PB.3930.1,PB.3930.2
Chr3	Intron retention	3093328	3093518	+	Chr3:3091831-3095663W	PB.3930.2,PB.3930.1
Chr3	Intron retention	3106982	3107100	+	Chr3:3103811-3109760W	PB.3931.1,PB.3931.2
Chr3	Intron retention	3765964	3766148	+	Chr3:3763773-3767128W	PB.3961.2,PB.3961.1
Chr3	Alternative 3' splice site	5971769	5972553	+	Chr3:5967154-5973704W	PB.4059.2,PB.4059.1
Chr3	Intron retention	6582691	6583263	+	Chr3:6581141-6587888W	PB.4097.2,PB.4097.1/PB.4097.3
Chr3	Intron retention	6703707	6703791	+	Chr3:6698270-6706335W	PB.4102.2,PB.4102.1
Chr3	Alternative 5' splice site	6754579	6754607	+	Chr3:6754275-6756874W	PB.4105.1/PB.4105.10/PB.4105.11/PB.4105.12/PB.4105.13/PB.4105.2/PB.4105.3/PB.4105.4/PB.4105.5/PB.4105.6/PB.4105.7/PB.4105.8/PB.4105.9,PB.4105.14
Chr3	Intron retention	6755233	6756046	+	Chr3:6754275-6756874W	PB.4105.1,PB.4105.9
Chr3	Intron retention	7480703	7481689	+	Chr3:7480379-7483338W	PB.4135.3/PB.4135.7,PB.4135.2
Chr3	Intron retention	7596059	7596348	+	Chr3:7591868-7597422W	PB.4142.2,PB.4142.1
Chr3	Intron retention	7599895	7600000	+	Chr3:7599692-7603000W	PB.4143.3,PB.4143.2
Chr3	Intron retention	8751109	8751430	+	Chr3:8749800-8752908W	PB.4190.2,PB.4190.1
Chr3	Intron retention	8822809	8822835	+	Chr3:8819177-8824307W	PB.4198.1/PB.4198.2,PB.4198.3
Chr3	Intron retention	9068461	9068780	+	Chr3:9068388-9073927W	PB.4217.1,PB.4217.2
Chr3	Intron retention	9220098	9221495	+	Chr3:9218773-9224115W	PB.4223.3,PB.4223.1/PB.4223.2
Chr3	Intron retention	9311592	9311691	+	Chr3:9307508-9312241W	PB.4226.2,PB.4226.1
Chr3	Intron retention	9843952	9845309	+	Chr3:9843328-9846738W	PB.4254.5,PB.4254.1/PB.4254.2/PB.4254.4
Chr3	Alternative 5' splice site	9987767	9987782	+	Chr3:9987209-9990362W	PB.4263.1,PB.4263.2
Chr3	Intron retention	10543191	10543446	+	Chr3:10542854-10546167W	PB.4291.1,PB.4291.2
Chr3	Intron retention	10619810	10620005	+	Chr3:10617773-10620954W	PB.4298.3,PB.4298.1/PB.4298.2
Chr3	Alternative 3' splice site	11238765	11238813	+	Chr3:11237728-11241459W	PB.4322.1,PB.4322.2
Chr3	Intron retention	13283304	13283977	+	Chr3:13283226-13284513W	PB.4405.1,PB.4405.3
Chr3	Alternative 5' splice site	13786552	13786573	+	Chr3:13776969-13788685W	PB.4413.2,PB.4413.1/PB.4413.3/PB.4413.4
Chr3	Intron retention	13786573	13787047	+	Chr3:13776969-13788685W	PB.4413.7,PB.4413.1/PB.4413.3/PB.4413.4
Chr3	Intron retention	13786552	13787047	+	Chr3:13776969-13788685W	PB.4413.7,PB.4413.2
Chr3	Intron retention	13786716	13786849	+	Chr3:13776969-13788685W	PB.4413.7,PB.4413.6
Chr3	Exon skipping	14880462	14880663	+	Chr3:14878797-14883622W	PB.4434.1,PB.4434.2
Chr3	Exon skipping	15468577	15468608	+	Chr3:15467831-15473836W	PB.4448.3/PB.4448.7,PB.4448.12/PB.4448.13/PB.4448.2/PB.4448.4/PB.4448.6/PB.4448.8
Chr3	Exon skipping	15471005	15471076	+	Chr3:15467831-15473836W	PB.4448.12/PB.4448.16/PB.4448.8,PB.4448.11/PB.4448.13/PB.4448.2/PB.4448.3/PB.4448.4/PB.4448.5/PB.4448.6/PB.4448.7/PB.4448.9
Chr3	Intron retention	15471646	15471740	+	Chr3:15467831-15473836W	PB.4448.11/PB.4448.12/PB.4448.16/PB.4448.2/PB.4448.3/PB.4448.4/PB.4448.5/PB.4448.6/PB.4448.8/PB.4448.9,PB.4448.13
Chr3	Exon skipping	15471740	15471796	+	Chr3:15467831-15473836W	PB.4448.7,PB.4448.13
Chr3	Alternative 5' splice site	15471646	15471796	+	Chr3:15467831-15473836W	PB.4448.7,PB.4448.11/PB.4448.12/PB.4448.16/PB.4448.2/PB.4448.3/PB.4448.4/PB.4448.6/PB.4448.8/PB.4448.9
Chr3	Alternative 3' splice site	15471901	15471906	+	Chr3:15467831-15473836W	PB.4448.11/PB.4448.12/PB.4448.13/PB.4448.16/PB.4448.2/PB.4448.3/PB.4448.4/PB.4448.6/PB.4448.8/PB.4448.9,PB.4448.5
Chr3	Intron retention	15472627	15473100	+	Chr3:15467831-15473836W	PB.4448.11/PB.4448.5/PB.4448.6/PB.4448.7/PB.4448.8,PB.4448.12/PB.4448.13/PB.4448.16/PB.4448.2/PB.4448.3/PB.4448.4/PB.4448.9
Chr3	Intron retention	16284706	16284776	+	Chr3:16282777-16290469W	PB.4470.1,PB.4470.2
Chr3	Alternative 3' splice site	16574120	16574147	+	Chr3:16571962-16577760W	PB.4479.2,PB.4479.1
Chr3	Alternative 3' splice site	16657923	16657932	+	Chr3:16654366-16658279W	PB.4482.3,PB.4482.2
Chr3	Alternative 3' splice site	17671735	17671738	+	Chr3:17669048-17674054W	PB.4497.2,PB.4497.1
Chr3	Intron retention	17676330	17676511	+	Chr3:17674228-17677998W	PB.4498.1,PB.4498.2
Chr3	Alternative 3' splice site	19528980	19528994	+	Chr3:19528077-19531689W	PB.4526.1,PB.4526.2
Chr3	Alternative 3' splice site	21675185	21675197	+	Chr3:21673705-21680366W	PB.4571.1/PB.4571.2,PB.4571.3
Chr3	Intron retention	22617708	22618529	+	Chr3:22616001-22619495W	PB.4593.2,PB.4593.1
Chr3	Exon skipping	23928339	23928497	+	Chr3:23925580-23934201W	PB.4614.1,PB.4614.2
Chr3	Intron retention	28107921	28108017	+	Chr3:28107165-28113294W	PB.4711.2,PB.4711.3
Chr3	Intron retention	28108045	28108155	+	Chr3:28107165-28113294W	PB.4711.2,PB.4711.4
Chr3	Alternative 3' splice site	28183448	28183475	+	Chr3:28179955-28186109W	PB.4717.2,PB.4717.1/PB.4717.3
Chr3	Intron retention	28851463	28851746	+	Chr3:28846797-28852583W	PB.4742.1,PB.4742.2
Chr3	Intron retention	29206924	29207074	+	Chr3:29200336-29208649W	PB.4755.3,PB.4755.1
Chr3	Alternative 3' splice site	29207459	29207466	+	Chr3:29200336-29208649W	PB.4755.1,PB.4755.3
Chr3	Intron retention	29527516	29527603	+	Chr3:29526118-29528984W	PB.4768.3,PB.4768.4/PB.4768.5
Chr3	Intron retention	30804990	30806541	+	Chr3:30803335-30807416W	PB.4816.2,PB.4816.1
Chr3	Intron retention	30825847	30826824	+	Chr3:30825183-30829268W	PB.4818.2,PB.4818.1
Chr3	Intron retention	30854525	30854736	+	Chr3:30851693-30857323W	PB.4819.5,PB.4819.2/PB.4819.3/PB.4819.4/PB.4819.6/PB.4819.7
Chr3	Intron retention	30887437	30887606	+	Chr3:30883130-30887972W	PB.4820.2,PB.4820.4
Chr3	Intron retention	32371994	32372109	+	Chr3:32371758-32374786W	PB.4896.1/PB.4896.2,PB.4896.3
Chr3	Alternative 3' splice site	34418600	34418624	+	Chr3:34412853-34419141W	PB.5012.1,PB.5012.2
Chr3	Intron retention	34797711	34797734	+	Chr3:34797440-34800850W	PB.5041.2,PB.5041.4
Chr3	Intron retention	34797771	34799106	+	Chr3:34797440-34800850W	PB.5041.3,PB.5041.2
Chr3	Intron retention	34797711	34799106	+	Chr3:34797440-34800850W	PB.5041.3,PB.5041.4
Chr3	Alternative 3' splice site	35037876	35037888	+	Chr3:35037615-35041625W	PB.5053.3,PB.5053.1/PB.5053.2
Chr3	Intron retention	35424903	35424986	+	Chr3:35424440-35427965W	PB.5072.1,PB.5072.2
Chr3	Exon skipping	35595068	35595201	+	Chr3:35589808-35595925W	PB.5082.1,PB.5082.2
Chr3	Intron retention	35595201	35595333	+	Chr3:35589808-35595925W	PB.5082.3,PB.5082.2
Chr3	Alternative 3' splice site	35595068	35595333	+	Chr3:35589808-35595925W	PB.5082.3,PB.5082.1
Chr3	Alternative 3' splice site	36127346	36127349	+	Chr3:36124385-36131992W	PB.5113.3,PB.5113.1/PB.5113.2
Chr3	Intron retention	36382528	36382604	+	Chr3:36381740-36384489W	PB.5129.2,PB.5129.1
Chr3	Intron retention	132447	132214	-	Chr3:125320-132786C	PB.3774.2,PB.3774.1
Chr3	Alternative 3' splice site	297659	297648	-	Chr3:295436-297898C	PB.3781.1,PB.3781.2
Chr3	Intron retention	474942	474475	-	Chr3:471451-476768C	PB.3790.2,PB.3790.1
Chr3	Intron retention	1349151	1348033	-	Chr3:1346050-1349533C	PB.3840.2,PB.3840.1
Chr3	Alternative 5' splice site	1500407	1500403	-	Chr3:1499630-1504274C	PB.3848.1,PB.3848.3
Chr3	Alternative 5' splice site	2654420	2654368	-	Chr3:2651951-2661709C	PB.3911.22/PB.3911.7,PB.3911.15
Chr3	Alternative 5' splice site	2654405	2654368	-	Chr3:2651951-2661709C	PB.3911.13/PB.3911.21,PB.3911.15
Chr3	Alternative 5' splice site	2654446	2654368	-	Chr3:2651951-2661709C	PB.3911.6,PB.3911.15
Chr3	Alternative 5' splice site	2654420	2654405	-	Chr3:2651951-2661709C	PB.3911.22/PB.3911.7,PB.3911.13/PB.3911.21
Chr3	Alternative 5' splice site	2654446	2654420	-	Chr3:2651951-2661709C	PB.3911.6,PB.3911.22/PB.3911.7
Chr3	Alternative 5' splice site	2654446	2654405	-	Chr3:2651951-2661709C	PB.3911.6,PB.3911.13/PB.3911.21
Chr3	Alternative 3' splice site	2654271	2654256	-	Chr3:2651951-2661709C	PB.3911.13/PB.3911.21,PB.3911.12
Chr3	Alternative 3' splice site	2654271	2654256	-	Chr3:2651951-2661709C	PB.3911.6,PB.3911.8
Chr3	Intron retention	2654416	2654271	-	Chr3:2651951-2661709C	PB.3911.14/PB.3911.20/PB.3911.4,PB.3911.18
Chr3	Intron retention	2654318	2654302	-	Chr3:2651951-2661709C	PB.3911.14/PB.3911.20/PB.3911.4,PB.3911.16/PB.3911.2/PB.3911.9
Chr3	Intron retention	2654368	2654271	-	Chr3:2651951-2661709C	PB.3911.1/PB.3911.10/PB.3911.11,PB.3911.15
Chr3	Intron retention	2654420	2654271	-	Chr3:2651951-2661709C	PB.3911.1/PB.3911.10/PB.3911.11,PB.3911.22/PB.3911.7
Chr3	Intron retention	2654795	2654529	-	Chr3:2651951-2661709C	PB.3911.1/PB.3911.10/PB.3911.11,PB.3911.19
Chr3	Intron retention	2654405	2654271	-	Chr3:2651951-2661709C	PB.3911.1/PB.3911.10/PB.3911.11,PB.3911.13/PB.3911.21
Chr3	Intron retention	2654446	2654256	-	Chr3:2651951-2661709C	PB.3911.1/PB.3911.10/PB.3911.11,PB.3911.8
Chr3	Intron retention	2654446	2654271	-	Chr3:2651951-2661709C	PB.3911.1/PB.3911.10/PB.3911.11,PB.3911.6
Chr3	Intron retention	2654522	2654271	-	Chr3:2651951-2661709C	PB.3911.1/PB.3911.10/PB.3911.11,PB.3911.18
Chr3	Intron retention	2654522	2654502	-	Chr3:2651951-2661709C	PB.3911.1/PB.3911.10/PB.3911.11,PB.3911.14/PB.3911.20/PB.3911.4
Chr3	Intron retention	2652784	2652673	-	Chr3:2651951-2661709C	PB.3911.10,PB.3911.11
Chr3	Alternative 5' splice site	3082132	3082057	-	Chr3:3075981-3085824C	PB.3929.2,PB.3929.1/PB.3929.3
Chr3	Alternative 3' splice site	3129541	3129538	-	Chr3:3126244-3130194C	PB.3933.2,PB.3933.3
Chr3	Intron retention	4337506	4337492	-	Chr3:4336760-4338940C	PB.3990.1,PB.3990.2
Chr3	Intron retention	4826362	4826251	-	Chr3:4825577-4829745C	PB.4013.4,PB.4013.1/PB.4013.2
Chr3	Intron retention	5286068	5285523	-	Chr3:5283445-5286878C	PB.4028.1,PB.4028.2/PB.4028.3
Chr3	Intron retention	5764576	5764075	-	Chr3:5760848-5767440C	PB.4046.1,PB.4046.2
Chr3	Intron retention	6136526	6136231	-	Chr3:6131845-6136796C	PB.4070.1,PB.4070.2
Chr3	Intron retention	6273782	6272530	-	Chr3:6271905-6275381C	PB.4075.3,PB.4075.1/PB.4075.2
Chr3	Alternative 5' splice site	6707668	6707664	-	Chr3:6706101-6710621C	PB.4103.1/PB.4103.3/PB.4103.5/PB.4103.6,PB.4103.2/PB.4103.4
Chr3	Alternative 5' splice site	6706976	6706964	-	Chr3:6706101-6710621C	PB.4103.1,PB.4103.2/PB.4103.3/PB.4103.5/PB.4103.6
Chr3	Alternative 5' splice site	6706976	6706970	-	Chr3:6706101-6710621C	PB.4103.1,PB.4103.4
Chr3	Alternative 5' splice site	6706970	6706964	-	Chr3:6706101-6710621C	PB.4103.4,PB.4103.2/PB.4103.3/PB.4103.5/PB.4103.6
Chr3	Exon skipping	7168356	7168277	-	Chr3:7163390-7168863C	PB.4121.1,PB.4121.2
Chr3	Alternative 3' splice site	7437817	7437811	-	Chr3:7434036-7438082C	PB.4129.2,PB.4129.1
Chr3	Intron retention	7576470	7575972	-	Chr3:7573270-7577600C	PB.4140.1,PB.4140.2
Chr3	Alternative 3' splice site	8051665	8051659	-	Chr3:8047352-8052531C	PB.4164.2,PB.4164.1
Chr3	Intron retention	8070149	8070057	-	Chr3:8067517-8071904C	PB.4165.1/PB.4165.2,PB.4165.3
Chr3	Intron retention	8069574	8068973	-	Chr3:8067517-8071904C	PB.4165.2/PB.4165.3,PB.4165.1
Chr3	Intron retention	8440206	8439258	-	Chr3:8437370-8441951C	PB.4175.1,PB.4175.2
Chr3	Intron retention	8577440	8577392	-	Chr3:8573252-8577499C	PB.4179.1,PB.4179.2
Chr3	Intron retention	8768777	8768659	-	Chr3:8767495-8770613C	PB.4193.2,PB.4193.4
Chr3	Intron retention	8768982	8768874	-	Chr3:8767495-8770613C	PB.4193.1,PB.4193.2
Chr3	Intron retention	8768982	8768659	-	Chr3:8767495-8770613C	PB.4193.1,PB.4193.4
Chr3	Intron retention	8769578	8769131	-	Chr3:8767495-8770613C	PB.4193.3,PB.4193.1
Chr3	Intron retention	8769578	8768874	-	Chr3:8767495-8770613C	PB.4193.3,PB.4193.2
Chr3	Intron retention	8769578	8768659	-	Chr3:8767495-8770613C	PB.4193.3,PB.4193.4
Chr3	Alternative 3' splice site	8857769	8857763	-	Chr3:8854630-8859206C	PB.4205.1,PB.4205.2
Chr3	Intron retention	9849349	9849217	-	Chr3:9847702-9850461C	PB.4255.3,PB.4255.1/PB.4255.2
Chr3	Alternative 3' splice site	10092486	10092478	-	Chr3:10090147-10097813C	PB.4269.2,PB.4269.1/PB.4269.4
Chr3	Intron retention	10320770	10320747	-	Chr3:10320253-10324794C	PB.4281.1,PB.4281.2
Chr3	Intron retention	10625141	10625037	-	Chr3:10621713-10625365C	PB.4299.1/PB.4299.3,PB.4299.2
Chr3	Alternative 3' splice site	10973971	10973968	-	Chr3:10970765-10979155C	PB.4313.2,PB.4313.1/PB.4313.4
Chr3	Intron retention	11623221	11623079	-	Chr3:11621926-11627842C	PB.4336.2,PB.4336.1
Chr3	Intron retention	11622860	11622466	-	Chr3:11621926-11627842C	PB.4336.2,PB.4336.1
Chr3	Alternative 5' splice site	12155843	12155822	-	Chr3:12151142-12157603C	PB.4357.2/PB.4357.3,PB.4357.1
Chr3	Intron retention	13067350	13066891	-	Chr3:13063156-13070889C	PB.4394.1,PB.4394.3/PB.4394.4
Chr3	Alternative 5' splice site	13130087	13130035	-	Chr3:13126154-13137488C	PB.4398.2,PB.4398.7
Chr3	Alternative 5' splice site	13130087	13130039	-	Chr3:13126154-13137488C	PB.4398.2,PB.4398.3
Chr3	Alternative 5' splice site	13130039	13130035	-	Chr3:13126154-13137488C	PB.4398.3,PB.4398.7
Chr3	Alternative 3' splice site	13129921	13129918	-	Chr3:13126154-13137488C	PB.4398.8,PB.4398.1/PB.4398.3
Chr3	Alternative 3' splice site	14218356	14218340	-	Chr3:14213116-14220677C	PB.4422.2,PB.4422.3
Chr3	Alternative 3' splice site	15688036	15688026	-	Chr3:15685553-15689250C	PB.4458.2,PB.4458.1
Chr3	Intron retention	16303515	16303427	-	Chr3:16301317-16307624C	PB.4472.5,PB.4472.1/PB.4472.2/PB.4472.6/PB.4472.8/PB.4472.9
Chr3	Intron retention	16303061	16302956	-	Chr3:16301317-16307624C	PB.4472.6,PB.4472.1/PB.4472.2/PB.4472.5/PB.4472.8
Chr3	Intron retention	16409349	16408699	-	Chr3:16407691-16410077C	PB.4477.1/PB.4477.4,PB.4477.2/PB.4477.5
Chr3	Intron retention	16408440	16408335	-	Chr3:16407691-16410077C	PB.4477.3,PB.4477.4
Chr3	Intron retention	19201388	19201289	-	Chr3:19197622-19204101C	PB.4523.2,PB.4523.1
Chr3	Intron retention	22382143	22382015	-	Chr3:22381344-22383931C	PB.4587.2,PB.4587.3
Chr3	Intron retention	24654535	24654443	-	Chr3:24651835-24657641C	PB.4623.2,PB.4623.1
Chr3	Alternative 3' splice site	24853215	24853212	-	Chr3:24850181-24854376C	PB.4628.1,PB.4628.3
Chr3	Intron retention	26154834	26154822	-	Chr3:26152248-26155505C	PB.4655.1,PB.4655.2
Chr3	Intron retention	26210463	26210382	-	Chr3:26207781-26211725C	PB.4657.2,PB.4657.1
Chr3	Alternative 5' splice site	27589889	27589856	-	Chr3:27588785-27592805C	PB.4699.2,PB.4699.1
Chr3	Intron retention	28266080	28263946	-	Chr3:28260584-28266450C	PB.4722.2,PB.4722.1/PB.4722.3
Chr3	Intron retention	28310212	28309897	-	Chr3:28308343-28312108C	PB.4725.1,PB.4725.2
Chr3	Intron retention	29336154	29335528	-	Chr3:29328986-29336556C	PB.4763.3,PB.4763.1
Chr3	Intron retention	30207985	30207908	-	Chr3:30206416-30210436C	PB.4792.3,PB.4792.1/PB.4792.2/PB.4792.4
Chr3	Intron retention	32038725	32038009	-	Chr3:32035000-32040980C	PB.4874.1,PB.4874.2
Chr3	Alternative 3' splice site	32386429	32386423	-	Chr3:32384838-32388220C	PB.4898.2,PB.4898.1
Chr3	Intron retention	32515440	32514910	-	Chr3:32513619-32515996C	PB.4904.2,PB.4904.1
Chr3	Alternative 3' splice site	32564246	32564238	-	Chr3:32560404-32564952C	PB.4906.2,PB.4906.3
Chr3	Alternative 3' splice site	32786845	32786820	-	Chr3:32783469-32787238C	PB.4921.1,PB.4921.2
Chr3	Intron retention	33039276	33039244	-	Chr3:33038041-33043341C	PB.4933.1/PB.4933.2,PB.4933.3
Chr3	Alternative 5' splice site	33047323	33047314	-	Chr3:33045729-33047410C	PB.4934.1,PB.4934.2
Chr3	Alternative 3' splice site	35111968	35111961	-	Chr3:35105060-35112500C	PB.5056.1/PB.5056.2/PB.5056.4,PB.5056.5
Chr3	Intron retention	35111444	35111377	-	Chr3:35105060-35112500C	PB.5056.4,PB.5056.1/PB.5056.2/PB.5056.5
Chr3	Intron retention	35259624	35259604	-	Chr3:35259426-35264555C	PB.5066.1,PB.5066.2
Chr3	Intron retention	35447574	35447503	-	Chr3:35446440-35452470C	PB.5075.5,PB.5075.6
Chr3	Intron retention	35447600	35447503	-	Chr3:35446440-35452470C	PB.5075.3,PB.5075.4
Chr3	Intron retention	35447820	35447503	-	Chr3:35446440-35452470C	PB.5075.3,PB.5075.6
Chr3	Intron retention	35447820	35447687	-	Chr3:35446440-35452470C	PB.5075.3,PB.5075.5
Chr3	Alternative 3' splice site	35447885	35447224	-	Chr3:35446440-35452470C	PB.5075.3,PB.5075.1
Chr3	Intron retention	35448110	35447224	-	Chr3:35446440-35452470C	PB.5075.2,PB.5075.1
Chr3	Intron retention	35448110	35447885	-	Chr3:35446440-35452470C	PB.5075.2,PB.5075.3
Chr3	Intron retention	35448110	35447503	-	Chr3:35446440-35452470C	PB.5075.2,PB.5075.4
Chr3	Intron retention	35448110	35447503	-	Chr3:35446440-35452470C	PB.5075.2,PB.5075.6
Chr3	Intron retention	35448110	35447687	-	Chr3:35446440-35452470C	PB.5075.2,PB.5075.5
Chr3	Alternative 5' splice site	35871029	35870998	-	Chr3:35868733-35875530C	PB.5097.2,PB.5097.1
Chr3	Intron retention	35976358	35976151	-	Chr3:35975440-35978918C	PB.5104.2,PB.5104.1/PB.5104.3
Chr3	Alternative 3' splice site	36003789	36003774	-	Chr3:36001927-36007484C	PB.5107.2/PB.5107.3,PB.5107.1/PB.5107.4
Chr3	Alternative 3' splice site	36275793	36275783	-	Chr3:36273392-36278557C	PB.5123.2,PB.5123.1
Chr4	Exon skipping	1093855	1093996	+	Chr4:1093377-1098656W	PB.5149.1,PB.5149.2
Chr4	Intron retention	11336377	11336922	+	Chr4:11335804-11338812W	PB.5228.1,PB.5228.2
Chr4	Alternative 5' splice site	12382294	12382332	+	Chr4:12382061-12385338W	PB.5238.3,PB.5238.2
Chr4	Alternative 5' splice site	14713253	14713267	+	Chr4:14711420-14716710W	PB.5252.2/PB.5252.5,PB.5252.1/PB.5252.3/PB.5252.4
Chr4	Intron retention	14714642	14714996	+	Chr4:14711420-14716710W	PB.5252.5,PB.5252.1/PB.5252.2/PB.5252.3/PB.5252.4
Chr4	Intron retention	14715185	14715456	+	Chr4:14711420-14716710W	PB.5252.1/PB.5252.2/PB.5252.5,PB.5252.3/PB.5252.4
Chr4	Intron retention	14715712	14715833	+	Chr4:14711420-14716710W	PB.5252.3,PB.5252.1/PB.5252.2/PB.5252.4/PB.5252.5
Chr4	Alternative 3' splice site	19380004	19380007	+	Chr4:19378327-19382786W	PB.5298.1/PB.5298.2,PB.5298.3
Chr4	Intron retention	20343589	20343747	+	Chr4:20338877-20344950W	PB.5327.1,PB.5327.2
Chr4	Intron retention	20708630	20708690	+	Chr4:20708031-20709862W	PB.5338.3,PB.5338.6
Chr4	Intron retention	20708621	20708682	+	Chr4:20708031-20709862W	PB.5338.4,PB.5338.5
Chr4	Intron retention	20708081	20708098	+	Chr4:20708031-20709862W	PB.5338.4,PB.5338.3
Chr4	Intron retention	21265207	21265766	+	Chr4:21263917-21268222W	PB.5345.2,PB.5345.1
Chr4	Intron retention	21382594	21384438	+	Chr4:21380961-21385784W	PB.5350.3,PB.5350.1/PB.5350.2
Chr4	Intron retention	21416271	21418982	+	Chr4:21405295-21419966W	PB.5352.3,PB.5352.1/PB.5352.2
Chr4	Exon skipping	22168660	22168738	+	Chr4:22168339-22170973W	PB.5375.1/PB.5375.3,PB.5375.2
Chr4	Alternative 3' splice site	22554684	22554692	+	Chr4:22550452-22555031W	PB.5389.2,PB.5389.1
Chr4	Alternative 3' splice site	23104520	23104814	+	Chr4:23104043-23107589W	PB.5410.1,PB.5410.2
Chr4	Alternative 5' splice site	24265398	24265402	+	Chr4:24261407-24267812W	PB.5455.1/PB.5455.4,PB.5455.2
Chr4	Intron retention	24265398	24265683	+	Chr4:24261407-24267812W	PB.5455.3,PB.5455.1/PB.5455.4
Chr4	Intron retention	24265402	24265683	+	Chr4:24261407-24267812W	PB.5455.3,PB.5455.2
Chr4	Intron retention	24371868	24371924	+	Chr4:24371809-24375296W	PB.5461.1,PB.5461.2
Chr4	Alternative 3' splice site	24612931	24612938	+	Chr4:24611345-24615164W	PB.5467.2,PB.5467.1
Chr4	Alternative 3' splice site	25048845	25048854	+	Chr4:25048474-25054477W	PB.5483.1/PB.5483.3,PB.5483.2
Chr4	Alternative 5' splice site	25053845	25053865	+	Chr4:25048474-25054477W	PB.5483.1,PB.5483.2/PB.5483.3
Chr4	Intron retention	25168982	25169832	+	Chr4:25165944-25170729W	PB.5490.2,PB.5490.1
Chr4	Intron retention	25212114	25212136	+	Chr4:25207852-25213903W	PB.5492.1,PB.5492.2
Chr4	Intron retention	25543721	25543811	+	Chr4:25543327-25548914W	PB.5504.2,PB.5504.1/PB.5504.3
Chr4	Alternative 5' splice site	26366144	26366150	+	Chr4:26364147-26367851W	PB.5532.2,PB.5532.1
Chr4	Exon skipping	26478785	26478875	+	Chr4:26475461-26481227W	PB.5536.2,PB.5536.1
Chr4	Intron retention	26479150	26479235	+	Chr4:26475461-26481227W	PB.5536.2,PB.5536.1
Chr4	Intron retention	27424984	27425075	+	Chr4:27423438-27426325W	PB.5575.5,PB.5575.1/PB.5575.2/PB.5575.3/PB.5575.4
Chr4	Alternative 3' splice site	27792596	27792609	+	Chr4:27791880-27795798W	PB.5585.1,PB.5585.2/PB.5585.3
Chr4	Intron retention	27984465	27985164	+	Chr4:27984103-27990666W	PB.5593.3,PB.5593.1/PB.5593.2
Chr4	Alternative 3' splice site	28864913	28864919	+	Chr4:28862571-28869009W	PB.5619.1,PB.5619.2
Chr4	Alternative 3' splice site	29068512	29068636	+	Chr4:29065880-29069199W	PB.5625.1,PB.5625.2
Chr4	Intron retention	29804858	29805004	+	Chr4:29803050-29805995W	PB.5658.2,PB.5658.1
Chr4	Intron retention	30273825	30274179	+	Chr4:30271225-30276298W	PB.5680.2,PB.5680.1/PB.5680.3/PB.5680.4
Chr4	Intron retention	30274866	30275099	+	Chr4:30271225-30276298W	PB.5680.3,PB.5680.1/PB.5680.2/PB.5680.4
Chr4	Intron retention	31028825	31029242	+	Chr4:31026615-31031261W	PB.5712.1,PB.5712.2
Chr4	Intron retention	31547300	31547311	+	Chr4:31544124-31551209W	PB.5740.1,PB.5740.2
Chr4	Intron retention	31694776	31694862	+	Chr4:31692924-31696642W	PB.5746.1,PB.5746.2
Chr4	Alternative 3' splice site	32577277	32577297	+	Chr4:32574402-32581675W	PB.5791.2,PB.5791.1/PB.5791.3
Chr4	Alternative 5' splice site	32578737	32578747	+	Chr4:32574402-32581675W	PB.5791.1/PB.5791.2,PB.5791.3
Chr4	Exon skipping	32752831	32752946	+	Chr4:32752478-32758739W	PB.5801.2,PB.5801.1
Chr4	Alternative 3' splice site	32823409	32823420	+	Chr4:32820601-32825404W	PB.5806.2,PB.5806.1
Chr4	Exon skipping	33308459	33308579	+	Chr4:33306494-33310136W	PB.5826.1,PB.5826.2
Chr4	Intron retention	33315882	33315953	+	Chr4:33314660-33319037W	PB.5827.1,PB.5827.2
Chr4	Intron retention	33669829	33670023	+	Chr4:33665030-33672745W	PB.5840.1,PB.5840.2
Chr4	Intron retention	34739639	34739911	+	Chr4:34737994-34742718W	PB.5894.3,PB.5894.1/PB.5894.2
Chr4	Intron retention	34741381	34741587	+	Chr4:34737994-34742718W	PB.5894.3,PB.5894.1/PB.5894.2
Chr4	Alternative 3' splice site	796232	795935	-	Chr4:793538-799315C	PB.5144.1,PB.5144.2
Chr4	Intron retention	2891171	2890966	-	Chr4:2889775-2891435C	PB.5166.1,PB.5166.2
Chr4	Intron retention	2890390	2890137	-	Chr4:2889775-2891435C	PB.5166.1,PB.5166.2
Chr4	Intron retention	9077145	9077101	-	Chr4:9075191-9077847C	PB.5201.1/PB.5201.4,PB.5201.2
Chr4	Intron retention	9139002	9138338	-	Chr4:9137342-9139765C	PB.5206.1,PB.5206.2
Chr4	Intron retention	9168326	9167785	-	Chr4:9167128-9169381C	PB.5210.1,PB.5210.2
Chr4	Intron retention	9368912	9368755	-	Chr4:9367938-9369135C	PB.5219.2,PB.5219.1
Chr4	Alternative 5' splice site	18606291	18606078	-	Chr4:18602663-18609090C	PB.5284.1,PB.5284.2
Chr4	Intron retention	19607103	19606873	-	Chr4:19601355-19607922C	PB.5303.1/PB.5303.3,PB.5303.2
Chr4	Intron retention	20129165	20128312	-	Chr4:20124673-20131006C	PB.5317.5,PB.5317.1/PB.5317.2/PB.5317.3/PB.5317.4
Chr4	Intron retention	21541833	21541753	-	Chr4:21539457-21543522C	PB.5356.5,PB.5356.1/PB.5356.2/PB.5356.3
Chr4	Intron retention	21540805	21540570	-	Chr4:21539457-21543522C	PB.5356.2,PB.5356.1/PB.5356.3/PB.5356.5
Chr4	Intron retention	22357517	22356932	-	Chr4:22355336-22357949C	PB.5383.3,PB.5383.1/PB.5383.2
Chr4	Alternative 3' splice site	22356499	22356486	-	Chr4:22355336-22357949C	PB.5383.3,PB.5383.1/PB.5383.2
Chr4	Alternative 3' splice site	23978714	23978711	-	Chr4:23976074-23979361C	PB.5447.3,PB.5447.2
Chr4	Intron retention	24181668	24181503	-	Chr4:24180673-24187332C	PB.5452.4,PB.5452.1/PB.5452.2/PB.5452.3
Chr4	Intron retention	24529166	24528869	-	Chr4:24527919-24530537C	PB.5464.2,PB.5464.1/PB.5464.3/PB.5464.4
Chr4	Intron retention	24859323	24859190	-	Chr4:24857983-24859659C	PB.5474.5,PB.5474.3
Chr4	Intron retention	25576580	25576507	-	Chr4:25573672-25579659C	PB.5505.2,PB.5505.1/PB.5505.3
Chr4	Exon skipping	27281510	27281465	-	Chr4:27275219-27282790C	PB.5571.1,PB.5571.2/PB.5571.3
Chr4	Exon skipping	27786273	27786107	-	Chr4:27783494-27787139C	PB.5584.1/PB.5584.2/PB.5584.4/PB.5584.5,PB.5584.3
Chr4	Intron retention	29275605	29275550	-	Chr4:29275039-29277267C	PB.5636.1,PB.5636.2
Chr4	Intron retention	29818113	29817900	-	Chr4:29814027-29818148C	PB.5659.1,PB.5659.2
Chr4	Intron retention	29977510	29975799	-	Chr4:29975251-29977823C	PB.5664.2,PB.5664.1
Chr4	Alternative 5' splice site	30318098	30318085	-	Chr4:30317723-30321807C	PB.5683.2,PB.5683.1
Chr4	Intron retention	30829170	30829158	-	Chr4:30825727-30829581C	PB.5703.2,PB.5703.1
Chr4	Alternative 3' splice site	31672436	31672305	-	Chr4:31669116-31674609C	PB.5743.5,PB.5743.6
Chr4	Alternative 3' splice site	31672436	31672427	-	Chr4:31669116-31674609C	PB.5743.5,PB.5743.8
Chr4	Alternative 3' splice site	31672427	31672305	-	Chr4:31669116-31674609C	PB.5743.8,PB.5743.6
Chr4	Intron retention	31673726	31672436	-	Chr4:31669116-31674609C	PB.5743.3,PB.5743.5
Chr4	Intron retention	31673726	31672305	-	Chr4:31669116-31674609C	PB.5743.3,PB.5743.6
Chr4	Intron retention	31673726	31672427	-	Chr4:31669116-31674609C	PB.5743.3,PB.5743.8
Chr4	Exon skipping	31672436	31672213	-	Chr4:31669116-31674609C	PB.5743.1/PB.5743.2/PB.5743.4/PB.5743.9,PB.5743.5
Chr4	Exon skipping	31672305	31672213	-	Chr4:31669116-31674609C	PB.5743.1/PB.5743.2/PB.5743.4/PB.5743.9,PB.5743.6
Chr4	Exon skipping	31672427	31672213	-	Chr4:31669116-31674609C	PB.5743.1/PB.5743.2/PB.5743.4/PB.5743.9,PB.5743.8
Chr4	Alternative 5' splice site	31673726	31672213	-	Chr4:31669116-31674609C	PB.5743.1/PB.5743.2/PB.5743.4/PB.5743.9,PB.5743.3
Chr4	Intron retention	31672213	31671814	-	Chr4:31669116-31674609C	PB.5743.7,PB.5743.3
Chr4	Intron retention	31673726	31671814	-	Chr4:31669116-31674609C	PB.5743.7,PB.5743.1/PB.5743.2/PB.5743.4/PB.5743.9
Chr4	Intron retention	31673726	31671814	-	Chr4:31669116-31674609C	PB.5743.7,PB.5743.5
Chr4	Intron retention	31673726	31671814	-	Chr4:31669116-31674609C	PB.5743.7,PB.5743.6
Chr4	Intron retention	31673726	31671814	-	Chr4:31669116-31674609C	PB.5743.7,PB.5743.8
Chr4	Intron retention	31671102	31671014	-	Chr4:31669116-31674609C	PB.5743.9,PB.5743.1/PB.5743.2/PB.5743.3/PB.5743.4/PB.5743.5/PB.5743.6/PB.5743.7/PB.5743.8
Chr4	Intron retention	31669369	31669356	-	Chr4:31669116-31674609C	PB.5743.3/PB.5743.5/PB.5743.6,PB.5743.4
Chr4	Intron retention	31850291	31849879	-	Chr4:31848495-31850875C	PB.5755.1,PB.5755.2
Chr4	Alternative 3' splice site	32737126	32737123	-	Chr4:32735959-32739848C	PB.5800.3,PB.5800.2
Chr4	Intron retention	32736899	32736672	-	Chr4:32735959-32739848C	PB.5800.3,PB.5800.2
Chr4	Alternative 3' splice site	32809467	32809458	-	Chr4:32807645-32813136C	PB.5805.2,PB.5805.1
Chr4	Intron retention	33737448	33736718	-	Chr4:33735165-33739400C	PB.5845.1,PB.5845.2
Chr4	Intron retention	34076904	34075750	-	Chr4:34074097-34077266C	PB.5860.2,PB.5860.1
Chr4	Intron retention	34116723	34116536	-	Chr4:34114118-34116915C	PB.5864.1,PB.5864.2
Chr4	Intron retention	34284450	34284347	-	Chr4:34278548-34285702C	PB.5874.2,PB.5874.1
Chr4	Alternative 3' splice site	34630407	34630391	-	Chr4:34626341-34631340C	PB.5886.1,PB.5886.2
Chr4	Alternative 3' splice site	34819586	34819568	-	Chr4:34816657-34820094C	PB.5898.1,PB.5898.2
Chr4	Intron retention	35023768	35023645	-	Chr4:35022011-35028135C	PB.5915.2,PB.5915.1
Chr4	Alternative 3' splice site	35420609	35420505	-	Chr4:35418950-35421481C	PB.5936.4,PB.5936.2/PB.5936.5
Chr4	Intron retention	35468231	35468121	-	Chr4:35467007-35471513C	PB.5943.2,PB.5943.3
Chr5	Intron retention	94180	94906	+	Chr5:91714-95781W	PB.5951.2,PB.5951.1
Chr5	Alternative 3' splice site	318726	318729	+	Chr5:317221-320773W	PB.5972.2,PB.5972.3
Chr5	Intron retention	472988	473298	+	Chr5:471400-476283W	PB.5983.1/PB.5983.3,PB.5983.2
Chr5	Intron retention	2538529	2538714	+	Chr5:2536559-2540743W	PB.6060.2,PB.6060.1/PB.6060.3
Chr5	Alternative 5' splice site	2569382	2569406	+	Chr5:2564429-2573086W	PB.6062.2,PB.6062.1
Chr5	Alternative 5' splice site	2714137	2714138	+	Chr5:2713290-2716784W	PB.6067.1,PB.6067.2
Chr5	Intron retention	3328958	3329050	+	Chr5:3323022-3334614W	PB.6096.2,PB.6096.1
Chr5	Alternative 3' splice site	4406756	4406763	+	Chr5:4401878-4407220W	PB.6123.1,PB.6123.2
Chr5	Intron retention	4706116	4706519	+	Chr5:4704643-4708577W	PB.6129.1,PB.6129.2
Chr5	Alternative 3' splice site	5438251	5438257	+	Chr5:5437112-5445095W	PB.6143.1,PB.6143.2
Chr5	Alternative 3' splice site	8015630	8015650	+	Chr5:8014344-8017420W	PB.6179.2,PB.6179.1
Chr5	Intron retention	9434802	9435270	+	Chr5:9432375-9436135W	PB.6190.2,PB.6190.1/PB.6190.3
Chr5	Alternative 3' splice site	14161583	14161597	+	Chr5:14161390-14165665W	PB.6234.4,PB.6234.1/PB.6234.2/PB.6234.3
Chr5	Intron retention	14185230	14185600	+	Chr5:14181386-14186333W	PB.6237.3,PB.6237.1/PB.6237.2
Chr5	Intron retention	14194069	14194347	+	Chr5:14191551-14197328W	PB.6238.3,PB.6238.2
Chr5	Alternative 3' splice site	14879921	14879934	+	Chr5:14879434-14881879W	PB.6246.1,PB.6246.2
Chr5	Intron retention	16514043	16514175	+	Chr5:16512057-16517788W	PB.6269.2,PB.6269.1
Chr5	Alternative 3' splice site	16514958	16514962	+	Chr5:16512057-16517788W	PB.6269.1,PB.6269.2
Chr5	Intron retention	16696999	16697037	+	Chr5:16696784-16701584W	PB.6274.2,PB.6274.1
Chr5	Intron retention	17211975	17213106	+	Chr5:17209580-17215951W	PB.6282.2,PB.6282.1
Chr5	Intron retention	17211471	17213106	+	Chr5:17209580-17215951W	PB.6282.3,PB.6282.1
Chr5	Intron retention	17211471	17211832	+	Chr5:17209580-17215951W	PB.6282.3,PB.6282.2
Chr5	Intron retention	17294791	17294907	+	Chr5:17289199-17296372W	PB.6283.1,PB.6283.2
Chr5	Alternative 3' splice site	17586770	17586773	+	Chr5:17582905-17588172W	PB.6289.3,PB.6289.1
Chr5	Alternative 3' splice site	20740387	20740428	+	Chr5:20737891-20741084W	PB.6383.2,PB.6383.1
Chr5	Intron retention	21123062	21123142	+	Chr5:21120838-21126806W	PB.6395.1,PB.6395.2
Chr5	Intron retention	21372906	21373664	+	Chr5:21370156-21376555W	PB.6404.3,PB.6404.1/PB.6404.5
Chr5	Intron retention	21372563	21373664	+	Chr5:21370156-21376555W	PB.6404.2/PB.6404.4/PB.6404.6,PB.6404.1/PB.6404.5
Chr5	Intron retention	21372563	21372820	+	Chr5:21370156-21376555W	PB.6404.2/PB.6404.4/PB.6404.6,PB.6404.3
Chr5	Intron retention	21374716	21375101	+	Chr5:21370156-21376555W	PB.6404.4,PB.6404.1/PB.6404.2/PB.6404.3/PB.6404.5/PB.6404.6
Chr5	Alternative 3' splice site	25459434	25459439	+	Chr5:25458624-25462075W	PB.6535.1,PB.6535.2
Chr5	Alternative 3' splice site	25772555	25772561	+	Chr5:25771870-25776090W	PB.6549.2/PB.6549.3,PB.6549.4
Chr5	Intron retention	26852809	26853266	+	Chr5:26849855-26857023W	PB.6588.1,PB.6588.2
Chr5	Exon skipping	27043585	27043664	+	Chr5:27043328-27048565W	PB.6601.3,PB.6601.1/PB.6601.2
Chr5	Intron retention	27047219	27047444	+	Chr5:27043328-27048565W	PB.6601.2,PB.6601.1/PB.6601.3
Chr5	Intron retention	27544973	27545233	+	Chr5:27542126-27545922W	PB.6619.1,PB.6619.2
Chr5	Intron retention	27714482	27715795	+	Chr5:27712432-27717725W	PB.6630.2,PB.6630.1
Chr5	Intron retention	27716521	27716757	+	Chr5:27712432-27717725W	PB.6630.2,PB.6630.1
Chr5	Intron retention	27861245	27861363	+	Chr5:27860549-27865052W	PB.6641.1,PB.6641.2
Chr5	Intron retention	28080431	28080996	+	Chr5:28080214-28082849W	PB.6652.2,PB.6652.1
Chr5	Alternative 3' splice site	28945420	28945426	+	Chr5:28940352-28948381W	PB.6685.1,PB.6685.2
Chr5	Intron retention	29337350	29337366	+	Chr5:29336079-29340511W	PB.6699.1,PB.6699.2
Chr5	Intron retention	41361	41247	-	Chr5:38775-47186C	PB.5946.2,PB.5946.1
Chr5	Alternative 5' splice site	150713	150708	-	Chr5:149951-152103C	PB.5957.2,PB.5957.1
Chr5	Intron retention	277956	277850	-	Chr5:267958-278060C	PB.5968.1,PB.5968.2
Chr5	Alternative 3' splice site	356136	356125	-	Chr5:354150-356642C	PB.5975.2/PB.5975.3,PB.5975.1/PB.5975.4
Chr5	Intron retention	3012218	3010596	-	Chr5:3008647-3012725C	PB.6082.2,PB.6082.1
Chr5	Intron retention	4977805	4977705	-	Chr5:4976747-4981819C	PB.6135.2,PB.6135.1
Chr5	Alternative 3' splice site	5259148	5259115	-	Chr5:5254441-5262193C	PB.6136.1,PB.6136.2
Chr5	Alternative 3' splice site	8588387	8588384	-	Chr5:8584610-8589477C	PB.6185.3,PB.6185.2
Chr5	Alternative 5' splice site	13422600	13422560	-	Chr5:13421553-13424003C	PB.6222.1,PB.6222.2/PB.6222.3
Chr5	Intron retention	13763257	13763246	-	Chr5:13755492-13763444C	PB.6230.2,PB.6230.1
Chr5	Alternative 3' splice site	15094500	15094492	-	Chr5:15092219-15095111C	PB.6251.1,PB.6251.2
Chr5	Alternative 5' splice site	16990071	16989998	-	Chr5:16988934-16994038C	PB.6279.1,PB.6279.2
Chr5	Intron retention	18315838	18315227	-	Chr5:18313444-18318440C	PB.6305.3,PB.6305.1/PB.6305.2/PB.6305.4/PB.6305.5
Chr5	Intron retention	18840340	18838872	-	Chr5:18838385-18840779C	PB.6319.1,PB.6319.2
Chr5	Intron retention	19512957	19512942	-	Chr5:19509970-19514153C	PB.6345.1,PB.6345.2
Chr5	Alternative 3' splice site	19845510	19845458	-	Chr5:19838510-19846590C	PB.6356.1,PB.6356.3
Chr5	Alternative 3' splice site	19845510	19845429	-	Chr5:19838510-19846590C	PB.6356.1,PB.6356.4
Chr5	Alternative 3' splice site	19845458	19845429	-	Chr5:19838510-19846590C	PB.6356.3,PB.6356.4
Chr5	Alternative 5' splice site	20485387	20485367	-	Chr5:20484962-20490251C	PB.6373.3,PB.6373.2
Chr5	Alternative 3' splice site	20571081	20571078	-	Chr5:20568924-20573630C	PB.6376.1,PB.6376.2
Chr5	Exon skipping	20570868	20570752	-	Chr5:20568924-20573630C	PB.6376.2,PB.6376.1
Chr5	Intron retention	20881394	20881283	-	Chr5:20880323-20884479C	PB.6389.1,PB.6389.2/PB.6389.3
Chr5	Alternative 5' splice site	21420509	21420498	-	Chr5:21414977-21420690C	PB.6407.1,PB.6407.3
Chr5	Alternative 3' splice site	22627974	22627958	-	Chr5:22625640-22629067C	PB.6446.1,PB.6446.2
Chr5	Alternative 5' splice site	22627311	22627295	-	Chr5:22625640-22629067C	PB.6446.1,PB.6446.2
Chr5	Intron retention	24764044	24763393	-	Chr5:24762187-24767802C	PB.6516.1,PB.6516.2
Chr5	Intron retention	24763345	24763108	-	Chr5:24762187-24767802C	PB.6516.3,PB.6516.1
Chr5	Intron retention	24764044	24763108	-	Chr5:24762187-24767802C	PB.6516.3,PB.6516.2
Chr5	Alternative 5' splice site	25335720	25335713	-	Chr5:25331561-25339652C	PB.6531.1/PB.6531.2/PB.6531.4/PB.6531.5,PB.6531.3
Chr5	Intron retention	25332573	25332461	-	Chr5:25331561-25339652C	PB.6531.4,PB.6531.1/PB.6531.2/PB.6531.3/PB.6531.5
Chr5	Intron retention	26181435	26180735	-	Chr5:26180118-26182355C	PB.6563.2,PB.6563.1/PB.6563.3
Chr5	Intron retention	27239822	27239740	-	Chr5:27236768-27243464C	PB.6609.2,PB.6609.3
Chr5	Intron retention	27650790	27650624	-	Chr5:27648087-27653694C	PB.6626.3,PB.6626.1/PB.6626.2/PB.6626.4
Chr5	Intron retention	27649735	27649605	-	Chr5:27648087-27653694C	PB.6626.4,PB.6626.1/PB.6626.3
Chr5	Intron retention	27649555	27649250	-	Chr5:27648087-27653694C	PB.6626.2,PB.6626.1/PB.6626.3
Chr5	Intron retention	28191521	28191079	-	Chr5:28188762-28194025C	PB.6660.2,PB.6660.1/PB.6660.3/PB.6660.4/PB.6660.5/PB.6660.6
Chr5	Intron retention	28190679	28190549	-	Chr5:28188762-28194025C	PB.6660.3,PB.6660.1/PB.6660.2/PB.6660.4/PB.6660.5/PB.6660.6
Chr5	Intron retention	29069417	29069369	-	Chr5:29069308-29070133C	PB.6691.1,PB.6691.2
Chr5	Alternative 3' splice site	29573543	29573512	-	Chr5:29571145-29576012C	PB.6712.3,PB.6712.1/PB.6712.2/PB.6712.5
Chr5	Intron retention	29738008	29737825	-	Chr5:29728218-29740830C	PB.6720.2,PB.6720.1
Chr6	Alternative 3' splice site	186304	186324	+	Chr6:185710-191345W	PB.6728.4,PB.6728.1/PB.6728.2/PB.6728.3
Chr6	Intron retention	404124	404290	+	Chr6:403725-410150W	PB.6743.1/PB.6743.3,PB.6743.2
Chr6	Intron retention	888635	888724	+	Chr6:885827-892504W	PB.6767.2,PB.6767.1/PB.6767.3/PB.6767.4/PB.6767.5
Chr6	Intron retention	889567	889663	+	Chr6:885827-892504W	PB.6767.5,PB.6767.1/PB.6767.2/PB.6767.3/PB.6767.4
Chr6	Intron retention	1344365	1344436	+	Chr6:1341608-1344490W	PB.6775.2,PB.6775.1
Chr6	Intron retention	2258569	2258719	+	Chr6:2256867-2261000W	PB.6825.1,PB.6825.2/PB.6825.3
Chr6	Alternative 5' splice site	2560533	2560548	+	Chr6:2558019-2562235W	PB.6839.1,PB.6839.2
Chr6	Intron retention	3922226	3922292	+	Chr6:3919530-3924382W	PB.6885.1/PB.6885.3,PB.6885.2
Chr6	Intron retention	4668879	4669455	+	Chr6:4667448-4670760W	PB.6903.1,PB.6903.2/PB.6903.3
Chr6	Intron retention	5228818	5228918	+	Chr6:5227411-5231611W	PB.6917.4,PB.6917.1/PB.6917.2/PB.6917.3
Chr6	Intron retention	6719887	6720294	+	Chr6:6716297-6721913W	PB.6951.2,PB.6951.1
Chr6	Alternative 3' splice site	7577824	7577834	+	Chr6:7574942-7581541W	PB.6969.2,PB.6969.1
Chr6	Alternative 3' splice site	7663581	7663592	+	Chr6:7661755-7670009W	PB.6972.2/PB.6972.3,PB.6972.1
Chr6	Alternative 3' splice site	8099377	8099528	+	Chr6:8097289-8104241W	PB.6980.1,PB.6980.2
Chr6	Alternative 3' splice site	8722740	8722757	+	Chr6:8720628-8726645W	PB.6990.1/PB.6990.2,PB.6990.3
Chr6	Intron retention	8722913	8722933	+	Chr6:8720628-8726645W	PB.6990.1,PB.6990.2/PB.6990.3
Chr6	Alternative 3' splice site	9364889	9364903	+	Chr6:9364065-9368009W	PB.7003.2,PB.7003.1
Chr6	Intron retention	16651238	16651326	+	Chr6:16649549-16653254W	PB.7085.1/PB.7085.2,PB.7085.3
Chr6	Intron retention	17315605	17315675	+	Chr6:17311207-17318579W	PB.7092.1/PB.7092.2/PB.7092.3,PB.7092.4
Chr6	Exon skipping	19316589	19316667	+	Chr6:19315109-19320638W	PB.7112.2,PB.7112.1
Chr6	Alternative 3' splice site	23120719	23120734	+	Chr6:23119058-23122194W	PB.7160.2,PB.7160.3
Chr6	Intron retention	24270940	24272023	+	Chr6:24268860-24273364W	PB.7190.3,PB.7190.2
Chr6	Intron retention	24272092	24272543	+	Chr6:24268860-24273364W	PB.7190.1,PB.7190.3
Chr6	Alternative 5' splice site	25690587	25690595	+	Chr6:25690158-25693854W	PB.7211.8,PB.7211.7
Chr6	Alternative 3' splice site	25691234	25691265	+	Chr6:25690158-25693854W	PB.7211.3,PB.7211.4
Chr6	Alternative 5' splice site	25692292	25692311	+	Chr6:25690158-25693854W	PB.7211.4,PB.7211.1/PB.7211.3/PB.7211.6/PB.7211.7
Chr6	Alternative 5' splice site	26533040	26533751	+	Chr6:26529305-26538019W	PB.7236.1,PB.7236.2
Chr6	Intron retention	27273716	27274532	+	Chr6:27272093-27275174W	PB.7255.1,PB.7255.2
Chr6	Alternative 3' splice site	27416095	27416103	+	Chr6:27412678-27417549W	PB.7261.2,PB.7261.1/PB.7261.3
Chr6	Alternative 3' splice site	28291177	28291184	+	Chr6:28286534-28293418W	PB.7289.1/PB.7289.3,PB.7289.2
Chr6	Alternative 3' splice site	28586924	28586977	+	Chr6:28586492-28590205W	PB.7305.1,PB.7305.2/PB.7305.3
Chr6	Intron retention	29133471	29133922	+	Chr6:29133106-29134571W	PB.7322.1,PB.7322.2
Chr6	Alternative 3' splice site	29724714	29724722	+	Chr6:29723525-29727093W	PB.7346.2,PB.7346.1
Chr6	Intron retention	29740868	29741199	+	Chr6:29738892-29742532W	PB.7348.2,PB.7348.1
Chr6	Intron retention	30140914	30140932	+	Chr6:30136554-30141158W	PB.7364.1,PB.7364.2
Chr6	Intron retention	30372417	30373090	+	Chr6:30371004-30374545W	PB.7372.2,PB.7372.1/PB.7372.3
Chr6	Alternative 3' splice site	31073606	31073619	+	Chr6:31069085-31077398W	PB.7406.1,PB.7406.2
Chr6	Intron retention	31129402	31129633	+	Chr6:31127430-31130689W	PB.7410.3,PB.7410.1/PB.7410.4
Chr6	Alternative 3' splice site	280232	280222	-	Chr6:276706-282198C	PB.6737.1,PB.6737.2
Chr6	Intron retention	278709	278575	-	Chr6:276706-282198C	PB.6737.1,PB.6737.2
Chr6	Intron retention	1643194	1643091	-	Chr6:1642663-1643796C	PB.6795.1,PB.6795.2
Chr6	Exon skipping	1935854	1935832	-	Chr6:1931305-1936380C	PB.6811.1,PB.6811.2
Chr6	Alternative 5' splice site	2288194	2287940	-	Chr6:2285945-2289955C	PB.6828.1,PB.6828.2
Chr6	Alternative 5' splice site	2321799	2321755	-	Chr6:2320822-2329664C	PB.6829.3,PB.6829.1
Chr6	Intron retention	2910385	2910330	-	Chr6:2908046-2910483C	PB.6855.1,PB.6855.2
Chr6	Intron retention	4214232	4214182	-	Chr6:4213277-4218152C	PB.6894.1,PB.6894.2
Chr6	Alternative 3' splice site	5040245	5039377	-	Chr6:5036119-5040991C	PB.6915.3,PB.6915.1/PB.6915.2/PB.6915.4
Chr6	Intron retention	6648804	6648540	-	Chr6:6648390-6653001C	PB.6950.2,PB.6950.3
Chr6	Alternative 3' splice site	7407993	7407884	-	Chr6:7406118-7408609C	PB.6964.2,PB.6964.1/PB.6964.3
Chr6	Intron retention	8014278	8013257	-	Chr6:8011873-8014834C	PB.6978.1,PB.6978.2
Chr6	Intron retention	8979013	8978831	-	Chr6:8977310-8981570C	PB.6997.2,PB.6997.1/PB.6997.3
Chr6	Intron retention	10693247	10693117	-	Chr6:10690741-10694185C	PB.7018.1,PB.7018.2
Chr6	Intron retention	11698797	11698705	-	Chr6:11696840-11701298C	PB.7030.4,PB.7030.1/PB.7030.2/PB.7030.3/PB.7030.5
Chr6	Exon skipping	15415684	15415557	-	Chr6:15414867-15423582C	PB.7070.2/PB.7070.4,PB.7070.1/PB.7070.3
Chr6	Intron retention	16615255	16615129	-	Chr6:16604884-16616266C	PB.7084.2,PB.7084.1
Chr6	Intron retention	16743698	16743628	-	Chr6:16732925-16745667C	PB.7087.2,PB.7087.1
Chr6	Alternative 3' splice site	21344123	21344092	-	Chr6:21343402-21350170C	PB.7138.3,PB.7138.2
Chr6	Alternative 3' splice site	21344092	21344083	-	Chr6:21343402-21350170C	PB.7138.2,PB.7138.1
Chr6	Alternative 3' splice site	21344123	21344083	-	Chr6:21343402-21350170C	PB.7138.3,PB.7138.1
Chr6	Alternative 3' splice site	24095588	24095579	-	Chr6:24091261-24096122C	PB.7184.1/PB.7184.4/PB.7184.5,PB.7184.3
Chr6	Intron retention	24094923	24094307	-	Chr6:24091261-24096122C	PB.7184.2,PB.7184.1/PB.7184.3/PB.7184.4
Chr6	Alternative 3' splice site	27679576	27679569	-	Chr6:27676392-27679756C	PB.7270.1/PB.7270.3/PB.7270.4,PB.7270.2
Chr6	Intron retention	27678188	27677201	-	Chr6:27676392-27679756C	PB.7270.3,PB.7270.1/PB.7270.2/PB.7270.4
Chr6	Intron retention	28062168	28062083	-	Chr6:28059425-28065139C	PB.7282.1,PB.7282.2/PB.7282.3
Chr6	Alternative 3' splice site	28060629	28060619	-	Chr6:28059425-28065139C	PB.7282.1/PB.7282.2,PB.7282.3
Chr6	Alternative 3' splice site	28161912	28161907	-	Chr6:28158578-28164557C	PB.7286.4,PB.7286.2
Chr6	Intron retention	28507838	28507646	-	Chr6:28504142-28508618C	PB.7303.3,PB.7303.1/PB.7303.2/PB.7303.4/PB.7303.5
Chr6	Intron retention	29509633	29509509	-	Chr6:29508910-29515112C	PB.7335.1,PB.7335.2
Chr6	Alternative 3' splice site	29707675	29707594	-	Chr6:29703553-29708106C	PB.7344.1,PB.7344.2
Chr6	Intron retention	29980911	29980790	-	Chr6:29978864-29981987C	PB.7358.2,PB.7358.1
Chr6	Intron retention	30466526	30465738	-	Chr6:30464966-30468000C	PB.7376.3,PB.7376.1/PB.7376.4
Chr6	Alternative 5' splice site	31054761	31054682	-	Chr6:31051986-31055930C	PB.7405.1,PB.7405.2
Chr7	Exon skipping	38222	38268	+	Chr7:36138-42288W	PB.7422.1/PB.7422.5,PB.7422.2/PB.7422.3/PB.7422.4
Chr7	Intron retention	40287	40451	+	Chr7:36138-42288W	PB.7422.1/PB.7422.3,PB.7422.2/PB.7422.4/PB.7422.5
Chr7	Alternative 5' splice site	1149596	1150223	+	Chr7:1149377-1152252W	PB.7469.3,PB.7469.5
Chr7	Intron retention	2009034	2009137	+	Chr7:2007640-2013027W	PB.7483.1,PB.7483.2
Chr7	Intron retention	2081632	2081762	+	Chr7:2080018-2083370W	PB.7484.2,PB.7484.1/PB.7484.3
Chr7	Intron retention	2795883	2796452	+	Chr7:2794097-2797341W	PB.7507.2,PB.7507.1/PB.7507.3
Chr7	Alternative 3' splice site	3774270	3774278	+	Chr7:3773300-3779787W	PB.7543.1,PB.7543.2
Chr7	Alternative 3' splice site	4558021	4558026	+	Chr7:4554646-4559662W	PB.7562.2,PB.7562.3
Chr7	Intron retention	4823599	4823979	+	Chr7:4821205-4824666W	PB.7573.3,PB.7573.2
Chr7	Intron retention	6233152	6233571	+	Chr7:6232633-6234439W	PB.7609.2,PB.7609.1
Chr7	Intron retention	7623194	7624851	+	Chr7:7621487-7626697W	PB.7623.2,PB.7623.1
Chr7	Intron retention	8140135	8140502	+	Chr7:8136965-8141057W	PB.7628.2,PB.7628.1/PB.7628.3
Chr7	Alternative 3' splice site	12566543	12567081	+	Chr7:12565815-12570190W	PB.7660.1,PB.7660.2
Chr7	Exon skipping	12568223	12568271	+	Chr7:12565815-12570190W	PB.7660.2,PB.7660.1
Chr7	Exon skipping	15340328	15340549	+	Chr7:15339013-15351133W	PB.7691.3,PB.7691.1/PB.7691.2
Chr7	Alternative 5' splice site	18562928	18562940	+	Chr7:18557897-18565199W	PB.7736.1,PB.7736.2
Chr7	Alternative 3' splice site	19285231	19285292	+	Chr7:19281736-19289780W	PB.7763.3,PB.7763.1
Chr7	Intron retention	22184500	22185517	+	Chr7:22184407-22186896W	PB.7821.1,PB.7821.2/PB.7821.3
Chr7	Intron retention	22691637	22691823	+	Chr7:22688866-22693316W	PB.7843.2,PB.7843.1
Chr7	Intron retention	23146352	23146440	+	Chr7:23145921-23149210W	PB.7862.4,PB.7862.1/PB.7862.2/PB.7862.5
Chr7	Alternative 3' splice site	23147199	23147219	+	Chr7:23145921-23149210W	PB.7862.5,PB.7862.1/PB.7862.2/PB.7862.4
Chr7	Alternative 3' splice site	23147471	23147486	+	Chr7:23145921-23149210W	PB.7862.5,PB.7862.1/PB.7862.2/PB.7862.4/PB.7862.6
Chr7	Alternative 3' splice site	23345158	23345589	+	Chr7:23344830-23348699W	PB.7872.2,PB.7872.1
Chr7	Alternative 3' splice site	23528314	23528317	+	Chr7:23527248-23535425W	PB.7881.1/PB.7881.3/PB.7881.4,PB.7881.2
Chr7	Intron retention	23530347	23530565	+	Chr7:23527248-23535425W	PB.7881.1,PB.7881.2/PB.7881.3/PB.7881.4
Chr7	Exon skipping	23532829	23532951	+	Chr7:23527248-23535425W	PB.7881.1/PB.7881.2/PB.7881.4,PB.7881.3
Chr7	Intron retention	23837832	23838329	+	Chr7:23833334-23840053W	PB.7897.2,PB.7897.1
Chr7	Intron retention	25437630	25438273	+	Chr7:25435753-25439364W	PB.7948.1,PB.7948.2
Chr7	Intron retention	25532704	25532766	+	Chr7:25530964-25534064W	PB.7951.3,PB.7951.2
Chr7	Intron retention	26230952	26232023	+	Chr7:26230673-26240863W	PB.7982.1,PB.7982.2
Chr7	Alternative 5' splice site	26233545	26233548	+	Chr7:26230673-26240863W	PB.7982.1/PB.7982.2,PB.7982.3
Chr7	Alternative 5' splice site	26233545	26233546	+	Chr7:26230673-26240863W	PB.7982.1/PB.7982.2,PB.7982.4
Chr7	Alternative 5' splice site	26233546	26233548	+	Chr7:26230673-26240863W	PB.7982.4,PB.7982.3
Chr7	Alternative 5' splice site	26234126	26234130	+	Chr7:26230673-26240863W	PB.7982.1/PB.7982.2/PB.7982.3,PB.7982.4
Chr7	Alternative 5' splice site	26239761	26239774	+	Chr7:26230673-26240863W	PB.7982.4,PB.7982.3
Chr7	Alternative 3' splice site	26426427	26426442	+	Chr7:26416979-26429289W	PB.7994.2,PB.7994.1
Chr7	Intron retention	27058842	27058876	+	Chr7:27055404-27059044W	PB.8019.2,PB.8019.1
Chr7	Intron retention	27616601	27616698	+	Chr7:27615638-27618638W	PB.8024.1,PB.8024.2
Chr7	Alternative 3' splice site	27721904	27721907	+	Chr7:27713361-27722659W	PB.8028.1,PB.8028.2
Chr7	Intron retention	28164492	28164620	+	Chr7:28164424-28169585W	PB.8047.1,PB.8047.2/PB.8047.3
Chr7	Alternative 3' splice site	28243686	28243693	+	Chr7:28240479-28245407W	PB.8049.2,PB.8049.1
Chr7	Alternative 3' splice site	28243863	28243871	+	Chr7:28240479-28245407W	PB.8049.1,PB.8049.2
Chr7	Exon skipping	28408889	28408964	+	Chr7:28402339-28409556W	PB.8053.2,PB.8053.1
Chr7	Alternative 3' splice site	28910761	28910773	+	Chr7:28909047-28914022W	PB.8074.2,PB.8074.1
Chr7	Intron retention	800957	800516	-	Chr7:799507-805198C	PB.7460.2,PB.7460.1/PB.7460.3/PB.7460.4
Chr7	Intron retention	3156000	3155721	-	Chr7:3153398-3157107C	PB.7515.1/PB.7515.2/PB.7515.3,PB.7515.4
Chr7	Intron retention	3272975	3272551	-	Chr7:3270387-3275949C	PB.7521.2,PB.7521.1/PB.7521.3
Chr7	Alternative 3' splice site	3564600	3564466	-	Chr7:3561191-3569183C	PB.7533.1,PB.7533.2
Chr7	Intron retention	4091089	4089996	-	Chr7:4089222-4092086C	PB.7550.2,PB.7550.1
Chr7	Intron retention	10820975	10820843	-	Chr7:10817329-10825076C	PB.7648.1,PB.7648.2/PB.7648.3
Chr7	Alternative 5' splice site	11866824	11866818	-	Chr7:11865542-11874280C	PB.7655.1,PB.7655.2
Chr7	Exon skipping	12655795	12655709	-	Chr7:12652962-12656519C	PB.7662.4,PB.7662.1
Chr7	Exon skipping	12655795	12655218	-	Chr7:12652962-12656519C	PB.7662.2/PB.7662.3,PB.7662.1
Chr7	Exon skipping	12655322	12655218	-	Chr7:12652962-12656519C	PB.7662.2/PB.7662.3,PB.7662.4
Chr7	Intron retention	12802115	12801684	-	Chr7:12795011-12803568C	PB.7667.2,PB.7667.1/PB.7667.3
Chr7	Intron retention	12812958	12812878	-	Chr7:12811615-12819364C	PB.7668.2,PB.7668.1/PB.7668.3
Chr7	Alternative 5' splice site	12921016	12920794	-	Chr7:12916737-12924254C	PB.7669.3,PB.7669.4/PB.7669.6/PB.7669.8
Chr7	Intron retention	12921016	12920476	-	Chr7:12916737-12924254C	PB.7669.1/PB.7669.7,PB.7669.3
Chr7	Intron retention	12920794	12920476	-	Chr7:12916737-12924254C	PB.7669.1/PB.7669.7,PB.7669.4/PB.7669.6/PB.7669.8
Chr7	Alternative 3' splice site	18254487	18254470	-	Chr7:18253683-18257953C	PB.7733.1,PB.7733.2
Chr7	Intron retention	22832563	22832484	-	Chr7:22831858-22837308C	PB.7848.2,PB.7848.1
Chr7	Intron retention	24657361	24657281	-	Chr7:24654911-24659846C	PB.7922.2,PB.7922.1
Chr7	Intron retention	26710544	26709381	-	Chr7:26708388-26711867C	PB.8004.2,PB.8004.1
Chr7	Intron retention	27891216	27891096	-	Chr7:27890236-27891312C	PB.8033.3,PB.8033.4
Chr7	Intron retention	27904636	27904574	-	Chr7:27902952-27907726C	PB.8034.1,PB.8034.2
Chr7	Intron retention	28274084	28274009	-	Chr7:28272268-28276618C	PB.8050.3,PB.8050.1/PB.8050.2/PB.8050.4
Chr7	Alternative 5' splice site	28474018	28474007	-	Chr7:28469755-28474182C	PB.8058.4,PB.8058.1/PB.8058.3
Chr7	Exon skipping	28470952	28470621	-	Chr7:28469755-28474182C	PB.8058.2/PB.8058.6,PB.8058.4
Chr7	Intron retention	28470621	28470402	-	Chr7:28469755-28474182C	PB.8058.1/PB.8058.3/PB.8058.5,PB.8058.4
Chr7	Intron retention	28470017	28469901	-	Chr7:28469755-28474182C	PB.8058.4,PB.8058.3
Chr7	Alternative 5' splice site	28929713	28929684	-	Chr7:28928655-28932827C	PB.8075.2,PB.8075.1/PB.8075.4
Chr7	Intron retention	28929713	28929528	-	Chr7:28928655-28932827C	PB.8075.3,PB.8075.2
Chr7	Alternative 5' splice site	29272842	29272803	-	Chr7:29271580-29277792C	PB.8090.2,PB.8090.1
Chr7	Intron retention	29440085	29440017	-	Chr7:29435858-29440152C	PB.8096.1,PB.8096.2
Chr7	Intron retention	29440098	29439964	-	Chr7:29435858-29440152C	PB.8096.1,PB.8096.3
Chr7	Intron retention	29436712	29436619	-	Chr7:29435858-29440152C	PB.8096.4,PB.8096.1/PB.8096.2/PB.8096.3
Chr7	Intron retention	29515251	29515151	-	Chr7:29512319-29516375C	PB.8101.1,PB.8101.2
Chr7	Intron retention	29585446	29585087	-	Chr7:29584015-29586299C	PB.8108.4,PB.8108.1/PB.8108.5/PB.8108.7
Chr7	Intron retention	29584833	29584716	-	Chr7:29584015-29586299C	PB.8108.5,PB.8108.1/PB.8108.4/PB.8108.7
Chr8	Alternative 3' splice site	59591	59632	+	Chr8:58580-63382W	PB.8114.2,PB.8114.1
Chr8	Exon skipping	228560	228761	+	Chr8:228207-232372W	PB.8128.2,PB.8128.1
Chr8	Intron retention	553360	554119	+	Chr8:551545-556942W	PB.8148.2,PB.8148.1
Chr8	Intron retention	1051875	1052837	+	Chr8:1050618-1054938W	PB.8162.1,PB.8162.2
Chr8	Alternative 3' splice site	1667446	1667466	+	Chr8:1666651-1672045W	PB.8182.1/PB.8182.2,PB.8182.3
Chr8	Intron retention	1669779	1669864	+	Chr8:1666651-1672045W	PB.8182.2,PB.8182.1/PB.8182.3
Chr8	Alternative 3' splice site	3018756	3018763	+	Chr8:3017359-3022062W	PB.8213.1,PB.8213.2
Chr8	Exon skipping	3361296	3361701	+	Chr8:3360851-3373416W	PB.8224.11,PB.8224.1/PB.8224.10/PB.8224.2/PB.8224.5/PB.8224.6/PB.8224.7
Chr8	Alternative 5' splice site	3362364	3362427	+	Chr8:3360851-3373416W	PB.8224.10/PB.8224.5/PB.8224.6,PB.8224.7
Chr8	Alternative 5' splice site	3362364	3362430	+	Chr8:3360851-3373416W	PB.8224.10/PB.8224.5/PB.8224.6,PB.8224.2
Chr8	Alternative 5' splice site	3362427	3362430	+	Chr8:3360851-3373416W	PB.8224.7,PB.8224.2
Chr8	Exon skipping	3362333	3362364	+	Chr8:3360851-3373416W	PB.8224.8,PB.8224.10/PB.8224.5/PB.8224.6
Chr8	Exon skipping	3362333	3362427	+	Chr8:3360851-3373416W	PB.8224.8,PB.8224.7
Chr8	Exon skipping	3362333	3362430	+	Chr8:3360851-3373416W	PB.8224.8,PB.8224.2
Chr8	Exon skipping	3362505	3362537	+	Chr8:3360851-3373416W	PB.8224.3,PB.8224.8
Chr8	Exon skipping	3362333	3362537	+	Chr8:3360851-3373416W	PB.8224.3,PB.8224.10/PB.8224.5/PB.8224.6
Chr8	Exon skipping	3362333	3362537	+	Chr8:3360851-3373416W	PB.8224.3,PB.8224.7
Chr8	Exon skipping	3362333	3362537	+	Chr8:3360851-3373416W	PB.8224.3,PB.8224.2
Chr8	Alternative 3' splice site	3365888	3365914	+	Chr8:3360851-3373416W	PB.8224.10/PB.8224.11/PB.8224.12,PB.8224.13/PB.8224.2/PB.8224.3/PB.8224.5/PB.8224.6/PB.8224.7/PB.8224.8/PB.8224.9
Chr8	Alternative 5' splice site	3366235	3366239	+	Chr8:3360851-3373416W	PB.8224.5,PB.8224.9
Chr8	Alternative 3' splice site	3366397	3366434	+	Chr8:3360851-3373416W	PB.8224.10/PB.8224.11/PB.8224.13/PB.8224.14/PB.8224.6/PB.8224.7/PB.8224.8,PB.8224.15
Chr8	Alternative 3' splice site	3366381	3366397	+	Chr8:3360851-3373416W	PB.8224.5,PB.8224.10/PB.8224.11/PB.8224.13/PB.8224.14/PB.8224.6/PB.8224.7/PB.8224.8
Chr8	Alternative 3' splice site	3366381	3366434	+	Chr8:3360851-3373416W	PB.8224.5,PB.8224.15
Chr8	Intron retention	3366239	3366381	+	Chr8:3360851-3373416W	PB.8224.1/PB.8224.12/PB.8224.2/PB.8224.3,PB.8224.9
Chr8	Intron retention	3366235	3366397	+	Chr8:3360851-3373416W	PB.8224.1/PB.8224.12/PB.8224.2/PB.8224.3,PB.8224.10/PB.8224.11/PB.8224.13/PB.8224.6/PB.8224.7/PB.8224.8
Chr8	Intron retention	3366235	3366434	+	Chr8:3360851-3373416W	PB.8224.1/PB.8224.12/PB.8224.2/PB.8224.3,PB.8224.15
Chr8	Intron retention	3366235	3366381	+	Chr8:3360851-3373416W	PB.8224.1/PB.8224.12/PB.8224.2/PB.8224.3,PB.8224.5
Chr8	Alternative 3' splice site	3371281	3371299	+	Chr8:3360851-3373416W	PB.8224.17,PB.8224.1/PB.8224.10/PB.8224.11/PB.8224.12/PB.8224.13/PB.8224.14/PB.8224.15/PB.8224.2/PB.8224.3/PB.8224.5/PB.8224.6/PB.8224.7/PB.8224.8/PB.8224.9
Chr8	Exon skipping	4240647	4240752	+	Chr8:4237024-4242572W	PB.8244.1/PB.8244.2,PB.8244.3
Chr8	Intron retention	4241200	4241708	+	Chr8:4237024-4242572W	PB.8244.2/PB.8244.3,PB.8244.1
Chr8	Intron retention	6035541	6035609	+	Chr8:6032299-6039134W	PB.8282.2,PB.8282.1
Chr8	Alternative 3' splice site	6599015	6599159	+	Chr8:6598255-6603375W	PB.8293.1,PB.8293.2
Chr8	Intron retention	7583979	7583990	+	Chr8:7583523-7588301W	PB.8300.2,PB.8300.1
Chr8	Alternative 3' splice site	7608701	7608714	+	Chr8:7605607-7610236W	PB.8302.2,PB.8302.1
Chr8	Intron retention	14357234	14357340	+	Chr8:14356981-14360826W	PB.8385.2,PB.8385.1/PB.8385.3
Chr8	Intron retention	14359312	14359452	+	Chr8:14356981-14360826W	PB.8385.1,PB.8385.2/PB.8385.3
Chr8	Intron retention	16983007	16984656	+	Chr8:16982282-16985273W	PB.8410.3,PB.8410.1
Chr8	Alternative 3' splice site	18477534	18477545	+	Chr8:18474205-18480759W	PB.8425.1,PB.8425.2
Chr8	Alternative 3' splice site	19096308	19096315	+	Chr8:19094825-19098940W	PB.8430.1/PB.8430.3,PB.8430.2
Chr8	Intron retention	20131131	20131290	+	Chr8:20129510-20133673W	PB.8443.3,PB.8443.1/PB.8443.2
Chr8	Intron retention	21446903	21447010	+	Chr8:21445978-21450791W	PB.8466.2,PB.8466.1
Chr8	Alternative 3' splice site	22890151	22890158	+	Chr8:22887574-22892689W	PB.8493.2,PB.8493.1
Chr8	Alternative 3' splice site	23831890	23831896	+	Chr8:23829310-23833562W	PB.8511.1,PB.8511.2
Chr8	Intron retention	24187178	24187819	+	Chr8:24186670-24189465W	PB.8520.3,PB.8520.1/PB.8520.2
Chr8	Intron retention	24563498	24563616	+	Chr8:24560915-24566094W	PB.8530.2,PB.8530.1
Chr8	Exon skipping	24689644	24689814	+	Chr8:24685260-24694482W	PB.8534.1,PB.8534.2
Chr8	Exon skipping	26786040	26786271	+	Chr8:26785445-26791064W	PB.8598.2,PB.8598.1/PB.8598.3
Chr8	Exon skipping	26789865	26790012	+	Chr8:26785445-26791064W	PB.8598.3,PB.8598.1/PB.8598.2
Chr8	Intron retention	27303316	27303863	+	Chr8:27302266-27306863W	PB.8616.1,PB.8616.3/PB.8616.4
Chr8	Alternative 5' splice site	27706644	27706650	+	Chr8:27703344-27707240W	PB.8631.1/PB.8631.3,PB.8631.2
Chr8	Intron retention	27772764	27773058	+	Chr8:27761911-27794171W	PB.8634.3,PB.8634.2/PB.8634.4/PB.8634.6
Chr8	Intron retention	27791928	27792013	+	Chr8:27761911-27794171W	PB.8634.8,PB.8634.5/PB.8634.7/PB.8634.9
Chr8	Alternative 5' splice site	27966458	27966467	+	Chr8:27966244-27968004W	PB.8649.2,PB.8649.1
Chr8	Intron retention	28070192	28070337	+	Chr8:28069291-28074603W	PB.8656.1,PB.8656.2
Chr8	Alternative 3' splice site	28372388	28372393	+	Chr8:28370520-28375953W	PB.8674.1,PB.8674.3
Chr8	Intron retention	28371951	28372388	+	Chr8:28370520-28375953W	PB.8674.2/PB.8674.4,PB.8674.1
Chr8	Intron retention	28371951	28372393	+	Chr8:28370520-28375953W	PB.8674.2/PB.8674.4,PB.8674.3
Chr8	Intron retention	28374073	28374398	+	Chr8:28370520-28375953W	PB.8674.2,PB.8674.1/PB.8674.3/PB.8674.4
Chr8	Intron retention	28398056	28398442	+	Chr8:28393985-28399085W	PB.8676.2,PB.8676.1/PB.8676.3/PB.8676.4
Chr8	Alternative 5' splice site	27872	27868	-	Chr8:26246-33536C	PB.8113.2,PB.8113.1
Chr8	Intron retention	91334	91244	-	Chr8:87758-91953C	PB.8118.2/PB.8118.3,PB.8118.1
Chr8	Intron retention	91333	91219	-	Chr8:87758-91953C	PB.8118.2/PB.8118.3,PB.8118.4
Chr8	Intron retention	90829	90692	-	Chr8:87758-91953C	PB.8118.3,PB.8118.1/PB.8118.2/PB.8118.4
Chr8	Exon skipping	119215	119123	-	Chr8:111607-121100C	PB.8121.4,PB.8121.1/PB.8121.2/PB.8121.3
Chr8	Intron retention	2213659	2213476	-	Chr8:2210027-2213892C	PB.8197.2,PB.8197.1
Chr8	Intron retention	2311798	2311440	-	Chr8:2309187-2315263C	PB.8199.5,PB.8199.1/PB.8199.2/PB.8199.3/PB.8199.4/PB.8199.6/PB.8199.7
Chr8	Intron retention	2310938	2310687	-	Chr8:2309187-2315263C	PB.8199.3,PB.8199.1/PB.8199.2/PB.8199.5/PB.8199.6/PB.8199.7
Chr8	Alternative 5' splice site	2508566	2508411	-	Chr8:2507285-2514518C	PB.8202.2,PB.8202.1
Chr8	Intron retention	3340883	3340571	-	Chr8:3337756-3340918C	PB.8223.1/PB.8223.3,PB.8223.2
Chr8	Alternative 3' splice site	4501736	4501730	-	Chr8:4496748-4502238C	PB.8247.2/PB.8247.4,PB.8247.3
Chr8	Alternative 3' splice site	4604301	4604271	-	Chr8:4599738-4604714C	PB.8253.2,PB.8253.1
Chr8	Intron retention	4679610	4678732	-	Chr8:4676290-4681829C	PB.8254.1,PB.8254.2
Chr8	Intron retention	5422814	5422789	-	Chr8:5422250-5426677C	PB.8269.2,PB.8269.1
Chr8	Exon skipping	5522959	5522361	-	Chr8:5519885-5523422C	PB.8270.2,PB.8270.1
Chr8	Alternative 5' splice site	5812760	5812721	-	Chr8:5811260-5816129C	PB.8279.1,PB.8279.2
Chr8	Alternative 5' splice site	7347386	7347362	-	Chr8:7338938-7348122C	PB.8296.4/PB.8296.7,PB.8296.3
Chr8	Alternative 3' splice site	7347195	7347194	-	Chr8:7338938-7348122C	PB.8296.2,PB.8296.3
Chr8	Alternative 3' splice site	7347195	7347189	-	Chr8:7338938-7348122C	PB.8296.2,PB.8296.5
Chr8	Alternative 3' splice site	7347194	7347189	-	Chr8:7338938-7348122C	PB.8296.3,PB.8296.5
Chr8	Intron retention	7347386	7347194	-	Chr8:7338938-7348122C	PB.8296.6,PB.8296.4/PB.8296.7
Chr8	Intron retention	7347362	7347195	-	Chr8:7338938-7348122C	PB.8296.6,PB.8296.2
Chr8	Intron retention	7347362	7347194	-	Chr8:7338938-7348122C	PB.8296.6,PB.8296.3
Chr8	Intron retention	7347362	7347189	-	Chr8:7338938-7348122C	PB.8296.6,PB.8296.5
Chr8	Alternative 3' splice site	7562216	7562171	-	Chr8:7559151-7563162C	PB.8299.1/PB.8299.2/PB.8299.4,PB.8299.3
Chr8	Alternative 3' splice site	11875168	11875132	-	Chr8:11869970-11879569C	PB.8358.1/PB.8358.3,PB.8358.2/PB.8358.4
Chr8	Intron retention	11875252	11874222	-	Chr8:11869970-11879569C	PB.8358.5,PB.8358.1/PB.8358.3
Chr8	Intron retention	11875252	11874222	-	Chr8:11869970-11879569C	PB.8358.5,PB.8358.2/PB.8358.4
Chr8	Exon skipping	11872573	11872220	-	Chr8:11869970-11879569C	PB.8358.1/PB.8358.4/PB.8358.5,PB.8358.2/PB.8358.3
Chr8	Alternative 3' splice site	14729425	14729403	-	Chr8:14724884-14732048C	PB.8389.1,PB.8389.2
Chr8	Intron retention	14727043	14726949	-	Chr8:14724884-14732048C	PB.8389.1,PB.8389.2
Chr8	Alternative 3' splice site	17220705	17220649	-	Chr8:17214431-17221204C	PB.8413.2,PB.8413.1/PB.8413.3
Chr8	Alternative 3' splice site	20814540	20814519	-	Chr8:20812581-20815627C	PB.8454.2,PB.8454.1
Chr8	Alternative 3' splice site	22046535	22046524	-	Chr8:22038801-22048472C	PB.8479.1,PB.8479.3
Chr8	Alternative 5' splice site	22988305	22988281	-	Chr8:22987118-22994971C	PB.8495.2/PB.8495.4,PB.8495.1/PB.8495.3
Chr8	Alternative 3' splice site	24596952	24594766	-	Chr8:24593141-24597530C	PB.8533.4,PB.8533.5
Chr8	Intron retention	24594394	24594161	-	Chr8:24593141-24597530C	PB.8533.1/PB.8533.3,PB.8533.2/PB.8533.4/PB.8533.5
Chr8	Exon skipping	24721321	24721279	-	Chr8:24719093-24723553C	PB.8537.1/PB.8537.2/PB.8537.5/PB.8537.6,PB.8537.4
Chr8	Intron retention	26556589	26555339	-	Chr8:26554179-26557021C	PB.8590.3,PB.8590.1/PB.8590.2
Chr8	Alternative 3' splice site	27212816	27212810	-	Chr8:27210421-27217038C	PB.8613.1/PB.8613.3,PB.8613.2
Chr8	Alternative 3' splice site	27436148	27436145	-	Chr8:27435130-27442736C	PB.8621.3,PB.8621.4
Chr8	Intron retention	27557141	27556569	-	Chr8:27555364-27559325C	PB.8626.2,PB.8626.1
Chr8	Alternative 3' splice site	28125605	28125602	-	Chr8:28123298-28126626C	PB.8659.5,PB.8659.2/PB.8659.6
Chr8	Intron retention	28123791	28123685	-	Chr8:28123298-28126626C	PB.8659.2,PB.8659.5
Chr8	Intron retention	28253957	28253815	-	Chr8:28250427-28254000C	PB.8666.1,PB.8666.2
Chr8	Intron retention	28253954	28253820	-	Chr8:28250427-28254000C	PB.8666.1,PB.8666.3
Chr9	Intron retention	2598032	2600010	+	Chr9:2597240-2600726W	PB.8714.1,PB.8714.2
Chr9	Intron retention	3856600	3856790	+	Chr9:3855254-3862985W	PB.8729.1,PB.8729.2
Chr9	Alternative 3' splice site	6017766	6017899	+	Chr9:6016350-6020377W	PB.8758.1,PB.8758.2/PB.8758.4/PB.8758.6
Chr9	Intron retention	6017199	6017766	+	Chr9:6016350-6020377W	PB.8758.5,PB.8758.1
Chr9	Intron retention	6017199	6017899	+	Chr9:6016350-6020377W	PB.8758.5,PB.8758.4/PB.8758.6
Chr9	Alternative 3' splice site	6016759	6016771	+	Chr9:6016350-6020377W	PB.8758.8,PB.8758.5
Chr9	Intron retention	6016489	6016759	+	Chr9:6016350-6020377W	PB.8758.7,PB.8758.8
Chr9	Intron retention	6016489	6017899	+	Chr9:6016350-6020377W	PB.8758.7,PB.8758.6
Chr9	Alternative 3' splice site	10448697	10448700	+	Chr9:10448423-10452752W	PB.8791.1,PB.8791.2
Chr9	Alternative 3' splice site	14681719	14681723	+	Chr9:14680793-14684469W	PB.8856.1,PB.8856.2
Chr9	Intron retention	14682442	14683195	+	Chr9:14680793-14684469W	PB.8856.1,PB.8856.2
Chr9	Intron retention	16050836	16050925	+	Chr9:16049138-16059334W	PB.8888.3,PB.8888.2
Chr9	Alternative 5' splice site	16050990	16050994	+	Chr9:16049138-16059334W	PB.8888.1,PB.8888.2
Chr9	Intron retention	16472541	16473053	+	Chr9:16470972-16474580W	PB.8905.3,PB.8905.1
Chr9	Intron retention	16472541	16473381	+	Chr9:16470972-16474580W	PB.8905.2,PB.8905.1
Chr9	Intron retention	16473148	16473381	+	Chr9:16470972-16474580W	PB.8905.2,PB.8905.3
Chr9	Alternative 3' splice site	19574328	19574352	+	Chr9:19569991-19575607W	PB.9004.3,PB.9004.1/PB.9004.2
Chr9	Intron retention	19863395	19863525	+	Chr9:19861236-19866299W	PB.9017.2,PB.9017.1/PB.9017.3
Chr9	Intron retention	19865250	19865761	+	Chr9:19861236-19866299W	PB.9017.2/PB.9017.3,PB.9017.1
Chr9	Intron retention	19961349	19961902	+	Chr9:19961101-19964228W	PB.9023.1,PB.9023.2/PB.9023.3
Chr9	Alternative 5' splice site	20236726	20236756	+	Chr9:20236411-20240615W	PB.9035.4,PB.9035.3
Chr9	Intron retention	20238932	20239318	+	Chr9:20236411-20240615W	PB.9035.2,PB.9035.1/PB.9035.3
Chr9	Intron retention	20368799	20368908	+	Chr9:20367500-20371291W	PB.9041.2,PB.9041.1/PB.9041.3
Chr9	Intron retention	21920212	21920316	+	Chr9:21917324-21922431W	PB.9094.2,PB.9094.1/PB.9094.3
Chr9	Intron retention	21932625	21933204	+	Chr9:21931001-21934910W	PB.9095.2,PB.9095.1
Chr9	Intron retention	22181856	22182733	+	Chr9:22181621-22183208W	PB.9109.1,PB.9109.2
Chr9	Intron retention	22195268	22195478	+	Chr9:22192646-22197258W	PB.9110.1,PB.9110.2
Chr9	Alternative 5' splice site	22937066	22937072	+	Chr9:22933970-22939021W	PB.9155.2,PB.9155.1/PB.9155.5
Chr9	Intron retention	859311	857851	-	Chr9:854827-860511C	PB.8687.2,PB.8687.1
Chr9	Intron retention	1224420	1223852	-	Chr9:1221121-1224774C	PB.8694.2/PB.8694.3,PB.8694.1
Chr9	Alternative 3' splice site	3664907	3664906	-	Chr9:3660473-3675460C	PB.8726.4,PB.8726.2
Chr9	Intron retention	4539924	4537592	-	Chr9:4535278-4543613C	PB.8741.1,PB.8741.2
Chr9	Intron retention	5848930	5848833	-	Chr9:5847664-5851796C	PB.8755.1,PB.8755.2
Chr9	Intron retention	7249702	7249611	-	Chr9:7245326-7249723C	PB.8766.1/PB.8766.3,PB.8766.2
Chr9	Alternative 3' splice site	10266380	10266292	-	Chr9:10260263-10267364C	PB.8787.1,PB.8787.2
Chr9	Alternative 3' splice site	10265093	10265015	-	Chr9:10260263-10267364C	PB.8787.1,PB.8787.2
Chr9	Intron retention	11922769	11922624	-	Chr9:11920506-11926069C	PB.8812.3,PB.8812.1/PB.8812.2/PB.8812.4
Chr9	Alternative 3' splice site	12433360	12433348	-	Chr9:12431019-12434578C	PB.8821.1,PB.8821.2
Chr9	Alternative 5' splice site	14875299	14875277	-	Chr9:14871060-14878157C	PB.8861.1,PB.8861.2
Chr9	Alternative 3' splice site	14874600	14874586	-	Chr9:14871060-14878157C	PB.8861.2,PB.8861.1
Chr9	Intron retention	16995232	16994761	-	Chr9:16991806-16996020C	PB.8920.1/PB.8920.2/PB.8920.4,PB.8920.3
Chr9	Intron retention	16993485	16993155	-	Chr9:16991806-16996020C	PB.8920.4,PB.8920.1/PB.8920.2/PB.8920.3
Chr9	Intron retention	17254346	17254202	-	Chr9:17252027-17255529C	PB.8927.2,PB.8927.1
Chr9	Alternative 3' splice site	19417806	19417800	-	Chr9:19415348-19418014C	PB.8995.2,PB.8995.1
Chr9	Intron retention	19885118	19885019	-	Chr9:19882650-19888234C	PB.9019.2/PB.9019.3,PB.9019.1/PB.9019.4
Chr9	Intron retention	19883875	19883591	-	Chr9:19882650-19888234C	PB.9019.3,PB.9019.1/PB.9019.4
Chr9	Intron retention	19884127	19883591	-	Chr9:19882650-19888234C	PB.9019.2,PB.9019.1/PB.9019.4
Chr9	Intron retention	19884127	19883989	-	Chr9:19882650-19888234C	PB.9019.2,PB.9019.3
Chr9	Intron retention	19902729	19902590	-	Chr9:19900690-19904520C	PB.9020.2,PB.9020.1/PB.9020.3/PB.9020.4
Chr9	Exon skipping	19901929	19901904	-	Chr9:19900690-19904520C	PB.9020.4,PB.9020.1/PB.9020.2
Chr9	Alternative 3' splice site	20247055	20247051	-	Chr9:20243653-20248513C	PB.9036.1,PB.9036.2
Chr9	Intron retention	20246509	20246429	-	Chr9:20243653-20248513C	PB.9036.2,PB.9036.1
Chr9	Intron retention	20538742	20538634	-	Chr9:20535210-20540247C	PB.9046.2,PB.9046.1/PB.9046.3
Chr9	Intron retention	20978161	20978012	-	Chr9:20976421-20980723C	PB.9062.2,PB.9062.1/PB.9062.3/PB.9062.4
Chr9	Intron retention	22253382	22253357	-	Chr9:22248955-22254409C	PB.9113.1/PB.9113.3,PB.9113.2
Chr9	Intron retention	22289007	22287636	-	Chr9:22287180-22291741C	PB.9119.1,PB.9119.2
ChrUn	Intron retention	623685	623569	-	ChrUn:621434-625278C	PB.9161.3/PB.9161.5,PB.9161.1/PB.9161.2/PB.9161.4
