# Supplementary material for: Full-length transcriptome reconstruction reveals genetic differences in hybrids of Oryza sativa and Oryza punctata with different ploidy and genome compositions
Source: BMC Plant Biol. 2022 Mar 21;22:131. doi: 10.1186/s12870-022-03502-2 (PMC8935693; doi:10.1186/s12870-022-03502-2)
Supplement: Supplementary file 4 — Additional file 4: Table S3. Functional annotation of transcripts in the polyadenylation events. [file 12870_2022_3502_MOESM4_ESM.xlsx]

## Sheet: F01
Table S3 Functional annotation of transcripts in the polyadenylation events
Gene	COG_class	COG_class_annotation	GO_annotation	KEGG_annotation	KEGG_pathway	KOG_class	KOG_class_annotation	Pfam_annotation	Swissprot_annotation	eggNOG_class	eggNOG_class_annotation	nr_annotation	strand	aligned reads	num sites	locations
LOC_OS01G21160	--	--	Molecular Function: alpha-ketoacid dehydrogenase activity (GO:0003826);; Molecular Function: dihydrolipoamide branched chain acyltransferase activity (GO:0004147);; Cellular Component: mitochondrion (GO:0005739);; Biological Process: coenzyme metabolic process (GO:0006732);; Biological Process: phosphorus metabolic process (GO:0006793);; Biological Process: nitrogen compound metabolic process (GO…	K09699|0|osa:4327289|Os01g0314100; K09699 2-oxoisovalerate dehydrogenase E2 component (dihydrolipoyl transacylase) [EC:2.3.1.168] (A)	ko00280:Valine, leucine and isoleucine degradation	[C]	Energy production and conversion	2-oxoacid dehydrogenases acyltransferase (catalytic domain);; Biotin-requiring enzyme;; e3 binding domain	Lipoamide acyltransferase component of branched-chain alpha-keto acid dehydrogenase complex, mitochondrial OS=Arabidopsis thaliana OX=3702 GN=BCE2 PE=1 SV=1	C	Energy production and conversion	PREDICTED: lipoamide acyltransferase component of branched-chain alpha-keto acid dehydrogenase complex, mitochondrial [Oryza sativa Japonica Group]	-	4	1	11804160
LOC_OS05G48980	--	--	Biological Process: cytokinesis (GO:0000910);; Molecular Function: DNA binding (GO:0003677);; Molecular Function: GTPase activity (GO:0003924);; Molecular Function: GTP binding (GO:0005525);; Cellular Component: nucleus (GO:0005634);; Cellular Component: vacuolar membrane (GO:0005774);; Cellular Component: Golgi apparatus (GO:0005794);; Cellular Component: cytosol (GO:0005829);; Cellular Componen…	K07904|5.19e-149|osa:4339623|Os05g0564400; K07904 Ras-related protein Rab-11A (A)	ko04144:Endocytosis	[U]	Intracellular trafficking, secretion, and vesicular transport	Ras family;; Ras of Complex, Roc, domain of DAPkinase;; ADP-ribosylation factor family;; 50S ribosome-binding GTPase	Ras-related protein RABA1f OS=Arabidopsis thaliana OX=3702 GN=RABA1F PE=2 SV=1	S	Function unknown	PREDICTED: ras-related protein RABA1f [Oryza sativa Japonica Group]	-	10	2	2809283428092890
LOC_OS04G08350	--	--	Molecular Function: cysteine synthase activity (GO:0004124);; Molecular Function: copper ion binding (GO:0005507);; Cellular Component: mitochondrion (GO:0005739);; Biological Process: glycolytic process (GO:0006096);; Biological Process: cysteine biosynthetic process from serine (GO:0006535);; Biological Process: phosphatidylinositol biosynthetic process (GO:0006661);; Biological Process: water …	K13034|0|osa:4335048|Os04g0165700; K13034 L-3-cyanoalanine synthase/ cysteine synthase [EC:2.5.1.47 4.4.1.9] (A)	ko00270:Cysteine and methionine metabolism;ko00460:Cyanoamino acid metabolism;ko00920:Sulfur metabolism;ko01200:Carbon metabolism;ko01230:Biosynthesis of amino acids	[E]	Amino acid transport and metabolism	Pyridoxal-phosphate dependent enzyme	L-3-cyanoalanine synthase 2, mitochondrial OS=Malus domestica OX=3750 GN=CAS2 PE=1 SV=1	E	Amino acid transport and metabolism	PREDICTED: bifunctional L-3-cyanoalanine synthase/cysteine synthase 2, mitochondrial isoform X1 [Oryza sativa Japonica Group]	-	4	1	4457457
LOC_OS06G43790	--	--	Molecular Function: nucleic acid binding (GO:0003676);; Cellular Component: nucleus (GO:0005634);; Biological Process: regulation of transcription, DNA-templated (GO:0006355);; Molecular Function: zinc ion binding (GO:0008270);; Biological Process: DNA mediated transformation (GO:0009294);; Biological Process: response to light stimulus (GO:0009416);; Cellular Component: membrane (GO:0016020);; B…	K03125|0|osa:9266475|Os06g0645800; K03125 transcription initiation factor TFIID subunit 1 (A)	ko03022:Basal transcription factors	[K]	Transcription	Protein of unknown function (DUF3591);; Bromodomain;; TATA box-binding protein binding;; Ubiquitin family;; Zinc knuckle	Transcription initiation factor TFIID subunit 1 OS=Oryza sativa subsp. japonica OX=39947 GN=TAF1 PE=2 SV=1	K	Transcription	hypothetical protein OsJ_22148 [Oryza sativa Japonica Group]	-	4	1	26360007
LOC_OS05G33290	--	--	Cellular Component: plastid (GO:0009536);;	--	--	--	--	Protein of unknown function (DUF3119)	--	S	Function unknown	PREDICTED: uncharacterized protein LOC4338730 [Oryza sativa Japonica Group]	-	7	2	1951000019509970
LOC_OS03G50885	--	--	Molecular Function: structural constituent of cytoskeleton (GO:0005200);; Molecular Function: protein binding (GO:0005515);; Molecular Function: ATP binding (GO:0005524);; Cellular Component: cell wall (GO:0005618);; Cellular Component: nucleolus (GO:0005730);; Cellular Component: mitochondrion (GO:0005739);; Cellular Component: cytosol (GO:0005829);; Cellular Component: cytoskeleton (GO:0005856)…	K10355|0|osa:4333919|Os03g0718100; K10355 actin, other eukaryote (A)	--	[Z]	Cytoskeleton	Actin	Actin-1 OS=Oryza sativa subsp. japonica OX=39947 GN=ACT1 PE=2 SV=1	Z	Cytoskeleton	PREDICTED: actin-1 [Oryza sativa Japonica Group]	+	47	3	2.90758e+23
LOC_OS12G25200	--	--	Molecular Function: voltage-gated chloride channel activity (GO:0005247);; Molecular Function: binding (GO:0005488);; Biological Process: chloride transport (GO:0006821);; Molecular Function: nitrate:proton symporter activity (GO:0009671);; Cellular Component: plant-type vacuole membrane (GO:0009705);; Biological Process: response to nitrate (GO:0010167);; Biological Process: nitrate transport (G…	K05016|0|osa:4352132|Os12g0438600; K05016 chloride channel 7 (A)	--	[P]	Inorganic ion transport and metabolism	Voltage gated chloride channel;; CBS domain	Chloride channel protein CLC-b OS=Arabidopsis thaliana OX=3702 GN=CLC-B PE=1 SV=1	P	Inorganic ion transport and metabolism	PREDICTED: chloride channel protein CLC-a [Oryza sativa Japonica Group]	-	3	1	14487419
LOC_OS03G58970	--	--	Cellular Component: cytosol (GO:0005829);; Cellular Component: plasma membrane (GO:0005886);; Biological Process: multicellular organismal development (GO:0007275);; Biological Process: single-organism cellular process (GO:0044763);; Biological Process: response to stimulus (GO:0050896);; Biological Process: biological regulation (GO:0065007);;	--	--	[U]	Intracellular trafficking, secretion, and vesicular transport	Exocyst component 84 C-terminal;; Vps51/Vps67;; COG (conserved oligomeric Golgi) complex component, COG2	Exocyst complex component EXO84B OS=Arabidopsis thaliana OX=3702 GN=EXO84B PE=1 SV=1	U	Intracellular trafficking, secretion, and vesicular transport	expressed protein (with alternative splicing) [Oryza sativa Japonica Group]	+	5	1	33585129
LOC_OS06G46890	--	--	Molecular Function: binding (GO:0005488);; Molecular Function: metal ion binding (GO:0046872);;	--	--	--	--	Zinc finger C-x8-C-x5-C-x3-H type (and similar)	Zinc finger CCCH domain-containing protein 13 OS=Oryza sativa subsp. japonica OX=39947 GN=Os02g0161200 PE=2 SV=1	S	Function unknown	PREDICTED: zinc finger CCCH domain-containing protein 13-like isoform X1 [Oryza sativa Japonica Group]	-	7	1	28458046
LOC_OS01G74280	--	--	Molecular Function: lipid transporter activity (GO:0005319);; Molecular Function: phospholipid binding (GO:0005543);; Cellular Component: chloroplast inner membrane (GO:0009706);; Biological Process: photosystem II assembly (GO:0010207);; Biological Process: intracellular lipid transport (GO:0032365);; Biological Process: primary metabolic process (GO:0044238);; Biological Process: organic substa…	--	--	--	--	MlaD protein	Protein TRIGALACTOSYLDIACYLGLYCEROL 2, chloroplastic OS=Arabidopsis thaliana OX=3702 GN=TGD2 PE=1 SV=1	Q	Secondary metabolites biosynthesis, transport and catabolism	PREDICTED: protein TRIGALACTOSYLDIACYLGLYCEROL 2, chloroplastic [Oryza sativa Japonica Group]	+	20	1	43043961
LOC_OS03G58430	--	--	Cellular Component: plastid small ribosomal subunit (GO:0000312);; Biological Process: RNA methylation (GO:0001510);; Molecular Function: RNA binding (GO:0003723);; Molecular Function: structural constituent of ribosome (GO:0003735);; Cellular Component: nucleolus (GO:0005730);; Cellular Component: vacuolar membrane (GO:0005774);; Cellular Component: Golgi apparatus (GO:0005794);; Cellular Compon…	K02958|7.62966e-92|osa:4334438|Os03g0798600; K02958 small subunit ribosomal protein S15e (A)	ko03010:Ribosome	[J]	Translation, ribosomal structure and biogenesis	Ribosomal protein S19	40S ribosomal protein S15 OS=Oryza sativa subsp. japonica OX=39947 GN=RPS15 PE=2 SV=2	J	Translation, ribosomal structure and biogenesis	hypothetical protein OsI_13912 [Oryza sativa Indica Group]	-	4	1	33290884
LOC_OS04G40300	--	--	Molecular Function: protein-glutamine gamma-glutamyltransferase activity (GO:0003810);; Cellular Component: mitochondrion (GO:0005739);;	--	--	--	--	--	Protein FLX-like 2 OS=Arabidopsis thaliana OX=3702 GN=FLXL2 PE=1 SV=1	S	Function unknown	PREDICTED: protein FLX-like 2 [Oryza sativa Japonica Group]	-	7	2	2396009223960210
LOC_OS08G35710	--	--	Cellular Component: cytoplasmic membrane-bounded vesicle (GO:0016023);;	--	--	--	--	--	--	S	Function unknown	hypothetical protein OsI_29480 [Oryza sativa Indica Group]	-	31	3	2.25301e+23
LOC_OS09G31120	--	--	Molecular Function: calmodulin binding (GO:0005516);; Cellular Component: nucleus (GO:0005634);; Cellular Component: plasma membrane (GO:0005886);; Biological Process: iron ion transport (GO:0006826);; Biological Process: response to abscisic acid (GO:0009737);; Biological Process: abscisic acid-activated signaling pathway (GO:0009738);; Biological Process: blue light signaling pathway (GO:000978…	K06911|0|osa:4347417|Os09g0484800; K06911 (A)	--	--	--	Pirin C-terminal cupin domain;; Pirin	Pirin-like protein At1g50590 OS=Arabidopsis thaliana OX=3702 GN=At1g50590 PE=2 SV=1	S	Function unknown	PREDICTED: pirin-like protein [Oryza sativa Japonica Group]	+	11	2	1871008518710330
LOC_OS06G45660	--	--	Molecular Function: catalytic activity (GO:0003824);; Molecular Function: protein kinase C binding (GO:0005080);; Cellular Component: mitochondrion (GO:0005739);; Biological Process: metabolic process (GO:0008152);; Molecular Function: zinc ion binding (GO:0008270);; Cellular Component: chloroplast (GO:0009507);;	--	--	[T]	Signal transduction mechanisms	HIT domain;; Scavenger mRNA decapping enzyme C-term binding	14 kDa zinc-binding protein OS=Zea mays OX=4577 GN=ZBP14 PE=1 SV=1	FG	--	hypothetical protein OsI_24044 [Oryza sativa Indica Group]	+	3	1	27658888
LOC_OS03G42750	--	--	Cellular Component: exocyst (GO:0000145);; Cellular Component: cytosol (GO:0005829);; Cellular Component: plasma membrane (GO:0005886);;	--	--	[U]	Intracellular trafficking, secretion, and vesicular transport	Exocyst complex component Sec3;; Exocyst complex component SEC3 N-terminal PIP2 binding PH;; Vps52 / Sac2 family	Exocyst complex component SEC3A OS=Arabidopsis thaliana OX=3702 GN=SEC3A PE=1 SV=1	S	Function unknown	PREDICTED: exocyst complex component SEC3A [Oryza sativa Japonica Group]	-	3	1	23797195
LOC_OS07G09600	--	--	Cellular Component: endosome (GO:0005768);; Cellular Component: vacuolar membrane (GO:0005774);; Cellular Component: endoplasmic reticulum (GO:0005783);; Cellular Component: Golgi apparatus (GO:0005794);; Cellular Component: plasma membrane (GO:0005886);; Biological Process: protein targeting to vacuole (GO:0006623);; Biological Process: vacuole organization (GO:0007033);; Cellular Component: cel…	K08511|3.10085e-140|tcc:TCM_020369|Vesicle-associated membrane protein 726 isoform 1; K08511 vesicle-associated membrane protein 72 (A)	--	[U]	Intracellular trafficking, secretion, and vesicular transport	Synaptobrevin;; Regulated-SNARE-like domain	Vesicle-associated membrane protein 721 OS=Arabidopsis thaliana OX=3702 GN=VAMP721 PE=2 SV=1	U	Intracellular trafficking, secretion, and vesicular transport	PREDICTED: putative vesicle-associated membrane protein 726 [Theobroma cacao]	+	35	3	5.09939e+20
LOC_OS06G16330	--	--	Biological Process: polysaccharide biosynthetic process (GO:0000271);; Molecular Function: peptide receptor activity (GO:0001653);; Molecular Function: protein kinase activity (GO:0004672);; Molecular Function: protein serine/threonine kinase activity (GO:0004674);; Molecular Function: protein tyrosine kinase activity (GO:0004713);; Molecular Function: ATP binding (GO:0005524);; Cellular Componen…	--	--	--	--	Protein tyrosine kinase;; Protein kinase domain;; Leucine rich repeat N-terminal domain;; Leucine Rich repeats (2 copies);; Leucine rich repeat;; Leucine Rich Repeat	LRR receptor kinase SERL2 OS=Oryza sativa subsp. japonica OX=39947 GN=SERL2 PE=1 SV=1	T	Signal transduction mechanisms	PREDICTED: protein NSP-INTERACTING KINASE 1 [Oryza sativa Japonica Group]	+	9	1	9323921
LOC_OS01G52770	--	--	Biological Process: very long-chain fatty acid metabolic process (GO:0000038);; Molecular Function: carboxylic ester hydrolase activity (GO:0004091);; Cellular Component: extracellular space (GO:0005615);; Cellular Component: cell wall (GO:0005618);; Cellular Component: nucleus (GO:0005634);; Biological Process: lipid metabolic process (GO:0006629);; Biological Process: water transport (GO:000683…	--	--	--	--	GDSL-like Lipase/Acylhydrolase	GDSL esterase/lipase At5g45670 OS=Arabidopsis thaliana OX=3702 GN=At5g45670 PE=2 SV=1	S	Function unknown	PREDICTED: GDSL esterase/lipase At5g45670 [Oryza sativa Japonica Group]	+	18	3	3.0364e+23
LOC_OS03G62500	--	--	Molecular Function: protein serine/threonine kinase activity (GO:0004674);; Molecular Function: MAP kinase activity (GO:0004707);; Molecular Function: ubiquitin-protein transferase activity (GO:0004842);; Molecular Function: protein binding (GO:0005515);; Molecular Function: ATP binding (GO:0005524);; Cellular Component: nucleus (GO:0005634);; Cellular Component: trans-Golgi network (GO:0005802);…	K00924|0|osa:4334738|Os03g0841800; K00924 [EC:2.7.1.-] (A)	--	[G]	Carbohydrate transport and metabolism	Protein kinase domain;; Protein tyrosine kinase	Shaggy-related protein kinase kappa OS=Arabidopsis thaliana OX=3702 GN=ASK10 PE=2 SV=2	T	Signal transduction mechanisms	PREDICTED: shaggy-related protein kinase kappa isoform X1 [Oryza sativa Japonica Group]	-	6	1	35385942
LOC_OS01G68700	--	--	Molecular Function: DNA binding (GO:0003677);; Molecular Function: sequence-specific DNA binding transcription factor activity (GO:0003700);; Cellular Component: nucleus (GO:0005634);; Biological Process: regulation of transcription, DNA-templated (GO:0006355);; Biological Process: gibberellic acid mediated signaling pathway (GO:0009740);; Biological Process: positive regulation of flower develop…	--	--	--	--	Helix-loop-helix DNA-binding domain	Transcription factor bHLH62 OS=Arabidopsis thaliana OX=3702 GN=BHLH62 PE=2 SV=1	K	Transcription	PREDICTED: transcription factor bHLH77 isoform X1 [Oryza sativa Japonica Group]	-	11	1	39894690
LOC_OS01G62040	--	--	Biological Process: mitotic cell cycle (GO:0000278);; Biological Process: karyogamy (GO:0000741);; Biological Process: RNA methylation (GO:0001510);; Molecular Function: protein binding (GO:0005515);; Molecular Function: ATP binding (GO:0005524);; Cellular Component: nucleolus (GO:0005730);; Cellular Component: cytosol (GO:0005829);; Biological Process: gluconeogenesis (GO:0006094);; Biological P…	K04499|0|osa:4327368|Os01g0837500; K04499 RuvB-like protein 1 (pontin 52) (A)	--	[L]	Replication, recombination and repair	TIP49 C-terminus;; ATPase family associated with various cellular activities (AAA);; Holliday junction DNA helicase ruvB N-terminus	RuvB-like protein 1 OS=Arabidopsis thaliana OX=3702 GN=RIN1 PE=1 SV=1	K	Transcription	PREDICTED: ruvB-like protein 1 [Oryza sativa Japonica Group]	+	10	3	3.59082e+23
LOC_OS06G45090	--	--	Cellular Component: mitochondrion (GO:0005739);;	--	--	--	--	--	--	S	Function unknown	PREDICTED: uncharacterized protein LOC9271699 [Oryza sativa Japonica Group]	+	60	4	2.72752e+31
LOC_OS11G04104	--	--	Cellular Component: plasma membrane (GO:0005886);; Biological Process: response to water deprivation (GO:0009414);; Biological Process: response to nematode (GO:0009624);; Biological Process: gravitropism (GO:0009630);; Cellular Component: plant-type vacuole membrane (GO:0009705);; Biological Process: response to zinc ion (GO:0010043);; Biological Process: basipetal auxin transport (GO:0010540);;…	--	--	[R]	General function prediction only	Major Facilitator Superfamily;; Sugar (and other) transporter	Protein ZINC INDUCED FACILITATOR-LIKE 1 OS=Arabidopsis thaliana OX=3702 GN=ZIFL1 PE=2 SV=1	G	Carbohydrate transport and metabolism	PREDICTED: protein ZINC INDUCED FACILITATOR-LIKE 1 isoform X1 [Oryza sativa Japonica Group]	-	11	1	1657879
LOC_OS01G43480	--	--	Molecular Function: ATP binding (GO:0005524);; Cellular Component: cell wall (GO:0005618);; Cellular Component: nuclear envelope (GO:0005635);; Cellular Component: nucleoplasm (GO:0005654);; Cellular Component: nucleolus (GO:0005730);; Cellular Component: Golgi apparatus (GO:0005794);; Cellular Component: spindle (GO:0005819);; Cellular Component: plasma membrane (GO:0005886);; Biological Process…	--	--	[O]	Posttranslational modification, protein turnover, chaperones	ATPase family associated with various cellular activities (AAA);; AAA domain (dynein-related subfamily);; AAA domain (Cdc48 subfamily);; Holliday junction DNA helicase ruvB N-terminus	ATPase family AAA domain-containing protein FIGL1 OS=Arabidopsis thaliana OX=3702 GN=FIGL1 PE=2 SV=2	O	Posttranslational modification, protein turnover, chaperones	PREDICTED: peroxisomal biogenesis factor 6 [Oryza sativa Japonica Group]	+	20	2	2489948024899500
LOC_OS07G42395	--	--	Cellular Component: DNA-directed RNA polymerase IV complex (GO:0000418);; Cellular Component: DNA-directed RNA polymerase V complex (GO:0000419);; Molecular Function: DNA binding (GO:0003677);; Molecular Function: DNA-directed RNA polymerase activity (GO:0003899);; Cellular Component: DNA-directed RNA polymerase II, core complex (GO:0005665);; Biological Process: transcription, DNA-templated (GO:…	K03017|2.38771e-82|osa:4343902|Os07g0615800; K03017 DNA-directed RNA polymerase II subunit RPB9 (A)	ko00230:Purine metabolism;ko00240:Pyrimidine metabolism;ko03020:RNA polymerase	[K]	Transcription	RNA polymerases M/15 Kd subunit;; Transcription factor S-II (TFIIS)	DNA-directed RNA polymerases II, IV and V subunit 9A OS=Arabidopsis thaliana OX=3702 GN=NRPB9A PE=1 SV=1	K	Transcription	PREDICTED: DNA-directed RNA polymerases II, IV and V subunit 9A isoform X1 [Oryza sativa Japonica Group]	-	6	1	25369217
LOC_OS05G51850	--	--	Cellular Component: nucleosome (GO:0000786);; Molecular Function: DNA binding (GO:0003677);; Cellular Component: nucleus (GO:0005634);; Biological Process: nucleosome assembly (GO:0006334);; Biological Process: regulation of transcription, DNA-templated (GO:0006355);; Cellular Component: intracellular organelle (GO:0043229);;	--	--	--	--	linker histone H1 and H5 family	HMG-Y-related protein A OS=Zea mays OX=4577 GN=HMGIY2 PE=1 SV=1	S	Function unknown	AT1 [Oryza sativa Indica Group]	-	8	2	2975928029759410
LOC_OS05G29760	--	--	Biological Process: maltose metabolic process (GO:0000023);; Molecular Function: ferrochelatase activity (GO:0004325);; Molecular Function: protein serine/threonine kinase activity (GO:0004674);; Molecular Function: protein binding (GO:0005515);; Cellular Component: nucleus (GO:0005634);; Cellular Component: mitochondrion (GO:0005739);; Biological Process: pentose-phosphate shunt (GO:0006098);; B…	K01772|0|osa:4338537|Os05g0361200; K01772 ferrochelatase [EC:4.99.1.1] (A)	ko00860:Porphyrin and chlorophyll metabolism	[H]	Coenzyme transport and metabolism	Ferrochelatase	Ferrochelatase-2, chloroplastic OS=Oryza sativa subsp. indica OX=39946 GN=HEMH PE=2 SV=2	H	Coenzyme transport and metabolism	PREDICTED: ferrochelatase-2, chloroplastic [Oryza sativa Japonica Group]	+	20	4	1.72159e+31
LOC_OS07G48810	--	--	Cellular Component: mitochondrion (GO:0005739);; Cellular Component: chloroplast (GO:0009507);; Molecular Function: hydrolase activity (GO:0016787);; Molecular Function: isomerase activity (GO:0016853);;	--	--	[H]	Coenzyme transport and metabolism	PPIC-type PPIASE domain;; PPIC-type PPIASE domain;; Rhodanese-like domain	Rhodanese-like/PpiC domain-containing protein 12, chloroplastic OS=Arabidopsis thaliana OX=3702 GN=At5g19370 PE=1 SV=1	O	Posttranslational modification, protein turnover, chaperones	PREDICTED: rhodanese-like/PpiC domain-containing protein 12, chloroplastic [Oryza sativa Japonica Group]	+	6	2	2921266429212740
LOC_OS03G54790	--	--	Biological Process: response to reactive oxygen species (GO:0000302);; Cellular Component: plant-type vacuole (GO:0000325);; Biological Process: cell morphogenesis (GO:0000902);; Molecular Function: protein binding (GO:0005515);; Molecular Function: ATP binding (GO:0005524);; Cellular Component: vacuolar membrane (GO:0005774);; Cellular Component: plasma membrane (GO:0005886);; Biological Process…	--	--	[U]	Intracellular trafficking, secretion, and vesicular transport	ABC transporter transmembrane region;; ABC transporter	ABC transporter B family member 25 OS=Oryza sativa subsp. japonica OX=39947 GN=OsABCB25 PE=2 SV=1	V	Defense mechanisms	RecName: Full=ABC transporter B family member 25; Short=ABC transporter ABCB.25; Short=OsABCB25; AltName: Full=Protein ALS1 homolog	+	2	1	31155221
LOC_OS12G07060	--	--	Molecular Function: ATP binding (GO:0005524);; Cellular Component: nucleus (GO:0005634);; Cellular Component: endoplasmic reticulum lumen (GO:0005788);; Cellular Component: Golgi stack (GO:0005795);; Cellular Component: plasma membrane (GO:0005886);; Biological Process: DNA-dependent DNA replication (GO:0006261);; Biological Process: protein folding (GO:0006457);; Molecular Function: cytoskeletal…	K03686|0|osa:4351608|Os12g0168400; K03686 molecular chaperone DnaJ (A)	--	[O]	Posttranslational modification, protein turnover, chaperones	DnaJ C terminal domain;; DnaJ domain;; DnaJ central domain	Chaperone protein dnaJ GFA2, mitochondrial OS=Arabidopsis thaliana OX=3702 GN=GFA2 PE=2 SV=1	O	Posttranslational modification, protein turnover, chaperones	PREDICTED: chaperone protein DnaJ [Oryza sativa Japonica Group]	+	4	1	3462993
LOC_OS08G29650	--	--	Molecular Function: nucleotide binding (GO:0000166);; Molecular Function: nucleic acid binding (GO:0003676);; Cellular Component: cytoplasm (GO:0005737);; Biological Process: mRNA processing (GO:0006397);; Biological Process: cellular protein modification process (GO:0006464);; Biological Process: response to stress (GO:0006950);; Cellular Component: plastid (GO:0009536);; Biological Process: res…	K12897|2.55018e-77|osa:4345455|Os08g0385900; K12897 transformer-2 protein (A)	ko03040:Spliceosome	[K]	Transcription	RNA recognition motif. (a.k.a. RRM, RBD, or RNP domain)	Serine/arginine-rich splicing factor SR45a OS=Arabidopsis thaliana OX=3702 GN=SR45A PE=1 SV=1	K	Transcription	PREDICTED: serine/arginine-rich splicing factor SR45a [Oryza sativa Japonica Group]	+	11	2	1819565418195620
LOC_OS08G33160	--	--	Biological Process: cellular process (GO:0009987);; Biological Process: regulation of biological process (GO:0050789);; Biological Process: response to stimulus (GO:0050896);;	K13464|0|osa:4345625|Os08g0428400; K13464 jasmonate ZIM domain-containing protein (A)	ko04075:Plant hormone signal transduction	--	--	tify domain;; Divergent CCT motif	Protein TIFY 6a OS=Oryza sativa subsp. japonica OX=39947 GN=TIFY6A PE=1 SV=1	S	Function unknown	PREDICTED: protein TIFY 6a isoform X1 [Oryza sativa Japonica Group]	-	19	3	2.06252e+23
LOC_OS06G46340	--	--	Biological Process: RNA splicing, via endonucleolytic cleavage and ligation (GO:0000394);; Cellular Component: vacuole (GO:0005773);; Cellular Component: cytosol (GO:0005829);; Biological Process: carbohydrate metabolic process (GO:0005975);; Biological Process: starch metabolic process (GO:0005982);; Molecular Function: xylan 1,4-beta-xylosidase activity (GO:0009044);; Biological Process: methio…	K01187|0|osa:4341833|Os06g0676700; K01187 alpha-glucosidase [EC:3.2.1.20] (A)	ko00052:Galactose metabolism;ko00500:Starch and sucrose metabolism	[G]	Carbohydrate transport and metabolism	Glycosyl hydrolases family 31;; N-terminal barrel of NtMGAM and CtMGAM, maltase-glucoamylase;; Galactose mutarotase-like	Probable alpha-glucosidase Os06g0675700 OS=Oryza sativa subsp. japonica OX=39947 GN=Os06g0675700 PE=1 SV=1	G	Carbohydrate transport and metabolism	PREDICTED: probable alpha-glucosidase Os06g0675700 [Oryza sativa Japonica Group]	+	6	1	28105859
LOC_OS04G51792	--	--	Molecular Function: structural molecule activity (GO:0005198);; Cellular Component: chloroplast thylakoid (GO:0009534);; Cellular Component: chloroplast envelope (GO:0009941);; Biological Process: cysteine biosynthetic process (GO:0019344);; Biological Process: photosynthesis, light reaction (GO:0019684);; Biological Process: glucosinolate biosynthetic process (GO:0019761);; Biological Process: c…	--	--	--	--	PAP_fibrillin	Probable plastid-lipid-associated protein 8, chloroplastic OS=Arabidopsis thaliana OX=3702 GN=PAP8 PE=1 SV=1	S	Function unknown	OSIGBa0113I13.8 [Oryza sativa]	-	3	1	30688162
LOC_OS07G29640	--	--	Cellular Component: plastid (GO:0009536);; Biological Process: protein transport (GO:0015031);;	--	--	--	--	Protein of unknown function (DUF4050)	--	S	Function unknown	PREDICTED: uncharacterized protein LOC4343229 isoform X2 [Oryza sativa Japonica Group]	-	6	1	17426567
LOC_OS09G26620	--	--	Biological Process: cellular process (GO:0009987);; Cellular Component: nuclear lumen (GO:0031981);;	--	--	--	--	Dormancy/auxin associated protein	Dormancy-associated protein homolog 3 OS=Arabidopsis thaliana OX=3702 GN=At1g56220 PE=1 SV=1	S	Function unknown	PREDICTED: auxin-repressed 12.5 kDa protein [Oryza sativa Japonica Group]	+	3	1	16155032
LOC_OS03G57450	--	--	Biological Process: MAPK cascade (GO:0000165);; Molecular Function: protein serine/threonine kinase activity (GO:0004674);; Molecular Function: calmodulin-dependent protein kinase activity (GO:0004683);; Molecular Function: calcium ion binding (GO:0005509);; Molecular Function: ATP binding (GO:0005524);; Cellular Component: nucleus (GO:0005634);; Cellular Component: vacuole (GO:0005773);; Cellula…	K13412|0|dosa:Os03t0788500-01|Os03g0788500, CDPK10, CALCIUM-DEPENDENT_PROTEIN_KINASE_10; Similar to Calcium-dependent protein kinase 2.; K13412 calcium-dependent protein kinase [EC:2.7.11.1] (A)	ko04626:Plant-pathogen interaction	[T]	Signal transduction mechanisms	Protein kinase domain;; EF hand;; Protein tyrosine kinase;; EF-hand domain pair;; EF-hand domain;; EF hand;; EF-hand domain pair;; Cytoskeletal-regulatory complex EF hand;; Lipopolysaccharide kinase (Kdo/WaaP) family	Calcium-dependent protein kinase 10 OS=Oryza sativa subsp. japonica OX=39947 GN=CPK10 PE=2 SV=1	T	Signal transduction mechanisms	RecName: Full=Calcium-dependent protein kinase 10; Short=OsCDPK10; Short=OsCPK10	+	12	1	32755642
LOC_OS03G36540	--	--	Molecular Function: ATP binding (GO:0005524);; Cellular Component: cell wall (GO:0005618);; Biological Process: ATP catabolic process (GO:0006200);; Biological Process: rRNA processing (GO:0006364);; Biological Process: unsaturated fatty acid biosynthetic process (GO:0006636);; Biological Process: phosphatidylglycerol biosynthetic process (GO:0006655);; Cellular Component: chloroplast stroma (GO:…	K03405|0|osa:4333259|Os03g0563300; K03405 magnesium chelatase subunit I [EC:6.6.1.1] (A)	ko00860:Porphyrin and chlorophyll metabolism	--	--	Magnesium chelatase, subunit ChlI;; AAA domain (dynein-related subfamily);; MCM2/3/5 family	Magnesium-chelatase subunit ChlI, chloroplastic OS=Oryza sativa subsp. japonica OX=39947 GN=CHLI PE=1 SV=1	H	Coenzyme transport and metabolism	PREDICTED: magnesium-chelatase subunit ChlI, chloroplastic [Oryza sativa Japonica Group]	-	12	2	2024836120248320
LOC_OS03G07160	--	--	Cellular Component: cytoplasm (GO:0005737);; Cellular Component: plastid (GO:0009536);; Cellular Component: intracellular membrane-bounded organelle (GO:0043231);; Biological Process: response to stimulus (GO:0050896);;	--	--	[R]	General function prediction only	Kelch motif;; Kelch motif;; Galactose oxidase, central domain;; F-box domain	F-box/kelch-repeat protein At1g55270 OS=Arabidopsis thaliana OX=3702 GN=At1g55270 PE=2 SV=1	S	Function unknown	PREDICTED: F-box/kelch-repeat protein At1g55270 isoform X3 [Oryza sativa Japonica Group]	+	4	1	3669751
LOC_OS02G15310	--	--	Molecular Function: nucleotide binding (GO:0000166);; Biological Process: mRNA splicing, via spliceosome (GO:0000398);; Molecular Function: nucleic acid binding (GO:0003676);; Cellular Component: nucleolus (GO:0005730);; Cellular Component: cytosol (GO:0005829);; Cellular Component: plasma membrane (GO:0005886);; Biological Process: regulation of transcription, DNA-templated (GO:0006355);; Biolog…	K12900|4.19318e-106|osa:4328900|Os02g0252100; K12900 FUS-interacting serine-arginine-rich protein 1 (A)	ko03040:Spliceosome	[R]	General function prediction only	RNA recognition motif. (a.k.a. RRM, RBD, or RNP domain)	Serine/arginine-rich SC35-like splicing factor SCL30 OS=Arabidopsis thaliana OX=3702 GN=SCL30 PE=1 SV=1	S	Function unknown	PREDICTED: serine/arginine-rich SC35-like splicing factor SCL30 [Oryza sativa Japonica Group]	-	71	4	8.55395e+27
LOC_OS04G53350	--	--	Cellular Component: mitochondrion (GO:0005739);; Cellular Component: plastid (GO:0009536);;	--	--	--	--	--	Protein BRANCHLESS TRICHOME OS=Arabidopsis thaliana OX=3702 GN=BLT PE=1 SV=1	S	Function unknown	PREDICTED: uncharacterized protein LOC107276041 [Oryza sativa Japonica Group]	-	6	1	31769054
LOC_OS03G62640	--	--	Biological Process: mRNA splicing, via spliceosome (GO:0000398);; Molecular Function: nucleic acid binding (GO:0003676);; Molecular Function: protein binding (GO:0005515);; Cellular Component: nucleus (GO:0005634);; Cellular Component: cytoplasm (GO:0005737);; Biological Process: regulation of transcription, DNA-templated (GO:0006355);; Biological Process: cellular protein modification process (G…	--	--	[A]	RNA processing and modification	LUC7 N_terminus	--	A	RNA processing and modification	PREDICTED: putative RNA-binding protein Luc7-like 2 [Oryza sativa Japonica Group]	-	52	2	3544644735451500
LOC_OS08G10500	--	--	--	--	--	--	--	Cysteine-rich TM module stress tolerance	--	--	--	PREDICTED: cysteine-rich and transmembrane domain-containing protein A [Oryza sativa Japonica Group]	+	11	1	6169286
LOC_OS06G11380	--	--	Biological Process: preprophase band assembly (GO:0000913);; Molecular Function: microtubule motor activity (GO:0003777);; Molecular Function: ATP binding (GO:0005524);; Cellular Component: nucleus (GO:0005634);; Cellular Component: cytosol (GO:0005829);; Cellular Component: kinesin complex (GO:0005871);; Cellular Component: microtubule (GO:0005874);; Cellular Component: plasma membrane (GO:00058…	--	--	[Z]	Cytoskeleton	--	Kinesin-like protein KIN-14L OS=Oryza sativa subsp. japonica OX=39947 GN=KIN14L PE=2 SV=1	Z	Cytoskeleton	PREDICTED: kinesin-like protein KCA2 [Oryza sativa Japonica Group]	-	4	1	5982701
LOC_OS01G12710	--	--	Molecular Function: nucleotide binding (GO:0000166);; Molecular Function: protein binding (GO:0005515);; Cellular Component: chloroplast thylakoid membrane (GO:0009535);; Biological Process: PSII associated light-harvesting complex II catabolic process (GO:0010304);; Biological Process: chlorophyll catabolic process (GO:0015996);; Cellular Component: integral component of membrane (GO:0016021);; …	K13606|0|osa:4327178|Os01g0227100; K13606 chlorophyll(ide) b reductase [EC:1.1.1.294] (A)	ko00860:Porphyrin and chlorophyll metabolism	[R]	General function prediction only	short chain dehydrogenase;; Enoyl-(Acyl carrier protein) reductase;; KR domain;; NADP oxidoreductase coenzyme F420-dependent	Probable chlorophyll(ide) b reductase NYC1, chloroplastic OS=Oryza sativa subsp. japonica OX=39947 GN=NYC1 PE=1 SV=1	S	Function unknown	PREDICTED: probable chlorophyll(ide) b reductase NYC1, chloroplastic [Oryza sativa Japonica Group]	+	7	2	70304097030358
LOC_OS04G33640	--	--	Biological Process: microtubule cytoskeleton organization (GO:0000226);; Biological Process: cytokinesis by cell plate formation (GO:0000911);; Molecular Function: hydrolase activity, hydrolyzing O-glycosyl compounds (GO:0004553);; Cellular Component: extracellular region (GO:0005576);; Cellular Component: nucleus (GO:0005634);; Cellular Component: cytoplasm (GO:0005737);; Cellular Component: end…	--	--	--	--	Glycosyl hydrolases family 17	Glucan endo-1,3-beta-glucosidase 14 OS=Arabidopsis thaliana OX=3702 GN=At2g27500 PE=1 SV=2	G	Carbohydrate transport and metabolism	PREDICTED: glucan endo-1,3-beta-glucosidase 14 [Oryza sativa Japonica Group]	+	47	5	2.03777e+39
LOC_OS02G57540	--	--	Biological Process: RNA methylation (GO:0001510);; Molecular Function: structural constituent of ribosome (GO:0003735);; Cellular Component: cell wall (GO:0005618);; Cellular Component: plasma membrane (GO:0005886);; Biological Process: translation (GO:0006412);; Biological Process: pyrimidine ribonucleotide biosynthetic process (GO:0009220);; Cellular Component: plasmodesma (GO:0009506);; Cellul…	K02903|2.31219e-103|osa:4331176|Os02g0821200; K02903 large subunit ribosomal protein L28e (A)	ko03010:Ribosome	[J]	Translation, ribosomal structure and biogenesis	Ribosomal L28e protein family	60S ribosomal protein L28-1 OS=Arabidopsis thaliana OX=3702 GN=RPL28A PE=1 SV=1	J	Translation, ribosomal structure and biogenesis	PREDICTED: 60S ribosomal protein L28-1 [Oryza sativa Japonica Group]	-	8	2	3525633735256370
LOC_OS01G55270	--	--	Cellular Component: plasma membrane (GO:0005886);; Biological Process: protein folding (GO:0006457);; Biological Process: defense response (GO:0006952);; Biological Process: signal transduction (GO:0007165);; Biological Process: response to heat (GO:0009408);; Biological Process: response to high light intensity (GO:0009644);; Biological Process: response to endoplasmic reticulum stress (GO:00349…	K04507|9.68553e-124|osa:4325302|Os01g0757500; K04507 calcyclin binding protein (A)	--	[T]	Signal transduction mechanisms	CS domain;; Siah interacting protein, N terminal	--	S	Function unknown	PREDICTED: calcyclin-binding protein [Oryza sativa Japonica Group]	-	29	4	3.18114e+31
LOC_OS09G04210	--	--	Biological Process: metabolic process (GO:0008152);; Molecular Function: zinc ion binding (GO:0008270);; Molecular Function: hydrolase activity (GO:0016787);;	K15442|0|osa:4346442|Os09g0128600; K15442 tRNA-specific adenosine deaminase 3 (A)	--	[A]	RNA processing and modification	Cytidine and deoxycytidylate deaminase zinc-binding region	--	FJ	--	PREDICTED: probable inactive tRNA-specific adenosine deaminase-like protein 3 isoform X1 [Oryza sativa Japonica Group]	-	7	2	22122572212276
LOC_OS06G02180	--	--	Biological Process: microtubule cytoskeleton organization (GO:0000226);; Biological Process: double-strand break repair via homologous recombination (GO:0000724);; Biological Process: cytokinesis by cell plate formation (GO:0000911);; Cellular Component: endosome (GO:0005768);; Cellular Component: endoplasmic reticulum (GO:0005783);; Cellular Component: trans-Golgi network (GO:0005802);; Cellular…	--	--	--	--	Cellulose synthase;; RING/Ubox like zinc-binding domain;; Glycosyl transferase family group 2	Cellulose synthase-like protein D2 OS=Oryza sativa subsp. japonica OX=39947 GN=CSLD2 PE=2 SV=1	M	Cell wall/membrane/envelope biogenesis	PREDICTED: cellulose synthase-like protein D2 [Oryza sativa Japonica Group]	-	5	1	660263
LOC_OS03G15870	--	--	Cellular Component: plastid large ribosomal subunit (GO:0000311);; Molecular Function: RNA binding (GO:0003723);; Molecular Function: structural constituent of ribosome (GO:0003735);; Molecular Function: structural molecule activity (GO:0005198);; Cellular Component: nucleus (GO:0005634);; Cellular Component: ribosome (GO:0005840);; Biological Process: transcription, DNA-templated (GO:0006351);; …	K02926|3.98888e-146|osa:4332348|Os03g0265400; K02926 large subunit ribosomal protein L4 (A)	ko03010:Ribosome	[J]	Translation, ribosomal structure and biogenesis	Ribosomal protein L4/L1 family	50S ribosomal protein L4, chloroplastic OS=Arabidopsis thaliana OX=3702 GN=RPL4 PE=2 SV=2	J	Translation, ribosomal structure and biogenesis	PREDICTED: 50S ribosomal protein L4, chloroplastic [Oryza sativa Japonica Group]	+	35	3	8.75595e+20
LOC_OS02G03260	--	--	Biological Process: maltose metabolic process (GO:0000023);; Molecular Function: 3-isopropylmalate dehydratase activity (GO:0003861);; Biological Process: gluconeogenesis (GO:0006094);; Biological Process: glycolytic process (GO:0006096);; Biological Process: cellular amino acid biosynthetic process (GO:0008652);; Cellular Component: chloroplast stroma (GO:0009570);; Biological Process: response …	K01703|0|osa:4328147|Os02g0125100; K01703 3-isopropylmalate/(R)-2-methylmalate dehydratase large subunit [EC:4.2.1.33 4.2.1.35] (A)	ko00290:Valine, leucine and isoleucine biosynthesis;ko00660:C5-Branched dibasic acid metabolism;ko01210:2-Oxocarboxylic acid metabolism;ko01230:Biosynthesis of amino acids	[E]	Amino acid transport and metabolism	Aconitase family (aconitate hydratase)	3-isopropylmalate dehydratase large subunit, chloroplastic OS=Arabidopsis thaliana OX=3702 GN=IIL1 PE=1 SV=1	E	Amino acid transport and metabolism	PREDICTED: 3-isopropylmalate dehydratase large subunit [Oryza sativa Japonica Group]	-	5	1	1304899
LOC_OS09G27690	--	--	Cellular Component: mitochondrion (GO:0005739);; Cellular Component: plastid (GO:0009536);;	--	--	--	--	SecE/Sec61-gamma subunits of protein translocation complex	--	S	Function unknown	PREDICTED: uncharacterized protein LOC4347220 [Oryza sativa Japonica Group]	+	9	1	16854658
LOC_OS06G10660	--	--	Molecular Function: protein kinase activity (GO:0004672);; Biological Process: protein phosphorylation (GO:0006468);; Biological Process: response to stress (GO:0006950);; Biological Process: immune response (GO:0006955);; Biological Process: plant-type cell wall organization (GO:0009664);; Biological Process: regulation of flower development (GO:0009909);; Cellular Component: cytoplasmic membran…	--	--	--	--	LysM domain	LysM domain-containing GPI-anchored protein LYP6 OS=Oryza sativa subsp. japonica OX=39947 GN=LYP6 PE=1 SV=1	S	Function unknown	PREDICTED: lysM domain-containing GPI-anchored protein 1 [Oryza sativa Japonica Group]	+	2	1	5562930
LOC_OS03G11500	--	--	Cellular Component: mitochondrion (GO:0005739);; Cellular Component: plastid (GO:0009536);; Cellular Component: chloroplast envelope (GO:0009941);; Biological Process: response to UV-B (GO:0010224);; Biological Process: developmental process (GO:0032502);;	--	--	[S]	Function unknown	Vitamin B6 photo-protection and homoeostasis	Protein root UVB sensitive 3 OS=Arabidopsis thaliana OX=3702 GN=RUS3 PE=2 SV=1	S	Function unknown	expressed protein [Oryza sativa Japonica Group]	-	4	1	5955420
LOC_OS05G43230	--	--	Cellular Component: plant-type vacuole (GO:0000325);; Molecular Function: cysteine-type endopeptidase activity (GO:0004197);; Molecular Function: phospholipase A2 activity (GO:0004623);; Molecular Function: protein binding (GO:0005515);; Cellular Component: cell wall (GO:0005618);; Cellular Component: vacuole (GO:0005773);; Cellular Component: endoplasmic reticulum (GO:0005783);; Cellular Compone…	--	--	[O]	Posttranslational modification, protein turnover, chaperones	Papain family cysteine protease;; Cathepsin propeptide inhibitor domain (I29);; Granulin;; Peptidase C1-like family	Probable cysteine protease RD21B OS=Arabidopsis thaliana OX=3702 GN=RD21B PE=1 SV=1	O	Posttranslational modification, protein turnover, chaperones	PREDICTED: low-temperature-induced cysteine proteinase [Oryza sativa Japonica Group]	+	6	1	25157638
LOC_OS08G42040	--	--	Molecular Function: catalytic activity (GO:0003824);; Molecular Function: binding (GO:0005488);; Biological Process: lipid transport (GO:0006869);; Cellular Component: cytoplasmic membrane-bounded vesicle (GO:0016023);; Biological Process: protein metabolic process (GO:0019538);; Cellular Component: intracellular membrane-bounded organelle (GO:0043231);; Biological Process: cellular macromolecule…	--	--	--	--	Probable lipid transfer;; Protease inhibitor/seed storage/LTP family	Non-specific lipid transfer protein GPI-anchored 1 OS=Arabidopsis thaliana OX=3702 GN=LTPG1 PE=1 SV=1	U	Intracellular trafficking, secretion, and vesicular transport	PREDICTED: non-specific lipid transfer protein GPI-anchored 1 isoform X1 [Oryza sativa Japonica Group]	-	6	2	2655417626554290
LOC_OS07G46730	--	--	Cellular Component: intracellular membrane-bounded organelle (GO:0043231);; Cellular Component: cytoplasmic part (GO:0044444);;	--	--	[R]	General function prediction only	PPR repeat;; PPR repeat family;; PPR repeat;; Pentatricopeptide repeat domain;; Pentacotripeptide-repeat region of PRORP	Pentatricopeptide repeat-containing protein At1g01970 OS=Arabidopsis thaliana OX=3702 GN=At1g01970 PE=2 SV=1	S	Function unknown	PREDICTED: pentatricopeptide repeat-containing protein At1g01970 [Oryza sativa Japonica Group]	-	7	2	2792971727929760
LOC_OS02G55890	--	--	Molecular Function: inorganic diphosphatase activity (GO:0004427);; Cellular Component: mitochondrion (GO:0005739);; Cellular Component: vacuolar membrane (GO:0005774);; Cellular Component: Golgi apparatus (GO:0005794);; Cellular Component: cytosol (GO:0005829);; Cellular Component: plasma membrane (GO:0005886);; Biological Process: response to water deprivation (GO:0009414);; Biological Process:…	K01507|0|osa:4331044|Os02g0802500; K01507 inorganic pyrophosphatase [EC:3.6.1.1] (A)	ko00190:Oxidative phosphorylation	--	--	Inorganic H+ pyrophosphatase	Pyrophosphate-energized vacuolar membrane proton pump OS=Hordeum vulgare OX=4513 PE=2 SV=2	C	Energy production and conversion	PREDICTED: pyrophosphate-energized vacuolar membrane proton pump [Oryza sativa Japonica Group]	-	228	7	3.42105e+55
LOC_OS09G04730	--	--	Molecular Function: nucleotide binding (GO:0000166);; Cellular Component: peroxisome (GO:0005777);; Biological Process: response to abiotic stimulus (GO:0009628);; Biological Process: terpenoid biosynthetic process (GO:0016114);; Molecular Function: oxidoreductase activity (GO:0016491);; Molecular Function: oxidoreductase activity, acting on the CH-OH group of donors, NAD or NADP as acceptor (GO:…	K11147|1.1761e-154|osa:4346459|Os09g0133200; K11147 dehydrogenase/reductase SDR family member 4 [EC:1.1.-.-] (A)	ko04146:Peroxisome	[R]	General function prediction only	Enoyl-(Acyl carrier protein) reductase;; short chain dehydrogenase;; KR domain	Tropinone reductase-like 3 OS=Erythroxylum coca OX=289672 PE=2 SV=1	S	Function unknown	PREDICTED: tropinone reductase-like 3 [Oryza sativa Japonica Group]	-	13	2	25124672511898
LOC_OS04G53540	--	--	Biological Process: double-strand break repair via homologous recombination (GO:0000724);; Molecular Function: sequence-specific DNA binding transcription factor activity (GO:0003700);; Molecular Function: protein binding (GO:0005515);; Cellular Component: nucleus (GO:0005634);; Cellular Component: cytoplasm (GO:0005737);; Biological Process: regulation of transcription, DNA-templated (GO:0006355…	K09338|0|osa:4337074|Os04g0627000; K09338 homeobox-leucine zipper protein (A)	--	--	--	START domain;; Homeobox domain	Homeobox-leucine zipper protein ROC2 OS=Oryza sativa subsp. japonica OX=39947 GN=ROC2 PE=2 SV=1	K	Transcription	PREDICTED: homeobox-leucine zipper protein ROC2 isoform X1 [Oryza sativa Japonica Group]	-	18	2	3190021431900230
LOC_OS06G22960	--	--	Cellular Component: protein storage vacuole (GO:0000326);; Cellular Component: plasma membrane (GO:0005886);; Biological Process: glycolytic process (GO:0006096);; Biological Process: polyamine catabolic process (GO:0006598);; Biological Process: calcium ion transport (GO:0006816);; Biological Process: iron ion transport (GO:0006826);; Biological Process: water transport (GO:0006833);; Biological…	K09873|1.79392e-154|osa:4340941|Os06g0336200; K09873 aquaporin TIP (A)	--	[G]	Carbohydrate transport and metabolism	Major intrinsic protein	Probable aquaporin TIP2-2 OS=Oryza sativa subsp. japonica OX=39947 GN=TIP2-2 PE=2 SV=1	G	Carbohydrate transport and metabolism	PREDICTED: probable aquaporin TIP2-2 [Oryza sativa Japonica Group]	+	77	6	1.34087e+47
LOC_OS03G51550	--	--	Molecular Function: nucleotide binding (GO:0000166);; Cellular Component: heterotrimeric G-protein complex (GO:0005834);; Cellular Component: cytoskeleton (GO:0005856);; Biological Process: transcription, DNA-templated (GO:0006351);; Biological Process: cellular protein modification process (GO:0006464);; Biological Process: defense response (GO:0006952);; Biological Process: meiotic nuclear divi…	K14963|0|osa:4333964|Os03g0725400; K14963 COMPASS component SWD3 (A)	--	[R]	General function prediction only	WD domain, G-beta repeat;; Anaphase-promoting complex subunit 4 WD40 domain;; Eukaryotic translation initiation factor eIF2A;; WD40 region of Ge1, enhancer of mRNA-decapping protein;; Nucleoporin Nup120/160	COMPASS-like H3K4 histone methylase component WDR5A OS=Arabidopsis thaliana OX=3702 GN=WDR5A PE=1 SV=1	S	Function unknown	PREDICTED: COMPASS-like H3K4 histone methylase component WDR5A [Oryza sativa Japonica Group]	+	2	1	29489764
LOC_OS01G22352	--	--	Biological Process: transition metal ion transport (GO:0000041);; Biological Process: immune system process (GO:0002376);; Molecular Function: peroxidase activity (GO:0004601);; Molecular Function: protein binding (GO:0005515);; Cellular Component: vacuolar membrane (GO:0005774);; Cellular Component: Golgi apparatus (GO:0005794);; Cellular Component: cytosol (GO:0005829);; Biological Process: res…	--	--	--	--	Peroxidase	Peroxidase 1 OS=Zea mays OX=4577 GN=PER1 PE=1 SV=1	S	Function unknown	PREDICTED: peroxidase 1 [Oryza sativa Japonica Group]	+	16	4	1.25699e+31
LOC_OS05G33610	--	--	Cellular Component: mitochondrion (GO:0005739);; Biological Process: vacuole organization (GO:0007033);; Biological Process: cellular response to phosphate starvation (GO:0016036);; Biological Process: galactolipid biosynthetic process (GO:0019375);; Biological Process: response to starvation (GO:0042594);; Biological Process: cellular response to water deprivation (GO:0042631);;	--	--	[R]	General function prediction only	Breast carcinoma amplified sequence 3	Autophagy-related protein 18g OS=Arabidopsis thaliana OX=3702 GN=ATG18G PE=2 SV=1	S	Function unknown	PREDICTED: autophagy-related protein 18h isoform X1 [Oryza sativa Japonica Group]	+	5	2	1977499319775020
LOC_OS03G61560	--	--	Biological Process: RNA methylation (GO:0001510);; Molecular Function: RNA binding (GO:0003723);; Cellular Component: nucleolus (GO:0005730);; Cellular Component: cytosol (GO:0005829);; Biological Process: mRNA export from nucleus (GO:0006406);; Biological Process: protein import into nucleus (GO:0006606);;	K14844|0|osa:4334667|Os03g0831100; K14844 pumilio homology domain family member 6 (A)	--	[J]	Translation, ribosomal structure and biogenesis	CPL (NUC119) domain	Pumilio homolog 24 OS=Arabidopsis thaliana OX=3702 GN=APUM24 PE=1 SV=1	S	Function unknown	PREDICTED: pumilio homolog 24 [Oryza sativa Japonica Group]	-	9	2	3490665534906680
LOC_OS02G58210	--	--	Molecular Function: DNA binding (GO:0003677);; Biological Process: DNA methylation (GO:0006306);; Biological Process: regulation of transcription, DNA-templated (GO:0006355);; Biological Process: cellular protein modification process (GO:0006464);; Molecular Function: zinc ion binding (GO:0008270);; Biological Process: gene silencing by RNA (GO:0031047);; Biological Process: shoot system developm…	K15601|0|osa:4331234|Os02g0828900; K15601 lysine-specific demethylase 3 [EC:1.14.11.-] (A)	--	[K]	Transcription	JmjC domain, hydroxylase	Lysine-specific demethylase JMJ25 OS=Arabidopsis thaliana OX=3702 GN=JMJ25 PE=1 SV=1	S	Function unknown	hypothetical protein OsJ_08976 [Oryza sativa Japonica Group]	+	2	1	35630798
LOC_OS02G47610	--	--	Molecular Function: nucleotide binding (GO:0000166);; Molecular Function: sequence-specific DNA binding transcription factor activity (GO:0003700);; Molecular Function: protein binding (GO:0005515);; Cellular Component: nucleus (GO:0005634);; Cellular Component: cytoplasm (GO:0005737);; Cellular Component: plasma membrane (GO:0005886);; Biological Process: transcription, DNA-templated (GO:0006351…	--	--	--	--	NmrA-like family;; NAD(P)H-binding	Probable pinoresinol-lariciresinol reductase 3 OS=Arabidopsis thaliana OX=3702 GN=PLR3 PE=3 SV=2	S	Function unknown	PREDICTED: probable pinoresinol-lariciresinol reductase 3 [Oryza sativa Japonica Group]	-	6	1	29095032
LOC_OS08G23810	--	--	Molecular Function: enoyl-[acyl-carrier-protein] reductase (NADH) activity (GO:0004318);; Molecular Function: copper ion binding (GO:0005507);; Cellular Component: fatty acid synthase complex (GO:0005835);; Biological Process: acetyl-CoA metabolic process (GO:0006084);; Biological Process: fatty acid biosynthetic process (GO:0006633);; Biological Process: calcium ion transport (GO:0006816);; Biol…	K00208|0|osa:4345286|Os08g0327400; K00208 enoyl-[acyl-carrier protein] reductase I [EC:1.3.1.9 1.3.1.10] (A)	ko00061:Fatty acid biosynthesis;ko00780:Biotin metabolism;ko01212:Fatty acid metabolism	[R]	General function prediction only	Enoyl-(Acyl carrier protein) reductase;; short chain dehydrogenase	Enoyl-[acyl-carrier-protein] reductase [NADH] 1, chloroplastic OS=Oryza sativa subsp. japonica OX=39947 GN=Os08g0327400 PE=2 SV=1	I	Lipid transport and metabolism	PREDICTED: enoyl-[acyl-carrier-protein] reductase [NADH] 1, chloroplastic [Oryza sativa Japonica Group]	+	12	2	1441899114418930
LOC_OS06G51029	--	--	Molecular Function: ATP-dependent peptidase activity (GO:0004176);; Molecular Function: metalloendopeptidase activity (GO:0004222);; Molecular Function: ATP binding (GO:0005524);; Biological Process: pentose-phosphate shunt (GO:0006098);; Biological Process: rRNA processing (GO:0006364);; Biological Process: protein folding (GO:0006457);; Biological Process: proteolysis (GO:0006508);; Biological …	K03798|0|osa:4342113|Os06g0725900; K03798 cell division protease FtsH [EC:3.4.24.-] (A)	--	[O]	Posttranslational modification, protein turnover, chaperones	Peptidase family M41;; ATPase family associated with various cellular activities (AAA);; AAA domain (dynein-related subfamily)	ATP-dependent zinc metalloprotease FTSH 1, chloroplastic OS=Oryza sativa subsp. japonica OX=39947 GN=FTSH1 PE=2 SV=1	O	Posttranslational modification, protein turnover, chaperones	PREDICTED: ATP-dependent zinc metalloprotease FTSH 1, chloroplastic [Oryza sativa Japonica Group]	-	16	1	30870452
LOC_OS10G41370	--	--	Cellular Component: Cul4-RING E3 ubiquitin ligase complex (GO:0080008);;	--	--	[R]	General function prediction only	Anaphase-promoting complex subunit 4 WD40 domain;; Eukaryotic translation initiation factor eIF2A	--	S	Function unknown	PREDICTED: WD repeat-containing protein WRAP73 [Oryza sativa Japonica Group]	-	16	3	2.2237e+23
LOC_OS05G37830	--	--	Biological Process: embryo development ending in seed dormancy (GO:0009793);;	--	--	--	--	--	--	S	Function unknown	PREDICTED: uncharacterized protein LOC4338962 isoform X1 [Oryza sativa Japonica Group]	-	4	1	22160241
LOC_OS09G36100	--	--	Cellular Component: plastid (GO:0009536);;	--	--	--	--	--	--	S	Function unknown	PREDICTED: uncharacterized protein LOC4347664 [Oryza sativa Japonica Group]	+	10	2	2079024520790260
LOC_OS05G08980	--	--	--	--	--	--	--	Protein of unknown function (DUF1664)	--	S	Function unknown	PREDICTED: uncharacterized protein LOC4337995 [Oryza sativa Japonica Group]	+	13	1	4976457
LOC_OS06G50220	--	--	Cellular Component: mitochondrion (GO:0005739);; Molecular Function: kinase activity (GO:0016301);; Biological Process: phosphorylation (GO:0016310);;	--	--	--	--	Protein of unknown function (DUF668);; Domain of unknown function (DUF3475)	--	S	Function unknown	PREDICTED: uncharacterized protein LOC4342075 isoform X1 [Oryza sativa Japonica Group]	+	5	2	3041448030414500
LOC_OS05G02020	--	--	Biological Process: RNA splicing, via endonucleolytic cleavage and ligation (GO:0000394);; Biological Process: respiratory burst involved in defense response (GO:0002679);; Molecular Function: protein serine/threonine kinase activity (GO:0004674);; Molecular Function: protein binding (GO:0005515);; Molecular Function: ATP binding (GO:0005524);; Cellular Component: nucleolus (GO:0005730);; Cellula…	K04733|0|osa:4337593|Os05g0110900; K04733 interleukin-1 receptor-associated kinase 4 [EC:2.7.11.1] (A)	--	[T]	Signal transduction mechanisms	Protein tyrosine kinase;; Protein kinase domain	Receptor-like cytoplasmic kinase 176 OS=Oryza sativa subsp. japonica OX=39947 GN=RLCK176 PE=1 SV=1	T	Signal transduction mechanisms	PREDICTED: protein kinase APK1A, chloroplastic [Oryza sativa Japonica Group]	-	8	2	577220577161
LOC_OS05G41990	--	--	Biological Process: respiratory burst involved in defense response (GO:0002679);; Molecular Function: peroxidase activity (GO:0004601);; Cellular Component: extracellular region (GO:0005576);; Cellular Component: nucleus (GO:0005634);; Cellular Component: endoplasmic reticulum (GO:0005783);; Biological Process: protein targeting to membrane (GO:0006612);; Biological Process: iron ion transport (G…	K00430|0|osa:4339222|Os05g0499300; K00430 peroxidase [EC:1.11.1.7] (A)	ko00360:Phenylalanine metabolism;ko00940:Phenylpropanoid biosynthesis	--	--	Peroxidase	Peroxidase 1 OS=Oryza sativa subsp. japonica OX=39947 GN=PRX74 PE=2 SV=2	G	Carbohydrate transport and metabolism	PREDICTED: peroxidase 1 [Oryza sativa Japonica Group]	+	31	2	2458492524584840
LOC_OS07G26690	--	--	Molecular Function: transporter activity (GO:0005215);; Cellular Component: vacuole (GO:0005773);; Cellular Component: plasma membrane (GO:0005886);; Biological Process: glycolytic process (GO:0006096);; Biological Process: calcium ion transport (GO:0006816);; Biological Process: iron ion transport (GO:0006826);; Biological Process: water transport (GO:0006833);; Biological Process: response to o…	K09872|0|osa:4343122|Os07g0448800; K09872 aquaporin PIP (A)	--	[G]	Carbohydrate transport and metabolism	Major intrinsic protein	Probable aquaporin PIP2-1 OS=Oryza sativa subsp. japonica OX=39947 GN=PIP2-1 PE=2 SV=1	G	Carbohydrate transport and metabolism	PREDICTED: probable aquaporin PIP2-1 [Oryza sativa Japonica Group]	+	90	6	1.541e+47
LOC_OS08G37490	--	--	Biological Process: DNA damage checkpoint (GO:0000077);; Molecular Function: phospholipase A2 activity (GO:0004623);; Molecular Function: ATP binding (GO:0005524);; Cellular Component: nucleus (GO:0005634);; Cellular Component: nuclear envelope (GO:0005635);; Cellular Component: mitochondrion (GO:0005739);; Cellular Component: cytosol (GO:0005829);; Cellular Component: plasma membrane (GO:0005886…	K06630|1.41782e-146|osa:4345850|Os08g0480800; K06630 14-3-3 protein epsilon (A)	--	[O]	Posttranslational modification, protein turnover, chaperones	14-3-3 protein	14-3-3-like protein GF14-A OS=Oryza sativa subsp. japonica OX=39947 GN=GF14A PE=2 SV=1	T	Signal transduction mechanisms	PREDICTED: 14-3-3-like protein GF14-A [Oryza sativa Japonica Group]	+	23	1	23752508
LOC_OS06G03640	--	--	Cellular Component: mitochondrion (GO:0005739);; Biological Process: apoptotic process (GO:0006915);; Biological Process: response to stress (GO:0006950);; Biological Process: response to abiotic stimulus (GO:0009628);; Biological Process: tissue development (GO:0009888);; Cellular Component: cytoplasmic membrane-bounded vesicle (GO:0016023);; Biological Process: macromolecule metabolic process (…	--	--	[T]	Signal transduction mechanisms	BAG domain;; Ubiquitin family	BAG family molecular chaperone regulator 3 OS=Arabidopsis thaliana OX=3702 GN=BAG3 PE=1 SV=1	O	Posttranslational modification, protein turnover, chaperones	PREDICTED: BAG family molecular chaperone regulator 3 [Oryza sativa Japonica Group]	+	28	3	1.41622e+20
LOC_OS07G22350	--	--	Molecular Function: glucose-6-phosphate dehydrogenase activity (GO:0004345);; Cellular Component: mitochondrion (GO:0005739);; Cellular Component: cytosol (GO:0005829);; Biological Process: chromatin assembly or disassembly (GO:0006333);; Biological Process: pentose-phosphate shunt, oxidative branch (GO:0009051);; Cellular Component: plastid (GO:0009536);; Cellular Component: chloroplast stroma (…	K00036|0|osa:4342988|Os07g0406300; K00036 glucose-6-phosphate 1-dehydrogenase [EC:1.1.1.49] (A)	ko00030:Pentose phosphate pathway;ko00480:Glutathione metabolism;ko01200:Carbon metabolism	[G]	Carbohydrate transport and metabolism	Glucose-6-phosphate dehydrogenase, C-terminal domain;; Glucose-6-phosphate dehydrogenase, NAD binding domain	Glucose-6-phosphate 1-dehydrogenase 2, chloroplastic OS=Arabidopsis thaliana OX=3702 GN=At5g13110 PE=1 SV=2	G	Carbohydrate transport and metabolism	PREDICTED: glucose-6-phosphate 1-dehydrogenase 2, chloroplastic [Oryza sativa Japonica Group]	-	7	2	1254429412544320
LOC_OS06G28480	--	--	Biological Process: regionalization (GO:0003002);; Molecular Function: protein kinase activity (GO:0004672);; Molecular Function: protein binding (GO:0005515);; Biological Process: signal transduction (GO:0007165);; Biological Process: hormone-mediated signaling pathway (GO:0009755);; Biological Process: post-embryonic morphogenesis (GO:0009886);; Biological Process: organ morphogenesis (GO:00098…	--	--	[R]	General function prediction only	Leucine rich repeat;; Leucine Rich repeats (2 copies);; Leucine rich repeat N-terminal domain;; Leucine Rich Repeat	Brassinosteroid LRR receptor kinase BRL2 OS=Oryza sativa subsp. japonica OX=39947 GN=BRL2 PE=2 SV=1	S	Function unknown	PREDICTED: probable LRR receptor-like serine/threonine-protein kinase At1g34110 [Oryza sativa Japonica Group]	+	7	1	16200417
LOC_OS01G56680	--	--	Biological Process: rRNA processing (GO:0006364);; Cellular Component: photosystem II (GO:0009523);; Cellular Component: chloroplast thylakoid membrane (GO:0009535);; Biological Process: plastid organization (GO:0009657);; Biological Process: photosystem II assembly (GO:0010207);; Biological Process: photosynthesis (GO:0015979);; Cellular Component: integral component of membrane (GO:0016021);; B…	K02721|7.2808e-15|osa:4327150|Os01g0773700; K02721 photosystem II PsbW protein (A)	ko00195:Photosynthesis	--	--	Photosystem II reaction centre W protein (PsbW)	Photosystem II reaction center W protein, chloroplastic OS=Oryza sativa subsp. japonica OX=39947 GN=PSBW PE=2 SV=1	S	Function unknown	PREDICTED: photosystem II reaction center W protein, chloroplastic [Oryza sativa Japonica Group]	-	159	6	3.27086e+47
LOC_OS06G40040	--	--	Molecular Function: nucleic acid binding (GO:0003676);; Cellular Component: nucleus (GO:0005634);; Cellular Component: cytosol (GO:0005829);; Biological Process: fatty acid catabolic process (GO:0009062);;	--	--	--	--	Alba;; Rpp20 subunit of nuclear RNase MRP and P	Uncharacterized protein At2g34160 OS=Arabidopsis thaliana OX=3702 GN=At2g34160 PE=1 SV=1	S	Function unknown	PREDICTED: uncharacterized protein At2g34160 [Oryza sativa Japonica Group]	+	3	1	23823256
LOC_OS03G15900	--	--	Cellular Component: nucleus (GO:0005634);; Cellular Component: cytosol (GO:0005829);; Cellular Component: plasma membrane (GO:0005886);;	--	--	--	--	Variant SH3 domain;; SH3 domain	--	S	Function unknown	PREDICTED: uncharacterized protein LOC4332351 [Oryza sativa Japonica Group]	+	8	1	8786012
LOC_OS10G30750	--	--	Cellular Component: mitochondrion (GO:0005739);;	--	--	[BK]	--	Divergent CRAL/TRIO domain;; Macro domain;; CRAL/TRIO domain	--	S	Function unknown	Os10g0444400, partial [Oryza sativa Japonica Group]	+	5	1	16021276
LOC_OS03G04140	--	--	Biological Process: sulfate assimilation (GO:0000103);; Cellular Component: cytosol (GO:0005829);; Biological Process: cysteine biosynthetic process from serine (GO:0006535);; Biological Process: protein targeting to membrane (GO:0006612);; Molecular Function: serine O-acetyltransferase activity (GO:0009001);; Biological Process: response to wounding (GO:0009611);; Biological Process: response to…	K00640|0|osa:4331528|Os03g0133900; K00640 serine O-acetyltransferase [EC:2.3.1.30] (A)	ko00270:Cysteine and methionine metabolism;ko00920:Sulfur metabolism;ko01200:Carbon metabolism;ko01230:Biosynthesis of amino acids	[E]	Amino acid transport and metabolism	Serine acetyltransferase, N-terminal;; Bacterial transferase hexapeptide (six repeats)	Probable serine acetyltransferase 2 OS=Oryza sativa subsp. japonica OX=39947 GN=SAT2 PE=2 SV=1	E	Amino acid transport and metabolism	PREDICTED: probable serine acetyltransferase 2 [Oryza sativa Japonica Group]	-	3	1	1892832
LOC_OS01G45090	--	--	Molecular Function: DNA binding (GO:0003677);; Molecular Function: chromatin binding (GO:0003682);; Molecular Function: sequence-specific DNA binding transcription factor activity (GO:0003700);; Cellular Component: nucleus (GO:0005634);; Biological Process: polyamine catabolic process (GO:0006598);; Biological Process: oligopeptide transport (GO:0006857);; Biological Process: toxin catabolic proc…	K09422|1.75272e-145|dosa:Os01t0637800-00|Os01g0637800; Similar to Transcription factor (Fragment).; K09422 myb proto-oncogene protein, plant (A)	--	[K]	Transcription	Myb-like DNA-binding domain;; Myb-like DNA-binding domain	Transcription factor MYB21 OS=Arabidopsis thaliana OX=3702 GN=MYB21 PE=1 SV=1	K	Transcription	Os01g0637800, partial [Oryza sativa Japonica Group]	+	4	1	25593918
LOC_OS07G17130	--	--	Biological Process: autophagy (GO:0006914);; Biological Process: organelle organization (GO:0006996);; Biological Process: signal transduction (GO:0007165);; Biological Process: multicellular organismal development (GO:0007275);; Molecular Function: zinc ion binding (GO:0008270);; Molecular Function: phosphatidylinositol phosphate kinase activity (GO:0016307);; Molecular Function: phosphatidylino…	--	--	[S]	Function unknown	Las17-binding protein actin regulator;; FYVE zinc finger	Protein FREE1 OS=Arabidopsis thaliana OX=3702 GN=FREE1 PE=1 SV=1	S	Function unknown	PREDICTED: uncharacterized protein LOC4342899 [Oryza sativa Japonica Group]	+	3	1	10067804
LOC_OS05G37820	--	--	Molecular Function: inorganic phosphate transmembrane transporter activity (GO:0005315);; Molecular Function: sugar:proton symporter activity (GO:0005351);; Biological Process: cellular aromatic compound metabolic process (GO:0006725);; Biological Process: signal transduction (GO:0007165);; Molecular Function: organic anion transmembrane transporter activity (GO:0008514);; Biological Process: res…	--	--	[G]	Carbohydrate transport and metabolism	Major Facilitator Superfamily;; Sugar (and other) transporter	Probable anion transporter 2, chloroplastic OS=Oryza sativa subsp. japonica OX=39947 GN=PHT4;2 PE=2 SV=1	G	Carbohydrate transport and metabolism	PREDICTED: probable anion transporter 2, chloroplastic [Oryza sativa Japonica Group]	+	4	1	22159703
LOC_OS01G41630	--	--	Cellular Component: protein phosphatase type 2A complex (GO:0000159);; Molecular Function: nucleotide binding (GO:0000166);; Cellular Component: cytosol (GO:0005829);; Biological Process: protein dephosphorylation (GO:0006470);; Biological Process: signal transduction (GO:0007165);; Molecular Function: protein phosphatase type 2A regulator activity (GO:0008601);;	--	--	[T]	Signal transduction mechanisms	WD domain, G-beta repeat;; Anaphase-promoting complex subunit 4 WD40 domain	Serine/threonine protein phosphatase 2A 55 kDa regulatory subunit B beta isoform OS=Oryza sativa subsp. japonica OX=39947 GN=Os02g0224200 PE=2 SV=1	T	Signal transduction mechanisms	PREDICTED: serine/threonine protein phosphatase 2A 55 kDa regulatory subunit B beta isoform-like [Oryza sativa Japonica Group]	+	3	1	23576521
LOC_OS04G56700	--	--	Molecular Function: iron ion binding (GO:0005506);; Cellular Component: cytoplasm (GO:0005737);; Biological Process: anthocyanin-containing compound biosynthetic process (GO:0009718);; Biological Process: response to sucrose (GO:0009744);; Biological Process: response to UV-B (GO:0010224);; Molecular Function: oxidoreductase activity, acting on single donors with incorporation of molecular oxygen…	--	--	[QR]	--	2OG-Fe(II) oxygenase superfamily;; non-haem dioxygenase in morphine synthesis N-terminal	Flavanone 3-dioxygenase 1 OS=Oryza sativa subsp. japonica OX=39947 GN=F3H-1 PE=1 SV=2	S	Function unknown	PREDICTED: naringenin,2-oxoglutarate 3-dioxygenase [Oryza sativa Japonica Group]	-	10	1	33809419
LOC_OS02G47220	--	--	Biological Process: mitotic cell cycle (GO:0000278);; Biological Process: mRNA splicing, via spliceosome (GO:0000398);; Biological Process: cytokinesis (GO:0000910);; Molecular Function: cyclin-dependent protein serine/threonine kinase activity (GO:0004693);; Molecular Function: protein binding (GO:0005515);; Molecular Function: ATP binding (GO:0005524);; Cellular Component: nucleus (GO:0005634);…	--	--	[T]	Signal transduction mechanisms	Protein kinase domain;; Protein tyrosine kinase	Cyclin-dependent kinase F-4 OS=Oryza sativa subsp. japonica OX=39947 GN=CDKF-4 PE=2 SV=1	T	Signal transduction mechanisms	PREDICTED: cyclin-dependent kinase F-4 [Oryza sativa Japonica Group]	+	21	4	2.88266e+31
LOC_OS01G12540	--	--	Molecular Function: GTP binding (GO:0005525);; Cellular Component: mitochondrion (GO:0005739);;	--	--	[J]	Translation, ribosomal structure and biogenesis	KH-domain-like of EngA bacterial GTPase enzymes, C-terminal;; 50S ribosome-binding GTPase;; Ferrous iron transport protein B;; Elongation factor Tu GTP binding domain	Probable tRNA modification GTPase MnmE OS=Cyanidium caldarium OX=2771 GN=mnmE PE=3 SV=1	S	Function unknown	PREDICTED: GTPase Der [Oryza sativa Japonica Group]	+	2	1	6904189
LOC_OS02G33610	--	--	Molecular Function: DNA binding (GO:0003677);; Molecular Function: chromatin binding (GO:0003682);; Molecular Function: RNA binding (GO:0003723);; Molecular Function: protein binding (GO:0005515);; Cellular Component: nucleolus (GO:0005730);; Cellular Component: chloroplast (GO:0009507);; Biological Process: embryo development ending in seed dormancy (GO:0009793);; Biological Process: response to…	--	--	[A]	RNA processing and modification	Myb/SANT-like DNA-binding domain;; Beta-lactamase superfamily domain;; Metallo-beta-lactamase superfamily;; Zn-dependent metallo-hydrolase RNA specificity domain	Trihelix transcription factor GT-3b OS=Arabidopsis thaliana OX=3702 GN=GT-3B PE=1 SV=1	S	Function unknown	PREDICTED: ribonuclease J isoform X1 [Oryza sativa Japonica Group]	+	6	1	20013825
LOC_OS02G57120	--	--	Cellular Component: spindle microtubule (GO:0005876);; Cellular Component: plasma membrane (GO:0005886);; Cellular Component: cell cortex (GO:0005938);; Biological Process: polysaccharide metabolic process (GO:0005976);; Biological Process: negative regulation of microtubule depolymerization (GO:0007026);; Biological Process: mitotic nuclear division (GO:0007067);; Cellular Component: plasmodesma…	K16578|0|osa:4331138|Os02g0816300; K16578 CLIP-associating protein 1/2 (A)	--	[R]	General function prediction only	CLASP N terminal;; HEAT repeat;; HEAT repeats;; non-SMC mitotic condensation complex subunit 1;; Vacuolar 14 Fab1-binding region	CLIP-associated protein OS=Arabidopsis thaliana OX=3702 GN=CLASP PE=1 SV=1	U	Intracellular trafficking, secretion, and vesicular transport	PREDICTED: CLIP-associated protein isoform X2 [Oryza sativa Japonica Group]	+	10	2	3498987434989820
LOC_OS02G48350	--	--	Molecular Function: diacylglycerol O-acyltransferase activity (GO:0004144);; Biological Process: metabolic process (GO:0008152);; Cellular Component: chloroplast (GO:0009507);; Molecular Function: transferase activity, transferring acyl groups other than amino-acyl groups (GO:0016747);; Biological Process: triglyceride biosynthetic process (GO:0019432);;	K14457|0|osa:4330511|Os02g0714100; K14457 2-acylglycerol O-acyltransferase 2 [EC:2.3.1.22] (A)	ko00561:Glycerolipid metabolism	[I]	Lipid transport and metabolism	Diacylglycerol acyltransferase	Diacylglycerol O-acyltransferase 2D OS=Glycine max OX=3847 GN=DGAT2D PE=1 SV=1	S	Function unknown	PREDICTED: diacylglycerol O-acyltransferase 2 [Oryza sativa Japonica Group]	-	7	1	29599146
LOC_OS02G48100	--	--	Molecular Function: nucleic acid binding (GO:0003676);; Molecular Function: ATP-dependent DNA helicase activity (GO:0004003);; Molecular Function: ATP binding (GO:0005524);; Biological Process: DNA repair (GO:0006281);; Biological Process: DNA recombination (GO:0006310);; Cellular Component: cytoplasmic membrane-bounded vesicle (GO:0016023);;	K03655|0|osa:4330491|Os02g0710800; K03655 ATP-dependent DNA helicase RecG [EC:3.6.4.12] (A)	ko03440:Homologous recombination	[A]	RNA processing and modification	Helicase conserved C-terminal domain;; DEAD/DEAH box helicase	ATP-dependent DNA helicase homolog RECG, chloroplastic OS=Arabidopsis thaliana OX=3702 GN=RECG PE=3 SV=1	L	Replication, recombination and repair	PREDICTED: ATP-dependent DNA helicase homolog RECG, chloroplastic isoform X1 [Oryza sativa Japonica Group]	+	3	1	29451424
LOC_OS06G36390	--	--	--	--	--	[K]	Transcription	--	--	--	--	hypothetical protein OsJ_21689 [Oryza sativa Japonica Group]	+	5	1	21374041
LOC_OS03G49600	--	--	Molecular Function: glucan exo-1,3-beta-glucosidase activity (GO:0004338);; Molecular Function: beta-galactosidase activity (GO:0004565);; Molecular Function: beta-mannosidase activity (GO:0004567);; Cellular Component: extracellular region (GO:0005576);; Cellular Component: mitochondrion (GO:0005739);; Biological Process: carbohydrate metabolic process (GO:0005975);; Molecular Function: zinc ion…	K05350|0|osa:4333841|Os03g0703000; K05350 beta-glucosidase [EC:3.2.1.21] (A)	ko00460:Cyanoamino acid metabolism;ko00500:Starch and sucrose metabolism;ko00940:Phenylpropanoid biosynthesis	[G]	Carbohydrate transport and metabolism	Glycosyl hydrolase family 1	Beta-glucosidase 7 OS=Oryza sativa subsp. japonica OX=39947 GN=BGLU7 PE=1 SV=1	G	Carbohydrate transport and metabolism	PREDICTED: beta-glucosidase 7 [Oryza sativa Japonica Group]	-	67	5	2.82404e+39
LOC_OS02G22140	--	--	Biological Process: microtubule cytoskeleton organization (GO:0000226);; Molecular Function: DNA binding (GO:0003677);; Molecular Function: sequence-specific DNA binding transcription factor activity (GO:0003700);; Molecular Function: GTPase activity (GO:0003924);; Molecular Function: transporter activity (GO:0005215);; Molecular Function: protein binding (GO:0005515);; Molecular Function: GTP bi…	K07943|3.09517e-120|osa:4329193|Os02g0327100; K07943 ADP-ribosylation factor-like protein 2 (A)	--	[UZ]	--	ADP-ribosylation factor family;; Ras of Complex, Roc, domain of DAPkinase;; Ras family;; Signal recognition particle receptor beta subunit;; Gtr1/RagA G protein conserved region;; 50S ribosome-binding GTPase	ADP-ribosylation factor-like protein 2 OS=Arabidopsis thaliana OX=3702 GN=ARL2 PE=2 SV=1	S	Function unknown	PREDICTED: ADP-ribosylation factor-like protein 2 [Oryza sativa Japonica Group]	-	4	1	13179049
LOC_OS08G06550	--	--	Molecular Function: fatty-acyl-CoA binding (GO:0000062);; Molecular Function: protein binding (GO:0005515);; Cellular Component: extracellular space (GO:0005615);; Cellular Component: nucleus (GO:0005634);; Cellular Component: cytosol (GO:0005829);; Cellular Component: plasma membrane (GO:0005886);; Biological Process: chromatin silencing (GO:0006342);; Biological Process: calcium ion transport (…	--	--	[I]	Lipid transport and metabolism	Acyl CoA binding protein	Acyl-CoA-binding domain-containing protein 1 OS=Oryza sativa subsp. japonica OX=39947 GN=ACBP1 PE=1 SV=1	I	Lipid transport and metabolism	PREDICTED: acyl-CoA-binding protein [Oryza sativa Japonica Group]	-	30	3	3.69835e+20
LOC_OS01G72009	--	--	Cellular Component: plasma membrane (GO:0005886);; Biological Process: protein targeting to membrane (GO:0006612);; Biological Process: positive regulation of flavonoid biosynthetic process (GO:0009963);; Biological Process: regulation of plant-type hypersensitive response (GO:0010363);;	--	--	--	--	Cysteine-rich TM module stress tolerance	--	S	Function unknown	unknown protein [Oryza sativa Japonica Group]	-	29	5	4.17287e+39
LOC_OS01G60740	--	--	Molecular Function: calmodulin binding (GO:0005516);; Cellular Component: plasma membrane (GO:0005886);; Biological Process: transport (GO:0006810);; Biological Process: lipid transport (GO:0006869);; Molecular Function: lipid binding (GO:0008289);; Cellular Component: plant-type cell wall (GO:0009505);; Cellular Component: chloroplast thylakoid (GO:0009534);; Cellular Component: cytoplasmic memb…	--	--	--	--	Protease inhibitor/seed storage/LTP family;; Probable lipid transfer	Non-specific lipid-transfer protein 6 OS=Lens culinaris OX=3864 PE=1 SV=1	U	Intracellular trafficking, secretion, and vesicular transport	PREDICTED: non-specific lipid-transfer protein 1 [Oryza sativa Japonica Group]	-	41	3	3.513e+23
LOC_OS02G46962	--	--	Cellular Component: intracellular (GO:0005622);; Cellular Component: plasma membrane (GO:0005886);; Biological Process: intracellular protein transport (GO:0006886);;	--	--	[U]	Intracellular trafficking, secretion, and vesicular transport	VHS domain;; GAT domain	TOM1-like protein 1 OS=Arabidopsis thaliana OX=3702 GN=TOL1 PE=1 SV=1	S	Function unknown	PREDICTED: TOM1-like protein 2 [Oryza sativa Japonica Group]	+	25	3	2.86769e+23
LOC_OS03G13170	--	--	Biological Process: RNA methylation (GO:0001510);; Molecular Function: structural constituent of ribosome (GO:0003735);; Cellular Component: nucleus (GO:0005634);; Cellular Component: nucleolus (GO:0005730);; Cellular Component: ribosome (GO:0005840);; Biological Process: translation (GO:0006412);; Biological Process: embryo development ending in seed dormancy (GO:0009793);; Biological Process: p…	K02927|3.15904e-90|osa:4347896|Os09g0568400; K02927 large subunit ribosomal protein L40e (A)	ko03010:Ribosome	[J]	Translation, ribosomal structure and biogenesis	Ubiquitin family;; Ribosomal L40e family;; Ubiquitin-2 like Rad60 SUMO-like;; Ubiquitin-like domain	Ubiquitin-60S ribosomal protein L40-2 OS=Oryza sativa subsp. japonica OX=39947 GN=Ub-CEP52-2 PE=3 SV=1	J	Translation, ribosomal structure and biogenesis	PREDICTED: ubiquitin-60S ribosomal protein L40-2 [Oryza brachyantha]	-	21	2	71021767102148
LOC_OS01G15350	--	--	Molecular Function: DNA binding (GO:0003677);; Cellular Component: nucleus (GO:0005634);; Cellular Component: cytosol (GO:0005829);; Biological Process: regulation of transcription, DNA-templated (GO:0006355);; Molecular Function: phytochrome binding (GO:0010313);; Biological Process: negative regulation of translation (GO:0017148);; Molecular Function: metal ion binding (GO:0046872);; Molecular …	--	--	[R]	General function prediction only	Zinc finger C-x8-C-x5-C-x3-H type (and similar);; RNA-binding, Nab2-type zinc finger	Zinc finger CCCH domain-containing protein 5 OS=Oryza sativa subsp. japonica OX=39947 GN=Os01g0257400 PE=2 SV=1	S	Function unknown	PREDICTED: zinc finger CCCH domain-containing protein 5 [Oryza sativa Japonica Group]	-	8	1	8593844
LOC_OS01G43070	--	--	Biological Process: maltose metabolic process (GO:0000023);; Molecular Function: calcium ion binding (GO:0005509);; Cellular Component: chloroplast thylakoid membrane (GO:0009535);; Cellular Component: chloroplast thylakoid lumen (GO:0009543);; Cellular Component: thylakoid (GO:0009579);; Cellular Component: photosystem II oxygen evolving complex (GO:0009654);; Biological Process: thylakoid membr…	--	--	--	--	PsbP	PsbP domain-containing protein 5, chloroplastic OS=Arabidopsis thaliana OX=3702 GN=PPD5 PE=1 SV=3	S	Function unknown	hypothetical protein OsI_02877 [Oryza sativa Indica Group]	+	13	3	2.45755e+23
LOC_OS02G53330	--	--	Molecular Function: catalytic activity (GO:0003824);; Cellular Component: mitochondrion (GO:0005739);; Cellular Component: cytosol (GO:0005829);; Biological Process: gluconeogenesis (GO:0006094);; Biological Process: glycolytic process (GO:0006096);; Biological Process: metabolic process (GO:0008152);; Molecular Function: 1-aminocyclopropane-1-carboxylate deaminase activity (GO:0008660);; Cellula…	--	--	--	--	Pyridoxal-phosphate dependent enzyme	Putative D-cysteine desulfhydrase 1, mitochondrial OS=Oryza sativa subsp. japonica OX=39947 GN=Os02g0773300 PE=2 SV=2	E	Amino acid transport and metabolism	PREDICTED: putative D-cysteine desulfhydrase 1, mitochondrial [Oryza sativa Japonica Group]	-	11	2	3264500632644970
LOC_OS05G49770	--	--	Molecular Function: CTP synthase activity (GO:0003883);; Biological Process: pyrimidine nucleotide biosynthetic process (GO:0006221);; Cellular Component: cytoplasmic membrane-bounded vesicle (GO:0016023);;	K01937|0|osa:4339675|Os05g0573300; K01937 CTP synthase [EC:6.3.4.2] (A)	ko00240:Pyrimidine metabolism	[F]	Nucleotide transport and metabolism	CTP synthase N-terminus;; Glutamine amidotransferase class-I;; Peptidase C26	--	F	Nucleotide transport and metabolism	PREDICTED: CTP synthase [Oryza sativa Japonica Group]	-	13	2	2855132028551480
LOC_OS06G46380	--	--	Molecular Function: prenyltransferase activity (GO:0004659);; Molecular Function: protein prenyltransferase activity (GO:0008318);; Biological Process: cellular process (GO:0009987);; Biological Process: protein prenylation (GO:0018342);; Biological Process: response to cadmium ion (GO:0046686);;	K14050|0|osa:4341838|Os06g0677500; K14050 geranylgeranyl transferase type-2 subunit alpha [EC:2.5.1.60] (A)	--	[O]	Posttranslational modification, protein turnover, chaperones	Protein prenyltransferase alpha subunit repeat;; Leucine Rich repeats (2 copies)	Geranylgeranyl transferase type-2 subunit alpha 1 OS=Arabidopsis thaliana OX=3702 GN=RGTA1 PE=1 SV=1	O	Posttranslational modification, protein turnover, chaperones	PREDICTED: geranylgeranyl transferase type-2 subunit alpha [Oryza sativa Japonica Group]	+	5	2	2814833028148300
LOC_OS03G31090	--	--	Biological Process: RNA methylation (GO:0001510);; Molecular Function: nucleic acid binding (GO:0003676);; Molecular Function: structural constituent of ribosome (GO:0003735);; Cellular Component: cell wall (GO:0005618);; Cellular Component: nucleolus (GO:0005730);; Cellular Component: vacuole (GO:0005773);; Biological Process: translation (GO:0006412);; Molecular Function: zinc ion binding (GO:0…	K02966|4.0791e-104|osa:4333148|Os03g0424500; K02966 small subunit ribosomal protein S19e (A)	ko03010:Ribosome	[J]	Translation, ribosomal structure and biogenesis	Ribosomal protein S19e	40S ribosomal protein S19 OS=Oryza sativa subsp. japonica OX=39947 GN=RPS19A PE=2 SV=1	J	Translation, ribosomal structure and biogenesis	PREDICTED: 40S ribosomal protein S19 [Oryza sativa Japonica Group]	+	15	2	1771671417716730
LOC_OS07G38460	--	--	Cellular Component: plastid (GO:0009536);;	--	--	--	--	Plant protein of unknown function (DUF868)	--	S	Function unknown	PREDICTED: uncharacterized protein LOC4343674 [Oryza sativa Japonica Group]	+	3	1	23108161
LOC_OS04G35570	--	--	Cellular Component: chromatin (GO:0000785);; Molecular Function: chromatin binding (GO:0003682);; Molecular Function: guanyl-nucleotide exchange factor activity (GO:0005085);; Cellular Component: nucleus (GO:0005634);; Cellular Component: cytosol (GO:0005829);; Biological Process: glucose catabolic process (GO:0006007);; Biological Process: entrainment of circadian clock (GO:0009649);; Biological…	--	--	[S]	Function unknown	Regulator of chromosome condensation (RCC1) repeat;; Regulator of chromosome condensation (RCC1) repeat	Ultraviolet-B receptor UVR8 OS=Arabidopsis thaliana OX=3702 GN=UVR8 PE=1 SV=1	DZ	--	PREDICTED: ultraviolet-B receptor UVR8 [Oryza sativa Japonica Group]	+	39	2	2168812221688090
LOC_OS06G22654	--	--	Cellular Component: mitochondrion (GO:0005739);; Cellular Component: plastid (GO:0009536);; Molecular Function: hydrolase activity (GO:0016787);; Biological Process: organic substance metabolic process (GO:0071704);;	--	--	--	--	--	--	S	Function unknown	hypothetical protein OsI_22804 [Oryza sativa Indica Group]	-	3	1	13172338
LOC_OS02G19440	--	--	Biological Process: response to oxidative stress (GO:0006979);; Biological Process: cobalamin biosynthetic process (GO:0009236);; Cellular Component: chloroplast (GO:0009507);; Biological Process: siroheme biosynthetic process (GO:0019354);; Molecular Function: metal ion binding (GO:0046872);; Molecular Function: sirohydrochlorin ferrochelatase activity (GO:0051266);;	--	--	--	--	CbiX	Sirohydrochlorin ferrochelatase, chloroplastic OS=Arabidopsis thaliana OX=3702 GN=SIRB PE=1 SV=1	H	Coenzyme transport and metabolism	PREDICTED: sirohydrochlorin ferrochelatase isoform X1 [Oryza sativa Japonica Group]	-	4	1	11353286
LOC_OS01G53730	--	--	--	--	--	[K]	Transcription	--	--	S	Function unknown	PREDICTED: uncharacterized protein LOC4327202 [Oryza sativa Japonica Group]	-	11	2	3088539230885440
LOC_OS02G51790	--	--	Molecular Function: structural constituent of ribosome (GO:0003735);; Cellular Component: ribosome (GO:0005840);; Biological Process: DNA-templated transcription, elongation (GO:0006354);; Biological Process: translation (GO:0006412);; Cellular Component: nucleoid (GO:0009295);; Cellular Component: chloroplast stroma (GO:0009570);; Cellular Component: chloroplast envelope (GO:0009941);; Molecular…	K02904|7.08066e-73|osa:4330763|Os02g0754300; K02904 large subunit ribosomal protein L29 (A)	ko03010:Ribosome	[J]	Translation, ribosomal structure and biogenesis	Ribosomal L29 protein	50S ribosomal protein L29, chloroplastic OS=Zea mays OX=4577 GN=RPL29 PE=2 SV=1	J	Translation, ribosomal structure and biogenesis	PREDICTED: 50S ribosomal protein L29, chloroplastic [Oryza sativa Japonica Group]	+	10	2	3172138531721460
LOC_OS03G52700	--	--	Biological Process: mitotic G2 phase (GO:0000085);; Molecular Function: ubiquitin-protein transferase activity (GO:0004842);; Cellular Component: nucleus (GO:0005634);; Cellular Component: cytoplasm (GO:0005737);; Biological Process: DNA methylation (GO:0006306);; Biological Process: chromatin silencing (GO:0006342);; Biological Process: methylation-dependent chromatin silencing (GO:0006346);; Bi…	--	--	--	--	Nuclear pore complex assembly	E3 ubiquitin-protein ligase HOS1 OS=Arabidopsis thaliana OX=3702 GN=HOS1 PE=1 SV=1	S	Function unknown	PREDICTED: E3 ubiquitin-protein ligase HOS1 [Oryza sativa Japonica Group]	-	4	1	30215437
LOC_OS05G47780	--	--	Molecular Function: zinc ion binding (GO:0008270);;	K16276|0|osa:4339530|Os05g0551000; K16276 zinc finger protein-like protein (A)	--	[R]	General function prediction only	Zinc-ribbon;; CHY zinc finger;; Hemerythrin HHE cation binding domain;; Ring finger domain	Zinc finger protein BRUTUS OS=Arabidopsis thaliana OX=3702 GN=BTS PE=1 SV=1	S	Function unknown	PREDICTED: uncharacterized protein LOC4339530 isoform X1 [Oryza sativa Japonica Group]	+	6	2	2738219627382160
LOC_OS10G33970	--	--	Biological Process: developmental process involved in reproduction (GO:0003006);; Molecular Function: double-stranded RNA binding (GO:0003725);; Molecular Function: catalytic activity (GO:0003824);; Molecular Function: protein binding (GO:0005515);; Cellular Component: cytoplasm (GO:0005737);; Biological Process: anatomical structure morphogenesis (GO:0009653);; Biological Process: response to au…	--	--	--	--	Double-stranded RNA binding motif	Double-stranded RNA-binding protein 6 OS=Oryza sativa subsp. japonica OX=39947 GN=DRB6 PE=2 SV=1	S	Function unknown	PREDICTED: double-stranded RNA-binding protein 6 [Oryza sativa Japonica Group]	-	10	3	1.81029e+23
LOC_OS08G04130	--	--	Molecular Function: ubiquitin-protein transferase activity (GO:0004842);; Cellular Component: nucleus (GO:0005634);; Cellular Component: mitochondrion (GO:0005739);; Cellular Component: plasma membrane (GO:0005886);; Biological Process: protein N-linked glycosylation (GO:0006487);; Biological Process: calcium ion transport (GO:0006816);; Molecular Function: zinc ion binding (GO:0008270);; Biologi…	K16280|0|osa:4344608|Os08g0135400; K16280 E3 ubiquitin-protein ligase RGLG [EC:6.3.2.19] (A)	--	[T]	Signal transduction mechanisms	Copine;; Zinc finger, C3HC4 type (RING finger)	E3 ubiquitin-protein ligase RGLG4 OS=Arabidopsis thaliana OX=3702 GN=RGLG4 PE=1 SV=1	S	Function unknown	PREDICTED: E3 ubiquitin-protein ligase RGLG2 [Oryza sativa Japonica Group]	+	11	2	20115252011650
LOC_OS09G31466	--	--	--	--	--	--	--	--	--	S	Function unknown	PREDICTED: uncharacterized protein LOC9267449 [Oryza sativa Japonica Group]	-	4	1	18962154
LOC_OS01G66200	--	--	--	--	--	--	--	--	Protein WVD2-like 7 OS=Arabidopsis thaliana OX=3702 GN=WDL7 PE=2 SV=1	S	Function unknown	PREDICTED: uncharacterized protein DDB_G0284459 [Oryza sativa Japonica Group]	-	18	3	3.84549e+23
LOC_OS05G50080	--	--	Molecular Function: DNA binding (GO:0003677);; Biological Process: regulation of transcription, DNA-templated (GO:0006355);; Cellular Component: intrinsic component of membrane (GO:0031224);; Cellular Component: intracellular membrane-bounded organelle (GO:0043231);; Molecular Function: metal ion binding (GO:0046872);; Cellular Component: cell periphery (GO:0071944);;	--	--	[R]	General function prediction only	Zinc finger C-x8-C-x5-C-x3-H type (and similar)	Zinc finger CCCH domain-containing protein 39 OS=Oryza sativa subsp. japonica OX=39947 GN=Os05g0576300 PE=2 SV=1	S	Function unknown	PREDICTED: zinc finger CCCH domain-containing protein 39 [Oryza sativa Japonica Group]	+	6	1	28704604
LOC_OS02G39300	--	--	Biological Process: mRNA splicing, via spliceosome (GO:0000398);; Molecular Function: catalytic activity (GO:0003824);; Molecular Function: protein binding (GO:0005515);; Cellular Component: nucleus (GO:0005634);; Cellular Component: cytoplasm (GO:0005737);; Biological Process: regulation of transcription, DNA-templated (GO:0006355);; Biological Process: cellular protein modification process (GO:…	--	--	[A]	RNA processing and modification	LUC7 N_terminus	--	A	RNA processing and modification	PREDICTED: putative RNA-binding protein Luc7-like 2 isoform X1 [Oryza sativa Japonica Group]	+	4	1	23734370
LOC_OS05G08610	--	--	Molecular Function: ubiquitin-protein transferase activity (GO:0004842);; Molecular Function: zinc ion binding (GO:0008270);; Biological Process: response to brassinosteroid (GO:0009741);; Cellular Component: membrane (GO:0016020);; Biological Process: protein ubiquitination (GO:0016567);; Cellular Component: intracellular membrane-bounded organelle (GO:0043231);; Cellular Component: cytoplasmic …	--	--	[O]	Posttranslational modification, protein turnover, chaperones	Ring finger domain;; RING-like zinc finger;; Zinc finger, C3HC4 type (RING finger);; Zinc finger, C3HC4 type (RING finger)	E3 ubiquitin-protein ligase At1g12760 OS=Arabidopsis thaliana OX=3702 GN=At1g12760 PE=1 SV=1	O	Posttranslational modification, protein turnover, chaperones	PREDICTED: E3 ubiquitin-protein ligase At1g63170 [Oryza sativa Japonica Group]	+	8	2	47153714715352
LOC_OS03G63410	--	--	Molecular Function: translation elongation factor activity (GO:0003746);; Molecular Function: GTPase activity (GO:0003924);; Molecular Function: ATP binding (GO:0005524);; Molecular Function: GTP binding (GO:0005525);; Cellular Component: cell wall (GO:0005618);; Cellular Component: nucleus (GO:0005634);; Cellular Component: mitochondrion (GO:0005739);; Cellular Component: cytosol (GO:0005829);; …	K02358|0|osa:4334800|Os03g0851100; K02358 elongation factor Tu (A)	--	[J]	Translation, ribosomal structure and biogenesis	Elongation factor Tu GTP binding domain;; Elongation factor Tu C-terminal domain;; Elongation factor Tu domain 2;; 50S ribosome-binding GTPase	Elongation factor Tu, mitochondrial OS=Arabidopsis thaliana OX=3702 GN=TUFA PE=1 SV=1	J	Translation, ribosomal structure and biogenesis	PREDICTED: elongation factor Tu, mitochondrial [Oryza sativa Japonica Group]	-	9	1	35826443
LOC_OS01G68810	--	--	Molecular Function: phosphorelay sensor kinase activity (GO:0000155);; Biological Process: phosphorelay signal transduction system (GO:0000160);; Cellular Component: membrane (GO:0016020);; Biological Process: signal transduction by phosphorylation (GO:0023014);;	K12879|0|osa:4324336|Os01g0916800; K12879 THO complex subunit 2 (A)	ko03013:RNA transport;ko03040:Spliceosome	[K]	Transcription	Transcription factor/nuclear export subunit protein 2;; THO complex subunit 2 N-terminus;; Transcription- and export-related complex subunit	THO complex subunit 2 OS=Arabidopsis thaliana OX=3702 GN=THO2 PE=1 SV=1	S	Function unknown	putative THO complex 2 [Oryza sativa Japonica Group]	-	5	1	39960286
LOC_OS04G28620	--	--	Biological Process: mitotic cell cycle (GO:0000278);; Biological Process: double-strand break repair via homologous recombination (GO:0000724);; Molecular Function: sequence-specific DNA binding transcription factor activity (GO:0003700);; Molecular Function: protein binding (GO:0005515);; Cellular Component: nucleus (GO:0005634);; Cellular Component: endoplasmic reticulum (GO:0005783);; Cellular…	K13356|0|osa:4335562|Os04g0354600; K13356 fatty acyl-CoA reductase [EC:1.2.1.-] (A)	ko00073:Cutin, suberine and wax biosynthesis;ko04146:Peroxisome	[I]	Lipid transport and metabolism	Male sterility protein;; Male sterility protein;; NAD dependent epimerase/dehydratase family	Fatty acyl-CoA reductase 1 OS=Arabidopsis thaliana OX=3702 GN=FAR1 PE=1 SV=1	S	Function unknown	PREDICTED: fatty acyl-CoA reductase 1 [Oryza sativa Japonica Group]	+	3	1	16951514
LOC_OS03G60100	--	--	Molecular Function: RNA binding (GO:0003723);; Molecular Function: structural constituent of ribosome (GO:0003735);; Cellular Component: ribosome (GO:0005840);; Biological Process: translation (GO:0006412);; Cellular Component: chloroplast stroma (GO:0009570);; Cellular Component: chloroplast envelope (GO:0009941);; Biological Process: isopentenyl diphosphate biosynthetic process, methylerythrito…	K02879|2.56371e-137|osa:4334555|Os03g0815400; K02879 large subunit ribosomal protein L17 (A)	ko03010:Ribosome	[J]	Translation, ribosomal structure and biogenesis	Ribosomal protein L17	50S ribosomal protein L17, chloroplastic OS=Arabidopsis thaliana OX=3702 GN=RPL17 PE=2 SV=1	J	Translation, ribosomal structure and biogenesis	PREDICTED: 50S ribosomal protein L17 [Oryza sativa Japonica Group]	+	11	3	3.41766e+23
LOC_OS06G05820	--	--	Molecular Function: DNA helicase activity (GO:0003678);; Molecular Function: damaged DNA binding (GO:0003684);; Molecular Function: catalytic activity (GO:0003824);; Molecular Function: ATP-dependent peptidase activity (GO:0004176);; Molecular Function: serine-type endopeptidase activity (GO:0004252);; Molecular Function: ATP binding (GO:0005524);; Biological Process: DNA replication (GO:0006260)…	K04485|0|osa:4340150|Os06g0151600; K04485 DNA repair protein RadA/Sms (A)	--	--	--	AAA domain;; Subunit ChlI of Mg-chelatase;; DnaB-like helicase C terminal domain;; Lon protease (S16) C-terminal proteolytic domain;; KaiC;; ATPase family associated with various cellular activities (AAA)	--	O	Posttranslational modification, protein turnover, chaperones	PREDICTED: DNA repair protein RadA homolog [Oryza sativa Japonica Group]	+	2	1	2661310
LOC_OS06G07080	--	--	Biological Process: mRNA splicing, via spliceosome (GO:0000398);; Cellular Component: spliceosomal complex (GO:0005681);; Cellular Component: cytoplasmic membrane-bounded vesicle (GO:0016023);; Molecular Function: U6 snRNA binding (GO:0017070);; Molecular Function: U5 snRNA binding (GO:0030623);;	K12856|0|osa:4340248|Os06g0167000; K12856 pre-mRNA-processing factor 8 (A)	ko03040:Spliceosome	[A]	RNA processing and modification	PRP8 domain IV core;; U6-snRNA interacting domain of PrP8;; U5-snRNA binding site 2 of PrP8;; PROCT (NUC072) domain;; JAB1/Mov34/MPN/PAD-1 ubiquitin protease	Pre-mRNA-processing-splicing factor 8A OS=Arabidopsis thaliana OX=3702 GN=PRP8A PE=1 SV=1	A	RNA processing and modification	Os06g0167000, partial [Oryza sativa Japonica Group]	-	36	3	3.36392e+20
LOC_OS03G15410	--	--	Molecular Function: binding (GO:0005488);; Cellular Component: nuclear part (GO:0044428);; Cellular Component: cytoplasmic part (GO:0044444);;	--	--	--	--	Zein-binding	Myosin-binding protein 2 OS=Arabidopsis thaliana OX=3702 GN=MYOB2 PE=1 SV=1	S	Function unknown	PREDICTED: myosin-binding protein 2 isoform X3 [Oryza sativa Japonica Group]	+	16	3	8.43342e+20
LOC_OS02G51750	--	--	Molecular Function: peroxidase activity (GO:0004601);; Molecular Function: copper ion binding (GO:0005507);; Molecular Function: calcium ion binding (GO:0005509);; Molecular Function: ATP binding (GO:0005524);; Molecular Function: calcium-dependent phospholipid binding (GO:0005544);; Cellular Component: cell wall (GO:0005618);; Cellular Component: nucleus (GO:0005634);; Cellular Component: mitoch…	--	--	[U]	Intracellular trafficking, secretion, and vesicular transport	Annexin	Annexin D7 OS=Arabidopsis thaliana OX=3702 GN=ANNAT7 PE=2 SV=1	S	Function unknown	PREDICTED: annexin D7 [Oryza sativa Japonica Group]	-	15	1	31698203
LOC_OS01G53090	--	--	Biological Process: response to stimulus (GO:0050896);;	--	--	--	--	--	Pathogen-related protein OS=Hordeum vulgare OX=4513 PE=2 SV=2	S	Function unknown	PREDICTED: pathogen-related protein [Oryza sativa Japonica Group]	-	2	1	30512317
LOC_OS06G43590	--	--	Biological Process: embryonic axis specification (GO:0000578);; Biological Process: embryo development ending in seed dormancy (GO:0009793);; Biological Process: protein transport (GO:0015031);; Biological Process: endosome transport via multivesicular body sorting pathway (GO:0032509);; Biological Process: growth (GO:0040007);; Cellular Component: intracellular membrane-bounded organelle (GO:004…	K12197|3.95147e-116|osa:4341638|Os06g0643300; K12197 charged multivesicular body protein 1 (A)	ko04144:Endocytosis	[U]	Intracellular trafficking, secretion, and vesicular transport	Snf7	ESCRT-related protein CHMP1 OS=Oryza sativa subsp. japonica OX=39947 GN=CHMP1 PE=2 SV=1	N	Cell motility	PREDICTED: ESCRT-related protein CHMP1 [Oryza sativa Japonica Group]	+	15	2	2621860226218650
LOC_OS02G17940	--	--	Molecular Function: iron ion binding (GO:0005506);; Biological Process: response to stress (GO:0006950);; Biological Process: response to abiotic stimulus (GO:0009628);; Biological Process: ethylene biosynthetic process (GO:0009693);; Biological Process: phenylpropanoid biosynthetic process (GO:0009699);; Biological Process: response to hormone (GO:0009725);; Biological Process: flavonoid biosynt…	--	--	[QR]	--	non-haem dioxygenase in morphine synthesis N-terminal;; 2OG-Fe(II) oxygenase superfamily	Protein SRG1 OS=Arabidopsis thaliana OX=3702 GN=SRG1 PE=2 SV=1	S	Function unknown	PREDICTED: protein SRG1 [Oryza sativa Japonica Group]	+	3	1	10390312
LOC_OS01G70390	--	--	Cellular Component: plasma membrane (GO:0005886);;	--	--	--	--	Protein of unknown function (DUF3754)	--	S	Function unknown	PREDICTED: uncharacterized protein LOC4326967 [Oryza sativa Japonica Group]	+	7	2	4078457140784540
LOC_OS06G14450	--	--	Cellular Component: exocyst (GO:0000145);; Biological Process: exocytosis (GO:0006887);; Biological Process: protein localization (GO:0008104);; Biological Process: anatomical structure morphogenesis (GO:0009653);; Biological Process: cellular component organization (GO:0016043);; Biological Process: cell growth (GO:0016049);; Cellular Component: membrane-bounded organelle (GO:0043227);; Cellular…	K07195|0|osa:4340672|Os06g0255900; K07195 exocyst complex component 7 (A)	--	[U]	Intracellular trafficking, secretion, and vesicular transport	Exo70 exocyst complex subunit	Exocyst complex component EXO70A1 OS=Arabidopsis thaliana OX=3702 GN=EXO70A1 PE=1 SV=1	S	Function unknown	hypothetical protein OsJ_20858 [Oryza sativa Japonica Group]	+	7	1	8119829
LOC_OS05G48060	--	--	Molecular Function: CDP-diacylglycerol-serine O-phosphatidyltransferase activity (GO:0003882);; Cellular Component: nucleus (GO:0005634);; Cellular Component: endoplasmic reticulum membrane (GO:0005789);; Biological Process: phosphatidylserine biosynthetic process (GO:0006659);; Cellular Component: plastid (GO:0009536);;	K08730|0|dosa:Os05t0554400-01|Os05g0554400; Phosphatidyl serine synthase family protein.; K08730 phosphatidylserine synthase 2 [EC:2.7.8.29] (A)	ko00564:Glycerophospholipid metabolism	[I]	Lipid transport and metabolism	Phosphatidyl serine synthase	CDP-diacylglycerol--serine O-phosphatidyltransferase 2 OS=Oryza sativa subsp. japonica OX=39947 GN=PSS2 PE=2 SV=2	I	Lipid transport and metabolism	putative phosphatidylserine synthase [Oryza sativa Japonica Group]	+	9	3	2.75581e+23
LOC_OS02G48990	--	--	Molecular Function: aminoacyl-tRNA ligase activity (GO:0004812);; Molecular Function: transporter activity (GO:0005215);; Molecular Function: ATP binding (GO:0005524);; Cellular Component: intracellular (GO:0005622);; Cellular Component: Golgi apparatus (GO:0005794);; Cellular Component: plasma membrane (GO:0005886);; Biological Process: tRNA aminoacylation for protein translation (GO:0006418);; …	--	--	[I]	Lipid transport and metabolism	CRAL/TRIO domain;; CRAL/TRIO, N-terminal domain	Phosphatidylinositol/phosphatidylcholine transfer protein SFH6 OS=Arabidopsis thaliana OX=3702 GN=SFH6 PE=2 SV=1	S	Function unknown	PREDICTED: phosphatidylinositol/phosphatidylcholine transfer protein SFH9 isoform X1 [Oryza sativa Japonica Group]	-	6	1	29950713
LOC_OS06G21590	--	--	Biological Process: rRNA processing (GO:0006364);; Cellular Component: PSII associated light-harvesting complex II (GO:0009517);; Cellular Component: photosystem I (GO:0009522);; Cellular Component: photosystem II (GO:0009523);; Cellular Component: chloroplast stromal thylakoid (GO:0009533);; Cellular Component: chloroplast thylakoid membrane (GO:0009535);; Biological Process: response to blue li…	K08907|2.28506e-178|osa:4340892|Os06g0320500; K08907 light-harvesting complex I chlorophyll a/b binding protein 1 (A)	ko00196:Photosynthesis - antenna proteins	--	--	Chlorophyll A-B binding protein	Chlorophyll a-b binding protein 1B-21, chloroplastic OS=Hordeum vulgare OX=4513 GN=LHC Ib-21 PE=1 SV=1	O	Posttranslational modification, protein turnover, chaperones	PREDICTED: chlorophyll a-b binding protein 1B-21, chloroplastic [Oryza sativa Japonica Group]	+	77	5	1.2454e+39
LOC_OS03G60509	--	--	Cellular Component: nucleus (GO:0005634);; Cellular Component: plant-type vacuole membrane (GO:0009705);; Biological Process: flavonoid biosynthetic process (GO:0009813);; Biological Process: response to UV-B (GO:0010224);; Cellular Component: extrinsic component of endoplasmic reticulum membrane (GO:0042406);; Molecular Function: chalcone isomerase activity (GO:0045430);; Biological Process: res…	K01859|3.72127e-131|osa:4334588|Os03g0819600; K01859 chalcone isomerase [EC:5.5.1.6] (A)	ko00941:Flavonoid biosynthesis	--	--	Chalcone-flavanone isomerase	Chalcone--flavonone isomerase OS=Oryza sativa subsp. japonica OX=39947 GN=CHI PE=2 SV=1	G	Carbohydrate transport and metabolism	PREDICTED: chalcone--flavonone isomerase [Oryza sativa Japonica Group]	-	15	2	3439450134394540
LOC_OS03G14130	--	--	Biological Process: response to stress (GO:0006950);; Biological Process: response to abiotic stimulus (GO:0009628);; Biological Process: anatomical structure morphogenesis (GO:0009653);; Biological Process: response to hormone (GO:0009725);; Biological Process: post-embryonic development (GO:0009791);; Biological Process: tissue development (GO:0009888);; Cellular Component: cytoplasmic membrane…	--	--	--	--	Pollen proteins Ole e I like	Proline-rich protein 4 OS=Arabidopsis thaliana OX=3702 GN=PRP4 PE=2 SV=1	S	Function unknown	PREDICTED: proline-rich protein 2 [Oryza sativa Japonica Group]	-	5	1	7675772
LOC_OS06G48180	--	--	Molecular Function: hydrolase activity, hydrolyzing O-glycosyl compounds (GO:0004553);; Cellular Component: extracellular region (GO:0005576);; Cellular Component: cell wall (GO:0005618);; Cellular Component: Golgi apparatus (GO:0005794);; Biological Process: cellular glucan metabolic process (GO:0006073);; Biological Process: response to heat (GO:0009408);; Biological Process: response to cold (…	--	--	--	--	Glycosyl hydrolases family 16;; Xyloglucan endo-transglycosylase (XET) C-terminus	Probable xyloglucan endotransglucosylase/hydrolase protein 25 OS=Arabidopsis thaliana OX=3702 GN=XTH25 PE=2 SV=2	G	Carbohydrate transport and metabolism	PREDICTED: xyloglucan endotransglucosylase/hydrolase protein 24 [Oryza sativa Japonica Group]	+	5	1	29146559
LOC_OS12G44380	--	--	Molecular Function: maltose:proton symporter activity (GO:0005364);; Cellular Component: vacuole (GO:0005773);; Cellular Component: Golgi apparatus (GO:0005794);; Cellular Component: integral component of plasma membrane (GO:0005887);; Biological Process: sucrose metabolic process (GO:0005985);; Biological Process: oligopeptide transport (GO:0006857);; Molecular Function: sucrose:proton symporter…	--	--	[G]	Carbohydrate transport and metabolism	Major Facilitator Superfamily	Sucrose transport protein SUT2 OS=Oryza sativa subsp. japonica OX=39947 GN=SUT2 PE=2 SV=2	U	Intracellular trafficking, secretion, and vesicular transport	PREDICTED: sucrose transport protein SUT2 [Oryza sativa Japonica Group]	-	6	1	27513966
LOC_OS05G12260	--	--	Molecular Function: protein phosphatase inhibitor activity (GO:0004864);; Molecular Function: receptor activity (GO:0004872);; Cellular Component: nucleus (GO:0005634);; Cellular Component: mitochondrion (GO:0005739);; Biological Process: tryptophan catabolic process (GO:0006569);; Biological Process: response to stress (GO:0006950);; Biological Process: fatty acid catabolic process (GO:0009062);…	K14496|1.51183e-124|osa:4338104|Os05g0213500; K14496 abscisic acid receptor PYR/PYL family (A)	ko04075:Plant hormone signal transduction	--	--	Polyketide cyclase / dehydrase and lipid transport	Abscisic acid receptor PYL8 OS=Arabidopsis thaliana OX=3702 GN=PYL8 PE=1 SV=1	S	Function unknown	PREDICTED: abscisic acid receptor PYL8 [Oryza sativa Japonica Group]	+	7	1	7036597
LOC_OS09G32150	--	--	--	--	--	--	--	--	--	--	--	PREDICTED: uncharacterized protein LOC9267072 [Oryza sativa Japonica Group]	-	26	3	1.91859e+23
LOC_OS08G28980	--	--	Molecular Function: nucleic acid binding (GO:0003676);; Molecular Function: exonuclease activity (GO:0004527);; Molecular Function: 3'-5' exonuclease activity (GO:0008408);; Biological Process: nucleotide biosynthetic process (GO:0009165);; Cellular Component: plastid (GO:0009536);; Biological Process: miRNA catabolic process (GO:0010587);; Cellular Component: membrane (GO:0016020);; Cellular Com…	K18327|1.82963e-160|osa:4345430|Os08g0377400; K18327 RNA exonuclease 4 [EC:3.1.-.-] (A)	--	[L]	Replication, recombination and repair	Exonuclease	Small RNA degrading nuclease 1 OS=Arabidopsis thaliana OX=3702 GN=SDN1 PE=2 SV=1	L	Replication, recombination and repair	PREDICTED: RNA exonuclease 4 [Oryza sativa Japonica Group]	-	4	1	17730052
LOC_OS05G10210	--	--	Biological Process: defense response to insect (GO:0002213);; Molecular Function: acid phosphatase activity (GO:0003993);; Molecular Function: binding (GO:0005488);; Cellular Component: nucleoplasm (GO:0005654);; Cellular Component: vacuole (GO:0005773);; Biological Process: response to oxidative stress (GO:0006979);; Biological Process: response to wounding (GO:0009611);; Biological Process: res…	--	--	--	--	HAD superfamily, subfamily IIIB (Acid phosphatase)	Acid phosphatase 1 OS=Solanum lycopersicum OX=4081 GN=APS1 PE=2 SV=1	S	Function unknown	PREDICTED: acid phosphatase 1 [Oryza sativa Japonica Group]	-	10	1	5553735
LOC_OS07G42370	--	--	Molecular Function: protein binding (GO:0005515);; Cellular Component: chloroplast thylakoid (GO:0009534);; Biological Process: response to abiotic stimulus (GO:0009628);; Biological Process: response to jasmonic acid (GO:0009753);; Biological Process: hormone-mediated signaling pathway (GO:0009755);; Biological Process: regulation of defense response (GO:0031347);; Cellular Component: photosynth…	K13464|7.293e-162|osa:4343899|Os07g0615200; K13464 jasmonate ZIM domain-containing protein (A)	ko04075:Plant hormone signal transduction	--	--	tify domain;; Divergent CCT motif	Protein TIFY 10b OS=Oryza sativa subsp. japonica OX=39947 GN=TIFY10B PE=1 SV=1	S	Function unknown	PREDICTED: protein TIFY 10b [Oryza sativa Japonica Group]	+	95	4	2.53502e+31
LOC_OS10G31520	--	--	Molecular Function: RNA binding (GO:0003723);; Cellular Component: nucleolus (GO:0005730);; Biological Process: rRNA processing (GO:0006364);; Cellular Component: ribonucleoprotein complex (GO:0030529);;	K06961|0|osa:4348775|Os10g0452800; K06961 ribosomal RNA assembly protein (A)	--	[JD]	--	--	--	S	Function unknown	PREDICTED: KRR1 small subunit processome component homolog [Oryza sativa Japonica Group]	-	4	1	16509088
LOC_OS01G57066	--	--	Cellular Component: endoplasmic reticulum (GO:0005783);; Cellular Component: chloroplast (GO:0009507);; Cellular Component: integral component of membrane (GO:0016021);;	--	--	[R]	General function prediction only	SNARE associated Golgi protein	Vacuole membrane protein KMS1 OS=Arabidopsis thaliana OX=3702 GN=KMS1 PE=1 SV=1	S	Function unknown	PREDICTED: vacuole membrane protein KMS1 [Oryza sativa Japonica Group]	+	9	1	32963256
LOC_OS07G23930	--	--	Biological Process: cell morphogenesis (GO:0000902);; Biological Process: carbohydrate metabolic process (GO:0005975);; Biological Process: phosphate-containing compound metabolic process (GO:0006796);; Biological Process: cytoskeleton organization (GO:0007010);; Cellular Component: cytoplasmic membrane-bounded vesicle (GO:0016023);; Biological Process: organophosphate metabolic process (GO:00196…	--	--	[I]	Lipid transport and metabolism	--	Phosphoinositide phosphatase SAC2 OS=Arabidopsis thaliana OX=3702 GN=SAC2 PE=2 SV=1	--	--	hypothetical protein OsJ_23999 [Oryza sativa Japonica Group]	-	3	1	13527052
LOC_OS06G45380	--	--	Molecular Function: binding (GO:0005488);; Molecular Function: calcium ion binding (GO:0005509);; Cellular Component: nucleus (GO:0005634);; Cellular Component: endosome (GO:0005768);; Cellular Component: trans-Golgi network (GO:0005802);; Cellular Component: integral component of plasma membrane (GO:0005887);; Biological Process: protein targeting to vacuole (GO:0006623);; Biological Process: sy…	--	--	--	--	PA domain	Vacuolar-sorting receptor 6 OS=Arabidopsis thaliana OX=3702 GN=VSR6 PE=2 SV=3	U	Intracellular trafficking, secretion, and vesicular transport	PREDICTED: vacuolar-sorting receptor 6 [Oryza sativa Japonica Group]	+	40	6	2.7441e+47
LOC_OS09G35540	--	--	--	--	--	--	--	Protein of unknown function (DUF1618)	--	--	--	PREDICTED: uncharacterized protein LOC4347621 [Oryza sativa Japonica Group]	+	4	1	20425083
LOC_OS04G01140	--	--	Molecular Function: monooxygenase activity (GO:0004497);; Molecular Function: binding (GO:0005488);; Molecular Function: iron ion binding (GO:0005506);; Cellular Component: endoplasmic reticulum (GO:0005783);; Molecular Function: electron carrier activity (GO:0009055);; Biological Process: response to UV (GO:0009411);; Biological Process: anatomical structure morphogenesis (GO:0009653);; Biologic…	--	--	[Q]	Secondary metabolites biosynthesis, transport and catabolism	Cytochrome P450	Cytochrome P450 93G1 OS=Oryza sativa subsp. japonica OX=39947 GN=CYP93G1 PE=1 SV=1	Q	Secondary metabolites biosynthesis, transport and catabolism	PREDICTED: cytochrome P450 93A2 [Oryza sativa Japonica Group]	-	12	2	9979699878
LOC_OS07G36410	--	--	Molecular Function: DNA binding (GO:0003677);; Molecular Function: sequence-specific DNA binding transcription factor activity (GO:0003700);; Cellular Component: nucleus (GO:0005634);; Biological Process: regulation of transcription, DNA-templated (GO:0006355);; Cellular Component: cytoplasmic membrane-bounded vesicle (GO:0016023);; Molecular Function: protein dimerization activity (GO:0046983);;	--	--	--	--	Protein of unknown function, DUF538	--	S	Function unknown	PREDICTED: uncharacterized protein LOC4343534 [Oryza sativa Japonica Group]	+	7	1	21786092
LOC_OS01G59690	--	--	Cellular Component: plasmodesma (GO:0009506);; Biological Process: cytokinin-activated signaling pathway (GO:0009736);; Biological Process: heat acclimation (GO:0010286);; Biological Process: basipetal auxin transport (GO:0010540);; Biological Process: acropetal auxin transport (GO:0010541);;	--	--	--	--	--	F-box protein At4g18380 OS=Arabidopsis thaliana OX=3702 GN=At4g18380 PE=2 SV=1	S	Function unknown	PREDICTED: F-box protein At4g18380 [Oryza sativa Japonica Group]	+	69	6	3.45337e+47
LOC_OS04G52380	--	--	Molecular Function: DNA binding (GO:0003677);; Cellular Component: nucleus (GO:0005634);;	--	--	--	--	Methyl-CpG binding domain	Methyl-CpG-binding domain-containing protein 13 OS=Arabidopsis thaliana OX=3702 GN=MBD13 PE=2 SV=1	S	Function unknown	PREDICTED: methyl-CpG-binding domain-containing protein 13 isoform X1 [Oryza sativa Japonica Group]	-	24	4	3.11194e+31
LOC_OS02G34680	--	--	Molecular Function: nucleic acid binding (GO:0003676);; Cellular Component: mitochondrion (GO:0005739);; Molecular Function: sequence-specific DNA binding (GO:0043565);; Biological Process: primary metabolic process (GO:0044238);; Biological Process: cellular macromolecule metabolic process (GO:0044260);; Molecular Function: metal ion binding (GO:0046872);; Biological Process: system development …	--	--	[R]	General function prediction only	Zinc finger, C2H2 type;; C2H2-type zinc finger	Zinc finger transcription factor YY1 OS=Arabidopsis thaliana OX=3702 GN=YY1 PE=1 SV=1	S	Function unknown	PREDICTED: uncharacterized zinc finger protein At4g06634 isoform X1 [Oryza sativa Japonica Group]	+	23	3	2.08044e+23
LOC_OS11G05110	--	--	Molecular Function: magnesium ion binding (GO:0000287);; Molecular Function: pyruvate kinase activity (GO:0004743);; Cellular Component: plasma membrane (GO:0005886);; Biological Process: glucose metabolic process (GO:0006006);; Biological Process: glycolytic process (GO:0006096);; Biological Process: lipid metabolic process (GO:0006629);; Cellular Component: plastid (GO:0009536);; Biological Pro…	K00873|0|osa:4349774|Os11g0148500; K00873 pyruvate kinase [EC:2.7.1.40] (A)	ko00010:Glycolysis / Gluconeogenesis;ko00230:Purine metabolism;ko00620:Pyruvate metabolism;ko01200:Carbon metabolism;ko01230:Biosynthesis of amino acids	[G]	Carbohydrate transport and metabolism	Pyruvate kinase, barrel domain;; Pyruvate kinase, alpha/beta domain	Pyruvate kinase 1, cytosolic OS=Oryza sativa subsp. japonica OX=39947 GN=Os11g0148500 PE=1 SV=1	G	Carbohydrate transport and metabolism	PREDICTED: pyruvate kinase 1, cytosolic [Oryza sativa Japonica Group]	-	79	5	2.23934e+34
LOC_OS01G70260	--	--	Biological Process: polysaccharide catabolic process (GO:0000272);; Molecular Function: protein kinase activity (GO:0004672);; Molecular Function: protein serine/threonine kinase activity (GO:0004674);; Molecular Function: protein tyrosine kinase activity (GO:0004713);; Molecular Function: ATP binding (GO:0005524);; Cellular Component: vacuolar membrane (GO:0005774);; Cellular Component: plasma m…	--	--	[T]	Signal transduction mechanisms	Protein kinase domain;; Protein tyrosine kinase	Inactive leucine-rich repeat receptor-like protein kinase CORYNE OS=Arabidopsis thaliana OX=3702 GN=CRN PE=1 SV=1	T	Signal transduction mechanisms	PREDICTED: inactive leucine-rich repeat receptor-like protein kinase CORYNE [Oryza sativa Japonica Group]	+	4	1	40683387
LOC_OS04G01740	--	--	Molecular Function: ATP binding (GO:0005524);; Cellular Component: cell wall (GO:0005618);; Cellular Component: nucleolus (GO:0005730);; Cellular Component: mitochondrion (GO:0005739);; Cellular Component: vacuolar membrane (GO:0005774);; Cellular Component: endoplasmic reticulum (GO:0005783);; Cellular Component: Golgi apparatus (GO:0005794);; Cellular Component: cytosol (GO:0005829);; Cellular …	--	--	[O]	Posttranslational modification, protein turnover, chaperones	Hsp90 protein;; Histidine kinase-, DNA gyrase B-, and HSP90-like ATPase;; Histidine kinase-, DNA gyrase B-, and HSP90-like ATPase	Heat shock protein 82 OS=Zea mays OX=4577 GN=HSP82 PE=3 SV=1	O	Posttranslational modification, protein turnover, chaperones	PREDICTED: heat shock protein 82 [Oryza sativa Japonica Group]	+	30	2	485945485965
LOC_OS07G20580	--	--	Biological Process: RNA methylation (GO:0001510);; Molecular Function: RNA binding (GO:0003723);; Molecular Function: ATP binding (GO:0005524);; Cellular Component: nucleolus (GO:0005730);; Cellular Component: vacuole (GO:0005773);; Cellular Component: peroxisome (GO:0005777);; Cellular Component: cytosol (GO:0005829);; Cellular Component: plasma membrane (GO:0005886);; Biological Process: rRNA p…	K14811|0|osa:4342981|Os07g0301200; K14811 ATP-dependent RNA helicase DBP3 [EC:3.6.4.13] (A)	--	[A]	RNA processing and modification	DEAD/DEAH box helicase;; Helicase conserved C-terminal domain	DEAD-box ATP-dependent RNA helicase 5 OS=Oryza sativa subsp. japonica OX=39947 GN=Os07g0301200 PE=2 SV=1	L	Replication, recombination and repair	PREDICTED: DEAD-box ATP-dependent RNA helicase 5 [Oryza sativa Japonica Group]	-	5	2	1188717511887210
LOC_OS10G16640	--	--	--	--	--	--	--	--	--	S	Function unknown	expressed protein [Oryza sativa Japonica Group]	-	4	1	8295642
LOC_OS03G15940	--	--	Biological Process: polysaccharide biosynthetic process (GO:0000271);; Molecular Function: sequence-specific DNA binding transcription factor activity (GO:0003700);; Cellular Component: nucleus (GO:0005634);; Cellular Component: cytoplasm (GO:0005737);; Cellular Component: plasma membrane (GO:0005886);; Biological Process: protein targeting to vacuole (GO:0006623);; Biological Process: membrane f…	--	--	[TZ]	--	LIM domain	LIM domain-containing protein WLIM2a OS=Arabidopsis thaliana OX=3702 GN=WLIN2A PE=1 SV=1	S	Function unknown	PREDICTED: LIM domain-containing protein WLIM2a [Oryza sativa Japonica Group]	+	16	2	87997588799782
LOC_OS05G07650	--	--	Biological Process: RNA splicing, via endonucleolytic cleavage and ligation (GO:0000394);; Cellular Component: nucleus (GO:0005634);; Cellular Component: mitochondrion (GO:0005739);; Cellular Component: endosome (GO:0005768);; Cellular Component: vacuole (GO:0005773);; Cellular Component: vacuolar membrane (GO:0005774);; Cellular Component: Golgi apparatus (GO:0005794);; Cellular Component: Golgi…	--	--	[U]	Intracellular trafficking, secretion, and vesicular transport	Endomembrane protein 70	Transmembrane 9 superfamily member 12 OS=Arabidopsis thaliana OX=3702 GN=TMN12 PE=2 SV=1	S	Function unknown	PREDICTED: transmembrane 9 superfamily member 12 [Oryza sativa Japonica Group]	-	8	1	4107126
LOC_OS03G15460	--	--	Molecular Function: phospholipase A2 activity (GO:0004623);; Molecular Function: calcium ion binding (GO:0005509);; Cellular Component: extracellular region (GO:0005576);; Cellular Component: mitochondrion (GO:0005739);; Cellular Component: vacuole (GO:0005773);; Cellular Component: Golgi apparatus (GO:0005794);; Biological Process: phospholipid metabolic process (GO:0006644);; Molecular Function…	--	--	--	--	--	Probable phospholipase A2 homolog 2 OS=Oryza sativa subsp. japonica OX=39947 GN=PLA2-II PE=1 SV=1	--	--	expressed protein [Oryza sativa Japonica Group]	+	8	1	8489368
LOC_OS03G02460	--	--	Cellular Component: plasma membrane (GO:0005886);; Biological Process: polysaccharide metabolic process (GO:0005976);; Biological Process: sulfur compound metabolic process (GO:0006790);; Biological Process: phosphate-containing compound metabolic process (GO:0006796);; Biological Process: isoprenoid biosynthetic process (GO:0008299);; Biological Process: response to light stimulus (GO:0009416);;…	--	--	[Q]	Secondary metabolites biosynthesis, transport and catabolism	short chain dehydrogenase;; Enoyl-(Acyl carrier protein) reductase;; KR domain	Short-chain dehydrogenase TIC 32, chloroplastic OS=Arabidopsis thaliana OX=3702 GN=TIC32 PE=2 SV=1	S	Function unknown	PREDICTED: short-chain dehydrogenase TIC 32, chloroplastic [Oryza sativa Japonica Group]	-	7	1	884723
LOC_OS05G12490	--	--	Cellular Component: Golgi membrane (GO:0000139);; Molecular Function: nucleotide-sugar transmembrane transporter activity (GO:0005338);; Molecular Function: GDP-fucose transmembrane transporter activity (GO:0005457);; Molecular Function: UDP-galactose transmembrane transporter activity (GO:0005459);; Molecular Function: UDP-glucose transmembrane transporter activity (GO:0005460);; Cellular Compon…	--	--	[GE]	--	Triose-phosphate Transporter family	UDP-rhamnose/UDP-galactose transporter 5 OS=Arabidopsis thaliana OX=3702 GN=URGT5 PE=1 SV=1	S	Function unknown	PREDICTED: UDP-galactose transporter 2 [Oryza sativa Japonica Group]	-	5	1	7171375
LOC_OS03G51459	--	--	Cellular Component: mitochondrion (GO:0005739);; Biological Process: response to oxidative stress (GO:0006979);;	--	--	--	--	--	--	S	Function unknown	Os03g0724500, partial [Oryza sativa Japonica Group]	-	8	2	2944819329448220
LOC_OS03G64200	--	--	Molecular Function: transporter activity (GO:0005215);; Molecular Function: ATP binding (GO:0005524);; Cellular Component: plasma membrane (GO:0005886);; Biological Process: ATP catabolic process (GO:0006200);; Biological Process: lipid transport (GO:0006869);; Cellular Component: plasmodesma (GO:0009506);; Biological Process: response to wounding (GO:0009611);; Biological Process: response to sa…	--	--	[Q]	Secondary metabolites biosynthesis, transport and catabolism	ABC-2 type transporter;; ABC transporter	ABC transporter G family member 3 OS=Arabidopsis thaliana OX=3702 GN=ABCG3 PE=1 SV=2	V	Defense mechanisms	PREDICTED: ABC transporter G family member 3 isoform X2 [Oryza sativa Japonica Group]	-	8	1	36273422
LOC_OS04G55050	--	--	Cellular Component: plant-type vacuole (GO:0000325);; Molecular Function: protein binding (GO:0005515);; Molecular Function: ATP binding (GO:0005524);; Cellular Component: mitochondrion (GO:0005739);; Cellular Component: vacuolar membrane (GO:0005774);; Cellular Component: Golgi apparatus (GO:0005794);; Cellular Component: plasma membrane (GO:0005886);; Biological Process: glucose catabolic proce…	--	--	[J]	Translation, ribosomal structure and biogenesis	Amidase	Glutamyl-tRNA(Gln) amidotransferase subunit A, chloroplastic/mitochondrial OS=Oryza sativa subsp. japonica OX=39947 GN=GATA PE=3 SV=3	J	Translation, ribosomal structure and biogenesis	OSJNBa0033G05.4 [Oryza sativa Japonica Group]	-	5	1	32735985
LOC_OS01G46710	--	--	Biological Process: microtubule cytoskeleton organization (GO:0000226);; Biological Process: cytokinesis by cell plate formation (GO:0000911);; Molecular Function: translation initiation factor activity (GO:0003743);; Molecular Function: protein binding (GO:0005515);; Cellular Component: cytosol (GO:0005829);; Biological Process: regulation of transcription, DNA-templated (GO:0006355);; Biologica…	--	--	--	--	Hairy Orange	--	S	Function unknown	PREDICTED: uncharacterized protein LOC4324178 isoform X1 [Oryza sativa Japonica Group]	-	5	1	26602209
LOC_OS02G36974	--	--	Biological Process: DNA damage checkpoint (GO:0000077);; Molecular Function: phospholipase A2 activity (GO:0004623);; Molecular Function: ATP binding (GO:0005524);; Cellular Component: cell wall (GO:0005618);; Cellular Component: nuclear envelope (GO:0005635);; Cellular Component: mitochondrion (GO:0005739);; Cellular Component: Golgi apparatus (GO:0005794);; Cellular Component: cytosol (GO:00058…	K06630|0|osa:4329775|Os02g0580300; K06630 14-3-3 protein epsilon (A)	--	[O]	Posttranslational modification, protein turnover, chaperones	14-3-3 protein	14-3-3-like protein GF14-E OS=Oryza sativa subsp. japonica OX=39947 GN=GF14E PE=2 SV=1	T	Signal transduction mechanisms	PREDICTED: 14-3-3-like protein GF14-E isoform X1 [Oryza sativa Japonica Group]	+	37	5	2.23374e+39
LOC_OS03G48600	--	--	--	--	--	--	--	Domain of unknown function (DUF966)	Protein UPSTREAM OF FLC OS=Arabidopsis thaliana OX=3702 GN=UFC PE=2 SV=1	S	Function unknown	auxin-regulated protein, putative, expressed [Oryza sativa Japonica Group]	-	13	2	2770534527705390
LOC_OS01G67770	--	--	Molecular Function: phosphorelay response regulator activity (GO:0000156);; Biological Process: phosphorelay signal transduction system (GO:0000160);; Molecular Function: DNA binding (GO:0003677);; Molecular Function: chromatin binding (GO:0003682);; Molecular Function: sequence-specific DNA binding transcription factor activity (GO:0003700);; Molecular Function: protein binding (GO:0005515);; Ce…	K14491|0|osa:4325022|Os01g0904700; K14491 two-component response regulator ARR-B family (A)	ko04075:Plant hormone signal transduction	[K]	Transcription	Response regulator receiver domain;; Myb-like DNA-binding domain	Two-component response regulator ORR26 OS=Oryza sativa subsp. japonica OX=39947 GN=RR26 PE=3 SV=2	T	Signal transduction mechanisms	PREDICTED: two-component response regulator ORR26 [Oryza sativa Japonica Group]	-	5	1	39387279
LOC_OS01G49940	--	--	--	--	--	[A]	RNA processing and modification	Symplekin tight junction protein C terminal;; Domain of unknown function (DUF3453)	--	S	Function unknown	PREDICTED: uncharacterized protein LOC4323885 isoform X2 [Oryza sativa Japonica Group]	-	6	1	28683934
LOC_OS04G58730	--	--	Molecular Function: DNA binding (GO:0003677);;	--	--	--	--	Domain of unknown function (DUF296)	AT-hook motif nuclear-localized protein 11 OS=Arabidopsis thaliana OX=3702 GN=AHL11 PE=2 SV=1	S	Function unknown	PREDICTED: AT-hook motif nuclear-localized protein 9 [Oryza sativa Japonica Group]	-	28	4	3.49223e+31
LOC_OS07G44630	--	--	Molecular Function: thymidylate kinase activity (GO:0004798);; Molecular Function: ATP binding (GO:0005524);; Cellular Component: nucleoplasm (GO:0005654);; Cellular Component: mitochondrion (GO:0005739);; Cellular Component: cytosol (GO:0005829);; Biological Process: dTDP biosynthetic process (GO:0006233);; Biological Process: phosphorylation (GO:0016310);;	K00943|7.80825e-169|osa:4344056|Os07g0639900; K00943 dTMP kinase [EC:2.7.4.9] (A)	ko00240:Pyrimidine metabolism	[F]	Nucleotide transport and metabolism	Thymidylate kinase	Thymidylate kinase OS=Arabidopsis thaliana OX=3702 GN=ZEU1 PE=2 SV=1	F	Nucleotide transport and metabolism	PREDICTED: thymidylate kinase [Oryza sativa Japonica Group]	-	2	1	26631308
LOC_OS03G64320	--	--	--	--	--	--	--	--	COP1-interacting protein 7 OS=Arabidopsis thaliana OX=3702 GN=CIP7 PE=1 SV=1	S	Function unknown	PREDICTED: uncharacterized protein LOC4334871 [Oryza sativa Japonica Group]	+	17	3	3.63585e+23
LOC_OS02G34510	--	--	Cellular Component: vacuolar proton-transporting V-type ATPase, V0 domain (GO:0000220);; Cellular Component: vacuolar membrane (GO:0005774);; Cellular Component: plasma membrane (GO:0005886);; Biological Process: response to osmotic stress (GO:0006970);; Biological Process: organelle organization (GO:0006996);; Molecular Function: hydrogen-exporting ATPase activity, phosphorylative mechanism (GO:…	K02155|4.16755e-77|osa:4329623|Os02g0550100; K02155 V-type H+-transporting ATPase 16kDa proteolipid subunit (A)	ko00190:Oxidative phosphorylation;ko04145:Phagosome	[C]	Energy production and conversion	ATP synthase subunit C	V-type proton ATPase 16 kDa proteolipid subunit OS=Avena sativa OX=4498 GN=VATP-P1 PE=2 SV=1	C	Energy production and conversion	PREDICTED: V-type proton ATPase 16 kDa proteolipid subunit [Oryza sativa Japonica Group]	-	5	1	20685665
LOC_OS02G15550	--	--	Molecular Function: spermidine synthase activity (GO:0004766);; Molecular Function: protein binding (GO:0005515);; Cellular Component: nucleus (GO:0005634);; Cellular Component: cytoplasm (GO:0005737);; Biological Process: polyamine biosynthetic process (GO:0006596);; Molecular Function: methyltransferase activity (GO:0008168);; Biological Process: spermidine biosynthetic process (GO:0008295);; B…	--	--	[E]	Amino acid transport and metabolism	Spermine/spermidine synthase domain;; Spermidine synthase tetramerisation domain;; Methyltransferase domain	Spermine synthase OS=Arabidopsis thaliana OX=3702 GN=SPMS PE=1 SV=1	E	Amino acid transport and metabolism	PREDICTED: spermine synthase [Oryza sativa Japonica Group]	-	19	3	8.72668e+20
LOC_OS03G03880	--	--	Molecular Function: protein serine/threonine kinase activity (GO:0004674);; Molecular Function: protein binding (GO:0005515);; Molecular Function: ATP binding (GO:0005524);; Cellular Component: nucleolus (GO:0005730);; Cellular Component: plasma membrane (GO:0005886);; Biological Process: protein phosphorylation (GO:0006468);; Biological Process: nitrogen compound metabolic process (GO:0006807);;…	--	--	[T]	Signal transduction mechanisms	Protein kinase domain;; Protein tyrosine kinase	Probable serine/threonine-protein kinase PBL21 OS=Arabidopsis thaliana OX=3702 GN=PBL21 PE=1 SV=1	T	Signal transduction mechanisms	PREDICTED: serine/threonine-protein kinase CDL1 [Oryza sativa Japonica Group]	+	12	4	1.7702e+27
LOC_OS03G22340	--	--	Biological Process: RNA methylation (GO:0001510);; Molecular Function: structural constituent of ribosome (GO:0003735);; Molecular Function: calmodulin binding (GO:0005516);; Cellular Component: nucleolus (GO:0005730);; Cellular Component: vacuole (GO:0005773);; Cellular Component: plasma membrane (GO:0005886);; Biological Process: translation (GO:0006412);; Biological Process: signal transductio…	K02891|1.95341e-63|osa:4332802|Os03g0343500; K02891 large subunit ribosomal protein L22e (A)	ko03010:Ribosome	[J]	Translation, ribosomal structure and biogenesis	Ribosomal L22e protein family	60S ribosomal protein L22-2 OS=Arabidopsis thaliana OX=3702 GN=RPL22B PE=2 SV=1	J	Translation, ribosomal structure and biogenesis	PREDICTED: 60S ribosomal protein L22-2 [Oryza sativa Japonica Group]	-	26	2	1279833412798300
LOC_OS01G65920	--	--	Molecular Function: ubiquitin-protein transferase activity (GO:0004842);; Molecular Function: protein binding (GO:0005515);; Cellular Component: nucleus (GO:0005634);; Biological Process: signal transduction (GO:0007165);; Biological Process: response to ethylene (GO:0009723);; Biological Process: heat acclimation (GO:0010286);; Biological Process: lateral root formation (GO:0010311);; Biological…	K03875|0|osa:4324993|Os01g0881900; K03875 F-box and leucine-rich repeat protein 1 (S-phase kinase-associated protein 2) (A)	ko04120:Ubiquitin mediated proteolysis	[R]	General function prediction only	Leucine Rich repeat;; Leucine Rich repeats (2 copies);; Leucine Rich Repeat	F-box protein SKP2A OS=Arabidopsis thaliana OX=3702 GN=SKP2A PE=1 SV=1	O	Posttranslational modification, protein turnover, chaperones	PREDICTED: F-box protein SKP2A [Oryza sativa Japonica Group]	-	24	2	3827511338275050
LOC_OS03G03130	--	--	Molecular Function: ubiquitin-protein transferase activity (GO:0004842);; Molecular Function: protein binding (GO:0005515);; Cellular Component: nucleus (GO:0005634);; Cellular Component: vacuole (GO:0005773);; Biological Process: DNA metabolic process (GO:0006259);; Biological Process: ubiquitin-dependent protein catabolic process (GO:0006511);; Biological Process: protein targeting (GO:0006605)…	K10577|6.2489e-117|osa:4331446|Os03g0123100; K10577 ubiquitin-conjugating enzyme E2 I [EC:6.3.2.19] (A)	ko03013:RNA transport;ko04120:Ubiquitin mediated proteolysis	[O]	Posttranslational modification, protein turnover, chaperones	Ubiquitin-conjugating enzyme	SUMO-conjugating enzyme SCE1 OS=Arabidopsis thaliana OX=3702 GN=SCE1 PE=1 SV=1	O	Posttranslational modification, protein turnover, chaperones	PREDICTED: SUMO-conjugating enzyme SCE1 [Oryza sativa Japonica Group]	+	17	3	1.32151e+20
LOC_OS02G34500	--	--	Cellular Component: membrane (GO:0016020);; Cellular Component: cell part (GO:0044464);;	--	--	--	--	--	--	S	Function unknown	PREDICTED: uncharacterized protein At4g26450 isoform X1 [Oryza sativa Japonica Group]	+	4	1	20682186
LOC_OS09G38768	--	--	Molecular Function: protein binding (GO:0005515);; Cellular Component: Golgi apparatus (GO:0005794);; Cellular Component: plasma membrane (GO:0005886);; Biological Process: amino acid transport (GO:0006865);; Biological Process: membrane fusion (GO:0006944);; Cellular Component: chloroplast thylakoid lumen (GO:0009543);; Biological Process: systemic acquired resistance (GO:0009627);; Biological P…	--	--	[DKT]	--	LEM3 (ligand-effect modulator 3) family / CDC50 family	ALA-interacting subunit 5 OS=Arabidopsis thaliana OX=3702 GN=ALIS5 PE=1 SV=1	DKT	--	PREDICTED: ALA-interacting subunit 5 [Oryza sativa Japonica Group]	+	8	2	2227782422277860
LOC_OS06G51270	--	--	Cellular Component: 1,3-beta-D-glucan synthase complex (GO:0000148);; Molecular Function: 1,3-beta-D-glucan synthase activity (GO:0003843);; Cellular Component: Golgi apparatus (GO:0005794);; Biological Process: (1->3)-beta-D-glucan biosynthetic process (GO:0006075);; Biological Process: protein targeting to membrane (GO:0006612);; Biological Process: nucleotide transport (GO:0006862);; Biologica…	K11000|0|osa:4342136|Os06g0728800; K11000 callose synthase [EC:2.4.1.-] (A)	--	[M]	Cell wall/membrane/envelope biogenesis	1,3-beta-glucan synthase component;; 1,3-beta-glucan synthase subunit FKS1, domain-1;; Vta1 like	Callose synthase 3 OS=Arabidopsis thaliana OX=3702 GN=CALS3 PE=3 SV=3	S	Function unknown	PREDICTED: callose synthase 3 [Oryza sativa Japonica Group]	-	14	3	3.10335e+23
LOC_OS02G21250	--	--	Cellular Component: plasma membrane (GO:0005886);; Biological Process: protein folding (GO:0006457);; Biological Process: intracellular protein transport (GO:0006886);; Biological Process: response to heat (GO:0009408);; Biological Process: response to high light intensity (GO:0009644);; Biological Process: protein transport (GO:0015031);; Biological Process: vesicle-mediated transport (GO:001619…	--	--	[U]	Intracellular trafficking, secretion, and vesicular transport	Clathrin adaptor complex small chain	Coatomer subunit zeta-2 OS=Oryza sativa subsp. japonica OX=39947 GN=COPZ2 PE=2 SV=1	U	Intracellular trafficking, secretion, and vesicular transport	PREDICTED: coatomer subunit zeta-2 [Oryza sativa Japonica Group]	+	12	3	1.26132e+23
LOC_OS07G16040	--	--	Molecular Function: nucleotide binding (GO:0000166);; Cellular Component: mitochondrion (GO:0005739);; Biological Process: response to stress (GO:0006950);; Biological Process: multicellular organismal development (GO:0007275);; Biological Process: response to light stimulus (GO:0009416);; Cellular Component: plastid (GO:0009536);; Biological Process: photosynthesis (GO:0015979);; Molecular Funct…	--	--	[C]	Energy production and conversion	D-isomer specific 2-hydroxyacid dehydrogenase, NAD binding domain;; D-isomer specific 2-hydroxyacid dehydrogenase, catalytic domain	D-3-phosphoglycerate dehydrogenase 2, chloroplastic OS=Arabidopsis thaliana OX=3702 GN=PGDH2 PE=1 SV=2	E	Amino acid transport and metabolism	PREDICTED: hydroxypyruvate reductase [Oryza sativa Japonica Group]	+	6	1	9357729
LOC_OS04G33440	--	--	Molecular Function: DNA binding (GO:0003677);; Cellular Component: nucleus (GO:0005634);; Biological Process: regulation of transcription, DNA-templated (GO:0006355);;	--	--	--	--	DNA binding protein S1FA	DNA-binding protein S1FA2 OS=Oryza sativa subsp. japonica OX=39947 GN=S1FA2 PE=3 SV=2	S	Function unknown	PREDICTED: DNA-binding protein S1FA2 [Oryza sativa Japonica Group]	-	4	1	20224719
LOC_OS07G47960	--	--	Molecular Function: DNA binding (GO:0003677);; Cellular Component: nucleus (GO:0005634);; Molecular Function: protein dimerization activity (GO:0046983);;	--	--	--	--	--	--	S	Function unknown	PREDICTED: uncharacterized protein LOC9270706 [Oryza sativa Japonica Group]	+	2	1	28651421
LOC_OS04G51460	--	--	Molecular Function: hydrolase activity, hydrolyzing O-glycosyl compounds (GO:0004553);; Cellular Component: extracellular region (GO:0005576);; Cellular Component: cell wall (GO:0005618);; Cellular Component: Golgi apparatus (GO:0005794);; Biological Process: cellular glucan metabolic process (GO:0006073);; Biological Process: response to heat (GO:0009408);; Biological Process: response to cold (…	--	--	--	--	Glycosyl hydrolases family 16;; Xyloglucan endo-transglycosylase (XET) C-terminus	Xyloglucan endotransglucosylase/hydrolase protein 24 OS=Arabidopsis thaliana OX=3702 GN=XTH24 PE=1 SV=2	G	Carbohydrate transport and metabolism	PREDICTED: xyloglucan endotransglucosylase/hydrolase protein 24 [Oryza sativa Japonica Group]	-	19	2	3048215230482120
LOC_OS03G44420	--	--	Biological Process: maltose metabolic process (GO:0000023);; Biological Process: polysaccharide catabolic process (GO:0000272);; Molecular Function: GTPase activity (GO:0003924);; Molecular Function: structural molecule activity (GO:0005198);; Molecular Function: GTP binding (GO:0005525);; Biological Process: pentose-phosphate shunt (GO:0006098);; Biological Process: GTP catabolic process (GO:000…	K03531|0|osa:4333567|Os03g0646100; K03531 cell division protein FtsZ (A)	--	--	--	Tubulin/FtsZ family, GTPase domain;; FtsZ family, C-terminal domain	Cell division protein FtsZ homolog 2-1, chloroplastic OS=Arabidopsis thaliana OX=3702 GN=FTSZ2-1 PE=1 SV=2	D	Cell cycle control, cell division, chromosome partitioning	PREDICTED: cell division protein FtsZ homolog 2-1, chloroplastic [Oryza sativa Japonica Group]	+	25	3	2.50008e+23
LOC_OS07G06610	--	--	Molecular Function: ubiquitin thiolesterase activity (GO:0004221);; Molecular Function: structural constituent of cell wall (GO:0005199);; Biological Process: cellular protein modification process (GO:0006464);; Biological Process: ubiquitin-dependent protein catabolic process (GO:0006511);; Molecular Function: cysteine-type peptidase activity (GO:0008234);; Cellular Component: plastid (GO:000953…	K11835|0|osa:4342448|Os07g0160000; K11835 ubiquitin carboxyl-terminal hydrolase 4/11/15 [EC:3.4.19.12] (A)	--	[O]	Posttranslational modification, protein turnover, chaperones	Ubiquitin carboxyl-terminal hydrolase;; Ubiquitin carboxyl-terminal hydrolase	Ubiquitin carboxyl-terminal hydrolase 8 OS=Arabidopsis thaliana OX=3702 GN=UBP8 PE=2 SV=2	O	Posttranslational modification, protein turnover, chaperones	PREDICTED: ubiquitin carboxyl-terminal hydrolase 8 isoform X1 [Oryza sativa Japonica Group]	+	2	1	3214054
LOC_OS07G42260	--	--	Molecular Function: endopeptidase activity (GO:0004175);; Molecular Function: threonine-type endopeptidase activity (GO:0004298);; Molecular Function: copper ion transmembrane transporter activity (GO:0005375);; Molecular Function: binding (GO:0005488);; Cellular Component: nucleus (GO:0005634);; Cellular Component: vacuole (GO:0005773);; Cellular Component: proteasome core complex (GO:0005839);;…	K02730|2.29167e-167|osa:4343891|Os07g0614100; K02730 20S proteasome subunit alpha 1 [EC:3.4.25.1] (A)	ko03050:Proteasome	[O]	Posttranslational modification, protein turnover, chaperones	Proteasome subunit;; Proteasome subunit A N-terminal signature	Proteasome subunit alpha type-6 OS=Nicotiana tabacum OX=4097 GN=PAA1 PE=2 SV=1	O	Posttranslational modification, protein turnover, chaperones	PREDICTED: proteasome subunit alpha type-6 [Oryza sativa Japonica Group]	-	2	1	25289856
LOC_OS05G07070	--	--	Molecular Function: ubiquitin-protein transferase activity (GO:0004842);; Molecular Function: protein binding (GO:0005515);; Cellular Component: vacuolar membrane (GO:0005774);; Biological Process: intracellular protein transport (GO:0006886);; Molecular Function: zinc ion binding (GO:0008270);; Biological Process: response to salt stress (GO:0009651);; Biological Process: abscisic acid metabolic…	--	--	[O]	Posttranslational modification, protein turnover, chaperones	Ring finger domain;; Zinc finger, C3HC4 type (RING finger);; RING-H2 zinc finger domain;; Zinc finger, C3HC4 type (RING finger);; RING-like zinc finger	E3 ubiquitin-protein ligase MBR2 OS=Arabidopsis thaliana OX=3702 GN=MBR2 PE=1 SV=1	O	Posttranslational modification, protein turnover, chaperones	PREDICTED: E3 ubiquitin-protein ligase MBR1 isoform X1 [Oryza sativa Japonica Group]	-	7	1	3718334
LOC_OS04G39240	--	--	--	--	--	--	--	--	--	S	Function unknown	PREDICTED: uncharacterized protein LOC4336100 isoform X1 [Oryza sativa Japonica Group]	-	4	1	23331225
LOC_OS07G45350	--	--	Molecular Function: ubiquitin-protein transferase activity (GO:0004842);; Cellular Component: nucleus (GO:0005634);; Cellular Component: cytoplasm (GO:0005737);; Biological Process: mitochondrion organization (GO:0007005);; Biological Process: signal transduction (GO:0007165);; Molecular Function: zinc ion binding (GO:0008270);; Biological Process: response to bacterium (GO:0009617);; Biological …	K15688|0|osa:4344112|Os07g0647800; K15688 E3 ubiquitin-protein ligase MUL1 [EC:6.3.2.19] (A)	--	[O]	Posttranslational modification, protein turnover, chaperones	E3 Ubiquitin ligase;; Zinc finger, C3HC4 type (RING finger);; Prokaryotic RING finger family 4	E3 ubiquitin-protein ligase SP1 OS=Arabidopsis thaliana OX=3702 GN=SP1 PE=1 SV=1	O	Posttranslational modification, protein turnover, chaperones	PREDICTED: mitochondrial ubiquitin ligase activator of NFKB 1 [Oryza sativa Japonica Group]	-	7	1	27050733
LOC_OS06G45120	--	--	Cellular Component: plant-type vacuole (GO:0000325);; Biological Process: cell morphogenesis (GO:0000902);; Molecular Function: protease binding (GO:0002020);; Molecular Function: ATP binding (GO:0005524);; Cellular Component: cell wall (GO:0005618);; Cellular Component: mitochondrion (GO:0005739);; Cellular Component: vacuolar membrane (GO:0005774);; Cellular Component: Golgi apparatus (GO:00057…	K02145|0|osa:4341751|Os06g0662000; K02145 V-type H+-transporting ATPase subunit A [EC:3.6.3.14] (A)	ko00190:Oxidative phosphorylation;ko04145:Phagosome	[C]	Energy production and conversion	ATP synthase alpha/beta family, nucleotide-binding domain;; ATPsynthase alpha/beta subunit N-term extension;; ATP synthase alpha/beta family, beta-barrel domain	V-type proton ATPase catalytic subunit A OS=Daucus carota OX=4039 PE=2 SV=1	C	Energy production and conversion	PREDICTED: V-type proton ATPase catalytic subunit A [Oryza sativa Japonica Group]	-	10	1	27286333
LOC_OS08G44770	--	--	Molecular Function: peroxidase activity (GO:0004601);; Molecular Function: superoxide dismutase activity (GO:0004784);; Molecular Function: copper ion binding (GO:0005507);; Biological Process: glucose metabolic process (GO:0006006);; Molecular Function: zinc ion binding (GO:0008270);; Biological Process: toxin catabolic process (GO:0009407);; Biological Process: response to light stimulus (GO:00…	K04565|2.31844e-108|osa:4346329|Os08g0561700; K04565 superoxide dismutase, Cu-Zn family [EC:1.15.1.1] (A)	ko04146:Peroxisome	[P]	Inorganic ion transport and metabolism	Copper/zinc superoxide dismutase (SODC)	Superoxide dismutase [Cu-Zn], chloroplastic OS=Oryza sativa subsp. japonica OX=39947 GN=SODCP PE=1 SV=1	P	Inorganic ion transport and metabolism	putative superoxide dismutase [Cu-Zn], chloroplast precursor [Oryza sativa Japonica Group]	+	8	2	2813544928135480
LOC_OS03G57460	--	--	Molecular Function: binding (GO:0005488);; Cellular Component: extracellular region (GO:0005576);; Cellular Component: vacuole (GO:0005773);; Biological Process: cell adhesion (GO:0007155);; Cellular Component: cytoplasmic membrane-bounded vesicle (GO:0016023);; Cellular Component: cell periphery (GO:0071944);;	--	--	[MW]	--	Fasciclin domain	Fasciclin-like arabinogalactan protein 16 OS=Arabidopsis thaliana OX=3702 GN=FLA16 PE=2 SV=1	M	Cell wall/membrane/envelope biogenesis	PREDICTED: fasciclin-like arabinogalactan protein 16 [Oryza sativa Japonica Group]	-	33	5	3.2757e+39
LOC_OS06G14740	--	--	Molecular Function: nucleotide binding (GO:0000166);; Molecular Function: fructose-bisphosphate aldolase activity (GO:0004332);; Molecular Function: phosphogluconate dehydrogenase (decarboxylating) activity (GO:0004616);; Cellular Component: nucleus (GO:0005634);; Biological Process: glycolytic process (GO:0006096);; Biological Process: pentose-phosphate shunt (GO:0006098);; Biological Process: v…	--	--	[R]	General function prediction only	Fructose-bisphosphate aldolase class-II;; Putative sugar-binding N-terminal domain;; NAD-binding of NADP-dependent 3-hydroxyisobutyrate dehydrogenase;; NAD binding domain of 6-phosphogluconate dehydrogenase;; Putative nucleotide-binding of sugar-metabolising enzyme;; NADP oxidoreductase coenzyme F420-dependent	Probable 3-hydroxyisobutyrate dehydrogenase, mitochondrial OS=Arabidopsis thaliana OX=3702 GN=At4g20930 PE=2 SV=3	S	Function unknown	PREDICTED: uncharacterized protein LOC4340684 isoform X2 [Oryza sativa Japonica Group]	+	8	3	8.31684e+20
LOC_OS02G54700	--	--	Molecular Function: nucleotide binding (GO:0000166);; Biological Process: mRNA splicing, via spliceosome (GO:0000398);; Molecular Function: RNA binding transcription antitermination factor activity (GO:0001072);; Biological Process: formation of translation preinitiation complex (GO:0001731);; Molecular Function: double-stranded DNA binding (GO:0003690);; Molecular Function: single-stranded DNA b…	K03248|0|osa:4330963|Os02g0788400; K03248 translation initiation factor 3 subunit G (A)	ko03013:RNA transport	[J]	Translation, ribosomal structure and biogenesis	Eukaryotic translation initiation factor 3 subunit G;; RNA recognition motif. (a.k.a. RRM, RBD, or RNP domain)	Oligouridylate-binding protein 1C OS=Arabidopsis thaliana OX=3702 GN=UBP1C PE=1 SV=1	J	Translation, ribosomal structure and biogenesis	PREDICTED: eukaryotic translation initiation factor 3 subunit G [Oryza sativa Japonica Group]	+	22	4	3.34957e+31
LOC_OS11G10510	--	--	Molecular Function: nucleotide binding (GO:0000166);; Biological Process: response to hypoxia (GO:0001666);; Molecular Function: alcohol dehydrogenase (NAD) activity (GO:0004022);; Cellular Component: cytosol (GO:0005829);; Cellular Component: plasma membrane (GO:0005886);; Molecular Function: zinc ion binding (GO:0008270);; Biological Process: response to salt stress (GO:0009651);; Biological Pr…	K18857|0|osa:4350054|Os11g0210500; K18857 alcohol dehydrogenase class-P [EC:1.1.1.1] (A)	ko00010:Glycolysis / Gluconeogenesis;ko00071:Fatty acid degradation;ko00350:Tyrosine metabolism;ko00592:alpha-Linolenic acid metabolism	[Q]	Secondary metabolites biosynthesis, transport and catabolism	Zinc-binding dehydrogenase;; Alcohol dehydrogenase GroES-like domain	Alcohol dehydrogenase 2 OS=Oryza sativa subsp. japonica OX=39947 GN=ADH2 PE=2 SV=2	C	Energy production and conversion	PREDICTED: alcohol dehydrogenase 2 [Oryza sativa Japonica Group]	-	11	2	57450655745296
LOC_OS03G14915	--	--	Biological Process: amino acid transmembrane transport (GO:0003333);; Cellular Component: mitochondrion (GO:0005739);; Cellular Component: membrane (GO:0016020);;	--	--	--	--	Tryptophan/tyrosine permease family	--	E	Amino acid transport and metabolism	PREDICTED: tyrosine-specific transport protein 2 isoform X2 [Oryza sativa Japonica Group]	+	2	1	8134225
LOC_OS02G27950	--	--	Molecular Function: protein binding (GO:0005515);;	--	--	[A]	RNA processing and modification	LsmAD domain;; Ataxin 2 SM domain;; Ataxin-2 C-terminal region	Polyadenylate-binding protein-interacting protein 4 OS=Arabidopsis thaliana OX=3702 GN=CID4 PE=2 SV=1	S	Function unknown	PREDICTED: polyadenylate-binding protein-interacting protein 4 isoform X1 [Oryza sativa Japonica Group]	-	7	2	1653733016537350
LOC_OS01G68750	--	--	Cellular Component: nucleus (GO:0005634);; Cellular Component: Golgi apparatus (GO:0005794);; Cellular Component: cytosol (GO:0005829);; Cellular Component: plasma membrane (GO:0005886);; Biological Process: glucose catabolic process (GO:0006007);; Biological Process: protein N-linked glycosylation (GO:0006487);; Biological Process: transport (GO:0006810);; Biological Process: intracellular prote…	K12400|0|osa:4324331|Os01g0916200; K12400 AP-4 complex subunit epsilon-1 (A)	--	[U]	Intracellular trafficking, secretion, and vesicular transport	Adaptin N terminal region;; HEAT repeats;; non-SMC mitotic condensation complex subunit 1;; HEAT-like repeat	AP-4 complex subunit epsilon OS=Arabidopsis thaliana OX=3702 GN=At1g31730 PE=1 SV=1	U	Intracellular trafficking, secretion, and vesicular transport	PREDICTED: AP-4 complex subunit epsilon [Oryza sativa Japonica Group]	-	14	2	3993127539931450
LOC_OS05G01230	--	--	Biological Process: mitotic cell cycle (GO:0000278);; Biological Process: nuclear division (GO:0000280);; Biological Process: double-strand break repair via homologous recombination (GO:0000724);; Biological Process: cytokinesis by cell plate formation (GO:0000911);; Molecular Function: chromatin binding (GO:0003682);; Molecular Function: ubiquitin-protein transferase activity (GO:0004842);; Cell…	K10638|0|osa:4337533|Os05g0102600; K10638 E3 ubiquitin-protein ligase UHRF1 [EC:6.3.2.19] (A)	--	--	--	SAD/SRA domain;; RING-type zinc-finger;; Zinc finger, C3HC4 type (RING finger);; Zinc finger, C3HC4 type (RING finger);; Zinc finger, C3HC4 type (RING finger);; Ring finger domain	E3 ubiquitin-protein ligase ORTHRUS 2 OS=Arabidopsis thaliana OX=3702 GN=ORTH2 PE=1 SV=1	V	Defense mechanisms	PREDICTED: E3 ubiquitin-protein ligase ORTHRUS 2 [Oryza sativa Japonica Group]	+	8	2	159463160194
LOC_OS01G18744	--	--	Molecular Function: O-acyltransferase activity (GO:0008374);; Biological Process: phenylpropanoid biosynthetic process (GO:0009699);; Molecular Function: transferase activity, transferring acyl groups other than amino-acyl groups (GO:0016747);; Biological Process: primary metabolic process (GO:0044238);; Biological Process: single-organism cellular process (GO:0044763);; Molecular Function: hydro…	--	--	--	--	Transferase family	Acyl transferase 4 OS=Oryza sativa subsp. japonica OX=39947 GN=AT4 PE=1 SV=1	S	Function unknown	PREDICTED: 3&apos;-N-debenzoyl-2&apos;-deoxytaxol N-benzoyltransferase [Oryza sativa Japonica Group]	-	4	1	10561360
LOC_OS02G57010	--	--	Molecular Function: nucleotide binding (GO:0000166);; Molecular Function: single-stranded DNA binding (GO:0003697);; Molecular Function: RNA binding (GO:0003723);; Biological Process: transcription, DNA-templated (GO:0006351);; Biological Process: RNA processing (GO:0006396);; Molecular Function: poly(U) RNA binding (GO:0008266);; Biological Process: nucleotide metabolic process (GO:0009117);; Ce…	--	--	[R]	General function prediction only	RNA recognition motif. (a.k.a. RRM, RBD, or RNP domain)	29 kDa ribonucleoprotein B, chloroplastic OS=Nicotiana sylvestris OX=4096 PE=2 SV=1	S	Function unknown	PREDICTED: 28 kDa ribonucleoprotein, chloroplastic [Oryza sativa Japonica Group]	+	5	1	34924753
LOC_OS01G13770	--	--	Molecular Function: inorganic phosphate transmembrane transporter activity (GO:0005315);; Cellular Component: mitochondrion (GO:0005739);; Biological Process: glucose catabolic process (GO:0006007);; Biological Process: purine nucleobase transport (GO:0006863);; Biological Process: vacuole organization (GO:0007033);; Cellular Component: chloroplast thylakoid (GO:0009534);; Biological Process: emb…	K15283|0|osa:4326365|Os01g0239200; K15283 solute carrier family 35, member E1 (A)	--	[GE]	--	Triose-phosphate Transporter family;; EamA-like transporter family	Triose phosphate/phosphate translocator TPT, chloroplastic OS=Oryza sativa subsp. japonica OX=39947 GN=TPT PE=2 SV=1	S	Function unknown	PREDICTED: triose phosphate/phosphate translocator TPT, chloroplastic [Oryza sativa Japonica Group]	-	16	4	7.7183e+27
LOC_OS01G09670	--	--	--	--	--	[S]	Function unknown	Ndr family	Protein NDL2 OS=Arabidopsis thaliana OX=3702 GN=NDL2 PE=1 SV=1	S	Function unknown	PREDICTED: pollen-specific protein SF21 [Oryza sativa Japonica Group]	-	4	1	4982181
LOC_OS07G46660	--	--	Molecular Function: ubiquitin thiolesterase activity (GO:0004221);; Molecular Function: ubiquitin-specific protease activity (GO:0004843);; Cellular Component: nucleus (GO:0005634);; Biological Process: cellular protein modification process (GO:0006464);; Biological Process: ubiquitin-dependent protein catabolic process (GO:0006511);; Molecular Function: cysteine-type peptidase activity (GO:00082…	K11841|0|osa:4344181|Os07g0661300; K11841 ubiquitin carboxyl-terminal hydrolase 10 [EC:3.4.19.12] (A)	--	[O]	Posttranslational modification, protein turnover, chaperones	Ubiquitin carboxyl-terminal hydrolase;; Ubiquitin carboxyl-terminal hydrolase	Ubiquitin carboxyl-terminal hydrolase 24 OS=Arabidopsis thaliana OX=3702 GN=UBP24 PE=1 SV=1	O	Posttranslational modification, protein turnover, chaperones	PREDICTED: ubiquitin carboxyl-terminal hydrolase 24 isoform X1 [Oryza sativa Japonica Group]	+	6	1	27888146
LOC_OS02G46030	--	--	Molecular Function: DNA binding (GO:0003677);; Molecular Function: chromatin binding (GO:0003682);; Molecular Function: sequence-specific DNA binding transcription factor activity (GO:0003700);; Cellular Component: nucleus (GO:0005634);; Biological Process: organelle organization (GO:0006996);; Biological Process: response to cold (GO:0009409);; Biological Process: response to red or far red ligh…	--	--	[O]	Posttranslational modification, protein turnover, chaperones	Myb-like DNA-binding domain	Protein REVEILLE 1 OS=Arabidopsis thaliana OX=3702 GN=RVE1 PE=2 SV=1	K	Transcription	PREDICTED: protein REVEILLE 1 isoform X2 [Oryza sativa Japonica Group]	-	8	1	28041116
LOC_OS02G40510	--	--	Molecular Function: phosphorelay response regulator activity (GO:0000156);; Biological Process: phosphorelay signal transduction system (GO:0000160);; Molecular Function: DNA binding (GO:0003677);; Molecular Function: sequence-specific DNA binding transcription factor activity (GO:0003700);; Molecular Function: protein binding (GO:0005515);; Cellular Component: nucleus (GO:0005634);; Cellular Com…	K12127|0|osa:4330000|Os02g0618200; K12127 pseudo-response regulator 1 (A)	ko04712:Circadian rhythm - plant	[K]	Transcription	CCT motif;; Response regulator receiver domain	Two-component response regulator-like PRR1 OS=Oryza sativa subsp. japonica OX=39947 GN=PRR1 PE=2 SV=2	K	Transcription	pseudo-response regulator 1 [Oryza sativa Japonica Group]	+	8	1	24572243
LOC_OS05G27110	--	--	Cellular Component: plastid (GO:0009536);;	--	--	--	--	--	--	--	--	unnamed protein product [Oryza sativa Japonica Group]	-	5	2	1577570515775800
LOC_OS03G59450	--	--	Cellular Component: integral component of membrane (GO:0016021);; Cellular Component: cytoplasmic membrane-bounded vesicle (GO:0016023);; Biological Process: transmembrane transport (GO:0055085);;	--	--	[G]	Carbohydrate transport and metabolism	Major Facilitator Superfamily	--	G	Carbohydrate transport and metabolism	PREDICTED: sugar phosphate exchanger 3 [Oryza sativa Japonica Group]	-	3	1	33837948
LOC_OS03G19760	--	--	Biological Process: maltose metabolic process (GO:0000023);; Molecular Function: catalytic activity (GO:0003824);; Cellular Component: chloroplast (GO:0009507);; Cellular Component: chloroplast thylakoid (GO:0009534);; Cellular Component: chloroplast stroma (GO:0009570);; Biological Process: photosynthetic electron transport in photosystem I (GO:0009773);; Biological Process: chloroplast relocati…	--	--	[O]	Posttranslational modification, protein turnover, chaperones	NHL repeat;; Haloacid dehalogenase-like hydrolase;; Thioredoxin-like;; haloacid dehalogenase-like hydrolase;; Redoxin;; AhpC/TSA family;; HAD-hyrolase-like;; Arylesterase	Protein SUPPRESSOR OF QUENCHING 1, chloroplastic OS=Arabidopsis thaliana OX=3702 GN=SOQ1 PE=1 SV=1	S	Function unknown	HAD-superfamily hydrolase, subfamily IA, variant 3 containing protein, expressed [Oryza sativa Japonica Group]	+	8	1	11109172
LOC_OS01G54940	--	--	Molecular Function: nucleotide binding (GO:0000166);; Molecular Function: NADPH:quinone reductase activity (GO:0003960);; Cellular Component: mitochondrion (GO:0005739);; Molecular Function: zinc ion binding (GO:0008270);; Cellular Component: chloroplast envelope (GO:0009941);; Cellular Component: membrane (GO:0016020);; Biological Process: oxidation-reduction process (GO:0055114);; Cellular Comp…	--	--	[CR]	--	Zinc-binding dehydrogenase;; Zinc-binding dehydrogenase;; Alcohol dehydrogenase GroES-like domain	2-methylene-furan-3-one reductase OS=Fragaria ananassa OX=3747 GN=EO PE=1 SV=1	C	Energy production and conversion	PREDICTED: reticulon-4-interacting protein 1, mitochondrial [Oryza sativa Japonica Group]	+	3	1	31604559
LOC_OS06G39080	--	--	Biological Process: metabolic process (GO:0008152);; Molecular Function: transferase activity, transferring hexosyl groups (GO:0016758);; Molecular Function: UDP-glucosyltransferase activity (GO:0035251);; Cellular Component: cytoplasmic part (GO:0044444);; Biological Process: single-organism metabolic process (GO:0044710);; Biological Process: response to stimulus (GO:0050896);; Biological Proce…	--	--	[GC]	--	UDP-glucoronosyl and UDP-glucosyl transferase	Scopoletin glucosyltransferase OS=Nicotiana tabacum OX=4097 GN=TOGT1 PE=1 SV=1	S	Function unknown	PREDICTED: UDP-glycosyltransferase 73B5-like [Oryza sativa Japonica Group]	-	2	1	23204236
LOC_OS03G55640	--	--	Biological Process: proteolysis (GO:0006508);; Molecular Function: serine-type peptidase activity (GO:0008236);; Cellular Component: plastid (GO:0009536);; Cellular Component: integral component of membrane (GO:0016021);; Molecular Function: hydrolase activity (GO:0016787);; Cellular Component: intracellular organelle (GO:0043229);;	K03100|0|obr:102711241|uncharacterized LOC102711241; K03100 signal peptidase I [EC:3.4.21.89] (A)	ko03060:Protein export	[O]	Posttranslational modification, protein turnover, chaperones	Signal peptidase, peptidase S26;; Peptidase S24-like	Thylakoidal processing peptidase 1, chloroplastic OS=Arabidopsis thaliana OX=3702 GN=TPP1 PE=2 SV=2	U	Intracellular trafficking, secretion, and vesicular transport	putative chloroplast thylakoidal processing peptidase [Oryza sativa Japonica Group]	-	6	1	31682216
LOC_OS07G12530	--	--	Biological Process: maltose metabolic process (GO:0000023);; Cellular Component: mitochondrion (GO:0005739);; Cellular Component: plasma membrane (GO:0005886);; Cellular Component: plastoglobule (GO:0010287);; Biological Process: chlorophyll catabolic process (GO:0015996);; Molecular Function: kinase activity (GO:0016301);; Biological Process: phosphorylation (GO:0016310);; Biological Process: st…	--	--	[R]	General function prediction only	ABC1 family	Uncharacterized aarF domain-containing protein kinase At5g05200, chloroplastic OS=Arabidopsis thaliana OX=3702 GN=At5g05200 PE=1 SV=1	S	Function unknown	PREDICTED: uncharacterized aarF domain-containing protein kinase At5g05200, chloroplastic [Oryza sativa Japonica Group]	-	7	2	71528277152850
LOC_OS02G01870	--	--	Cellular Component: mitochondrion (GO:0005739);; Cellular Component: cell periphery (GO:0071944);;	--	--	--	--	Protein of unknown function (DUF1668)	--	--	--	PREDICTED: uncharacterized protein LOC4328030 [Oryza sativa Japonica Group]	+	6	1	483967
LOC_OS08G44380	--	--	Biological Process: RNA methylation (GO:0001510);; Molecular Function: RNA binding (GO:0003723);; Molecular Function: structural constituent of ribosome (GO:0003735);; Cellular Component: nucleolus (GO:0005730);; Cellular Component: plasma membrane (GO:0005886);; Biological Process: rRNA processing (GO:0006364);; Biological Process: translation (GO:0006412);; Cellular Component: plasmodesma (GO:0…	K02865|1.48111e-141|osa:9268245|Os08g0558000; K02865 large subunit ribosomal protein L10Ae (A)	ko03010:Ribosome	[J]	Translation, ribosomal structure and biogenesis	Ribosomal protein L1p/L10e family	60S ribosomal protein L10a OS=Oryza sativa subsp. japonica OX=39947 GN=RPL10A PE=1 SV=1	J	Translation, ribosomal structure and biogenesis	PREDICTED: 60S ribosomal protein L10a [Oryza sativa Japonica Group]	+	16	2	2793169327931670
LOC_OS08G05840	--	--	Biological Process: long-chain fatty acid metabolic process (GO:0001676);; Biological Process: defense response to insect (GO:0002213);; Molecular Function: DNA binding (GO:0003677);; Molecular Function: DNA topoisomerase type I activity (GO:0003917);; Molecular Function: DNA topoisomerase type II (ATP-hydrolyzing) activity (GO:0003918);; Molecular Function: protein binding (GO:0005515);; Cellula…	K03163|0|osa:4344685|Os08g0154600; K03163 DNA topoisomerase I [EC:5.99.1.2] (A)	--	[L]	Replication, recombination and repair	Eukaryotic DNA topoisomerase I, DNA binding fragment;; Eukaryotic DNA topoisomerase I, catalytic core;; C-terminal topoisomerase domain	DNA topoisomerase 1 alpha OS=Arabidopsis thaliana OX=3702 GN=TOP1A PE=1 SV=1	L	Replication, recombination and repair	PREDICTED: DNA topoisomerase 1 [Oryza sativa Japonica Group]	+	12	3	3.13857e+20
LOC_OS01G64780	--	--	--	--	--	--	--	Protein of unknown function (DUF502)	Protein LIKE COV 2 OS=Arabidopsis thaliana OX=3702 GN=LCV2 PE=2 SV=1	S	Function unknown	PREDICTED: protein LIKE COV 2 isoform X1 [Oryza sativa Japonica Group]	-	19	4	3.75849e+31
LOC_OS06G40190	--	--	Molecular Function: phospholipase D activity (GO:0004630);; Molecular Function: calcium ion binding (GO:0005509);; Molecular Function: protein binding (GO:0005515);; Molecular Function: phosphatidylinositol-4,5-bisphosphate binding (GO:0005546);; Cellular Component: nucleus (GO:0005634);; Cellular Component: mitochondrion (GO:0005739);; Cellular Component: vacuole (GO:0005773);; Cellular Componen…	K01115|0|osa:4341469|Os06g0604400; K01115 phospholipase D1/2 [EC:3.1.4.4] (A)	ko00564:Glycerophospholipid metabolism;ko00565:Ether lipid metabolism;ko04144:Endocytosis	[I]	Lipid transport and metabolism	Phospholipase D C terminal;; Phospholipase D Active site motif;; C2 domain;; PLD-like domain	Phospholipase D alpha 2 OS=Oryza sativa subsp. japonica OX=39947 GN=PLD2 PE=2 SV=2	I	Lipid transport and metabolism	PREDICTED: phospholipase D alpha 2 [Oryza sativa Japonica Group]	+	6	1	23932054
LOC_OS02G02050	--	--	Molecular Function: DNA binding (GO:0003677);; Molecular Function: helicase activity (GO:0004386);; Molecular Function: binding (GO:0005488);; Molecular Function: ATP binding (GO:0005524);; Cellular Component: nucleus (GO:0005634);; Biological Process: DNA repair (GO:0006281);; Biological Process: chromatin silencing (GO:0006342);; Biological Process: cell communication (GO:0007154);; Molecular F…	--	--	[R]	General function prediction only	Chromo (CHRromatin Organisation MOdifier) domain;; SNF2 family N-terminal domain	Helicase protein MOM1 OS=Arabidopsis thaliana OX=3702 GN=MOM1 PE=1 SV=1	L	Replication, recombination and repair	hypothetical protein OsJ_05065 [Oryza sativa Japonica Group]	-	5	1	573434
LOC_OS06G40940	--	--	Molecular Function: glycine dehydrogenase (decarboxylating) activity (GO:0004375);; Molecular Function: ATP binding (GO:0005524);; Cellular Component: mitochondrion (GO:0005739);; Cellular Component: glycine cleavage complex (GO:0005960);; Biological Process: glycine catabolic process (GO:0006546);; Cellular Component: chloroplast envelope (GO:0009941);; Cellular Component: membrane (GO:0016020);…	--	--	[E]	Amino acid transport and metabolism	Glycine cleavage system P-protein	Glycine dehydrogenase (decarboxylating) 2, mitochondrial OS=Arabidopsis thaliana OX=3702 GN=GLDP2 PE=1 SV=1	E	Amino acid transport and metabolism	PREDICTED: glycine dehydrogenase (decarboxylating), mitochondrial [Oryza sativa Japonica Group]	-	13	2	2439963824399580
LOC_OS10G32710	--	--	Molecular Function: nucleotide binding (GO:0000166);; Molecular Function: binding (GO:0005488);; Cellular Component: cytosol (GO:0005829);; Biological Process: DNA metabolic process (GO:0006259);; Biological Process: N-terminal protein myristoylation (GO:0006499);; Biological Process: protein targeting to mitochondrion (GO:0006626);; Biological Process: phosphate-containing compound metabolic pro…	--	--	[S]	Function unknown	WD domain, G-beta repeat;; Anaphase-promoting complex subunit 4 WD40 domain;; Eukaryotic translation initiation factor eIF2A	Protein Mut11 OS=Chlamydomonas reinhardtii OX=3055 GN=Mut11 PE=2 SV=1	S	Function unknown	PREDICTED: WD repeat-containing protein 70 [Oryza sativa Japonica Group]	-	4	1	17120766
LOC_OS12G22760	--	--	Molecular Function: protein binding (GO:0005515);; Cellular Component: nucleus (GO:0005634);; Cellular Component: endosome (GO:0005768);; Biological Process: calcium-mediated signaling (GO:0019722);; Cellular Component: BLOC-1 complex (GO:0031083);; Biological Process: late endosome to vacuole transport (GO:0045324);; Biological Process: root development (GO:0048364);;	--	--	[K]	Transcription	GCN5-like protein 1 (GCN5L1)	Biogenesis of lysosome-related organelles complex 1 subunit 1 OS=Arabidopsis thaliana OX=3702 GN=BLOS1 PE=1 SV=1	O	Posttranslational modification, protein turnover, chaperones	hypothetical protein OsI_38101 [Oryza sativa Indica Group]	+	2	1	12851745
LOC_OS07G06710	--	--	Biological Process: protein peptidyl-prolyl isomerization (GO:0000413);; Molecular Function: peptidyl-prolyl cis-trans isomerase activity (GO:0003755);; Molecular Function: protein binding (GO:0005515);; Molecular Function: FK506 binding (GO:0005528);; Cellular Component: endoplasmic reticulum membrane (GO:0005789);; Cellular Component: cytosol (GO:0005829);; Biological Process: response to heat …	--	--	[R]	General function prediction only	Tetratricopeptide repeat;; TPR repeat;; Tetratricopeptide repeat;; Tetratricopeptide repeat	Outer envelope protein 61 OS=Arabidopsis thaliana OX=3702 GN=OEP61 PE=1 SV=1	S	Function unknown	PREDICTED: outer envelope protein 61 [Oryza sativa Japonica Group]	-	12	3	3.27041e+20
LOC_OS10G35220	--	--	Molecular Function: RNA binding (GO:0003723);;	K13162|0|osa:4348996|Os10g0495000; K13162 poly(rC)-binding protein 2/3/4 (A)	--	[AR]	--	KH domain;; KH domain;; KH domain	KH domain-containing protein At4g18375 OS=Arabidopsis thaliana OX=3702 GN=At4g18375 PE=2 SV=1	S	Function unknown	PREDICTED: KH domain-containing protein At4g18375 [Oryza sativa Japonica Group]	+	7	2	1881963218819670
LOC_OS02G07750	--	--	Molecular Function: protein binding (GO:0005515);; Cellular Component: Golgi apparatus (GO:0005794);; Cellular Component: plasma membrane (GO:0005886);; Biological Process: amino acid transport (GO:0006865);; Biological Process: membrane fusion (GO:0006944);; Cellular Component: plastid (GO:0009536);; Cellular Component: chloroplast thylakoid lumen (GO:0009543);; Biological Process: systemic acqu…	--	--	[DKT]	--	LEM3 (ligand-effect modulator 3) family / CDC50 family	ALA-interacting subunit 1 OS=Arabidopsis thaliana OX=3702 GN=ALIS1 PE=1 SV=1	DKT	--	PREDICTED: ALA-interacting subunit 1 [Oryza sativa Japonica Group]	-	3	1	4038494
LOC_OS07G08500	--	--	Molecular Function: DNA binding (GO:0003677);; Molecular Function: DNA (cytosine-5-)-methyltransferase activity (GO:0003886);; Molecular Function: protein binding (GO:0005515);; Cellular Component: nucleus (GO:0005634);; Biological Process: DNA-dependent DNA replication (GO:0006261);; Biological Process: chromatin assembly or disassembly (GO:0006333);; Biological Process: chromatin silencing (GO:…	K00558|0|osa:4342575|Os07g0182900; K00558 DNA (cytosine-5)-methyltransferase 1 [EC:2.1.1.37] (A)	ko00270:Cysteine and methionine metabolism	--	--	C-5 cytosine-specific DNA methylase	DNA (cytosine-5)-methyltransferase 1B OS=Oryza sativa subsp. japonica OX=39947 GN=MET1B PE=2 SV=1	L	Replication, recombination and repair	PREDICTED: DNA (cytosine-5)-methyltransferase 1B [Oryza sativa Japonica Group]	+	3	1	4391924
LOC_OS02G47590	--	--	Molecular Function: ornithine carbamoyltransferase activity (GO:0004585);; Biological Process: purine nucleotide biosynthetic process (GO:0006164);; Biological Process: arginine biosynthetic process (GO:0006526);; Biological Process: ornithine metabolic process (GO:0006591);; Cellular Component: chloroplast (GO:0009507);; Cellular Component: chloroplast stroma (GO:0009570);; Molecular Function: a…	--	--	[E]	Amino acid transport and metabolism	Aspartate/ornithine carbamoyltransferase, Asp/Orn binding domain;; Aspartate/ornithine carbamoyltransferase, carbamoyl-P binding domain	Ornithine carbamoyltransferase, chloroplastic OS=Pisum sativum OX=3888 GN=ARGF PE=2 SV=1	E	Amino acid transport and metabolism	PREDICTED: ornithine carbamoyltransferase, chloroplastic isoform X1 [Oryza sativa Japonica Group]	+	2	1	29081206
LOC_OS05G23600	--	--	Biological Process: RNA splicing, via endonucleolytic cleavage and ligation (GO:0000394);; Molecular Function: dolichyl-diphosphooligosaccharide-protein glycotransferase activity (GO:0004579);; Cellular Component: vacuolar membrane (GO:0005774);; Cellular Component: endoplasmic reticulum membrane (GO:0005789);; Cellular Component: Golgi apparatus (GO:0005794);; Cellular Component: plasma membrane…	K12666|0|osa:4338348|Os05g0301500; K12666 oligosaccharyltransferase complex subunit alpha (ribophorin I) (A)	ko00510:N-Glycan biosynthesis;ko04141:Protein processing in endoplasmic reticulum	[O]	Posttranslational modification, protein turnover, chaperones	Ribophorin I	Dolichyl-diphosphooligosaccharide--protein glycosyltransferase subunit 1A OS=Oryza sativa subsp. japonica OX=39947 GN=OST1A PE=2 SV=1	S	Function unknown	PREDICTED: dolichyl-diphosphooligosaccharide--protein glycosyltransferase subunit 1A [Oryza sativa Japonica Group]	+	17	2	1353426513534290
LOC_OS07G30670	--	--	Biological Process: pentose-phosphate shunt (GO:0006098);; Molecular Function: electron carrier activity (GO:0009055);; Cellular Component: chloroplast thylakoid membrane (GO:0009535);; Biological Process: photosynthetic electron transport in photosystem I (GO:0009773);; Cellular Component: NAD(P)H dehydrogenase complex (plastoquinone) (GO:0010598);; Biological Process: starch biosynthetic proces…	--	--	--	--	2Fe-2S iron-sulfur cluster binding domain	Photosynthetic NDH subunit of subcomplex B 3, chloroplastic OS=Arabidopsis thaliana OX=3702 GN=PNSB3 PE=2 SV=1	C	Energy production and conversion	PREDICTED: photosynthetic NDH subunit of subcomplex B 3, chloroplastic [Oryza sativa Japonica Group]	+	3	1	18150695
LOC_OS07G33300	--	--	--	--	--	--	--	Transposase-associated domain	--	S	Function unknown	PREDICTED: uncharacterized protein LOC4343382 [Oryza sativa Japonica Group]	-	4	1	19906340
LOC_OS03G60950	--	--	Cellular Component: cytoplasmic membrane-bounded vesicle (GO:0016023);;	--	--	--	--	--	--	S	Function unknown	unknown protein [Oryza sativa Japonica Group]	-	10	2	3463366934633690
LOC_OS01G53070	--	--	Molecular Function: DNA binding (GO:0003677);; Molecular Function: DNA-directed DNA polymerase activity (GO:0003887);; Molecular Function: ATP binding (GO:0005524);; Cellular Component: plasma membrane (GO:0005886);; Biological Process: DNA replication (GO:0006260);; Cellular Component: DNA polymerase III complex (GO:0009360);; Cellular Component: plastid (GO:0009536);; Biological Process: anatom…	--	--	[L]	Replication, recombination and repair	DNA polymerase III, delta subunit;; DNA polymerase III subunits gamma and tau domain III	Protein STICHEL-like 3 OS=Arabidopsis thaliana OX=3702 GN=At4g18820 PE=3 SV=1	L	Replication, recombination and repair	PREDICTED: protein STICHEL-like 3 isoform X1 [Oryza sativa Japonica Group]	-	4	1	30490744
LOC_OS06G50330	--	--	Cellular Component: plasma membrane (GO:0005886);; Biological Process: response to cold (GO:0009409);; Biological Process: response to water deprivation (GO:0009414);; Biological Process: response to high light intensity (GO:0009644);; Biological Process: response to salt stress (GO:0009651);; Biological Process: cellular component organization (GO:0016043);; Molecular Function: kinase activity (…	--	--	--	--	Senescence-associated protein	Protein EARLY-RESPONSIVE TO DEHYDRATION 7, chloroplastic OS=Arabidopsis thaliana OX=3702 GN=ERD7 PE=1 SV=1	S	Function unknown	PREDICTED: uncharacterized protein LOC4342079 [Oryza sativa Japonica Group]	-	13	2	3046501730464960
LOC_OS11G47330	--	--	Molecular Function: ATP citrate synthase activity (GO:0003878);; Molecular Function: ATP binding (GO:0005524);; Cellular Component: cytosol (GO:0005829);; Biological Process: acetyl-CoA biosynthetic process (GO:0006085);; Biological Process: protein targeting to vacuole (GO:0006623);; Biological Process: lipid metabolic process (GO:0006629);; Biological Process: fatty acid biosynthetic process (G…	--	--	[C]	Energy production and conversion	ATP citrate lyase citrate-binding;; ATP-grasp domain	ATP-citrate synthase alpha chain protein 2 OS=Oryza sativa subsp. japonica OX=39947 GN=ACLA-2 PE=2 SV=2	C	Energy production and conversion	PREDICTED: ATP-citrate synthase alpha chain protein 2 [Oryza sativa Japonica Group]	+	16	1	28478020
LOC_OS02G44820	--	--	Molecular Function: nucleotide binding (GO:0000166);; Molecular Function: protein serine/threonine kinase activity (GO:0004674);; Molecular Function: ion binding (GO:0043167);; Biological Process: cellular metabolic process (GO:0044237);; Cellular Component: intracellular part (GO:0044424);; Biological Process: organic substance metabolic process (GO:0071704);;	--	--	[BK]	--	Divergent CRAL/TRIO domain	--	S	Function unknown	PREDICTED: ganglioside-induced differentiation-associated protein 2 [Oryza sativa Japonica Group]	-	9	1	27137228
LOC_OS07G30120	--	--	Cellular Component: plastid (GO:0009536);;	--	--	--	--	--	--	--	--	expressed protein [Oryza sativa Japonica Group]	+	2	1	17776586
LOC_OS10G30510	--	--	Molecular Function: DNA binding (GO:0003677);; Molecular Function: binding (GO:0005488);; Cellular Component: nucleus (GO:0005634);; Cellular Component: cytosol (GO:0005829);; Biological Process: DNA recombination (GO:0006310);; Molecular Function: zinc ion binding (GO:0008270);; Molecular Function: electron carrier activity (GO:0009055);; Biological Process: response to cold (GO:0009409);; Cellu…	--	--	[R]	General function prediction only	Reverse transcriptase (RNA-dependent DNA polymerase);; gag-polypeptide of LTR copia-type;; Retrotransposon gag protein	Retrovirus-related Pol polyprotein from transposon RE2 OS=Arabidopsis thaliana OX=3702 GN=RE2 PE=4 SV=1	S	Function unknown	retrotransposon protein, putative, Ty1-copia subclass [Oryza sativa Japonica Group]	+	4	1	15865603
LOC_OS03G51690	--	--	Biological Process: cell fate specification (GO:0001708);; Molecular Function: sequence-specific DNA binding transcription factor activity (GO:0003700);; Molecular Function: protein binding (GO:0005515);; Cellular Component: nucleus (GO:0005634);; Biological Process: regulation of transcription, DNA-templated (GO:0006355);; Biological Process: fatty acid catabolic process (GO:0009062);; Cellular …	--	--	[K]	Transcription	KNOX2 domain;; KNOX1 domain;; Homeobox KN domain;; ELK domain;; Homeobox domain	Homeobox protein knotted-1-like 6 OS=Oryza sativa subsp. japonica OX=39947 GN=OSH1 PE=2 SV=2	K	Transcription	homeobox protein [Oryza sativa Japonica Group]	-	4	1	29596369
LOC_OS06G45280	--	--	Biological Process: RNA splicing, via endonucleolytic cleavage and ligation (GO:0000394);; Biological Process: respiratory burst involved in defense response (GO:0002679);; Molecular Function: protein serine/threonine kinase activity (GO:0004674);; Molecular Function: protein binding (GO:0005515);; Molecular Function: ATP binding (GO:0005524);; Cellular Component: nucleolus (GO:0005730);; Cellula…	--	--	[T]	Signal transduction mechanisms	Protein kinase domain;; Protein tyrosine kinase	Probable serine/threonine-protein kinase PBL17 OS=Arabidopsis thaliana OX=3702 GN=PBL17 PE=1 SV=1	T	Signal transduction mechanisms	PREDICTED: serine/threonine-protein kinase At5g01020 [Oryza sativa Japonica Group]	-	8	2	2736397127363880
LOC_OS01G70950	--	--	Molecular Function: catalytic activity (GO:0003824);; Biological Process: metabolic process (GO:0008152);; Cellular Component: chloroplast (GO:0009507);;	K00943|0|osa:4326794|Os01g0935600; K00943 dTMP kinase [EC:2.7.4.9] (A)	ko00240:Pyrimidine metabolism	[R]	General function prediction only	--	--	O	Posttranslational modification, protein turnover, chaperones	hypothetical protein OsJ_04681 [Oryza sativa Japonica Group]	-	7	2	4106713341067030
LOC_OS04G27800	--	--	Cellular Component: mitochondrion (GO:0005739);; Cellular Component: plastid (GO:0009536);;	--	--	--	--	--	--	--	--	hypothetical protein OsJ_01748 [Oryza sativa Japonica Group]	-	6	1	16425529
LOC_OS01G61010	--	--	Cellular Component: membrane (GO:0016020);; Cellular Component: nuclear part (GO:0044428);;	--	--	--	--	Nodulin-like	Protein NUCLEAR FUSION DEFECTIVE 4 OS=Arabidopsis thaliana OX=3702 GN=NFD4 PE=3 SV=1	S	Function unknown	PREDICTED: protein NUCLEAR FUSION DEFECTIVE 4 [Oryza sativa Japonica Group]	-	11	2	3530347035303440
LOC_OS01G15630	--	--	Molecular Function: zinc ion binding (GO:0008270);;	--	--	--	--	Ring finger domain;; Zinc finger, C3HC4 type (RING finger)	--	S	Function unknown	PREDICTED: uncharacterized protein LOC4325119 isoform X1 [Oryza sativa Japonica Group]	+	4	1	8792287
LOC_OS06G22650	--	--	Cellular Component: intracellular (GO:0005622);; Biological Process: intracellular protein transport (GO:0006886);;	--	--	[U]	Intracellular trafficking, secretion, and vesicular transport	VHS domain;; GAT domain	TOM1-like protein 9 OS=Arabidopsis thaliana OX=3702 GN=TOL9 PE=1 SV=1	S	Function unknown	PREDICTED: target of Myb protein 1 [Oryza sativa Japonica Group]	+	7	1	13170824
LOC_OS10G40100	--	--	Biological Process: transition metal ion transport (GO:0000041);; Cellular Component: ubiquitin ligase complex (GO:0000151);; Molecular Function: protein serine/threonine kinase activity (GO:0004674);; Molecular Function: ubiquitin-protein transferase activity (GO:0004842);; Molecular Function: ATP binding (GO:0005524);; Cellular Component: plasma membrane (GO:0005886);; Biological Process: prote…	--	--	--	--	Protein kinase domain;; Protein tyrosine kinase;; U-box domain	U-box domain-containing protein 70 OS=Oryza sativa subsp. japonica OX=39947 GN=PUB70 PE=1 SV=1	T	Signal transduction mechanisms	PREDICTED: U-box domain-containing protein 33 [Oryza sativa Japonica Group]	-	2	1	21467610
LOC_OS03G16369	--	--	Molecular Function: protein binding (GO:0005515);; Biological Process: mRNA processing (GO:0006397);; Biological Process: RNA splicing (GO:0008380);; Biological Process: DNA mediated transformation (GO:0009294);; Biological Process: regulation of gene expression (GO:0010468);; Cellular Component: membrane (GO:0016020);; Cellular Component: nuclear body (GO:0016604);; Biological Process: regulatio…	K13171|0|osa:4332383|Os03g0270200; K13171 serine/arginine repetitive matrix protein 1 (A)	ko03013:RNA transport;ko03015:mRNA surveillance pathway	[AR]	--	PWI domain	--	S	Function unknown	hypothetical protein OsJ_10288 [Oryza sativa Japonica Group]	-	8	2	90295289029636
LOC_OS07G40974	--	--	Molecular Function: nucleic acid binding (GO:0003676);; Molecular Function: catalytic activity (GO:0003824);; Molecular Function: protein binding (GO:0005515);; Cellular Component: endoplasmic reticulum (GO:0005783);; Biological Process: RNA processing (GO:0006396);; Biological Process: transport (GO:0006810);; Biological Process: defense response (GO:0006952);; Biological Process: response to os…	--	--	[V]	Defense mechanisms	NAD dependent epimerase/dehydratase family;; NAD(P)H-binding;; 3-beta hydroxysteroid dehydrogenase/isomerase family;; NmrA-like family;; Male sterility protein	Putative anthocyanidin reductase OS=Ginkgo biloba OX=3311 PE=2 SV=1	M	Cell wall/membrane/envelope biogenesis	PREDICTED: anthocyanidin reductase [Oryza sativa Japonica Group]	-	4	1	24515343
LOC_OS11G18570	--	--	Molecular Function: monooxygenase activity (GO:0004497);; Molecular Function: iron ion binding (GO:0005506);; Biological Process: alcohol metabolic process (GO:0006066);; Biological Process: steroid biosynthetic process (GO:0006694);; Molecular Function: electron carrier activity (GO:0009055);; Biological Process: response to UV (GO:0009411);; Biological Process: unidimensional cell growth (GO:00…	--	--	[QI]	--	Cytochrome P450	Cytochrome P450 87A3 OS=Oryza sativa subsp. japonica OX=39947 GN=CYP87A3 PE=2 SV=3	Q	Secondary metabolites biosynthesis, transport and catabolism	PREDICTED: cytochrome P450 87A3-like [Oryza sativa Japonica Group]	+	12	1	10477733
LOC_OS10G41400	--	--	Biological Process: cell morphogenesis (GO:0000902);; Cellular Component: cytosol (GO:0005829);; Biological Process: cellular protein modification process (GO:0006464);; Biological Process: membrane fusion (GO:0006944);; Molecular Function: peptide-methionine (S)-S-oxide reductase activity (GO:0008113);; Biological Process: response to light stimulus (GO:0009416);; Cellular Component: chloroplast…	K07304|8.20762e-141|osa:4349402|Os10g0563600; K07304 peptide-methionine (S)-S-oxide reductase [EC:1.8.4.11] (A)	--	[O]	Posttranslational modification, protein turnover, chaperones	Peptide methionine sulfoxide reductase	Peptide methionine sulfoxide reductase A4, chloroplastic OS=Oryza sativa subsp. japonica OX=39947 GN=MSRA4 PE=2 SV=2	O	Posttranslational modification, protein turnover, chaperones	PREDICTED: peptide methionine sulfoxide reductase A4, chloroplastic [Oryza sativa Japonica Group]	+	3	1	22257075
LOC_OS06G48534	--	--	Biological Process: defense response to insect (GO:0002213);; Molecular Function: sequence-specific DNA binding transcription factor activity (GO:0003700);; Molecular Function: chitinase activity (GO:0004568);; Molecular Function: binding (GO:0005488);; Cellular Component: extracellular region (GO:0005576);; Cellular Component: cell wall (GO:0005618);; Cellular Component: nucleus (GO:0005634);; B…	--	--	[K]	Transcription	CCT motif;; GATA zinc finger;; tify domain;; Divergent CCT motif	GATA transcription factor 20 OS=Oryza sativa subsp. japonica OX=39947 GN=GATA20 PE=2 SV=1	K	Transcription	Os06g0698900 [Oryza sativa Japonica Group]	-	3	1	29365978
LOC_OS06G08280	--	--	Biological Process: phosphorelay signal transduction system (GO:0000160);; Biological Process: defense response to oomycetes (GO:0002229);; Molecular Function: protein serine/threonine kinase activity (GO:0004674);; Molecular Function: MAP kinase kinase kinase activity (GO:0004709);; Molecular Function: protein binding (GO:0005515);; Molecular Function: ATP binding (GO:0005524);; Cellular Compone…	--	--	[T]	Signal transduction mechanisms	Protein tyrosine kinase;; Protein kinase domain;; PB1 domain	Probable serine/threonine-protein kinase SIS8 OS=Arabidopsis thaliana OX=3702 GN=SIS8 PE=1 SV=1	T	Signal transduction mechanisms	PREDICTED: uncharacterized protein LOC4340309 [Oryza sativa Japonica Group]	+	8	2	40134224013454
LOC_OS04G45800	--	--	Molecular Function: diacylglycerol kinase activity (GO:0004143);; Cellular Component: mitochondrion (GO:0005739);; Cellular Component: plasma membrane (GO:0005886);; Biological Process: protein glycosylation (GO:0006486);; Biological Process: protein kinase C-activating G-protein coupled receptor signaling pathway (GO:0007205);; Biological Process: cell death (GO:0008219);; Molecular Function: sp…	--	--	[IT]	--	Diacylglycerol kinase catalytic domain	Sphingoid long-chain bases kinase 1 OS=Arabidopsis thaliana OX=3702 GN=LCBK1 PE=1 SV=1	I	Lipid transport and metabolism	PREDICTED: sphingoid long-chain bases kinase 1 isoform X1 [Oryza sativa Japonica Group]	+	4	1	27118461
LOC_OS09G30150	--	--	Biological Process: microtubule cytoskeleton organization (GO:0000226);; Biological Process: mitotic cell cycle (GO:0000278);; Biological Process: cytokinesis by cell plate formation (GO:0000911);; Molecular Function: protein serine/threonine kinase activity (GO:0004674);; Molecular Function: ATP binding (GO:0005524);; Cellular Component: nucleolus (GO:0005730);; Cellular Component: cytoplasm (GO…	--	--	[R]	General function prediction only	Protein kinase domain;; Protein tyrosine kinase	Serine/threonine-protein kinase D6PKL2 OS=Arabidopsis thaliana OX=3702 GN=D6PKL2 PE=1 SV=1	T	Signal transduction mechanisms	PREDICTED: serine/threonine-protein kinase D6PK [Oryza sativa Japonica Group]	+	16	2	1834353318343510
LOC_OS03G55590	--	--	Molecular Function: DNA binding (GO:0003677);; Molecular Function: chromatin binding (GO:0003682);; Molecular Function: sequence-specific DNA binding transcription factor activity (GO:0003700);; Molecular Function: protein binding (GO:0005515);; Cellular Component: nucleus (GO:0005634);; Biological Process: circadian rhythm (GO:0007623);; Biological Process: cytokinin-activated signaling pathway …	--	--	--	--	Myb-like DNA-binding domain	Myb family transcription factor EFM OS=Arabidopsis thaliana OX=3702 GN=EFM PE=1 SV=2	K	Transcription	PREDICTED: uncharacterized protein LOC4334216 [Oryza sativa Japonica Group]	+	13	2	3164586231645950
LOC_OS04G31900	--	--	Molecular Function: DNA binding (GO:0003677);; Molecular Function: binding (GO:0005488);; Cellular Component: nucleus (GO:0005634);; Cellular Component: cytosol (GO:0005829);; Biological Process: response to stress (GO:0006950);; Biological Process: gene expression (GO:0010467);; Biological Process: RNA metabolic process (GO:0016070);; Biological Process: single-organism process (GO:0044699);; Bi…	--	--	[S]	Function unknown	CG-1 domain;; IQ calmodulin-binding motif;; Ankyrin repeats (3 copies);; IPT/TIG domain;; Ankyrin repeats (many copies);; Ankyrin repeat	Calmodulin-binding transcription activator 4 OS=Arabidopsis thaliana OX=3702 GN=CAMTA4 PE=1 SV=1	K	Transcription	PREDICTED: calmodulin-binding transcription activator 4 isoform X2 [Oryza sativa Japonica Group]	+	8	1	19113529
LOC_OS06G04169	--	--	Biological Process: regulation of neurotransmitter levels (GO:0001505);; Molecular Function: histamine receptor activity (GO:0004969);; Molecular Function: binding (GO:0005488);; Biological Process: G-protein coupled receptor signaling pathway (GO:0007186);; Biological Process: cellular process (GO:0009987);; Cellular Component: integral component of membrane (GO:0016021);; Cellular Component: cy…	--	--	[R]	General function prediction only	alpha/beta hydrolase fold;; Alpha/beta hydrolase family;; Serine aminopeptidase, S33;; Serine hydrolase	Probable lysophospholipase BODYGUARD 3 OS=Arabidopsis thaliana OX=3702 GN=BDG3 PE=2 SV=1	S	Function unknown	PREDICTED: uncharacterized protein LOC4340016 [Oryza sativa Japonica Group]	-	5	1	1736868
LOC_OS02G05030	--	--	Molecular Function: magnesium ion binding (GO:0000287);; Cellular Component: extracellular region (GO:0005576);; Cellular Component: nucleus (GO:0005634);; Cellular Component: vacuolar membrane (GO:0005774);; Cellular Component: endoplasmic reticulum membrane (GO:0005789);; Cellular Component: cytosol (GO:0005829);; Cellular Component: plasma membrane (GO:0005886);; Biological Process: sucrose bi…	--	--	--	--	Sucrose-6F-phosphate phosphohydrolase;; Sucrose-6-phosphate phosphohydrolase C-terminal;; haloacid dehalogenase-like hydrolase	Sucrose-phosphatase 2 OS=Oryza sativa subsp. japonica OX=39947 GN=SPP2 PE=1 SV=1	S	Function unknown	hypothetical protein OsJ_05345 [Oryza sativa Japonica Group]	+	8	2	23943452394321
LOC_OS01G66700	--	--	Molecular Function: beta-N-acetylhexosaminidase activity (GO:0004563);; Cellular Component: vacuole (GO:0005773);; Cellular Component: cytosol (GO:0005829);; Cellular Component: plasma membrane (GO:0005886);; Biological Process: carbohydrate metabolic process (GO:0005975);; Cellular Component: plant-type cell wall (GO:0009505);; Cellular Component: cytoplasmic membrane-bounded vesicle (GO:0016023…	K12373|0|osa:4324914|Os01g0891000; K12373 hexosaminidase [EC:3.2.1.52] (A)	ko00511:Other glycan degradation;ko00520:Amino sugar and nucleotide sugar metabolism;ko00531:Glycosaminoglycan degradation;ko00603:Glycosphingolipid biosynthesis - globo series;ko00604:Glycosphingolipid biosynthesis - ganglio series	[G]	Carbohydrate transport and metabolism	Glycosyl hydrolase family 20, catalytic domain;; beta-acetyl hexosaminidase like	Beta-hexosaminidase 3 OS=Arabidopsis thaliana OX=3702 GN=HEXO3 PE=1 SV=1	G	Carbohydrate transport and metabolism	PREDICTED: beta-hexosaminidase 3 [Oryza sativa Japonica Group]	-	7	2	3874005838740100
LOC_OS05G04380	--	--	Molecular Function: catalytic activity (GO:0003824);; Molecular Function: peroxidase activity (GO:0004601);; Molecular Function: binding (GO:0005488);; Cellular Component: extracellular region (GO:0005576);; Biological Process: ion transport (GO:0006811);; Biological Process: response to stress (GO:0006950);; Biological Process: response to oxidative stress (GO:0006979);; Cellular Component: plan…	--	--	--	--	Peroxidase	Peroxidase 2 OS=Zea mays OX=4577 GN=PER2 PE=2 SV=1	S	Function unknown	PREDICTED: peroxidase 2 [Oryza sativa Japonica Group]	+	58	5	2.01495e+34
LOC_OS08G36774	--	--	Molecular Function: zinc ion binding (GO:0008270);;	K06874|0|osa:4345806|Os08g0471900; K06874 zinc finger protein (A)	--	[R]	General function prediction only	ZPR1 zinc-finger domain	--	S	Function unknown	PREDICTED: zinc finger protein zpr1 isoform X1 [Oryza sativa Japonica Group]	-	8	2	2321915423219210
LOC_OS12G05110	--	--	Molecular Function: magnesium ion binding (GO:0000287);; Molecular Function: pyruvate kinase activity (GO:0004743);; Cellular Component: plasma membrane (GO:0005886);; Biological Process: glucose metabolic process (GO:0006006);; Biological Process: glycolytic process (GO:0006096);; Biological Process: lipid metabolic process (GO:0006629);; Cellular Component: plastid (GO:0009536);; Biological Pro…	K00873|0|osa:4351493|Os12g0145700; K00873 pyruvate kinase [EC:2.7.1.40] (A)	ko00010:Glycolysis / Gluconeogenesis;ko00230:Purine metabolism;ko00620:Pyruvate metabolism;ko01200:Carbon metabolism;ko01230:Biosynthesis of amino acids	[G]	Carbohydrate transport and metabolism	Pyruvate kinase, barrel domain;; Pyruvate kinase, alpha/beta domain	Pyruvate kinase 2, cytosolic OS=Oryza sativa subsp. japonica OX=39947 GN=Os12g0145700 PE=2 SV=1	G	Carbohydrate transport and metabolism	PREDICTED: pyruvate kinase 2, cytosolic [Oryza sativa Japonica Group]	-	68	6	2.24555e+41
LOC_OS03G01016	--	--	Cellular Component: integral component of nuclear inner membrane (GO:0005639);; Cellular Component: endoplasmic reticulum (GO:0005783);; Cellular Component: chloroplast thylakoid lumen (GO:0009543);;	--	--	--	--	Man1-Src1p-C-terminal domain	--	S	Function unknown	PREDICTED: uncharacterized protein LOC9266989 [Oryza sativa Japonica Group]	-	4	1	20293
LOC_OS04G40850	--	--	Cellular Component: proteasome complex (GO:0000502);; Biological Process: tRNA wobble uridine modification (GO:0002098);; Molecular Function: histone acetyltransferase activity (GO:0004402);; Cellular Component: nucleus (GO:0005634);; Cellular Component: nuclear euchromatin (GO:0005719);; Cellular Component: cytosol (GO:0005829);; Cellular Component: plasma membrane (GO:0005886);; Biological Proc…	K03037|0|osa:4336206|Os04g0485000; K03037 26S proteasome regulatory subunit N7 (A)	ko03050:Proteasome	[O]	Posttranslational modification, protein turnover, chaperones	26S proteasome subunit RPN7;; PCI domain	26S proteasome non-ATPase regulatory subunit 6 OS=Oryza sativa subsp. japonica OX=39947 GN=RPN7 PE=2 SV=1	O	Posttranslational modification, protein turnover, chaperones	PREDICTED: 26S proteasome non-ATPase regulatory subunit 6 [Oryza sativa Japonica Group]	+	11	3	2.42437e+23
LOC_OS06G06290	--	--	Cellular Component: cell wall (GO:0005618);; Cellular Component: vacuole (GO:0005773);; Biological Process: lipid metabolic process (GO:0006629);; Cellular Component: cytoplasmic membrane-bounded vesicle (GO:0016023);; Molecular Function: hydrolase activity, acting on ester bonds (GO:0016788);; Biological Process: primary metabolic process (GO:0044238);; Biological Process: single-organism cellul…	--	--	--	--	GDSL-like Lipase/Acylhydrolase	GDSL esterase/lipase At5g45910 OS=Arabidopsis thaliana OX=3702 GN=At5g45910 PE=2 SV=1	S	Function unknown	PREDICTED: GDSL esterase/lipase At5g45910 [Oryza sativa Japonica Group]	-	27	2	29080572908090
LOC_OS02G51140	--	--	Cellular Component: plastid (GO:0009536);;	--	--	--	--	Development and cell death domain	B2 protein OS=Daucus carota OX=4039 PE=2 SV=1	S	Function unknown	PREDICTED: uncharacterized protein LOC4330717 isoform X1 [Oryza sativa Japonica Group]	+	11	3	3.12989e+23
LOC_OS11G09010	--	--	Biological Process: MAPK cascade (GO:0000165);; Biological Process: response to hypoxia (GO:0001666);; Biological Process: defense response to insect (GO:0002213);; Biological Process: respiratory burst involved in defense response (GO:0002679);; Molecular Function: triglyceride lipase activity (GO:0004806);; Molecular Function: protein binding (GO:0005515);; Biological Process: regulation of tra…	--	--	--	--	Lipase (class 3)	Lipase-like PAD4 OS=Arabidopsis thaliana OX=3702 GN=PAD4 PE=1 SV=1	S	Function unknown	PREDICTED: lipase-like PAD4 isoform X1 [Oryza sativa Japonica Group]	+	15	2	47892984789372
LOC_OS06G13060	--	--	Cellular Component: nucleus (GO:0005634);; Cellular Component: mitochondrion (GO:0005739);; Cellular Component: endoplasmic reticulum lumen (GO:0005788);; Cellular Component: Golgi stack (GO:0005795);; Cellular Component: plasma membrane (GO:0005886);; Biological Process: DNA-dependent DNA replication (GO:0006261);; Biological Process: protein folding (GO:0006457);; Biological Process: ER-nucleus…	--	--	[O]	Posttranslational modification, protein turnover, chaperones	DnaJ domain	Chaperone protein dnaJ 16 OS=Arabidopsis thaliana OX=3702 GN=ATJ16 PE=2 SV=1	O	Posttranslational modification, protein turnover, chaperones	PREDICTED: chaperone protein dnaJ 16 [Oryza sativa Japonica Group]	-	9	1	7160042
LOC_OS03G07880	--	--	Molecular Function: DNA binding (GO:0003677);; Molecular Function: sequence-specific DNA binding transcription factor activity (GO:0003700);; Biological Process: regulation of transcription, DNA-templated (GO:0006355);; Biological Process: response to water deprivation (GO:0009414);; Biological Process: abscisic acid-activated signaling pathway (GO:0009738);; Biological Process: blue light signal…	K08064|1.11033e-163|osa:4331796|Os03g0174900; K08064 nuclear transcription factor Y, alpha (A)	--	[K]	Transcription	CCAAT-binding transcription factor (CBF-B/NF-YA) subunit B	Nuclear transcription factor Y subunit A-6 OS=Arabidopsis thaliana OX=3702 GN=NFYA6 PE=1 SV=1	K	Transcription	PREDICTED: nuclear transcription factor Y subunit A-7 [Oryza sativa Japonica Group]	-	5	1	4002146
LOC_OS01G57220	--	--	Cellular Component: mitochondrion (GO:0005739);; Cellular Component: early endosome (GO:0005769);; Cellular Component: Golgi apparatus (GO:0005794);; Cellular Component: trans-Golgi network (GO:0005802);; Cellular Component: cytosol (GO:0005829);; Cellular Component: plasma membrane (GO:0005886);; Biological Process: receptor-mediated endocytosis (GO:0006898);; Biological Process: membrane fusion…	--	--	[U]	Intracellular trafficking, secretion, and vesicular transport	SCAMP family	Secretory carrier-associated membrane protein 2 OS=Oryza sativa subsp. japonica OX=39947 GN=SCAMP2 PE=2 SV=1	U	Intracellular trafficking, secretion, and vesicular transport	PREDICTED: secretory carrier-associated membrane protein 2 [Oryza sativa Japonica Group]	+	4	1	33064763
LOC_OS04G36050	--	--	Cellular Component: mitochondrion (GO:0005739);; Cellular Component: endoplasmic reticulum (GO:0005783);; Cellular Component: membrane (GO:0016020);;	--	--	[R]	General function prediction only	Cleft lip and palate transmembrane protein 1 (CLPTM1);; PQ loop repeat	--	S	Function unknown	PREDICTED: CLPTM1-like membrane protein cnrB [Oryza sativa Japonica Group]	-	9	2	2198959121989620
LOC_OS12G42100	--	--	Cellular Component: nucleus (GO:0005634);; Cellular Component: plastid (GO:0009536);; Molecular Function: hydrolase activity (GO:0016787);;	--	--	--	--	Beta-lactamase superfamily domain	--	S	Function unknown	PREDICTED: putative hydrolase C777.06c [Oryza sativa Japonica Group]	-	3	1	26104161
LOC_OS06G35410	--	--	Cellular Component: intracellular membrane-bounded organelle (GO:0043231);; Cellular Component: cytoplasmic part (GO:0044444);;	--	--	--	--	GDP-fucose protein O-fucosyltransferase	O-fucosyltransferase 8 OS=Arabidopsis thaliana OX=3702 GN=OFUT8 PE=2 SV=1	S	Function unknown	PREDICTED: uncharacterized protein At1g04910 [Oryza sativa Japonica Group]	-	4	1	20635354
LOC_OS08G15170	--	--	Cellular Component: mitochondrial proton-transporting ATP synthase complex, catalytic core F(1) (GO:0000275);; Cellular Component: mitochondrial proton-transporting ATP synthase, catalytic core (GO:0005754);; Biological Process: photorespiration (GO:0009853);; Biological Process: ATP synthesis coupled proton transport (GO:0015986);; Molecular Function: proton-transporting ATP synthase activity, r…	K02135|2.33921e-39|osa:4345078|Os08g0250200; K02135 F-type H+-transporting ATPase subunit epsilon (A)	ko00190:Oxidative phosphorylation	[C]	Energy production and conversion	Mitochondrial ATP synthase epsilon chain	ATP synthase subunit epsilon, mitochondrial OS=Zea mays OX=4577 PE=3 SV=1	C	Energy production and conversion	putative ATP synthase epsilon chain, mitochondrial [Oryza sativa Japonica Group]	-	12	3	9.17737e+20
LOC_OS02G04450	--	--	--	--	--	--	--	Plant protein 1589 of unknown function (A_thal_3526)	--	S	Function unknown	PREDICTED: uncharacterized protein LOC4328235 isoform X1 [Oryza sativa Japonica Group]	+	9	1	1972761
LOC_OS01G14950	--	--	Biological Process: microtubule cytoskeleton organization (GO:0000226);; Biological Process: cytokinesis by cell plate formation (GO:0000911);; Molecular Function: protein binding (GO:0005515);; Cellular Component: cell wall (GO:0005618);; Cellular Component: nuclear envelope (GO:0005635);; Cellular Component: nucleolus (GO:0005730);; Cellular Component: cytosol (GO:0005829);; Biological Process:…	--	--	[U]	Intracellular trafficking, secretion, and vesicular transport	Armadillo/beta-catenin-like repeat;; Importin beta binding domain;; HEAT-like repeat;; Atypical Arm repeat;; HEAT repeats;; HEAT repeat;; Armadillo-like	Importin subunit alpha-1a OS=Oryza sativa subsp. japonica OX=39947 GN=Os01g0253300 PE=1 SV=2	U	Intracellular trafficking, secretion, and vesicular transport	PREDICTED: importin subunit alpha-1a [Oryza sativa Japonica Group]	+	36	2	83872308387040
LOC_OS10G38900	--	--	Biological Process: microtubule cytoskeleton organization (GO:0000226);; Cellular Component: trans-Golgi network (GO:0005802);; Cellular Component: cytosol (GO:0005829);; Biological Process: chromatin silencing (GO:0006342);; Biological Process: cell adhesion (GO:0007155);; Biological Process: regulation of cell shape (GO:0008360);; Biological Process: response to light stimulus (GO:0009416);; Ce…	--	--	[K]	Transcription	D-isomer specific 2-hydroxyacid dehydrogenase, NAD binding domain	C-terminal binding protein AN OS=Arabidopsis thaliana OX=3702 GN=AN PE=1 SV=1	C	Energy production and conversion	PREDICTED: C-terminal binding protein AN [Oryza sativa Japonica Group]	+	2	1	20729544
LOC_OS07G34589	--	--	Molecular Function: translation initiation factor activity (GO:0003743);; Cellular Component: nucleus (GO:0005634);; Cellular Component: cytoplasm (GO:0005737);; Biological Process: DNA repair (GO:0006281);; Biological Process: translational initiation (GO:0006413);; Biological Process: regulation of translation (GO:0006417);; Biological Process: virus induced gene silencing (GO:0009616);; Biolog…	K03113|6.63738e-68|osa:4343445|Os07g0529800; K03113 translation initiation factor 1 (A)	ko03013:RNA transport	[J]	Translation, ribosomal structure and biogenesis	Translation initiation factor SUI1	Protein translation factor SUI1 homolog OS=Oryza sativa subsp. japonica OX=39947 GN=GOS2 PE=3 SV=1	J	Translation, ribosomal structure and biogenesis	PREDICTED: protein translation factor SUI1 homolog [Oryza sativa Japonica Group]	-	106	2	2073323520733210
LOC_OS06G38970	--	--	Biological Process: developmental process involved in reproduction (GO:0003006);; Molecular Function: protein kinase activity (GO:0004672);; Molecular Function: protein tyrosine kinase activity (GO:0004713);; Molecular Function: ATP binding (GO:0005524);; Biological Process: protein phosphorylation (GO:0006468);; Biological Process: signal transduction (GO:0007165);; Cellular Component: chloropla…	--	--	--	--	Protein tyrosine kinase;; Leucine rich repeat;; Protein kinase domain;; Leucine Rich repeats (2 copies);; Leucine Rich Repeat	Probable LRR receptor-like serine/threonine-protein kinase At1g14390 OS=Arabidopsis thaliana OX=3702 GN=At1g14390 PE=2 SV=1	T	Signal transduction mechanisms	PREDICTED: probable LRR receptor-like serine/threonine-protein kinase At1g14390 [Oryza sativa Japonica Group]	+	4	1	23136222
LOC_OS01G60900	--	--	Molecular Function: protein serine/threonine kinase activity (GO:0004674);; Molecular Function: ATP binding (GO:0005524);; Cellular Component: extracellular region (GO:0005576);; Biological Process: protein phosphorylation (GO:0006468);; Cellular Component: chloroplast (GO:0009507);; Biological Process: negative regulation of abscisic acid-activated signaling pathway (GO:0009788);; Biological Pro…	--	--	--	--	Epidermal patterning factor proteins	EPIDERMAL PATTERNING FACTOR-like protein 6 OS=Arabidopsis thaliana OX=3702 GN=EPFL6 PE=1 SV=1	S	Function unknown	PREDICTED: EPIDERMAL PATTERNING FACTOR-like protein 8 isoform X2 [Oryza sativa Japonica Group]	+	4	1	35226562
LOC_OS01G01312	--	--	Biological Process: regionalization (GO:0003002);; Molecular Function: DNA binding (GO:0003677);; Molecular Function: helicase activity (GO:0004386);; Molecular Function: ATP binding (GO:0005524);; Cellular Component: nucleus (GO:0005634);; Cellular Component: endoplasmic reticulum (GO:0005783);; Biological Process: DNA repair (GO:0006281);; Biological Process: chromatin silencing (GO:0006342);; …	K10841|0|osa:4326441|Os01g0102800; K10841 DNA excision repair protein ERCC-6 (A)	ko03420:Nucleotide excision repair	[KL]	--	SNF2 family N-terminal domain;; Helicase conserved C-terminal domain;; Type III restriction enzyme, res subunit	DNA excision repair protein CSB OS=Oryza sativa subsp. japonica OX=39947 GN=CSB PE=2 SV=1	L	Replication, recombination and repair	hypothetical protein OsI_00025 [Oryza sativa Indica Group]	+	3	1	156460
LOC_OS02G42440	--	--	Molecular Function: protein binding (GO:0005515);; Cellular Component: cytosol (GO:0005829);; Cellular Component: chloroplast (GO:0009507);; Biological Process: trichome differentiation (GO:0010026);; Biological Process: regulation of epidermal cell division (GO:0010482);; Biological Process: single-organism transport (GO:0044765);; Biological Process: intracellular transport (GO:0046907);; Biolo…	--	--	--	--	GRAM domain	Putative GEM-like protein 8 OS=Arabidopsis thaliana OX=3702 GN=At5g23370 PE=3 SV=1	S	Function unknown	PREDICTED: putative GEM-like protein 8 [Oryza sativa Japonica Group]	-	12	2	2552768325527700
LOC_OS04G55800	--	--	Biological Process: transition metal ion transport (GO:0000041);; Biological Process: oligopeptide transport (GO:0006857);; Molecular Function: secondary active sulfate transmembrane transporter activity (GO:0008271);; Biological Process: sulfate transport (GO:0008272);; Cellular Component: plasmodesma (GO:0009506);; Cellular Component: chloroplast (GO:0009507);; Biological Process: gravitropism …	K17471|0|osa:4337235|Os04g0652400; K17471 sulfate transporter 3 (A)	--	[P]	Inorganic ion transport and metabolism	Sulfate permease family;; STAS domain	Probable sulfate transporter 3.3 OS=Arabidopsis thaliana OX=3702 GN=SULTR3;3 PE=2 SV=2	P	Inorganic ion transport and metabolism	PREDICTED: probable sulfate transporter 3.3 [Oryza sativa Japonica Group]	-	5	1	33215190
LOC_OS02G46260	--	--	Molecular Function: carboxypeptidase activity (GO:0004180);; Molecular Function: serine-type carboxypeptidase activity (GO:0004185);; Cellular Component: mitochondrion (GO:0005739);; Biological Process: proteolysis (GO:0006508);; Cellular Component: plant-type cell wall (GO:0009505);; Cellular Component: cytoplasmic membrane-bounded vesicle (GO:0016023);; Molecular Function: sinapoyltransferase a…	K16296|0|osa:4330362|Os02g0687900; K16296 serine carboxypeptidase-like clade I [EC:3.4.16.-] (A)	--	[OE]	--	Serine carboxypeptidase	Serine carboxypeptidase-like 19 OS=Arabidopsis thaliana OX=3702 GN=SCPL19 PE=1 SV=1	E	Amino acid transport and metabolism	PREDICTED: serine carboxypeptidase-like 17 [Oryza sativa Japonica Group]	+	28	5	2.82169e+39
LOC_OS03G44620	--	--	Molecular Function: ATP binding (GO:0005524);; Cellular Component: endoplasmic reticulum lumen (GO:0005788);; Cellular Component: Golgi stack (GO:0005795);; Cellular Component: plasma membrane (GO:0005886);; Biological Process: DNA-dependent DNA replication (GO:0006261);; Biological Process: protein folding (GO:0006457);; Molecular Function: cytoskeletal protein binding (GO:0008092);; Biological …	K09503|0|osa:4333580|Os03g0648400; K09503 DnaJ homolog subfamily A member 2 (A)	ko04141:Protein processing in endoplasmic reticulum	[O]	Posttranslational modification, protein turnover, chaperones	DnaJ C terminal domain;; DnaJ domain;; DnaJ central domain	DnaJ protein homolog OS=Cucumis sativus OX=3659 GN=DNAJ1 PE=2 SV=1	O	Posttranslational modification, protein turnover, chaperones	PREDICTED: dnaJ protein homolog [Oryza sativa Japonica Group]	+	66	7	2.51309e+55
LOC_OS03G13300	--	--	Molecular Function: glutamate decarboxylase activity (GO:0004351);; Molecular Function: calmodulin binding (GO:0005516);; Cellular Component: nucleus (GO:0005634);; Cellular Component: cytosol (GO:0005829);; Biological Process: glutamate metabolic process (GO:0006536);; Biological Process: protein targeting to membrane (GO:0006612);; Biological Process: lipid metabolic process (GO:0006629);; Biol…	K01580|0|osa:4332184|Os03g0236200; K01580 glutamate decarboxylase [EC:4.1.1.15] (A)	ko00250:Alanine, aspartate and glutamate metabolism;ko00410:beta-Alanine metabolism;ko00430:Taurine and hypotaurine metabolism;ko00650:Butanoate metabolism	[E]	Amino acid transport and metabolism	Pyridoxal-dependent decarboxylase conserved domain	Glutamate decarboxylase 1 OS=Arabidopsis thaliana OX=3702 GN=GAD1 PE=1 SV=2	E	Amino acid transport and metabolism	PREDICTED: glutamate decarboxylase 1 [Oryza sativa Japonica Group]	+	41	3	7.18404e+20
LOC_OS01G18630	--	--	Molecular Function: actin binding (GO:0003779);; Molecular Function: aspartic-type endopeptidase activity (GO:0004190);; Cellular Component: extracellular region (GO:0005576);; Cellular Component: vacuole (GO:0005773);; Cellular Component: cytosol (GO:0005829);; Biological Process: glycolytic process (GO:0006096);; Biological Process: proteolysis (GO:0006508);; Biological Process: protein targeti…	K08245|0|osa:4325154|Os01g0290000; K08245 phytepsin [EC:3.4.23.40] (A)	--	[O]	Posttranslational modification, protein turnover, chaperones	Eukaryotic aspartyl protease;; Xylanase inhibitor N-terminal;; Saposin-like type B, region 1;; Saposin-like type B, region 2;; Xylanase inhibitor C-terminal	Aspartic proteinase OS=Oryza sativa subsp. japonica OX=39947 GN=RAP PE=2 SV=2	O	Posttranslational modification, protein turnover, chaperones	PREDICTED: aspartic proteinase-like [Oryza sativa Japonica Group]	-	48	6	1.04922e+47
LOC_OS01G62080	--	--	Biological Process: maltose metabolic process (GO:0000023);; Molecular Function: ferrochelatase activity (GO:0004325);; Molecular Function: protein serine/threonine kinase activity (GO:0004674);; Molecular Function: protein tyrosine kinase activity (GO:0004713);; Molecular Function: protein binding (GO:0005515);; Molecular Function: ATP binding (GO:0005524);; Cellular Component: nucleus (GO:00056…	K08287|0|osa:4327372|Os01g0837900; K08287 dual-specificity kinase [EC:2.7.12.1] (A)	--	[T]	Signal transduction mechanisms	Protein kinase domain;; Protein tyrosine kinase	Serine/threonine-protein kinase AFC1 OS=Arabidopsis thaliana OX=3702 GN=AFC1 PE=2 SV=2	T	Signal transduction mechanisms	putative protein kinase (AME2/AFC1) [Oryza sativa Japonica Group]	-	11	1	35925491
LOC_OS07G25420	--	--	Cellular Component: nucleus (GO:0005634);; Cellular Component: cytosol (GO:0005829);; Cellular Component: proteasome regulatory particle (GO:0005838);; Biological Process: fatty acid beta-oxidation (GO:0006635);; Molecular Function: peptidase activity (GO:0008233);; Cellular Component: proteasome regulatory particle, lid subcomplex (GO:0008541);; Biological Process: toxin catabolic process (GO:00…	K03031|0|osa:4343069|Os07g0435100; K03031 26S proteasome regulatory subunit N12 (A)	ko03050:Proteasome	[O]	Posttranslational modification, protein turnover, chaperones	CSN8/PSMD8/EIF3K family	26S proteasome non-ATPase regulatory subunit 8 homolog A OS=Arabidopsis thaliana OX=3702 GN=RPN12A PE=1 SV=1	O	Posttranslational modification, protein turnover, chaperones	PREDICTED: 26S proteasome non-ATPase regulatory subunit 8 homolog A [Oryza sativa Japonica Group]	-	9	3	1.45275e+23
LOC_OS03G25620	--	--	Molecular Function: protein serine/threonine kinase activity (GO:0004674);; Cellular Component: plasma membrane (GO:0005886);; Biological Process: cellular component organization (GO:0016043);; Biological Process: growth (GO:0040007);; Cellular Component: intracellular organelle (GO:0043229);; Biological Process: single-organism cellular process (GO:0044763);; Biological Process: single-organism …	K14798|0|osa:4332942|Os03g0372700; K14798 protein LTV1 (A)	--	[S]	Function unknown	Low temperature viability protein	--	S	Function unknown	PREDICTED: protein LTV1 homolog isoform X1 [Oryza sativa Japonica Group]	+	4	1	14674940
LOC_OS02G17920	--	--	Molecular Function: lactoylglutathione lyase activity (GO:0004462);; Cellular Component: mitochondrion (GO:0005739);; Biological Process: carbohydrate metabolic process (GO:0005975);; Biological Process: response to cold (GO:0009409);; Cellular Component: chloroplast stroma (GO:0009570);; Cellular Component: stromule (GO:0010319);; Biological Process: methylglyoxal catabolic process to D-lactate …	K01759|0|osa:4329021|Os02g0280500; K01759 lactoylglutathione lyase [EC:4.4.1.5] (A)	ko00620:Pyruvate metabolism	[G]	Carbohydrate transport and metabolism	Glyoxalase/Bleomycin resistance protein/Dioxygenase superfamily;; Glyoxalase/Bleomycin resistance protein/Dioxygenase superfamily	Probable lactoylglutathione lyase, chloroplastic OS=Arabidopsis thaliana OX=3702 GN=At1g67280 PE=1 SV=1	E	Amino acid transport and metabolism	hypothetical protein OsI_06754 [Oryza sativa Indica Group]	-	7	1	10378582
LOC_OS02G42590	--	--	Molecular Function: protein binding (GO:0005515);; Cellular Component: nucleolus (GO:0005730);; Cellular Component: plasma membrane (GO:0005886);; Biological Process: regulation of translation (GO:0006417);; Biological Process: signal transduction (GO:0007165);; Biological Process: nucleotide biosynthetic process (GO:0009165);; Biological Process: ribonucleotide metabolic process (GO:0009259);; B…	--	--	[S]	Function unknown	WD domain, G-beta repeat;; Anaphase-promoting complex subunit 4 WD40 domain	COMPASS-like H3K4 histone methylase component WDR5A OS=Arabidopsis thaliana OX=3702 GN=WDR5A PE=1 SV=1	S	Function unknown	PREDICTED: WD repeat-containing protein 44 [Oryza sativa Japonica Group]	+	8	3	2.56245e+23
LOC_OS05G51690	--	--	Molecular Function: sequence-specific DNA binding transcription factor activity (GO:0003700);; Cellular Component: nucleus (GO:0005634);; Biological Process: DNA repair (GO:0006281);; Biological Process: circadian rhythm (GO:0007623);; Molecular Function: zinc ion binding (GO:0008270);; Biological Process: response to wounding (GO:0009611);; Biological Process: response to blue light (GO:0009637)…	--	--	--	--	CCT motif	Zinc finger protein CONSTANS OS=Arabidopsis thaliana OX=3702 GN=CO PE=1 SV=1	S	Function unknown	PREDICTED: uncharacterized protein LOC4339814 [Oryza sativa Japonica Group]	+	4	1	29660282
LOC_OS06G33040	--	--	Molecular Function: DNA binding (GO:0003677);; Molecular Function: transposase activity (GO:0004803);; Biological Process: transposition, DNA-mediated (GO:0006313);; Molecular Function: zinc ion binding (GO:0008270);; Cellular Component: plastid (GO:0009536);;	--	--	--	--	MULE transposase domain;; MuDR family transposase;; Transposase, Mutator family	--	S	Function unknown	RMUA [Oryza sativa Indica Group]	-	4	1	19231220
LOC_OS07G45300	--	--	Cellular Component: mitochondrial inner membrane presequence translocase complex (GO:0005744);; Biological Process: intracellular protein transport (GO:0006886);; Molecular Function: P-P-bond-hydrolysis-driven protein transmembrane transporter activity (GO:0015450);;	--	--	[J]	Translation, ribosomal structure and biogenesis	Tim44-like domain	--	S	Function unknown	hypothetical protein [Oryza sativa Japonica Group]	-	4	1	27029585
LOC_OS03G11590	--	--	Molecular Function: nucleotide-sugar transmembrane transporter activity (GO:0005338);; Cellular Component: Golgi apparatus (GO:0005794);; Cellular Component: plasma membrane (GO:0005886);; Biological Process: organic anion transport (GO:0015711);; Biological Process: nucleotide-sugar transport (GO:0015780);; Cellular Component: integral component of membrane (GO:0016021);; Biological Process: tra…	--	--	[GOU]	--	Triose-phosphate Transporter family	GDP-mannose transporter GONST3 OS=Arabidopsis thaliana OX=3702 GN=GONST3 PE=2 SV=1	U	Intracellular trafficking, secretion, and vesicular transport	PREDICTED: GDP-mannose transporter GONST3 isoform X1 [Oryza sativa Japonica Group]	-	6	1	6013257
LOC_OS02G52230	--	--	Biological Process: polysaccharide biosynthetic process (GO:0000271);; Biological Process: RNA splicing, via endonucleolytic cleavage and ligation (GO:0000394);; Biological Process: response to molecule of bacterial origin (GO:0002237);; Molecular Function: ubiquitin-protein transferase activity (GO:0004842);; Molecular Function: structural constituent of cell wall (GO:0005199);; Molecular Functi…	--	--	[R]	General function prediction only	--	F-box protein FBX14 OS=Arabidopsis thaliana OX=3702 GN=FBX14 PE=2 SV=1	S	Function unknown	PREDICTED: transport inhibitor response 1-like protein isoform X1 [Oryza sativa Japonica Group]	+	10	3	3.19889e+23
LOC_OS08G40530	--	--	Biological Process: respiratory burst involved in defense response (GO:0002679);; Molecular Function: calcium-transporting ATPase activity (GO:0005388);; Molecular Function: calmodulin binding (GO:0005516);; Molecular Function: ATP binding (GO:0005524);; Cellular Component: endoplasmic reticulum membrane (GO:0005789);; Cellular Component: Golgi apparatus (GO:0005794);; Cellular Component: plasma …	--	--	[P]	Inorganic ion transport and metabolism	Cation transporting ATPase, C-terminus;; haloacid dehalogenase-like hydrolase;; Cation transport ATPase (P-type);; haloacid dehalogenase-like hydrolase	Calcium-transporting ATPase 5, plasma membrane-type OS=Oryza sativa subsp. japonica OX=39947 GN=ACA5 PE=1 SV=2	P	Inorganic ion transport and metabolism	PREDICTED: calcium-transporting ATPase 8, plasma membrane-type [Oryza sativa Japonica Group]	-	7	1	25652874
LOC_OS03G25130	--	--	Cellular Component: nuclear chromosome, telomeric region (GO:0000784);; Molecular Function: nucleic acid binding (GO:0003676);; Molecular Function: protein binding (GO:0005515);; Biological Process: regulation of transcription, DNA-templated (GO:0006355);; Biological Process: telomere capping (GO:0016233);; Biological Process: post-translational protein modification (GO:0043687);; Biological Proc…	--	--	[L]	Replication, recombination and repair	OB-fold nucleic acid binding domain	CST complex subunit STN1 OS=Arabidopsis thaliana OX=3702 GN=STN1 PE=1 SV=1	S	Function unknown	PREDICTED: CST complex subunit STN1 [Oryza sativa Japonica Group]	-	3	1	14354500
LOC_OS06G07580	--	--	Biological Process: RNA methylation (GO:0001510);; Molecular Function: structural constituent of ribosome (GO:0003735);; Cellular Component: nucleolus (GO:0005730);; Cellular Component: mitochondrion (GO:0005739);; Biological Process: translation (GO:0006412);; Cellular Component: cytosolic small ribosomal subunit (GO:0022627);;	--	--	[JO]	--	Ribosomal protein S30	40S ribosomal protein S30 OS=Arabidopsis thaliana OX=3702 GN=RPS30A PE=3 SV=3	J	Translation, ribosomal structure and biogenesis	PREDICTED: 40S ribosomal protein S30 [Beta vulgaris subsp. vulgaris]	+	7	2	36570253657055
LOC_OS01G04950	--	--	Molecular Function: protein binding (GO:0005515);; Cellular Component: Golgi apparatus (GO:0005794);; Cellular Component: plasma membrane (GO:0005886);; Biological Process: polysaccharide metabolic process (GO:0005976);; Biological Process: nitrogen compound metabolic process (GO:0006807);; Biological Process: lipid transport (GO:0006869);; Biological Process: intra-Golgi vesicle-mediated transpo…	--	--	[E]	Amino acid transport and metabolism	POT family;; Major Facilitator Superfamily	Protein NRT1/ PTR FAMILY 8.1 OS=Arabidopsis thaliana OX=3702 GN=NPF8.1 PE=1 SV=1	E	Amino acid transport and metabolism	PREDICTED: protein NRT1/ PTR FAMILY 8.2 isoform X2 [Oryza sativa Japonica Group]	+	14	3	2.29811e+20
LOC_OS08G21350	--	--	Biological Process: nuclear-transcribed mRNA catabolic process, nonsense-mediated decay (GO:0000184);; Cellular Component: cytoplasmic mRNA processing body (GO:0000932);; Biological Process: spindle assembly involved in meiosis (GO:0090306);;	K14409|0|osa:4345227|Os08g0305300; K14409 protein SMG7 (A)	ko03015:mRNA surveillance pathway	[A]	RNA processing and modification	Est1 DNA/RNA binding domain;; Telomerase activating protein Est1	Protein SMG7 OS=Arabidopsis thaliana OX=3702 GN=SMG7 PE=2 SV=1	S	Function unknown	PREDICTED: protein SMG7 isoform X1 [Oryza sativa Japonica Group]	-	3	1	12724304
LOC_OS01G70770	--	--	Molecular Function: glutathione transferase activity (GO:0004364);; Molecular Function: glutathione peroxidase activity (GO:0004602);; Molecular Function: copper ion binding (GO:0005507);; Cellular Component: vacuole (GO:0005773);; Cellular Component: cytosol (GO:0005829);; Cellular Component: plasma membrane (GO:0005886);; Biological Process: pentose-phosphate shunt (GO:0006098);; Biological Pro…	K00799|1.34882e-151|osa:4326828|Os01g0933900; K00799 glutathione S-transferase [EC:2.5.1.18] (A)	ko00480:Glutathione metabolism	[O]	Posttranslational modification, protein turnover, chaperones	Glutathione S-transferase, N-terminal domain;; Glutathione S-transferase, N-terminal domain;; Glutathione S-transferase, C-terminal domain;; Glutathione S-transferase, N-terminal domain;; Glutathione S-transferase, C-terminal domain;; Glutathione S-transferase, C-terminal domain	Glutathione S-transferase 3 OS=Zea mays OX=4577 GN=GST3 PE=1 SV=4	O	Posttranslational modification, protein turnover, chaperones	PREDICTED: glutathione S-transferase 3 [Oryza sativa Japonica Group]	-	10	1	40962723
LOC_OS03G55090	--	--	Cellular Component: cytosol (GO:0005829);; Molecular Function: glycogen phosphorylase activity (GO:0008184);; Biological Process: response to cold (GO:0009409);; Biological Process: response to water deprivation (GO:0009414);; Cellular Component: amyloplast (GO:0009501);; Cellular Component: chloroplast stroma (GO:0009570);; Biological Process: starch biosynthetic process (GO:0019252);; Molecular…	K00688|0|osa:4334171|Os03g0758100; K00688 starch phosphorylase [EC:2.4.1.1] (A)	ko00500:Starch and sucrose metabolism	[G]	Carbohydrate transport and metabolism	Carbohydrate phosphorylase	Alpha-1,4 glucan phosphorylase L-2 isozyme, chloroplastic/amyloplastic OS=Solanum tuberosum OX=4113 GN=STP-1 PE=1 SV=1	G	Carbohydrate transport and metabolism	starch phosphorylase, partial [Oryza sativa Japonica Group]	-	7	2	3133206931335310
LOC_OS11G24610	--	--	Molecular Function: structural constituent of ribosome (GO:0003735);; Biological Process: translation (GO:0006412);; Cellular Component: cytosolic large ribosomal subunit (GO:0022625);; Biological Process: ribosome biogenesis (GO:0042254);;	K02923|2.0468e-38|osa:4350406|Os11g0433900; K02923 large subunit ribosomal protein L38e (A)	ko03010:Ribosome	[J]	Translation, ribosomal structure and biogenesis	Ribosomal L38e protein family	60S ribosomal protein L38 OS=Arabidopsis thaliana OX=3702 GN=RPL38A PE=3 SV=1	J	Translation, ribosomal structure and biogenesis	PREDICTED: 60S ribosomal protein L38 [Oryza sativa Japonica Group]	+	11	4	1.40456e+31
LOC_OS11G43590	--	--	Cellular Component: mitochondrion (GO:0005739);; Cellular Component: cytosol (GO:0005829);; Biological Process: DNA metabolic process (GO:0006259);; Biological Process: cellular protein modification process (GO:0006464);; Biological Process: response to light stimulus (GO:0009416);; Biological Process: response to hormone (GO:0009725);; Biological Process: gene silencing (GO:0016458);; Molecular …	--	--	[R]	General function prediction only	Galactose oxidase, central domain;; Kelch motif;; Kelch motif;; Kelch motif;; Galactose oxidase, central domain;; Kelch motif	Acyl-CoA-binding domain-containing protein 6 OS=Oryza sativa subsp. japonica OX=39947 GN=ACBP6 PE=2 SV=1	S	Function unknown	Kelch motif family protein, expressed [Oryza sativa Japonica Group]	+	3	1	26305709
LOC_OS01G73470	--	--	Molecular Function: nucleotide binding (GO:0000166);;	--	--	[S]	Function unknown	--	--	S	Function unknown	PREDICTED: coiled-coil domain-containing protein R3HCC1L [Oryza sativa Japonica Group]	-	15	3	4.25749e+23
LOC_OS05G14194	--	--	Molecular Function: lactoylglutathione lyase activity (GO:0004462);; Molecular Function: protein serine/threonine kinase activity (GO:0004674);; Molecular Function: ATP binding (GO:0005524);; Cellular Component: mitochondrion (GO:0005739);; Biological Process: carbohydrate metabolic process (GO:0005975);; Biological Process: protein phosphorylation (GO:0006468);; Biological Process: response to c…	K01759|0|osa:4338161|Os05g0230900; K01759 lactoylglutathione lyase [EC:4.4.1.5] (A)	ko00620:Pyruvate metabolism	[G]	Carbohydrate transport and metabolism	Glyoxalase/Bleomycin resistance protein/Dioxygenase superfamily;; Glyoxalase/Bleomycin resistance protein/Dioxygenase superfamily	Probable lactoylglutathione lyase, chloroplastic OS=Arabidopsis thaliana OX=3702 GN=At1g67280 PE=1 SV=1	E	Amino acid transport and metabolism	PREDICTED: probable lactoylglutathione lyase, chloroplastic [Oryza sativa Japonica Group]	-	4	1	7960436
LOC_OS04G10350	--	--	Biological Process: transition metal ion transport (GO:0000041);; Cellular Component: cytosol (GO:0005829);; Biological Process: toxin catabolic process (GO:0009407);; Biological Process: response to water deprivation (GO:0009414);; Cellular Component: plasmodesma (GO:0009506);; Cellular Component: plastid (GO:0009536);; Biological Process: response to wounding (GO:0009611);; Biological Process: …	--	--	[QR]	--	2OG-Fe(II) oxygenase superfamily;; non-haem dioxygenase in morphine synthesis N-terminal	1-aminocyclopropane-1-carboxylate oxidase homolog 3 OS=Arabidopsis thaliana OX=3702 GN=At1g06650 PE=2 SV=1	S	Function unknown	PREDICTED: 1-aminocyclopropane-1-carboxylate oxidase homolog 1 [Oryza sativa Japonica Group]	+	4	1	5592696
LOC_OS02G37880	--	--	Molecular Function: protein serine/threonine kinase activity (GO:0004674);; Molecular Function: binding (GO:0005488);; Molecular Function: ATP binding (GO:0005524);; Biological Process: protein phosphorylation (GO:0006468);; Biological Process: defense response (GO:0006952);; Biological Process: signal transduction (GO:0007165);; Biological Process: response to fungus (GO:0009620);; Biological Pr…	--	--	[T]	Signal transduction mechanisms	Protein kinase domain;; Protein tyrosine kinase	CBL-interacting protein kinase 22 OS=Oryza sativa subsp. japonica OX=39947 GN=CIPK22 PE=2 SV=1	T	Signal transduction mechanisms	PREDICTED: probable serine/threonine-protein kinase DDB_G0276461 [Oryza sativa Japonica Group]	+	5	2	2289724222897260
LOC_OS02G55340	--	--	Biological Process: response to superoxide (GO:0000303);; Molecular Function: protein serine/threonine kinase activity (GO:0004674);; Molecular Function: binding (GO:0005488);; Molecular Function: ATP binding (GO:0005524);; Cellular Component: cytoplasm (GO:0005737);; Biological Process: protein phosphorylation (GO:0006468);; Biological Process: fatty acid beta-oxidation (GO:0006635);; Biological…	--	--	[T]	Signal transduction mechanisms	Protein kinase domain;; WD domain, G-beta repeat;; HEAT repeat;; Protein tyrosine kinase	Serine/threonine-protein kinase VPS15 OS=Arabidopsis thaliana OX=3702 GN=VPS15 PE=1 SV=1	T	Signal transduction mechanisms	protein kinase-like [Oryza sativa Japonica Group]	-	2	1	33885847
LOC_OS11G06410	--	--	Molecular Function: chromatin binding (GO:0003682);; Cellular Component: cytoplasmic membrane-bounded vesicle (GO:0016023);;	--	--	--	--	Myb/SANT-like DNA-binding domain	--	S	Function unknown	PREDICTED: uncharacterized protein LOC4349866 isoform X1 [Oryza sativa Japonica Group]	+	3	1	3094034
LOC_OS01G13150	--	--	Biological Process: tRNA 3'-trailer cleavage (GO:0042779);; Molecular Function: 3'-tRNA processing endoribonuclease activity (GO:0042781);;	K00784|0|osa:4324278|Os01g0232300; K00784 ribonuclease Z [EC:3.1.26.11] (A)	ko03013:RNA transport	[R]	General function prediction only	tRNase Z endonuclease;; Beta-lactamase superfamily domain	tRNAse Z TRZ4, mitochondrial OS=Arabidopsis thaliana OX=3702 GN=TRZ4 PE=2 SV=1	S	Function unknown	PREDICTED: uncharacterized protein LOC4324278 [Oryza sativa Japonica Group]	+	4	1	7332216
LOC_OS01G43020	--	--	Molecular Function: CTP synthase activity (GO:0003883);; Biological Process: pyrimidine nucleotide biosynthetic process (GO:0006221);;	K01937|0|osa:4326656|Os01g0616900; K01937 CTP synthase [EC:6.3.4.2] (A)	ko00240:Pyrimidine metabolism	[F]	Nucleotide transport and metabolism	CTP synthase N-terminus;; Glutamine amidotransferase class-I;; Peptidase C26	--	F	Nucleotide transport and metabolism	PREDICTED: CTP synthase isoform X1 [Oryza sativa Japonica Group]	-	22	3	2.44989e+23
LOC_OS01G59060	--	--	Biological Process: defense response to insect (GO:0002213);; Molecular Function: structural constituent of ribosome (GO:0003735);; Molecular Function: chitinase activity (GO:0004568);; Molecular Function: structural molecule activity (GO:0005198);; Molecular Function: protein binding (GO:0005515);; Cellular Component: extracellular region (GO:0005576);; Cellular Component: ribosome (GO:0005840);…	K02914|5.61636e-62|osa:4327541|Os01g0805000; K02914 large subunit ribosomal protein L34 (A)	ko03010:Ribosome	--	--	Ribosomal protein L34	50S ribosomal protein L34, chloroplastic OS=Spinacia oleracea OX=3562 GN=RPL34 PE=1 SV=1	J	Translation, ribosomal structure and biogenesis	PREDICTED: 50S ribosomal protein L34, chloroplastic [Oryza sativa Japonica Group]	-	5	1	34133820
LOC_OS09G28570	--	--	Molecular Function: nucleotide binding (GO:0000166);; Cellular Component: mitochondrion (GO:0005739);; Cellular Component: peroxisome (GO:0005777);; Biological Process: fatty acid beta-oxidation (GO:0006635);; Biological Process: response to stress (GO:0006950);; Biological Process: response to oxidative stress (GO:0006979);; Molecular Function: zinc ion binding (GO:0008270);; Cellular Component:…	K07119|0|osa:4347279|Os09g0459800; K07119 (A)	--	[R]	General function prediction only	short chain dehydrogenase;; Enoyl-(Acyl carrier protein) reductase;; Zinc-binding dehydrogenase;; Zinc-binding dehydrogenase;; Alcohol dehydrogenase GroES-like domain;; KR domain	2-alkenal reductase (NADP(+)-dependent) OS=Nicotiana tabacum OX=4097 GN=DBR PE=1 SV=1	S	Function unknown	PREDICTED: zinc-binding alcohol dehydrogenase domain-containing protein 2 [Oryza sativa Japonica Group]	+	9	2	1738869917388860
LOC_OS05G44760	--	--	Molecular Function: glucokinase activity (GO:0004340);; Molecular Function: protein binding (GO:0005515);; Molecular Function: ATP binding (GO:0005524);; Cellular Component: nucleus (GO:0005634);; Cellular Component: mitochondrion (GO:0005739);; Cellular Component: vacuole (GO:0005773);; Cellular Component: plasma membrane (GO:0005886);; Biological Process: glycolytic process (GO:0006096);; Molec…	K00844|0|osa:4339361|Os05g0522500; K00844 hexokinase [EC:2.7.1.1] (A)	ko00010:Glycolysis / Gluconeogenesis;ko00051:Fructose and mannose metabolism;ko00052:Galactose metabolism;ko00500:Starch and sucrose metabolism;ko00520:Amino sugar and nucleotide sugar metabolism;ko01200:Carbon metabolism	[G]	Carbohydrate transport and metabolism	Hexokinase;; Hexokinase	Hexokinase-5 OS=Oryza sativa subsp. japonica OX=39947 GN=HXK5 PE=2 SV=1	G	Carbohydrate transport and metabolism	PREDICTED: hexokinase-5 [Oryza sativa Japonica Group]	+	4	1	26022256
LOC_OS01G04930	--	--	Molecular Function: DNA binding (GO:0003677);; Molecular Function: chromatin binding (GO:0003682);; Cellular Component: nucleus (GO:0005634);; Cellular Component: cytosol (GO:0005829);; Biological Process: regulation of transcription, DNA-templated (GO:0006355);; Biological Process: gravitropism (GO:0009630);; Biological Process: response to salt stress (GO:0009651);; Biological Process: response…	--	--	[O]	Posttranslational modification, protein turnover, chaperones	Myb-like DNA-binding domain;; Myb-like DNA-binding domain	Transcription factor DIVARICATA OS=Antirrhinum majus OX=4151 GN=DIVARICATA PE=2 SV=1	K	Transcription	PREDICTED: transcription factor DIVARICATA [Oryza sativa Japonica Group]	-	5	1	2282009
LOC_OS03G20860	--	--	Cellular Component: mitochondrion (GO:0005739);; Cellular Component: plastid (GO:0009536);;	--	--	--	--	--	--	S	Function unknown	PREDICTED: uncharacterized protein LOC4332700 [Oryza sativa Japonica Group]	-	5	2	1180846111808540
LOC_OS01G56150	--	--	Biological Process: RNA splicing, via endonucleolytic cleavage and ligation (GO:0000394);; Molecular Function: carboxypeptidase activity (GO:0004180);; Cellular Component: vacuole (GO:0005773);; Biological Process: proteolysis (GO:0006508);; Molecular Function: serine-type peptidase activity (GO:0008236);; Biological Process: methionine biosynthetic process (GO:0009086);; Cellular Component: chlo…	K01285|0|osa:4325498|Os01g0767100; K01285 lysosomal Pro-X carboxypeptidase [EC:3.4.16.2] (A)	--	[OR]	--	Serine carboxypeptidase S28	Probable serine protease EDA2 OS=Arabidopsis thaliana OX=3702 GN=EDA2 PE=2 SV=2	S	Function unknown	PREDICTED: lysosomal Pro-X carboxypeptidase [Oryza sativa Japonica Group]	-	4	1	32334681
LOC_OS03G42760	--	--	Biological Process: fatty acid beta-oxidation (GO:0006635);; Molecular Function: zinc ion binding (GO:0008270);; Biological Process: hormone-mediated signaling pathway (GO:0009755);; Biological Process: protein import into peroxisome matrix (GO:0016558);; Cellular Component: intracellular part (GO:0044424);;	K11968|0|osa:4333494|Os03g0625800; K11968 ariadne-1 (A)	--	[O]	Posttranslational modification, protein turnover, chaperones	IBR domain, a half RING-finger domain	Probable E3 ubiquitin-protein ligase ARI1 OS=Arabidopsis thaliana OX=3702 GN=ARI1 PE=2 SV=1	O	Posttranslational modification, protein turnover, chaperones	PREDICTED: probable E3 ubiquitin-protein ligase ARI1 [Oryza sativa Japonica Group]	+	9	1	23816482
LOC_OS10G29274	--	--	Biological Process: polysaccharide biosynthetic process (GO:0000271);; Biological Process: polysaccharide catabolic process (GO:0000272);; Molecular Function: aspartic-type endopeptidase activity (GO:0004190);; Molecular Function: protein serine/threonine kinase activity (GO:0004674);; Molecular Function: ATP binding (GO:0005524);; Cellular Component: extracellular region (GO:0005576);; Cellular …	--	--	--	--	Eukaryotic aspartyl protease;; Leucine rich repeat N-terminal domain	Aspartic proteinase oryzasin-1 OS=Oryza sativa subsp. japonica OX=39947 GN=Os05g0567100 PE=2 SV=2	--	--	expressed protein [Oryza sativa Japonica Group]	-	2	1	15229477
LOC_OS04G43040	--	--	--	--	--	--	--	--	--	S	Function unknown	PREDICTED: coiled-coil domain-containing protein 115 isoform X1 [Oryza sativa Japonica Group]	-	7	2	2546869825468670
LOC_OS08G42470	--	--	Molecular Function: DNA binding (GO:0003677);; Molecular Function: sequence-specific DNA binding transcription factor activity (GO:0003700);; Cellular Component: nucleus (GO:0005634);; Biological Process: regulation of transcription, DNA-templated (GO:0006355);; Biological Process: fatty acid catabolic process (GO:0009062);; Biological Process: jasmonic acid metabolic process (GO:0009694);; Biolo…	--	--	--	--	Helix-loop-helix DNA-binding domain	Transcription factor bHLH137 OS=Arabidopsis thaliana OX=3702 GN=BHLH137 PE=1 SV=1	K	Transcription	PREDICTED: transcription factor bHLH137 [Oryza sativa Japonica Group]	-	6	2	2684106526840990
LOC_OS06G21600	--	--	Biological Process: defense response to insect (GO:0002213);; Molecular Function: chitinase activity (GO:0004568);; Cellular Component: extracellular region (GO:0005576);; Biological Process: chitin catabolic process (GO:0006032);; Cellular Component: chloroplast stroma (GO:0009570);; Biological Process: cellular component organization (GO:0016043);; Molecular Function: kinase activity (GO:001630…	--	--	[S]	Function unknown	Uncharacterized ACR, YdiU/UPF0061 family	--	S	Function unknown	PREDICTED: UPF0061 protein AZOSEA38000 [Oryza sativa Japonica Group]	-	4	1	12456905
LOC_OS09G31430	--	--	Molecular Function: glucan exo-1,3-beta-glucosidase activity (GO:0004338);; Molecular Function: beta-galactosidase activity (GO:0004565);; Cellular Component: extracellular region (GO:0005576);; Cellular Component: mitochondrion (GO:0005739);; Cellular Component: Golgi apparatus (GO:0005794);; Cellular Component: cytosol (GO:0005829);; Biological Process: carbohydrate metabolic process (GO:000597…	K01188|0|osa:4347441|Os09g0491100; K01188 beta-glucosidase [EC:3.2.1.21] (A)	ko00460:Cyanoamino acid metabolism;ko00500:Starch and sucrose metabolism;ko00940:Phenylpropanoid biosynthesis	[G]	Carbohydrate transport and metabolism	Glycosyl hydrolase family 1	Beta-glucosidase 30 OS=Oryza sativa subsp. japonica OX=39947 GN=BGLU30 PE=2 SV=1	G	Carbohydrate transport and metabolism	PREDICTED: beta-glucosidase 30 isoform X1 [Oryza sativa Japonica Group]	-	17	2	1890537018905350
LOC_OS03G58040	--	--	Molecular Function: aldo-keto reductase (NADP) activity (GO:0004033);; Molecular Function: glutamate dehydrogenase (NAD+) activity (GO:0004352);; Molecular Function: glutamate dehydrogenase [NAD(P)+] activity (GO:0004353);; Molecular Function: copper ion binding (GO:0005507);; Molecular Function: ATP binding (GO:0005524);; Cellular Component: mitochondrion (GO:0005739);; Cellular Component: mitoc…	K00261|0|osa:4334405|Os03g0794500; K00261 glutamate dehydrogenase (NAD(P)+) [EC:1.4.1.3] (A)	ko00250:Alanine, aspartate and glutamate metabolism;ko00330:Arginine and proline metabolism;ko00910:Nitrogen metabolism	[E]	Amino acid transport and metabolism	Glutamate/Leucine/Phenylalanine/Valine dehydrogenase;; Glu/Leu/Phe/Val dehydrogenase, dimerisation domain	Glutamate dehydrogenase 1, mitochondrial OS=Oryza sativa subsp. japonica OX=39947 GN=GDH1 PE=2 SV=1	E	Amino acid transport and metabolism	PREDICTED: glutamate dehydrogenase [Oryza sativa Japonica Group]	-	17	1	33038058
LOC_OS01G27520	--	--	Molecular Function: nucleic acid binding (GO:0003676);; Molecular Function: asparagine-tRNA ligase activity (GO:0004816);; Molecular Function: ATP binding (GO:0005524);; Cellular Component: mitochondrion (GO:0005739);; Cellular Component: cytosol (GO:0005829);; Biological Process: asparaginyl-tRNA aminoacylation (GO:0006421);; Cellular Component: chloroplast (GO:0009507);; Biological Process: emb…	K01893|0|osa:4325717|Os01g0372700; K01893 asparaginyl-tRNA synthetase [EC:6.1.1.22] (A)	ko00970:Aminoacyl-tRNA biosynthesis	[J]	Translation, ribosomal structure and biogenesis	tRNA synthetases class II (D, K and N);; OB-fold nucleic acid binding domain;; WHEP-TRS domain	Asparagine--tRNA ligase, cytoplasmic 3 OS=Arabidopsis thaliana OX=3702 GN=SYNC3 PE=1 SV=1	J	Translation, ribosomal structure and biogenesis	PREDICTED: asparagine--tRNA ligase, cytoplasmic 3 [Oryza sativa Japonica Group]	-	10	3	1.53568e+23
LOC_OS06G50154	--	--	Cellular Component: endoplasmic reticulum (GO:0005783);; Cellular Component: cytoplasmic membrane-bounded vesicle (GO:0016023);;	K13249|5.04285e-166|osa:4342072|Os06g0715500; K13249 translocon-associated protein subunit alpha (A)	ko04141:Protein processing in endoplasmic reticulum	[U]	Intracellular trafficking, secretion, and vesicular transport	Translocon-associated protein (TRAP), alpha subunit	Translocon-associated protein subunit alpha OS=Arabidopsis thaliana OX=3702 GN=At2g21160 PE=2 SV=3	U	Intracellular trafficking, secretion, and vesicular transport	PREDICTED: translocon-associated protein subunit alpha [Oryza sativa Japonica Group]	+	27	5	3.03745e+39
LOC_OS09G36920	--	--	Cellular Component: plastid (GO:0009536);; Cellular Component: intracellular membrane-bounded organelle (GO:0043231);; Cellular Component: cytoplasmic part (GO:0044444);;	--	--	[OJ]	--	La domain	La-related protein 1B OS=Arabidopsis thaliana OX=3702 GN=LARP1B PE=1 SV=2	JO	--	PREDICTED: la-related protein 1B [Oryza sativa Japonica Group]	-	4	1	21300057
LOC_OS03G60090	--	--	Molecular Function: methylenetetrahydrofolate reductase (NAD(P)H) activity (GO:0004489);; Cellular Component: cytosol (GO:0005829);; Biological Process: methionine metabolic process (GO:0006555);; Biological Process: tetrahydrofolate interconversion (GO:0035999);; Biological Process: oxidation-reduction process (GO:0055114);;	K00297|0|osa:4334554|Os03g0815200; K00297 methylenetetrahydrofolate reductase (NADPH) [EC:1.5.1.20] (A)	ko00670:One carbon pool by folate;ko01200:Carbon metabolism	[E]	Amino acid transport and metabolism	Methylenetetrahydrofolate reductase	Probable methylenetetrahydrofolate reductase OS=Oryza sativa subsp. japonica OX=39947 GN=Os03g0815200 PE=2 SV=1	E	Amino acid transport and metabolism	PREDICTED: probable methylenetetrahydrofolate reductase [Oryza sativa Japonica Group]	-	54	3	3.41679e+23
LOC_OS02G14059	--	--	Molecular Function: structural constituent of ribosome (GO:0003735);; Cellular Component: ribosome (GO:0005840);; Biological Process: translation (GO:0006412);; Molecular Function: rRNA binding (GO:0019843);; Cellular Component: cytosolic ribosome (GO:0022626);; Cellular Component: chloroplast part (GO:0044434);;	K02868|5.83934e-118|osa:4328826|Os02g0235600; K02868 large subunit ribosomal protein L11e (A)	ko03010:Ribosome	[J]	Translation, ribosomal structure and biogenesis	ribosomal L5P family C-terminus;; Ribosomal protein L5	60S ribosomal protein L11 OS=Oryza sativa subsp. japonica OX=39947 GN=RPL11 PE=2 SV=1	J	Translation, ribosomal structure and biogenesis	PREDICTED: 60S ribosomal protein L11-like [Oryza sativa Japonica Group]	+	5	1	7687443
LOC_OS01G19800	--	--	Molecular Function: zinc ion binding (GO:0008270);;	--	--	[A]	RNA processing and modification	Protein of unknown function (DUF3675);; RING-variant domain	Probable E3 ubiquitin ligase SUD1 OS=Arabidopsis thaliana OX=3702 GN=SUD1 PE=1 SV=1	O	Posttranslational modification, protein turnover, chaperones	PREDICTED: uncharacterized protein LOC4323902 [Oryza sativa Japonica Group]	-	10	2	1123197411232030
LOC_OS03G62700	--	--	Molecular Function: protein serine/threonine kinase activity (GO:0004674);; Molecular Function: protein tyrosine kinase activity (GO:0004713);; Molecular Function: ATP binding (GO:0005524);; Cellular Component: nucleus (GO:0005634);; Cellular Component: cytoplasm (GO:0005737);; Cellular Component: plasma membrane (GO:0005886);; Biological Process: protein phosphorylation (GO:0006468);; Biological…	--	--	[T]	Signal transduction mechanisms	Protein tyrosine kinase;; Protein kinase domain	PTI1-like tyrosine-protein kinase 3 OS=Arabidopsis thaliana OX=3702 GN=PTI13 PE=1 SV=1	T	Signal transduction mechanisms	PREDICTED: PTI1-like tyrosine-protein kinase 1 [Oryza sativa Japonica Group]	-	13	1	35480700
LOC_OS02G39180	--	--	--	--	--	--	--	--	--	S	Function unknown	PREDICTED: uncharacterized protein LOC4329913 [Oryza sativa Japonica Group]	+	3	1	23667104
LOC_OS02G08100	--	--	Biological Process: long-chain fatty acid metabolic process (GO:0001676);; Molecular Function: long-chain fatty acid-CoA ligase activity (GO:0004467);; Molecular Function: ATP binding (GO:0005524);; Cellular Component: nucleus (GO:0005634);; Cellular Component: cytoplasm (GO:0005737);; Biological Process: polyamine catabolic process (GO:0006598);; Biological Process: protein targeting to membrane…	K01904|0|dosa:Os02t0177600-01|Os02g0177600; Similar to 4-coumarate--CoA ligase 1 (EC 6.2.1.12) (4CL 1) (4-coumaroyl-CoA synthase 1) (Clone 4CL14) (Fragment).; K01904 4-coumarate--CoA ligase [EC:6.2.1.12] (A)	ko00130:Ubiquinone and other terpenoid-quinone biosynthesis;ko00360:Phenylalanine metabolism;ko00940:Phenylpropanoid biosynthesis	[I]	Lipid transport and metabolism	AMP-binding enzyme;; AMP-binding enzyme C-terminal domain	Probable 4-coumarate--CoA ligase 3 OS=Oryza sativa subsp. japonica OX=39947 GN=4CL3 PE=2 SV=1	IQ	--	Os02g0177600, partial [Oryza sativa Japonica Group]	+	54	3	4.28591e+20
LOC_OS12G44310	--	--	Cellular Component: vacuolar membrane (GO:0005774);; Cellular Component: Golgi apparatus (GO:0005794);; Cellular Component: plasma membrane (GO:0005886);; Biological Process: pentose-phosphate shunt (GO:0006098);; Biological Process: unsaturated fatty acid biosynthetic process (GO:0006636);; Biological Process: phosphatidylglycerol biosynthetic process (GO:0006655);; Biological Process: response …	K11159|0|osa:4352923|Os12g0640600; K11159 carotenoid cleavage dioxygenase (A)	--	[Q]	Secondary metabolites biosynthesis, transport and catabolism	Retinal pigment epithelial membrane protein	Carotenoid 9,10(9&apos;,10&apos;)-cleavage dioxygenase OS=Crocus sativus OX=82528 GN=CCD PE=1 SV=1	Q	Secondary metabolites biosynthesis, transport and catabolism	9,10-9&apos;,10&apos; carotenoid cleavage dioxygenase 1, putative, expressed [Oryza sativa Japonica Group]	+	10	1	27471665
LOC_OS01G71220	--	--	Cellular Component: cell periphery (GO:0071944);;	--	--	[O]	Posttranslational modification, protein turnover, chaperones	--	--	O	Posttranslational modification, protein turnover, chaperones	PREDICTED: uncharacterized protein LOC4326504 [Oryza sativa Japonica Group]	-	5	2	4120385241203940
LOC_OS06G44150	--	--	Cellular Component: vacuole (GO:0005773);; Cellular Component: plasma membrane (GO:0005886);; Cellular Component: plastid (GO:0009536);; Molecular Function: magnesium ion transmembrane transporter activity (GO:0015095);; Biological Process: magnesium ion transport (GO:0015693);; Cellular Component: integral component of membrane (GO:0016021);; Biological Process: response to stimulus (GO:0050896)…	K16075|0|osa:4341687|Os06g0650800; K16075 magnesium transporter (A)	--	[P]	Inorganic ion transport and metabolism	CorA-like Mg2+ transporter protein	Magnesium transporter MRS2-B OS=Oryza sativa subsp. japonica OX=39947 GN=MRS2-B PE=2 SV=1	U	Intracellular trafficking, secretion, and vesicular transport	PREDICTED: magnesium transporter MRS2-B [Oryza sativa Japonica Group]	-	4	1	26635651
LOC_OS01G32870	--	--	Cellular Component: nucleus (GO:0005634);; Cellular Component: endoplasmic reticulum lumen (GO:0005788);; Cellular Component: Golgi stack (GO:0005795);; Cellular Component: plasma membrane (GO:0005886);; Biological Process: protein folding (GO:0006457);; Molecular Function: cytoskeletal protein binding (GO:0008092);; Cellular Component: plasmodesma (GO:0009506);; Biological Process: systemic acqu…	--	--	[O]	Posttranslational modification, protein turnover, chaperones	DnaJ domain	Chaperone protein dnaJ 15 OS=Arabidopsis thaliana OX=3702 GN=ATJ15 PE=1 SV=1	O	Posttranslational modification, protein turnover, chaperones	PREDICTED: chaperone protein dnaJ 15 [Oryza sativa Japonica Group]	+	5	1	18050079
LOC_OS01G52400	--	--	Cellular Component: mitochondrion (GO:0005739);; Molecular Function: acyl-[acyl-carrier-protein]-UDP-N-acetylglucosamine O-acyltransferase activity (GO:0008780);; Biological Process: dolichol biosynthetic process (GO:0019408);; Biological Process: lipid X metabolic process (GO:2001289);;	K00677|0|osa:4324662|Os01g0722100; K00677 UDP-N-acetylglucosamine acyltransferase [EC:2.3.1.129] (A)	--	--	--	Bacterial transferase hexapeptide (six repeats);; Udp N-acetylglucosamine O-acyltransferase; Domain 2	Probable acyl-[acyl-carrier-protein]--UDP-N-acetylglucosamine O-acyltransferase, mitochondrial OS=Arabidopsis thaliana OX=3702 GN=LPXA PE=1 SV=1	M	Cell wall/membrane/envelope biogenesis	PREDICTED: probable acyl-[acyl-carrier-protein]--UDP-N-acetylglucosamine O-acyltransferase, mitochondrial isoform X1 [Oryza sativa Japonica Group]	+	6	2	3010733930107370
LOC_OS07G30970	--	--	Molecular Function: nucleoside diphosphate kinase activity (GO:0004550);; Molecular Function: ATP binding (GO:0005524);; Cellular Component: mitochondrial inner membrane (GO:0005743);; Cellular Component: vacuole (GO:0005773);; Cellular Component: vacuolar membrane (GO:0005774);; Cellular Component: peroxisome (GO:0005777);; Cellular Component: Golgi apparatus (GO:0005794);; Cellular Component: c…	K00940|1.33897e-105|osa:4343275|Os07g0492000; K00940 nucleoside-diphosphate kinase [EC:2.7.4.6] (A)	ko00230:Purine metabolism;ko00240:Pyrimidine metabolism	[F]	Nucleotide transport and metabolism	Nucleoside diphosphate kinase	Nucleoside diphosphate kinase 1 OS=Oryza sativa subsp. japonica OX=39947 GN=NDKR PE=1 SV=1	F	Nucleotide transport and metabolism	PREDICTED: nucleoside diphosphate kinase 1 [Oryza sativa Japonica Group]	-	14	2	1833508018335130
LOC_OS07G32670	--	--	Molecular Function: Rab GTPase activator activity (GO:0005097);; Cellular Component: plastid (GO:0009536);; Biological Process: positive regulation of Rab GTPase activity (GO:0032851);;	--	--	[S]	Function unknown	Rab3 GTPase-activating protein catalytic subunit	--	S	Function unknown	PREDICTED: rab3 GTPase-activating protein catalytic subunit isoform X1 [Oryza sativa Japonica Group]	+	2	1	19505152
LOC_OS09G39540	--	--	Biological Process: RNA methylation (GO:0001510);; Molecular Function: structural constituent of ribosome (GO:0003735);; Cellular Component: nucleolus (GO:0005730);; Cellular Component: vacuolar membrane (GO:0005774);; Cellular Component: Golgi apparatus (GO:0005794);; Cellular Component: plasma membrane (GO:0005886);; Biological Process: translation (GO:0006412);; Cellular Component: plasmodesma…	K02975|3.18965e-46|osa:4347899|Os09g0568800; K02975 small subunit ribosomal protein S25e (A)	ko03010:Ribosome	[J]	Translation, ribosomal structure and biogenesis	S25 ribosomal protein	40S ribosomal protein S25 OS=Solanum lycopersicum OX=4081 GN=RPS25 PE=3 SV=1	J	Translation, ribosomal structure and biogenesis	PREDICTED: 40S ribosomal protein S25-2 [Oryza sativa Japonica Group]	-	14	3	2.27018e+23
LOC_OS07G24190	--	--	Biological Process: cell morphogenesis (GO:0000902);; Cellular Component: endosome (GO:0005768);; Cellular Component: Golgi apparatus (GO:0005794);; Cellular Component: trans-Golgi network (GO:0005802);; Cellular Component: plasma membrane (GO:0005886);; Biological Process: glycolytic process (GO:0006096);; Biological Process: calcium ion transport (GO:0006816);; Biological Process: water transpo…	K10999|0|osa:4343049|Os07g0424400; K10999 cellulose synthase A [EC:2.4.1.12] (A)	--	--	--	Cellulose synthase;; Zinc-binding RING-finger;; Glycosyl transferase family group 2;; Glycosyl transferase family 2	Probable cellulose synthase A catalytic subunit 3 [UDP-forming] OS=Oryza sativa subsp. japonica OX=39947 GN=CESA3 PE=2 SV=1	M	Cell wall/membrane/envelope biogenesis	PREDICTED: probable cellulose synthase A catalytic subunit 3 [UDP-forming] [Oryza sativa Japonica Group]	-	71	5	1.37416e+39
LOC_OS05G35060	--	--	Cellular Component: plasma membrane (GO:0005886);; Cellular Component: chloroplast (GO:0009507);; Biological Process: response to insect (GO:0009625);; Biological Process: systemic acquired resistance, salicylic acid mediated signaling pathway (GO:0009862);; Molecular Function: magnesium ion transmembrane transporter activity (GO:0015095);; Biological Process: magnesium ion transport (GO:0015693)…	--	--	[S]	Function unknown	Magnesium transporter NIPA	Probable magnesium transporter NIPA4 OS=Arabidopsis thaliana OX=3702 GN=At1g71900 PE=2 SV=1	S	Function unknown	PREDICTED: probable magnesium transporter NIPA4 [Oryza sativa Japonica Group]	-	5	1	20807122
LOC_OS01G05820	--	--	Biological Process: response to hypoxia (GO:0001666);; Molecular Function: gamma-glutamyltransferase activity (GO:0003840);; Molecular Function: L-alanine:2-oxoglutarate aminotransferase activity (GO:0004021);; Cellular Component: vacuole (GO:0005773);; Cellular Component: peroxisome (GO:0005777);; Cellular Component: plasma membrane (GO:0005886);; Biological Process: glutathione catabolic proces…	K00681|0|osa:4324526|Os01g0151500; K00681 gamma-glutamyltranspeptidase / glutathione hydrolase [EC:2.3.2.2 3.4.19.13] (A)	ko00430:Taurine and hypotaurine metabolism;ko00460:Cyanoamino acid metabolism;ko00480:Glutathione metabolism	[E]	Amino acid transport and metabolism	Gamma-glutamyltranspeptidase	Glutathione hydrolase 3 OS=Arabidopsis thaliana OX=3702 GN=GGT3 PE=2 SV=1	E	Amino acid transport and metabolism	PREDICTED: gamma-glutamyltranspeptidase 3 [Oryza sativa Japonica Group]	+	2	1	2790563
LOC_OS01G24750	--	--	Cellular Component: protein phosphatase type 1 complex (GO:0000164);; Molecular Function: phosphoprotein phosphatase activity (GO:0004721);; Molecular Function: protein serine/threonine phosphatase activity (GO:0004722);; Cellular Component: nucleolus (GO:0005730);; Biological Process: protein dephosphorylation (GO:0006470);; Biological Process: N-terminal protein myristoylation (GO:0006499);; Bi…	K06269|0|osa:4326473|Os01g0349400; K06269 serine/threonine-protein phosphatase PP1 catalytic subunit [EC:3.1.3.16] (A)	ko03015:mRNA surveillance pathway	[TR]	--	Calcineurin-like phosphoesterase;; Serine-threonine protein phosphatase N-terminal domain	Serine/threonine-protein phosphatase PP1 OS=Phaseolus vulgaris OX=3885 PE=2 SV=1	T	Signal transduction mechanisms	PREDICTED: serine/threonine-protein phosphatase PP1 [Oryza sativa Japonica Group]	-	13	2	1392250013922510
LOC_OS03G51220	--	--	Biological Process: reproduction (GO:0000003);; Molecular Function: DNA binding (GO:0003677);; Molecular Function: chromatin binding (GO:0003682);; Molecular Function: protein binding (GO:0005515);; Cellular Component: nucleus (GO:0005634);; Biological Process: regulation of transcription, DNA-templated (GO:0006355);; Biological Process: RNA processing (GO:0006396);; Biological Process: response …	--	--	[B]	Chromatin structure and dynamics	SWIRM domain;; SWIRM-associated region 1;; Myb-like DNA-binding domain;; Zinc finger, ZZ type;; Myb-like DNA-binding domain	SWI/SNF complex subunit SWI3D OS=Arabidopsis thaliana OX=3702 GN=SWI3D PE=1 SV=3	BK	--	PREDICTED: SWI/SNF complex subunit SWI3D isoform X2 [Oryza sativa Japonica Group]	+	3	1	29302076
LOC_OS01G72330	--	--	Molecular Function: phosphorelay response regulator activity (GO:0000156);; Biological Process: phosphorelay signal transduction system (GO:0000160);; Molecular Function: DNA binding (GO:0003677);; Molecular Function: protein serine/threonine kinase activity (GO:0004674);; Molecular Function: protein binding (GO:0005515);; Cellular Component: nucleus (GO:0005634);; Cellular Component: cytoplasm (…	K14492|3.99932e-104|osa:4325747|Os01g0952500; K14492 two-component response regulator ARR-A family (A)	ko04075:Plant hormone signal transduction	[K]	Transcription	Response regulator receiver domain	Two-component response regulator ORR4 OS=Oryza sativa subsp. japonica OX=39947 GN=RR4 PE=2 SV=1	K	Transcription	PREDICTED: two-component response regulator ORR4 [Oryza sativa Japonica Group]	+	6	1	41952228
LOC_OS05G35710	--	--	Molecular Function: binding (GO:0005488);; Cellular Component: endoplasmic reticulum (GO:0005783);; Cellular Component: cytoplasmic membrane-bounded vesicle (GO:0016023);; Cellular Component: nuclear lumen (GO:0031981);; Biological Process: single-organism cellular process (GO:0044763);; Biological Process: regulation of cellular process (GO:0050794);;	--	--	[S]	Function unknown	Protein of unknown function (DUF1682)	Uncharacterized protein At5g49945 OS=Arabidopsis thaliana OX=3702 GN=At5g49945 PE=2 SV=1	S	Function unknown	hypothetical protein OsJ_18647 [Oryza sativa Japonica Group]	+	12	2	2120485321204880
LOC_OS09G32050	--	--	Cellular Component: endoplasmic reticulum lumen (GO:0005788);; Cellular Component: Golgi apparatus (GO:0005794);; Cellular Component: plasma membrane (GO:0005886);; Biological Process: protein folding (GO:0006457);; Biological Process: ER-nucleus signaling pathway (GO:0006984);; Molecular Function: cytoskeletal protein binding (GO:0008092);; Cellular Component: plasmodesma (GO:0009506);; Biologic…	--	--	[O]	Posttranslational modification, protein turnover, chaperones	X-domain of DnaJ-containing;; DnaJ domain	Chaperone protein dnaJ 10 OS=Arabidopsis thaliana OX=3702 GN=ATJ10 PE=2 SV=2	O	Posttranslational modification, protein turnover, chaperones	PREDICTED: chaperone protein dnaJ 10 isoform X1 [Oryza sativa Japonica Group]	-	3	1	19125413
LOC_OS06G19660	--	--	Cellular Component: cytoplasmic mRNA processing body (GO:0000932);; Molecular Function: protein kinase activity (GO:0004672);; Cellular Component: nucleus (GO:0005634);; Cellular Component: cytosol (GO:0005829);; Biological Process: protein phosphorylation (GO:0006468);; Cellular Component: plastid (GO:0009536);; Biological Process: plant-type cell wall organization (GO:0009664);; Biological Proc…	K12616|0|osa:4340825|Os06g0300800; K12616 enhancer of mRNA-decapping protein 4 (A)	ko03018:RNA degradation	[R]	General function prediction only	WD40 region of Ge1, enhancer of mRNA-decapping protein;; WD domain, G-beta repeat	Enhancer of mRNA-decapping protein 4 OS=Arabidopsis thaliana OX=3702 GN=VCS PE=1 SV=1	S	Function unknown	PREDICTED: enhancer of mRNA-decapping protein 4 isoform X1 [Oryza sativa Japonica Group]	+	2	1	11228498
LOC_OS04G56160	--	--	Molecular Function: protein binding (GO:0005515);; Molecular Function: ATP binding (GO:0005524);; Cellular Component: nucleus (GO:0005634);; Cellular Component: vacuole (GO:0005773);; Cellular Component: plasma membrane (GO:0005886);; Biological Process: ATP catabolic process (GO:0006200);; Biological Process: ATP biosynthetic process (GO:0006754);; Molecular Function: hydrogen-exporting ATPase a…	K01535|0|osa:4337257|Os04g0656100; K01535 H+-transporting ATPase [EC:3.6.3.6] (A)	ko00190:Oxidative phosphorylation	[P]	Inorganic ion transport and metabolism	E1-E2 ATPase;; haloacid dehalogenase-like hydrolase;; Cation transporter/ATPase, N-terminus;; haloacid dehalogenase-like hydrolase	Plasma membrane ATPase OS=Oryza sativa subsp. japonica OX=39947 GN=Os04g0656100 PE=2 SV=1	P	Inorganic ion transport and metabolism	PREDICTED: plasma membrane ATPase [Oryza sativa Japonica Group]	+	103	4	3.34648e+31
LOC_OS09G37600	--	--	Cellular Component: plasma membrane (GO:0005886);; Biological Process: drug transmembrane transport (GO:0006855);; Biological Process: response to stress (GO:0006950);; Biological Process: immune response (GO:0006955);; Molecular Function: drug transmembrane transporter activity (GO:0015238);; Molecular Function: antiporter activity (GO:0015297);; Cellular Component: membrane (GO:0016020);; Biolo…	--	--	--	--	LysM domain	Chitin elicitor-binding protein OS=Oryza sativa subsp. japonica OX=39947 GN=CEBIP PE=1 SV=1	S	Function unknown	PREDICTED: chitin elicitor-binding protein-like [Oryza sativa Japonica Group]	+	2	1	21680257
LOC_OS10G36650	--	--	Molecular Function: structural constituent of cytoskeleton (GO:0005200);; Molecular Function: protein binding (GO:0005515);; Molecular Function: ATP binding (GO:0005524);; Cellular Component: cell wall (GO:0005618);; Cellular Component: nucleolus (GO:0005730);; Cellular Component: mitochondrion (GO:0005739);; Cellular Component: cytosol (GO:0005829);; Cellular Component: cytoskeleton (GO:0005856)…	K10355|0|osa:4349087|Os10g0510000; K10355 actin, other eukaryote (A)	--	[Z]	Cytoskeleton	Actin	Actin-2 OS=Oryza sativa subsp. japonica OX=39947 GN=ACT2 PE=2 SV=1	Z	Cytoskeleton	PREDICTED: actin-2 [Oryza sativa Japonica Group]	+	25	3	1.96106e+23
LOC_OS01G67820	--	--	Cellular Component: exocyst (GO:0000145);; Cellular Component: nucleus (GO:0005634);; Biological Process: exocytosis (GO:0006887);; Biological Process: protein localization (GO:0008104);; Biological Process: anatomical structure morphogenesis (GO:0009653);; Biological Process: cellular component organization (GO:0016043);; Biological Process: cell growth (GO:0016049);; Biological Process: cellula…	--	--	[U]	Intracellular trafficking, secretion, and vesicular transport	Exo70 exocyst complex subunit	Exocyst complex component EXO70A1 OS=Arabidopsis thaliana OX=3702 GN=EXO70A1 PE=1 SV=1	S	Function unknown	PREDICTED: exocyst complex component EXO70A1 [Oryza sativa Japonica Group]	+	14	2	3941318939413120
LOC_OS11G41820	--	--	Molecular Function: nucleotide binding (GO:0000166);; Molecular Function: RNA binding (GO:0003723);; Molecular Function: catalytic activity (GO:0003824);; Cellular Component: nucleus (GO:0005634);; Cellular Component: nucleolus (GO:0005730);; Cellular Component: cytosol (GO:0005829);; Biological Process: regulation of transcription, DNA-templated (GO:0006355);; Biological Process: mRNA processing…	K12837|0|osa:4350981|Os11g0636900; K12837 splicing factor U2AF 65 kDa subunit (A)	ko03040:Spliceosome	[A]	RNA processing and modification	RNA recognition motif. (a.k.a. RRM, RBD, or RNP domain);; RNA recognition motif	Splicing factor U2af large subunit A OS=Oryza sativa subsp. japonica OX=39947 GN=U2AF65A PE=2 SV=2	S	Function unknown	PREDICTED: splicing factor U2af large subunit A [Oryza sativa Japonica Group]	-	9	1	25148721
LOC_OS06G45070	--	--	Molecular Function: calmodulin binding (GO:0005516);; Cellular Component: vacuole (GO:0005773);; Biological Process: response to cold (GO:0009409);; Cellular Component: plasmodesma (GO:0009506);; Biological Process: leaf senescence (GO:0010150);; Biological Process: gene expression (GO:0010467);; Biological Process: mRNA metabolic process (GO:0016071);; Cellular Component: nuclear speck (GO:00166…	K15455|2.50645e-53|osa:4341747|Os06g0661600; K15455 diphthamide biosynthesis protein 3 (A)	--	[S]	Function unknown	CSL zinc finger	--	S	Function unknown	PREDICTED: diphthamide biosynthesis protein 3 [Oryza sativa Japonica Group]	+	11	2	2726482627264750
LOC_OS12G31780	--	--	Biological Process: polysaccharide biosynthetic process (GO:0000271);; Molecular Function: sequence-specific DNA binding transcription factor activity (GO:0003700);; Cellular Component: nucleus (GO:0005634);; Cellular Component: mitochondrion (GO:0005739);; Cellular Component: microtubule (GO:0005874);; Cellular Component: spindle microtubule (GO:0005876);; Cellular Component: plasma membrane (GO…	K18635|4.04372e-50|osa:4352277|Os12g0502000; K18635 protein SPIRAL1 and related proteins (A)	--	--	--	--	Protein SPIRAL1-like 3 OS=Oryza sativa subsp. japonica OX=39947 GN=Os12g0502000 PE=3 SV=1	S	Function unknown	PREDICTED: protein SPIRAL1-like 3 [Oryza sativa Japonica Group]	-	11	3	1.91219e+23
LOC_OS04G59480	--	--	Molecular Function: transporter activity (GO:0005215);; Cellular Component: vacuolar membrane (GO:0005774);; Biological Process: transport (GO:0006810);; Biological Process: oligopeptide transport (GO:0006857);; Biological Process: response to stress (GO:0006950);; Biological Process: response to nematode (GO:0009624);; Biological Process: response to organic cyclic compound (GO:0014070);; Cellul…	--	--	[E]	Amino acid transport and metabolism	POT family;; Major Facilitator Superfamily	Protein NRT1/ PTR FAMILY 5.16 OS=Arabidopsis thaliana OX=3702 GN=NPF5.16 PE=2 SV=1	E	Amino acid transport and metabolism	PREDICTED: protein NRT1/ PTR FAMILY 5.10 [Oryza sativa Japonica Group]	+	6	1	35363535
LOC_OS01G37690	--	--	Molecular Function: protein binding (GO:0005515);; Cellular Component: vacuolar membrane (GO:0005774);; Cellular Component: plasma membrane (GO:0005886);; Biological Process: phosphorus metabolic process (GO:0006793);; Biological Process: sodium ion transport (GO:0006814);; Biological Process: calcium ion transport (GO:0006816);; Biological Process: cellular calcium ion homeostasis (GO:0006874);;…	K07300|0|osa:4324573|Os01g0557500; K07300 Ca2+:H+ antiporter (A)	--	[P]	Inorganic ion transport and metabolism	Sodium/calcium exchanger protein	Vacuolar cation/proton exchanger 1a OS=Oryza sativa subsp. japonica OX=39947 GN=CAX1a PE=1 SV=1	P	Inorganic ion transport and metabolism	PREDICTED: vacuolar cation/proton exchanger 1a [Oryza sativa Japonica Group]	-	35	2	2107161221071500
LOC_OS09G21470	--	--	Cellular Component: mitochondrion (GO:0005739);;	--	--	--	--	--	Succinate dehydrogenase subunit 7, mitochondrial OS=Oryza sativa subsp. japonica OX=39947 GN=SDH7 PE=1 SV=1	S	Function unknown	PREDICTED: succinate dehydrogenase subunit 7, mitochondrial [Oryza sativa Japonica Group]	-	6	1	12977797
LOC_OS03G56460	--	--	Molecular Function: glucose-6-phosphate isomerase activity (GO:0004347);; Cellular Component: cytosol (GO:0005829);; Biological Process: gluconeogenesis (GO:0006094);; Biological Process: glycolytic process (GO:0006096);; Biological Process: defense response to fungus, incompatible interaction (GO:0009817);; Biological Process: response to cadmium ion (GO:0046686);;	K01810|0|osa:4334290|Os03g0776000; K01810 glucose-6-phosphate isomerase [EC:5.3.1.9] (A)	ko00010:Glycolysis / Gluconeogenesis;ko00030:Pentose phosphate pathway;ko00500:Starch and sucrose metabolism;ko00520:Amino sugar and nucleotide sugar metabolism;ko01200:Carbon metabolism	[G]	Carbohydrate transport and metabolism	Phosphoglucose isomerase	Glucose-6-phosphate isomerase, cytosolic A OS=Oryza sativa subsp. japonica OX=39947 GN=Os03g0776000 PE=2 SV=2	G	Carbohydrate transport and metabolism	PREDICTED: glucose-6-phosphate isomerase, cytosolic A [Oryza sativa Japonica Group]	+	6	1	32182050
LOC_OS01G54100	--	--	Molecular Function: protein serine/threonine kinase activity (GO:0004674);; Molecular Function: ATP binding (GO:0005524);; Cellular Component: mitochondrion (GO:0005739);; Biological Process: protein phosphorylation (GO:0006468);; Biological Process: defense response (GO:0006952);; Biological Process: multicellular organismal development (GO:0007275);; Biological Process: catabolic process (GO:00…	--	--	[T]	Signal transduction mechanisms	Protein kinase domain;; Protein tyrosine kinase	Casein kinase 1-like protein HD16 OS=Oryza sativa subsp. japonica OX=39947 GN=HD16 PE=1 SV=1	T	Signal transduction mechanisms	PREDICTED: uncharacterized protein LOC4326170 [Oryza sativa Japonica Group]	-	13	3	3.11113e+23
LOC_OS03G21690	--	--	Cellular Component: vacuole (GO:0005773);; Cellular Component: integral component of membrane (GO:0016021);;	--	--	[S]	Function unknown	Lung seven transmembrane receptor	--	S	Function unknown	PREDICTED: transmembrane protein 87B [Oryza sativa Japonica Group]	-	6	1	12380605
LOC_OS04G56580	--	--	Molecular Function: ATP binding (GO:0005524);; Biological Process: myo-inositol hexakisphosphate biosynthetic process (GO:0010264);; Biological Process: phosphorylation (GO:0016310);; Biological Process: cellular phosphate ion homeostasis (GO:0030643);; Molecular Function: inositol tetrakisphosphate 2-kinase activity (GO:0032942);; Molecular Function: inositol pentakisphosphate 2-kinase activity …	K10572|0|osa:4337286|Os04g0661200; K10572 inositol-pentakisphosphate 2-kinase [EC:2.7.1.158] (A)	ko00562:Inositol phosphate metabolism;ko04070:Phosphatidylinositol signaling system	[T]	Signal transduction mechanisms	Inositol-pentakisphosphate 2-kinase	Inositol-pentakisphosphate 2-kinase IPK1 OS=Oryza sativa subsp. japonica OX=39947 GN=IPK1 PE=2 SV=1	S	Function unknown	PREDICTED: inositol-pentakisphosphate 2-kinase IPK1 [Oryza sativa Japonica Group]	-	4	1	33735181
LOC_OS01G74470	--	--	Biological Process: polysaccharide biosynthetic process (GO:0000271);; Molecular Function: protein binding (GO:0005515);; Molecular Function: ATP binding (GO:0005524);; Cellular Component: nucleus (GO:0005634);; Cellular Component: plasma membrane (GO:0005886);; Biological Process: ATP catabolic process (GO:0006200);; Biological Process: cell adhesion (GO:0007155);; Biological Process: regulation…	--	--	[Q]	Secondary metabolites biosynthesis, transport and catabolism	ABC transporter transmembrane region;; ABC transporter;; P-loop containing region of AAA domain	ABC transporter B family member 20 OS=Arabidopsis thaliana OX=3702 GN=ABCB20 PE=1 SV=1	V	Defense mechanisms	PREDICTED: ABC transporter B family member 20 [Oryza sativa Japonica Group]	-	2	1	43125997
LOC_OS03G50300	--	--	Biological Process: microtubule cytoskeleton organization (GO:0000226);; Cellular Component: endosome (GO:0005768);; Cellular Component: trans-Golgi network (GO:0005802);; Biological Process: DNA metabolic process (GO:0006259);; Biological Process: intra-Golgi vesicle-mediated transport (GO:0006891);; Biological Process: meiotic nuclear division (GO:0007126);; Biological Process: pattern specific…	K09313|0|osa:4333881|Os03g0710900; K09313 homeobox protein cut-like (A)	--	[K]	Transcription	CASP C terminal	Protein CASP OS=Arabidopsis thaliana OX=3702 GN=CASP PE=1 SV=2	U	Intracellular trafficking, secretion, and vesicular transport	expressed protein [Oryza sativa Japonica Group]	+	5	1	28679039
LOC_OS03G44830	--	--	Molecular Function: serine-type endopeptidase activity (GO:0004252);; Cellular Component: integral component of membrane (GO:0016021);;	--	--	[S]	Function unknown	Rhomboid family;; UBA/TS-N domain	Rhomboid-like protein 15 OS=Arabidopsis thaliana OX=3702 GN=RBL15 PE=1 SV=2	S	Function unknown	PREDICTED: rhomboid-like protein 15 [Oryza sativa Japonica Group]	-	6	1	25279443
LOC_OS10G41490	--	--	Molecular Function: protein serine/threonine kinase activity (GO:0004674);; Molecular Function: protein binding (GO:0005515);; Molecular Function: ATP binding (GO:0005524);; Cellular Component: nucleus (GO:0005634);; Cellular Component: cytosol (GO:0005829);; Cellular Component: plasma membrane (GO:0005886);; Biological Process: sucrose metabolic process (GO:0005985);; Biological Process: protein…	K14498|0|osa:4349411|Os10g0564500; K14498 serine/threonine-protein kinase SRK2 [EC:2.7.11.1] (A)	ko04075:Plant hormone signal transduction	[T]	Signal transduction mechanisms	Protein kinase domain;; Protein tyrosine kinase	Serine/threonine-protein kinase SAPK3 OS=Oryza sativa subsp. japonica OX=39947 GN=SAPK3 PE=1 SV=1	T	Signal transduction mechanisms	PREDICTED: serine/threonine-protein kinase SAPK3 [Oryza sativa Japonica Group]	-	5	2	2229489222294920
LOC_OS03G56380	--	--	Cellular Component: endosome (GO:0005768);; Cellular Component: Golgi apparatus (GO:0005794);; Cellular Component: trans-Golgi network (GO:0005802);; Biological Process: polysaccharide metabolic process (GO:0005976);; Biological Process: response to stress (GO:0006950);; Biological Process: multicellular organismal development (GO:0007275);; Molecular Function: methyltransferase activity (GO:0008…	--	--	--	--	Putative S-adenosyl-L-methionine-dependent methyltransferase;; Methyltransferase domain;; Methyltransferase domain	Probable methyltransferase PMT28 OS=Arabidopsis thaliana OX=3702 GN=At1g19430 PE=2 SV=1	S	Function unknown	PREDICTED: probable methyltransferase PMT28 [Oryza sativa Japonica Group]	+	11	1	32146666
LOC_OS02G02530	--	--	Molecular Function: aspartic-type endopeptidase activity (GO:0004190);; Molecular Function: metalloendopeptidase activity (GO:0004222);; Cellular Component: mitochondrion (GO:0005739);; Cellular Component: endosome (GO:0005768);; Cellular Component: endoplasmic reticulum membrane (GO:0005789);; Cellular Component: Golgi apparatus (GO:0005794);; Biological Process: N-terminal protein myristoylatio…	K09595|0|osa:4328088|Os02g0117400; K09595 minor histocompatibility antigen H13 [EC:3.4.23.-] (A)	--	[S]	Function unknown	Signal peptide peptidase	Signal peptide peptidase 1 OS=Oryza sativa subsp. japonica OX=39947 GN=SPP1 PE=2 SV=1	U	Intracellular trafficking, secretion, and vesicular transport	PREDICTED: signal peptide peptidase 1 [Oryza sativa Japonica Group]	+	29	2	911368911334
LOC_OS04G41950	--	--	Molecular Function: calcium ion binding (GO:0005509);; Cellular Component: mitochondrion (GO:0005739);; Cellular Component: integral component of membrane (GO:0016021);;	K17800|0|osa:4336282|Os04g0496800; K17800 LETM1 and EF-hand domain-containing protein 1, mitochondrial (A)	--	[S]	Function unknown	LETM1-like protein;; EF-hand domain pair	--	S	Function unknown	PREDICTED: LETM1 and EF-hand domain-containing protein 1, mitochondrial [Oryza sativa Japonica Group]	-	3	1	24846907
LOC_OS02G21660	--	--	Biological Process: RNA methylation (GO:0001510);; Molecular Function: RNA binding (GO:0003723);; Molecular Function: structural constituent of ribosome (GO:0003735);; Cellular Component: nucleolus (GO:0005730);; Cellular Component: plasma membrane (GO:0005886);; Biological Process: rRNA processing (GO:0006364);; Biological Process: translation (GO:0006412);; Cellular Component: plasmodesma (GO:0…	K02865|7.52038e-142|osa:4329171|Os02g0321900; K02865 large subunit ribosomal protein L10Ae (A)	ko03010:Ribosome	[J]	Translation, ribosomal structure and biogenesis	Ribosomal protein L1p/L10e family	60S ribosomal protein L10a OS=Oryza sativa subsp. japonica OX=39947 GN=RPL10A PE=1 SV=1	J	Translation, ribosomal structure and biogenesis	PREDICTED: 60S ribosomal protein L10a [Oryza sativa Japonica Group]	+	7	1	12872249
LOC_OS05G45130	--	--	Molecular Function: DNA binding (GO:0003677);; Molecular Function: catalytic activity (GO:0003824);; Biological Process: DNA recombination (GO:0006310);; Molecular Function: zinc ion binding (GO:0008270);; Cellular Component: plastid (GO:0009536);; Biological Process: DNA integration (GO:0015074);; Cellular Component: membrane (GO:0016020);;	--	--	[R]	General function prediction only	gag-polypeptide of LTR copia-type	--	L	Replication, recombination and repair	PREDICTED: uncharacterized protein LOC4339390 [Oryza sativa Japonica Group]	+	3	1	26208705
LOC_OS06G48970	--	--	Cellular Component: nucleolus (GO:0005730);; Cellular Component: peroxisome (GO:0005777);; Molecular Function: kinase activity (GO:0016301);; Biological Process: phosphorylation (GO:0016310);; Biological Process: peroxisomal transport (GO:0043574);;	--	--	--	--	--	Protein APEM9 OS=Arabidopsis thaliana OX=3702 GN=APEM9 PE=1 SV=1	S	Function unknown	PREDICTED: uncharacterized protein LOC4341980 [Oryza sativa Japonica Group]	+	3	1	29673505
LOC_OS08G38320	--	--	Biological Process: microtubule cytoskeleton organization (GO:0000226);; Biological Process: mitotic cell cycle (GO:0000278);; Biological Process: cytokinesis by cell plate formation (GO:0000911);; Molecular Function: protein serine/threonine kinase activity (GO:0004674);; Molecular Function: ATP binding (GO:0005524);; Cellular Component: nucleolus (GO:0005730);; Cellular Component: cytoplasm (GO…	--	--	[R]	General function prediction only	Protein kinase domain;; Protein tyrosine kinase	Protein kinase G11A OS=Oryza sativa subsp. japonica OX=39947 GN=Os06g0291600 PE=2 SV=1	T	Signal transduction mechanisms	PREDICTED: serine/threonine-protein kinase D6PK [Oryza sativa Japonica Group]	+	8	1	24277320
LOC_OS05G39350	--	--	Cellular Component: nucleus (GO:0005634);; Cellular Component: mitochondrion (GO:0005739);; Cellular Component: Golgi apparatus (GO:0005794);; Cellular Component: plasma membrane (GO:0005886);; Biological Process: response to water deprivation (GO:0009414);; Biological Process: response to salt stress (GO:0009651);; Biological Process: plant-type cell wall modification (GO:0009827);; Biological P…	--	--	--	--	GDSL/SGNH-like Acyl-Esterase family found in Pmr5 and Cas1p;; PMR5 N terminal Domain	Protein ESKIMO 1 OS=Arabidopsis thaliana OX=3702 GN=ESK1 PE=1 SV=1	S	Function unknown	PREDICTED: protein trichome birefringence-like 28 [Oryza sativa Japonica Group]	-	28	4	2.30812e+31
LOC_OS03G59020	--	--	Biological Process: mitotic G2 phase (GO:0000085);; Biological Process: RNA methylation (GO:0001510);; Molecular Function: binding (GO:0005488);; Molecular Function: ATP binding (GO:0005524);; Cellular Component: cytosol (GO:0005829);; Biological Process: gluconeogenesis (GO:0006094);; Biological Process: protein folding (GO:0006457);; Biological Process: cytoskeleton organization (GO:0007010);; …	K09500|0|osa:4334490|Os03g0804800; K09500 T-complex protein 1 subunit theta (A)	--	[O]	Posttranslational modification, protein turnover, chaperones	TCP-1/cpn60 chaperonin family	T-complex protein 1 subunit theta OS=Arabidopsis thaliana OX=3702 GN=CCT8 PE=1 SV=1	O	Posttranslational modification, protein turnover, chaperones	PREDICTED: T-complex protein 1 subunit theta [Oryza sativa Japonica Group]	+	30	3	3.3598e+23
LOC_OS01G45550	--	--	Biological Process: polysaccharide biosynthetic process (GO:0000271);; Cellular Component: lytic vacuole (GO:0000323);; Molecular Function: protein binding (GO:0005515);; Cellular Component: mitochondrion (GO:0005739);; Cellular Component: endoplasmic reticulum (GO:0005783);; Biological Process: asymmetric cell division (GO:0008356);; Biological Process: regulation of cell size (GO:0008361);; Bio…	K13947|0|osa:4326565|Os01g0643300; K13947 auxin efflux carrier family (A)	--	--	--	Membrane transport protein	Auxin efflux carrier component 3a OS=Oryza sativa subsp. japonica OX=39947 GN=PIN3A PE=2 SV=1	--	--	PREDICTED: probable auxin efflux carrier component 3a [Oryza sativa Japonica Group]	+	8	1	25868263
LOC_OS03G15350	--	--	Molecular Function: catalytic activity (GO:0003824);; Cellular Component: mitochondrion (GO:0005739);; Cellular Component: endoplasmic reticulum (GO:0005783);; Biological Process: ER to Golgi vesicle-mediated transport (GO:0006888);; Cellular Component: membrane (GO:0016020);; Cellular Component: cytoplasmic membrane-bounded vesicle (GO:0016023);; Biological Process: cellular component organizati…	K14026|0|osa:4332310|Os03g0259300; K14026 SEL1 protein (A)	ko04141:Protein processing in endoplasmic reticulum	[MOT]	--	Sel1 repeat;; Tetratricopeptide repeat	ERAD-associated E3 ubiquitin-protein ligase component HRD3 OS=Oryza sativa subsp. japonica OX=39947 GN=HRD3 PE=2 SV=1	S	Function unknown	PREDICTED: ERAD-associated E3 ubiquitin-protein ligase component HRD3 [Oryza sativa Japonica Group]	+	4	2	84061068405626
LOC_OS04G32950	--	--	Biological Process: MAPK cascade (GO:0000165);; Molecular Function: calcium ion binding (GO:0005509);; Cellular Component: mitochondrion (GO:0005739);; Cellular Component: vacuole (GO:0005773);; Cellular Component: vacuolar membrane (GO:0005774);; Cellular Component: endoplasmic reticulum (GO:0005783);; Cellular Component: endoplasmic reticulum membrane (GO:0005789);; Cellular Component: Golgi ap…	K08054|0|osa:4335732|Os04g0402100; K08054 calnexin (A)	ko04141:Protein processing in endoplasmic reticulum;ko04145:Phagosome	[O]	Posttranslational modification, protein turnover, chaperones	Calreticulin family	Calnexin homolog OS=Glycine max OX=3847 PE=2 SV=1	U	Intracellular trafficking, secretion, and vesicular transport	PREDICTED: calnexin homolog [Oryza sativa Japonica Group]	-	171	12	1.99134e+95
LOC_OS03G54980	--	--	Biological Process: phosphatidylinositol biosynthetic process (GO:0006661);; Cellular Component: chloroplast (GO:0009507);;	--	--	[S]	Function unknown	Uncharacterised protein family (UPF0139)	Protein Asterix OS=Arabidopsis thaliana OX=3702 GN=At5g07960 PE=3 SV=1	S	Function unknown	PREDICTED: protein Asterix [Oryza sativa Japonica Group]	+	13	2	3125911631259130
LOC_OS08G25060	--	--	Cellular Component: core TFIIH complex (GO:0000439);; Cellular Component: nucleus (GO:0005634);; Biological Process: nucleotide-excision repair (GO:0006289);; Biological Process: transcription, DNA-templated (GO:0006351);;	K03141|0|dosa:Os08t0338200-01|Os08g0338200; Kelch related domain containing protein.; K03141 transcription initiation factor TFIIH subunit 1 (A)	ko03022:Basal transcription factors;ko03420:Nucleotide excision repair	[KL]	--	BSD domain	General transcription and DNA repair factor IIH subunit TFB1-1 OS=Arabidopsis thaliana OX=3702 GN=TFB1-1 PE=2 SV=1	K	Transcription	PREDICTED: probable RNA polymerase II transcription factor B subunit 1-1 isoform X2 [Oryza sativa Japonica Group]	-	4	1	15203200
LOC_OS02G06500	--	--	Molecular Function: nucleic acid binding (GO:0003676);; Molecular Function: ATP binding (GO:0005524);; Cellular Component: vacuole (GO:0005773);; Biological Process: DNA metabolic process (GO:0006259);; Biological Process: potassium ion transport (GO:0006813);; Biological Process: sister chromatid cohesion (GO:0007062);; Molecular Function: ATP-dependent helicase activity (GO:0008026);; Biologica…	--	--	[A]	RNA processing and modification	DSHCT (NUC185) domain;; rRNA-processing arch domain;; Helicase conserved C-terminal domain	DExH-box ATP-dependent RNA helicase DExH11 OS=Arabidopsis thaliana OX=3702 GN=SKI2 PE=1 SV=1	L	Replication, recombination and repair	hypothetical protein OsJ_05464 [Oryza sativa Japonica Group]	-	6	2	32376373237657
LOC_OS08G40620	--	--	Molecular Function: Rab GTPase activator activity (GO:0005097);; Biological Process: positive regulation of Rab GTPase activity (GO:0032851);;	K18469|0|osa:4346046|Os08g0518100; K18469 TBC1 domain family member 5 (A)	--	[U]	Intracellular trafficking, secretion, and vesicular transport	Rab-GTPase-TBC domain	--	S	Function unknown	PREDICTED: TBC1 domain family member 5 homolog A [Oryza sativa Japonica Group]	+	15	3	2.57175e+23
LOC_OS10G42830	--	--	Molecular Function: sugar:proton symporter activity (GO:0005351);; Molecular Function: fructose transmembrane transporter activity (GO:0005353);; Molecular Function: glucose transmembrane transporter activity (GO:0005355);; Cellular Component: plasma membrane (GO:0005886);; Cellular Component: chloroplast (GO:0009507);; Biological Process: response to nematode (GO:0009624);; Cellular Component: p…	--	--	[R]	General function prediction only	Sugar (and other) transporter;; Major Facilitator Superfamily	D-xylose-proton symporter-like 2 OS=Arabidopsis thaliana OX=3702 GN=At5g17010 PE=1 SV=1	G	Carbohydrate transport and metabolism	PREDICTED: D-xylose-proton symporter-like 2 [Oryza sativa Japonica Group]	-	6	2	2309542123095450
LOC_OS02G48570	--	--	Molecular Function: transporter activity (GO:0005215);; Molecular Function: protein binding (GO:0005515);; Cellular Component: Golgi apparatus (GO:0005794);; Cellular Component: plasma membrane (GO:0005886);; Biological Process: polysaccharide metabolic process (GO:0005976);; Biological Process: transport (GO:0006810);; Biological Process: lipid transport (GO:0006869);; Biological Process: intra-…	--	--	[E]	Amino acid transport and metabolism	POT family	Protein NRT1/ PTR FAMILY 7.3 OS=Arabidopsis thaliana OX=3702 GN=NPF7.3 PE=1 SV=2	E	Amino acid transport and metabolism	PREDICTED: protein NRT1/ PTR FAMILY 7.3 isoform X1 [Oryza sativa Japonica Group]	-	17	2	2973629129736310
LOC_OS07G49110	--	--	Molecular Function: ATP binding (GO:0005524);; Cellular Component: cell wall (GO:0005618);; Molecular Function: D-alanine-D-alanine ligase activity (GO:0008716);; Biological Process: peptidoglycan biosynthetic process (GO:0009252);; Cellular Component: chloroplast (GO:0009507);; Molecular Function: metal ion binding (GO:0046872);;	--	--	--	--	D-ala D-ala ligase N-terminus;; D-ala D-ala ligase C-terminus	--	M	Cell wall/membrane/envelope biogenesis	PREDICTED: uncharacterized protein LOC4344370 [Oryza sativa Japonica Group]	+	9	2	2940178729401850
LOC_OS09G39580	--	--	Biological Process: mitotic G2 phase (GO:0000085);; Molecular Function: DNA binding (GO:0003677);; Molecular Function: carboxylic ester hydrolase activity (GO:0004091);; Molecular Function: protein kinase activity (GO:0004672);; Molecular Function: triglyceride lipase activity (GO:0004806);; Molecular Function: binding (GO:0005488);; Cellular Component: nucleus (GO:0005634);; Cellular Component: …	--	--	[IOT]	--	Lipase (class 3);; Lipase 3 N-terminal region	--	S	Function unknown	unnamed protein product [Oryza sativa Japonica Group]	-	5	1	22716628
LOC_OS01G13660	--	--	Cellular Component: membrane (GO:0016020);;	--	--	--	--	--	--	S	Function unknown	PREDICTED: uncharacterized protein LOC4326356 [Oryza sativa Japonica Group]	-	10	1	7654044
LOC_OS02G53690	--	--	Molecular Function: ATP binding (GO:0005524);; Cellular Component: cell wall (GO:0005618);; Cellular Component: nucleus (GO:0005634);; Cellular Component: nuclear envelope (GO:0005635);; Cellular Component: mitochondrion (GO:0005739);; Cellular Component: vacuole (GO:0005773);; Cellular Component: Golgi apparatus (GO:0005794);; Cellular Component: cytosol (GO:0005829);; Cellular Component: plasma…	--	--	--	--	WRC;; QLQ	Growth-regulating factor 1 OS=Oryza sativa subsp. japonica OX=39947 GN=GRF1 PE=3 SV=1	K	Transcription	PREDICTED: growth-regulating factor 1 [Oryza sativa Japonica Group]	-	2	1	32840449
LOC_OS03G28330	--	--	Biological Process: response to hypoxia (GO:0001666);; Cellular Component: mitochondrion (GO:0005739);; Cellular Component: vacuole (GO:0005773);; Cellular Component: cytosol (GO:0005829);; Cellular Component: plasma membrane (GO:0005886);; Biological Process: sucrose metabolic process (GO:0005985);; Biological Process: sucrose biosynthetic process (GO:0005986);; Biological Process: response to o…	K00695|0|osa:4333062|Os03g0401300; K00695 sucrose synthase [EC:2.4.1.13] (A)	ko00500:Starch and sucrose metabolism	[M]	Cell wall/membrane/envelope biogenesis	Sucrose synthase;; Glycosyl transferases group 1;; Glycosyl transferases group 1	Sucrose synthase 1 OS=Oryza sativa subsp. japonica OX=39947 GN=SUS1 PE=1 SV=1	M	Cell wall/membrane/envelope biogenesis	PREDICTED: sucrose synthase 1 [Oryza sativa Japonica Group]	-	525	8	1.63014e+63
LOC_OS01G66580	--	--	Molecular Function: DNA binding (GO:0003677);; Molecular Function: DNA-directed RNA polymerase activity (GO:0003899);; Cellular Component: DNA-directed RNA polymerase III complex (GO:0005666);; Biological Process: transcription from RNA polymerase III promoter (GO:0006383);; Cellular Component: plastid (GO:0009536);;	K03026|7.84518e-110|osa:4324905|Os01g0889200; K03026 DNA-directed RNA polymerase III subunit RPC4 (A)	ko00230:Purine metabolism;ko00240:Pyrimidine metabolism;ko03020:RNA polymerase	[K]	Transcription	RNA polymerase III RPC4	--	K	Transcription	PREDICTED: transcription initiation factor TFIID subunit 7-like isoform X1 [Oryza sativa Japonica Group]	-	13	3	3.86594e+23
LOC_OS05G38180	--	--	Cellular Component: membrane (GO:0016020);;	--	--	[S]	Function unknown	Yip1 domain	--	S	Function unknown	PREDICTED: protein YIPF1 homolog isoform X1 [Oryza sativa Japonica Group]	+	8	1	22397087
LOC_OS03G17990	--	--	Molecular Function: catalytic activity (GO:0003824);; Molecular Function: binding (GO:0005488);; Cellular Component: nucleus (GO:0005634);; Cellular Component: plastid (GO:0009536);; Cellular Component: membrane (GO:0016020);; Biological Process: cellular component organization (GO:0016043);; Biological Process: primary metabolic process (GO:0044238);; Biological Process: cellular macromolecule m…	--	--	[U]	Intracellular trafficking, secretion, and vesicular transport	Yip1 domain	--	U	Intracellular trafficking, secretion, and vesicular transport	PREDICTED: protein YIPF5 homolog [Oryza sativa Japonica Group]	+	8	1	10019433
LOC_OS05G38390	--	--	Molecular Function: copper ion binding (GO:0005507);; Cellular Component: mitochondrion (GO:0005739);; Biological Process: response to water deprivation (GO:0009414);; Biological Process: lignin biosynthetic process (GO:0009809);; Biological Process: plant-type cell wall biogenesis (GO:0009832);; Biological Process: glucuronoxylan metabolic process (GO:0010413);; Cellular Component: cytoplasmic m…	--	--	[Q]	Secondary metabolites biosynthesis, transport and catabolism	Multicopper oxidase;; Multicopper oxidase;; Multicopper oxidase	Putative laccase-11 OS=Oryza sativa subsp. japonica OX=39947 GN=LAC11 PE=5 SV=2	Q	Secondary metabolites biosynthesis, transport and catabolism	Os05g0458300 [Oryza sativa Japonica Group]	-	6	1	22499466
LOC_OS05G05210	--	--	Molecular Function: nucleotide binding (GO:0000166);; Cellular Component: cytoplasm (GO:0005737);; Biological Process: cellular protein modification process (GO:0006464);; Biological Process: defense response (GO:0006952);; Biological Process: signal transduction (GO:0007165);; Biological Process: RNA splicing (GO:0008380);; Biological Process: anatomical structure morphogenesis (GO:0009653);; Bi…	K11801|0|osa:4337782|Os05g0144100; K11801 WD repeat-containing protein 23 (A)	--	[R]	General function prediction only	WD domain, G-beta repeat;; Anaphase-promoting complex subunit 4 WD40 domain	LEC14B protein OS=Lithospermum erythrorhizon OX=34254 PE=2 SV=1	S	Function unknown	PREDICTED: LEC14B protein isoform X1 [Oryza sativa Japonica Group]	+	5	1	2540611
LOC_OS11G29340	--	--	Molecular Function: DNA binding (GO:0003677);;	--	--	--	--	Det1 complexing ubiquitin ligase;; SAP domain	--	S	Function unknown	SAP domain containing protein, expressed [Oryza sativa Japonica Group]	+	5	1	17016136
LOC_OS01G58114	--	--	Cellular Component: vacuole (GO:0005773);; Cellular Component: cytoplasmic membrane-bounded vesicle (GO:0016023);;	--	--	--	--	--	--	S	Function unknown	PREDICTED: uncharacterized protein LOC4324130 isoform X1 [Oryza sativa Japonica Group]	-	3	1	33609376
LOC_OS12G37260	--	--	Biological Process: maltose metabolic process (GO:0000023);; Biological Process: sulfur amino acid metabolic process (GO:0000096);; Molecular Function: iron ion binding (GO:0005506);; Molecular Function: protein binding (GO:0005515);; Cellular Component: mitochondrion (GO:0005739);; Cellular Component: plasma membrane (GO:0005886);; Biological Process: glycine catabolic process (GO:0006546);; Bio…	K00454|0|osa:4352505|Os12g0559200; K00454 lipoxygenase [EC:1.13.11.12] (A)	ko00591:Linoleic acid metabolism;ko00592:alpha-Linolenic acid metabolism	--	--	Lipoxygenase;; PLAT/LH2 domain	Lipoxygenase 2.1, chloroplastic OS=Hordeum vulgare OX=4513 GN=LOX2.1 PE=1 SV=1	S	Function unknown	PREDICTED: lipoxygenase 2.1, chloroplastic isoform X1 [Oryza sativa Japonica Group]	-	12	2	2285480622854890
LOC_OS01G03490	--	--	Biological Process: response to reactive oxygen species (GO:0000302);; Cellular Component: chromatin (GO:0000785);; Molecular Function: protein binding (GO:0005515);; Cellular Component: nucleus (GO:0005634);; Cellular Component: mitochondrion (GO:0005739);; Cellular Component: plasma membrane (GO:0005886);; Biological Process: DNA-dependent DNA replication (GO:0006261);; Biological Process: DNA …	--	--	[P]	Inorganic ion transport and metabolism	Heavy-metal-associated domain	Heavy metal-associated isoprenylated plant protein 37 OS=Arabidopsis thaliana OX=3702 GN=HIPP37 PE=2 SV=1	S	Function unknown	PREDICTED: protein kinase 4 [Oryza sativa Japonica Group]	+	7	1	1407051
LOC_OS02G01010	--	--	Cellular Component: protein storage vacuole (GO:0000326);; Molecular Function: protein disulfide isomerase activity (GO:0003756);; Cellular Component: extracellular region (GO:0005576);; Cellular Component: mitochondrion (GO:0005739);; Cellular Component: vacuolar membrane (GO:0005774);; Cellular Component: endoplasmic reticulum lumen (GO:0005788);; Cellular Component: Golgi apparatus (GO:0005794…	K09580|0|osa:4327971|Os02g0100100; K09580 protein disulfide-isomerase A1 [EC:5.3.4.1] (A)	ko04141:Protein processing in endoplasmic reticulum	[O]	Posttranslational modification, protein turnover, chaperones	Thioredoxin;; Thioredoxin-like domain;; Thioredoxin-like;; Thioredoxin-like domain;; Thioredoxin-like;; OST3 / OST6 family, transporter family;; AhpC/TSA family	Protein disulfide isomerase-like 1-4 OS=Oryza sativa subsp. japonica OX=39947 GN=PDIL1-4 PE=2 SV=1	O	Posttranslational modification, protein turnover, chaperones	PREDICTED: protein disulfide isomerase-like 1-4 [Oryza sativa Japonica Group]	-	14	2	36343658
LOC_OS04G38410	--	--	Biological Process: calcium ion transport (GO:0006816);; Biological Process: Golgi organization (GO:0007030);; Biological Process: response to light stimulus (GO:0009416);; Cellular Component: photosystem II (GO:0009523);; Cellular Component: chloroplast thylakoid membrane (GO:0009535);; Biological Process: response to salt stress (GO:0009651);; Biological Process: photosynthesis, light harvestin…	K08917|4.30655e-170|osa:4336028|Os04g0457000; K08917 light-harvesting complex II chlorophyll a/b binding protein 6 (A)	ko00196:Photosynthesis - antenna proteins	--	--	Chlorophyll A-B binding protein	Chlorophyll a-b binding protein CP24 10A, chloroplastic OS=Solanum lycopersicum OX=4081 GN=CAP10A PE=3 SV=1	S	Function unknown	PREDICTED: chlorophyll a-b binding protein CP24, chloroplastic [Oryza sativa Japonica Group]	-	191	3	2.28359e+23
LOC_OS02G57620	--	--	Molecular Function: binding (GO:0005488);; Biological Process: plant-type cell wall organization (GO:0009664);; Biological Process: pollen tube growth (GO:0009860);; Molecular Function: arsenite transmembrane transporter activity (GO:0015105);; Biological Process: arsenite transport (GO:0015700);; Cellular Component: integral component of membrane (GO:0016021);; Cellular Component: cytoplasmic me…	--	--	[P]	Inorganic ion transport and metabolism	Citrate transporter;; Bacterial Na+/H+ antiporter B (NhaB)	Silicon efflux transporter LSI3 OS=Oryza sativa subsp. japonica OX=39947 GN=LSI3 PE=2 SV=1	P	Inorganic ion transport and metabolism	PREDICTED: putative transporter arsB [Oryza sativa Japonica Group]	+	27	3	3.52907e+23
LOC_OS04G44510	--	--	Molecular Function: protein binding (GO:0005515);; Cellular Component: cytosol (GO:0005829);; Cellular Component: chloroplast (GO:0009507);; Biological Process: trichome differentiation (GO:0010026);; Biological Process: regulation of epidermal cell division (GO:0010482);; Biological Process: single-organism transport (GO:0044765);; Biological Process: intracellular transport (GO:0046907);; Biolo…	--	--	--	--	GRAM domain	GEM-like protein 4 OS=Arabidopsis thaliana OX=3702 GN=At5g08350 PE=2 SV=1	S	Function unknown	PREDICTED: GEM-like protein 4 [Oryza sativa Japonica Group]	-	24	2	2634732126347300
LOC_OS07G08040	--	--	Molecular Function: binding (GO:0005488);; Cellular Component: mitochondrion (GO:0005739);; Cellular Component: plastid (GO:0009536);; Cellular Component: intracellular membrane-bounded organelle (GO:0043231);;	--	--	--	--	--	--	--	--	Os07g0177000 [Oryza sativa Japonica Group]	-	6	1	4072944
LOC_OS06G10890	--	--	Cellular Component: peroxisome (GO:0005777);; Biological Process: fatty acid beta-oxidation (GO:0006635);; Biological Process: peroxisome organization (GO:0007031);; Biological Process: gibberellin biosynthetic process (GO:0009686);; Biological Process: gibberellic acid mediated signaling pathway (GO:0009740);; Biological Process: seed germination (GO:0009845);; Cellular Component: cytoplasmic me…	--	--	[I]	Lipid transport and metabolism	SCP-2 sterol transfer family	--	S	Function unknown	PREDICTED: non-specific lipid-transfer protein-like 1 [Oryza sativa Japonica Group]	+	30	3	5.68996e+20
LOC_OS03G58780	--	--	Molecular Function: binding (GO:0005488);; Cellular Component: mitochondrion (GO:0005739);; Biological Process: regulation of transcription, DNA-templated (GO:0006355);; Biological Process: defense response (GO:0006952);; Biological Process: response to red or far red light (GO:0009639);; Biological Process: hormone-mediated signaling pathway (GO:0009755);; Biological Process: embryo development …	--	--	--	--	--	--	S	Function unknown	unknow protein [Oryza sativa Japonica Group]	-	7	1	33474402
LOC_OS04G56630	--	--	Biological Process: cell morphogenesis (GO:0000902);; Cellular Component: plant-type cell wall (GO:0009505);; Biological Process: tissue development (GO:0009888);; Biological Process: xylem and phloem pattern formation (GO:0010051);; Biological Process: cell growth (GO:0016049);; Biological Process: cell development (GO:0048468);; Biological Process: system development (GO:0048731);; Biological P…	--	--	--	--	Arginine/serine-rich protein PNISR	--	S	Function unknown	PREDICTED: protein SON [Oryza sativa Japonica Group]	-	2	1	33765026
LOC_OS10G32550	--	--	Molecular Function: copper ion binding (GO:0005507);; Molecular Function: ATP binding (GO:0005524);; Cellular Component: nucleolus (GO:0005730);; Cellular Component: mitochondrion (GO:0005739);; Cellular Component: mitochondrial matrix (GO:0005759);; Cellular Component: vacuolar membrane (GO:0005774);; Cellular Component: Golgi apparatus (GO:0005794);; Cellular Component: plasma membrane (GO:0005…	K04077|0|osa:4348824|Os10g0462900; K04077 chaperonin GroEL (A)	ko03018:RNA degradation	[O]	Posttranslational modification, protein turnover, chaperones	TCP-1/cpn60 chaperonin family	Chaperonin CPN60-2, mitochondrial OS=Zea mays OX=4577 GN=CPN60II PE=2 SV=1	O	Posttranslational modification, protein turnover, chaperones	PREDICTED: chaperonin CPN60-2, mitochondrial [Oryza sativa Japonica Group]	+	66	5	1.70534e+39
LOC_OS02G50130	--	--	Cellular Component: mitochondrion (GO:0005739);; Cellular Component: cytosol (GO:0005829);; Cellular Component: chloroplast (GO:0009507);; Biological Process: response to chitin (GO:0010200);; Molecular Function: hydrolase activity (GO:0016787);; Molecular Function: bis(5'-adenosyl)-pentaphosphatase activity (GO:0034432);;	--	--	[T]	Signal transduction mechanisms	NUDIX domain	Nudix hydrolase 21, chloroplastic OS=Arabidopsis thaliana OX=3702 GN=NUDT21 PE=2 SV=1	L	Replication, recombination and repair	PREDICTED: nudix hydrolase 21, chloroplastic [Oryza sativa Japonica Group]	+	2	1	30626787
LOC_OS02G43020	--	--	Molecular Function: phosphoprotein phosphatase activity (GO:0004721);; Molecular Function: protein binding (GO:0005515);; Cellular Component: nucleus (GO:0005634);; Cellular Component: nuclear envelope (GO:0005635);; Cellular Component: endoplasmic reticulum membrane (GO:0005789);; Cellular Component: cytosol (GO:0005829);; Cellular Component: plasma membrane (GO:0005886);; Biological Process: pr…	K09553|0|osa:4330134|Os02g0644100; K09553 stress-induced-phosphoprotein 1 (A)	--	[O]	Posttranslational modification, protein turnover, chaperones	Tetratricopeptide repeat;; Tetratricopeptide repeat;; TPR repeat;; Tetratricopeptide repeat;; Tetratricopeptide repeat;; Tetratricopeptide repeat;; Tetratricopeptide repeat;; Tetratricopeptide repeat;; Tetratricopeptide repeat;; Tetratricopeptide repeat;; Tetratricopeptide repeat;; Tetratricopeptide repeat;; Bacterial transcriptional activator domain	Hsp70-Hsp90 organizing protein 1 OS=Glycine max OX=3847 GN=HOP1 PE=1 SV=2	S	Function unknown	PREDICTED: hsp70-Hsp90 organizing protein [Oryza sativa Japonica Group]	+	32	1	25899874
LOC_OS03G63450	--	--	Cellular Component: chloroplast (GO:0009507);;	--	--	--	--	--	DNA repair RAD52-like protein 2, chloroplastic OS=Arabidopsis thaliana OX=3702 GN=RAD52-2 PE=1 SV=1	S	Function unknown	PREDICTED: uncharacterized protein LOC4334803 isoform X1 [Oryza sativa Japonica Group]	+	2	1	35854055
LOC_OS07G30100	--	--	Molecular Function: ubiquitin-protein transferase activity (GO:0004842);; Molecular Function: protein binding (GO:0005515);; Cellular Component: plasma membrane (GO:0005886);; Molecular Function: zinc ion binding (GO:0008270);; Biological Process: response to abiotic stimulus (GO:0009628);; Biological Process: protein ubiquitination (GO:0016567);; Biological Process: positive regulation of plant-…	K10636|0|osa:4343241|Os07g0484300; K10636 autocrine motility factor receptor [EC:6.3.2.19] (A)	ko04141:Protein processing in endoplasmic reticulum	[O]	Posttranslational modification, protein turnover, chaperones	CUE domain;; Ring finger domain;; Zinc finger, C3HC4 type (RING finger);; Anaphase-promoting complex subunit 11 RING-H2 finger	E3 ubiquitin protein ligase RIN2 OS=Arabidopsis thaliana OX=3702 GN=RIN2 PE=1 SV=1	O	Posttranslational modification, protein turnover, chaperones	PREDICTED: E3 ubiquitin protein ligase RIN2 [Oryza sativa Japonica Group]	-	5	2	1774421817744240
LOC_OS05G03040	--	--	Molecular Function: sequence-specific DNA binding RNA polymerase II transcription factor activity (GO:0000981);; Molecular Function: DNA binding (GO:0003677);; Molecular Function: sequence-specific DNA binding transcription factor activity (GO:0003700);; Cellular Component: nucleus (GO:0005634);; Cellular Component: nucleolus (GO:0005730);; Biological Process: regulation of glycolytic process (GO…	--	--	--	--	AP2 domain	Floral homeotic protein APETALA 2 OS=Arabidopsis thaliana OX=3702 GN=AP2 PE=1 SV=1	K	Transcription	PREDICTED: AP2-like ethylene-responsive transcription factor TOE3 isoform X1 [Oryza sativa Japonica Group]	-	4	1	1156099
LOC_OS11G26130	--	--	Molecular Function: protein serine/threonine kinase activity (GO:0004674);; Molecular Function: transmembrane receptor protein serine/threonine kinase activity (GO:0004675);; Molecular Function: protein binding (GO:0005515);; Molecular Function: ATP binding (GO:0005524);; Cellular Component: plasma membrane (GO:0005886);; Biological Process: polysaccharide metabolic process (GO:0005976);; Biologi…	--	--	--	--	Protein kinase domain;; Protein tyrosine kinase;; Leucine rich repeat;; Leucine Rich repeats (2 copies);; Leucine rich repeat N-terminal domain	Receptor protein kinase TMK1 OS=Arabidopsis thaliana OX=3702 GN=TMK1 PE=1 SV=1	T	Signal transduction mechanisms	PREDICTED: receptor protein kinase TMK1 [Oryza sativa Japonica Group]	+	5	1	14968364
LOC_OS04G47260	--	--	Molecular Function: protein binding (GO:0005515);; Biological Process: glycerol ether metabolic process (GO:0006662);; Biological Process: response to stress (GO:0006950);; Molecular Function: electron carrier activity (GO:0009055);; Biological Process: response to temperature stimulus (GO:0009266);; Cellular Component: plastid (GO:0009536);; Molecular Function: protein disulfide oxidoreductase a…	K03671|3.65778e-93|osa:4336649|Os04g0560200; K03671 thioredoxin 1 (A)	--	--	--	Thioredoxin	Thioredoxin-like 3-3 OS=Oryza sativa subsp. japonica OX=39947 GN=Os04g0560200 PE=2 SV=2	O	Posttranslational modification, protein turnover, chaperones	PREDICTED: thioredoxin-like 3-3 [Oryza sativa Japonica Group]	+	4	1	28066891
LOC_OS03G11380	--	--	Biological Process: MAPK cascade (GO:0000165);; Biological Process: cytokinesis by cell plate formation (GO:0000911);; Biological Process: respiratory burst involved in defense response (GO:0002679);; Molecular Function: SNAP receptor activity (GO:0005484);; Cellular Component: nucleus (GO:0005634);; Cellular Component: plasma membrane (GO:0005886);; Biological Process: N-terminal protein myristo…	--	--	[U]	Intracellular trafficking, secretion, and vesicular transport	--	SNAP25 homologous protein SNAP33 OS=Arabidopsis thaliana OX=3702 GN=SNAP33 PE=1 SV=1	U	Intracellular trafficking, secretion, and vesicular transport	PREDICTED: SNAP25 homologous protein SNAP33 [Oryza sativa Japonica Group]	+	2	1	5863888
LOC_OS09G06230	--	--	Molecular Function: protein serine/threonine kinase activity (GO:0004674);; Molecular Function: binding (GO:0005488);; Molecular Function: ATP binding (GO:0005524);; Cellular Component: cytosol (GO:0005829);; Biological Process: DNA replication (GO:0006260);; Biological Process: protein phosphorylation (GO:0006468);; Biological Process: response to stress (GO:0006950);; Biological Process: cytosk…	--	--	[KIT]	--	Protein kinase domain;; Protein tyrosine kinase	Mitogen-activated protein kinase kinase kinase ANP1 OS=Arabidopsis thaliana OX=3702 GN=ANP1 PE=1 SV=2	T	Signal transduction mechanisms	PREDICTED: serine/threonine-protein kinase 16 [Oryza sativa Japonica Group]	-	10	2	29148442914790
LOC_OS01G59910	--	--	Molecular Function: catalytic activity (GO:0003824);; Molecular Function: binding (GO:0005488);; Cellular Component: cell wall (GO:0005618);; Cellular Component: membrane (GO:0016020);; Biological Process: cellular component organization (GO:0016043);; Biological Process: macromolecule metabolic process (GO:0043170);; Biological Process: primary metabolic process (GO:0044238);; Biological Process…	--	--	--	--	F-box-like	F-box protein SKIP24 OS=Arabidopsis thaliana OX=3702 GN=SKIP24 PE=1 SV=2	S	Function unknown	PREDICTED: F-box protein SKIP24 isoform X1 [Oryza sativa Japonica Group]	-	5	2	3464326134643300
LOC_OS06G09910	--	--	Molecular Function: phosphopantothenoylcysteine decarboxylase activity (GO:0004633);; Cellular Component: cytosol (GO:0005829);; Molecular Function: FMN binding (GO:0010181);; Biological Process: coenzyme A biosynthetic process (GO:0015937);; Biological Process: hyperosmotic salinity response (GO:0042538);;	K01598|1.06815e-160|osa:4340408|Os06g0199500; K01598 phosphopantothenoylcysteine decarboxylase [EC:4.1.1.36] (A)	ko00770:Pantothenate and CoA biosynthesis	[PD]	--	Flavoprotein	Phosphopantothenoylcysteine decarboxylase OS=Oryza sativa subsp. japonica OX=39947 GN=HAL3 PE=1 SV=1	H	Coenzyme transport and metabolism	PREDICTED: phosphopantothenoylcysteine decarboxylase [Oryza sativa Japonica Group]	-	7	2	50549465054970
LOC_OS07G47500	--	--	Cellular Component: nucleus (GO:0005634);; Cellular Component: cytoplasm (GO:0005737);; Cellular Component: cytosol (GO:0005829);; Biological Process: regulation of transcription, DNA-templated (GO:0006355);; Biological Process: mRNA export from nucleus (GO:0006406);; Molecular Function: histone-arginine N-methyltransferase activity (GO:0008469);; Cellular Component: chloroplast (GO:0009507);; Bi…	K05931|0|osa:4344248|Os07g0671700; K05931 histone-arginine methyltransferase CARM1 [EC:2.1.1.125] (A)	--	[OK]	--	Ribosomal protein L11 methyltransferase (PrmA);; Methyltransferase domain;; Methyltransferase domain;; Methyltransferase small domain	Probable histone-arginine methyltransferase CARM1 OS=Oryza sativa subsp. japonica OX=39947 GN=CARM1 PE=2 SV=1	K	Transcription	PREDICTED: probable histone-arginine methyltransferase CARM1 isoform X1 [Oryza sativa Japonica Group]	+	10	1	28409555
LOC_OS02G21970	--	--	Molecular Function: signal transducer activity (GO:0004871);; Molecular Function: protein binding (GO:0005515);; Molecular Function: ATP binding (GO:0005524);; Cellular Component: cell wall (GO:0005618);; Cellular Component: nucleus (GO:0005634);; Cellular Component: nucleolus (GO:0005730);; Cellular Component: cytosol (GO:0005829);; Cellular Component: plasma membrane (GO:0005886);; Biological P…	K03063|0|obr:102716008|26S protease regulatory subunit 6B homolog; K03063 26S proteasome regulatory subunit T3 (A)	ko03050:Proteasome	[O]	Posttranslational modification, protein turnover, chaperones	ATPase family associated with various cellular activities (AAA);; AAA domain (dynein-related subfamily);; AAA domain (Cdc48 subfamily);; Holliday junction DNA helicase ruvB N-terminus	26S proteasome regulatory subunit 6B homolog OS=Arabidopsis thaliana OX=3702 GN=RPT3 PE=1 SV=1	O	Posttranslational modification, protein turnover, chaperones	PREDICTED: 26S protease regulatory subunit 6B homolog [Oryza brachyantha]	+	13	3	1.30637e+23
LOC_OS06G40360	--	--	Molecular Function: protein binding (GO:0005515);; Cellular Component: nucleus (GO:0005634);; Cellular Component: mitochondrion (GO:0005739);; Biological Process: ubiquitin-dependent protein catabolic process (GO:0006511);; Biological Process: response to ethylene (GO:0009723);; Biological Process: negative regulation of ethylene-activated signaling pathway (GO:0010105);; Cellular Component: SCF …	--	--	[R]	General function prediction only	Leucine Rich repeats (2 copies);; Leucine Rich repeat	EIN3-binding F-box protein 1 OS=Arabidopsis thaliana OX=3702 GN=EBF1 PE=1 SV=1	S	Function unknown	PREDICTED: EIN3-binding F-box protein 1 [Oryza sativa Japonica Group]	+	2	1	24036785
LOC_OS09G29080	--	--	Cellular Component: chloroplast thylakoid membrane (GO:0009535);; Cellular Component: chloroplast envelope (GO:0009941);; Cellular Component: plastoglobule (GO:0010287);; Biological Process: cellular metabolic process (GO:0044237);; Biological Process: cellular component organization or biogenesis (GO:0071840);;	--	--	--	--	CAAD domains of cyanobacterial aminoacyl-tRNA synthetase	Protein CURVATURE THYLAKOID 1D, chloroplastic OS=Arabidopsis thaliana OX=3702 GN=CURT1D PE=1 SV=1	S	Function unknown	PREDICTED: protein CURVATURE THYLAKOID 1D, chloroplastic [Oryza sativa Japonica Group]	-	5	1	17659865
LOC_OS05G34540	--	--	Molecular Function: Rab GDP-dissociation inhibitor activity (GO:0005093);; Cellular Component: cytosol (GO:0005829);; Biological Process: protein N-linked glycosylation (GO:0006487);; Biological Process: N-terminal protein myristoylation (GO:0006499);; Biological Process: protein targeting to vacuole (GO:0006623);; Cellular Component: plasmodesma (GO:0009506);; Biological Process: vegetative to r…	K17255|0|osa:4338812|Os05g0418000; K17255 Rab GDP dissociation inhibitor (A)	--	[O]	Posttranslational modification, protein turnover, chaperones	GDP dissociation inhibitor	Guanosine nucleotide diphosphate dissociation inhibitor 1 OS=Arabidopsis thaliana OX=3702 GN=GDI1 PE=1 SV=1	O	Posttranslational modification, protein turnover, chaperones	PREDICTED: guanosine nucleotide diphosphate dissociation inhibitor 2 [Oryza sativa Japonica Group]	+	20	1	20483599
LOC_OS03G14120	--	--	Cellular Component: mitochondrion (GO:0005739);; Molecular Function: 4-hydroxy-tetrahydrodipicolinate reductase (GO:0008839);; Biological Process: lysine biosynthetic process via diaminopimelate (GO:0009089);; Cellular Component: chloroplast (GO:0009507);; Biological Process: diaminopimelate biosynthetic process (GO:0019877);; Biological Process: oxidation-reduction process (GO:0055114);; Molecul…	K00215|0|osa:4332231|Os03g0245100; K00215 4-hydroxy-tetrahydrodipicolinate reductase [EC:1.17.1.8] (A)	ko00300:Lysine biosynthesis;ko01230:Biosynthesis of amino acids	--	--	Dihydrodipicolinate reductase, C-terminus;; Dihydrodipicolinate reductase, N-terminus	Probable 4-hydroxy-tetrahydrodipicolinate reductase 2, chloroplastic OS=Oryza sativa subsp. japonica OX=39947 GN=DAPB2 PE=2 SV=1	E	Amino acid transport and metabolism	PREDICTED: probable 4-hydroxy-tetrahydrodipicolinate reductase 2, chloroplastic [Oryza sativa Japonica Group]	+	4	1	7675523
LOC_OS01G42970	--	--	Biological Process: cell fate determination (GO:0001709);; Molecular Function: DNA binding (GO:0003677);; Molecular Function: RNA binding (GO:0003723);; Cellular Component: nucleus (GO:0005634);; Biological Process: regulation of transcription, DNA-templated (GO:0006355);; Molecular Function: zinc ion binding (GO:0008270);;	--	--	[R]	General function prediction only	Zinc finger C-x8-C-x5-C-x3-H type (and similar);; RNA-binding, Nab2-type zinc finger	Zinc finger CCCH domain-containing protein 8 OS=Oryza sativa subsp. japonica OX=39947 GN=Os01g0616400 PE=2 SV=2	S	Function unknown	PREDICTED: zinc finger CCCH domain-containing protein 8 isoform X1 [Oryza sativa Japonica Group]	-	2	1	24471930
LOC_OS01G35184	--	--	Biological Process: cytokinesis by cell plate formation (GO:0000911);; Molecular Function: protein serine/threonine kinase activity (GO:0004674);; Molecular Function: protein tyrosine kinase activity (GO:0004713);; Molecular Function: ATP binding (GO:0005524);; Cellular Component: nucleus (GO:0005634);; Cellular Component: mitochondrion (GO:0005739);; Cellular Component: cytosol (GO:0005829);; Ce…	--	--	[T]	Signal transduction mechanisms	Protein kinase domain;; Protein tyrosine kinase;; NAF domain;; Kinase-like	CBL-interacting protein kinase 8 OS=Oryza sativa subsp. japonica OX=39947 GN=CIPK8 PE=2 SV=1	T	Signal transduction mechanisms	PREDICTED: CBL-interacting protein kinase 8 isoform X1 [Oryza sativa Japonica Group]	-	5	1	19469343
LOC_OS04G01490	--	--	Molecular Function: zinc ion binding (GO:0008270);; Cellular Component: membrane (GO:0016020);;	--	--	[A]	RNA processing and modification	RING-variant domain	Probable E3 ubiquitin ligase SUD1 OS=Arabidopsis thaliana OX=3702 GN=SUD1 PE=1 SV=1	O	Posttranslational modification, protein turnover, chaperones	PREDICTED: uncharacterized protein LOC4334905 [Oryza sativa Japonica Group]	+	3	1	337075
LOC_OS01G70670	--	--	Molecular Function: protein binding (GO:0005515);; Cellular Component: cell wall (GO:0005618);; Cellular Component: membrane (GO:0016020);; Molecular Function: hydrolase activity (GO:0016787);; Cellular Component: intracellular organelle (GO:0043229);;	--	--	--	--	BTB/POZ domain	--	S	Function unknown	PREDICTED: uncharacterized protein LOC4326821 isoform X1 [Oryza sativa Japonica Group]	+	18	3	4.09206e+23
LOC_OS04G54474	--	--	Biological Process: MAPK cascade (GO:0000165);; Molecular Function: DNA binding (GO:0003677);; Molecular Function: sequence-specific DNA binding transcription factor activity (GO:0003700);; Molecular Function: calmodulin binding (GO:0005516);; Cellular Component: nucleus (GO:0005634);; Cellular Component: cytoplasm (GO:0005737);; Biological Process: regulation of transcription, DNA-templated (GO:…	K14431|0|dosa:Os04t0637000-01|Os04g0637000; Similar to BZIP transcription factor bZIP52.; K14431 transcription factor TGA (A)	ko04075:Plant hormone signal transduction	--	--	Seed dormancy control;; bZIP transcription factor;; Basic region leucine zipper	Transcription factor TGAL6 OS=Oryza sativa subsp. japonica OX=39947 GN=TGAL6 PE=2 SV=1	K	Transcription	PREDICTED: transcription factor TGA4 isoform X2 [Oryza sativa Japonica Group]	+	6	2	3241205632411850
LOC_OS01G13280	--	--	Molecular Function: protein binding (GO:0005515);; Cellular Component: cytosol (GO:0005829);; Biological Process: postreplication repair (GO:0006301);; Biological Process: ubiquitin-dependent protein catabolic process (GO:0006511);; Biological Process: protein targeting (GO:0006605);; Biological Process: phosphate ion transport (GO:0006817);; Biological Process: photomorphogenesis (GO:0009640);; …	K10581|0|dosa:Os01t0233900-01|Os01g0233900; Similar to cDNA clone:J013003E06, full insert sequence.; K10581 ubiquitin-conjugating enzyme E2 O [EC:6.3.2.19] (A)	ko04120:Ubiquitin mediated proteolysis	[O]	Posttranslational modification, protein turnover, chaperones	Ubiquitin-conjugating enzyme	Probable ubiquitin-conjugating enzyme E2 25 OS=Arabidopsis thaliana OX=3702 GN=UBC25 PE=2 SV=1	O	Posttranslational modification, protein turnover, chaperones	Os01g0233900, partial [Oryza sativa Japonica Group]	-	7	1	7404925
LOC_OS07G48060	--	--	Molecular Function: peroxidase activity (GO:0004601);; Molecular Function: protein binding (GO:0005515);; Cellular Component: cell wall (GO:0005618);; Cellular Component: vacuole (GO:0005773);; Cellular Component: Golgi apparatus (GO:0005794);; Cellular Component: cytosol (GO:0005829);; Biological Process: response to oxidative stress (GO:0006979);; Biological Process: indoleacetic acid biosynthe…	--	--	--	--	Peroxidase	Cationic peroxidase 1 OS=Arachis hypogaea OX=3818 GN=PNC1 PE=1 SV=2	S	Function unknown	hypothetical protein OsI_27331 [Oryza sativa Indica Group]	-	6	1	28690642
LOC_OS01G61380	--	--	Biological Process: sulfur amino acid metabolic process (GO:0000096);; Biological Process: MAPK cascade (GO:0000165);; Molecular Function: copper ion binding (GO:0005507);; Cellular Component: cell wall (GO:0005618);; Cellular Component: mitochondrion (GO:0005739);; Cellular Component: vacuolar membrane (GO:0005774);; Cellular Component: peroxisome (GO:0005777);; Cellular Component: Golgi apparat…	K00026|0|osa:4327423|Os01g0829800; K00026 malate dehydrogenase [EC:1.1.1.37] (A)	ko00020:Citrate cycle (TCA cycle);ko00270:Cysteine and methionine metabolism;ko00620:Pyruvate metabolism;ko00630:Glyoxylate and dicarboxylate metabolism;ko00710:Carbon fixation in photosynthetic organisms;ko01200:Carbon metabolism	[C]	Energy production and conversion	lactate/malate dehydrogenase, NAD binding domain;; lactate/malate dehydrogenase, alpha/beta C-terminal domain;; 3-beta hydroxysteroid dehydrogenase/isomerase family	Malate dehydrogenase, chloroplastic OS=Arabidopsis thaliana OX=3702 GN=At3g47520 PE=1 SV=1	C	Energy production and conversion	PREDICTED: malate dehydrogenase, chloroplastic [Oryza sativa Japonica Group]	+	9	1	35501744
LOC_OS09G38130	--	--	Cellular Component: integral component of membrane (GO:0016021);; Cellular Component: cytoplasmic membrane-bounded vesicle (GO:0016023);; Biological Process: transmembrane transport (GO:0055085);;	K07088|0|osa:4347808|Os09g0554300; K07088 (A)	--	[S]	Function unknown	Membrane transport protein	Protein PIN-LIKES 7 OS=Arabidopsis thaliana OX=3702 GN=PILS7 PE=2 SV=1	S	Function unknown	PREDICTED: uncharacterized protein LOC4347808 [Oryza sativa Japonica Group]	+	3	1	21967859
LOC_OS03G27010	--	--	Cellular Component: nucleus (GO:0005634);; Cellular Component: cytoplasm (GO:0005737);;	--	--	--	--	Protein of unknown function (DUF4057)	--	S	Function unknown	PREDICTED: uncharacterized protein LOC4333003 [Oryza sativa Japonica Group]	+	15	2	1546309015463110
LOC_OS06G04270	--	--	Molecular Function: transketolase activity (GO:0004802);; Cellular Component: cytosol (GO:0005829);; Biological Process: gluconeogenesis (GO:0006094);; Biological Process: glycolytic process (GO:0006096);; Biological Process: calcium ion transport (GO:0006816);; Biological Process: water transport (GO:0006833);; Biological Process: hyperosmotic response (GO:0006972);; Biological Process: Golgi or…	K00615|0|osa:4340025|Os06g0133800; K00615 transketolase [EC:2.2.1.1] (A)	ko00030:Pentose phosphate pathway;ko00710:Carbon fixation in photosynthetic organisms;ko01200:Carbon metabolism;ko01230:Biosynthesis of amino acids	[G]	Carbohydrate transport and metabolism	Transketolase, thiamine diphosphate binding domain;; Transketolase, pyrimidine binding domain;; Transketolase, C-terminal domain	Transketolase, chloroplastic OS=Zea mays OX=4577 PE=1 SV=1	G	Carbohydrate transport and metabolism	PREDICTED: transketolase, chloroplastic [Oryza sativa Japonica Group]	-	34	3	1.80894e+20
LOC_OS06G43120	--	--	Molecular Function: nucleic acid binding (GO:0003676);; Molecular Function: zinc ion binding (GO:0008270);; Cellular Component: cell part (GO:0044464);;	--	--	[R]	General function prediction only	--	Zinc finger CCCH domain-containing protein 7 OS=Arabidopsis thaliana OX=3702 GN=At1g21570 PE=1 SV=1	S	Function unknown	PREDICTED: uncharacterized protein LOC4341610 isoform X2 [Oryza sativa Japonica Group]	+	5	1	25927829
LOC_OS03G19960	--	--	Molecular Function: nucleic acid binding (GO:0003676);; Molecular Function: RNA helicase activity (GO:0003724);; Molecular Function: ATP binding (GO:0005524);; Cellular Component: nucleus (GO:0005634);; Cellular Component: nucleolus (GO:0005730);; Cellular Component: cytosol (GO:0005829);; Molecular Function: ATP-dependent helicase activity (GO:0008026);; Cellular Component: chloroplast envelope …	K12820|0|osa:4332645|Os03g0314100; K12820 pre-mRNA-splicing factor ATP-dependent RNA helicase DHX15/PRP43 [EC:3.6.4.13] (A)	ko03040:Spliceosome	[A]	RNA processing and modification	Helicase associated domain (HA2);; Oligonucleotide/oligosaccharide-binding (OB)-fold;; Helicase conserved C-terminal domain;; AAA domain;; DEAD/DEAH box helicase	Probable pre-mRNA-splicing factor ATP-dependent RNA helicase DEAH3 OS=Arabidopsis thaliana OX=3702 GN=At2g47250 PE=2 SV=1	L	Replication, recombination and repair	PREDICTED: probable pre-mRNA-splicing factor ATP-dependent RNA helicase DEAH3 isoform X1 [Oryza sativa Japonica Group]	+	9	1	11241416
LOC_OS05G39390	--	--	Biological Process: defense response to insect (GO:0002213);; Molecular Function: chitinase activity (GO:0004568);; Molecular Function: protein binding (GO:0005515);; Cellular Component: extracellular region (GO:0005576);; Cellular Component: cell wall (GO:0005618);; Cellular Component: nucleus (GO:0005634);; Cellular Component: mitochondrion (GO:0005739);; Biological Process: chitin catabolic pr…	K07277|0|osa:4339073|Os05g0470800; K07277 outer membrane protein insertion porin family (A)	--	[R]	General function prediction only	Surface antigen;; Surface antigen variable number repeat	--	M	Cell wall/membrane/envelope biogenesis	PREDICTED: sorting and assembly machinery component 50 homolog A [Oryza sativa Japonica Group]	-	7	2	2310556923105590
LOC_OS05G40900	--	--	Biological Process: defense response to insect (GO:0002213);; Molecular Function: chitinase activity (GO:0004568);; Cellular Component: extracellular region (GO:0005576);; Cellular Component: mitochondrion (GO:0005739);; Biological Process: chitin catabolic process (GO:0006032);; Biological Process: response to abiotic stimulus (GO:0009628);; Biological Process: anatomical structure morphogenesis…	--	--	--	--	--	--	--	--	unknown protein [Oryza sativa Japonica Group]	-	4	1	23991105
LOC_OS07G27950	--	--	Molecular Function: ubiquitin-protein transferase activity (GO:0004842);; Cellular Component: extracellular region (GO:0005576);; Cellular Component: nucleus (GO:0005634);; Cellular Component: vacuolar membrane (GO:0005774);; Cellular Component: plasma membrane (GO:0005886);; Molecular Function: zinc ion binding (GO:0008270);; Cellular Component: chloroplast (GO:0009507);; Cellular Component: pla…	--	--	[O]	Posttranslational modification, protein turnover, chaperones	Ring finger domain;; RING-like zinc finger;; Zinc finger, C3HC4 type (RING finger)	E3 ubiquitin-protein ligase At4g11680 OS=Arabidopsis thaliana OX=3702 GN=At4g11680 PE=2 SV=1	O	Posttranslational modification, protein turnover, chaperones	PREDICTED: E3 ubiquitin-protein ligase At1g12760 isoform X1 [Oryza sativa Japonica Group]	+	9	2	1630733816307370
LOC_OS05G51650	--	--	Biological Process: response to molecule of bacterial origin (GO:0002237);; Molecular Function: protein binding (GO:0005515);; Cellular Component: nucleus (GO:0005634);; Cellular Component: small nucleolar ribonucleoprotein complex (GO:0005732);; Cellular Component: cytosol (GO:0005829);; Biological Process: protein targeting to mitochondrion (GO:0006626);; Biological Process: signal transduction…	K12627|1.08981e-56|osa:4339810|Os05g0594900; K12627 U6 snRNA-associated Sm-like protein LSm8 (A)	ko03018:RNA degradation;ko03040:Spliceosome	[A]	RNA processing and modification	LSM domain	Sm-like protein LSM8 OS=Arabidopsis thaliana OX=3702 GN=LSM8 PE=1 SV=1	K	Transcription	hypothetical protein OsI_21233 [Oryza sativa Indica Group]	+	4	1	29625064
LOC_OS01G70160	--	--	Molecular Function: ubiquitin-protein transferase activity (GO:0004842);; Molecular Function: protein binding (GO:0005515);; Cellular Component: plasma membrane (GO:0005886);; Biological Process: protein targeting (GO:0006605);; Molecular Function: zinc ion binding (GO:0008270);; Biological Process: megagametogenesis (GO:0009561);; Biological Process: systemic acquired resistance (GO:0009627);; B…	--	--	[O]	Posttranslational modification, protein turnover, chaperones	RING-H2 zinc finger domain;; Ring finger domain;; Anaphase-promoting complex subunit 11 RING-H2 finger;; Zinc finger, C3HC4 type (RING finger);; RING-like zinc finger;; RING-type zinc-finger;; Zinc finger, C3HC4 type (RING finger)	E3 ubiquitin-protein ligase At3g02290 OS=Arabidopsis thaliana OX=3702 GN=At3g02290 PE=2 SV=1	O	Posttranslational modification, protein turnover, chaperones	PREDICTED: E3 ubiquitin-protein ligase At3g02290 [Oryza sativa Japonica Group]	+	7	1	40610259
LOC_OS08G29530	--	--	Molecular Function: RNA binding (GO:0003723);; Molecular Function: double-stranded RNA binding (GO:0003725);; Cellular Component: nucleus (GO:0005634);; Cellular Component: cytoplasm (GO:0005737);; Biological Process: response to hormone (GO:0009725);; Biological Process: response to auxin (GO:0009733);; Biological Process: response to cytokinin (GO:0009735);; Biological Process: response to absc…	--	--	--	--	Double-stranded RNA binding motif	Double-stranded RNA-binding protein 4 OS=Oryza sativa subsp. japonica OX=39947 GN=DRB4 PE=2 SV=1	S	Function unknown	PREDICTED: double-stranded RNA-binding protein 4 [Oryza sativa Japonica Group]	-	5	1	18103293
LOC_OS02G48190	--	--	Cellular Component: membrane (GO:0016020);; Cellular Component: intracellular membrane-bounded organelle (GO:0043231);;	--	--	[S]	Function unknown	Glycosyltransferase family 92;; Glycosyl transferase family 2	Galactan beta-1,4-galactosyltransferase GALS1 OS=Arabidopsis thaliana OX=3702 GN=GALS1 PE=2 SV=2	S	Function unknown	PREDICTED: uncharacterized protein LOC4330501 [Oryza sativa Japonica Group]	-	9	1	29502650
LOC_OS02G48660	--	--	Molecular Function: structural constituent of ribosome (GO:0003735);; Cellular Component: cell wall (GO:0005618);; Cellular Component: plasma membrane (GO:0005886);; Biological Process: translation (GO:0006412);; Cellular Component: chloroplast (GO:0009507);; Cellular Component: cytosolic large ribosomal subunit (GO:0022625);; Biological Process: ribosome biogenesis (GO:0042254);;	K02910|5.85093e-69|osa:4330533|Os02g0717800; K02910 large subunit ribosomal protein L31e (A)	ko03010:Ribosome	[J]	Translation, ribosomal structure and biogenesis	Ribosomal protein L31e	60S ribosomal protein L31 OS=Nicotiana glutinosa OX=35889 GN=RPL31 PE=2 SV=1	J	Translation, ribosomal structure and biogenesis	PREDICTED: 60S ribosomal protein L31 [Oryza sativa Japonica Group]	-	14	4	2.97955e+31
LOC_OS01G67950	--	--	Cellular Component: mitochondrion (GO:0005739);; Cellular Component: cytosol (GO:0005829);; Biological Process: response to heat (GO:0009408);; Biological Process: response to cold (GO:0009409);; Cellular Component: plastid (GO:0009536);; Biological Process: response to salt stress (GO:0009651);; Biological Process: vegetative to reproductive phase transition of meristem (GO:0010228);; Biological…	--	--	--	--	Ubiquitin family	BAG family molecular chaperone regulator 2 OS=Arabidopsis thaliana OX=3702 GN=BAG2 PE=1 SV=1	O	Posttranslational modification, protein turnover, chaperones	PREDICTED: BAG family molecular chaperone regulator 2 [Oryza sativa Japonica Group]	+	14	2	3948478739484800
LOC_OS05G45740	--	--	Cellular Component: mitochondrial proton-transporting ATP synthase complex, coupling factor F(o) (GO:0000276);; Molecular Function: hydrogen ion transmembrane transporter activity (GO:0015078);; Biological Process: ATP synthesis coupled proton transport (GO:0015986);;	K02140|1.32218e-79|osa:4339428|Os05g0533800; K02140 F-type H+-transporting ATPase subunit g (A)	ko00190:Oxidative phosphorylation	--	--	Mitochondrial ATP synthase g subunit	--	I	Lipid transport and metabolism	PREDICTED: uncharacterized protein LOC4339428 isoform X1 [Oryza sativa Japonica Group]	+	5	1	26499609
LOC_OS03G15480	--	--	Biological Process: protein folding (GO:0006457);; Cellular Component: plastid (GO:0009536);; Molecular Function: heat shock protein binding (GO:0031072);;	K09528|4.02509e-144|osa:4332320|Os03g0261500; K09528 DnaJ homolog subfamily C member 8 (A)	--	[O]	Posttranslational modification, protein turnover, chaperones	DnaJ domain	--	O	Posttranslational modification, protein turnover, chaperones	PREDICTED: J domain-containing protein spf31 [Oryza sativa Japonica Group]	+	22	3	8.50562e+20
LOC_OS07G47100	--	--	Biological Process: sodium ion transport (GO:0006814);; Biological Process: regulation of pH (GO:0006885);; Biological Process: response to oxidative stress (GO:0006979);; Molecular Function: sodium:proton antiporter activity (GO:0015385);; Biological Process: monovalent inorganic cation transport (GO:0015672);; Cellular Component: integral component of membrane (GO:0016021);; Biological Process:…	--	--	[P]	Inorganic ion transport and metabolism	Sodium/hydrogen exchanger family	Sodium/hydrogen exchanger 2 OS=Arabidopsis thaliana OX=3702 GN=NHX2 PE=2 SV=2	P	Inorganic ion transport and metabolism	PREDICTED: sodium/hydrogen exchanger 2 [Oryza sativa Japonica Group]	+	10	2	2816930728169240
LOC_OS05G06310	--	--	Molecular Function: structural constituent of ribosome (GO:0003735);; Cellular Component: vacuole (GO:0005773);; Cellular Component: Golgi apparatus (GO:0005794);; Cellular Component: plasma membrane (GO:0005886);; Biological Process: translation (GO:0006412);; Cellular Component: plasmodesma (GO:0009506);; Cellular Component: chloroplast (GO:0009507);; Cellular Component: membrane (GO:0016020);;…	K02883|7.03136e-133|osa:4337849|Os05g0155100; K02883 large subunit ribosomal protein L18e (A)	ko03010:Ribosome	[J]	Translation, ribosomal structure and biogenesis	Ribosomal protein 60S L18 and 50S L18e;; Ribosomal proteins 50S-L15, 50S-L18e, 60S-L27A	60S ribosomal protein L18-3 OS=Arabidopsis thaliana OX=3702 GN=RPL18C PE=2 SV=1	J	Translation, ribosomal structure and biogenesis	PREDICTED: 60S ribosomal protein L18-3 [Oryza sativa Japonica Group]	+	30	5	3.23278e+34
LOC_OS01G42710	--	--	Biological Process: response to hypoxia (GO:0001666);; Biological Process: response to molecule of oomycetes origin (GO:0002240);; Molecular Function: sequence-specific DNA binding transcription factor activity (GO:0003700);; Molecular Function: protein binding (GO:0005515);; Cellular Component: nucleus (GO:0005634);; Biological Process: regulation of transcription, DNA-templated (GO:0006355);; C…	--	--	--	--	LSD1 zinc finger	Protein LOL5 OS=Oryza sativa subsp. japonica OX=39947 GN=LOL5 PE=2 SV=1	S	Function unknown	PREDICTED: fibrous sheath CABYR-binding protein [Oryza sativa Japonica Group]	+	9	1	24299413
LOC_OS01G56000	--	--	Molecular Function: nucleotide binding (GO:0000166);; Molecular Function: nucleic acid binding (GO:0003676);; Cellular Component: plastid (GO:0009536);; Cellular Component: cell periphery (GO:0071944);;	--	--	--	--	SPOC domain;; RNA recognition motif. (a.k.a. RRM, RBD, or RNP domain)	--	S	Function unknown	PREDICTED: uncharacterized protein LOC4326897 [Oryza sativa Japonica Group]	+	7	2	3225003132250120
LOC_OS06G47800	--	--	Molecular Function: protein binding (GO:0005515);; Biological Process: defense response (GO:0006952);; Cellular Component: plastid (GO:0009536);; Cellular Component: cytoplasmic membrane-bounded vesicle (GO:0016023);; Molecular Function: ADP binding (GO:0043531);;	--	--	[T]	Signal transduction mechanisms	NB-ARC domain	Putative disease resistance protein RGA1 OS=Solanum bulbocastanum OX=147425 GN=RGA1 PE=2 SV=2	S	Function unknown	putative viral resistance protein [Oryza sativa Japonica Group]	-	2	1	28926196
LOC_OS02G41610	--	--	--	--	--	--	--	--	--	S	Function unknown	PREDICTED: uncharacterized protein LOC9266596 [Oryza sativa Japonica Group]	+	3	1	24960079
LOC_OS01G11430	--	--	--	--	--	--	--	--	--	S	Function unknown	PREDICTED: uncharacterized protein LOC9271635 isoform X1 [Oryza sativa Japonica Group]	-	3	1	6139574
LOC_OS05G38230	--	--	Cellular Component: nucleus (GO:0005634);; Cellular Component: cytosol (GO:0005829);; Molecular Function: alcohol dehydrogenase (NADP+) activity (GO:0008106);; Biological Process: response to cold (GO:0009409);; Biological Process: response to water deprivation (GO:0009414);; Cellular Component: chloroplast (GO:0009507);; Biological Process: response to salt stress (GO:0009651);; Molecular Functi…	--	--	[R]	General function prediction only	Aldo/keto reductase family	Aldo-keto reductase family 4 member C10 OS=Arabidopsis thaliana OX=3702 GN=AKR4C10 PE=1 SV=1	S	Function unknown	PREDICTED: aldo-keto reductase family 4 member C10 isoform X1 [Oryza sativa Japonica Group]	-	8	2	2241005322409910
LOC_OS04G48710	--	--	Biological Process: proteolysis (GO:0006508);; Molecular Function: cysteine-type peptidase activity (GO:0008234);;	--	--	--	--	Papain family cysteine protease	--	S	Function unknown	PREDICTED: uncharacterized protein LOC4336738 [Oryza sativa Japonica Group]	+	9	2	2904670729046800
LOC_OS07G32590	--	--	Molecular Function: aminopeptidase activity (GO:0004177);; Cellular Component: mitochondrion (GO:0005739);; Cellular Component: cytosol (GO:0005829);; Biological Process: proteolysis (GO:0006508);; Molecular Function: metalloexopeptidase activity (GO:0008235);; Cellular Component: chloroplast (GO:0009507);; Cellular Component: plastid (GO:0009536);; Biological Process: response to abiotic stimulu…	K01265|0|osa:4343349|Os07g0510100; K01265 methionyl aminopeptidase [EC:3.4.11.18] (A)	--	[O]	Posttranslational modification, protein turnover, chaperones	Metallopeptidase family M24	Methionine aminopeptidase 1B, chloroplastic OS=Arabidopsis thaliana OX=3702 GN=MAP1B PE=2 SV=2	J	Translation, ribosomal structure and biogenesis	PREDICTED: methionine aminopeptidase 1B, chloroplastic [Oryza sativa Japonica Group]	+	7	2	1943211119432140
LOC_OS05G43490	--	--	Cellular Component: nucleus (GO:0005634);; Biological Process: signal transduction (GO:0007165);; Biological Process: response to hormone (GO:0009725);; Biological Process: auxin polar transport (GO:0009926);; Biological Process: heat acclimation (GO:0010286);; Biological Process: cellular response to organic substance (GO:0071310);;	--	--	--	--	F-box-like;; F-box domain	F-box protein At5g46170 OS=Arabidopsis thaliana OX=3702 GN=At5g46170 PE=2 SV=1	S	Function unknown	hypothetical protein OsI_20579 [Oryza sativa Indica Group]	+	10	2	2528660625286640
LOC_OS05G43060	--	--	Biological Process: reproduction (GO:0000003);; Molecular Function: nucleotide binding (GO:0000166);; Cellular Component: nucleus (GO:0005634);; Biological Process: DNA metabolic process (GO:0006259);; Biological Process: DNA methylation (GO:0006306);; Biological Process: regulation of transcription from RNA polymerase II promoter (GO:0006357);; Biological Process: anatomical structure morphogene…	--	--	[K]	Transcription	Early transcription elongation factor of RNA pol II, NGN section;; KOW motif	Protein RNA-directed DNA methylation 3 OS=Arabidopsis thaliana OX=3702 GN=RDM3 PE=1 SV=1	K	Transcription	PREDICTED: LOW QUALITY PROTEIN: protein RNA-directed DNA methylation 3 [Oryza sativa Japonica Group]	+	9	1	25014749
LOC_OS03G27840	--	--	Molecular Function: catalytic activity (GO:0003824);; Molecular Function: protein binding (GO:0005515);; Cellular Component: vacuole (GO:0005773);; Biological Process: fatty acid beta-oxidation (GO:0006635);; Biological Process: defense response (GO:0006952);; Biological Process: multicellular organismal development (GO:0007275);; Biological Process: gene expression (GO:0010467);; Biological Proc…	--	--	[A]	RNA processing and modification	Alternative splicing regulator	--	S	Function unknown	PREDICTED: CLK4-associating serine/arginine rich protein [Oryza sativa Japonica Group]	+	5	1	15992760
LOC_OS12G08830	--	--	Biological Process: maltose metabolic process (GO:0000023);; Molecular Function: calcium ion binding (GO:0005509);; Biological Process: pentose-phosphate shunt (GO:0006098);; Cellular Component: chloroplast thylakoid (GO:0009534);; Cellular Component: chloroplast thylakoid lumen (GO:0009543);; Cellular Component: chloroplast stroma (GO:0009570);; Cellular Component: photosystem II oxygen evolving…	--	--	--	--	PsbP	PsbP domain-containing protein 4, chloroplastic OS=Arabidopsis thaliana OX=3702 GN=PPD4 PE=1 SV=2	S	Function unknown	PREDICTED: psbP domain-containing protein 4, chloroplastic [Oryza sativa Japonica Group]	-	6	1	4556083
LOC_OS04G49990	--	--	Molecular Function: DNA binding (GO:0003677);; Cellular Component: nucleoplasm (GO:0005654);; Biological Process: carpel development (GO:0048440);; Biological Process: anther development (GO:0048653);;	--	--	--	--	Domain of unknown function (DUF296)	AT-hook motif nuclear-localized protein 10 OS=Arabidopsis thaliana OX=3702 GN=AHL10 PE=1 SV=2	S	Function unknown	PREDICTED: AT-hook motif nuclear-localized protein 10 [Oryza sativa Japonica Group]	-	16	1	29814044
LOC_OS04G04060	--	--	Molecular Function: GTPase activity (GO:0003924);; Molecular Function: GTP binding (GO:0005525);; Biological Process: GTP catabolic process (GO:0006184);; Biological Process: DNA metabolic process (GO:0006259);; Biological Process: defense response (GO:0006952);; Biological Process: organelle organization (GO:0006996);; Biological Process: response to biotic stimulus (GO:0009607);; Biological Pro…	--	--	[UR]	--	Dynamin central region;; Dynamin family;; Dynamin GTPase effector domain	Dynamin-related protein 4C OS=Arabidopsis thaliana OX=3702 GN=DRP4C PE=2 SV=1	S	Function unknown	PREDICTED: dynamin-related protein 4C isoform X1 [Oryza sativa Japonica Group]	-	5	1	1874530
LOC_OS04G58180	--	--	Cellular Component: nucleus (GO:0005634);; Cellular Component: cytosol (GO:0005829);; Biological Process: defense response (GO:0006952);; Biological Process: signal transduction (GO:0007165);; Biological Process: nucleotide metabolic process (GO:0009117);; Biological Process: post-embryonic development (GO:0009791);; Biological Process: regulation of gene expression (GO:0010468);; Cellular Compon…	--	--	[S]	Function unknown	WD domain, G-beta repeat;; Anaphase-promoting complex subunit 4 WD40 domain	COMPASS-like H3K4 histone methylase component WDR5B OS=Arabidopsis thaliana OX=3702 GN=WDR5B PE=1 SV=1	S	Function unknown	hypothetical protein OsI_17932 [Oryza sativa Indica Group]	+	5	2	3465520634655150
LOC_OS12G01390	--	--	Molecular Function: structural molecule activity (GO:0005198);; Molecular Function: protein binding (GO:0005515);; Cellular Component: vacuole (GO:0005773);; Cellular Component: vacuolar membrane (GO:0005774);; Cellular Component: cytosol (GO:0005829);; Biological Process: intracellular protein transport (GO:0006886);; Biological Process: endocytosis (GO:0006897);; Cellular Component: plasmodesma…	--	--	[U]	Intracellular trafficking, secretion, and vesicular transport	Region in Clathrin and VPS;; Clathrin propeller repeat;; Clathrin-H-link;; Clathrin, heavy-chain linker	Clathrin heavy chain 2 OS=Oryza sativa subsp. japonica OX=39947 GN=Os12g0104800 PE=3 SV=1	U	Intracellular trafficking, secretion, and vesicular transport	PREDICTED: clathrin heavy chain 2 [Oryza sativa Japonica Group]	+	21	2	259837259916
LOC_OS12G40560	--	--	Molecular Function: RNA binding (GO:0003723);; Cellular Component: nucleus (GO:0005634);; Biological Process: positive regulation of flower development (GO:0009911);;	K13162|0|osa:4352707|Os12g0597600; K13162 poly(rC)-binding protein 2/3/4 (A)	--	[AR]	--	KH domain;; KH domain	RNA-binding KH domain-containing protein PEPPER OS=Arabidopsis thaliana OX=3702 GN=PEP PE=1 SV=1	S	Function unknown	PREDICTED: LOW QUALITY PROTEIN: flowering locus K homology domain [Oryza sativa Japonica Group]	+	18	1	25098238
LOC_OS02G02620	--	--	Cellular Component: endosome (GO:0005768);; Cellular Component: trans-Golgi network (GO:0005802);; Biological Process: protein glycosylation (GO:0006486);; Molecular Function: sialyltransferase activity (GO:0008373);; Cellular Component: cytoplasmic membrane-bounded vesicle (GO:0016023);; Cellular Component: integral component of Golgi membrane (GO:0030173);;	--	--	[G]	Carbohydrate transport and metabolism	Glycosyltransferase family 29 (sialyltransferase)	Sialyltransferase-like protein 4 OS=Oryza sativa subsp. japonica OX=39947 GN=STLP4 PE=2 SV=1	S	Function unknown	PREDICTED: sialyltransferase-like protein 4 [Oryza sativa Japonica Group]	+	13	3	9.65325e+17
LOC_OS03G09080	--	--	Molecular Function: ubiquitin thiolesterase activity (GO:0004221);; Molecular Function: ubiquitin-specific protease activity (GO:0004843);; Cellular Component: nucleus (GO:0005634);; Cellular Component: cytoplasm (GO:0005737);; Biological Process: glucose catabolic process (GO:0006007);; Biological Process: N-terminal protein myristoylation (GO:0006499);; Biological Process: ubiquitin-dependent p…	K11842|0|osa:4331901|Os03g0190800; K11842 ubiquitin carboxyl-terminal hydrolase 12/46 [EC:3.4.19.12] (A)	--	[O]	Posttranslational modification, protein turnover, chaperones	Ubiquitin carboxyl-terminal hydrolase;; Ubiquitin carboxyl-terminal hydrolase	Ubiquitin carboxyl-terminal hydrolase 3 OS=Arabidopsis thaliana OX=3702 GN=UBP3 PE=1 SV=1	O	Posttranslational modification, protein turnover, chaperones	PREDICTED: ubiquitin carboxyl-terminal hydrolase 3 [Oryza sativa Japonica Group]	-	2	1	4715151
LOC_OS09G10274	--	--	--	--	--	--	--	--	--	--	--	unknown protein [Oryza sativa Japonica Group]	+	5	2	55997545599780
LOC_OS04G55040	--	--	Cellular Component: plant-type vacuole (GO:0000325);; Cellular Component: vacuolar membrane (GO:0005774);; Cellular Component: Golgi apparatus (GO:0005794);; Cellular Component: plasma membrane (GO:0005886);; Biological Process: glucose catabolic process (GO:0006007);; Biological Process: ubiquitin-dependent protein catabolic process (GO:0006511);; Biological Process: protein targeting to vacuole…	K02149|0|osa:4337176|Os04g0643100; K02149 V-type H+-transporting ATPase subunit D (A)	ko00190:Oxidative phosphorylation;ko04145:Phagosome	[C]	Energy production and conversion	ATP synthase subunit D	V-type proton ATPase subunit D OS=Arabidopsis thaliana OX=3702 GN=VHA-D PE=1 SV=2	C	Energy production and conversion	PREDICTED: V-type proton ATPase subunit D [Oryza sativa Japonica Group]	+	22	4	3.27355e+31
LOC_OS03G61570	--	--	Molecular Function: binding (GO:0005488);; Cellular Component: plastid (GO:0009536);; Biological Process: post-embryonic development (GO:0009791);; Biological Process: gene expression (GO:0010467);; Biological Process: heterocycle biosynthetic process (GO:0018130);; Biological Process: regulation of metabolic process (GO:0019222);; Biological Process: aromatic compound biosynthetic process (GO:00…	--	--	[K]	Transcription	--	GATA transcription factor 16 OS=Arabidopsis thaliana OX=3702 GN=GATA16 PE=2 SV=1	--	--	expressed protein [Oryza sativa Japonica Group]	+	8	1	34914842
LOC_OS08G09860	--	--	Biological Process: transition metal ion transport (GO:0000041);; Cellular Component: nucleus (GO:0005634);; Cellular Component: vacuole (GO:0005773);; Cellular Component: peroxisome (GO:0005777);; Molecular Function: glycolate oxidase activity (GO:0008891);; Cellular Component: plasmodesma (GO:0009506);; Cellular Component: chloroplast stroma (GO:0009570);; Biological Process: photorespiration (…	K11517|6.49998e-43|pda:103697143|peroxisomal (S)-2-hydroxy-acid oxidase GLO1-like; K11517 (S)-2-hydroxy-acid oxidase [EC:1.1.3.15] (A)	ko00630:Glyoxylate and dicarboxylate metabolism;ko04146:Peroxisome	[C]	Energy production and conversion	FMN-dependent dehydrogenase	Peroxisomal (S)-2-hydroxy-acid oxidase GLO1 OS=Oryza sativa subsp. japonica OX=39947 GN=GLO1 PE=1 SV=1	C	Energy production and conversion	hypothetical protein OsI_28163 [Oryza sativa Indica Group]	+	9	1	5697411
LOC_OS12G42610	--	--	Molecular Function: protein binding (GO:0005515);; Cellular Component: nucleus (GO:0005634);; Biological Process: chromatin assembly or disassembly (GO:0006333);; Biological Process: regulation of translation (GO:0006417);; Biological Process: response to abscisic acid (GO:0009737);; Biological Process: embryo development ending in seed dormancy (GO:0009793);; Biological Process: seed germination…	--	--	--	--	YABBY protein	Protein YABBY 6 OS=Oryza sativa subsp. japonica OX=39947 GN=YAB6 PE=2 SV=1	K	Transcription	PREDICTED: protein YABBY 6 [Oryza sativa Japonica Group]	+	10	3	2.64872e+23
LOC_OS08G01410	--	--	Molecular Function: GDP-fucose transmembrane transporter activity (GO:0005457);; Molecular Function: UDP-galactose transmembrane transporter activity (GO:0005459);; Molecular Function: UDP-glucose transmembrane transporter activity (GO:0005460);; Cellular Component: endoplasmic reticulum (GO:0005783);; Cellular Component: Golgi apparatus (GO:0005794);; Cellular Component: plasma membrane (GO:0005…	--	--	[GE]	--	Triose-phosphate Transporter family;; EamA-like transporter family;; UAA transporter family	UDP-galactose transporter 1 OS=Arabidopsis thaliana OX=3702 GN=UDP-GALT1 PE=2 SV=1	S	Function unknown	PREDICTED: UDP-galactose transporter 1 [Oryza sativa Japonica Group]	-	6	1	268720
LOC_OS05G32660	--	--	Cellular Component: mitochondrion (GO:0005739);; Biological Process: defense response (GO:0006952);; Biological Process: immune response (GO:0006955);; Biological Process: cell communication (GO:0007154);; Biological Process: signal transduction (GO:0007165);; Cellular Component: cytoplasmic membrane-bounded vesicle (GO:0016023);; Biological Process: cellular metabolic process (GO:0044237);; Biol…	--	--	[R]	General function prediction only	Carbohydrate-binding protein of the ER;; Di-glucose binding within endoplasmic reticulum;; Leucine rich repeat N-terminal domain	Leucine-rich repeat receptor-like serine/threonine-protein kinase At2g14510 OS=Arabidopsis thaliana OX=3702 GN=At2g14510 PE=2 SV=1	S	Function unknown	PREDICTED: leucine-rich repeat receptor-like serine/threonine-protein kinase At2g14510 [Oryza sativa Japonica Group]	+	12	2	1912289919123010
LOC_OS05G24550	--	--	Molecular Function: cysteine-type endopeptidase activity (GO:0004197);; Biological Process: proteolysis (GO:0006508);; Biological Process: response to stress (GO:0006950);; Biological Process: response to abiotic stimulus (GO:0009628);; Biological Process: cellular process (GO:0009987);; Molecular Function: hydrolase activity (GO:0016787);; Biological Process: response to chemical (GO:0042221);; …	K01363|0|osa:9267789|Os05g0310500; K01363 cathepsin B [EC:3.4.22.1] (A)	--	[O]	Posttranslational modification, protein turnover, chaperones	Papain family cysteine protease;; Peptidase family C1 propeptide	Cathepsin B-like protease 2 OS=Arabidopsis thaliana OX=3702 GN=CATHB2 PE=2 SV=1	O	Posttranslational modification, protein turnover, chaperones	PREDICTED: cathepsin B isoform X1 [Oryza sativa Japonica Group]	+	62	5	1.41655e+39
LOC_OS02G58139	--	--	Biological Process: signal peptide processing (GO:0006465);; Molecular Function: peptidase activity (GO:0008233);; Biological Process: post-embryonic development (GO:0009791);; Cellular Component: membrane (GO:0016020);; Cellular Component: cytoplasmic membrane-bounded vesicle (GO:0016023);; Molecular Function: transferase activity (GO:0016740);; Cellular Component: intracellular membrane-bounded…	--	--	[R]	General function prediction only	PPR repeat family;; PPR repeat;; PPR repeat;; Pentatricopeptide repeat domain;; Pentacotripeptide-repeat region of PRORP	Pentatricopeptide repeat-containing protein At5g38730 OS=Arabidopsis thaliana OX=3702 GN=At5g38730 PE=2 SV=1	S	Function unknown	PREDICTED: pentatricopeptide repeat-containing protein At5g38730-like [Oryza sativa Japonica Group]	-	4	1	35572413
LOC_OS03G17930	--	--	Biological Process: organelle organization (GO:0006996);; Molecular Function: syntaxin binding (GO:0019905);; Cellular Component: nuclear lumen (GO:0031981);;	--	--	[Z]	Cytoskeleton	Myosin-like coiled-coil protein	--	S	Function unknown	PREDICTED: beta-taxilin isoform X1 [Oryza sativa Japonica Group]	+	9	1	9990332
LOC_OS05G04820	--	--	Biological Process: tryptophan biosynthetic process (GO:0000162);; Biological Process: defense response to insect (GO:0002213);; Molecular Function: DNA binding (GO:0003677);; Molecular Function: chromatin binding (GO:0003682);; Molecular Function: sequence-specific DNA binding transcription factor activity (GO:0003700);; Cellular Component: nucleus (GO:0005634);; Biological Process: polyamine ca…	K09422|0|osa:4337756|Os05g0140100; K09422 myb proto-oncogene protein, plant (A)	--	[K]	Transcription	Myb-like DNA-binding domain;; Myb-like DNA-binding domain	Transcription factor MYB61 OS=Arabidopsis thaliana OX=3702 GN=MYB61 PE=2 SV=1	K	Transcription	PREDICTED: transcription factor MYB28 [Oryza sativa Japonica Group]	+	12	2	23152552315440
LOC_OS09G38790	--	--	Molecular Function: DNA binding (GO:0003677);; Molecular Function: sequence-specific DNA binding transcription factor activity (GO:0003700);; Cellular Component: nucleus (GO:0005634);; Biological Process: regulation of transcription, DNA-templated (GO:0006355);; Molecular Function: zinc ion binding (GO:0008270);; Biological Process: negative regulation of flower development (GO:0009910);; Biologi…	--	--	[R]	General function prediction only	--	Protein SUPPRESSOR OF FRI 4 OS=Arabidopsis thaliana OX=3702 GN=SUF4 PE=1 SV=1	S	Function unknown	PREDICTED: protein SUPPRESSOR OF FRI 4 isoform X1 [Oryza sativa Japonica Group]	-	19	2	2228717922287250
LOC_OS06G24730	--	--	Molecular Function: protein binding (GO:0005515);; Cellular Component: chloroplast (GO:0009507);; Biological Process: chlorophyll catabolic process (GO:0015996);; Molecular Function: pheophytinase activity (GO:0080124);;	--	--	[R]	General function prediction only	Alpha/beta hydrolase family;; alpha/beta hydrolase fold;; Serine aminopeptidase, S33	Pheophytinase, chloroplastic OS=Arabidopsis thaliana OX=3702 GN=PPH PE=1 SV=1	S	Function unknown	hypothetical protein OsI_22903 [Oryza sativa Indica Group]	+	9	2	1453092314531820
LOC_OS01G07700	--	--	Cellular Component: membrane (GO:0016020);; Cellular Component: cytoplasmic membrane-bounded vesicle (GO:0016023);;	--	--	--	--	--	--	S	Function unknown	PREDICTED: uncharacterized protein LOC4327642 [Oryza sativa Japonica Group]	-	5	1	3696141
LOC_OS01G25600	--	--	Cellular Component: chloroplast (GO:0009507);; Biological Process: thylakoid membrane organization (GO:0010027);; Biological Process: photosystem II oxygen evolving complex assembly (GO:0010270);;	--	--	--	--	Protein of unknown function (DUF3493);; Tetratricopeptide repeat;; Tetratricopeptide repeat;; Tetratricopeptide repeat	Protein LOW PSII ACCUMULATION 1, chloroplastic OS=Arabidopsis thaliana OX=3702 GN=LPA1 PE=1 SV=1	S	Function unknown	PREDICTED: protein LOW PSII ACCUMULATION 1, chloroplastic [Oryza sativa Japonica Group]	-	3	1	14506818
LOC_OS01G48190	--	--	Cellular Component: mitochondrion (GO:0005739);;	--	--	--	--	Stress-induced protein Di19, C-terminal;; Drought induced 19 protein (Di19), zinc-binding	Protein DEHYDRATION-INDUCED 19 homolog 3 OS=Oryza sativa subsp. japonica OX=39947 GN=DI19-3 PE=2 SV=1	S	Function unknown	PREDICTED: protein DEHYDRATION-INDUCED 19 homolog 3 [Oryza sativa Japonica Group]	+	40	4	2.76049e+31
LOC_OS02G55140	--	--	Molecular Function: aminopeptidase activity (GO:0004177);; Cellular Component: vacuole (GO:0005773);; Cellular Component: cytosol (GO:0005829);; Biological Process: gluconeogenesis (GO:0006094);; Biological Process: glycolytic process (GO:0006096);; Biological Process: proteolysis (GO:0006508);; Biological Process: protein targeting to vacuole (GO:0006623);; Biological Process: water transport (G…	--	--	[R]	General function prediction only	Cytosol aminopeptidase family, catalytic domain;; Cytosol aminopeptidase family, N-terminal domain	Leucine aminopeptidase 2, chloroplastic OS=Oryza sativa subsp. japonica OX=39947 GN=Os02g0794700 PE=2 SV=1	E	Amino acid transport and metabolism	PREDICTED: formin-like protein 7 [Oryza sativa Japonica Group]	-	9	2	3377930833779410
LOC_OS06G50539	--	--	Cellular Component: cell part (GO:0044464);;	--	--	--	--	Protein of unknown function (DUF1618)	--	S	Function unknown	PREDICTED: uncharacterized protein LOC4342091 [Oryza sativa Japonica Group]	+	6	2	3060276130602780
LOC_OS05G06760	--	--	Cellular Component: cytosol (GO:0005829);; Cellular Component: plastid (GO:0009536);;	K18624|0|osa:4337882|Os05g0160100; K18624 macrophage erythroblast attacher (A)	--	[S]	Function unknown	CTLH/CRA C-terminal to LisH motif domain	Protein MAEA homolog OS=Arabidopsis thaliana OX=3702 GN=MAEA PE=1 SV=1	S	Function unknown	PREDICTED: macrophage erythroblast attacher [Oryza sativa Japonica Group]	+	14	2	35348283534851
LOC_OS07G14650	--	--	Cellular Component: cytoplasmic membrane-bounded vesicle (GO:0016023);;	--	--	--	--	--	--	S	Function unknown	PREDICTED: uncharacterized protein LOC4342842 [Oryza sativa Japonica Group]	+	5	1	8354847
LOC_OS02G36520	--	--	Cellular Component: cytoplasm (GO:0005737);;	--	--	[R]	General function prediction only	Kelch motif;; Kelch motif;; Galactose oxidase, central domain;; Kelch motif;; Galactose oxidase, central domain;; F-box domain	F-box/kelch-repeat protein At1g22040 OS=Arabidopsis thaliana OX=3702 GN=At1g22040 PE=2 SV=1	S	Function unknown	PREDICTED: F-box/kelch-repeat protein At1g22040 isoform X1 [Oryza sativa Japonica Group]	+	3	1	22063313
LOC_OS08G43480	--	--	Molecular Function: ubiquitin-protein transferase activity (GO:0004842);; Cellular Component: nucleus (GO:0005634);; Molecular Function: zinc ion binding (GO:0008270);; Biological Process: response to endogenous stimulus (GO:0009719);; Biological Process: response to organic substance (GO:0010033);; Molecular Function: ubiquitin conjugating enzyme binding (GO:0031624);; Biological Process: negati…	--	--	[O]	Posttranslational modification, protein turnover, chaperones	Ring finger domain;; RING-H2 zinc finger domain;; Zinc finger, C3HC4 type (RING finger);; RING-like zinc finger;; zinc-RING finger domain;; Zinc finger, C3HC4 type (RING finger);; Anaphase-promoting complex subunit 11 RING-H2 finger	E3 ubiquitin ligase BIG BROTHER-related OS=Arabidopsis thaliana OX=3702 GN=BBR PE=2 SV=1	O	Posttranslational modification, protein turnover, chaperones	hypothetical protein OsI_30152 [Oryza sativa Indica Group]	+	3	1	27504843
LOC_OS04G55710	--	--	Molecular Function: asparaginase activity (GO:0004067);; Biological Process: glycoprotein catabolic process (GO:0006516);; Molecular Function: hydrolase activity (GO:0016787);; Biological Process: protein metabolic process (GO:0019538);; Cellular Component: intracellular membrane-bounded organelle (GO:0043231);; Biological Process: cellular metabolic process (GO:0044237);; Cellular Component: int…	--	--	[E]	Amino acid transport and metabolism	Asparaginase	Probable isoaspartyl peptidase/L-asparaginase 2 OS=Arabidopsis thaliana OX=3702 GN=At3g16150 PE=2 SV=2	E	Amino acid transport and metabolism	PREDICTED: probable isoaspartyl peptidase/L-asparaginase 2 [Oryza sativa Japonica Group]	+	7	1	33164512
LOC_OS06G11990	--	--	Cellular Component: mitochondrion (GO:0005739);; Cellular Component: plasma membrane (GO:0005886);; Cellular Component: plasmodesma (GO:0009506);; Biological Process: plant-type cell wall biogenesis (GO:0009832);; Molecular Function: ligase activity (GO:0016874);; Biological Process: cellulose biosynthetic process (GO:0030244);; Biological Process: cellular protein metabolic process (GO:0044267);…	--	--	[S]	Function unknown	Armadillo/beta-catenin-like repeat;; C2 domain;; HEAT repeats;; V-ATPase subunit H;; Armadillo-like	Protein CELLULOSE SYNTHASE INTERACTIVE 1 OS=Arabidopsis thaliana OX=3702 GN=CSI1 PE=1 SV=1	S	Function unknown	PREDICTED: uncharacterized protein LOC4340531 [Oryza sativa Japonica Group]	-	43	5	6.40152e+34
LOC_OS04G33420	--	--	Molecular Function: DNA binding (GO:0003677);; Cellular Component: nucleus (GO:0005634);; Biological Process: regulation of transcription, DNA-templated (GO:0006355);;	--	--	--	--	DNA binding protein S1FA	DNA-binding protein S1FA1 OS=Oryza sativa subsp. japonica OX=39947 GN=S1FA1 PE=3 SV=1	S	Function unknown	PREDICTED: DNA-binding protein S1FA1 [Oryza sativa Japonica Group]	-	10	2	2022904620229020
LOC_OS03G46340	--	--	Biological Process: signal transduction (GO:0007165);; Cellular Component: plant-type cell wall (GO:0009505);; Molecular Function: phosphatidylinositol binding (GO:0035091);;	--	--	--	--	PH domain	--	S	Function unknown	PREDICTED: switch-associated protein 70 [Oryza sativa Japonica Group]	-	11	1	26207855
LOC_OS11G42160	--	--	Molecular Function: ubiquitin-protein transferase activity (GO:0004842);; Molecular Function: binding (GO:0005488);; Cellular Component: nucleus (GO:0005634);; Biological Process: protein glycosylation (GO:0006486);; Biological Process: ubiquitin-dependent protein catabolic process (GO:0006511);; Biological Process: cell communication (GO:0007154);; Biological Process: response to abiotic stimulu…	K10268|0|osa:4351003|Os11g0641200; K10268 F-box and leucine-rich repeat protein 2/20 (A)	--	[R]	General function prediction only	Leucine Rich repeat;; Leucine Rich repeats (2 copies);; F-box-like	F-box/LRR-repeat protein 4 OS=Arabidopsis thaliana OX=3702 GN=FBL4 PE=2 SV=1	S	Function unknown	PREDICTED: F-box/LRR-repeat protein 4 [Oryza sativa Japonica Group]	+	5	1	25399435
LOC_OS07G02340	--	--	--	--	--	--	--	Zinc-binding;; 4F5 protein family	Uncharacterized protein At2g23090 OS=Arabidopsis thaliana OX=3702 GN=At2g23090 PE=1 SV=1	S	Function unknown	PREDICTED: uncharacterized protein At2g23090 [Oryza sativa Japonica Group]	+	46	4	7.98977e+23
LOC_OS05G46240	--	--	Cellular Component: mitochondrion (GO:0005739);; Cellular Component: endoplasmic reticulum (GO:0005783);; Cellular Component: Golgi apparatus (GO:0005794);; Biological Process: phosphatidylinositol biosynthetic process (GO:0006661);; Biological Process: negative regulation of ethylene-activated signaling pathway (GO:0010105);;	--	--	[S]	Function unknown	Protein of unknown function (DUF778)	Protein REVERSION-TO-ETHYLENE SENSITIVITY1 OS=Arabidopsis thaliana OX=3702 GN=RTE1 PE=1 SV=1	S	Function unknown	PREDICTED: protein REVERSION-TO-ETHYLENE SENSITIVITY1 [Oryza sativa Japonica Group]	-	5	1	26815627
LOC_OS03G15340	--	--	Molecular Function: copper ion binding (GO:0005507);; Cellular Component: plasma membrane (GO:0005886);; Molecular Function: electron carrier activity (GO:0009055);; Cellular Component: cytoplasmic membrane-bounded vesicle (GO:0016023);; Cellular Component: anchored component of membrane (GO:0031225);; Cellular Component: intracellular membrane-bounded organelle (GO:0043231);; Biological Process:…	--	--	--	--	Plastocyanin-like domain	Chemocyanin OS=Lilium longiflorum OX=4690 PE=1 SV=1	S	Function unknown	PREDICTED: chemocyanin [Oryza sativa Japonica Group]	+	9	1	8397410
LOC_OS03G60480	--	--	Biological Process: response to reactive oxygen species (GO:0000302);; Cellular Component: chromatin (GO:0000785);; Cellular Component: nucleus (GO:0005634);; Cellular Component: mitochondrion (GO:0005739);; Cellular Component: plasma membrane (GO:0005886);; Biological Process: DNA-dependent DNA replication (GO:0006261);; Biological Process: DNA methylation (GO:0006306);; Biological Process: chro…	--	--	[P]	Inorganic ion transport and metabolism	Heavy-metal-associated domain	Protein SODIUM POTASSIUM ROOT DEFECTIVE 2 OS=Arabidopsis thaliana OX=3702 GN=NAKR2 PE=2 SV=1	S	Function unknown	PREDICTED: uncharacterized protein LOC4334586 [Oryza sativa Japonica Group]	-	8	1	34386206
LOC_OS02G35870	--	--	Biological Process: RNA splicing, via endonucleolytic cleavage and ligation (GO:0000394);; Cellular Component: mitochondrion (GO:0005739);; Cellular Component: endosome (GO:0005768);; Cellular Component: Golgi apparatus (GO:0005794);; Cellular Component: trans-Golgi network (GO:0005802);; Biological Process: methylation-dependent chromatin silencing (GO:0006346);; Biological Process: protein glyc…	--	--	[G]	Carbohydrate transport and metabolism	Galactosyltransferase;; Domain of unknown function (DUF4094)	Beta-1,3-galactosyltransferase 7 OS=Arabidopsis thaliana OX=3702 GN=B3GALT7 PE=2 SV=1	S	Function unknown	PREDICTED: beta-1,3-galactosyltransferase 7 [Oryza sativa Japonica Group]	-	7	1	21549916
LOC_OS07G48229	--	--	Cellular Component: Golgi membrane (GO:0000139);; Molecular Function: calcium ion binding (GO:0005509);; Cellular Component: nucleus (GO:0005634);; Cellular Component: trans-Golgi network (GO:0005802);; Cellular Component: plasma membrane (GO:0005886);; Cellular Component: integral component of plasma membrane (GO:0005887);; Biological Process: protein targeting to vacuole (GO:0006623);; Biologic…	--	--	--	--	PA domain	Vacuolar-sorting receptor 1 OS=Arabidopsis thaliana OX=3702 GN=VSR1 PE=1 SV=2	U	Intracellular trafficking, secretion, and vesicular transport	PREDICTED: vacuolar-sorting receptor 1 [Oryza sativa Japonica Group]	-	4	1	28809535
LOC_OS07G25460	--	--	Cellular Component: plasma membrane (GO:0005886);; Molecular Function: hydrolase activity (GO:0016787);; Biological Process: macromolecule metabolic process (GO:0043170);;	--	--	[R]	General function prediction only	GPCR-chaperone;; Ankyrin repeats (many copies)	--	S	Function unknown	PREDICTED: ankyrin repeat domain-containing protein 13B [Oryza sativa Japonica Group]	-	3	1	14574824
LOC_OS02G52650	--	--	Biological Process: rRNA processing (GO:0006364);; Biological Process: nitrogen compound metabolic process (GO:0006807);; Biological Process: cation transport (GO:0006812);; Cellular Component: photosystem II (GO:0009523);; Cellular Component: chloroplast thylakoid membrane (GO:0009535);; Biological Process: response to red or far red light (GO:0009639);; Biological Process: photosynthesis, light…	K08911|1.17983e-174|osa:4330828|Os02g0764500; K08911 light-harvesting complex I chlorophyll a/b binding protein 5 (A)	ko00196:Photosynthesis - antenna proteins	--	--	Chlorophyll A-B binding protein	Photosystem I chlorophyll a/b-binding protein 5, chloroplastic OS=Arabidopsis thaliana OX=3702 GN=LHCA5 PE=1 SV=1	S	Function unknown	PREDICTED: chlorophyll a-b binding protein 4, chloroplastic [Oryza sativa Japonica Group]	-	3	1	32199544
LOC_OS03G18490	--	--	Cellular Component: membrane (GO:0016020);; Biological Process: single-organism cellular process (GO:0044763);; Cellular Component: cell periphery (GO:0071944);;	--	--	--	--	--	--	S	Function unknown	expressed protein [Oryza sativa Japonica Group]	+	9	2	1036819710368290
LOC_OS03G14370	--	--	Biological Process: nuclear division (GO:0000280);; Biological Process: cytokinesis by cell plate formation (GO:0000911);; Cellular Component: nucleus (GO:0005634);; Cellular Component: plasma membrane (GO:0005886);; Biological Process: cellular amino acid metabolic process (GO:0006520);; Biological Process: nucleolus organization (GO:0007000);; Biological Process: metabolic process (GO:0008152);…	--	--	--	--	ACT domain	ACT domain-containing protein ACR8 OS=Arabidopsis thaliana OX=3702 GN=ACR8 PE=2 SV=1	S	Function unknown	ACT domain containing protein, expressed [Oryza sativa Japonica Group]	+	6	1	7817730
LOC_OS03G63870	--	--	Biological Process: telomere maintenance (GO:0000723);; Molecular Function: DNA helicase activity (GO:0003678);; Biological Process: DNA metabolic process (GO:0006259);; Biological Process: DNA repair (GO:0006281);; Biological Process: DNA duplex unwinding (GO:0032508);; Biological Process: single-organism cellular process (GO:0044763);; Biological Process: regulation of biological process (GO:00…	K07466|0|dosa:Os03t0855700-01|Os03g0855700; Nucleic acid-binding, OB-fold domain containing protein.; K07466 replication factor A1 (A)	ko03030:DNA replication;ko03420:Nucleotide excision repair;ko03430:Mismatch repair;ko03440:Homologous recombination	[L]	Replication, recombination and repair	Domain of unknown function DUF223	Replication protein A 70 kDa DNA-binding subunit B OS=Arabidopsis thaliana OX=3702 GN=RPA1B PE=3 SV=1	L	Replication, recombination and repair	PREDICTED: replication protein A 70 kDa DNA-binding subunit B isoform X3 [Oryza sativa Japonica Group]	+	5	1	36096473
LOC_OS03G42820	--	--	Cellular Component: mitochondrion (GO:0005739);; Molecular Function: zinc ion binding (GO:0008270);; Biological Process: phloem development (GO:0010088);; Molecular Function: ubiquitin binding (GO:0043130);; Cellular Component: intracellular part (GO:0044424);; Biological Process: negative regulation of organ growth (GO:0046621);; Biological Process: seed morphogenesis (GO:0048317);; Biological P…	--	--	[TZ]	--	Protein DA1;; LIM domain;; Ubiquitin interaction motif	Protein DA1-related 1 OS=Arabidopsis thaliana OX=3702 GN=DAR1 PE=1 SV=3	S	Function unknown	PREDICTED: protein DA1-related 1 isoform X2 [Oryza sativa Japonica Group]	+	3	1	23861941
LOC_OS01G46980	--	--	Cellular Component: nucleus (GO:0005634);; Cellular Component: mitochondrial proton-transporting ATP synthase complex (GO:0005753);; Cellular Component: vacuolar membrane (GO:0005774);; Cellular Component: plasma membrane (GO:0005886);; Biological Process: Golgi organization (GO:0007030);; Molecular Function: hydrogen-exporting ATPase activity, phosphorylative mechanism (GO:0008553);; Biological …	K02150|3.69529e-151|osa:4327166|Os01g0659200; K02150 V-type H+-transporting ATPase subunit E (A)	ko00190:Oxidative phosphorylation;ko04145:Phagosome	[C]	Energy production and conversion	ATP synthase (E/31 kDa) subunit	V-type proton ATPase subunit E OS=Citrus limon OX=2708 GN=VATE PE=2 SV=1	C	Energy production and conversion	PREDICTED: V-type proton ATPase subunit E [Oryza sativa Japonica Group]	+	43	2	2681651926816500
LOC_OS07G08070	--	--	Cellular Component: plasma membrane (GO:0005886);; Biological Process: protein targeting to vacuole (GO:0006623);; Biological Process: membrane fusion (GO:0006944);; Biological Process: brassinosteroid mediated signaling pathway (GO:0009742);; Biological Process: unidimensional cell growth (GO:0009826);; Biological Process: trichome branching (GO:0010091);; Cellular Component: integral component …	K06890|2.10929e-163|osa:4342546|Os07g0177300; K06890 (A)	--	[T]	Signal transduction mechanisms	Inhibitor of apoptosis-promoting Bax1	Protein LIFEGUARD 4 OS=Arabidopsis thaliana OX=3702 GN=LFG4 PE=2 SV=1	S	Function unknown	PREDICTED: BI1-like protein [Oryza sativa Japonica Group]	-	20	4	4.08926e+27
LOC_OS07G36090	--	--	Molecular Function: structural constituent of ribosome (GO:0003735);; Cellular Component: ribosome (GO:0005840);; Biological Process: translation (GO:0006412);;	K02902|1.5595e-132|osa:4343516|Os07g0544900; K02902 large subunit ribosomal protein L28 (A)	ko03010:Ribosome	[J]	Translation, ribosomal structure and biogenesis	Ribosomal L28 family	--	J	Translation, ribosomal structure and biogenesis	PREDICTED: 54S ribosomal protein L24, mitochondrial [Oryza sativa Japonica Group]	-	5	1	21576272
LOC_OS01G01484	--	--	Molecular Function: catalytic activity (GO:0003824);; Molecular Function: protein binding (GO:0005515);; Cellular Component: nucleus (GO:0005634);; Cellular Component: mitochondrion (GO:0005739);; Biological Process: DNA repair (GO:0006281);; Biological Process: red, far-red light phototransduction (GO:0009585);; Biological Process: negative regulation of photomorphogenesis (GO:0010100);; Biologi…	K10571|0|osa:4326296|Os01g0104600; K10571 de-etiolated-1 (A)	ko04120:Ubiquitin mediated proteolysis	[K]	Transcription	De-etiolated protein 1 Det1	Light-mediated development protein DET1 OS=Solanum lycopersicum OX=4081 GN=DET1 PE=1 SV=1	O	Posttranslational modification, protein turnover, chaperones	PREDICTED: light-mediated development protein DET1 isoform X1 [Oryza sativa Japonica Group]	-	5	1	248829
LOC_OS04G56760	--	--	Biological Process: mRNA splicing, via spliceosome (GO:0000398);; Molecular Function: GTPase activity (GO:0003924);; Molecular Function: GTP binding (GO:0005525);; Cellular Component: U12-type spliceosomal complex (GO:0005689);; Cellular Component: mitochondrion (GO:0005739);; Biological Process: GTP catabolic process (GO:0006184);; Biological Process: rRNA processing (GO:0006364);; Biological Pr…	K12834|3.8893e-74|vvi:100253580|uncharacterized LOC100253580; K12834 PHD finger-like domain-containing protein 5A (A)	ko03040:Spliceosome	[S]	Function unknown	PHF5-like protein	PHD finger-like domain-containing protein 5B OS=Arabidopsis thaliana OX=3702 GN=At1g07170 PE=3 SV=1	A	RNA processing and modification	putative ribose-5-phosphate isomerase 3 chloroplastic [Zea mays]	-	4	1	33854522
LOC_OS06G48570	--	--	Molecular Function: acid phosphatase activity (GO:0003993);; Molecular Function: protein serine/threonine phosphatase activity (GO:0004722);; Cellular Component: extracellular region (GO:0005576);; Cellular Component: plasmodesma (GO:0009506);; Cellular Component: cytoplasmic membrane-bounded vesicle (GO:0016023);; Biological Process: primary metabolic process (GO:0044238);; Biological Process: c…	--	--	[R]	General function prediction only	Calcineurin-like phosphoesterase	Probable inactive purple acid phosphatase 28 OS=Arabidopsis thaliana OX=3702 GN=PAP28 PE=2 SV=1	S	Function unknown	PREDICTED: probable inactive purple acid phosphatase 28 [Oryza sativa Japonica Group]	-	11	3	2.93833e+23
LOC_OS02G33450	--	--	Molecular Function: peroxidase activity (GO:0004601);; Molecular Function: protein binding (GO:0005515);; Biological Process: response to cold (GO:0009409);; Cellular Component: chloroplast stroma (GO:0009570);; Cellular Component: thylakoid (GO:0009579);; Cellular Component: chloroplast envelope (GO:0009941);; Cellular Component: stromule (GO:0010319);; Biological Process: defense response to ba…	K03386|4.71882e-153|osa:4329578|Os02g0537700; K03386 peroxiredoxin (alkyl hydroperoxide reductase subunit C) [EC:1.11.1.15] (A)	--	[O]	Posttranslational modification, protein turnover, chaperones	AhpC/TSA family;; Redoxin;; C-terminal domain of 1-Cys peroxiredoxin	2-Cys peroxiredoxin BAS1, chloroplastic OS=Oryza sativa subsp. japonica OX=39947 GN=BAS1 PE=1 SV=1	O	Posttranslational modification, protein turnover, chaperones	hypothetical protein OsI_07554 [Oryza sativa Indica Group]	+	13	2	1988570119885720
LOC_OS02G09770	--	--	Molecular Function: protein binding (GO:0005515);; Cellular Component: cell wall (GO:0005618);; Biological Process: mRNA processing (GO:0006397);; Biological Process: proteolysis (GO:0006508);; Biological Process: defense response (GO:0006952);; Molecular Function: peptidase activity (GO:0008233);; Biological Process: catabolic process (GO:0009056);; Cellular Component: plastid (GO:0009536);; Bio…	--	--	[R]	General function prediction only	Serine aminopeptidase, S33;; alpha/beta hydrolase fold;; Prolyl oligopeptidase family	--	S	Function unknown	PREDICTED: alpha/beta hydrolase domain-containing protein 17C isoform X1 [Oryza sativa Japonica Group]	-	3	1	5038999
LOC_OS04G53210	--	--	Biological Process: transition metal ion transport (GO:0000041);; Cellular Component: nucleus (GO:0005634);; Cellular Component: vacuole (GO:0005773);; Cellular Component: peroxisome (GO:0005777);; Molecular Function: glycolate oxidase activity (GO:0008891);; Cellular Component: plasmodesma (GO:0009506);; Cellular Component: chloroplast stroma (GO:0009570);; Biological Process: oxidative photosyn…	K11517|0|osa:4337048|Os04g0623500; K11517 (S)-2-hydroxy-acid oxidase [EC:1.1.3.15] (A)	ko00630:Glyoxylate and dicarboxylate metabolism;ko04146:Peroxisome	[C]	Energy production and conversion	FMN-dependent dehydrogenase;; IMP dehydrogenase / GMP reductase domain;; Conserved region in glutamate synthase	Peroxisomal (S)-2-hydroxy-acid oxidase GLO3 OS=Oryza sativa subsp. japonica OX=39947 GN=GLO3 PE=2 SV=1	C	Energy production and conversion	PREDICTED: peroxisomal (S)-2-hydroxy-acid oxidase GLO3 isoform X1 [Oryza sativa Japonica Group]	+	8	2	3169250231692520
LOC_OS01G60040	--	--	Biological Process: microtubule cytoskeleton organization (GO:0000226);; Cellular Component: nucleus (GO:0005634);; Cellular Component: cytoplasm (GO:0005737);; Cellular Component: spindle (GO:0005819);; Cellular Component: microtubule (GO:0005874);; Biological Process: chromatin silencing (GO:0006342);; Biological Process: intracellular protein transport (GO:0006886);; Biological Process: synaps…	K16803|7.89611e-123|osa:4327486|Os01g0816400; K16803 cytoskeleton-associated protein 5 (A)	--	[Z]	Cytoskeleton	CLASP N terminal;; HEAT repeat	Protein MOR1 OS=Oryza sativa subsp. japonica OX=39947 GN=MOR1 PE=2 SV=1	S	Function unknown	PREDICTED: protein MOR1 isoform X2 [Oryza sativa Japonica Group]	-	10	2	3470553734705480
LOC_OS01G36890	--	--	Molecular Function: RNA binding (GO:0003723);; Molecular Function: protein binding (GO:0005515);; Molecular Function: ATP binding (GO:0005524);; Cellular Component: nucleus (GO:0005634);; Cellular Component: nucleolus (GO:0005730);; Cellular Component: vacuolar membrane (GO:0005774);; Cellular Component: cytosol (GO:0005829);; Biological Process: glucose metabolic process (GO:0006006);; Biologica…	K12812|0|osa:4326192|Os01g0549700; K12812 ATP-dependent RNA helicase UAP56/SUB2 [EC:3.6.4.13] (A)	ko03013:RNA transport;ko03015:mRNA surveillance pathway;ko03040:Spliceosome	[A]	RNA processing and modification	DEAD/DEAH box helicase;; Helicase conserved C-terminal domain;; Type III restriction enzyme, res subunit	DEAD-box ATP-dependent RNA helicase 56 OS=Oryza sativa subsp. japonica OX=39947 GN=AIP1 PE=1 SV=2	L	Replication, recombination and repair	Os01g0549700, partial [Oryza sativa Japonica Group]	+	12	2	2054702820546960
LOC_OS03G55850	--	--	Biological Process: MAPK cascade (GO:0000165);; Biological Process: response to molecule of bacterial origin (GO:0002237);; Biological Process: respiratory burst involved in defense response (GO:0002679);; Cellular Component: mitochondrion (GO:0005739);; Cellular Component: vacuolar membrane (GO:0005774);; Cellular Component: plasma membrane (GO:0005886);; Biological Process: protein targeting to…	--	--	--	--	Cold acclimation protein WCOR413	Cold-regulated 413 plasma membrane protein 2 OS=Arabidopsis thaliana OX=3702 GN=COR413PM2 PE=2 SV=1	S	Function unknown	PREDICTED: cold-regulated 413 plasma membrane protein 2 [Oryza sativa Japonica Group]	+	24	4	3.17932e+31
LOC_OS05G07210	--	--	Molecular Function: zinc ion transmembrane transporter activity (GO:0005385);; Cellular Component: plasma membrane (GO:0005886);; Biological Process: iron ion transport (GO:0006826);; Biological Process: water transport (GO:0006833);; Biological Process: intracellular protein transport (GO:0006886);; Molecular Function: zinc ion binding (GO:0008270);; Biological Process: response to nematode (GO:…	--	--	[P]	Inorganic ion transport and metabolism	ZIP Zinc transporter	Zinc transporter 6 OS=Oryza sativa subsp. japonica OX=39947 GN=ZIP6 PE=2 SV=1	P	Inorganic ion transport and metabolism	PREDICTED: zinc transporter 6 [Oryza sativa Japonica Group]	-	4	1	3808052
LOC_OS07G29360	--	--	Biological Process: mitotic G2 phase (GO:0000085);; Biological Process: mRNA splicing, via spliceosome (GO:0000398);; Biological Process: DNA methylation (GO:0006306);; Biological Process: methylation-dependent chromatin silencing (GO:0006346);; Biological Process: reciprocal meiotic recombination (GO:0007131);; Biological Process: positive regulation of cell proliferation (GO:0008284);; Biologic…	K15176|0|osa:4343217|Os07g0476200; K15176 RNA polymerase-associated protein CTR9 (A)	--	[P]	Inorganic ion transport and metabolism	Tetratricopeptide repeat;; Tetratricopeptide repeat;; Tetratricopeptide repeat;; Tetratricopeptide repeat;; TPR repeat;; Tetratricopeptide repeat;; Tetratricopeptide repeat;; Tetratricopeptide repeat;; Tetratricopeptide repeat;; Tetratricopeptide repeat;; Tetratricopeptide repeat;; Tetratricopeptide repeat;; Fis1 C-terminal tetratricopeptide repeat;; Anaphase-promoting complex, cyclosome, subunit…	Protein CTR9 homolog OS=Arabidopsis thaliana OX=3702 GN=VIP6 PE=1 SV=1	S	Function unknown	PREDICTED: protein CTR9 homolog [Oryza sativa Japonica Group]	-	4	1	17235556
LOC_OS07G48160	--	--	Molecular Function: alpha-galactosidase activity (GO:0004557);; Cellular Component: vacuole (GO:0005773);; Biological Process: fatty acid beta-oxidation (GO:0006635);; Biological Process: lipid transport (GO:0006869);; Biological Process: intra-Golgi vesicle-mediated transport (GO:0006891);; Biological Process: oligosaccharide metabolic process (GO:0009311);; Cellular Component: plant-type cell w…	K07407|0|osa:4344290|Os07g0679300; K07407 alpha-galactosidase [EC:3.2.1.22] (A)	ko00052:Galactose metabolism;ko00561:Glycerolipid metabolism;ko00600:Sphingolipid metabolism;ko00603:Glycosphingolipid biosynthesis - globo series	[G]	Carbohydrate transport and metabolism	Alpha galactosidase A;; Alpha galactosidase A C-terminal beta sandwich domain;; Melibiase	Alpha-galactosidase 3 OS=Arabidopsis thaliana OX=3702 GN=AGAL3 PE=1 SV=1	G	Carbohydrate transport and metabolism	PREDICTED: alpha-galactosidase 3 [Oryza sativa Japonica Group]	+	12	3	2.87692e+23
LOC_OS04G43420	--	--	Biological Process: metabolic process (GO:0008152);; Cellular Component: plastid chromosome (GO:0009508);; Cellular Component: chloroplast thylakoid membrane (GO:0009535);; Cellular Component: chloroplast envelope (GO:0009941);; Molecular Function: heat shock protein binding (GO:0031072);; Cellular Component: cell part (GO:0044464);; Molecular Function: unfolded protein binding (GO:0051082);;	--	--	--	--	Putative peptidoglycan binding domain	Protein disulfide isomerase pTAC5, chloroplastic OS=Arabidopsis thaliana OX=3702 GN=PTAC5 PE=1 SV=1	S	Function unknown	PREDICTED: uncharacterized protein LOC4336393 [Oryza sativa Japonica Group]	+	3	1	25703264
LOC_OS02G28900	--	--	Cellular Component: mitochondrion (GO:0005739);; Biological Process: protein targeting to membrane (GO:0006612);; Biological Process: metabolic process (GO:0008152);; Biological Process: salicylic acid mediated signaling pathway (GO:0009863);; Biological Process: jasmonic acid mediated signaling pathway (GO:0009867);; Biological Process: regulation of plant-type hypersensitive response (GO:001036…	--	--	[GC]	--	UDP-glucoronosyl and UDP-glucosyl transferase	7-deoxyloganetin glucosyltransferase OS=Gardenia jasminoides OX=114476 GN=UGT85A24 PE=1 SV=1	S	Function unknown	PREDICTED: 7-deoxyloganetin glucosyltransferase [Oryza sativa Japonica Group]	+	3	1	17120695
LOC_OS07G39280	--	--	Molecular Function: GDP-fucose transmembrane transporter activity (GO:0005457);; Molecular Function: UDP-galactose transmembrane transporter activity (GO:0005459);; Molecular Function: UDP-glucose transmembrane transporter activity (GO:0005460);; Cellular Component: endosome (GO:0005768);; Cellular Component: Golgi apparatus (GO:0005794);; Cellular Component: trans-Golgi network (GO:0005802);; Ce…	--	--	[GE]	--	Triose-phosphate Transporter family;; Solute carrier family 35	UDP-rhamnose/UDP-galactose transporter 2 OS=Arabidopsis thaliana OX=3702 GN=URGT2 PE=1 SV=1	S	Function unknown	PREDICTED: UDP-galactose transporter 2 [Oryza sativa Japonica Group]	-	54	4	2.35119e+31
LOC_OS03G15020	--	--	Molecular Function: beta-galactosidase activity (GO:0004565);; Cellular Component: cell wall (GO:0005618);; Cellular Component: vacuolar membrane (GO:0005774);; Cellular Component: cytosol (GO:0005829);; Biological Process: carbohydrate metabolic process (GO:0005975);; Biological Process: acetyl-CoA metabolic process (GO:0006084);; Biological Process: polyamine catabolic process (GO:0006598);; Ce…	--	--	[G]	Carbohydrate transport and metabolism	Glycosyl hydrolases family 35;; Galactose binding lectin domain;; Beta-galactosidase;; Beta-galactosidase jelly roll domain	Beta-galactosidase 6 OS=Oryza sativa subsp. japonica OX=39947 GN=Os03g0255100 PE=1 SV=2	G	Carbohydrate transport and metabolism	PREDICTED: beta-galactosidase 6 [Oryza sativa Japonica Group]	-	18	1	8196136
LOC_OS07G46280	--	--	Molecular Function: glucan exo-1,3-beta-glucosidase activity (GO:0004338);; Molecular Function: beta-galactosidase activity (GO:0004565);; Molecular Function: beta-mannosidase activity (GO:0004567);; Cellular Component: mitochondrion (GO:0005739);; Biological Process: carbohydrate metabolic process (GO:0005975);; Molecular Function: zinc ion binding (GO:0008270);; Cellular Component: plant-type c…	--	--	[G]	Carbohydrate transport and metabolism	Glycosyl hydrolase family 1	Beta-glucosidase 26 OS=Oryza sativa subsp. japonica OX=39947 GN=BGLU26 PE=1 SV=1	G	Carbohydrate transport and metabolism	PREDICTED: beta-glucosidase 26 isoform X1 [Oryza sativa Japonica Group]	+	24	3	2.76185e+23
LOC_OS05G03820	--	--	Biological Process: defense response to insect (GO:0002213);; Molecular Function: nucleic acid binding (GO:0003676);; Molecular Function: glutamate-cysteine ligase activity (GO:0004357);; Molecular Function: chitinase activity (GO:0004568);; Molecular Function: protein serine/threonine kinase activity (GO:0004674);; Molecular Function: ATP binding (GO:0005524);; Cellular Component: extracellular …	K01919|0|osa:4337696|Os05g0129000; K01919 glutamate--cysteine ligase [EC:6.3.2.2] (A)	ko00480:Glutathione metabolism	--	--	Glutamate-cysteine ligase family 2(GCS2)	Glutamate--cysteine ligase A, chloroplastic OS=Oryza sativa subsp. japonica OX=39947 GN=GSH1-1 PE=2 SV=1	H	Coenzyme transport and metabolism	hypothetical protein OsJ_16990 [Oryza sativa Japonica Group]	+	5	2	17028711702921
LOC_OS12G08280	--	--	Biological Process: response to hypoxia (GO:0001666);; Cellular Component: nucleus (GO:0005634);; Cellular Component: mitochondrion (GO:0005739);; Biological Process: sulfur compound metabolic process (GO:0006790);; Molecular Function: 3'(2'),5'-bisphosphate nucleotidase activity (GO:0008441);; Molecular Function: inositol monophosphate 1-phosphatase activity (GO:0008934);; Biological Process: re…	K15422|0|osa:4351686|Os12g0183300; K15422 3'(2'), 5'-bisphosphate nucleotidase / inositol polyphosphate 1-phosphatase [EC:3.1.3.7 3.1.3.57] (A)	ko00562:Inositol phosphate metabolism;ko00920:Sulfur metabolism;ko04070:Phosphatidylinositol signaling system	[FP]	--	Inositol monophosphatase family	3&apos;(2&apos;),5&apos;-bisphosphate nucleotidase OS=Oryza sativa subsp. japonica OX=39947 GN=Os12g0183300 PE=2 SV=1	P	Inorganic ion transport and metabolism	RecName: Full=3&apos;(2&apos;),5&apos;-bisphosphate nucleotidase; AltName: Full=3&apos;(2&apos;),5-bisphosphonucleoside 3&apos;(2&apos;)-phosphohydrolase; AltName: Full=DPNPase	-	24	4	4.21668e+27
LOC_OS06G03930	--	--	Molecular Function: monooxygenase activity (GO:0004497);; Molecular Function: iron ion binding (GO:0005506);; Molecular Function: protein binding (GO:0005515);; Cellular Component: endoplasmic reticulum (GO:0005783);; Biological Process: isoprenoid biosynthetic process (GO:0008299);; Molecular Function: electron carrier activity (GO:0009055);; Biological Process: response to wounding (GO:0009611)…	--	--	[QI]	--	Cytochrome P450	Cytochrome P450 704C1 OS=Pinus taeda OX=3352 GN=CYP704C1 PE=2 SV=1	Q	Secondary metabolites biosynthesis, transport and catabolism	PREDICTED: cytochrome P450 704C1 [Oryza sativa Japonica Group]	-	10	1	1582106
LOC_OS11G02424	--	--	Molecular Function: ubiquitin-protein transferase activity (GO:0004842);; Biological Process: lipid transport (GO:0006869);; Molecular Function: zinc ion binding (GO:0008270);; Molecular Function: lipid binding (GO:0008289);; Biological Process: pollen development (GO:0009555);; Biological Process: response to wounding (GO:0009611);; Biological Process: response to ethylene (GO:0009723);; Biologi…	--	--	[O]	Posttranslational modification, protein turnover, chaperones	Ring finger domain;; RING-like zinc finger;; Zinc finger, C3HC4 type (RING finger);; RING-H2 zinc finger domain;; Anaphase-promoting complex subunit 11 RING-H2 finger;; Zinc finger, C3HC4 type (RING finger)	RING-H2 finger protein ATL74 OS=Arabidopsis thaliana OX=3702 GN=ATL74 PE=2 SV=1	O	Posttranslational modification, protein turnover, chaperones	PREDICTED: RING-H2 finger protein ATL74 [Oryza sativa Japonica Group]	+	24	2	724410724429
LOC_OS06G10990	--	--	Molecular Function: nucleotide binding (GO:0000166);; Molecular Function: KDEL sequence binding (GO:0005046);; Molecular Function: ATP binding (GO:0005524);; Cellular Component: cell wall (GO:0005618);; Cellular Component: mitochondrion (GO:0005739);; Cellular Component: vacuolar membrane (GO:0005774);; Cellular Component: endoplasmic reticulum (GO:0005783);; Cellular Component: Golgi apparatus (…	K09490|0|osa:4340470|Os06g0212900; K09490 heat shock 70kDa protein 5 (A)	ko03060:Protein export;ko04141:Protein processing in endoplasmic reticulum	[O]	Posttranslational modification, protein turnover, chaperones	NAD-specific glutamate dehydrogenase	Luminal-binding protein 4 OS=Nicotiana tabacum OX=4097 GN=BIP4 PE=2 SV=1	O	Posttranslational modification, protein turnover, chaperones	PREDICTED: luminal-binding protein 4 [Oryza sativa Japonica Group]	-	6	1	5745188
LOC_OS04G57970	--	--	Cellular Component: mitochondrion (GO:0005739);; Cellular Component: plastid (GO:0009536);; Biological Process: cellular process (GO:0009987);; Cellular Component: intracellular organelle part (GO:0044446);;	--	--	--	--	Domain of unknown function (DUF4408)	--	S	Function unknown	PREDICTED: uncharacterized protein LOC4337397 [Oryza sativa Japonica Group]	+	3	1	34536095
LOC_OS12G04204	#N/A	#N/A	#N/A	#N/A	#N/A	#N/A	#N/A	#N/A	#N/A	#N/A	#N/A	#N/A	-	40	5	1.77259e+34
LOC_OS02G54780	--	--	Cellular Component: nucleus (GO:0005634);; Cellular Component: cytosol (GO:0005829);; Cellular Component: plasma membrane (GO:0005886);; Biological Process: cellular process (GO:0009987);; Cellular Component: intracellular organelle (GO:0043229);;	--	--	[U]	Intracellular trafficking, secretion, and vesicular transport	VID27 cytoplasmic protein	Protein CYPRO4 OS=Cynara cardunculus OX=4265 GN=CYPRO4 PE=2 SV=1	U	Intracellular trafficking, secretion, and vesicular transport	PREDICTED: protein CYPRO4 [Oryza sativa Japonica Group]	+	15	1	33550715
LOC_OS05G49380	--	--	Molecular Function: serine-type endopeptidase activity (GO:0004252);; Cellular Component: nucleus (GO:0005634);; Biological Process: pentose-phosphate shunt (GO:0006098);; Biological Process: proteolysis (GO:0006508);; Biological Process: organelle organization (GO:0006996);; Molecular Function: peptidase activity (GO:0008233);; Cellular Component: chloroplast thylakoid membrane (GO:0009535);; Ce…	K01362|0|osa:4339651|Os05g0568900; K01362 [EC:3.4.21.-] (A)	--	[O]	Posttranslational modification, protein turnover, chaperones	Trypsin-like peptidase domain;; PDZ domain;; Trypsin	Protease Do-like 1, chloroplastic OS=Arabidopsis thaliana OX=3702 GN=DEGP1 PE=1 SV=2	O	Posttranslational modification, protein turnover, chaperones	PREDICTED: protease Do-like 1, chloroplastic [Oryza sativa Japonica Group]	-	11	1	28315252
LOC_OS02G07490	--	--	Molecular Function: glyceraldehyde-3-phosphate dehydrogenase (NAD+) (phosphorylating) activity (GO:0004365);; Molecular Function: copper ion binding (GO:0005507);; Cellular Component: cell wall (GO:0005618);; Cellular Component: nucleolus (GO:0005730);; Cellular Component: mitochondrial envelope (GO:0005740);; Cellular Component: Golgi apparatus (GO:0005794);; Cellular Component: cytosol (GO:0005…	K00134|0|osa:4328446|Os02g0171100; K00134 glyceraldehyde 3-phosphate dehydrogenase [EC:1.2.1.12] (A)	ko00010:Glycolysis / Gluconeogenesis;ko00710:Carbon fixation in photosynthetic organisms;ko01200:Carbon metabolism;ko01230:Biosynthesis of amino acids	[G]	Carbohydrate transport and metabolism	Glyceraldehyde 3-phosphate dehydrogenase, C-terminal domain;; Glyceraldehyde 3-phosphate dehydrogenase, NAD binding domain	Glyceraldehyde-3-phosphate dehydrogenase GAPCP2, chloroplastic OS=Arabidopsis thaliana OX=3702 GN=GAPCP2 PE=2 SV=1	G	Carbohydrate transport and metabolism	PREDICTED: glyceraldehyde-3-phosphate dehydrogenase GAPCP1, chloroplastic [Oryza sativa Japonica Group]	+	4	1	3872890
LOC_OS06G39520	--	--	Molecular Function: ACP phosphopantetheine attachment site binding involved in fatty acid biosynthetic process (GO:0000036);; Biological Process: fatty acid biosynthetic process (GO:0006633);; Cellular Component: chloroplast (GO:0009507);; Cellular Component: plastid (GO:0009536);; Molecular Function: acyl-[acyl-carrier-protein] hydrolase activity (GO:0016297);;	K10781|0|dosa:Os06t0596300-01|Os06g0596300; Similar to Acyl-ACP thioesterase (Fragment).; K10781 fatty acyl-ACP thioesterase B [EC:3.1.2.14 3.1.2.21] (A)	ko00061:Fatty acid biosynthesis;ko01212:Fatty acid metabolism	--	--	Acyl-ACP thioesterase;; Acyl-ATP thioesterase	Palmitoyl-acyl carrier protein thioesterase, chloroplastic OS=Arabidopsis thaliana OX=3702 GN=FATB PE=1 SV=1	I	Lipid transport and metabolism	Os06g0596300 [Oryza sativa Japonica Group]	+	17	3	2.34716e+23
LOC_OS03G42840	--	--	Biological Process: polysaccharide biosynthetic process (GO:0000271);; Molecular Function: calcium ion binding (GO:0005509);; Biological Process: detection of calcium ion (GO:0005513);; Molecular Function: protein binding (GO:0005515);; Cellular Component: plasma membrane (GO:0005886);; Biological Process: response to cold (GO:0009409);; Biological Process: response to water deprivation (GO:00094…	K06268|6.09663e-163|osa:4333502|Os03g0626800; K06268 serine/threonine-protein phosphatase 2B regulatory subunit (A)	--	[T]	Signal transduction mechanisms	EF hand;; EF hand;; EF-hand domain pair;; EF-hand domain;; EF-hand domain pair	Calcineurin B-like protein 3 OS=Oryza sativa subsp. japonica OX=39947 GN=CBL3 PE=1 SV=1	DTZ	--	PREDICTED: calcineurin B-like protein 3 [Oryza sativa Japonica Group]	+	7	2	2389538723895400
LOC_OS02G06720	--	--	Cellular Component: mitochondrion (GO:0005739);; Cellular Component: cytoplasmic membrane-bounded vesicle (GO:0016023);;	--	--	[U]	Intracellular trafficking, secretion, and vesicular transport	Beige/BEACH domain;; PH domain associated with Beige/BEACH;; WD domain, G-beta repeat;; Domain of unknown function (DUF4800);; Anaphase-promoting complex subunit 4 WD40 domain	BEACH domain-containing protein B OS=Arabidopsis thaliana OX=3702 GN=BCHB PE=4 SV=1	S	Function unknown	PREDICTED: BEACH domain-containing protein B isoform X2 [Oryza sativa Japonica Group]	-	7	1	3362822
LOC_OS08G01430	--	--	Biological Process: anatomical structure morphogenesis (GO:0009653);; Biological Process: cellular component organization (GO:0016043);; Biological Process: cell differentiation (GO:0030154);; Biological Process: root development (GO:0048364);; Biological Process: developmental growth (GO:0048589);; Cellular Component: cell periphery (GO:0071944);;	--	--	--	--	F-box domain	F-box protein At5g39450 OS=Arabidopsis thaliana OX=3702 GN=At5g39450 PE=2 SV=1	S	Function unknown	PREDICTED: F-box protein At5g39450 [Oryza sativa Japonica Group]	-	3	1	277928
LOC_OS03G12530	--	--	Cellular Component: nucleus (GO:0005634);; Cellular Component: late endosome (GO:0005770);; Cellular Component: vacuolar membrane (GO:0005774);; Cellular Component: Golgi apparatus (GO:0005794);; Biological Process: cation transport (GO:0006812);; Molecular Function: cation transmembrane transporter activity (GO:0008324);; Biological Process: anthocyanin-containing compound biosynthetic process (…	--	--	[P]	Inorganic ion transport and metabolism	Cation efflux family;; Dimerisation domain of Zinc Transporter	Metal tolerance protein 4 OS=Oryza sativa subsp. japonica OX=39947 GN=MTP4 PE=2 SV=1	P	Inorganic ion transport and metabolism	Os03g0226400, partial [Oryza sativa Japonica Group]	+	6	1	6641085
LOC_OS06G50850	--	--	--	--	--	--	--	--	--	S	Function unknown	hypothetical protein [Oryza sativa Japonica Group]	+	7	1	30770552
LOC_OS03G51270	--	--	Cellular Component: mitochondrion (GO:0005739);;	--	--	--	--	F-box domain	Putative F-box/LRR-repeat protein At5g02700 OS=Arabidopsis thaliana OX=3702 GN=At5g02700 PE=4 SV=1	S	Function unknown	Leucine Rich Repeat, putative [Oryza sativa Japonica Group]	-	6	1	29329167
LOC_OS07G04980	--	--	Cellular Component: cytoplasmic membrane-bounded vesicle (GO:0016023);;	--	--	--	--	FBD	--	--	--	hypothetical protein OsI_24864 [Oryza sativa Indica Group]	+	7	2	21933882193355
LOC_OS08G04620	--	--	Molecular Function: structural molecule activity (GO:0005198);; Cellular Component: nucleus (GO:0005634);; Cellular Component: endoplasmic reticulum (GO:0005783);; Cellular Component: plasma membrane (GO:0005886);; Biological Process: N-terminal protein myristoylation (GO:0006499);; Biological Process: protein targeting to vacuole (GO:0006623);; Biological Process: response to osmotic stress (GO:…	--	--	[U]	Intracellular trafficking, secretion, and vesicular transport	MSP (Major sperm protein) domain	Vesicle-associated protein 4-2 OS=Arabidopsis thaliana OX=3702 GN=PVA42 PE=1 SV=1	U	Intracellular trafficking, secretion, and vesicular transport	27k vesicle-associated membrane protein-associated protein-like [Oryza sativa Japonica Group]	+	3	1	2308491
LOC_OS04G51560	--	--	Molecular Function: DNA binding (GO:0003677);; Molecular Function: sequence-specific DNA binding transcription factor activity (GO:0003700);; Molecular Function: calmodulin binding (GO:0005516);; Cellular Component: nucleus (GO:0005634);; Cellular Component: mitochondrion (GO:0005739);; Biological Process: regulation of transcription, DNA-templated (GO:0006355);; Biological Process: iron ion tran…	--	--	--	--	WRKY DNA -binding domain;; Plant zinc cluster domain	Probable WRKY transcription factor 11 OS=Arabidopsis thaliana OX=3702 GN=WRKY11 PE=2 SV=2	K	Transcription	HKT1;2 transporter [Oryza nivara]	+	6	1	30546517
LOC_OS01G62870	--	--	Cellular Component: nucleus (GO:0005634);; Cellular Component: cytosol (GO:0005829);; Biological Process: cellular aromatic compound metabolic process (GO:0006725);; Molecular Function: alcohol dehydrogenase (NADP+) activity (GO:0008106);; Biological Process: response to cold (GO:0009409);; Biological Process: response to water deprivation (GO:0009414);; Cellular Component: chloroplast (GO:000950…	--	--	[R]	General function prediction only	Aldo/keto reductase family	Aldo-keto reductase family 4 member C10 OS=Arabidopsis thaliana OX=3702 GN=AKR4C10 PE=1 SV=1	S	Function unknown	PREDICTED: aldo-keto reductase family 4 member C10 [Oryza sativa Japonica Group]	+	8	2	3641457636414600
LOC_OS05G40200	--	--	Biological Process: polysaccharide catabolic process (GO:0000272);; Molecular Function: protein kinase activity (GO:0004672);; Molecular Function: protein serine/threonine kinase activity (GO:0004674);; Molecular Function: ATP binding (GO:0005524);; Cellular Component: extracellular region (GO:0005576);; Cellular Component: mitochondrion (GO:0005739);; Cellular Component: vacuolar membrane (GO:00…	--	--	--	--	Protein kinase domain;; Protein tyrosine kinase;; Leucine Rich repeats (2 copies);; Leucine rich repeat;; Leucine rich repeat N-terminal domain;; Leucine Rich Repeat	Probable inactive receptor kinase At5g58300 OS=Arabidopsis thaliana OX=3702 GN=At5g58300 PE=2 SV=1	S	Function unknown	PREDICTED: probable inactive receptor kinase At5g58300 [Oryza sativa Japonica Group]	-	5	1	23605439
LOC_OS01G61230	--	--	Biological Process: alternative mRNA splicing, via spliceosome (GO:0000380);; Molecular Function: double-stranded DNA binding (GO:0003690);; Molecular Function: single-stranded DNA binding (GO:0003697);; Molecular Function: mRNA binding (GO:0003729);; Molecular Function: protein kinase activity (GO:0004672);; Molecular Function: calmodulin binding (GO:0005516);; Cellular Component: cell wall (GO:…	--	--	[V]	Defense mechanisms	NAD dependent epimerase/dehydratase family;; 3-beta hydroxysteroid dehydrogenase/isomerase family;; GDP-mannose 4,6 dehydratase;; Male sterility protein;; NAD(P)H-binding;; NmrA-like family;; KR domain;; Polysaccharide biosynthesis protein	Cinnamoyl-CoA reductase 1 OS=Oryza sativa subsp. japonica OX=39947 GN=CCR1 PE=1 SV=1	M	Cell wall/membrane/envelope biogenesis	PREDICTED: cinnamoyl-CoA reductase 1 [Oryza sativa Japonica Group]	+	5	1	35432857
LOC_OS04G36058	--	--	Molecular Function: DNA binding (GO:0003677);; Cellular Component: nucleus (GO:0005634);; Biological Process: regulation of transcription, DNA-templated (GO:0006355);; Biological Process: N-terminal protein myristoylation (GO:0006499);; Biological Process: auxin-activated signaling pathway (GO:0009734);; Molecular Function: protein dimerization activity (GO:0046983);;	--	--	[L]	Replication, recombination and repair	Domain of unknown function (DUF1771);; Smr domain	Polyadenylate-binding protein-interacting protein 7 OS=Arabidopsis thaliana OX=3702 GN=CID7 PE=1 SV=1	S	Function unknown	PREDICTED: polyadenylate-binding protein-interacting protein 7 [Oryza sativa Japonica Group]	+	16	2	2201704622017080
LOC_OS01G70010	--	--	Biological Process: RNA methylation (GO:0001510);; Molecular Function: structural constituent of ribosome (GO:0003735);; Cellular Component: nucleolus (GO:0005730);; Cellular Component: vacuolar membrane (GO:0005774);; Cellular Component: Golgi apparatus (GO:0005794);; Cellular Component: plasma membrane (GO:0005886);; Biological Process: translation (GO:0006412);; Cellular Component: chloroplast…	K02936|1.73952e-123|obr:102705183|60S ribosomal protein L7a-like; K02936 large subunit ribosomal protein L7Ae (A)	ko03010:Ribosome	[J]	Translation, ribosomal structure and biogenesis	Ribosomal protein L7Ae/L30e/S12e/Gadd45 family	60S ribosomal protein L7a-2 OS=Oryza sativa subsp. japonica OX=39947 GN=RPL7A-2 PE=2 SV=1	J	Translation, ribosomal structure and biogenesis	putative 60S ribosomal protein L7A [Oryza sativa Japonica Group]	-	7	2	4049619040496160
LOC_OS02G34730	--	--	Biological Process: phosphatidylinositol biosynthetic process (GO:0006661);; Cellular Component: cytoplasmic membrane-bounded vesicle (GO:0016023);;	--	--	--	--	Domain of unknown function (DUF4750)	--	S	Function unknown	PREDICTED: uncharacterized protein LOC107277178 [Oryza sativa Japonica Group]	-	7	1	20832837
LOC_OS07G41360	--	--	Cellular Component: Golgi trans cisterna (GO:0000138);; Molecular Function: protein binding (GO:0005515);; Cellular Component: extracellular region (GO:0005576);; Cellular Component: cell wall (GO:0005618);; Cellular Component: nucleus (GO:0005634);; Cellular Component: vacuolar membrane (GO:0005774);; Cellular Component: Golgi apparatus (GO:0005794);; Cellular Component: cytosol (GO:0005829);; B…	K13379|0|osa:4343849|Os07g0604800; K13379 reversibly glycosylated polypeptide / UDP-arabinopyranose mutase [EC:2.4.1.- 5.4.99.30] (A)	--	--	--	Reversibly glycosylated polypeptide	UDP-arabinopyranose mutase 3 OS=Oryza sativa subsp. japonica OX=39947 GN=UAM3 PE=1 SV=1	O	Posttranslational modification, protein turnover, chaperones	PREDICTED: UDP-arabinopyranose mutase 3 [Oryza sativa Japonica Group]	+	16	1	24776521
LOC_OS04G31070	--	--	Biological Process: sulfur amino acid metabolic process (GO:0000096);; Biological Process: defense response to insect (GO:0002213);; Molecular Function: stearoyl-CoA 9-desaturase activity (GO:0004768);; Biological Process: glycine catabolic process (GO:0006546);; Biological Process: fatty acid biosynthetic process (GO:0006633);; Biological Process: unsaturated fatty acid biosynthetic process (GO:…	K03921|0|osa:4335627|Os04g0379900; K03921 acyl-[acyl-carrier-protein] desaturase [EC:1.14.19.2] (A)	ko00061:Fatty acid biosynthesis;ko01040:Biosynthesis of unsaturated fatty acids;ko01212:Fatty acid metabolism	--	--	Fatty acid desaturase	Stearoyl-[acyl-carrier-protein] 9-desaturase 5, chloroplastic OS=Oryza sativa subsp. japonica OX=39947 GN=Os04g0379900 PE=2 SV=2	I	Lipid transport and metabolism	PREDICTED: stearoyl-[acyl-carrier-protein] 9-desaturase 5, chloroplastic [Oryza sativa Japonica Group]	-	67	4	1.85603e+31
LOC_OS06G46880	--	--	Molecular Function: RNA binding (GO:0003723);; Biological Process: RNA processing (GO:0006396);; Biological Process: anatomical structure morphogenesis (GO:0009653);; Biological Process: cellular component organization (GO:0016043);; Biological Process: cell differentiation (GO:0030154);; Biological Process: multicellular organismal process (GO:0032501);; Cellular Component: cell part (GO:0044464…	--	--	[A]	RNA processing and modification	Surp module;; RNA polymerase II-binding domain.	--	S	Function unknown	Os06g0682750 [Oryza sativa Japonica Group]	-	3	1	28453186
LOC_OS02G42850	--	--	Biological Process: tryptophan biosynthetic process (GO:0000162);; Biological Process: MAPK cascade (GO:0000165);; Biological Process: defense response to insect (GO:0002213);; Molecular Function: DNA binding (GO:0003677);; Molecular Function: chromatin binding (GO:0003682);; Molecular Function: sequence-specific DNA binding transcription factor activity (GO:0003700);; Cellular Component: nucleus…	K09422|5.19076e-161|osa:4330115|Os02g0641300; K09422 myb proto-oncogene protein, plant (A)	--	[K]	Transcription	Myb-like DNA-binding domain;; Myb-like DNA-binding domain	Transcription factor LAF1 OS=Arabidopsis thaliana OX=3702 GN=LAF1 PE=1 SV=2	K	Transcription	PREDICTED: transcription factor MYB21 [Oryza sativa Japonica Group]	+	4	1	25762832
LOC_OS06G47294	--	--	Biological Process: polysaccharide biosynthetic process (GO:0000271);; Cellular Component: endosome (GO:0005768);; Cellular Component: vacuolar membrane (GO:0005774);; Cellular Component: Golgi apparatus (GO:0005794);; Cellular Component: trans-Golgi network (GO:0005802);; Cellular Component: plasma membrane (GO:0005886);; Biological Process: response to stress (GO:0006950);; Molecular Function: …	--	--	--	--	Putative S-adenosyl-L-methionine-dependent methyltransferase;; Methyltransferase domain;; Methyltransferase domain	Probable methyltransferase PMT9 OS=Arabidopsis thaliana OX=3702 GN=At5g14430 PE=2 SV=1	S	Function unknown	PREDICTED: probable methyltransferase PMT9 isoform X1 [Oryza sativa Japonica Group]	-	8	3	2.86636e+23
LOC_OS06G19730	--	--	Cellular Component: proteasome complex (GO:0000502);;	K06699|0|osa:4340828|Os06g0301300; K06699 proteasome activator subunit 4 (A)	ko03050:Proteasome	[S]	Function unknown	Proteasome-substrate-size regulator, mid region;; Domain of unknown function (DUF3437);; HEAT repeat	Proteasome activator subunit 4 OS=Arabidopsis thaliana OX=3702 GN=PA200 PE=2 SV=2	O	Posttranslational modification, protein turnover, chaperones	proteasome activator subunit 4-like [Oryza sativa Japonica Group]	+	9	2	1128160011281670
LOC_OS03G49510	--	--	Molecular Function: actin monomer binding (GO:0003785);; Molecular Function: ATP binding (GO:0005524);; Cellular Component: cytosol (GO:0005829);; Cellular Component: plasma membrane (GO:0005886);; Biological Process: cellular protein modification process (GO:0006464);; Biological Process: organelle organization (GO:0006996);; Biological Process: establishment of tissue polarity (GO:0007164);; Bi…	K00889|0|osa:4333833|Os03g0701800; K00889 1-phosphatidylinositol-4-phosphate 5-kinase [EC:2.7.1.68] (A)	ko00562:Inositol phosphate metabolism;ko04070:Phosphatidylinositol signaling system;ko04144:Endocytosis	[T]	Signal transduction mechanisms	Phosphatidylinositol-4-phosphate 5-Kinase;; MORN repeat	Phosphatidylinositol 4-phosphate 5-kinase 1 OS=Oryza sativa subsp. japonica OX=39947 GN=PIPK1 PE=2 SV=2	T	Signal transduction mechanisms	phosphatidylinositol 4-phosphate 5-kinase [Oryza sativa Japonica Group]	+	9	3	2.81859e+23
LOC_OS03G38980	--	--	Molecular Function: nucleic acid binding (GO:0003676);; Molecular Function: lysine-tRNA ligase activity (GO:0004824);; Molecular Function: ATP binding (GO:0005524);; Cellular Component: cytoplasm (GO:0005737);; Cellular Component: cytosol (GO:0005829);; Biological Process: lysyl-tRNA aminoacylation (GO:0006430);; Biological Process: nucleotide biosynthetic process (GO:0009165);; Cellular Componen…	K04567|0|osa:4333345|Os03g0586800; K04567 lysyl-tRNA synthetase, class II [EC:6.1.1.6] (A)	ko00970:Aminoacyl-tRNA biosynthesis	[J]	Translation, ribosomal structure and biogenesis	tRNA synthetases class II (D, K and N);; OB-fold nucleic acid binding domain;; tRNA synthetases class II core domain (F)	Lysine--tRNA ligase OS=Oryza sativa subsp. japonica OX=39947 GN=Os03g0586800 PE=2 SV=1	J	Translation, ribosomal structure and biogenesis	PREDICTED: lysine--tRNA ligase [Oryza sativa Japonica Group]	-	8	3	2.16653e+23
LOC_OS03G10820	--	--	Biological Process: microtubule cytoskeleton organization (GO:0000226);; Cellular Component: nucleus (GO:0005634);; Cellular Component: peroxisome (GO:0005777);; Cellular Component: plastid (GO:0009536);; Biological Process: chloroplast organization (GO:0009658);; Biological Process: organ morphogenesis (GO:0009887);; Biological Process: primary metabolic process (GO:0044238);; Biological Process…	--	--	--	--	QWRF family	QWRF motif-containing protein 2 OS=Arabidopsis thaliana OX=3702 GN=QWRF2 PE=2 SV=1	S	Function unknown	PREDICTED: QWRF motif-containing protein 2 [Oryza sativa Japonica Group]	-	9	1	5547225
LOC_OS06G45350	--	--	Biological Process: response to molecule of fungal origin (GO:0002238);; Molecular Function: protein serine/threonine kinase activity (GO:0004674);; Molecular Function: ATP binding (GO:0005524);; Cellular Component: nucleus (GO:0005634);; Cellular Component: cytosol (GO:0005829);; Cellular Component: plasma membrane (GO:0005886);; Biological Process: protein phosphorylation (GO:0006468);; Cellula…	--	--	[T]	Signal transduction mechanisms	Protein kinase domain;; Protein tyrosine kinase	Receptor-like cytosolic serine/threonine-protein kinase RBK1 OS=Arabidopsis thaliana OX=3702 GN=RBK1 PE=1 SV=1	T	Signal transduction mechanisms	putative receptor protein kinase PERK1 [Oryza sativa Japonica Group]	+	10	2	2741750927417480
[truncated: 6,950 more rows]

## Sheet: F02
Table S3 Functional annotation of transcripts in the polyadenylation events
[truncated: 4,136 more rows]

[truncated: 1 more sheets: F03]
